# Supplementary material for: Quantification of somatic mutation flow across individual cell division events by lineage sequencing
Source: HighWire-hosted journal article supplement (doi:10.1101/gr.238543.118), 2018-11-20
Supplement: Supplemental_Table_S1.xlsx [file Supplemental_Table_S1.xlsx]

## Sheet: Sheet1
table S1 TCGA POLE mutant colorectal and uterine corpus endometrial cancer sample annotations.
Sample	Correlation		Mutation	Type
HT115		Missense	p.V411L	CRC
		Missense	p.L1235I
COAD-A6-6141	0.91	Missense	p.S297F	CRC
COAD-AA-3555	0.91	Missense	p.P286H	CRC
COAD-AA-3977	0.93	Missense	p.K777N	CRC
		Missense	p.F367S
COAD-AA-A00N	0.91	Missense	p.L1255V	CRC
		Missense	p.V411L
COAD-AZ-4315	0.93	Missense	p.R1826W	CRC
		Missense	p.R1556W
		Missense	p.V411L
COAD-CA-6717	0.97	Missense	p.L1235I	CRC
		Nonsense	p.R1371*
COAD-CA-6718	0.94	Missense	p.P286R	CRC
READ-AG-A002	0.9	Missense	p.S459F	CRC
		Nonsense	p.R150*
READ-EI-6917	0.85	Missense	p.A426V	CRC
		Missense	p.V411L
READ-F5-6814	0.96	Missense	p.P286R	CRC
* CRC - colorectal cancer
This study examines the cosine similarity between HT115 branch variants mutation spectra with mutation spectra derived from tumor-normal whole genome sequencing of patients with previously identified POLE proofreading deficiency generated by the TCGA Research Network. Cosine similarity was calculated with 95% intervals by bootstrapping the HT115 spectra 104 times. This table lists the germline co…
