# Supplementary material for: Quantification of somatic mutation flow across individual cell division events by lineage sequencing
Source: HighWire-hosted journal article supplement (doi:10.1101/gr.238543.118), 2018-11-20
Supplement: Supplemental_Table_S2.xlsx [file Supplemental_Table_S2.xlsx]

## Sheet: Supplemental_Table_S2
Supplemental table S2
This table lists the complete SNV lists calculated by the ‘optical tracking -> lineage -> called variants’ approach. For HT115 lineage branch variants (2779 SNVs) and leaf variants (9883 SNVs). Coordinates are in hg19.
index	chromosome	position	context	reference_allele	alternative_allele	full_data	vector	ref_af	alt_af	Min_prob	Branch[1], leaf[0]
0	1	11627343	ACCxTTC	C	A	[('HT6W37', ': ', array([ 0, 0, 41, 0]), ' ', array([ 0., 0., 1., 0.]), ' ', array([ 0., 0., 1., 0.])), ('HT6W45', ': ', array([ 0, 0, 43, 0]), ' ', array([ 0., 0., 1., 0.]), ' ', array([ 0., 0., 1., 0.])), ('HT6W47', ': ', array([ 0, 0, 36, 0]), ' ', array([ 0., 0., 1., 0.]), ' ', array([ 0., 0., 1., 0.])), ('HT6W48', ': ', array([ 0, 0, 45, 1]), ' ', array([ 0. , 0. , 0.97826087, 0.02173913]), …	100010	0.997585	0.515294	1	1
1	1	14619240	ATCxTTT	A	G	[('HT6W37', ': ', array([33, 1, 0, 0]), ' ', array([ 0.97058824, 0.02941176, 0. , 0. ]), ' ', array([ 1., 0., 0., 0.])), ('HT6W45', ': ', array([46, 0, 0, 0]), ' ', array([ 1., 0., 0., 0.]), ' ', array([ 1., 0., 0., 0.])), ('HT6W47', ': ', array([29, 0, 0, 0]), ' ', array([ 1., 0., 0., 0.]), ' ', array([ 1., 0., 0., 0.])), ('HT6W48', ': ', array([44, 0, 1, 0]), ' ', array([ 0.97777778, 0. , 0.022…	10110010	0.983695	0.467156	1	1
2	1	15032114	CCTxCCA	G	T	[('HT6W37', ': ', array([ 0, 0, 0, 37]), ' ', array([ 0., 0., 0., 1.]), ' ', array([ 0., 0., 0., 1.])), ('HT6W45', ': ', array([ 0, 0, 0, 44]), ' ', array([ 0., 0., 0., 1.]), ' ', array([ 0., 0., 0., 1.])), ('HT6W47', ': ', array([ 0, 0, 0, 43]), ' ', array([ 0., 0., 0., 1.]), ' ', array([ 0., 0., 0., 1.])), ('HT6W48', ': ', array([ 0, 0, 0, 44]), ' ', array([ 0., 0., 0., 1.]), ' ', array([ 0., 0…	100010	0.997732	0.407256	1	1
3	1	17853360	ACCxCTG	A	C	[('HT6W37', ': ', array([35, 1, 2, 1]), ' ', array([ 0.8974359 , 0.02564103, 0.05128205, 0.02564103]), ' ', array([ 1., 0., 0., 0.])), ('HT6W45', ': ', array([40, 0, 1, 0]), ' ', array([ 0.97560976, 0. , 0.02439024, 0. ]), ' ', array([ 1., 0., 0., 0.])), ('HT6W47', ': ', array([35, 0, 0, 0]), ' ', array([ 1., 0., 0., 0.]), ' ', array([ 1., 0., 0., 0.])), ('HT6W48', ': ', array([38, 0, 0, 1]), ' '…	100010	0.967712	0.492967	1	1
4	1	20436959	GATxGAG	C	T	[('HT6W37', ': ', array([ 0, 0, 39, 0]), ' ', array([ 0., 0., 1., 0.]), ' ', array([ 0., 0., 1., 0.])), ('HT6W45', ': ', array([ 0, 0, 37, 1]), ' ', array([ 0. , 0. , 0.97368421, 0.02631579]), ' ', array([ 0., 0., 1., 0.])), ('HT6W47', ': ', array([ 0, 1, 48, 0]), ' ', array([ 0. , 0.02040816, 0.97959184, 0. ]), ' ', array([ 0., 0., 1., 0.])), ('HT6W48', ': ', array([ 0, 0, 25, 0]), ' ', array([ …	10110010	0.991983	0.444149	1	1
5	1	20636864	AAAxTGA	A	C	[('HT6W37', ': ', array([44, 0, 0, 0]), ' ', array([ 1., 0., 0., 0.]), ' ', array([ 1., 0., 0., 0.])), ('HT6W45', ': ', array([34, 0, 1, 0]), ' ', array([ 0.97142857, 0. , 0.02857143, 0. ]), ' ', array([ 1., 0., 0., 0.])), ('HT6W47', ': ', array([44, 0, 0, 0]), ' ', array([ 1., 0., 0., 0.]), ' ', array([ 1., 0., 0., 0.])), ('HT6W48', ': ', array([40, 0, 1, 0]), ' ', array([ 0.97560976, 0. , 0.024…	100010	0.983664	0.513158	1	1
6	1	41783047	GAGxACC	A	G	[('HT6W37', ': ', array([38, 0, 0, 0]), ' ', array([ 1., 0., 0., 0.]), ' ', array([ 1., 0., 0., 0.])), ('HT6W45', ': ', array([38, 0, 0, 0]), ' ', array([ 1., 0., 0., 0.]), ' ', array([ 1., 0., 0., 0.])), ('HT6W47', ': ', array([37, 0, 0, 0]), ' ', array([ 1., 0., 0., 0.]), ' ', array([ 1., 0., 0., 0.])), ('HT6W48', ': ', array([51, 0, 0, 0]), ' ', array([ 1., 0., 0., 0.]), ' ', array([ 1., 0., 0…	10110010	0.993031	0.511832	1	1
7	1	52629866	AAAxACA	G	T	[('HT6W37', ': ', array([ 0, 0, 1, 45]), ' ', array([ 0. , 0. , 0.02173913, 0.97826087]), ' ', array([ 0., 0., 0., 1.])), ('HT6W45', ': ', array([ 0, 0, 0, 26]), ' ', array([ 0., 0., 0., 1.]), ' ', array([ 0., 0., 0., 1.])), ('HT6W47', ': ', array([ 1, 0, 0, 31]), ' ', array([ 0.03125, 0. , 0. , 0.96875]), ' ', array([ 0., 0., 0., 1.])), ('HT6W48', ': ', array([ 0, 0, 0, 37]), ' ', array([ 0., 0.…	10110010	0.978114	0.476162	1	1
8	1	52784119	ACAxGCT	A	C	[('HT6W37', ': ', array([48, 0, 0, 0]), ' ', array([ 1., 0., 0., 0.]), ' ', array([ 1., 0., 0., 0.])), ('HT6W45', ': ', array([28, 0, 0, 0]), ' ', array([ 1., 0., 0., 0.]), ' ', array([ 1., 0., 0., 0.])), ('HT6W47', ': ', array([46, 0, 2, 0]), ' ', array([ 0.95833333, 0. , 0.04166667, 0. ]), ' ', array([ 1., 0., 0., 0.])), ('HT6W48', ': ', array([32, 0, 0, 0]), ' ', array([ 1., 0., 0., 0.]), ' ',…	10110010	0.980934	0.488092	1	1
9	1	59586931	ATAxGTT	G	T	[('HT6W37', ': ', array([ 0, 0, 0, 33]), ' ', array([ 0., 0., 0., 1.]), ' ', array([ 0., 0., 0., 1.])), ('HT6W45', ': ', array([ 1, 1, 0, 38]), ' ', array([ 0.025, 0.025, 0. , 0.95 ]), ' ', array([ 0., 0., 0., 1.])), ('HT6W47', ': ', array([ 0, 0, 0, 50]), ' ', array([ 0., 0., 0., 1.]), ' ', array([ 0., 0., 0., 1.])), ('HT6W48', ': ', array([ 0, 1, 0, 41]), ' ', array([ 0. , 0.02380952, 0. , 0.97…	10110010	0.991104	0.479025	1	1
10	1	60348578	TGTxTTC	C	T	[('HT6W37', ': ', array([ 0, 0, 41, 0]), ' ', array([ 0., 0., 1., 0.]), ' ', array([ 0., 0., 1., 0.])), ('HT6W45', ': ', array([ 0, 0, 37, 0]), ' ', array([ 0., 0., 1., 0.]), ' ', array([ 0., 0., 1., 0.])), ('HT6W47', ': ', array([ 0, 0, 30, 0]), ' ', array([ 0., 0., 1., 0.]), ' ', array([ 0., 0., 1., 0.])), ('HT6W48', ': ', array([ 0, 0, 36, 0]), ' ', array([ 0., 0., 1., 0.]), ' ', array([ 0., 0…	100010	0.993441	0.498626	1	1
11	1	65894864	CTGxTTT	C	A	[('HT6W37', ': ', array([ 0, 0, 43, 0]), ' ', array([ 0., 0., 1., 0.]), ' ', array([ 0., 0., 1., 0.])), ('HT6W45', ': ', array([ 0, 0, 28, 0]), ' ', array([ 0., 0., 1., 0.]), ' ', array([ 0., 0., 1., 0.])), ('HT6W47', ': ', array([ 0, 0, 44, 1]), ' ', array([ 0. , 0. , 0.97777778, 0.02222222]), ' ', array([ 0., 0., 1., 0.])), ('HT6W48', ': ', array([ 0, 0, 31, 0]), ' ', array([ 0., 0., 1., 0.]), …	100010	0.997531	0.454453	1	1
12	1	70262569	GGAxAAT	G	T	[('HT6W37', ': ', array([ 0, 0, 0, 30]), ' ', array([ 0., 0., 0., 1.]), ' ', array([ 0., 0., 0., 1.])), ('HT6W45', ': ', array([ 0, 0, 0, 34]), ' ', array([ 0., 0., 0., 1.]), ' ', array([ 0., 0., 0., 1.])), ('HT6W47', ': ', array([ 0, 0, 0, 53]), ' ', array([ 0., 0., 0., 1.]), ' ', array([ 0., 0., 0., 1.])), ('HT6W48', ': ', array([ 0, 0, 0, 36]), ' ', array([ 0., 0., 0., 1.]), ' ', array([ 0., 0…	10110010	1	0.524356	1	1
13	1	71907524	TCCxATT	A	C	[('HT6W37', ': ', array([48, 0, 0, 0]), ' ', array([ 1., 0., 0., 0.]), ' ', array([ 1., 0., 0., 0.])), ('HT6W45', ': ', array([40, 0, 0, 0]), ' ', array([ 1., 0., 0., 0.]), ' ', array([ 1., 0., 0., 0.])), ('HT6W47', ': ', array([51, 0, 0, 0]), ' ', array([ 1., 0., 0., 0.]), ' ', array([ 1., 0., 0., 0.])), ('HT6W48', ': ', array([44, 0, 0, 0]), ' ', array([ 1., 0., 0., 0.]), ' ', array([ 1., 0., 0…	10110010	1	0.510725	1	1
14	1	74071471	ATGxTGA	T	C	[('HT6W37', ': ', array([ 0, 36, 0, 0]), ' ', array([ 0., 1., 0., 0.]), ' ', array([ 0., 1., 0., 0.])), ('HT6W45', ': ', array([ 0, 39, 0, 0]), ' ', array([ 0., 1., 0., 0.]), ' ', array([ 0., 1., 0., 0.])), ('HT6W47', ': ', array([ 0, 39, 0, 1]), ' ', array([ 0. , 0.975, 0. , 0.025]), ' ', array([ 0., 1., 0., 0.])), ('HT6W48', ': ', array([ 0, 50, 1, 0]), ' ', array([ 0. , 0.98039216, 0.01960784,…	10110010	0.989426	0.50323	1	1
15	1	83151702	ATTxGAA	T	G	[('HT6W37', ': ', array([ 0, 29, 1, 0]), ' ', array([ 0. , 0.96666667, 0.03333333, 0. ]), ' ', array([ 0., 1., 0., 0.])), ('HT6W45', ': ', array([ 0, 44, 0, 0]), ' ', array([ 0., 1., 0., 0.]), ' ', array([ 0., 1., 0., 0.])), ('HT6W47', ': ', array([ 0, 40, 1, 0]), ' ', array([ 0. , 0.97560976, 0.02439024, 0. ]), ' ', array([ 0., 1., 0., 0.])), ('HT6W48', ': ', array([ 0, 49, 0, 0]), ' ', array([ …	100010	0.988017	0.512681	1	1
16	1	85596418	GGGxTAG	G	T	[('HT6W37', ': ', array([ 0, 1, 0, 39]), ' ', array([ 0. , 0.025, 0. , 0.975]), ' ', array([ 0., 0., 0., 1.])), ('HT6W45', ': ', array([ 0, 0, 0, 41]), ' ', array([ 0., 0., 0., 1.]), ' ', array([ 0., 0., 0., 1.])), ('HT6W47', ': ', array([ 0, 1, 0, 46]), ' ', array([ 0. , 0.0212766, 0. , 0.9787234]), ' ', array([ 0., 0., 0., 1.])), ('HT6W48', ': ', array([ 0, 0, 0, 52]), ' ', array([ 0., 0., 0., …	10110010	0.986586	0.532653	1	1
17	1	91485129	GTTxTTT	T	G	[('HT6W37', ': ', array([ 0, 35, 0, 0]), ' ', array([ 0., 1., 0., 0.]), ' ', array([ 0., 1., 0., 0.])), ('HT6W45', ': ', array([ 0, 49, 0, 0]), ' ', array([ 0., 1., 0., 0.]), ' ', array([ 0., 1., 0., 0.])), ('HT6W47', ': ', array([ 0, 49, 0, 1]), ' ', array([ 0. , 0.98, 0. , 0.02]), ' ', array([ 0., 1., 0., 0.])), ('HT6W48', ': ', array([ 0, 45, 0, 0]), ' ', array([ 0., 1., 0., 0.]), ' ', array([…	100010	0.994603	0.519022	1	1
18	1	96701036	ACGxACT	T	C	[('HT6W37', ': ', array([ 0, 41, 0, 0]), ' ', array([ 0., 1., 0., 0.]), ' ', array([ 0., 1., 0., 0.])), ('HT6W45', ': ', array([ 0, 35, 0, 1]), ' ', array([ 0. , 0.97222222, 0. , 0.02777778]), ' ', array([ 0., 1., 0., 0.])), ('HT6W47', ': ', array([ 0, 53, 1, 1]), ' ', array([ 0. , 0.96363636, 0.01818182, 0.01818182]), ' ', array([ 0., 1., 0., 0.])), ('HT6W48', ': ', array([ 0, 35, 0, 0]), ' ', a…	100010	0.99596	0.559524	1	1
19	1	97610651	AACxTAC	G	A	[('HT6W37', ': ', array([ 0, 0, 0, 32]), ' ', array([ 0., 0., 0., 1.]), ' ', array([ 0., 0., 0., 1.])), ('HT6W45', ': ', array([ 0, 0, 0, 41]), ' ', array([ 0., 0., 0., 1.]), ' ', array([ 0., 0., 0., 1.])), ('HT6W47', ': ', array([ 0, 0, 0, 52]), ' ', array([ 0., 0., 0., 1.]), ' ', array([ 0., 0., 0., 1.])), ('HT6W48', ': ', array([ 0, 0, 2, 36]), ' ', array([ 0. , 0. , 0.05263158, 0.94736842]), …	10110010	0.989442	0.483724	1	1
20	1	102179768	AAAxAAA	A	C	[('HT6W37', ': ', array([37, 0, 0, 0]), ' ', array([ 1., 0., 0., 0.]), ' ', array([ 1., 0., 0., 0.])), ('HT6W45', ': ', array([30, 0, 0, 0]), ' ', array([ 1., 0., 0., 0.]), ' ', array([ 1., 0., 0., 0.])), ('HT6W47', ': ', array([41, 0, 0, 0]), ' ', array([ 1., 0., 0., 0.]), ' ', array([ 1., 0., 0., 0.])), ('HT6W48', ': ', array([42, 0, 1, 0]), ' ', array([ 0.97674419, 0. , 0.02325581, 0. ]), ' ',…	10110010	0.990067	0.469048	1	1
21	1	103221479	AGCxTTA	T	G	[('HT6W37', ': ', array([ 0, 42, 0, 0]), ' ', array([ 0., 1., 0., 0.]), ' ', array([ 0., 1., 0., 0.])), ('HT6W45', ': ', array([ 0, 37, 0, 0]), ' ', array([ 0., 1., 0., 0.]), ' ', array([ 0., 1., 0., 0.])), ('HT6W47', ': ', array([ 0, 50, 0, 0]), ' ', array([ 0., 1., 0., 0.]), ' ', array([ 0., 1., 0., 0.])), ('HT6W48', ': ', array([ 0, 44, 0, 0]), ' ', array([ 0., 1., 0., 0.]), ' ', array([ 0., 1…	100010	0.995148	0.438636	1	1
22	1	106621245	AGAxATG	G	A	[('HT6W37', ': ', array([ 0, 0, 0, 38]), ' ', array([ 0., 0., 0., 1.]), ' ', array([ 0., 0., 0., 1.])), ('HT6W45', ': ', array([ 0, 0, 0, 27]), ' ', array([ 0., 0., 0., 1.]), ' ', array([ 0., 0., 0., 1.])), ('HT6W47', ': ', array([ 0, 0, 1, 29]), ' ', array([ 0. , 0. , 0.03333333, 0.96666667]), ' ', array([ 0., 0., 0., 1.])), ('HT6W48', ': ', array([ 0, 0, 0, 38]), ' ', array([ 0., 0., 0., 1.]), …	10110010	0.992323	0.538764	1	1
23	1	106727057	AGAxGGA	G	T	[('HT6W37', ': ', array([ 0, 0, 0, 37]), ' ', array([ 0., 0., 0., 1.]), ' ', array([ 0., 0., 0., 1.])), ('HT6W45', ': ', array([ 0, 0, 0, 41]), ' ', array([ 0., 0., 0., 1.]), ' ', array([ 0., 0., 0., 1.])), ('HT6W47', ': ', array([ 0, 0, 0, 42]), ' ', array([ 0., 0., 0., 1.]), ' ', array([ 0., 0., 0., 1.])), ('HT6W48', ': ', array([ 0, 0, 0, 41]), ' ', array([ 0., 0., 0., 1.]), ' ', array([ 0., 0…	10110010	1	0.513672	1	1
24	1	111370246	AAAxACG	G	T	[('HT6W37', ': ', array([ 0, 0, 0, 36]), ' ', array([ 0., 0., 0., 1.]), ' ', array([ 0., 0., 0., 1.])), ('HT6W45', ': ', array([ 0, 0, 1, 41]), ' ', array([ 0. , 0. , 0.02380952, 0.97619048]), ' ', array([ 0., 0., 0., 1.])), ('HT6W47', ': ', array([ 0, 0, 0, 49]), ' ', array([ 0., 0., 0., 1.]), ' ', array([ 0., 0., 0., 1.])), ('HT6W48', ': ', array([ 0, 0, 0, 51]), ' ', array([ 0., 0., 0., 1.]), …	10110010	0.995074	0.482029	1	1
25	1	112408462	TGAxACT	G	T	[('HT6W37', ': ', array([ 0, 0, 0, 44]), ' ', array([ 0., 0., 0., 1.]), ' ', array([ 0., 0., 0., 1.])), ('HT6W45', ': ', array([ 0, 1, 0, 46]), ' ', array([ 0. , 0.0212766, 0. , 0.9787234]), ' ', array([ 0., 0., 0., 1.])), ('HT6W47', ': ', array([ 0, 0, 0, 29]), ' ', array([ 0., 0., 0., 1.]), ' ', array([ 0., 0., 0., 1.])), ('HT6W48', ': ', array([ 0, 0, 0, 35]), ' ', array([ 0., 0., 0., 1.]), ' …	10110010	1	0.522915	1	1
26	1	117529655	GTGxTAT	A	C	[('HT6W37', ': ', array([34, 0, 0, 1]), ' ', array([ 0.97142857, 0. , 0. , 0.02857143]), ' ', array([ 1., 0., 0., 0.])), ('HT6W45', ': ', array([45, 0, 0, 0]), ' ', array([ 1., 0., 0., 0.]), ' ', array([ 1., 0., 0., 0.])), ('HT6W47', ': ', array([44, 0, 0, 0]), ' ', array([ 1., 0., 0., 0.]), ' ', array([ 1., 0., 0., 0.])), ('HT6W48', ': ', array([34, 0, 0, 0]), ' ', array([ 1., 0., 0., 0.]), ' ',…	100010	0.987533	0.428458	1	1
27	1	120769362	GATxGTG	C	T	[('HT6W37', ': ', array([ 0, 0, 42, 0]), ' ', array([ 0., 0., 1., 0.]), ' ', array([ 0., 0., 1., 0.])), ('HT6W45', ': ', array([ 0, 0, 29, 0]), ' ', array([ 0., 0., 1., 0.]), ' ', array([ 0., 0., 1., 0.])), ('HT6W47', ': ', array([ 0, 1, 47, 0]), ' ', array([ 0. , 0.02083333, 0.97916667, 0. ]), ' ', array([ 0., 0., 1., 0.])), ('HT6W48', ': ', array([ 0, 0, 37, 0]), ' ', array([ 0., 0., 1., 0.]), …	100010	0.991667	0.55211	1	1
28	1	150063913	TGAxTTA	C	A	[('HT6W37', ': ', array([ 0, 0, 34, 0]), ' ', array([ 0., 0., 1., 0.]), ' ', array([ 0., 0., 1., 0.])), ('HT6W45', ': ', array([ 0, 0, 37, 0]), ' ', array([ 0., 0., 1., 0.]), ' ', array([ 0., 0., 1., 0.])), ('HT6W47', ': ', array([ 0, 0, 55, 0]), ' ', array([ 0., 0., 1., 0.]), ' ', array([ 0., 0., 1., 0.])), ('HT6W48', ': ', array([ 0, 1, 47, 0]), ' ', array([ 0. , 0.02083333, 0.97916667, 0. ]), …	100010	0.987447	0.501438	1	1
29	1	156138618	TCAxTTT	G	T	[('HT6W37', ': ', array([ 0, 0, 0, 39]), ' ', array([ 0., 0., 0., 1.]), ' ', array([ 0., 0., 0., 1.])), ('HT6W45', ': ', array([ 1, 0, 0, 30]), ' ', array([ 0.03225806, 0. , 0. , 0.96774194]), ' ', array([ 0., 0., 0., 1.])), ('HT6W47', ': ', array([ 0, 0, 0, 35]), ' ', array([ 0., 0., 0., 1.]), ' ', array([ 0., 0., 0., 1.])), ('HT6W48', ': ', array([ 0, 0, 0, 40]), ' ', array([ 0., 0., 0., 1.]), …	10110010	0.997768	0.487109	1	1
30	1	160953548	TTTxTTT	T	C	[('HT6W37', ': ', array([ 0, 31, 0, 0]), ' ', array([ 0., 1., 0., 0.]), ' ', array([ 0., 1., 0., 0.])), ('HT6W45', ': ', array([ 0, 27, 0, 0]), ' ', array([ 0., 1., 0., 0.]), ' ', array([ 0., 1., 0., 0.])), ('HT6W47', ': ', array([ 0, 37, 1, 0]), ' ', array([ 0. , 0.97368421, 0.02631579, 0. ]), ' ', array([ 0., 1., 0., 0.])), ('HT6W48', ': ', array([ 0, 30, 0, 0]), ' ', array([ 0., 1., 0., 0.]), …	10110010	0.992839	0.521961	1	1
31	1	161896274	GCTxACA	C	T	[('HT6W37', ': ', array([ 0, 0, 42, 0]), ' ', array([ 0., 0., 1., 0.]), ' ', array([ 0., 0., 1., 0.])), ('HT6W45', ': ', array([ 0, 0, 30, 0]), ' ', array([ 0., 0., 1., 0.]), ' ', array([ 0., 0., 1., 0.])), ('HT6W47', ': ', array([ 0, 0, 32, 0]), ' ', array([ 0., 0., 1., 0.]), ' ', array([ 0., 0., 1., 0.])), ('HT6W48', ': ', array([ 0, 0, 37, 0]), ' ', array([ 0., 0., 1., 0.]), ' ', array([ 0., 0…	100010	0.996732	0.444519	1	1
32	1	178405942	CTAxACT	A	G	[('HT6W37', ': ', array([36, 0, 0, 0]), ' ', array([ 1., 0., 0., 0.]), ' ', array([ 1., 0., 0., 0.])), ('HT6W45', ': ', array([29, 0, 0, 1]), ' ', array([ 0.96666667, 0. , 0. , 0.03333333]), ' ', array([ 1., 0., 0., 0.])), ('HT6W47', ': ', array([43, 0, 1, 0]), ' ', array([ 0.97727273, 0. , 0.02272727, 0. ]), ' ', array([ 1., 0., 0., 0.])), ('HT6W48', ': ', array([36, 0, 0, 0]), ' ', array([ 1., …	100010	0.992157	0.502801	1	1
33	1	179629765	TTTxTAC	T	C	[('HT6W37', ': ', array([ 0, 33, 0, 0]), ' ', array([ 0., 1., 0., 0.]), ' ', array([ 0., 1., 0., 0.])), ('HT6W45', ': ', array([ 0, 39, 0, 0]), ' ', array([ 0., 1., 0., 0.]), ' ', array([ 0., 1., 0., 0.])), ('HT6W47', ': ', array([ 0, 48, 0, 0]), ' ', array([ 0., 1., 0., 0.]), ' ', array([ 0., 1., 0., 0.])), ('HT6W48', ': ', array([ 1, 40, 0, 0]), ' ', array([ 0.02439024, 0.97560976, 0. , 0. ]), …	100010	0.989936	0.592995	1	1
34	1	193775001	AGCxCTA	C	T	[('HT6W37', ': ', array([ 0, 0, 49, 0]), ' ', array([ 0., 0., 1., 0.]), ' ', array([ 0., 0., 1., 0.])), ('HT6W45', ': ', array([ 0, 0, 27, 1]), ' ', array([ 0. , 0. , 0.96428571, 0.03571429]), ' ', array([ 0., 0., 1., 0.])), ('HT6W47', ': ', array([ 0, 0, 56, 0]), ' ', array([ 0., 0., 1., 0.]), ' ', array([ 0., 0., 1., 0.])), ('HT6W48', ': ', array([ 0, 0, 36, 0]), ' ', array([ 0., 0., 1., 0.]), …	10110010	0.992813	0.567675	1	1
35	1	194562802	TGTxTTG	T	G	[('HT6W37', ': ', array([ 0, 35, 1, 0]), ' ', array([ 0. , 0.97222222, 0.02777778, 0. ]), ' ', array([ 0., 1., 0., 0.])), ('HT6W45', ': ', array([ 0, 40, 0, 0]), ' ', array([ 0., 1., 0., 0.]), ' ', array([ 0., 1., 0., 0.])), ('HT6W47', ': ', array([ 0, 46, 0, 0]), ' ', array([ 0., 1., 0., 0.]), ' ', array([ 0., 1., 0., 0.])), ('HT6W48', ': ', array([ 0, 32, 0, 0]), ' ', array([ 0., 1., 0., 0.]), …	100010	0.996914	0.46875	1	1
36	1	196133175	TGTxACA	G	A	[('HT6W37', ': ', array([ 0, 0, 1, 39]), ' ', array([ 0. , 0. , 0.025, 0.975]), ' ', array([ 0., 0., 0., 1.])), ('HT6W45', ': ', array([ 0, 0, 0, 41]), ' ', array([ 0., 0., 0., 1.]), ' ', array([ 0., 0., 0., 1.])), ('HT6W47', ': ', array([ 0, 0, 0, 33]), ' ', array([ 0., 0., 0., 1.]), ' ', array([ 0., 0., 0., 1.])), ('HT6W48', ': ', array([ 0, 0, 0, 42]), ' ', array([ 0., 0., 0., 1.]), ' ', array…	100010	0.993638	0.464694	1	1
37	1	198618276	AAAxTAT	T	G	[('HT6W37', ': ', array([ 0, 37, 0, 0]), ' ', array([ 0., 1., 0., 0.]), ' ', array([ 0., 1., 0., 0.])), ('HT6W45', ': ', array([ 0, 30, 0, 0]), ' ', array([ 0., 1., 0., 0.]), ' ', array([ 0., 1., 0., 0.])), ('HT6W47', ': ', array([ 1, 35, 0, 0]), ' ', array([ 0.02777778, 0.97222222, 0. , 0. ]), ' ', array([ 0., 1., 0., 0.])), ('HT6W48', ': ', array([ 0, 38, 0, 1]), ' ', array([ 0. , 0.97435897, 0…	100010	0.994065	0.448276	1	1
38	1	199184471	AGTxTAT	T	G	[('HT6W37', ': ', array([ 0, 36, 0, 0]), ' ', array([ 0. , 0.97297297, 0. , 0. ]), ' ', array([ 0., 1., 0., 0.])), ('HT6W45', ': ', array([ 0, 31, 0, 1]), ' ', array([ 0. , 0.96875, 0. , 0.03125]), ' ', array([ 0., 1., 0., 0.])), ('HT6W47', ': ', array([ 0, 48, 0, 1]), ' ', array([ 0. , 0.97959184, 0. , 0.02040816]), ' ', array([ 0., 1., 0., 0.])), ('HT6W48', ': ', array([ 0, 38, 0, 0]), ' ', arr…	100010	0.990016	0.51756	1	1
39	1	210204930	ATAxATA	G	T	[('HT6W37', ': ', array([ 1, 0, 0, 37]), ' ', array([ 0.02631579, 0. , 0. , 0.97368421]), ' ', array([ 0., 0., 0., 1.])), ('HT6W45', ': ', array([ 0, 0, 0, 32]), ' ', array([ 0., 0., 0., 1.]), ' ', array([ 0., 0., 0., 1.])), ('HT6W47', ': ', array([ 0, 0, 0, 48]), ' ', array([ 0., 0., 0., 1.]), ' ', array([ 0., 0., 0., 1.])), ('HT6W48', ': ', array([ 0, 0, 0, 46]), ' ', array([ 0., 0., 0., 1.]), …	10110010	0.98828	0.449673	1	1
40	1	211368414	GCGxCCA	A	G	[('HT6W37', ': ', array([39, 0, 0, 0]), ' ', array([ 1., 0., 0., 0.]), ' ', array([ 1., 0., 0., 0.])), ('HT6W45', ': ', array([36, 0, 0, 0]), ' ', array([ 1., 0., 0., 0.]), ' ', array([ 1., 0., 0., 0.])), ('HT6W47', ': ', array([48, 0, 0, 0]), ' ', array([ 1., 0., 0., 0.]), ' ', array([ 1., 0., 0., 0.])), ('HT6W48', ': ', array([38, 0, 2, 0]), ' ', array([ 0.95, 0. , 0.05, 0. ]), ' ', array([ 1.,…	100010	0.992681	0.443994	1	1
41	1	213928292	TATxTTT	C	A	[('HT6W37', ': ', array([ 0, 1, 40, 0]), ' ', array([ 0. , 0.02439024, 0.97560976, 0. ]), ' ', array([ 0., 0., 1., 0.])), ('HT6W45', ': ', array([ 1, 0, 42, 0]), ' ', array([ 0.02325581, 0. , 0.97674419, 0. ]), ' ', array([ 0., 0., 1., 0.])), ('HT6W47', ': ', array([ 0, 0, 51, 0]), ' ', array([ 0., 0., 1., 0.]), ' ', array([ 0., 0., 1., 0.])), ('HT6W48', ': ', array([ 1, 0, 43, 0]), ' ', array([ …	100010	0.994765	0.413399	1	1
42	1	219357493	TAGxTGC	A	G	[('HT6W37', ': ', array([38, 0, 0, 0]), ' ', array([ 1., 0., 0., 0.]), ' ', array([ 1., 0., 0., 0.])), ('HT6W45', ': ', array([43, 0, 0, 0]), ' ', array([ 1., 0., 0., 0.]), ' ', array([ 1., 0., 0., 0.])), ('HT6W47', ': ', array([40, 0, 0, 0]), ' ', array([ 1., 0., 0., 0.]), ' ', array([ 1., 0., 0., 0.])), ('HT6W48', ': ', array([45, 0, 0, 0]), ' ', array([ 1., 0., 0., 0.]), ' ', array([ 1., 0., 0…	100010	0.993934	0.474359	1	1
43	1	221383609	CAAxAAA	G	T	[('HT6W37', ': ', array([ 0, 0, 0, 42]), ' ', array([ 0., 0., 0., 1.]), ' ', array([ 0., 0., 0., 1.])), ('HT6W45', ': ', array([ 0, 0, 0, 33]), ' ', array([ 0., 0., 0., 1.]), ' ', array([ 0., 0., 0., 1.])), ('HT6W47', ': ', array([ 0, 1, 0, 33]), ' ', array([ 0. , 0.02941176, 0. , 0.97058824]), ' ', array([ 0., 0., 0., 1.])), ('HT6W48', ': ', array([ 1, 0, 0, 36]), ' ', array([ 0.02702703, 0. , 0…	10110010	0.987608	0.498959	1	1
44	1	239907304	GGTxTTG	C	A	[('HT6W37', ': ', array([ 0, 0, 26, 0]), ' ', array([ 0., 0., 1., 0.]), ' ', array([ 0., 0., 1., 0.])), ('HT6W45', ': ', array([ 0, 0, 34, 0]), ' ', array([ 0., 0., 1., 0.]), ' ', array([ 0., 0., 1., 0.])), ('HT6W47', ': ', array([ 0, 1, 37, 0]), ' ', array([ 0. , 0.02631579, 0.97368421, 0. ]), ' ', array([ 0., 0., 1., 0.])), ('HT6W48', ': ', array([ 0, 0, 36, 1]), ' ', array([ 0. , 0. , 0.972972…	100010	0.988709	0.539752	1	1
45	1	248472583	TTTxGGA	T	C	[('HT6W37', ': ', array([ 0, 44, 0, 0]), ' ', array([ 0., 1., 0., 0.]), ' ', array([ 0., 1., 0., 0.])), ('HT6W45', ': ', array([ 0, 31, 0, 0]), ' ', array([ 0., 1., 0., 0.]), ' ', array([ 0., 1., 0., 0.])), ('HT6W47', ': ', array([ 0, 34, 0, 0]), ' ', array([ 0., 1., 0., 0.]), ' ', array([ 0., 1., 0., 0.])), ('HT6W48', ': ', array([ 0, 60, 0, 0]), ' ', array([ 0., 1., 0., 0.]), ' ', array([ 0., 1…	100010	1	0.393869	1	1
46	2	390265	TATxCGT	A	G	[('HT6W37', ': ', array([33, 1, 0, 0]), ' ', array([ 0.97058824, 0.02941176, 0. , 0. ]), ' ', array([ 1., 0., 0., 0.])), ('HT6W45', ': ', array([34, 0, 0, 0]), ' ', array([ 1., 0., 0., 0.]), ' ', array([ 1., 0., 0., 0.])), ('HT6W47', ': ', array([47, 0, 0, 1]), ' ', array([ 0.97916667, 0. , 0. , 0.02083333]), ' ', array([ 1., 0., 0., 0.])), ('HT6W48', ': ', array([42, 0, 0, 1]), ' ', array([ 0.97…	100010	0.986773	0.433914	1	1
47	2	1800474	CCGxGCC	A	G	[('HT6W37', ': ', array([39, 0, 0, 0]), ' ', array([ 1., 0., 0., 0.]), ' ', array([ 1., 0., 0., 0.])), ('HT6W45', ': ', array([27, 0, 0, 0]), ' ', array([ 1., 0., 0., 0.]), ' ', array([ 1., 0., 0., 0.])), ('HT6W47', ': ', array([40, 0, 1, 0]), ' ', array([ 0.97560976, 0. , 0.02439024, 0. ]), ' ', array([ 1., 0., 0., 0.])), ('HT6W48', ': ', array([36, 0, 2, 0]), ' ', array([ 0.94736842, 0. , 0.052…	100010	0.969357	0.531707	1	1
48	2	3082960	TATxCAT	T	G	[('HT6W37', ': ', array([ 0, 21, 0, 0]), ' ', array([ 0., 1., 0., 0.]), ' ', array([ 0., 1., 0., 0.])), ('HT6W45', ': ', array([ 0, 21, 1, 0]), ' ', array([ 0. , 0.95454545, 0.04545455, 0. ]), ' ', array([ 0., 1., 0., 0.])), ('HT6W47', ': ', array([ 0, 37, 0, 0]), ' ', array([ 0., 1., 0., 0.]), ' ', array([ 0., 1., 0., 0.])), ('HT6W48', ': ', array([ 0, 37, 0, 0]), ' ', array([ 0., 1., 0., 0.]), …	100010	1	0.540012	1	1
49	2	5868619	AGAxTAG	A	T	[('HT6W37', ': ', array([26, 0, 0, 0]), ' ', array([ 1., 0., 0., 0.]), ' ', array([ 1., 0., 0., 0.])), ('HT6W45', ': ', array([52, 0, 0, 0]), ' ', array([ 1., 0., 0., 0.]), ' ', array([ 1., 0., 0., 0.])), ('HT6W47', ': ', array([37, 0, 0, 0]), ' ', array([ 1., 0., 0., 0.]), ' ', array([ 1., 0., 0., 0.])), ('HT6W48', ': ', array([44, 0, 1, 0]), ' ', array([ 0.97777778, 0. , 0.02222222, 0. ]), ' ',…	10110010	0.990646	0.488065	1	1
50	2	7053394	GCCxGTG	G	T	[('HT6W37', ': ', array([ 0, 0, 0, 39]), ' ', array([ 0., 0., 0., 1.]), ' ', array([ 0., 0., 0., 1.])), ('HT6W45', ': ', array([ 0, 0, 0, 32]), ' ', array([ 0., 0., 0., 1.]), ' ', array([ 0., 0., 0., 1.])), ('HT6W47', ': ', array([ 0, 1, 1, 47]), ' ', array([ 0. , 0.02040816, 0.02040816, 0.95918367]), ' ', array([ 0., 0., 0., 1.])), ('HT6W48', ': ', array([ 0, 0, 0, 29]), ' ', array([ 0., 0., 0.,…	100010	0.993243	0.485525	1	1
51	2	14062053	TACxTCA	T	G	[('HT6W37', ': ', array([ 0, 32, 0, 0]), ' ', array([ 0., 1., 0., 0.]), ' ', array([ 0., 1., 0., 0.])), ('HT6W45', ': ', array([ 0, 39, 0, 1]), ' ', array([ 0. , 0.975, 0. , 0.025]), ' ', array([ 0., 1., 0., 0.])), ('HT6W47', ': ', array([ 0, 37, 0, 0]), ' ', array([ 0., 1., 0., 0.]), ' ', array([ 0., 1., 0., 0.])), ('HT6W48', ': ', array([ 0, 48, 0, 0]), ' ', array([ 0., 1., 0., 0.]), ' ', array…	100010	0.994836	0.535897	1	1
52	2	16975497	GAAxTAT	T	G	[('HT6W37', ': ', array([ 0, 30, 0, 0]), ' ', array([ 0., 1., 0., 0.]), ' ', array([ 0., 1., 0., 0.])), ('HT6W45', ': ', array([ 0, 27, 0, 0]), ' ', array([ 0., 1., 0., 0.]), ' ', array([ 0., 1., 0., 0.])), ('HT6W47', ': ', array([ 0, 27, 0, 1]), ' ', array([ 0. , 0.96428571, 0. , 0.03571429]), ' ', array([ 0., 1., 0., 0.])), ('HT6W48', ': ', array([ 0, 37, 0, 1]), ' ', array([ 0. , 0.97368421, 0…	10110010	0.977379	0.503589	1	1
53	2	21089104	CCCxCCT	G	A	[('HT6W37', ': ', array([ 0, 0, 2, 28]), ' ', array([ 0. , 0. , 0.06666667, 0.93333333]), ' ', array([ 0., 0., 0., 1.])), ('HT6W45', ': ', array([ 0, 0, 1, 36]), ' ', array([ 0. , 0. , 0.02702703, 0.97297297]), ' ', array([ 0., 0., 0., 1.])), ('HT6W47', ': ', array([ 0, 0, 0, 40]), ' ', array([ 0., 0., 0., 1.]), ' ', array([ 0., 0., 0., 1.])), ('HT6W48', ': ', array([ 0, 1, 0, 36]), ' ', array([ …	100010	0.978557	0.475775	1	1
54	2	21344618	CCCxAAG	G	A	[('HT6W37', ': ', array([ 0, 0, 0, 22]), ' ', array([ 0., 0., 0., 1.]), ' ', array([ 0., 0., 0., 1.])), ('HT6W45', ': ', array([ 0, 0, 0, 24]), ' ', array([ 0., 0., 0., 1.]), ' ', array([ 0., 0., 0., 1.])), ('HT6W47', ': ', array([ 0, 0, 0, 55]), ' ', array([ 0., 0., 0., 1.]), ' ', array([ 0., 0., 0., 1.])), ('HT6W48', ': ', array([ 0, 0, 0, 32]), ' ', array([ 0., 0., 0., 1.]), ' ', array([ 0., 0…	100010	1	0.524123	1	1
55	2	31698611	AATxTCC	C	A	[('HT6W37', ': ', array([ 0, 0, 32, 0]), ' ', array([ 0., 0., 1., 0.]), ' ', array([ 0., 0., 1., 0.])), ('HT6W45', ': ', array([ 0, 0, 27, 0]), ' ', array([ 0., 0., 1., 0.]), ' ', array([ 0., 0., 1., 0.])), ('HT6W47', ': ', array([ 1, 0, 42, 0]), ' ', array([ 0.02325581, 0. , 0.97674419, 0. ]), ' ', array([ 0., 0., 1., 0.])), ('HT6W48', ': ', array([ 0, 0, 40, 0]), ' ', array([ 0., 0., 1., 0.]), …	100010	0.997416	0.410079	1	1
56	2	34478540	AGTxCAC	A	T	[('HT6W37', ': ', array([39, 0, 0, 0]), ' ', array([ 1., 0., 0., 0.]), ' ', array([ 1., 0., 0., 0.])), ('HT6W45', ': ', array([38, 0, 0, 0]), ' ', array([ 1., 0., 0., 0.]), ' ', array([ 1., 0., 0., 0.])), ('HT6W47', ': ', array([40, 0, 0, 0]), ' ', array([ 1., 0., 0., 0.]), ' ', array([ 1., 0., 0., 0.])), ('HT6W48', ': ', array([44, 0, 0, 0]), ' ', array([ 1., 0., 0., 0.]), ' ', array([ 1., 0., 0…	10110010	0.992693	0.447145	1	1
57	2	35475095	GCAxGGA	G	A	[('HT6W37', ': ', array([ 0, 0, 1, 24]), ' ', array([ 0. , 0. , 0.04, 0.96]), ' ', array([ 0., 0., 0., 1.])), ('HT6W45', ': ', array([ 0, 0, 0, 20]), ' ', array([ 0., 0., 0., 1.]), ' ', array([ 0., 0., 0., 1.])), ('HT6W47', ': ', array([ 0, 0, 1, 31]), ' ', array([ 0. , 0. , 0.03125, 0.96875]), ' ', array([ 0., 0., 0., 1.])), ('HT6W48', ': ', array([ 0, 0, 0, 34]), ' ', array([ 0., 0., 0., 1.]), …	100010	0.992083	0.522807	1	1
58	2	37814580	AGAxAAT	A	G	[('HT6W37', ': ', array([43, 0, 0, 0]), ' ', array([ 1., 0., 0., 0.]), ' ', array([ 1., 0., 0., 0.])), ('HT6W45', ': ', array([30, 0, 0, 0]), ' ', array([ 1., 0., 0., 0.]), ' ', array([ 1., 0., 0., 0.])), ('HT6W47', ': ', array([40, 0, 0, 0]), ' ', array([ 1., 0., 0., 0.]), ' ', array([ 1., 0., 0., 0.])), ('HT6W48', ': ', array([47, 0, 1, 0]), ' ', array([ 0.97916667, 0. , 0.02083333, 0. ]), ' ',…	100010	0.995589	0.458333	1	1
59	2	40814957	AAAxTTA	G	T	[('HT6W37', ': ', array([ 0, 0, 0, 50]), ' ', array([ 0., 0., 0., 1.]), ' ', array([ 0., 0., 0., 1.])), ('HT6W45', ': ', array([ 0, 1, 0, 31]), ' ', array([ 0. , 0.03125, 0. , 0.96875]), ' ', array([ 0., 0., 0., 1.])), ('HT6W47', ': ', array([ 0, 0, 0, 41]), ' ', array([ 0., 0., 0., 1.]), ' ', array([ 0., 0., 0., 1.])), ('HT6W48', ': ', array([ 0, 0, 0, 37]), ' ', array([ 0., 0., 0., 1.]), ' ', a…	10110010	0.991914	0.498675	1	1
60	2	50146395	AGTxATT	C	A	[('HT6W37', ': ', array([ 0, 0, 41, 0]), ' ', array([ 0., 0., 1., 0.]), ' ', array([ 0., 0., 1., 0.])), ('HT6W45', ': ', array([ 0, 0, 43, 0]), ' ', array([ 0., 0., 1., 0.]), ' ', array([ 0., 0., 1., 0.])), ('HT6W47', ': ', array([ 0, 0, 53, 0]), ' ', array([ 0., 0., 1., 0.]), ' ', array([ 0., 0., 1., 0.])), ('HT6W48', ': ', array([ 0, 0, 24, 0]), ' ', array([ 0., 0., 1., 0.]), ' ', array([ 0., 0…	10110010	0.993838	0.549969	1	1
61	2	53396488	AAGxTAC	T	C	[('HT6W37', ': ', array([ 0, 29, 0, 0]), ' ', array([ 0., 1., 0., 0.]), ' ', array([ 0., 1., 0., 0.])), ('HT6W45', ': ', array([ 0, 38, 0, 0]), ' ', array([ 0., 1., 0., 0.]), ' ', array([ 0., 1., 0., 0.])), ('HT6W47', ': ', array([ 0, 46, 0, 0]), ' ', array([ 0., 1., 0., 0.]), ' ', array([ 0., 1., 0., 0.])), ('HT6W48', ': ', array([ 0, 44, 0, 0]), ' ', array([ 0., 1., 0., 0.]), ' ', array([ 0., 1…	10110010	0.99696	0.521932	1	1
62	2	54713015	CGGxCGC	C	T	[('HT6W37', ': ', array([ 0, 0, 41, 0]), ' ', array([ 0., 0., 1., 0.]), ' ', array([ 0., 0., 1., 0.])), ('HT6W45', ': ', array([ 0, 0, 36, 0]), ' ', array([ 0., 0., 1., 0.]), ' ', array([ 0., 0., 1., 0.])), ('HT6W47', ': ', array([ 0, 1, 45, 0]), ' ', array([ 0. , 0.02173913, 0.97826087, 0. ]), ' ', array([ 0., 0., 1., 0.])), ('HT6W48', ': ', array([ 0, 0, 48, 0]), ' ', array([ 0., 0., 1., 0.]), …	100010	0.993058	0.508408	1	1
63	2	56523315	TCCxACT	C	A	[('HT6W37', ': ', array([ 0, 0, 31, 0]), ' ', array([ 0., 0., 1., 0.]), ' ', array([ 0., 0., 1., 0.])), ('HT6W45', ': ', array([ 0, 0, 33, 0]), ' ', array([ 0., 0., 1., 0.]), ' ', array([ 0., 0., 1., 0.])), ('HT6W47', ': ', array([ 0, 0, 36, 0]), ' ', array([ 0., 0., 1., 0.]), ' ', array([ 0., 0., 1., 0.])), ('HT6W48', ': ', array([ 0, 0, 41, 0]), ' ', array([ 0., 0., 1., 0.]), ' ', array([ 0., 0…	10110010	1	0.544836	1	1
64	2	57490807	AAAxCCT	A	G	[('HT6W37', ': ', array([46, 0, 0, 0]), ' ', array([ 1., 0., 0., 0.]), ' ', array([ 1., 0., 0., 0.])), ('HT6W45', ': ', array([31, 0, 0, 0]), ' ', array([ 1., 0., 0., 0.]), ' ', array([ 1., 0., 0., 0.])), ('HT6W47', ': ', array([32, 0, 1, 0]), ' ', array([ 0.96969697, 0. , 0.03030303, 0. ]), ' ', array([ 1., 0., 0., 0.])), ('HT6W48', ': ', array([41, 0, 0, 0]), ' ', array([ 1., 0., 0., 0.]), ' ',…	100010	0.984833	0.439024	1	1
65	2	57914074	ATTxGAA	T	C	[('HT6W37', ': ', array([ 0, 46, 0, 0]), ' ', array([ 0., 1., 0., 0.]), ' ', array([ 0., 1., 0., 0.])), ('HT6W45', ': ', array([ 0, 29, 0, 0]), ' ', array([ 0., 1., 0., 0.]), ' ', array([ 0., 1., 0., 0.])), ('HT6W47', ': ', array([ 2, 46, 0, 0]), ' ', array([ 0.04166667, 0.95833333, 0. , 0. ]), ' ', array([ 0., 1., 0., 0.])), ('HT6W48', ': ', array([ 0, 34, 1, 0]), ' ', array([ 0. , 0.97142857, 0…	100010	0.952827	0.524845	1	1
66	2	62502593	ATCxGAT	T	G	[('HT6W37', ': ', array([ 0, 34, 0, 0]), ' ', array([ 0., 1., 0., 0.]), ' ', array([ 0., 1., 0., 0.])), ('HT6W45', ': ', array([ 0, 52, 0, 0]), ' ', array([ 0., 1., 0., 0.]), ' ', array([ 0., 1., 0., 0.])), ('HT6W47', ': ', array([ 0, 36, 0, 0]), ' ', array([ 0., 1., 0., 0.]), ' ', array([ 0., 1., 0., 0.])), ('HT6W48', ': ', array([ 0, 29, 0, 0]), ' ', array([ 0., 1., 0., 0.]), ' ', array([ 0., 1…	100010	0.99177	0.526667	1	1
67	2	66857447	CATxTTT	C	A	[('HT6W37', ': ', array([ 0, 0, 35, 0]), ' ', array([ 0., 0., 1., 0.]), ' ', array([ 0., 0., 1., 0.])), ('HT6W45', ': ', array([ 0, 0, 26, 0]), ' ', array([ 0., 0., 1., 0.]), ' ', array([ 0., 0., 1., 0.])), ('HT6W47', ': ', array([ 0, 0, 47, 0]), ' ', array([ 0., 0., 1., 0.]), ' ', array([ 0., 0., 1., 0.])), ('HT6W48', ': ', array([ 0, 0, 45, 0]), ' ', array([ 0., 0., 1., 0.]), ' ', array([ 0., 0…	100010	1	0.522528	1	1
68	2	75908981	ACCxAAG	G	A	[('HT6W37', ': ', array([ 0, 0, 1, 41]), ' ', array([ 0. , 0. , 0.02380952, 0.97619048]), ' ', array([ 0., 0., 0., 1.])), ('HT6W45', ': ', array([ 0, 0, 0, 44]), ' ', array([ 0., 0., 0., 1.]), ' ', array([ 0., 0., 0., 1.])), ('HT6W47', ': ', array([ 0, 0, 0, 35]), ' ', array([ 0., 0., 0., 1.]), ' ', array([ 0., 0., 0., 1.])), ('HT6W48', ': ', array([ 0, 0, 0, 59]), ' ', array([ 0., 0., 0., 1.]), …	10110010	0.993741	0.512491	1	1
69	2	84043191	AATxTAA	T	G	[('HT6W37', ': ', array([ 0, 48, 0, 0]), ' ', array([ 0., 1., 0., 0.]), ' ', array([ 0., 1., 0., 0.])), ('HT6W45', ': ', array([ 0, 34, 0, 0]), ' ', array([ 0., 1., 0., 0.]), ' ', array([ 0., 1., 0., 0.])), ('HT6W47', ': ', array([ 0, 39, 0, 0]), ' ', array([ 0., 1., 0., 0.]), ' ', array([ 0., 1., 0., 0.])), ('HT6W48', ': ', array([ 0, 42, 0, 0]), ' ', array([ 0., 1., 0., 0.]), ' ', array([ 0., 1…	10110010	0.995798	0.511963	1	1
70	2	88498680	ACTxTAT	A	G	[('HT6W37', ': ', array([39, 0, 0, 0]), ' ', array([ 1., 0., 0., 0.]), ' ', array([ 1., 0., 0., 0.])), ('HT6W45', ': ', array([32, 0, 0, 0]), ' ', array([ 1., 0., 0., 0.]), ' ', array([ 1., 0., 0., 0.])), ('HT6W47', ': ', array([36, 0, 0, 0]), ' ', array([ 1., 0., 0., 0.]), ' ', array([ 1., 0., 0., 0.])), ('HT6W48', ': ', array([36, 0, 0, 0]), ' ', array([ 1., 0., 0., 0.]), ' ', array([ 1., 0., 0…	100010	0.996032	0.394481	1	1
71	2	88605471	GACxATT	G	A	[('HT6W37', ': ', array([ 0, 0, 0, 38]), ' ', array([ 0., 0., 0., 1.]), ' ', array([ 0., 0., 0., 1.])), ('HT6W45', ': ', array([ 0, 0, 0, 57]), ' ', array([ 0., 0., 0., 1.]), ' ', array([ 0., 0., 0., 1.])), ('HT6W47', ': ', array([ 0, 0, 0, 38]), ' ', array([ 0., 0., 0., 1.]), ' ', array([ 0., 0., 0., 1.])), ('HT6W48', ': ', array([ 0, 0, 0, 26]), ' ', array([ 0., 0., 0., 1.]), ' ', array([ 0., 0…	100010	1	0.558367	1	1
72	2	91781019	ATCxTCT	C	A	[('HT6W37', ': ', array([ 0, 0, 223, 0]), ' ', array([ 0., 0., 1., 0.]), ' ', array([ 0., 0., 1., 0.])), ('HT6W45', ': ', array([ 0, 0, 206, 0]), ' ', array([ 0., 0., 1., 0.]), ' ', array([ 0., 0., 1., 0.])), ('HT6W47', ': ', array([ 0, 2, 244, 0]), ' ', array([ 0. , 0.00813008, 0.99186992, 0. ]), ' ', array([ 0., 0., 1., 0.])), ('HT6W48', ': ', array([ 0, 1, 230, 0]), ' ', array([ 0. , 0.004329,…	100010	0.995051	0.0859486	1	1
73	2	103000228	ACAxTTG	G	A	[('HT6W37', ': ', array([ 0, 0, 0, 41]), ' ', array([ 0., 0., 0., 1.]), ' ', array([ 0., 0., 0., 1.])), ('HT6W45', ': ', array([ 0, 1, 0, 46]), ' ', array([ 0. , 0.0212766, 0. , 0.9787234]), ' ', array([ 0., 0., 0., 1.])), ('HT6W47', ': ', array([ 0, 0, 1, 31]), ' ', array([ 0. , 0. , 0.03125, 0.96875]), ' ', array([ 0., 0., 0., 1.])), ('HT6W48', ': ', array([ 0, 0, 0, 51]), ' ', array([ 0., 0., …	100010	0.982368	0.443443	1	1
74	2	108395130	AGTxTCT	C	A	[('HT6W37', ': ', array([ 0, 0, 40, 0]), ' ', array([ 0., 0., 1., 0.]), ' ', array([ 0., 0., 1., 0.])), ('HT6W45', ': ', array([ 0, 0, 42, 0]), ' ', array([ 0., 0., 1., 0.]), ' ', array([ 0., 0., 1., 0.])), ('HT6W47', ': ', array([ 0, 0, 47, 0]), ' ', array([ 0., 0., 1., 0.]), ' ', array([ 0., 0., 1., 0.])), ('HT6W48', ': ', array([ 0, 0, 46, 0]), ' ', array([ 0., 0., 1., 0.]), ' ', array([ 0., 0…	100010	0.996825	0.55841	1	1
75	2	116763657	GCAxGCA	A	G	[('HT6W37', ': ', array([35, 1, 0, 1]), ' ', array([ 0.94594595, 0.02702703, 0. , 0.02702703]), ' ', array([ 1., 0., 0., 0.])), ('HT6W45', ': ', array([34, 0, 0, 0]), ' ', array([ 1., 0., 0., 0.]), ' ', array([ 1., 0., 0., 0.])), ('HT6W47', ': ', array([46, 0, 0, 0]), ' ', array([ 1., 0., 0., 0.]), ' ', array([ 1., 0., 0., 0.])), ('HT6W48', ': ', array([51, 0, 0, 0]), ' ', array([ 1., 0., 0., 0.]…	100010	0.993994	0.533784	1	1
76	2	125218312	CCTxGCT	T	C	[('HT6W37', ': ', array([ 0, 46, 0, 0]), ' ', array([ 0., 1., 0., 0.]), ' ', array([ 0., 1., 0., 0.])), ('HT6W45', ': ', array([ 0, 46, 1, 0]), ' ', array([ 0. , 0.9787234, 0.0212766, 0. ]), ' ', array([ 0., 1., 0., 0.])), ('HT6W47', ': ', array([ 0, 36, 0, 0]), ' ', array([ 0., 1., 0., 0.]), ' ', array([ 0., 1., 0., 0.])), ('HT6W48', ': ', array([ 0, 30, 1, 0]), ' ', array([ 0. , 0.96774194, 0.0…	10110010	0.995392	0.502538	1	1
77	2	125263523	TTAxATG	G	T	[('HT6W37', ': ', array([ 0, 0, 0, 33]), ' ', array([ 0., 0., 0., 1.]), ' ', array([ 0., 0., 0., 1.])), ('HT6W45', ': ', array([ 0, 0, 0, 39]), ' ', array([ 0., 0., 0., 1.]), ' ', array([ 0., 0., 0., 1.])), ('HT6W47', ': ', array([ 0, 0, 0, 45]), ' ', array([ 0., 0., 0., 1.]), ' ', array([ 0., 0., 0., 1.])), ('HT6W48', ': ', array([ 0, 0, 0, 43]), ' ', array([ 0., 0., 0., 1.]), ' ', array([ 0., 0…	10110010	0.993789	0.452591	1	1
78	2	125664577	AGGxAAT	C	T	[('HT6W37', ': ', array([ 0, 0, 29, 0]), ' ', array([ 0., 0., 1., 0.]), ' ', array([ 0., 0., 1., 0.])), ('HT6W45', ': ', array([ 0, 0, 39, 0]), ' ', array([ 0., 0., 1., 0.]), ' ', array([ 0., 0., 1., 0.])), ('HT6W47', ': ', array([ 1, 1, 48, 0]), ' ', array([ 0.02, 0.02, 0.96, 0. ]), ' ', array([ 0., 0., 1., 0.])), ('HT6W48', ': ', array([ 0, 0, 36, 0]), ' ', array([ 0., 0., 1., 0.]), ' ', array(…	100010	0.990159	0.514333	1	1
79	2	125694100	GGTxTAA	T	G	[('HT6W37', ': ', array([ 0, 27, 0, 0]), ' ', array([ 0., 1., 0., 0.]), ' ', array([ 0., 1., 0., 0.])), ('HT6W45', ': ', array([ 0, 34, 0, 0]), ' ', array([ 0., 1., 0., 0.]), ' ', array([ 0., 1., 0., 0.])), ('HT6W47', ': ', array([ 0, 54, 0, 0]), ' ', array([ 0., 1., 0., 0.]), ' ', array([ 0., 1., 0., 0.])), ('HT6W48', ': ', array([ 0, 28, 0, 1]), ' ', array([ 0. , 0.96551724, 0. , 0.03448276]), …	100010	0.993523	0.486277	1	1
80	2	126654092	CGTxTCC	C	T	[('HT6W37', ': ', array([ 0, 0, 29, 0]), ' ', array([ 0., 0., 1., 0.]), ' ', array([ 0., 0., 1., 0.])), ('HT6W45', ': ', array([ 0, 0, 29, 0]), ' ', array([ 0., 0., 1., 0.]), ' ', array([ 0., 0., 1., 0.])), ('HT6W47', ': ', array([ 0, 0, 42, 0]), ' ', array([ 0., 0., 1., 0.]), ' ', array([ 0., 0., 1., 0.])), ('HT6W48', ': ', array([ 0, 0, 34, 0]), ' ', array([ 0., 0., 1., 0.]), ' ', array([ 0., 0…	100010	1	0.366667	1	1
81	2	134374860	TTGxAAG	A	G	[('HT6W37', ': ', array([34, 0, 0, 0]), ' ', array([ 1., 0., 0., 0.]), ' ', array([ 1., 0., 0., 0.])), ('HT6W45', ': ', array([40, 0, 0, 0]), ' ', array([ 1., 0., 0., 0.]), ' ', array([ 1., 0., 0., 0.])), ('HT6W47', ': ', array([40, 0, 0, 0]), ' ', array([ 1., 0., 0., 0.]), ' ', array([ 1., 0., 0., 0.])), ('HT6W48', ': ', array([42, 0, 0, 0]), ' ', array([ 1., 0., 0., 0.]), ' ', array([ 1., 0., 0…	100010	0.997732	0.49256	1	1
82	2	134691494	AGTxATT	A	C	[('HT6W37', ': ', array([39, 0, 0, 0]), ' ', array([ 1., 0., 0., 0.]), ' ', array([ 1., 0., 0., 0.])), ('HT6W45', ': ', array([40, 0, 0, 0]), ' ', array([ 1., 0., 0., 0.]), ' ', array([ 1., 0., 0., 0.])), ('HT6W47', ': ', array([43, 0, 0, 0]), ' ', array([ 1., 0., 0., 0.]), ' ', array([ 1., 0., 0., 0.])), ('HT6W48', ': ', array([43, 0, 0, 0]), ' ', array([ 1., 0., 0., 0.]), ' ', array([ 1., 0., 0…	10110010	0.996599	0.528875	1	1
83	2	140489074	AAAxTAT	T	G	[('HT6W37', ': ', array([ 0, 32, 0, 0]), ' ', array([ 0., 1., 0., 0.]), ' ', array([ 0., 1., 0., 0.])), ('HT6W45', ': ', array([ 0, 37, 0, 0]), ' ', array([ 0., 1., 0., 0.]), ' ', array([ 0., 1., 0., 0.])), ('HT6W47', ': ', array([ 0, 53, 0, 0]), ' ', array([ 0., 1., 0., 0.]), ' ', array([ 0., 1., 0., 0.])), ('HT6W48', ': ', array([ 0, 43, 1, 0]), ' ', array([ 0. , 0.97727273, 0.02272727, 0. ]), …	100010	0.994829	0.574663	1	1
84	2	141197967	GTTxTTA	C	A	[('HT6W37', ': ', array([ 0, 0, 24, 0]), ' ', array([ 0., 0., 1., 0.]), ' ', array([ 0., 0., 1., 0.])), ('HT6W45', ': ', array([ 0, 0, 28, 0]), ' ', array([ 0., 0., 1., 0.]), ' ', array([ 0., 0., 1., 0.])), ('HT6W47', ': ', array([ 0, 0, 56, 0]), ' ', array([ 0., 0., 1., 0.]), ' ', array([ 0., 0., 1., 0.])), ('HT6W48', ': ', array([ 0, 0, 36, 1]), ' ', array([ 0. , 0. , 0.97297297, 0.02702703]), …	10110010	0.988147	0.535328	1	1
85	2	141883325	GGAxAAG	G	T	[('HT6W37', ': ', array([ 0, 0, 0, 33]), ' ', array([ 0., 0., 0., 1.]), ' ', array([ 0., 0., 0., 1.])), ('HT6W45', ': ', array([ 2, 0, 0, 28]), ' ', array([ 0.06666667, 0. , 0. , 0.93333333]), ' ', array([ 0., 0., 0., 1.])), ('HT6W47', ': ', array([ 0, 0, 0, 30]), ' ', array([ 0., 0., 0., 1.]), ' ', array([ 0., 0., 0., 1.])), ('HT6W48', ': ', array([ 0, 0, 0, 34]), ' ', array([ 0., 0., 0., 1.]), …	100010	0.980158	0.525328	1	1
86	2	148858028	CATxTTA	T	G	[('HT6W37', ': ', array([ 0, 39, 0, 0]), ' ', array([ 0., 1., 0., 0.]), ' ', array([ 0., 1., 0., 0.])), ('HT6W45', ': ', array([ 0, 28, 0, 0]), ' ', array([ 0., 1., 0., 0.]), ' ', array([ 0., 1., 0., 0.])), ('HT6W47', ': ', array([ 0, 46, 0, 0]), ' ', array([ 0., 1., 0., 0.]), ' ', array([ 0., 1., 0., 0.])), ('HT6W48', ': ', array([ 0, 36, 0, 1]), ' ', array([ 0. , 0.97297297, 0. , 0.02702703]), …	100010	0.994148	0.55102	1	1
87	2	152500004	GAAxATT	A	C	[('HT6W37', ': ', array([55, 0, 0, 0]), ' ', array([ 1., 0., 0., 0.]), ' ', array([ 1., 0., 0., 0.])), ('HT6W45', ': ', array([45, 0, 1, 0]), ' ', array([ 0.97826087, 0. , 0.02173913, 0. ]), ' ', array([ 1., 0., 0., 0.])), ('HT6W47', ': ', array([47, 0, 0, 0]), ' ', array([ 1., 0., 0., 0.]), ' ', array([ 1., 0., 0., 0.])), ('HT6W48', ': ', array([41, 0, 0, 0]), ' ', array([ 1., 0., 0., 0.]), ' ',…	100010	1	0.420455	1	1
88	2	154220605	GCAxATA	A	C	[('HT6W37', ': ', array([42, 0, 0, 0]), ' ', array([ 1., 0., 0., 0.]), ' ', array([ 1., 0., 0., 0.])), ('HT6W45', ': ', array([32, 0, 0, 0]), ' ', array([ 1., 0., 0., 0.]), ' ', array([ 1., 0., 0., 0.])), ('HT6W47', ': ', array([48, 0, 1, 0]), ' ', array([ 0.97959184, 0. , 0.02040816, 0. ]), ' ', array([ 1., 0., 0., 0.])), ('HT6W48', ': ', array([51, 0, 0, 0]), ' ', array([ 1., 0., 0., 0.]), ' ',…	100010	0.997732	0.445588	1	1
89	2	154461762	GCTxTTT	C	T	[('HT6W37', ': ', array([ 0, 0, 43, 0]), ' ', array([ 0., 0., 1., 0.]), ' ', array([ 0., 0., 1., 0.])), ('HT6W45', ': ', array([ 0, 0, 35, 0]), ' ', array([ 0., 0., 1., 0.]), ' ', array([ 0., 0., 1., 0.])), ('HT6W47', ': ', array([ 0, 0, 56, 0]), ' ', array([ 0., 0., 1., 0.]), ' ', array([ 0., 0., 1., 0.])), ('HT6W48', ': ', array([ 0, 1, 46, 0]), ' ', array([ 0. , 0.0212766, 0.9787234, 0. ]), ' …	100010	0.994787	0.442049	1	1
90	2	160064347	TTGxCTC	C	T	[('HT6W37', ': ', array([ 0, 0, 39, 0]), ' ', array([ 0., 0., 1., 0.]), ' ', array([ 0., 0., 1., 0.])), ('HT6W45', ': ', array([ 0, 0, 29, 0]), ' ', array([ 0., 0., 1., 0.]), ' ', array([ 0., 0., 1., 0.])), ('HT6W47', ': ', array([ 1, 0, 43, 0]), ' ', array([ 0.02272727, 0. , 0.97727273, 0. ]), ' ', array([ 0., 0., 1., 0.])), ('HT6W48', ': ', array([ 0, 0, 42, 0]), ' ', array([ 0., 0., 1., 0.]), …	10110010	0.990396	0.465166	1	1
91	2	164128154	AAAxAAT	G	T	[('HT6W37', ': ', array([ 0, 0, 0, 38]), ' ', array([ 0., 0., 0., 1.]), ' ', array([ 0., 0., 0., 1.])), ('HT6W45', ': ', array([ 0, 0, 0, 43]), ' ', array([ 0., 0., 0., 1.]), ' ', array([ 0., 0., 0., 1.])), ('HT6W47', ': ', array([ 0, 0, 0, 37]), ' ', array([ 0., 0., 0., 1.]), ' ', array([ 0., 0., 0., 1.])), ('HT6W48', ': ', array([ 1, 0, 0, 45]), ' ', array([ 0.02173913, 0. , 0. , 0.97826087]), …	100010	0.988518	0.373308	0.999999	1
92	2	164261420	TATxTTT	C	A	[('HT6W37', ': ', array([ 0, 0, 35, 0]), ' ', array([ 0., 0., 1., 0.]), ' ', array([ 0., 0., 1., 0.])), ('HT6W45', ': ', array([ 0, 0, 29, 0]), ' ', array([ 0., 0., 1., 0.]), ' ', array([ 0., 0., 1., 0.])), ('HT6W47', ': ', array([ 0, 0, 30, 0]), ' ', array([ 0., 0., 1., 0.]), ' ', array([ 0., 0., 1., 0.])), ('HT6W48', ': ', array([ 0, 0, 40, 0]), ' ', array([ 0., 0., 1., 0.]), ' ', array([ 0., 0…	10110010	0.992278	0.521441	1	1
93	2	167940703	TGAxATA	G	T	[('HT6W37', ': ', array([ 0, 0, 1, 33]), ' ', array([ 0. , 0. , 0.02941176, 0.97058824]), ' ', array([ 0., 0., 0., 1.])), ('HT6W45', ': ', array([ 0, 0, 0, 37]), ' ', array([ 0., 0., 0., 1.]), ' ', array([ 0., 0., 0., 1.])), ('HT6W47', ': ', array([ 0, 0, 0, 51]), ' ', array([ 0., 0., 0., 1.]), ' ', array([ 0., 0., 0., 1.])), ('HT6W48', ': ', array([ 0, 0, 0, 40]), ' ', array([ 0., 0., 0., 1.]), …	10110010	0.990956	0.398267	1	1
94	2	178469961	ACGxTAA	A	G	[('HT6W37', ': ', array([53, 0, 0, 0]), ' ', array([ 1., 0., 0., 0.]), ' ', array([ 1., 0., 0., 0.])), ('HT6W45', ': ', array([50, 0, 0, 0]), ' ', array([ 1., 0., 0., 0.]), ' ', array([ 1., 0., 0., 0.])), ('HT6W47', ': ', array([47, 0, 1, 0]), ' ', array([ 0.97916667, 0. , 0.02083333, 0. ]), ' ', array([ 1., 0., 0., 0.])), ('HT6W48', ': ', array([45, 0, 0, 0]), ' ', array([ 1., 0., 0., 0.]), ' ',…	100010	0.995548	0.439103	1	1
95	2	182901373	ACCxTTA	G	A	[('HT6W37', ': ', array([ 0, 0, 0, 30]), ' ', array([ 0., 0., 0., 1.]), ' ', array([ 0., 0., 0., 1.])), ('HT6W45', ': ', array([ 0, 0, 0, 38]), ' ', array([ 0., 0., 0., 1.]), ' ', array([ 0., 0., 0., 1.])), ('HT6W47', ': ', array([ 0, 0, 0, 37]), ' ', array([ 0., 0., 0., 1.]), ' ', array([ 0., 0., 0., 1.])), ('HT6W48', ': ', array([ 0, 1, 0, 38]), ' ', array([ 0. , 0.02564103, 0. , 0.97435897]), …	100010	0.990608	0.504762	1	1
96	2	186484779	CTTxTGT	T	G	[('HT6W37', ': ', array([ 0, 26, 0, 0]), ' ', array([ 0., 1., 0., 0.]), ' ', array([ 0., 1., 0., 0.])), ('HT6W45', ': ', array([ 0, 34, 0, 1]), ' ', array([ 0. , 0.97142857, 0. , 0.02857143]), ' ', array([ 0., 1., 0., 0.])), ('HT6W47', ': ', array([ 0, 41, 1, 0]), ' ', array([ 0. , 0.97619048, 0.02380952, 0. ]), ' ', array([ 0., 1., 0., 0.])), ('HT6W48', ': ', array([ 0, 45, 0, 0]), ' ', array([ …	100010	0.997354	0.452265	1	1
97	2	186705062	CCTxTGT	G	A	[('HT6W37', ': ', array([ 1, 0, 0, 43]), ' ', array([ 0.02272727, 0. , 0. , 0.97727273]), ' ', array([ 0., 0., 0., 1.])), ('HT6W45', ': ', array([ 0, 0, 0, 35]), ' ', array([ 0., 0., 0., 1.]), ' ', array([ 0., 0., 0., 1.])), ('HT6W47', ': ', array([ 0, 0, 0, 41]), ' ', array([ 0., 0., 0., 1.]), ' ', array([ 0., 0., 0., 1.])), ('HT6W48', ': ', array([ 0, 0, 0, 37]), ' ', array([ 0., 0., 0., 1.]), …	10110010	0.98825	0.519535	1	1
98	2	186705063	CTGxGTC	T	G	[('HT6W37', ': ', array([ 0, 43, 0, 0]), ' ', array([ 0., 1., 0., 0.]), ' ', array([ 0., 1., 0., 0.])), ('HT6W45', ': ', array([ 0, 35, 0, 0]), ' ', array([ 0., 1., 0., 0.]), ' ', array([ 0., 1., 0., 0.])), ('HT6W47', ': ', array([ 0, 41, 0, 0]), ' ', array([ 0., 1., 0., 0.]), ' ', array([ 0., 1., 0., 0.])), ('HT6W48', ': ', array([ 0, 37, 0, 0]), ' ', array([ 0., 1., 0., 0.]), ' ', array([ 0., 1…	10110010	1	0.533034	1	1
99	2	187069733	CTTxAAT	C	A	[('HT6W37', ': ', array([ 0, 0, 37, 0]), ' ', array([ 0., 0., 1., 0.]), ' ', array([ 0., 0., 1., 0.])), ('HT6W45', ': ', array([ 0, 0, 31, 0]), ' ', array([ 0., 0., 1., 0.]), ' ', array([ 0., 0., 1., 0.])), ('HT6W47', ': ', array([ 0, 0, 33, 0]), ' ', array([ 0., 0., 1., 0.]), ' ', array([ 0., 0., 1., 0.])), ('HT6W48', ': ', array([ 0, 0, 57, 0]), ' ', array([ 0., 0., 1., 0.]), ' ', array([ 0., 0…	100010	1	0.50509	1	1
100	2	188049303	TTTxAAT	C	T	[('HT6W37', ': ', array([ 0, 0, 37, 0]), ' ', array([ 0., 0., 1., 0.]), ' ', array([ 0., 0., 1., 0.])), ('HT6W45', ': ', array([ 0, 0, 41, 0]), ' ', array([ 0., 0., 1., 0.]), ' ', array([ 0., 0., 1., 0.])), ('HT6W47', ': ', array([ 1, 0, 44, 0]), ' ', array([ 0.02222222, 0. , 0.97777778, 0. ]), ' ', array([ 0., 0., 1., 0.])), ('HT6W48', ': ', array([ 0, 0, 45, 0]), ' ', array([ 0., 0., 1., 0.]), …	10110010	0.996825	0.480368	1	1
101	2	194323966	AAAxTAT	A	C	[('HT6W37', ': ', array([36, 0, 0, 0]), ' ', array([ 1., 0., 0., 0.]), ' ', array([ 1., 0., 0., 0.])), ('HT6W45', ': ', array([50, 0, 0, 0]), ' ', array([ 1., 0., 0., 0.]), ' ', array([ 1., 0., 0., 0.])), ('HT6W47', ': ', array([60, 0, 0, 0]), ' ', array([ 1., 0., 0., 0.]), ' ', array([ 1., 0., 0., 0.])), ('HT6W48', ': ', array([47, 0, 0, 0]), ' ', array([ 1., 0., 0., 0.]), ' ', array([ 1., 0., 0…	100010	0.997821	0.557181	1	1
102	2	205270647	AATxTCA	C	A	[('HT6W37', ': ', array([ 0, 0, 26, 0]), ' ', array([ 0., 0., 1., 0.]), ' ', array([ 0., 0., 1., 0.])), ('HT6W45', ': ', array([ 0, 0, 37, 0]), ' ', array([ 0., 0., 1., 0.]), ' ', array([ 0., 0., 1., 0.])), ('HT6W47', ': ', array([ 0, 0, 42, 0]), ' ', array([ 0., 0., 1., 0.]), ' ', array([ 0., 0., 1., 0.])), ('HT6W48', ': ', array([ 0, 0, 44, 0]), ' ', array([ 0., 0., 1., 0.]), ' ', array([ 0., 0…	100010	0.997076	0.460108	1	1
103	2	210291466	TCTxTTT	C	A	[('HT6W37', ': ', array([ 0, 0, 27, 0]), ' ', array([ 0., 0., 1., 0.]), ' ', array([ 0., 0., 1., 0.])), ('HT6W45', ': ', array([ 0, 0, 45, 0]), ' ', array([ 0., 0., 1., 0.]), ' ', array([ 0., 0., 1., 0.])), ('HT6W47', ': ', array([ 0, 0, 39, 0]), ' ', array([ 0., 0., 1., 0.]), ' ', array([ 0., 0., 1., 0.])), ('HT6W48', ': ', array([ 0, 0, 48, 0]), ' ', array([ 0., 0., 1., 0.]), ' ', array([ 0., 0…	10110010	1	0.505086	1	1
104	2	215238734	GCTxGAA	A	T	[('HT6W37', ': ', array([27, 0, 0, 0]), ' ', array([ 1., 0., 0., 0.]), ' ', array([ 1., 0., 0., 0.])), ('HT6W45', ': ', array([25, 0, 1, 0]), ' ', array([ 0.96153846, 0. , 0.03846154, 0. ]), ' ', array([ 1., 0., 0., 0.])), ('HT6W47', ': ', array([37, 0, 1, 0]), ' ', array([ 0.97368421, 0. , 0.02631579, 0. ]), ' ', array([ 1., 0., 0., 0.])), ('HT6W48', ': ', array([45, 0, 0, 0]), ' ', array([ 1., …	100010	0.993245	0.416987	1	1
105	2	215238735	CTAxAAA	G	A	[('HT6W37', ': ', array([ 0, 0, 0, 27]), ' ', array([ 0., 0., 0., 1.]), ' ', array([ 0., 0., 0., 1.])), ('HT6W45', ': ', array([ 0, 0, 0, 25]), ' ', array([ 0., 0., 0., 1.]), ' ', array([ 0., 0., 0., 1.])), ('HT6W47', ': ', array([ 0, 0, 0, 38]), ' ', array([ 0., 0., 0., 1.]), ' ', array([ 0., 0., 0., 1.])), ('HT6W48', ': ', array([ 0, 0, 1, 44]), ' ', array([ 0. , 0. , 0.02222222, 0.97777778]), …	10110010	0.992624	0.519079	1	1
106	2	221146334	ACAxATC	G	A	[('HT6W37', ': ', array([ 0, 0, 0, 29]), ' ', array([ 0., 0., 0., 1.]), ' ', array([ 0., 0., 0., 1.])), ('HT6W45', ': ', array([ 0, 0, 0, 35]), ' ', array([ 0., 0., 0., 1.]), ' ', array([ 0., 0., 0., 1.])), ('HT6W47', ': ', array([ 0, 0, 0, 23]), ' ', array([ 0., 0., 0., 1.]), ' ', array([ 0., 0., 0., 1.])), ('HT6W48', ': ', array([ 0, 0, 0, 42]), ' ', array([ 0., 0., 0., 1.]), ' ', array([ 0., 0…	10110010	0.988588	0.514597	1	1
107	2	227962572	CTTxTCA	C	A	[('HT6W37', ': ', array([ 0, 0, 49, 0]), ' ', array([ 0., 0., 1., 0.]), ' ', array([ 0., 0., 1., 0.])), ('HT6W45', ': ', array([ 0, 0, 36, 0]), ' ', array([ 0., 0., 1., 0.]), ' ', array([ 0., 0., 1., 0.])), ('HT6W47', ': ', array([ 0, 0, 42, 0]), ' ', array([ 0., 0., 1., 0.]), ' ', array([ 0., 0., 1., 0.])), ('HT6W48', ': ', array([ 0, 0, 43, 0]), ' ', array([ 0., 0., 1., 0.]), ' ', array([ 0., 0…	10110010	1	0.508794	1	1
108	3	961200	AGAxATC	A	G	[('HT6W37', ': ', array([25, 0, 0, 0]), ' ', array([ 1., 0., 0., 0.]), ' ', array([ 1., 0., 0., 0.])), ('HT6W45', ': ', array([29, 1, 0, 0]), ' ', array([ 0.96666667, 0.03333333, 0. , 0. ]), ' ', array([ 1., 0., 0., 0.])), ('HT6W47', ': ', array([44, 0, 0, 0]), ' ', array([ 1., 0., 0., 0.]), ' ', array([ 1., 0., 0., 0.])), ('HT6W48', ': ', array([44, 0, 1, 0]), ' ', array([ 0.97777778, 0. , 0.022…	100010	0.994263	0.521368	1	1
109	3	2371364	ACAxAAC	G	T	[('HT6W37', ': ', array([ 0, 0, 0, 35]), ' ', array([ 0., 0., 0., 1.]), ' ', array([ 0., 0., 0., 1.])), ('HT6W45', ': ', array([ 0, 0, 0, 36]), ' ', array([ 0., 0., 0., 1.]), ' ', array([ 0., 0., 0., 1.])), ('HT6W47', ': ', array([ 0, 0, 0, 33]), ' ', array([ 0., 0., 0., 1.]), ' ', array([ 0., 0., 0., 1.])), ('HT6W48', ': ', array([ 0, 0, 0, 32]), ' ', array([ 0., 0., 0., 1.]), ' ', array([ 0., 0…	100010	0.997585	0.455793	1	1
110	3	3663380	ATGxTGG	C	A	[('HT6W37', ': ', array([ 0, 0, 32, 0]), ' ', array([ 0., 0., 1., 0.]), ' ', array([ 0., 0., 1., 0.])), ('HT6W45', ': ', array([ 0, 0, 31, 0]), ' ', array([ 0., 0., 1., 0.]), ' ', array([ 0., 0., 1., 0.])), ('HT6W47', ': ', array([ 0, 0, 34, 0]), ' ', array([ 0., 0., 1., 0.]), ' ', array([ 0., 0., 1., 0.])), ('HT6W48', ': ', array([ 0, 0, 43, 0]), ' ', array([ 0., 0., 1., 0.]), ' ', array([ 0., 0…	10110010	1	0.461126	1	1
111	3	6116557	CCAxTCT	T	G	[('HT6W37', ': ', array([ 0, 31, 0, 0]), ' ', array([ 0., 1., 0., 0.]), ' ', array([ 0., 1., 0., 0.])), ('HT6W45', ': ', array([ 0, 46, 0, 0]), ' ', array([ 0., 1., 0., 0.]), ' ', array([ 0., 1., 0., 0.])), ('HT6W47', ': ', array([ 0, 46, 0, 0]), ' ', array([ 0., 1., 0., 0.]), ' ', array([ 0., 1., 0., 0.])), ('HT6W48', ': ', array([ 0, 36, 0, 0]), ' ', array([ 0., 1., 0., 0.]), ' ', array([ 0., 1…	10110010	1	0.470895	1	1
112	3	9930894	TCAxACC	G	T	[('HT6W37', ': ', array([ 0, 0, 0, 35]), ' ', array([ 0., 0., 0., 1.]), ' ', array([ 0., 0., 0., 1.])), ('HT6W45', ': ', array([ 0, 0, 0, 43]), ' ', array([ 0., 0., 0., 1.]), ' ', array([ 0., 0., 0., 1.])), ('HT6W47', ': ', array([ 0, 0, 0, 45]), ' ', array([ 0., 0., 0., 1.]), ' ', array([ 0., 0., 0., 1.])), ('HT6W48', ': ', array([ 0, 0, 0, 42]), ' ', array([ 0., 0., 0., 1.]), ' ', array([ 0., 0…	100010	0.98713	0.526455	1	1
113	3	10539137	GTGxTTA	T	C	[('HT6W37', ': ', array([ 0, 39, 0, 1]), ' ', array([ 0. , 0.975, 0. , 0.025]), ' ', array([ 0., 1., 0., 0.])), ('HT6W45', ': ', array([ 0, 44, 0, 0]), ' ', array([ 0., 1., 0., 0.]), ' ', array([ 0., 1., 0., 0.])), ('HT6W47', ': ', array([ 0, 41, 0, 0]), ' ', array([ 0., 1., 0., 0.]), ' ', array([ 0., 1., 0., 0.])), ('HT6W48', ': ', array([ 0, 45, 1, 0]), ' ', array([ 0. , 0.97826087, 0.02173913,…	100010	0.989756	0.459302	1	1
114	3	17309274	AAGxTCC	G	C	[('HT6W37', ': ', array([ 0, 0, 0, 38]), ' ', array([ 0., 0., 0., 1.]), ' ', array([ 0., 0., 0., 1.])), ('HT6W45', ': ', array([ 0, 0, 0, 32]), ' ', array([ 0., 0., 0., 1.]), ' ', array([ 0., 0., 0., 1.])), ('HT6W47', ': ', array([ 0, 0, 0, 44]), ' ', array([ 0., 0., 0., 1.]), ' ', array([ 0., 0., 0., 1.])), ('HT6W48', ': ', array([ 0, 0, 0, 44]), ' ', array([ 0., 0., 0., 1.]), ' ', array([ 0., 0…	10110010	0.98467	0.555575	1	1
115	3	19530458	TTTxTCC	T	G	[('HT6W37', ': ', array([ 0, 34, 1, 0]), ' ', array([ 0. , 0.97142857, 0.02857143, 0. ]), ' ', array([ 0., 1., 0., 0.])), ('HT6W45', ': ', array([ 0, 25, 0, 0]), ' ', array([ 0., 1., 0., 0.]), ' ', array([ 0., 1., 0., 0.])), ('HT6W47', ': ', array([ 0, 43, 0, 0]), ' ', array([ 0., 1., 0., 0.]), ' ', array([ 0., 1., 0., 0.])), ('HT6W48', ': ', array([ 0, 30, 0, 0]), ' ', array([ 0., 1., 0., 0.]), …	10110010	0.992159	0.503962	1	1
116	3	21258477	ATGxTCT	T	C	[('HT6W37', ': ', array([ 0, 32, 0, 0]), ' ', array([ 0., 1., 0., 0.]), ' ', array([ 0., 1., 0., 0.])), ('HT6W45', ': ', array([ 0, 27, 0, 0]), ' ', array([ 0., 1., 0., 0.]), ' ', array([ 0., 1., 0., 0.])), ('HT6W47', ': ', array([ 0, 43, 0, 0]), ' ', array([ 0., 1., 0., 0.]), ' ', array([ 0., 1., 0., 0.])), ('HT6W48', ': ', array([ 0, 37, 0, 0]), ' ', array([ 0., 1., 0., 0.]), ' ', array([ 0., 1…	100010	0.997685	0.542596	1	1
117	3	23193088	AAGxTAT	T	C	[('HT6W37', ': ', array([ 0, 43, 0, 0]), ' ', array([ 0., 1., 0., 0.]), ' ', array([ 0., 1., 0., 0.])), ('HT6W45', ': ', array([ 0, 37, 0, 0]), ' ', array([ 0., 1., 0., 0.]), ' ', array([ 0., 1., 0., 0.])), ('HT6W47', ': ', array([ 0, 37, 0, 0]), ' ', array([ 0., 1., 0., 0.]), ' ', array([ 0., 1., 0., 0.])), ('HT6W48', ': ', array([ 0, 32, 0, 0]), ' ', array([ 0., 1., 0., 0.]), ' ', array([ 0., 1…	100010	0.992774	0.533883	1	1
118	3	32463460	GGCxCAA	C	T	[('HT6W37', ': ', array([ 0, 0, 40, 0]), ' ', array([ 0., 0., 1., 0.]), ' ', array([ 0., 0., 1., 0.])), ('HT6W45', ': ', array([ 0, 0, 36, 0]), ' ', array([ 0., 0., 1., 0.]), ' ', array([ 0., 0., 1., 0.])), ('HT6W47', ': ', array([ 0, 0, 34, 0]), ' ', array([ 0., 0., 1., 0.]), ' ', array([ 0., 0., 1., 0.])), ('HT6W48', ': ', array([ 0, 1, 41, 0]), ' ', array([ 0. , 0.02380952, 0.97619048, 0. ]), …	10110010	0.982309	0.543706	1	1
119	3	40956679	GTTxTAT	T	G	[('HT6W37', ': ', array([ 0, 35, 0, 0]), ' ', array([ 0., 1., 0., 0.]), ' ', array([ 0., 1., 0., 0.])), ('HT6W45', ': ', array([ 0, 33, 0, 0]), ' ', array([ 0., 1., 0., 0.]), ' ', array([ 0., 1., 0., 0.])), ('HT6W47', ': ', array([ 0, 40, 0, 0]), ' ', array([ 0., 1., 0., 0.]), ' ', array([ 0., 1., 0., 0.])), ('HT6W48', ': ', array([ 0, 46, 0, 1]), ' ', array([ 0. , 0.9787234, 0. , 0.0212766]), ' …	10110010	0.99696	0.358724	1	1
120	3	43919403	AAGxCAA	C	T	[('HT6W37', ': ', array([ 1, 0, 50, 0]), ' ', array([ 0.01923077, 0. , 0.96153846, 0. ]), ' ', array([ 0., 0., 1., 0.])), ('HT6W45', ': ', array([ 0, 0, 43, 0]), ' ', array([ 0., 0., 1., 0.]), ' ', array([ 0., 0., 1., 0.])), ('HT6W47', ': ', array([ 0, 0, 46, 0]), ' ', array([ 0., 0., 1., 0.]), ' ', array([ 0., 0., 1., 0.])), ('HT6W48', ': ', array([ 0, 0, 47, 0]), ' ', array([ 0., 0., 1., 0.]), …	10110010	0.987347	0.524788	1	1
121	3	44227112	GCCxATT	A	T	[('HT6W37', ': ', array([45, 0, 0, 0]), ' ', array([ 1., 0., 0., 0.]), ' ', array([ 1., 0., 0., 0.])), ('HT6W45', ': ', array([32, 0, 0, 1]), ' ', array([ 0.96969697, 0. , 0. , 0.03030303]), ' ', array([ 1., 0., 0., 0.])), ('HT6W47', ': ', array([38, 0, 0, 0]), ' ', array([ 1., 0., 0., 0.]), ' ', array([ 1., 0., 0., 0.])), ('HT6W48', ': ', array([32, 0, 0, 0]), ' ', array([ 1., 0., 0., 0.]), ' ',…	100010	0.986922	0.548077	1	1
122	3	50234065	GTAxCTG	C	T	[('HT6W37', ': ', array([ 1, 0, 31, 0]), ' ', array([ 0.03125, 0. , 0.96875, 0. ]), ' ', array([ 0., 0., 1., 0.])), ('HT6W45', ': ', array([ 0, 0, 29, 0]), ' ', array([ 0., 0., 1., 0.]), ' ', array([ 0., 0., 1., 0.])), ('HT6W47', ': ', array([ 0, 1, 37, 0]), ' ', array([ 0. , 0.02631579, 0.97368421, 0. ]), ' ', array([ 0., 0., 1., 0.])), ('HT6W48', ': ', array([ 0, 0, 31, 0]), ' ', array([ 0., 0.…	10110010	0.988454	0.467904	1	1
123	3	50307902	GTGxAAC	C	A	[('HT6W37', ': ', array([ 0, 0, 47, 0]), ' ', array([ 0., 0., 1., 0.]), ' ', array([ 0., 0., 1., 0.])), ('HT6W45', ': ', array([ 0, 0, 40, 0]), ' ', array([ 0., 0., 1., 0.]), ' ', array([ 0., 0., 1., 0.])), ('HT6W47', ': ', array([ 0, 0, 36, 0]), ' ', array([ 0., 0., 1., 0.]), ' ', array([ 0., 0., 1., 0.])), ('HT6W48', ': ', array([ 0, 0, 60, 0]), ' ', array([ 0., 0., 1., 0.]), ' ', array([ 0., 0…	10110010	0.99696	0.487538	1	1
124	3	64876136	ACTxTCT	C	A	[('HT6W37', ': ', array([ 0, 0, 31, 0]), ' ', array([ 0., 0., 1., 0.]), ' ', array([ 0., 0., 1., 0.])), ('HT6W45', ': ', array([ 0, 0, 46, 1]), ' ', array([ 0. , 0. , 0.9787234, 0.0212766]), ' ', array([ 0., 0., 1., 0.])), ('HT6W47', ': ', array([ 0, 0, 29, 0]), ' ', array([ 0., 0., 1., 0.]), ' ', array([ 0., 0., 1., 0.])), ('HT6W48', ': ', array([ 0, 0, 49, 0]), ' ', array([ 0., 0., 1., 0.]), ' …	10110010	0.996032	0.482994	1	1
125	3	66337592	AGGxGCC	C	T	[('HT6W37', ': ', array([ 0, 0, 34, 0]), ' ', array([ 0., 0., 1., 0.]), ' ', array([ 0., 0., 1., 0.])), ('HT6W45', ': ', array([ 0, 0, 28, 0]), ' ', array([ 0., 0., 1., 0.]), ' ', array([ 0., 0., 1., 0.])), ('HT6W47', ': ', array([ 0, 0, 40, 0]), ' ', array([ 0., 0., 1., 0.]), ' ', array([ 0., 0., 1., 0.])), ('HT6W48', ': ', array([ 0, 0, 32, 0]), ' ', array([ 0., 0., 1., 0.]), ' ', array([ 0., 0…	10110010	0.992159	0.581898	1	1
126	3	68616675	AGAxTTT	A	G	[('HT6W37', ': ', array([33, 1, 0, 0]), ' ', array([ 0.97058824, 0.02941176, 0. , 0. ]), ' ', array([ 1., 0., 0., 0.])), ('HT6W45', ': ', array([36, 1, 1, 0]), ' ', array([ 0.94736842, 0.02631579, 0.02631579, 0. ]), ' ', array([ 1., 0., 0., 0.])), ('HT6W47', ': ', array([30, 1, 1, 0]), ' ', array([ 0.9375 , 0.03125, 0.03125, 0. ]), ' ', array([ 1., 0., 0., 0.])), ('HT6W48', ': ', array([39, 1, 0,…	10110010	0.964749	0.468658	1	1
127	3	72850530	ATTxTTT	T	G	[('HT6W37', ': ', array([ 0, 33, 0, 0]), ' ', array([ 0., 1., 0., 0.]), ' ', array([ 0., 1., 0., 0.])), ('HT6W45', ': ', array([ 0, 33, 0, 0]), ' ', array([ 0., 1., 0., 0.]), ' ', array([ 0., 1., 0., 0.])), ('HT6W47', ': ', array([ 0, 59, 0, 0]), ' ', array([ 0., 1., 0., 0.]), ' ', array([ 0., 1., 0., 0.])), ('HT6W48', ': ', array([ 0, 42, 0, 0]), ' ', array([ 0., 1., 0., 0.]), ' ', array([ 0., 1…	100010	0.994709	0.425519	1	1
128	3	75939304	CCCxGAG	A	C	[('HT6W37', ': ', array([36, 0, 0, 0]), ' ', array([ 1., 0., 0., 0.]), ' ', array([ 1., 0., 0., 0.])), ('HT6W45', ': ', array([30, 0, 1, 0]), ' ', array([ 0.96774194, 0. , 0.03225806, 0. ]), ' ', array([ 1., 0., 0., 0.])), ('HT6W47', ': ', array([33, 0, 0, 0]), ' ', array([ 1., 0., 0., 0.]), ' ', array([ 1., 0., 0., 0.])), ('HT6W48', ': ', array([42, 0, 0, 0]), ' ', array([ 1., 0., 0., 0.]), ' ',…	100010	1	0.448868	1	1
129	3	80102712	ATAxGAA	G	T	[('HT6W37', ': ', array([ 0, 0, 0, 32]), ' ', array([ 0., 0., 0., 1.]), ' ', array([ 0., 0., 0., 1.])), ('HT6W45', ': ', array([ 0, 0, 0, 37]), ' ', array([ 0., 0., 0., 1.]), ' ', array([ 0., 0., 0., 1.])), ('HT6W47', ': ', array([ 0, 0, 0, 43]), ' ', array([ 0., 0., 0., 1.]), ' ', array([ 0., 0., 0., 1.])), ('HT6W48', ': ', array([ 0, 0, 0, 43]), ' ', array([ 0., 0., 0., 1.]), ' ', array([ 0., 0…	100010	0.996633	0.512043	1	1
130	3	82135946	TTAxCAA	A	G	[('HT6W37', ': ', array([28, 0, 0, 0]), ' ', array([ 1., 0., 0., 0.]), ' ', array([ 1., 0., 0., 0.])), ('HT6W45', ': ', array([35, 0, 1, 0]), ' ', array([ 0.97222222, 0. , 0.02777778, 0. ]), ' ', array([ 1., 0., 0., 0.])), ('HT6W47', ': ', array([42, 0, 0, 0]), ' ', array([ 1., 0., 0., 0.]), ' ', array([ 1., 0., 0., 0.])), ('HT6W48', ': ', array([33, 0, 0, 0]), ' ', array([ 1., 0., 0., 0.]), ' ',…	10110010	1	0.551261	1	1
131	3	82970084	AAAxAAC	G	A	[('HT6W37', ': ', array([ 0, 0, 0, 16]), ' ', array([ 0., 0., 0., 1.]), ' ', array([ 0., 0., 0., 1.])), ('HT6W45', ': ', array([ 0, 0, 0, 33]), ' ', array([ 0., 0., 0., 1.]), ' ', array([ 0., 0., 0., 1.])), ('HT6W47', ': ', array([ 0, 0, 0, 45]), ' ', array([ 0., 0., 0., 1.]), ' ', array([ 0., 0., 0., 1.])), ('HT6W48', ': ', array([ 0, 0, 1, 49]), ' ', array([ 0. , 0. , 0.02, 0.98]), ' ', array([…	100010	0.991851	0.454311	0.999995	1
132	3	95312032	AGAxGCT	T	C	[('HT6W37', ': ', array([ 0, 24, 0, 0]), ' ', array([ 0., 1., 0., 0.]), ' ', array([ 0., 1., 0., 0.])), ('HT6W45', ': ', array([ 0, 28, 0, 0]), ' ', array([ 0., 1., 0., 0.]), ' ', array([ 0., 1., 0., 0.])), ('HT6W47', ': ', array([ 0, 58, 0, 0]), ' ', array([ 0., 1., 0., 0.]), ' ', array([ 0., 1., 0., 0.])), ('HT6W48', ': ', array([ 0, 45, 1, 0]), ' ', array([ 0. , 0.97826087, 0.02173913, 0. ]), …	10110010	0.996894	0.542275	1	1
133	3	97417912	CAAxGCA	A	C	[('HT6W37', ': ', array([35, 0, 0, 0]), ' ', array([ 1., 0., 0., 0.]), ' ', array([ 1., 0., 0., 0.])), ('HT6W45', ': ', array([40, 1, 1, 0]), ' ', array([ 0.95238095, 0.02380952, 0.02380952, 0. ]), ' ', array([ 1., 0., 0., 0.])), ('HT6W47', ': ', array([47, 0, 0, 0]), ' ', array([ 1., 0., 0., 0.]), ' ', array([ 1., 0., 0., 0.])), ('HT6W48', ': ', array([37, 0, 0, 0]), ' ', array([ 1., 0., 0., 0.]…	100010	0.996825	0.519898	1	1
134	3	103601087	TTTxTTT	C	A	[('HT6W37', ': ', array([ 0, 0, 42, 0]), ' ', array([ 0., 0., 1., 0.]), ' ', array([ 0., 0., 1., 0.])), ('HT6W45', ': ', array([ 0, 0, 43, 1]), ' ', array([ 0. , 0. , 0.97727273, 0.02272727]), ' ', array([ 0., 0., 1., 0.])), ('HT6W47', ': ', array([ 0, 0, 46, 0]), ' ', array([ 0., 0., 1., 0.]), ' ', array([ 0., 0., 1., 0.])), ('HT6W48', ': ', array([ 0, 0, 28, 0]), ' ', array([ 0., 0., 1., 0.]), …	10110010	0.993422	0.419412	1	1
135	3	103689768	TAGxACG	A	G	[('HT6W37', ': ', array([35, 0, 0, 0]), ' ', array([ 1., 0., 0., 0.]), ' ', array([ 1., 0., 0., 0.])), ('HT6W45', ': ', array([41, 0, 2, 0]), ' ', array([ 0.95348837, 0. , 0.04651163, 0. ]), ' ', array([ 1., 0., 0., 0.])), ('HT6W47', ': ', array([38, 0, 0, 0]), ' ', array([ 1., 0., 0., 0.]), ' ', array([ 1., 0., 0., 0.])), ('HT6W48', ': ', array([28, 0, 0, 0]), ' ', array([ 1., 0., 0., 0.]), ' ',…	10110010	1	0.522946	1	1
136	3	104501068	ACTxTTT	C	A	[('HT6W37', ': ', array([ 0, 0, 46, 0]), ' ', array([ 0., 0., 1., 0.]), ' ', array([ 0., 0., 1., 0.])), ('HT6W45', ': ', array([ 0, 0, 33, 0]), ' ', array([ 0., 0., 1., 0.]), ' ', array([ 0., 0., 1., 0.])), ('HT6W47', ': ', array([ 0, 0, 36, 0]), ' ', array([ 0., 0., 1., 0.]), ' ', array([ 0., 0., 1., 0.])), ('HT6W48', ': ', array([ 0, 0, 50, 0]), ' ', array([ 0., 0., 1., 0.]), ' ', array([ 0., 0…	10110010	1	0.468916	1	1
137	3	110466502	AAGxATT	A	T	[('HT6W37', ': ', array([32, 0, 0, 0]), ' ', array([ 1., 0., 0., 0.]), ' ', array([ 1., 0., 0., 0.])), ('HT6W45', ': ', array([27, 0, 0, 0]), ' ', array([ 1., 0., 0., 0.]), ' ', array([ 1., 0., 0., 0.])), ('HT6W47', ': ', array([43, 0, 0, 0]), ' ', array([ 1., 0., 0., 0.]), ' ', array([ 1., 0., 0., 0.])), ('HT6W48', ': ', array([55, 0, 0, 2]), ' ', array([ 0.96491228, 0. , 0. , 0.03508772]), ' ',…	10110010	0.985988	0.461448	1	1
138	3	113006220	CCAxAAT	G	A	[('HT6W37', ': ', array([ 0, 0, 0, 40]), ' ', array([ 0., 0., 0., 1.]), ' ', array([ 0., 0., 0., 1.])), ('HT6W45', ': ', array([ 0, 0, 0, 41]), ' ', array([ 0., 0., 0., 1.]), ' ', array([ 0., 0., 0., 1.])), ('HT6W47', ': ', array([ 0, 0, 0, 37]), ' ', array([ 0., 0., 0., 1.]), ' ', array([ 0., 0., 0., 1.])), ('HT6W48', ': ', array([ 1, 0, 0, 55]), ' ', array([ 0.01785714, 0. , 0. , 0.98214286]), …	100010	0.992824	0.504681	1	1
139	3	113855883	TCCxATA	A	G	[('HT6W37', ': ', array([48, 0, 0, 0]), ' ', array([ 1., 0., 0., 0.]), ' ', array([ 1., 0., 0., 0.])), ('HT6W45', ': ', array([39, 1, 0, 0]), ' ', array([ 0.975, 0.025, 0. , 0. ]), ' ', array([ 1., 0., 0., 0.])), ('HT6W47', ': ', array([36, 0, 0, 0]), ' ', array([ 1., 0., 0., 0.]), ' ', array([ 1., 0., 0., 0.])), ('HT6W48', ': ', array([46, 0, 0, 0]), ' ', array([ 1., 0., 0., 0.]), ' ', array([ 1…	10110010	0.994169	0.472826	1	1
140	3	114700717	ATGxTTT	G	T	[('HT6W37', ': ', array([ 0, 0, 0, 43]), ' ', array([ 0., 0., 0., 1.]), ' ', array([ 0., 0., 0., 1.])), ('HT6W45', ': ', array([ 0, 0, 0, 51]), ' ', array([ 0., 0., 0., 1.]), ' ', array([ 0., 0., 0., 1.])), ('HT6W47', ': ', array([ 0, 0, 0, 32]), ' ', array([ 0., 0., 0., 1.]), ' ', array([ 0., 0., 0., 1.])), ('HT6W48', ': ', array([ 0, 0, 0, 30]), ' ', array([ 0., 0., 0., 1.]), ' ', array([ 0., 0…	100010	1	0.517033	1	1
141	3	116467594	ACCxAAC	A	G	[('HT6W37', ': ', array([29, 0, 0, 0]), ' ', array([ 1., 0., 0., 0.]), ' ', array([ 1., 0., 0., 0.])), ('HT6W45', ': ', array([22, 0, 0, 0]), ' ', array([ 1., 0., 0., 0.]), ' ', array([ 1., 0., 0., 0.])), ('HT6W47', ': ', array([33, 0, 0, 0]), ' ', array([ 1., 0., 0., 0.]), ' ', array([ 1., 0., 0., 0.])), ('HT6W48', ': ', array([44, 1, 0, 0]), ' ', array([ 0.97777778, 0.02222222, 0. , 0. ]), ' ',…	10110010	0.978558	0.448446	1	1
142	3	116606548	CTTxATT	C	A	[('HT6W37', ': ', array([ 0, 0, 35, 1]), ' ', array([ 0. , 0. , 0.97222222, 0.02777778]), ' ', array([ 0., 0., 1., 0.])), ('HT6W45', ': ', array([ 0, 0, 29, 0]), ' ', array([ 0., 0., 1., 0.]), ' ', array([ 0., 0., 1., 0.])), ('HT6W47', ': ', array([ 0, 0, 53, 0]), ' ', array([ 0., 0., 1., 0.]), ' ', array([ 0., 0., 1., 0.])), ('HT6W48', ': ', array([ 0, 0, 32, 0]), ' ', array([ 0., 0., 1., 0.]), …	10110010	0.996032	0.494916	1	1
143	3	127672544	CAAxCTA	A	C	[('HT6W37', ': ', array([34, 0, 0, 0]), ' ', array([ 1., 0., 0., 0.]), ' ', array([ 1., 0., 0., 0.])), ('HT6W45', ': ', array([34, 0, 0, 0]), ' ', array([ 1., 0., 0., 0.]), ' ', array([ 1., 0., 0., 0.])), ('HT6W47', ': ', array([44, 0, 0, 0]), ' ', array([ 1., 0., 0., 0.]), ' ', array([ 1., 0., 0., 0.])), ('HT6W48', ': ', array([40, 0, 0, 0]), ' ', array([ 1., 0., 0., 0.]), ' ', array([ 1., 0., 0…	10110010	1	0.437773	1	1
144	3	131923799	TGGxCTA	C	T	[('HT6W37', ': ', array([ 0, 0, 41, 0]), ' ', array([ 0., 0., 1., 0.]), ' ', array([ 0., 0., 1., 0.])), ('HT6W45', ': ', array([ 0, 0, 29, 0]), ' ', array([ 0., 0., 1., 0.]), ' ', array([ 0., 0., 1., 0.])), ('HT6W47', ': ', array([ 0, 0, 47, 0]), ' ', array([ 0., 0., 1., 0.]), ' ', array([ 0., 0., 1., 0.])), ('HT6W48', ': ', array([ 0, 1, 40, 0]), ' ', array([ 0. , 0.02439024, 0.97560976, 0. ]), …	10110010	0.988864	0.461293	1	1
145	3	137137049	TACxATT	C	A	[('HT6W37', ': ', array([ 0, 1, 46, 0]), ' ', array([ 0. , 0.0212766, 0.9787234, 0. ]), ' ', array([ 0., 0., 1., 0.])), ('HT6W45', ': ', array([ 0, 0, 39, 0]), ' ', array([ 0., 0., 1., 0.]), ' ', array([ 0., 0., 1., 0.])), ('HT6W47', ': ', array([ 0, 1, 51, 0]), ' ', array([ 0. , 0.01923077, 0.98076923, 0. ]), ' ', array([ 0., 0., 1., 0.])), ('HT6W48', ': ', array([ 3, 0, 45, 0]), ' ', array([ 0.…	10110010	0.985285	0.328178	1	1
146	3	140401141	AAAxGGT	C	T	[('HT6W37', ': ', array([ 0, 0, 41, 0]), ' ', array([ 0., 0., 1., 0.]), ' ', array([ 0., 0., 1., 0.])), ('HT6W45', ': ', array([ 0, 0, 25, 0]), ' ', array([ 0., 0., 1., 0.]), ' ', array([ 0., 0., 1., 0.])), ('HT6W47', ': ', array([ 0, 0, 42, 0]), ' ', array([ 0., 0., 1., 0.]), ' ', array([ 0., 0., 1., 0.])), ('HT6W48', ': ', array([ 0, 0, 41, 0]), ' ', array([ 0., 0., 1., 0.]), ' ', array([ 0., 0…	10110010	0.996599	0.481159	1	1
147	3	140426244	ATTxCCG	C	T	[('HT6W37', ': ', array([ 0, 0, 37, 0]), ' ', array([ 0., 0., 1., 0.]), ' ', array([ 0., 0., 1., 0.])), ('HT6W45', ': ', array([ 0, 0, 38, 0]), ' ', array([ 0., 0., 1., 0.]), ' ', array([ 0., 0., 1., 0.])), ('HT6W47', ': ', array([ 0, 0, 41, 0]), ' ', array([ 0., 0., 1., 0.]), ' ', array([ 0., 0., 1., 0.])), ('HT6W48', ': ', array([ 0, 0, 47, 0]), ' ', array([ 0., 0., 1., 0.]), ' ', array([ 0., 0…	10110010	0.993444	0.521383	1	1
148	3	146891589	TGTxTTA	C	A	[('HT6W37', ': ', array([ 0, 0, 37, 0]), ' ', array([ 0., 0., 1., 0.]), ' ', array([ 0., 0., 1., 0.])), ('HT6W45', ': ', array([ 0, 0, 44, 0]), ' ', array([ 0., 0., 1., 0.]), ' ', array([ 0., 0., 1., 0.])), ('HT6W47', ': ', array([ 1, 0, 45, 0]), ' ', array([ 0.02173913, 0. , 0.97826087, 0. ]), ' ', array([ 0., 0., 1., 0.])), ('HT6W48', ': ', array([ 0, 0, 33, 0]), ' ', array([ 0., 0., 1., 0.]), …	10110010	0.988958	0.498113	1	1
149	3	147223249	AAGxCAC	A	G	[('HT6W37', ': ', array([33, 0, 0, 0]), ' ', array([ 1., 0., 0., 0.]), ' ', array([ 1., 0., 0., 0.])), ('HT6W45', ': ', array([47, 0, 0, 0]), ' ', array([ 1., 0., 0., 0.]), ' ', array([ 1., 0., 0., 0.])), ('HT6W47', ': ', array([39, 0, 0, 1]), ' ', array([ 0.975, 0. , 0. , 0.025]), ' ', array([ 1., 0., 0., 0.])), ('HT6W48', ': ', array([42, 0, 0, 0]), ' ', array([ 1., 0., 0., 0.]), ' ', array([ 1…	10110010	0.987468	0.491359	1	1
150	3	147230714	ATAxTAT	A	C	[('HT6W37', ': ', array([50, 0, 0, 0]), ' ', array([ 1., 0., 0., 0.]), ' ', array([ 1., 0., 0., 0.])), ('HT6W45', ': ', array([45, 0, 0, 0]), ' ', array([ 1., 0., 0., 0.]), ' ', array([ 1., 0., 0., 0.])), ('HT6W47', ': ', array([41, 0, 1, 0]), ' ', array([ 0.97619048, 0. , 0.02380952, 0. ]), ' ', array([ 1., 0., 0., 0.])), ('HT6W48', ': ', array([51, 0, 0, 0]), ' ', array([ 1., 0., 0., 0.]), ' ',…	100010	0.992607	0.438239	1	1
151	3	157435377	TGGxGAT	A	G	[('HT6W37', ': ', array([44, 0, 1, 0]), ' ', array([ 0.97777778, 0. , 0.02222222, 0. ]), ' ', array([ 1., 0., 0., 0.])), ('HT6W45', ': ', array([37, 0, 0, 0]), ' ', array([ 1., 0., 0., 0.]), ' ', array([ 1., 0., 0., 0.])), ('HT6W47', ': ', array([47, 0, 0, 0]), ' ', array([ 1., 0., 0., 0.]), ' ', array([ 1., 0., 0., 0.])), ('HT6W48', ': ', array([39, 0, 0, 0]), ' ', array([ 1., 0., 0., 0.]), ' ',…	10110010	0.993579	0.453717	1	1
152	3	163115399	ATAxGTG	C	T	[('HT6W37', ': ', array([ 0, 0, 31, 0]), ' ', array([ 0., 0., 1., 0.]), ' ', array([ 0., 0., 1., 0.])), ('HT6W45', ': ', array([ 0, 0, 29, 0]), ' ', array([ 0., 0., 1., 0.]), ' ', array([ 0., 0., 1., 0.])), ('HT6W47', ': ', array([ 1, 0, 41, 0]), ' ', array([ 0.02380952, 0. , 0.97619048, 0. ]), ' ', array([ 0., 0., 1., 0.])), ('HT6W48', ': ', array([ 0, 0, 36, 0]), ' ', array([ 0., 0., 1., 0.]), …	10110010	0.992936	0.524018	1	1
153	3	163859212	AATxAAT	A	G	[('HT6W37', ': ', array([43, 0, 0, 0]), ' ', array([ 1., 0., 0., 0.]), ' ', array([ 1., 0., 0., 0.])), ('HT6W45', ': ', array([27, 0, 0, 0]), ' ', array([ 1., 0., 0., 0.]), ' ', array([ 1., 0., 0., 0.])), ('HT6W47', ': ', array([26, 0, 0, 0]), ' ', array([ 1., 0., 0., 0.]), ' ', array([ 1., 0., 0., 0.])), ('HT6W48', ': ', array([47, 0, 0, 0]), ' ', array([ 1., 0., 0., 0.]), ' ', array([ 1., 0., 0…	10110010	1	0.465566	1	1
154	3	166053346	ATAxGTT	A	C	[('HT6W37', ': ', array([29, 0, 0, 0]), ' ', array([ 1., 0., 0., 0.]), ' ', array([ 1., 0., 0., 0.])), ('HT6W45', ': ', array([24, 0, 0, 0]), ' ', array([ 1., 0., 0., 0.]), ' ', array([ 1., 0., 0., 0.])), ('HT6W47', ': ', array([35, 0, 0, 0]), ' ', array([ 1., 0., 0., 0.]), ' ', array([ 1., 0., 0., 0.])), ('HT6W48', ': ', array([45, 0, 0, 0]), ' ', array([ 1., 0., 0., 0.]), ' ', array([ 1., 0., 0…	100010	0.985503	0.643408	1	1
155	3	173789889	AGAxAAG	A	G	[('HT6W37', ': ', array([45, 0, 1, 0]), ' ', array([ 0.97826087, 0. , 0.02173913, 0. ]), ' ', array([ 1., 0., 0., 0.])), ('HT6W45', ': ', array([48, 0, 0, 0]), ' ', array([ 1., 0., 0., 0.]), ' ', array([ 1., 0., 0., 0.])), ('HT6W47', ': ', array([42, 0, 0, 0]), ' ', array([ 1., 0., 0., 0.]), ' ', array([ 1., 0., 0., 0.])), ('HT6W48', ': ', array([52, 0, 0, 0]), ' ', array([ 1., 0., 0., 0.]), ' ',…	10110010	0.996894	0.538954	1	1
156	3	175524922	CAGxAAC	A	G	[('HT6W37', ': ', array([38, 0, 0, 0]), ' ', array([ 1., 0., 0., 0.]), ' ', array([ 1., 0., 0., 0.])), ('HT6W45', ': ', array([36, 0, 0, 0]), ' ', array([ 1., 0., 0., 0.]), ' ', array([ 1., 0., 0., 0.])), ('HT6W47', ': ', array([31, 0, 0, 0]), ' ', array([ 1., 0., 0., 0.]), ' ', array([ 1., 0., 0., 0.])), ('HT6W48', ': ', array([33, 0, 0, 0]), ' ', array([ 1., 0., 0., 0.]), ' ', array([ 1., 0., 0…	10110010	1	0.502332	1	1
157	3	180343277	GGCxTTT	A	G	[('HT6W37', ': ', array([27, 0, 0, 0]), ' ', array([ 1., 0., 0., 0.]), ' ', array([ 1., 0., 0., 0.])), ('HT6W45', ': ', array([18, 0, 0, 0]), ' ', array([ 1., 0., 0., 0.]), ' ', array([ 1., 0., 0., 0.])), ('HT6W47', ': ', array([45, 2, 1, 1]), ' ', array([ 0.91836735, 0.04081633, 0.02040816, 0.02040816]), ' ', array([ 1., 0., 0., 0.])), ('HT6W48', ': ', array([42, 1, 0, 0]), ' ', array([ 0.976744…	10110010	0.985016	0.484466	1	1
158	3	180562440	TATxTTT	C	A	[('HT6W37', ': ', array([ 0, 0, 42, 0]), ' ', array([ 0., 0., 1., 0.]), ' ', array([ 0., 0., 1., 0.])), ('HT6W45', ': ', array([ 0, 1, 36, 0]), ' ', array([ 0. , 0.02702703, 0.97297297, 0. ]), ' ', array([ 0., 0., 1., 0.])), ('HT6W47', ': ', array([ 0, 0, 34, 0]), ' ', array([ 0., 0., 1., 0.]), ' ', array([ 0., 0., 1., 0.])), ('HT6W48', ': ', array([ 0, 0, 44, 0]), ' ', array([ 0., 0., 1., 0.]), …	100010	1	0.516234	1	1
159	3	181431365	CTAxTTT	T	G	[('HT6W37', ': ', array([ 0, 33, 0, 0]), ' ', array([ 0., 1., 0., 0.]), ' ', array([ 0., 1., 0., 0.])), ('HT6W45', ': ', array([ 0, 21, 0, 0]), ' ', array([ 0., 1., 0., 0.]), ' ', array([ 0., 1., 0., 0.])), ('HT6W47', ': ', array([ 0, 31, 0, 0]), ' ', array([ 0., 1., 0., 0.]), ' ', array([ 0., 1., 0., 0.])), ('HT6W48', ': ', array([ 0, 29, 0, 0]), ' ', array([ 0., 1., 0., 0.]), ' ', array([ 0., 1…	10110010	0.994048	0.473846	0.999997	1
160	4	6266204	GGTxTTG	C	A	[('HT6W37', ': ', array([ 0, 0, 39, 0]), ' ', array([ 0., 0., 1., 0.]), ' ', array([ 0., 0., 1., 0.])), ('HT6W45', ': ', array([ 0, 0, 47, 0]), ' ', array([ 0., 0., 1., 0.]), ' ', array([ 0., 0., 1., 0.])), ('HT6W47', ': ', array([ 0, 0, 44, 0]), ' ', array([ 0., 0., 1., 0.]), ' ', array([ 0., 0., 1., 0.])), ('HT6W48', ': ', array([ 0, 0, 45, 0]), ' ', array([ 0., 0., 1., 0.]), ' ', array([ 0., 0…	100010	0.994949	0.495858	1	1
161	4	11442686	TTTxTTC	C	A	[('HT6W37', ': ', array([ 0, 0, 38, 0]), ' ', array([ 0., 0., 1., 0.]), ' ', array([ 0., 0., 1., 0.])), ('HT6W45', ': ', array([ 0, 0, 38, 0]), ' ', array([ 0., 0., 1., 0.]), ' ', array([ 0., 0., 1., 0.])), ('HT6W47', ': ', array([ 0, 1, 51, 0]), ' ', array([ 0. , 0.01923077, 0.98076923, 0. ]), ' ', array([ 0., 0., 1., 0.])), ('HT6W48', ': ', array([ 0, 0, 43, 0]), ' ', array([ 0., 0., 1., 0.]), …	100010	0.991746	0.503175	1	1
162	4	12944513	ACCxCTA	A	G	[('HT6W37', ': ', array([31, 0, 0, 0]), ' ', array([ 1., 0., 0., 0.]), ' ', array([ 1., 0., 0., 0.])), ('HT6W45', ': ', array([32, 1, 0, 0]), ' ', array([ 0.96969697, 0.03030303, 0. , 0. ]), ' ', array([ 1., 0., 0., 0.])), ('HT6W47', ': ', array([42, 1, 0, 0]), ' ', array([ 0.97674419, 0.02325581, 0. , 0. ]), ' ', array([ 1., 0., 0., 0.])), ('HT6W48', ': ', array([45, 0, 0, 0]), ' ', array([ 1., …	10110010	0.989709	0.501626	1	1
163	4	13687927	ATTxTTT	C	A	[('HT6W37', ': ', array([ 0, 1, 47, 0]), ' ', array([ 0. , 0.02083333, 0.97916667, 0. ]), ' ', array([ 0., 0., 1., 0.])), ('HT6W45', ': ', array([ 0, 0, 35, 0]), ' ', array([ 0., 0., 1., 0.]), ' ', array([ 0., 0., 1., 0.])), ('HT6W47', ': ', array([ 0, 0, 29, 0]), ' ', array([ 0., 0., 1., 0.]), ' ', array([ 0., 0., 1., 0.])), ('HT6W48', ': ', array([ 0, 0, 49, 0]), ' ', array([ 0., 0., 1., 0.]), …	100010	0.993569	0.512597	1	1
164	4	18583248	TTGxATA	A	C	[('HT6W37', ': ', array([40, 0, 0, 0]), ' ', array([ 1., 0., 0., 0.]), ' ', array([ 1., 0., 0., 0.])), ('HT6W45', ': ', array([40, 0, 0, 0]), ' ', array([ 1., 0., 0., 0.]), ' ', array([ 1., 0., 0., 0.])), ('HT6W47', ': ', array([47, 0, 0, 0]), ' ', array([ 1., 0., 0., 0.]), ' ', array([ 1., 0., 0., 0.])), ('HT6W48', ': ', array([37, 0, 0, 0]), ' ', array([ 1., 0., 0., 0.]), ' ', array([ 1., 0., 0…	10110010	0.995392	0.559277	1	1
165	4	18815587	AATxTGC	T	G	[('HT6W37', ': ', array([ 0, 32, 0, 0]), ' ', array([ 0., 1., 0., 0.]), ' ', array([ 0., 1., 0., 0.])), ('HT6W45', ': ', array([ 0, 32, 0, 0]), ' ', array([ 0., 1., 0., 0.]), ' ', array([ 0., 1., 0., 0.])), ('HT6W47', ': ', array([ 0, 25, 1, 0]), ' ', array([ 0. , 0.96153846, 0.03846154, 0. ]), ' ', array([ 0., 1., 0., 0.])), ('HT6W48', ': ', array([ 0, 51, 0, 0]), ' ', array([ 0., 1., 0., 0.]), …	100010	0.991895	0.476148	1	1
166	4	18857228	GTAxTCC	A	C	[('HT6W37', ': ', array([28, 0, 0, 0]), ' ', array([ 1., 0., 0., 0.]), ' ', array([ 1., 0., 0., 0.])), ('HT6W45', ': ', array([36, 0, 0, 1]), ' ', array([ 0.97297297, 0. , 0. , 0.02702703]), ' ', array([ 1., 0., 0., 0.])), ('HT6W47', ': ', array([29, 0, 0, 0]), ' ', array([ 1., 0., 0., 0.]), ' ', array([ 1., 0., 0., 0.])), ('HT6W48', ': ', array([35, 0, 0, 0]), ' ', array([ 1., 0., 0., 0.]), ' ',…	10110010	0.996825	0.436202	1	1
167	4	24764436	TTAxAAT	C	A	[('HT6W37', ': ', array([ 0, 0, 49, 0]), ' ', array([ 0., 0., 1., 0.]), ' ', array([ 0., 0., 1., 0.])), ('HT6W45', ': ', array([ 0, 0, 31, 0]), ' ', array([ 0., 0., 1., 0.]), ' ', array([ 0., 0., 1., 0.])), ('HT6W47', ': ', array([ 0, 0, 51, 0]), ' ', array([ 0., 0., 1., 0.]), ' ', array([ 0., 0., 1., 0.])), ('HT6W48', ': ', array([ 0, 0, 46, 0]), ' ', array([ 0., 0., 1., 0.]), ' ', array([ 0., 0…	100010	0.995457	0.404167	1	1
168	4	26213701	GATxTCA	C	A	[('HT6W37', ': ', array([ 0, 0, 38, 0]), ' ', array([ 0., 0., 1., 0.]), ' ', array([ 0., 0., 1., 0.])), ('HT6W45', ': ', array([ 0, 0, 33, 0]), ' ', array([ 0., 0., 1., 0.]), ' ', array([ 0., 0., 1., 0.])), ('HT6W47', ': ', array([ 0, 0, 45, 0]), ' ', array([ 0., 0., 1., 0.]), ' ', array([ 0., 0., 1., 0.])), ('HT6W48', ': ', array([ 0, 0, 38, 0]), ' ', array([ 0., 0., 1., 0.]), ' ', array([ 0., 0…	100010	1	0.554998	1	1
169	4	27896676	ATGxACA	A	C	[('HT6W37', ': ', array([34, 0, 0, 0]), ' ', array([ 1., 0., 0., 0.]), ' ', array([ 1., 0., 0., 0.])), ('HT6W45', ': ', array([26, 0, 0, 0]), ' ', array([ 1., 0., 0., 0.]), ' ', array([ 1., 0., 0., 0.])), ('HT6W47', ': ', array([32, 0, 0, 0]), ' ', array([ 1., 0., 0., 0.]), ' ', array([ 1., 0., 0., 0.])), ('HT6W48', ': ', array([32, 0, 0, 0]), ' ', array([ 1., 0., 0., 0.]), ' ', array([ 1., 0., 0…	100010	1	0.434803	0.998042	1
170	4	28684950	TATxTAA	T	G	[('HT6W37', ': ', array([ 0, 39, 0, 0]), ' ', array([ 0., 1., 0., 0.]), ' ', array([ 0., 1., 0., 0.])), ('HT6W45', ': ', array([ 0, 42, 0, 0]), ' ', array([ 0., 1., 0., 0.]), ' ', array([ 0., 1., 0., 0.])), ('HT6W47', ': ', array([ 0, 57, 0, 0]), ' ', array([ 0., 1., 0., 0.]), ' ', array([ 0., 1., 0., 0.])), ('HT6W48', ': ', array([ 0, 33, 0, 1]), ' ', array([ 0. , 0.97058824, 0. , 0.02941176]), …	100010	0.993808	0.440039	1	1
171	4	32528554	AAAxACG	G	T	[('HT6W37', ': ', array([ 0, 0, 0, 46]), ' ', array([ 0., 0., 0., 1.]), ' ', array([ 0., 0., 0., 1.])), ('HT6W45', ': ', array([ 0, 0, 0, 37]), ' ', array([ 0., 0., 0., 1.]), ' ', array([ 0., 0., 0., 1.])), ('HT6W47', ': ', array([ 0, 0, 0, 52]), ' ', array([ 0., 0., 0., 1.]), ' ', array([ 0., 0., 0., 1.])), ('HT6W48', ': ', array([ 1, 0, 0, 41]), ' ', array([ 0.02380952, 0. , 0. , 0.97619048]), …	100010	0.990078	0.375	1	1
172	4	32918631	ATTxTCA	C	T	[('HT6W37', ': ', array([ 0, 0, 37, 0]), ' ', array([ 0., 0., 1., 0.]), ' ', array([ 0., 0., 1., 0.])), ('HT6W45', ': ', array([ 0, 0, 36, 0]), ' ', array([ 0., 0., 1., 0.]), ' ', array([ 0., 0., 1., 0.])), ('HT6W47', ': ', array([ 1, 0, 42, 0]), ' ', array([ 0.02325581, 0. , 0.97674419, 0. ]), ' ', array([ 0., 0., 1., 0.])), ('HT6W48', ': ', array([ 0, 0, 56, 1]), ' ', array([ 0. , 0. , 0.982456…	100010	0.991994	0.544314	1	1
173	4	36523689	CAAxGAC	A	C	[('HT6W37', ': ', array([30, 0, 0, 0]), ' ', array([ 1., 0., 0., 0.]), ' ', array([ 1., 0., 0., 0.])), ('HT6W45', ': ', array([27, 0, 0, 0]), ' ', array([ 1., 0., 0., 0.]), ' ', array([ 1., 0., 0., 0.])), ('HT6W47', ': ', array([53, 0, 0, 0]), ' ', array([ 1., 0., 0., 0.]), ' ', array([ 1., 0., 0., 0.])), ('HT6W48', ': ', array([33, 0, 0, 0]), ' ', array([ 1., 0., 0., 0.]), ' ', array([ 1., 0., 0…	10110010	0.990148	0.560851	1	1
174	4	36638528	GGTxCAG	T	C	[('HT6W37', ': ', array([ 0, 49, 1, 0]), ' ', array([ 0. , 0.98, 0.02, 0. ]), ' ', array([ 0., 1., 0., 0.])), ('HT6W45', ': ', array([ 0, 24, 0, 0]), ' ', array([ 0., 1., 0., 0.]), ' ', array([ 0., 1., 0., 0.])), ('HT6W47', ': ', array([ 0, 32, 0, 0]), ' ', array([ 0., 1., 0., 0.]), ' ', array([ 0., 1., 0., 0.])), ('HT6W48', ': ', array([ 0, 39, 0, 0]), ' ', array([ 0., 1., 0., 0.]), ' ', array([…	10110010	0.993175	0.490545	1	1
175	4	43958851	AGGxGCT	T	C	[('HT6W37', ': ', array([ 0, 30, 0, 0]), ' ', array([ 0., 1., 0., 0.]), ' ', array([ 0., 1., 0., 0.])), ('HT6W45', ': ', array([ 0, 34, 1, 1]), ' ', array([ 0. , 0.94444444, 0.02777778, 0.02777778]), ' ', array([ 0., 1., 0., 0.])), ('HT6W47', ': ', array([ 0, 44, 0, 0]), ' ', array([ 0., 1., 0., 0.]), ' ', array([ 0., 1., 0., 0.])), ('HT6W48', ': ', array([ 0, 34, 0, 0]), ' ', array([ 0., 1., 0.,…	100010	1	0.470653	1	1
176	4	47119696	AAAxGTA	T	C	[('HT6W37', ': ', array([ 0, 35, 0, 0]), ' ', array([ 0., 1., 0., 0.]), ' ', array([ 0., 1., 0., 0.])), ('HT6W45', ': ', array([ 0, 41, 0, 0]), ' ', array([ 0., 1., 0., 0.]), ' ', array([ 0., 1., 0., 0.])), ('HT6W47', ': ', array([ 0, 55, 0, 0]), ' ', array([ 0., 1., 0., 0.]), ' ', array([ 0., 1., 0., 0.])), ('HT6W48', ': ', array([ 0, 52, 0, 0]), ' ', array([ 0., 1., 0., 0.]), ' ', array([ 0., 1…	10110010	0.997085	0.521785	1	1
177	4	49173098	CTCxTTG	C	A	[('HT6W37', ': ', array([ 0, 0, 115, 0]), ' ', array([ 0., 0., 1., 0.]), ' ', array([ 0., 0., 1., 0.])), ('HT6W45', ': ', array([ 0, 0, 106, 0]), ' ', array([ 0., 0., 1., 0.]), ' ', array([ 0., 0., 1., 0.])), ('HT6W47', ': ', array([ 0, 0, 104, 0]), ' ', array([ 0., 0., 1., 0.]), ' ', array([ 0., 0., 1., 0.])), ('HT6W48', ': ', array([ 0, 0, 129, 0]), ' ', array([ 0., 0., 1., 0.]), ' ', array([ 0…	100010	0.998962	0.119643	1	1
178	4	54508783	AGAxCAT	G	T	[('HT6W37', ': ', array([ 0, 0, 0, 39]), ' ', array([ 0., 0., 0., 1.]), ' ', array([ 0., 0., 0., 1.])), ('HT6W45', ': ', array([ 0, 0, 0, 33]), ' ', array([ 0., 0., 0., 1.]), ' ', array([ 0., 0., 0., 1.])), ('HT6W47', ': ', array([ 0, 0, 0, 46]), ' ', array([ 0., 0., 0., 1.]), ' ', array([ 0., 0., 0., 1.])), ('HT6W48', ': ', array([ 0, 0, 0, 43]), ' ', array([ 0., 0., 0., 1.]), ' ', array([ 0., 0…	10110010	1	0.522566	1	1
179	4	54527071	AAAxAAG	A	C	[('HT6W37', ': ', array([47, 0, 0, 0]), ' ', array([ 1., 0., 0., 0.]), ' ', array([ 1., 0., 0., 0.])), ('HT6W45', ': ', array([38, 0, 0, 0]), ' ', array([ 1., 0., 0., 0.]), ' ', array([ 1., 0., 0., 0.])), ('HT6W47', ': ', array([42, 0, 0, 0]), ' ', array([ 1., 0., 0., 0.]), ' ', array([ 1., 0., 0., 0.])), ('HT6W48', ': ', array([51, 0, 0, 0]), ' ', array([ 1., 0., 0., 0.]), ' ', array([ 1., 0., 0…	10110010	0.991071	0.441273	0.999999	1
180	4	57486677	CCCxAGT	G	A	[('HT6W37', ': ', array([ 0, 0, 0, 54]), ' ', array([ 0., 0., 0., 1.]), ' ', array([ 0., 0., 0., 1.])), ('HT6W45', ': ', array([ 0, 0, 0, 30]), ' ', array([ 0., 0., 0., 1.]), ' ', array([ 0., 0., 0., 1.])), ('HT6W47', ': ', array([ 0, 0, 1, 40]), ' ', array([ 0. , 0. , 0.02439024, 0.97560976]), ' ', array([ 0., 0., 0., 1.])), ('HT6W48', ': ', array([ 0, 0, 0, 34]), ' ', array([ 0., 0., 0., 1.]), …	10110010	0.990743	0.435329	1	1
181	4	61533342	AAAxGAA	A	C	[('HT6W37', ': ', array([30, 0, 0, 0]), ' ', array([ 1., 0., 0., 0.]), ' ', array([ 1., 0., 0., 0.])), ('HT6W45', ': ', array([41, 0, 0, 0]), ' ', array([ 1., 0., 0., 0.]), ' ', array([ 1., 0., 0., 0.])), ('HT6W47', ': ', array([39, 0, 0, 0]), ' ', array([ 1., 0., 0., 0.]), ' ', array([ 1., 0., 0., 0.])), ('HT6W48', ': ', array([35, 0, 0, 0]), ' ', array([ 1., 0., 0., 0.]), ' ', array([ 1., 0., 0…	10110010	1	0.39896	1	1
182	4	68409658	CACxATT	T	C	[('HT6W37', ': ', array([ 1, 33, 0, 0]), ' ', array([ 0.02941176, 0.97058824, 0. , 0. ]), ' ', array([ 0., 1., 0., 0.])), ('HT6W45', ': ', array([ 0, 45, 0, 0]), ' ', array([ 0., 1., 0., 0.]), ' ', array([ 0., 1., 0., 0.])), ('HT6W47', ': ', array([ 0, 44, 0, 0]), ' ', array([ 0., 1., 0., 0.]), ' ', array([ 0., 1., 0., 0.])), ('HT6W48', ': ', array([ 0, 45, 0, 0]), ' ', array([ 0., 1., 0., 0.]), …	10110010	0.995798	0.466945	1	1
183	4	68689867	TTTxTTT	T	G	[('HT6W37', ': ', array([ 0, 38, 0, 0]), ' ', array([ 0., 1., 0., 0.]), ' ', array([ 0., 1., 0., 0.])), ('HT6W45', ': ', array([ 0, 36, 0, 0]), ' ', array([ 0., 1., 0., 0.]), ' ', array([ 0., 1., 0., 0.])), ('HT6W47', ': ', array([ 0, 53, 0, 0]), ' ', array([ 0., 1., 0., 0.]), ' ', array([ 0., 1., 0., 0.])), ('HT6W48', ': ', array([ 0, 45, 0, 0]), ' ', array([ 0., 1., 0., 0.]), ' ', array([ 0., 1…	100010	1	0.561735	1	1
184	4	69327018	CAGxAAA	A	G	[('HT6W37', ': ', array([53, 0, 0, 1]), ' ', array([ 0.98148148, 0. , 0. , 0.01851852]), ' ', array([ 1., 0., 0., 0.])), ('HT6W45', ': ', array([28, 0, 0, 0]), ' ', array([ 1., 0., 0., 0.]), ' ', array([ 1., 0., 0., 0.])), ('HT6W47', ': ', array([39, 0, 0, 0]), ' ', array([ 1., 0., 0., 0.]), ' ', array([ 1., 0., 0., 0.])), ('HT6W48', ': ', array([36, 0, 0, 0]), ' ', array([ 1., 0., 0., 0.]), ' ',…	10110010	0.994848	0.456212	1	1
185	4	69667298	ACAxCTA	T	A	[('HT6W37', ': ', array([ 0, 37, 0, 0]), ' ', array([ 0., 1., 0., 0.]), ' ', array([ 0., 1., 0., 0.])), ('HT6W45', ': ', array([ 0, 44, 0, 0]), ' ', array([ 0., 1., 0., 0.]), ' ', array([ 0., 1., 0., 0.])), ('HT6W47', ': ', array([ 0, 34, 0, 0]), ' ', array([ 0., 1., 0., 0.]), ' ', array([ 0., 1., 0., 0.])), ('HT6W48', ': ', array([ 0, 42, 0, 0]), ' ', array([ 0., 1., 0., 0.]), ' ', array([ 0., 1…	10110010	0.991673	0.497041	1	1
186	4	104297746	CTCxTGT	T	A	[('HT6W37', ': ', array([ 0, 15, 0, 0]), ' ', array([ 0., 1., 0., 0.]), ' ', array([ 0., 1., 0., 0.])), ('HT6W45', ': ', array([ 0, 22, 0, 0]), ' ', array([ 0., 1., 0., 0.]), ' ', array([ 0., 1., 0., 0.])), ('HT6W47', ': ', array([ 0, 25, 0, 0]), ' ', array([ 0., 1., 0., 0.]), ' ', array([ 0., 1., 0., 0.])), ('HT6W48', ': ', array([ 0, 25, 0, 0]), ' ', array([ 0., 1., 0., 0.]), ' ', array([ 0., 1…	100010	0.987233	0.982143	1	1
187	4	124766526	ATAxAAT	T	G	[('HT6W37', ': ', array([ 0, 12, 0, 0]), ' ', array([ 0., 1., 0., 0.]), ' ', array([ 0., 1., 0., 0.])), ('HT6W45', ': ', array([ 0, 13, 0, 0]), ' ', array([ 0., 1., 0., 0.]), ' ', array([ 0., 1., 0., 0.])), ('HT6W47', ': ', array([ 0, 18, 0, 0]), ' ', array([ 0., 1., 0., 0.]), ' ', array([ 0., 1., 0., 0.])), ('HT6W48', ': ', array([ 0, 26, 0, 1]), ' ', array([ 0. , 0.96296296, 0. , 0.03703704]), …	100010	0.984825	1	1	1
188	4	127398638	TGAxATC	G	T	[('HT6W37', ': ', array([ 0, 0, 0, 18]), ' ', array([ 0., 0., 0., 1.]), ' ', array([ 0., 0., 0., 1.])), ('HT6W45', ': ', array([ 0, 0, 0, 10]), ' ', array([ 0., 0., 0., 1.]), ' ', array([ 0., 0., 0., 1.])), ('HT6W47', ': ', array([ 0, 0, 0, 24]), ' ', array([ 0., 0., 0., 1.]), ' ', array([ 0., 0., 0., 1.])), ('HT6W48', ': ', array([ 0, 0, 0, 23]), ' ', array([ 0., 0., 0., 1.]), ' ', array([ 0., 0…	10110010	0.98555	0.980769	1	1
189	4	130766794	GGAxAAA	C	A	[('HT6W37', ': ', array([ 0, 0, 40, 0]), ' ', array([ 0., 0., 1., 0.]), ' ', array([ 0., 0., 1., 0.])), ('HT6W45', ': ', array([ 1, 0, 36, 0]), ' ', array([ 0.02702703, 0. , 0.97297297, 0. ]), ' ', array([ 0., 0., 1., 0.])), ('HT6W47', ': ', array([ 0, 0, 34, 0]), ' ', array([ 0., 0., 1., 0.]), ' ', array([ 0., 0., 1., 0.])), ('HT6W48', ': ', array([ 0, 1, 53, 0]), ' ', array([ 0. , 0.01851852, 0…	10110010	0.983696	0.515193	1	1
190	4	132817740	CATxCTC	T	C	[('HT6W37', ': ', array([ 0, 45, 0, 0]), ' ', array([ 0. , 0.97826087, 0. , 0. ]), ' ', array([ 0., 1., 0., 0.])), ('HT6W45', ': ', array([ 0, 27, 0, 0]), ' ', array([ 0., 1., 0., 0.]), ' ', array([ 0., 1., 0., 0.])), ('HT6W47', ': ', array([ 0, 41, 0, 0]), ' ', array([ 0., 1., 0., 0.]), ' ', array([ 0., 1., 0., 0.])), ('HT6W48', ': ', array([ 0, 45, 0, 0]), ' ', array([ 0., 1., 0., 0.]), ' ', ar…	100010	0.991303	0.565966	1	1
191	4	134067403	ACAxAAT	G	T	[('HT6W37', ': ', array([ 1, 0, 1, 26]), ' ', array([ 0.03571429, 0. , 0.03571429, 0.92857143]), ' ', array([ 0., 0., 0., 1.])), ('HT6W45', ': ', array([ 0, 0, 0, 35]), ' ', array([ 0., 0., 0., 1.]), ' ', array([ 0., 0., 0., 1.])), ('HT6W47', ': ', array([ 0, 0, 0, 46]), ' ', array([ 0., 0., 0., 1.]), ' ', array([ 0., 0., 0., 1.])), ('HT6W48', ': ', array([ 0, 0, 0, 36]), ' ', array([ 0., 0., 0.,…	10110010	0.989796	0.457157	1	1
192	4	134647024	ATAxATT	A	C	[('HT6W37', ': ', array([31, 0, 0, 0]), ' ', array([ 1., 0., 0., 0.]), ' ', array([ 1., 0., 0., 0.])), ('HT6W45', ': ', array([27, 0, 0, 0]), ' ', array([ 1., 0., 0., 0.]), ' ', array([ 1., 0., 0., 0.])), ('HT6W47', ': ', array([51, 0, 0, 0]), ' ', array([ 1., 0., 0., 0.]), ' ', array([ 1., 0., 0., 0.])), ('HT6W48', ': ', array([45, 0, 0, 0]), ' ', array([ 1., 0., 0., 0.]), ' ', array([ 1., 0., 0…	10110010	1	0.519001	1	1
193	4	137737042	ATAxTAT	A	C	[('HT6W37', ': ', array([32, 0, 0, 0]), ' ', array([ 1., 0., 0., 0.]), ' ', array([ 1., 0., 0., 0.])), ('HT6W45', ': ', array([39, 0, 0, 1]), ' ', array([ 0.975, 0. , 0. , 0.025]), ' ', array([ 1., 0., 0., 0.])), ('HT6W47', ': ', array([32, 0, 0, 0]), ' ', array([ 1., 0., 0., 0.]), ' ', array([ 1., 0., 0., 0.])), ('HT6W48', ': ', array([44, 0, 0, 0]), ' ', array([ 1., 0., 0., 0.]), ' ', array([ 1…	10110010	1	0.518567	1	1
194	4	138243897	GAAxAAA	G	T	[('HT6W37', ': ', array([ 0, 0, 0, 40]), ' ', array([ 0., 0., 0., 1.]), ' ', array([ 0., 0., 0., 1.])), ('HT6W45', ': ', array([ 0, 1, 0, 29]), ' ', array([ 0. , 0.03333333, 0. , 0.96666667]), ' ', array([ 0., 0., 0., 1.])), ('HT6W47', ': ', array([ 1, 0, 0, 48]), ' ', array([ 0.02040816, 0. , 0. , 0.97959184]), ' ', array([ 0., 0., 0., 1.])), ('HT6W48', ': ', array([ 0, 0, 0, 29]), ' ', array([ …	10110010	0.997085	0.398918	1	1
195	4	138305137	TCAxTGT	T	C	[('HT6W37', ': ', array([ 0, 33, 0, 0]), ' ', array([ 0., 1., 0., 0.]), ' ', array([ 0., 1., 0., 0.])), ('HT6W45', ': ', array([ 0, 25, 0, 0]), ' ', array([ 0., 1., 0., 0.]), ' ', array([ 0., 1., 0., 0.])), ('HT6W47', ': ', array([ 0, 47, 0, 0]), ' ', array([ 0., 1., 0., 0.]), ' ', array([ 0., 1., 0., 0.])), ('HT6W48', ': ', array([ 0, 49, 0, 0]), ' ', array([ 0., 1., 0., 0.]), ' ', array([ 0., 1…	100010	1	0.493902	1	1
196	4	138809211	GAGxAAA	A	G	[('HT6W37', ': ', array([33, 0, 0, 0]), ' ', array([ 1., 0., 0., 0.]), ' ', array([ 1., 0., 0., 0.])), ('HT6W45', ': ', array([32, 0, 0, 0]), ' ', array([ 1., 0., 0., 0.]), ' ', array([ 1., 0., 0., 0.])), ('HT6W47', ': ', array([43, 1, 0, 0]), ' ', array([ 0.97727273, 0.02272727, 0. , 0. ]), ' ', array([ 1., 0., 0., 0.])), ('HT6W48', ': ', array([43, 0, 0, 0]), ' ', array([ 1., 0., 0., 0.]), ' ',…	100010	0.989067	0.595238	1	1
197	4	147511498	GAAxAGT	G	T	[('HT6W37', ': ', array([ 0, 0, 1, 26]), ' ', array([ 0. , 0. , 0.03703704, 0.96296296]), ' ', array([ 0., 0., 0., 1.])), ('HT6W45', ': ', array([ 0, 0, 0, 27]), ' ', array([ 0., 0., 0., 1.]), ' ', array([ 0., 0., 0., 1.])), ('HT6W47', ': ', array([ 0, 1, 0, 35]), ' ', array([ 0. , 0.02777778, 0. , 0.97222222]), ' ', array([ 0., 0., 0., 1.])), ('HT6W48', ': ', array([ 0, 0, 0, 37]), ' ', array([ …	10110010	0.990741	0.424904	1	1
198	4	147512763	GGAxACC	G	A	[('HT6W37', ': ', array([ 0, 0, 0, 32]), ' ', array([ 0., 0., 0., 1.]), ' ', array([ 0., 0., 0., 1.])), ('HT6W45', ': ', array([ 0, 0, 0, 41]), ' ', array([ 0., 0., 0., 1.]), ' ', array([ 0., 0., 0., 1.])), ('HT6W47', ': ', array([ 0, 0, 0, 36]), ' ', array([ 0., 0., 0., 1.]), ' ', array([ 0., 0., 0., 1.])), ('HT6W48', ': ', array([ 0, 0, 0, 30]), ' ', array([ 0., 0., 0., 1.]), ' ', array([ 0., 0…	10110010	0.991342	0.496426	1	1
199	4	155712979	ATAxATC	A	C	[('HT6W37', ': ', array([30, 0, 0, 0]), ' ', array([ 1., 0., 0., 0.]), ' ', array([ 1., 0., 0., 0.])), ('HT6W45', ': ', array([29, 0, 0, 0]), ' ', array([ 1., 0., 0., 0.]), ' ', array([ 1., 0., 0., 0.])), ('HT6W47', ': ', array([52, 0, 0, 0]), ' ', array([ 1., 0., 0., 0.]), ' ', array([ 1., 0., 0., 0.])), ('HT6W48', ': ', array([32, 1, 0, 0]), ' ', array([ 0.96969697, 0.03030303, 0. , 0. ]), ' ',…	100010	0.99363	0.447046	1	1
200	4	159203715	GAAxATT	G	T	[('HT6W37', ': ', array([ 0, 0, 0, 39]), ' ', array([ 0., 0., 0., 1.]), ' ', array([ 0., 0., 0., 1.])), ('HT6W45', ': ', array([ 0, 0, 0, 15]), ' ', array([ 0., 0., 0., 1.]), ' ', array([ 0., 0., 0., 1.])), ('HT6W47', ': ', array([ 0, 0, 0, 10]), ' ', array([ 0., 0., 0., 1.]), ' ', array([ 0., 0., 0., 1.])), ('HT6W48', ': ', array([ 0, 0, 0, 19]), ' ', array([ 0., 0., 0., 1.]), ' ', array([ 0., 0…	10110010	0.992857	1	1	1
201	4	167005355	CTAxTCA	T	A	[('HT6W37', ': ', array([ 0, 32, 0, 0]), ' ', array([ 0., 1., 0., 0.]), ' ', array([ 0., 1., 0., 0.])), ('HT6W45', ': ', array([ 0, 18, 0, 0]), ' ', array([ 0., 1., 0., 0.]), ' ', array([ 0., 1., 0., 0.])), ('HT6W47', ': ', array([ 0, 20, 0, 0]), ' ', array([ 0., 1., 0., 0.]), ' ', array([ 0., 1., 0., 0.])), ('HT6W48', ': ', array([ 0, 18, 0, 0]), ' ', array([ 0., 1., 0., 0.]), ' ', array([ 0., 1…	10110010	1	1	1	1
202	4	188939734	AAAxCAA	G	T	[('HT6W37', ': ', array([ 1, 0, 0, 35]), ' ', array([ 0.02777778, 0. , 0. , 0.97222222]), ' ', array([ 0., 0., 0., 1.])), ('HT6W45', ': ', array([ 0, 0, 0, 14]), ' ', array([ 0., 0., 0., 1.]), ' ', array([ 0., 0., 0., 1.])), ('HT6W47', ': ', array([ 0, 0, 0, 16]), ' ', array([ 0., 0., 0., 1.]), ' ', array([ 0., 0., 0., 1.])), ('HT6W48', ': ', array([ 0, 0, 0, 25]), ' ', array([ 0., 0., 0., 1.]), …	10110010	0.996032	0.990741	1	1
203	5	779064	AAGxGCT	G	T	[('HT6W37', ': ', array([ 0, 0, 0, 192]), ' ', array([ 0., 0., 0., 1.]), ' ', array([ 0., 0., 0., 1.])), ('HT6W45', ': ', array([ 0, 0, 0, 154]), ' ', array([ 0., 0., 0., 1.]), ' ', array([ 0., 0., 0., 1.])), ('HT6W47', ': ', array([ 0, 1, 0, 200]), ' ', array([ 0. , 0.00497512, 0. , 0.99502488]), ' ', array([ 0., 0., 0., 1.])), ('HT6W48', ': ', array([ 0, 0, 0, 190]), ' ', array([ 0., 0., 0., 1.…	10110010	0.997282	0.0936768	1	1
204	5	1235963	GATxTTC	A	C	[('HT6W37', ': ', array([100, 0, 0, 0]), ' ', array([ 1., 0., 0., 0.]), ' ', array([ 1., 0., 0., 0.])), ('HT6W45', ': ', array([111, 0, 0, 0]), ' ', array([ 1., 0., 0., 0.]), ' ', array([ 1., 0., 0., 0.])), ('HT6W47', ': ', array([108, 0, 1, 0]), ' ', array([ 0.99082569, 0. , 0.00917431, 0. ]), ' ', array([ 1., 0., 0., 0.])), ('HT6W48', ': ', array([141, 1, 0, 0]), ' ', array([ 0.99295775, 0.0070…	10110010	0.99655	0.214741	1	1
205	5	1710211	TCCxACC	C	T	[('HT6W37', ': ', array([ 0, 0, 87, 0]), ' ', array([ 0., 0., 1., 0.]), ' ', array([ 0., 0., 1., 0.])), ('HT6W45', ': ', array([ 0, 0, 99, 0]), ' ', array([ 0., 0., 1., 0.]), ' ', array([ 0., 0., 1., 0.])), ('HT6W47', ': ', array([ 0, 0, 104, 0]), ' ', array([ 0., 0., 1., 0.]), ' ', array([ 0., 0., 1., 0.])), ('HT6W48', ': ', array([ 0, 0, 108, 0]), ' ', array([ 0., 0., 1., 0.]), ' ', array([ 0.,…	100010	0.997777	0.245713	1	1
206	5	2264224	GAGxTCT	C	T	[('HT6W37', ': ', array([ 0, 0, 82, 0]), ' ', array([ 0., 0., 1., 0.]), ' ', array([ 0., 0., 1., 0.])), ('HT6W45', ': ', array([ 0, 0, 80, 0]), ' ', array([ 0., 0., 1., 0.]), ' ', array([ 0., 0., 1., 0.])), ('HT6W47', ': ', array([ 0, 0, 96, 1]), ' ', array([ 0. , 0. , 0.98969072, 0.01030928]), ' ', array([ 0., 0., 1., 0.])), ('HT6W48', ': ', array([ 0, 0, 87, 0]), ' ', array([ 0., 0., 1., 0.]), …	10110010	0.987365	0.18501	0.999999	1
207	5	2586820	AGTxAAT	G	A	[('HT6W37', ': ', array([ 0, 1, 0, 89]), ' ', array([ 0. , 0.01111111, 0. , 0.98888889]), ' ', array([ 0., 0., 0., 1.])), ('HT6W45', ': ', array([ 0, 0, 0, 81]), ' ', array([ 0., 0., 0., 1.]), ' ', array([ 0., 0., 0., 1.])), ('HT6W47', ': ', array([ 0, 0, 0, 103]), ' ', array([ 0., 0., 0., 1.]), ' ', array([ 0., 0., 0., 1.])), ('HT6W48', ': ', array([ 0, 0, 0, 129]), ' ', array([ 0., 0., 0., 1.])…	10110010	0.99709	0.201116	1	1
208	5	2768734	TACxACT	A	G	[('HT6W37', ': ', array([96, 1, 0, 0]), ' ', array([ 0.98969072, 0.01030928, 0. , 0. ]), ' ', array([ 1., 0., 0., 0.])), ('HT6W45', ': ', array([97, 0, 0, 0]), ' ', array([ 1., 0., 0., 0.]), ' ', array([ 1., 0., 0., 0.])), ('HT6W47', ': ', array([96, 0, 0, 0]), ' ', array([ 1., 0., 0., 0.]), ' ', array([ 1., 0., 0., 0.])), ('HT6W48', ': ', array([123, 0, 1, 0]), ' ', array([ 0.984, 0. , 0.008, 0.…	100010	0.991732	0.22155	1	1
209	5	3495052	AATxATT	T	G	[('HT6W37', ': ', array([ 0, 86, 0, 0]), ' ', array([ 0., 1., 0., 0.]), ' ', array([ 0., 1., 0., 0.])), ('HT6W45', ': ', array([ 1, 86, 1, 0]), ' ', array([ 0.01136364, 0.97727273, 0.01136364, 0. ]), ' ', array([ 0., 1., 0., 0.])), ('HT6W47', ': ', array([ 0, 108, 0, 0]), ' ', array([ 0., 1., 0., 0.]), ' ', array([ 0., 1., 0., 0.])), ('HT6W48', ': ', array([ 0, 98, 0, 1]), ' ', array([ 0. , 0.989…	10110010	0.996516	0.195804	1	1
210	5	4453814	AATxGAC	T	A	[('HT6W37', ': ', array([ 0, 79, 0, 1]), ' ', array([ 0. , 0.9875, 0. , 0.0125]), ' ', array([ 0., 1., 0., 0.])), ('HT6W45', ': ', array([ 1, 93, 0, 0]), ' ', array([ 0.0106383, 0.9893617, 0. , 0. ]), ' ', array([ 0., 1., 0., 0.])), ('HT6W47', ': ', array([ 0, 118, 0, 0]), ' ', array([ 0., 1., 0., 0.]), ' ', array([ 0., 1., 0., 0.])), ('HT6W48', ': ', array([ 0, 104, 0, 0]), ' ', array([ 0., 1., …	100010	0.994504	0.211939	1	1
211	5	5040628	GGTxAGG	C	T	[('HT6W37', ': ', array([ 0, 0, 72, 0]), ' ', array([ 0., 0., 1., 0.]), ' ', array([ 0., 0., 1., 0.])), ('HT6W45', ': ', array([ 0, 0, 84, 0]), ' ', array([ 0., 0., 1., 0.]), ' ', array([ 0., 0., 1., 0.])), ('HT6W47', ': ', array([ 1, 0, 96, 1]), ' ', array([ 0.01020408, 0. , 0.97959184, 0.01020408]), ' ', array([ 0., 0., 1., 0.])), ('HT6W48', ': ', array([ 0, 0, 104, 0]), ' ', array([ 0., 0., 1.…	10110010	0.993679	0.149233	0.999999	1
212	5	5154478	AATxTCT	T	G	[('HT6W37', ': ', array([ 0, 84, 0, 1]), ' ', array([ 0. , 0.98823529, 0. , 0.01176471]), ' ', array([ 0., 1., 0., 0.])), ('HT6W45', ': ', array([ 0, 96, 0, 0]), ' ', array([ 0., 1., 0., 0.]), ' ', array([ 0., 1., 0., 0.])), ('HT6W47', ': ', array([ 0, 111, 0, 0]), ' ', array([ 0., 1., 0., 0.]), ' ', array([ 0., 1., 0., 0.])), ('HT6W48', ': ', array([ 0, 89, 1, 1]), ' ', array([ 0. , 0.97802198, …	100010	0.98924	0.198313	1	1
213	5	6597543	TGTxTTT	C	A	[('HT6W37', ': ', array([ 0, 0, 89, 0]), ' ', array([ 0., 0., 1., 0.]), ' ', array([ 0., 0., 1., 0.])), ('HT6W45', ': ', array([ 0, 0, 82, 0]), ' ', array([ 0., 0., 1., 0.]), ' ', array([ 0., 0., 1., 0.])), ('HT6W47', ': ', array([ 0, 1, 89, 0]), ' ', array([ 0. , 0.01111111, 0.98888889, 0. ]), ' ', array([ 0., 0., 1., 0.])), ('HT6W48', ': ', array([ 0, 0, 97, 1]), ' ', array([ 0. , 0. , 0.989795…	100010	0.993945	0.202804	1	1
214	5	8274027	ACTxAAA	C	A	[('HT6W37', ': ', array([ 0, 0, 103, 0]), ' ', array([ 0., 0., 1., 0.]), ' ', array([ 0., 0., 1., 0.])), ('HT6W45', ': ', array([ 2, 0, 97, 0]), ' ', array([ 0.02020202, 0. , 0.97979798, 0. ]), ' ', array([ 0., 0., 1., 0.])), ('HT6W47', ': ', array([ 0, 0, 88, 0]), ' ', array([ 0., 0., 1., 0.]), ' ', array([ 0., 0., 1., 0.])), ('HT6W48', ': ', array([ 1, 0, 104, 0]), ' ', array([ 0.00952381, 0. ,…	10110010	0.994178	0.187182	1	1
215	5	8358522	TGGxCCC	A	G	[('HT6W37', ': ', array([115, 0, 1, 0]), ' ', array([ 0.99137931, 0. , 0.00862069, 0. ]), ' ', array([ 1., 0., 0., 0.])), ('HT6W45', ': ', array([87, 0, 0, 0]), ' ', array([ 1., 0., 0., 0.]), ' ', array([ 1., 0., 0., 0.])), ('HT6W47', ': ', array([115, 0, 0, 0]), ' ', array([ 1., 0., 0., 0.]), ' ', array([ 1., 0., 0., 0.])), ('HT6W48', ': ', array([126, 0, 0, 0]), ' ', array([ 1., 0., 0., 0.]), '…	10110010	0.99767	0.17139	1	1
216	5	9864248	CTTxCCT	T	C	[('HT6W37', ': ', array([ 1, 89, 0, 1]), ' ', array([ 0.01098901, 0.97802198, 0. , 0.01098901]), ' ', array([ 0., 1., 0., 0.])), ('HT6W45', ': ', array([ 1, 100, 0, 1]), ' ', array([ 0.00980392, 0.98039216, 0. , 0.00980392]), ' ', array([ 0., 1., 0., 0.])), ('HT6W47', ': ', array([ 0, 103, 0, 1]), ' ', array([ 0. , 0.99038462, 0. , 0.00961538]), ' ', array([ 0., 1., 0., 0.])), ('HT6W48', ': ', ar…	10110010	0.989701	0.172051	1	1
217	5	11273804	TTTxGCA	T	C	[('HT6W37', ': ', array([ 0, 72, 0, 0]), ' ', array([ 0., 1., 0., 0.]), ' ', array([ 0., 1., 0., 0.])), ('HT6W45', ': ', array([ 0, 77, 0, 1]), ' ', array([ 0. , 0.98717949, 0. , 0.01282051]), ' ', array([ 0., 1., 0., 0.])), ('HT6W47', ': ', array([ 0, 101, 0, 1]), ' ', array([ 0. , 0.99019608, 0. , 0.00980392]), ' ', array([ 0., 1., 0., 0.])), ('HT6W48', ': ', array([ 0, 103, 0, 0]), ' ', array(…	10110010	0.995904	0.192235	1	1
218	5	18872371	TATxTAT	T	G	[('HT6W37', ': ', array([ 0, 69, 0, 1]), ' ', array([ 0. , 0.98571429, 0. , 0.01428571]), ' ', array([ 0., 1., 0., 0.])), ('HT6W45', ': ', array([ 0, 67, 0, 1]), ' ', array([ 0. , 0.98529412, 0. , 0.01470588]), ' ', array([ 0., 1., 0., 0.])), ('HT6W47', ': ', array([ 0, 96, 0, 1]), ' ', array([ 0. , 0.98969072, 0. , 0.01030928]), ' ', array([ 0., 1., 0., 0.])), ('HT6W48', ': ', array([ 0, 76, 0, …	10110010	0.989226	0.261496	1	1
219	5	19399144	AATxTTA	C	T	[('HT6W37', ': ', array([ 0, 1, 72, 0]), ' ', array([ 0. , 0.01369863, 0.98630137, 0. ]), ' ', array([ 0., 0., 1., 0.])), ('HT6W45', ': ', array([ 1, 0, 72, 0]), ' ', array([ 0.01369863, 0. , 0.98630137, 0. ]), ' ', array([ 0., 0., 1., 0.])), ('HT6W47', ': ', array([ 0, 0, 92, 0]), ' ', array([ 0., 0., 1., 0.]), ' ', array([ 0., 0., 1., 0.])), ('HT6W48', ': ', array([ 0, 0, 92, 0]), ' ', array([ …	10110010	0.998043	0.281927	1	1
220	5	20732328	AAAxAAC	G	T	[('HT6W37', ': ', array([ 0, 0, 0, 71]), ' ', array([ 0., 0., 0., 1.]), ' ', array([ 0., 0., 0., 1.])), ('HT6W45', ': ', array([ 0, 0, 0, 67]), ' ', array([ 0., 0., 0., 1.]), ' ', array([ 0., 0., 0., 1.])), ('HT6W47', ': ', array([ 0, 0, 0, 64]), ' ', array([ 0., 0., 0., 1.]), ' ', array([ 0., 0., 0., 1.])), ('HT6W48', ': ', array([ 1, 0, 0, 86]), ' ', array([ 0.01149425, 0. , 0. , 0.98850575]), …	100010	0.991718	0.207638	1	1
221	5	21228741	AGAxAAC	G	T	[('HT6W37', ': ', array([ 0, 0, 0, 62]), ' ', array([ 0., 0., 0., 1.]), ' ', array([ 0., 0., 0., 1.])), ('HT6W45', ': ', array([ 0, 0, 0, 63]), ' ', array([ 0., 0., 0., 1.]), ' ', array([ 0., 0., 0., 1.])), ('HT6W47', ': ', array([ 0, 1, 0, 79]), ' ', array([ 0. , 0.0125, 0. , 0.9875]), ' ', array([ 0., 0., 0., 1.])), ('HT6W48', ': ', array([ 1, 1, 0, 76]), ' ', array([ 0.01282051, 0.01282051, 0.…	10110010	0.990317	0.220649	1	1
222	5	21818647	CCCxAGA	C	A	[('HT6W37', ': ', array([ 0, 0, 90, 0]), ' ', array([ 0., 0., 1., 0.]), ' ', array([ 0., 0., 1., 0.])), ('HT6W45', ': ', array([ 0, 0, 72, 0]), ' ', array([ 0., 0., 1., 0.]), ' ', array([ 0., 0., 1., 0.])), ('HT6W47', ': ', array([ 0, 0, 89, 0]), ' ', array([ 0., 0., 1., 0.]), ' ', array([ 0., 0., 1., 0.])), ('HT6W48', ': ', array([ 0, 1, 80, 1]), ' ', array([ 0. , 0.01219512, 0.97560976, 0.01219…	100010	0.991415	0.267824	1	1
223	5	21850005	AAAxCAA	A	G	[('HT6W37', ': ', array([66, 0, 0, 0]), ' ', array([ 1., 0., 0., 0.]), ' ', array([ 1., 0., 0., 0.])), ('HT6W45', ': ', array([65, 1, 0, 0]), ' ', array([ 0.98484848, 0.01515152, 0. , 0. ]), ' ', array([ 1., 0., 0., 0.])), ('HT6W47', ': ', array([90, 0, 0, 0]), ' ', array([ 1., 0., 0., 0.]), ' ', array([ 1., 0., 0., 0.])), ('HT6W48', ': ', array([83, 0, 0, 0]), ' ', array([ 1., 0., 0., 0.]), ' ',…	100010	0.998264	0.217105	1	1
224	5	22420128	TTTxGGT	T	C	[('HT6W37', ': ', array([ 0, 63, 0, 0]), ' ', array([ 0., 1., 0., 0.]), ' ', array([ 0., 1., 0., 0.])), ('HT6W45', ': ', array([ 0, 69, 0, 0]), ' ', array([ 0., 1., 0., 0.]), ' ', array([ 0., 1., 0., 0.])), ('HT6W47', ': ', array([ 0, 75, 0, 0]), ' ', array([ 0., 1., 0., 0.]), ' ', array([ 0., 1., 0., 0.])), ('HT6W48', ': ', array([ 0, 76, 0, 0]), ' ', array([ 0., 1., 0., 0.]), ' ', array([ 0., 1…	100010	0.997074	0.2913	1	1
225	5	22624551	AAAxAAC	G	T	[('HT6W37', ': ', array([ 0, 1, 0, 72]), ' ', array([ 0. , 0.01369863, 0. , 0.98630137]), ' ', array([ 0., 0., 0., 1.])), ('HT6W45', ': ', array([ 0, 1, 0, 79]), ' ', array([ 0. , 0.0125, 0. , 0.9875]), ' ', array([ 0., 0., 0., 1.])), ('HT6W47', ': ', array([ 0, 0, 0, 81]), ' ', array([ 0., 0., 0., 1.]), ' ', array([ 0., 0., 0., 1.])), ('HT6W48', ': ', array([ 0, 0, 0, 75]), ' ', array([ 0. , 0. …	100010	0.994919	0.243718	1	1
226	5	23171907	GAAxAAA	G	T	[('HT6W37', ': ', array([ 0, 0, 0, 66]), ' ', array([ 0., 0., 0., 1.]), ' ', array([ 0., 0., 0., 1.])), ('HT6W45', ': ', array([ 0, 0, 0, 57]), ' ', array([ 0., 0., 0., 1.]), ' ', array([ 0., 0., 0., 1.])), ('HT6W47', ': ', array([ 1, 0, 0, 81]), ' ', array([ 0.01219512, 0. , 0. , 0.98780488]), ' ', array([ 0., 0., 0., 1.])), ('HT6W48', ': ', array([ 0, 0, 0, 91]), ' ', array([ 0., 0., 0., 1.]), …	10110010	0.998258	0.271647	1	1
227	5	23759927	AGAxACA	G	T	[('HT6W37', ': ', array([ 0, 0, 0, 78]), ' ', array([ 0., 0., 0., 1.]), ' ', array([ 0., 0., 0., 1.])), ('HT6W45', ': ', array([ 0, 0, 0, 69]), ' ', array([ 0., 0., 0., 1.]), ' ', array([ 0., 0., 0., 1.])), ('HT6W47', ': ', array([ 0, 0, 1, 71]), ' ', array([ 0. , 0. , 0.01388889, 0.98611111]), ' ', array([ 0., 0., 0., 1.])), ('HT6W48', ': ', array([ 0, 0, 0, 74]), ' ', array([ 0., 0., 0., 1.]), …	10110010	0.994032	0.242131	1	1
228	5	26416254	GTGxCTG	G	A	[('HT6W37', ': ', array([ 0, 0, 0, 74]), ' ', array([ 0., 0., 0., 1.]), ' ', array([ 0., 0., 0., 1.])), ('HT6W45', ': ', array([ 0, 0, 0, 60]), ' ', array([ 0., 0., 0., 1.]), ' ', array([ 0., 0., 0., 1.])), ('HT6W47', ': ', array([ 0, 0, 0, 91]), ' ', array([ 0., 0., 0., 1.]), ' ', array([ 0., 0., 0., 1.])), ('HT6W48', ': ', array([ 0, 0, 0, 79]), ' ', array([ 0., 0., 0., 1.]), ' ', array([ 0., 0…	10110010	1	0.230701	1	1
229	5	26577648	AATxTTT	T	G	[('HT6W37', ': ', array([ 0, 64, 0, 0]), ' ', array([ 0., 1., 0., 0.]), ' ', array([ 0., 1., 0., 0.])), ('HT6W45', ': ', array([ 0, 78, 0, 0]), ' ', array([ 0., 1., 0., 0.]), ' ', array([ 0., 1., 0., 0.])), ('HT6W47', ': ', array([ 0, 99, 0, 0]), ' ', array([ 0., 1., 0., 0.]), ' ', array([ 0., 1., 0., 0.])), ('HT6W48', ': ', array([ 0, 95, 0, 1]), ' ', array([ 0. , 0.98958333, 0. , 0.01041667]), …	100010	0.994385	0.205882	1	1
230	5	26675981	CTAxATT	A	C	[('HT6W37', ': ', array([96, 0, 1, 0]), ' ', array([ 0.98969072, 0. , 0.01030928, 0. ]), ' ', array([ 1., 0., 0., 0.])), ('HT6W45', ': ', array([73, 0, 0, 0]), ' ', array([ 1., 0., 0., 0.]), ' ', array([ 1., 0., 0., 0.])), ('HT6W47', ': ', array([92, 0, 0, 1]), ' ', array([ 0.98924731, 0. , 0. , 0.01075269]), ' ', array([ 1., 0., 0., 0.])), ('HT6W48', ': ', array([78, 0, 0, 0]), ' ', array([ 1., …	10110010	0.993582	0.259419	1	1
231	5	27664429	TTAxATA	G	T	[('HT6W37', ': ', array([ 0, 0, 0, 61]), ' ', array([ 0., 0., 0., 1.]), ' ', array([ 0., 0., 0., 1.])), ('HT6W45', ': ', array([ 0, 1, 0, 65]), ' ', array([ 0. , 0.01515152, 0. , 0.98484848]), ' ', array([ 0., 0., 0., 1.])), ('HT6W47', ': ', array([ 0, 0, 0, 88]), ' ', array([ 0., 0., 0., 1.]), ' ', array([ 0., 0., 0., 1.])), ('HT6W48', ': ', array([ 1, 2, 1, 79]), ' ', array([ 0.01204819, 0.0240…	10110010	0.98858	0.220668	0.999999	1
232	5	28275990	ATTxACT	A	C	[('HT6W37', ': ', array([81, 0, 2, 0]), ' ', array([ 0.97590361, 0. , 0.02409639, 0. ]), ' ', array([ 1., 0., 0., 0.])), ('HT6W45', ': ', array([67, 0, 0, 1]), ' ', array([ 0.98529412, 0. , 0. , 0.01470588]), ' ', array([ 1., 0., 0., 0.])), ('HT6W47', ': ', array([90, 0, 0, 0]), ' ', array([ 0.98901099, 0. , 0. , 0. ]), ' ', array([ 1., 0., 0., 0.])), ('HT6W48', ': ', array([88, 0, 0, 0]), ' ', a…	10110010	0.993235	0.250857	1	1
233	5	28908889	AAAxGAA	A	C	[('HT6W37', ': ', array([68, 0, 1, 0]), ' ', array([ 0.98550725, 0. , 0.01449275, 0. ]), ' ', array([ 1., 0., 0., 0.])), ('HT6W45', ': ', array([60, 0, 1, 0]), ' ', array([ 0.98360656, 0. , 0.01639344, 0. ]), ' ', array([ 1., 0., 0., 0.])), ('HT6W47', ': ', array([81, 0, 0, 0]), ' ', array([ 1., 0., 0., 0.]), ' ', array([ 1., 0., 0., 0.])), ('HT6W48', ': ', array([97, 0, 0, 0]), ' ', array([ 1., …	10110010	0.994485	0.283915	1	1
234	5	29114026	ATAxTTT	A	C	[('HT6W37', ': ', array([72, 0, 0, 0]), ' ', array([ 1., 0., 0., 0.]), ' ', array([ 1., 0., 0., 0.])), ('HT6W45', ': ', array([80, 0, 1, 0]), ' ', array([ 0.98765432, 0. , 0.01234568, 0. ]), ' ', array([ 1., 0., 0., 0.])), ('HT6W47', ': ', array([75, 0, 1, 0]), ' ', array([ 0.98684211, 0. , 0.01315789, 0. ]), ' ', array([ 1., 0., 0., 0.])), ('HT6W48', ': ', array([69, 0, 0, 0]), ' ', array([ 1., …	100010	0.988318	0.233905	0.999999	1
235	5	29150008	GAGxTAA	G	C	[('HT6W37', ': ', array([ 0, 0, 0, 73]), ' ', array([ 0., 0., 0., 1.]), ' ', array([ 0., 0., 0., 1.])), ('HT6W45', ': ', array([ 0, 0, 0, 58]), ' ', array([ 0., 0., 0., 1.]), ' ', array([ 0., 0., 0., 1.])), ('HT6W47', ': ', array([ 0, 1, 0, 100]), ' ', array([ 0. , 0.00990099, 0. , 0.99009901]), ' ', array([ 0., 0., 0., 1.])), ('HT6W48', ': ', array([ 0, 0, 0, 101]), ' ', array([ 0., 0., 0., 1.])…	100010	0.996096	0.270043	1	1
236	5	29269237	CCAxTTA	C	A	[('HT6W37', ': ', array([ 0, 0, 68, 0]), ' ', array([ 0., 0., 1., 0.]), ' ', array([ 0., 0., 1., 0.])), ('HT6W45', ': ', array([ 0, 0, 64, 0]), ' ', array([ 0., 0., 1., 0.]), ' ', array([ 0., 0., 1., 0.])), ('HT6W47', ': ', array([ 0, 0, 82, 0]), ' ', array([ 0., 0., 1., 0.]), ' ', array([ 0., 0., 1., 0.])), ('HT6W48', ': ', array([ 0, 0, 72, 0]), ' ', array([ 0., 0., 1., 0.]), ' ', array([ 0., 0…	10110010	0.996822	0.2475	1	1
237	5	33242519	GCAxTAA	C	A	[('HT6W37', ': ', array([ 1, 0, 59, 0]), ' ', array([ 0.01666667, 0. , 0.98333333, 0. ]), ' ', array([ 0., 0., 1., 0.])), ('HT6W45', ': ', array([ 0, 1, 79, 0]), ' ', array([ 0. , 0.0125, 0.9875, 0. ]), ' ', array([ 0., 0., 1., 0.])), ('HT6W47', ': ', array([ 0, 0, 71, 0]), ' ', array([ 0., 0., 1., 0.]), ' ', array([ 0., 0., 1., 0.])), ('HT6W48', ': ', array([ 0, 0, 79, 1]), ' ', array([ 0. , 0. …	10110010	0.987573	0.229036	1	1
238	5	35023010	AACxAGA	T	C	[('HT6W37', ': ', array([ 0, 72, 0, 0]), ' ', array([ 0., 1., 0., 0.]), ' ', array([ 0., 1., 0., 0.])), ('HT6W45', ': ', array([ 1, 64, 0, 0]), ' ', array([ 0.01538462, 0.98461538, 0. , 0. ]), ' ', array([ 0., 1., 0., 0.])), ('HT6W47', ': ', array([ 0, 71, 1, 1]), ' ', array([ 0. , 0.97260274, 0.01369863, 0.01369863]), ' ', array([ 0., 1., 0., 0.])), ('HT6W48', ': ', array([ 0, 81, 0, 0]), ' ', a…	10110010	0.991822	0.293992	1	1
239	5	38081071	GTTxTGT	A	C	[('HT6W37', ': ', array([65, 0, 0, 0]), ' ', array([ 1., 0., 0., 0.]), ' ', array([ 1., 0., 0., 0.])), ('HT6W45', ': ', array([71, 0, 0, 0]), ' ', array([ 1., 0., 0., 0.]), ' ', array([ 1., 0., 0., 0.])), ('HT6W47', ': ', array([78, 0, 0, 0]), ' ', array([ 1., 0., 0., 0.]), ' ', array([ 1., 0., 0., 0.])), ('HT6W48', ': ', array([70, 0, 0, 1]), ' ', array([ 0.98591549, 0. , 0. , 0.01408451]), ' ',…	10110010	0.992808	0.221153	1	1
240	5	38731972	AATxTGG	T	G	[('HT6W37', ': ', array([ 0, 86, 0, 0]), ' ', array([ 0., 1., 0., 0.]), ' ', array([ 0., 1., 0., 0.])), ('HT6W45', ': ', array([ 0, 65, 0, 4]), ' ', array([ 0. , 0.94202899, 0. , 0.05797101]), ' ', array([ 0., 1., 0., 0.])), ('HT6W47', ': ', array([ 0, 81, 0, 0]), ' ', array([ 0., 1., 0., 0.]), ' ', array([ 0., 1., 0., 0.])), ('HT6W48', ': ', array([ 0, 77, 2, 1]), ' ', array([ 0. , 0.9625, 0.025…	100010	0.987736	0.204808	0.999348	1
241	5	41057730	CGGxTCA	T	C	[('HT6W37', ': ', array([ 0, 57, 0, 1]), ' ', array([ 0. , 0.98275862, 0. , 0.01724138]), ' ', array([ 0., 1., 0., 0.])), ('HT6W45', ': ', array([ 0, 66, 0, 0]), ' ', array([ 0., 1., 0., 0.]), ' ', array([ 0., 1., 0., 0.])), ('HT6W47', ': ', array([ 0, 49, 0, 0]), ' ', array([ 0., 1., 0., 0.]), ' ', array([ 0., 1., 0., 0.])), ('HT6W48', ': ', array([ 0, 44, 0, 0]), ' ', array([ 0., 1., 0., 0.]), …	100010	0.987347	0.311828	1	1
242	5	41514579	CCAxTCT	T	G	[('HT6W37', ': ', array([ 0, 77, 1, 0]), ' ', array([ 0. , 0.98717949, 0.01282051, 0. ]), ' ', array([ 0., 1., 0., 0.])), ('HT6W45', ': ', array([ 0, 68, 0, 0]), ' ', array([ 0., 1., 0., 0.]), ' ', array([ 0., 1., 0., 0.])), ('HT6W47', ': ', array([ 0, 70, 1, 1]), ' ', array([ 0. , 0.97222222, 0.01388889, 0.01388889]), ' ', array([ 0., 1., 0., 0.])), ('HT6W48', ': ', array([ 1, 93, 0, 0]), ' ', a…	100010	0.990747	0.214286	0.999999	1
243	5	41546919	AAAxAAA	A	C	[('HT6W37', ': ', array([71, 0, 0, 1]), ' ', array([ 0.98611111, 0. , 0. , 0.01388889]), ' ', array([ 1., 0., 0., 0.])), ('HT6W45', ': ', array([67, 0, 0, 0]), ' ', array([ 1., 0., 0., 0.]), ' ', array([ 1., 0., 0., 0.])), ('HT6W47', ': ', array([92, 0, 0, 0]), ' ', array([ 1., 0., 0., 0.]), ' ', array([ 1., 0., 0., 0.])), ('HT6W48', ': ', array([58, 0, 0, 0]), ' ', array([ 1., 0., 0., 0.]), ' ',…	100010	0.994011	0.221703	1	1
244	5	45086376	CCAxGTG	A	G	[('HT6W37', ': ', array([65, 0, 0, 1]), ' ', array([ 0.98484848, 0. , 0. , 0.01515152]), ' ', array([ 1., 0., 0., 0.])), ('HT6W45', ': ', array([84, 0, 1, 0]), ' ', array([ 0.98823529, 0. , 0.01176471, 0. ]), ' ', array([ 1., 0., 0., 0.])), ('HT6W47', ': ', array([94, 0, 1, 0]), ' ', array([ 0.98947368, 0. , 0.01052632, 0. ]), ' ', array([ 1., 0., 0., 0.])), ('HT6W48', ': ', array([70, 1, 2, 0]),…	10010000	0.933909	0.213748	0.999717	1
245	5	52521200	TGTxTTA	A	C	[('HT6W37', ': ', array([39, 1, 0, 0]), ' ', array([ 0.975, 0.025, 0. , 0. ]), ' ', array([ 1., 0., 0., 0.])), ('HT6W45', ': ', array([38, 0, 1, 0]), ' ', array([ 0.97435897, 0. , 0.02564103, 0. ]), ' ', array([ 1., 0., 0., 0.])), ('HT6W47', ': ', array([51, 0, 0, 0]), ' ', array([ 1., 0., 0., 0.]), ' ', array([ 1., 0., 0., 0.])), ('HT6W48', ': ', array([37, 0, 1, 0]), ' ', array([ 0.97368421, 0.…	10110010	0.984637	0.487121	1	1
246	5	52563305	GGAxAAT	G	A	[('HT6W37', ': ', array([ 0, 0, 0, 39]), ' ', array([ 0., 0., 0., 1.]), ' ', array([ 0., 0., 0., 1.])), ('HT6W45', ': ', array([ 0, 0, 1, 25]), ' ', array([ 0. , 0. , 0.03846154, 0.96153846]), ' ', array([ 0., 0., 0., 1.])), ('HT6W47', ': ', array([ 0, 0, 0, 50]), ' ', array([ 0., 0., 0., 1.]), ' ', array([ 0., 0., 0., 1.])), ('HT6W48', ': ', array([ 1, 0, 0, 42]), ' ', array([ 0.02325581, 0. , 0…	10110010	0.989229	0.494987	1	1
247	5	54174302	GAGxAGC	A	C	[('HT6W37', ': ', array([31, 0, 0, 0]), ' ', array([ 1., 0., 0., 0.]), ' ', array([ 1., 0., 0., 0.])), ('HT6W45', ': ', array([37, 0, 0, 0]), ' ', array([ 1., 0., 0., 0.]), ' ', array([ 1., 0., 0., 0.])), ('HT6W47', ': ', array([45, 0, 0, 0]), ' ', array([ 1., 0., 0., 0.]), ' ', array([ 1., 0., 0., 0.])), ('HT6W48', ': ', array([37, 0, 0, 0]), ' ', array([ 1., 0., 0., 0.]), ' ', array([ 1., 0., 0…	10110010	0.996429	0.460745	1	1
248	5	58767632	CATxTTT	T	G	[('HT6W37', ': ', array([ 0, 38, 0, 0]), ' ', array([ 0., 1., 0., 0.]), ' ', array([ 0., 1., 0., 0.])), ('HT6W45', ': ', array([ 0, 35, 1, 0]), ' ', array([ 0. , 0.97222222, 0.02777778, 0. ]), ' ', array([ 0., 1., 0., 0.])), ('HT6W47', ': ', array([ 0, 53, 0, 0]), ' ', array([ 0., 1., 0., 0.]), ' ', array([ 0., 1., 0., 0.])), ('HT6W48', ': ', array([ 0, 46, 0, 0]), ' ', array([ 0., 1., 0., 0.]), …	100010	0.996416	0.428986	1	1
249	5	59052116	AGAxTTT	A	C	[('HT6W37', ': ', array([49, 0, 0, 0]), ' ', array([ 1., 0., 0., 0.]), ' ', array([ 1., 0., 0., 0.])), ('HT6W45', ': ', array([46, 0, 0, 0]), ' ', array([ 1., 0., 0., 0.]), ' ', array([ 1., 0., 0., 0.])), ('HT6W47', ': ', array([55, 0, 0, 0]), ' ', array([ 1., 0., 0., 0.]), ' ', array([ 1., 0., 0., 0.])), ('HT6W48', ': ', array([43, 0, 0, 0]), ' ', array([ 1., 0., 0., 0.]), ' ', array([ 1., 0., 0…	100010	0.995115	0.514706	1	1
250	5	86474744	AATxCAG	T	G	[('HT6W37', ': ', array([ 0, 26, 0, 0]), ' ', array([ 0., 1., 0., 0.]), ' ', array([ 0., 1., 0., 0.])), ('HT6W45', ': ', array([ 0, 43, 0, 1]), ' ', array([ 0. , 0.97727273, 0. , 0.02272727]), ' ', array([ 0., 1., 0., 0.])), ('HT6W47', ': ', array([ 0, 54, 1, 1]), ' ', array([ 0. , 0.96428571, 0.01785714, 0.01785714]), ' ', array([ 0., 1., 0., 0.])), ('HT6W48', ': ', array([ 0, 52, 0, 0]), ' ', a…	100010	0.990678	0.466931	1	1
251	5	90198963	CCAxCTT	A	G	[('HT6W37', ': ', array([35, 0, 0, 0]), ' ', array([ 1., 0., 0., 0.]), ' ', array([ 1., 0., 0., 0.])), ('HT6W45', ': ', array([33, 0, 1, 1]), ' ', array([ 0.94285714, 0. , 0.02857143, 0.02857143]), ' ', array([ 1., 0., 0., 0.])), ('HT6W47', ': ', array([48, 0, 0, 0]), ' ', array([ 1., 0., 0., 0.]), ' ', array([ 1., 0., 0., 0.])), ('HT6W48', ': ', array([47, 0, 1, 0]), ' ', array([ 0.97916667, 0. …	100010	0.988729	0.475801	1	1
252	5	94233688	GTTxTTG	A	G	[('HT6W37', ': ', array([43, 0, 0, 0]), ' ', array([ 1., 0., 0., 0.]), ' ', array([ 1., 0., 0., 0.])), ('HT6W45', ': ', array([35, 0, 0, 0]), ' ', array([ 1., 0., 0., 0.]), ' ', array([ 1., 0., 0., 0.])), ('HT6W47', ': ', array([43, 0, 0, 0]), ' ', array([ 1., 0., 0., 0.]), ' ', array([ 1., 0., 0., 0.])), ('HT6W48', ': ', array([40, 0, 0, 0]), ' ', array([ 1., 0., 0., 0.]), ' ', array([ 1., 0., 0…	10110010	0.992994	0.39952	1	1
253	5	102182074	CATxCCT	C	G	[('HT6W37', ': ', array([ 0, 0, 20, 0]), ' ', array([ 0., 0., 1., 0.]), ' ', array([ 0., 0., 1., 0.])), ('HT6W45', ': ', array([ 0, 0, 48, 0]), ' ', array([ 0., 0., 1., 0.]), ' ', array([ 0., 0., 1., 0.])), ('HT6W47', ': ', array([ 0, 0, 48, 1]), ' ', array([ 0. , 0. , 0.97959184, 0.02040816]), ' ', array([ 0., 0., 1., 0.])), ('HT6W48', ': ', array([ 0, 0, 37, 0]), ' ', array([ 0., 0., 1., 0.]), …	10110010	0.994663	0.562636	1	1
254	5	103103210	TACxTCT	C	A	[('HT6W37', ': ', array([ 0, 0, 30, 0]), ' ', array([ 0., 0., 1., 0.]), ' ', array([ 0., 0., 1., 0.])), ('HT6W45', ': ', array([ 1, 0, 37, 0]), ' ', array([ 0.02631579, 0. , 0.97368421, 0. ]), ' ', array([ 0., 0., 1., 0.])), ('HT6W47', ': ', array([ 0, 1, 37, 0]), ' ', array([ 0. , 0.02631579, 0.97368421, 0. ]), ' ', array([ 0., 0., 1., 0.])), ('HT6W48', ': ', array([ 0, 0, 49, 0]), ' ', array([ …	100010	0.994492	0.594318	1	1
255	5	103211338	TTTxTCT	C	A	[('HT6W37', ': ', array([ 0, 0, 34, 0]), ' ', array([ 0., 0., 1., 0.]), ' ', array([ 0., 0., 1., 0.])), ('HT6W45', ': ', array([ 0, 0, 26, 0]), ' ', array([ 0., 0., 1., 0.]), ' ', array([ 0., 0., 1., 0.])), ('HT6W47', ': ', array([ 0, 0, 38, 0]), ' ', array([ 0., 0., 1., 0.]), ' ', array([ 0., 0., 1., 0.])), ('HT6W48', ': ', array([ 0, 0, 30, 0]), ' ', array([ 0., 0., 1., 0.]), ' ', array([ 0., 0…	100010	0.991975	0.381177	1	1
256	5	105074262	AAAxTAC	G	C	[('HT6W37', ': ', array([ 0, 0, 0, 36]), ' ', array([ 0., 0., 0., 1.]), ' ', array([ 0., 0., 0., 1.])), ('HT6W45', ': ', array([ 0, 0, 0, 41]), ' ', array([ 0., 0., 0., 1.]), ' ', array([ 0., 0., 0., 1.])), ('HT6W47', ': ', array([ 0, 1, 0, 49]), ' ', array([ 0. , 0.02, 0. , 0.98]), ' ', array([ 0., 0., 0., 1.])), ('HT6W48', ': ', array([ 0, 0, 0, 47]), ' ', array([ 0., 0., 0., 1.]), ' ', array([…	10110010	0.993383	0.457368	1	1
257	5	106687093	AGAxACT	G	T	[('HT6W37', ': ', array([ 0, 0, 0, 60]), ' ', array([ 0., 0., 0., 1.]), ' ', array([ 0., 0., 0., 1.])), ('HT6W45', ': ', array([ 0, 0, 0, 31]), ' ', array([ 0., 0., 0., 1.]), ' ', array([ 0., 0., 0., 1.])), ('HT6W47', ': ', array([ 0, 0, 0, 44]), ' ', array([ 0., 0., 0., 1.]), ' ', array([ 0., 0., 0., 1.])), ('HT6W48', ': ', array([ 0, 0, 0, 46]), ' ', array([ 0., 0., 0., 1.]), ' ', array([ 0., 0…	10110010	1	0.507191	1	1
258	5	114330236	CAGxTCA	T	C	[('HT6W37', ': ', array([ 0, 44, 0, 0]), ' ', array([ 0., 1., 0., 0.]), ' ', array([ 0., 1., 0., 0.])), ('HT6W45', ': ', array([ 0, 41, 0, 0]), ' ', array([ 0., 1., 0., 0.]), ' ', array([ 0., 1., 0., 0.])), ('HT6W47', ': ', array([ 0, 42, 0, 0]), ' ', array([ 0., 1., 0., 0.]), ' ', array([ 0., 1., 0., 0.])), ('HT6W48', ': ', array([ 0, 40, 0, 0]), ' ', array([ 0., 1., 0., 0.]), ' ', array([ 0., 1…	100010	1	0.516166	1	1
259	5	117771311	TGTxGGT	T	C	[('HT6W37', ': ', array([ 0, 34, 0, 0]), ' ', array([ 0., 1., 0., 0.]), ' ', array([ 0., 1., 0., 0.])), ('HT6W45', ': ', array([ 0, 37, 0, 0]), ' ', array([ 0., 1., 0., 0.]), ' ', array([ 0., 1., 0., 0.])), ('HT6W47', ': ', array([ 0, 43, 0, 1]), ' ', array([ 0. , 0.97727273, 0. , 0.02272727]), ' ', array([ 0., 1., 0., 0.])), ('HT6W48', ': ', array([ 0, 32, 0, 0]), ' ', array([ 0., 1., 0., 0.]), …	10110010	0.993506	0.463685	1	1
260	5	119760090	AGAxATT	G	T	[('HT6W37', ': ', array([ 0, 0, 0, 31]), ' ', array([ 0., 0., 0., 1.]), ' ', array([ 0., 0., 0., 1.])), ('HT6W45', ': ', array([ 0, 0, 0, 21]), ' ', array([ 0., 0., 0., 1.]), ' ', array([ 0., 0., 0., 1.])), ('HT6W47', ': ', array([ 0, 0, 0, 29]), ' ', array([ 0., 0., 0., 1.]), ' ', array([ 0., 0., 0., 1.])), ('HT6W48', ': ', array([ 0, 0, 0, 32]), ' ', array([ 0., 0., 0., 1.]), ' ', array([ 0., 0…	100010	0.996416	0.629368	1	1
261	5	120407340	AAAxTAA	A	G	[('HT6W37', ': ', array([32, 0, 0, 0]), ' ', array([ 1., 0., 0., 0.]), ' ', array([ 1., 0., 0., 0.])), ('HT6W45', ': ', array([34, 0, 1, 0]), ' ', array([ 0.97142857, 0. , 0.02857143, 0. ]), ' ', array([ 1., 0., 0., 0.])), ('HT6W47', ': ', array([37, 0, 0, 0]), ' ', array([ 1., 0., 0., 0.]), ' ', array([ 1., 0., 0., 0.])), ('HT6W48', ': ', array([40, 0, 0, 0]), ' ', array([ 1., 0., 0., 0.]), ' ',…	100010	0.995115	0.51641	1	1
262	5	121076228	ATAxGCC	A	C	[('HT6W37', ': ', array([37, 0, 0, 1]), ' ', array([ 0.97368421, 0. , 0. , 0.02631579]), ' ', array([ 1., 0., 0., 0.])), ('HT6W45', ': ', array([45, 0, 0, 0]), ' ', array([ 1., 0., 0., 0.]), ' ', array([ 1., 0., 0., 0.])), ('HT6W47', ': ', array([42, 0, 0, 0]), ' ', array([ 1., 0., 0., 0.]), ' ', array([ 1., 0., 0., 0.])), ('HT6W48', ': ', array([53, 0, 0, 0]), ' ', array([ 1., 0., 0., 0.]), ' ',…	10110010	0.996241	0.478021	1	1
263	5	121491192	GCCxTTT	C	A	[('HT6W37', ': ', array([ 0, 0, 37, 0]), ' ', array([ 0., 0., 1., 0.]), ' ', array([ 0., 0., 1., 0.])), ('HT6W45', ': ', array([ 0, 0, 36, 1]), ' ', array([ 0. , 0. , 0.97297297, 0.02702703]), ' ', array([ 0., 0., 1., 0.])), ('HT6W47', ': ', array([ 0, 0, 40, 0]), ' ', array([ 0., 0., 1., 0.]), ' ', array([ 0., 0., 1., 0.])), ('HT6W48', ': ', array([ 0, 0, 37, 0]), ' ', array([ 0., 0., 1., 0.]), …	100010	0.996528	0.485294	1	1
264	5	122353067	ATTxTTG	T	G	[('HT6W37', ': ', array([ 0, 39, 0, 0]), ' ', array([ 0., 1., 0., 0.]), ' ', array([ 0., 1., 0., 0.])), ('HT6W45', ': ', array([ 0, 39, 0, 0]), ' ', array([ 0., 1., 0., 0.]), ' ', array([ 0., 1., 0., 0.])), ('HT6W47', ': ', array([ 0, 30, 0, 0]), ' ', array([ 0., 1., 0., 0.]), ' ', array([ 0., 1., 0., 0.])), ('HT6W48', ': ', array([ 0, 35, 0, 0]), ' ', array([ 0., 1., 0., 0.]), ' ', array([ 0., 1…	100010	0.997416	0.468687	1	1
265	5	129836992	GTTxTTT	C	A	[('HT6W37', ': ', array([ 0, 0, 50, 0]), ' ', array([ 0., 0., 1., 0.]), ' ', array([ 0., 0., 1., 0.])), ('HT6W45', ': ', array([ 0, 0, 38, 0]), ' ', array([ 0., 0., 1., 0.]), ' ', array([ 0., 0., 1., 0.])), ('HT6W47', ': ', array([ 0, 0, 31, 1]), ' ', array([ 0. , 0. , 0.96875, 0.03125]), ' ', array([ 0., 0., 1., 0.])), ('HT6W48', ': ', array([ 0, 0, 33, 1]), ' ', array([ 0. , 0. , 0.97058824, 0.…	100010	0.990336	0.340035	1	1
266	5	147614444	AAAxAGA	G	T	[('HT6W37', ': ', array([ 0, 1, 0, 14]), ' ', array([ 0. , 0.06666667, 0. , 0.93333333]), ' ', array([ 0., 0., 0., 1.])), ('HT6W45', ': ', array([ 0, 0, 0, 22]), ' ', array([ 0., 0., 0., 1.]), ' ', array([ 0., 0., 0., 1.])), ('HT6W47', ': ', array([ 0, 0, 0, 28]), ' ', array([ 0., 0., 0., 1.]), ' ', array([ 0., 0., 0., 1.])), ('HT6W48', ': ', array([ 0, 0, 0, 17]), ' ', array([ 0., 0., 0., 1.]), …	10110010	0.990476	0.492634	0.999817	1
267	5	147921939	ACTxCAG	C	G	[('HT6W37', ': ', array([ 0, 0, 40, 0]), ' ', array([ 0., 0., 1., 0.]), ' ', array([ 0., 0., 1., 0.])), ('HT6W45', ': ', array([ 0, 0, 37, 0]), ' ', array([ 0., 0., 1., 0.]), ' ', array([ 0., 0., 1., 0.])), ('HT6W47', ': ', array([ 0, 0, 43, 0]), ' ', array([ 0., 0., 1., 0.]), ' ', array([ 0., 0., 1., 0.])), ('HT6W48', ': ', array([ 0, 0, 44, 0]), ' ', array([ 0., 0., 1., 0.]), ' ', array([ 0., 0…	100010	0.992723	0.458543	1	1
268	5	151584090	TATxTGA	A	G	[('HT6W37', ': ', array([47, 0, 0, 0]), ' ', array([ 1., 0., 0., 0.]), ' ', array([ 1., 0., 0., 0.])), ('HT6W45', ': ', array([32, 0, 0, 0]), ' ', array([ 1., 0., 0., 0.]), ' ', array([ 1., 0., 0., 0.])), ('HT6W47', ': ', array([44, 0, 0, 0]), ' ', array([ 1., 0., 0., 0.]), ' ', array([ 1., 0., 0., 0.])), ('HT6W48', ': ', array([38, 0, 0, 0]), ' ', array([ 1., 0., 0., 0.]), ' ', array([ 1., 0., 0…	10110010	0.990895	0.537791	1	1
269	5	151922132	ATAxATT	G	T	[('HT6W37', ': ', array([ 0, 0, 0, 26]), ' ', array([ 0., 0., 0., 1.]), ' ', array([ 0., 0., 0., 1.])), ('HT6W45', ': ', array([ 0, 0, 0, 39]), ' ', array([ 0., 0., 0., 1.]), ' ', array([ 0., 0., 0., 1.])), ('HT6W47', ': ', array([ 0, 0, 0, 34]), ' ', array([ 0., 0., 0., 1.]), ' ', array([ 0., 0., 0., 1.])), ('HT6W48', ': ', array([ 0, 0, 0, 40]), ' ', array([ 0., 0., 0., 1.]), ' ', array([ 0., 0…	10110010	1	0.547511	1	1
270	5	153103908	CTCxTCC	C	A	[('HT6W37', ': ', array([ 0, 0, 43, 0]), ' ', array([ 0., 0., 1., 0.]), ' ', array([ 0., 0., 1., 0.])), ('HT6W45', ': ', array([ 0, 0, 46, 0]), ' ', array([ 0., 0., 1., 0.]), ' ', array([ 0., 0., 1., 0.])), ('HT6W47', ': ', array([ 0, 0, 42, 0]), ' ', array([ 0., 0., 1., 0.]), ' ', array([ 0., 0., 1., 0.])), ('HT6W48', ': ', array([ 0, 0, 46, 0]), ' ', array([ 0., 0., 1., 0.]), ' ', array([ 0., 0…	100010	0.997531	0.537168	1	1
271	5	153220883	TATxTCT	C	A	[('HT6W37', ': ', array([ 0, 0, 48, 0]), ' ', array([ 0., 0., 1., 0.]), ' ', array([ 0., 0., 1., 0.])), ('HT6W45', ': ', array([ 0, 0, 29, 0]), ' ', array([ 0., 0., 1., 0.]), ' ', array([ 0., 0., 1., 0.])), ('HT6W47', ': ', array([ 0, 0, 47, 0]), ' ', array([ 0., 0., 1., 0.]), ' ', array([ 0., 0., 1., 0.])), ('HT6W48', ': ', array([ 0, 0, 39, 0]), ' ', array([ 0., 0., 1., 0.]), ' ', array([ 0., 0…	100010	1	0.479717	1	1
272	5	157768647	AACxAAA	C	T	[('HT6W37', ': ', array([ 0, 0, 34, 0]), ' ', array([ 0., 0., 1., 0.]), ' ', array([ 0., 0., 1., 0.])), ('HT6W45', ': ', array([ 1, 0, 44, 0]), ' ', array([ 0.02222222, 0. , 0.97777778, 0. ]), ' ', array([ 0., 0., 1., 0.])), ('HT6W47', ': ', array([ 0, 0, 35, 0]), ' ', array([ 0., 0., 1., 0.]), ' ', array([ 0., 0., 1., 0.])), ('HT6W48', ': ', array([ 0, 0, 30, 0]), ' ', array([ 0., 0., 1., 0.]), …	100010	0.997732	0.405285	1	1
273	5	161780659	CTTxATT	A	G	[('HT6W37', ': ', array([18, 0, 22, 0]), ' ', array([ 0.45, 0. , 0.55, 0. ]), ' ', array([ 1., 0., 1., 0.])), ('HT6W45', ': ', array([ 0, 0, 15, 18]), ' ', array([ 0. , 0. , 0.45454545, 0.54545455]), ' ', array([ 0., 0., 1., 1.])), ('HT6W47', ': ', array([20, 0, 23, 0]), ' ', array([ 0.46511628, 0. , 0.53488372, 0. ]), ' ', array([ 1., 0., 1., 0.])), ('HT6W48', ': ', array([ 0, 0, 18, 17]), ' ', …	10100001101	0.504826	0.541911	1	1
274	5	163525051	GTTxGTG	G	T	[('HT6W37', ': ', array([ 0, 0, 0, 44]), ' ', array([ 0., 0., 0., 1.]), ' ', array([ 0., 0., 0., 1.])), ('HT6W45', ': ', array([ 0, 0, 0, 35]), ' ', array([ 0., 0., 0., 1.]), ' ', array([ 0., 0., 0., 1.])), ('HT6W47', ': ', array([ 0, 0, 0, 45]), ' ', array([ 0., 0., 0., 1.]), ' ', array([ 0., 0., 0., 1.])), ('HT6W48', ': ', array([ 0, 0, 0, 48]), ' ', array([ 0., 0., 0., 1.]), ' ', array([ 0., 0…	100010	0.995556	0.537338	1	1
275	5	164104960	TCTxTTG	C	A	[('HT6W37', ': ', array([ 0, 0, 31, 0]), ' ', array([ 0., 0., 1., 0.]), ' ', array([ 0., 0., 1., 0.])), ('HT6W45', ': ', array([ 0, 0, 42, 0]), ' ', array([ 0., 0., 1., 0.]), ' ', array([ 0., 0., 1., 0.])), ('HT6W47', ': ', array([ 1, 0, 35, 0]), ' ', array([ 0.02777778, 0. , 0.97222222, 0. ]), ' ', array([ 0., 0., 1., 0.])), ('HT6W48', ': ', array([ 0, 0, 42, 0]), ' ', array([ 0., 0., 1., 0.]), …	100010	0.987352	0.469208	1	1
276	5	164175053	CTGxAGC	G	C	[('HT6W37', ': ', array([ 0, 0, 0, 34]), ' ', array([ 0., 0., 0., 1.]), ' ', array([ 0., 0., 0., 1.])), ('HT6W45', ': ', array([ 0, 0, 0, 51]), ' ', array([ 0., 0., 0., 1.]), ' ', array([ 0., 0., 0., 1.])), ('HT6W47', ': ', array([ 0, 0, 0, 34]), ' ', array([ 0., 0., 0., 1.]), ' ', array([ 0., 0., 0., 1.])), ('HT6W48', ': ', array([ 0, 0, 0, 31]), ' ', array([ 0., 0., 0., 1.]), ' ', array([ 0., 0…	100010	0.997778	0.555861	1	1
277	5	165213811	GCCxATA	A	T	[('HT6W37', ': ', array([40, 0, 0, 0]), ' ', array([ 1., 0., 0., 0.]), ' ', array([ 1., 0., 0., 0.])), ('HT6W45', ': ', array([28, 1, 0, 0]), ' ', array([ 0.96551724, 0.03448276, 0. , 0. ]), ' ', array([ 1., 0., 0., 0.])), ('HT6W47', ': ', array([41, 0, 0, 0]), ' ', array([ 1., 0., 0., 0.]), ' ', array([ 1., 0., 0., 0.])), ('HT6W48', ': ', array([33, 0, 1, 0]), ' ', array([ 0.97058824, 0. , 0.029…	10110010	0.98452	0.481092	1	1
278	5	166189094	TCTxTCC	C	A	[('HT6W37', ': ', array([ 1, 0, 22, 0]), ' ', array([ 0.04347826, 0. , 0.95652174, 0. ]), ' ', array([ 0., 0., 1., 0.])), ('HT6W45', ': ', array([ 0, 0, 31, 0]), ' ', array([ 0., 0., 1., 0.]), ' ', array([ 0., 0., 1., 0.])), ('HT6W47', ': ', array([ 0, 0, 53, 0]), ' ', array([ 0., 0., 1., 0.]), ' ', array([ 0., 0., 1., 0.])), ('HT6W48', ': ', array([ 0, 0, 38, 0]), ' ', array([ 0., 0., 1., 0.]), …	100010	0.991697	0.629573	1	1
279	5	167185929	TCCxTAA	T	G	[('HT6W37', ': ', array([ 0, 37, 0, 0]), ' ', array([ 0., 1., 0., 0.]), ' ', array([ 0., 1., 0., 0.])), ('HT6W45', ': ', array([ 0, 29, 0, 0]), ' ', array([ 0., 1., 0., 0.]), ' ', array([ 0., 1., 0., 0.])), ('HT6W47', ': ', array([ 0, 45, 1, 0]), ' ', array([ 0. , 0.97826087, 0.02173913, 0. ]), ' ', array([ 0., 1., 0., 0.])), ('HT6W48', ': ', array([ 0, 29, 1, 0]), ' ', array([ 0. , 0.96666667, 0…	100010	0.988017	0.53125	1	1
280	5	168326703	ATAxATT	A	C	[('HT6W37', ': ', array([40, 0, 0, 0]), ' ', array([ 1., 0., 0., 0.]), ' ', array([ 1., 0., 0., 0.])), ('HT6W45', ': ', array([29, 0, 0, 1]), ' ', array([ 0.96666667, 0. , 0. , 0.03333333]), ' ', array([ 1., 0., 0., 0.])), ('HT6W47', ': ', array([50, 0, 0, 1]), ' ', array([ 0.98039216, 0. , 0. , 0.01960784]), ' ', array([ 1., 0., 0., 0.])), ('HT6W48', ': ', array([46, 1, 0, 0]), ' ', array([ 0.97…	10110010	0.982047	0.506736	1	1
281	5	168989306	TTCxTTC	C	A	[('HT6W37', ': ', array([ 0, 0, 31, 0]), ' ', array([ 0., 0., 1., 0.]), ' ', array([ 0., 0., 1., 0.])), ('HT6W45', ': ', array([ 0, 0, 29, 0]), ' ', array([ 0., 0., 1., 0.]), ' ', array([ 0., 0., 1., 0.])), ('HT6W47', ': ', array([ 1, 0, 42, 0]), ' ', array([ 0.02325581, 0. , 0.97674419, 0. ]), ' ', array([ 0., 0., 1., 0.])), ('HT6W48', ': ', array([ 0, 0, 34, 0]), ' ', array([ 0., 0., 1., 0.]), …	100010	0.997416	0.423026	1	1
282	6	1678940	AGAxATA	G	A	[('HT6W37', ': ', array([ 0, 0, 0, 43]), ' ', array([ 0., 0., 0., 1.]), ' ', array([ 0., 0., 0., 1.])), ('HT6W45', ': ', array([ 0, 0, 0, 36]), ' ', array([ 0., 0., 0., 1.]), ' ', array([ 0., 0., 0., 1.])), ('HT6W47', ': ', array([ 0, 1, 1, 44]), ' ', array([ 0. , 0.02173913, 0.02173913, 0.95652174]), ' ', array([ 0., 0., 0., 1.])), ('HT6W48', ': ', array([ 0, 1, 0, 41]), ' ', array([ 0. , 0.0238…	10110010	0.974507	0.446012	1	1
283	6	5767235	TTTxTAT	T	G	[('HT6W37', ': ', array([ 0, 28, 0, 0]), ' ', array([ 0., 1., 0., 0.]), ' ', array([ 0., 1., 0., 0.])), ('HT6W45', ': ', array([ 0, 32, 0, 0]), ' ', array([ 0., 1., 0., 0.]), ' ', array([ 0., 1., 0., 0.])), ('HT6W47', ': ', array([ 0, 45, 0, 0]), ' ', array([ 0., 1., 0., 0.]), ' ', array([ 0., 1., 0., 0.])), ('HT6W48', ': ', array([ 0, 33, 0, 0]), ' ', array([ 0., 1., 0., 0.]), ' ', array([ 0., 1…	10110010	0.997085	0.494842	1	1
284	6	7501562	GCTxTGA	T	C	[('HT6W37', ': ', array([ 0, 43, 0, 0]), ' ', array([ 0., 1., 0., 0.]), ' ', array([ 0., 1., 0., 0.])), ('HT6W45', ': ', array([ 0, 27, 0, 0]), ' ', array([ 0., 1., 0., 0.]), ' ', array([ 0., 1., 0., 0.])), ('HT6W47', ': ', array([ 0, 48, 0, 0]), ' ', array([ 0., 1., 0., 0.]), ' ', array([ 0., 1., 0., 0.])), ('HT6W48', ': ', array([ 0, 20, 0, 0]), ' ', array([ 0., 1., 0., 0.]), ' ', array([ 0., 1…	10110010	0.976751	0.513102	1	1
285	6	16072263	TGAxAAT	A	G	[('HT6W37', ': ', array([35, 0, 0, 0]), ' ', array([ 1., 0., 0., 0.]), ' ', array([ 1., 0., 0., 0.])), ('HT6W45', ': ', array([36, 0, 0, 0]), ' ', array([ 1., 0., 0., 0.]), ' ', array([ 1., 0., 0., 0.])), ('HT6W47', ': ', array([52, 0, 0, 0]), ' ', array([ 1., 0., 0., 0.]), ' ', array([ 1., 0., 0., 0.])), ('HT6W48', ': ', array([43, 1, 0, 0]), ' ', array([ 0.97727273, 0.02272727, 0. , 0. ]), ' ',…	100010	0.992747	0.515912	1	1
286	6	18901185	AGAxGTT	A	C	[('HT6W37', ': ', array([27, 0, 0, 0]), ' ', array([ 1., 0., 0., 0.]), ' ', array([ 1., 0., 0., 0.])), ('HT6W45', ': ', array([31, 0, 0, 0]), ' ', array([ 1., 0., 0., 0.]), ' ', array([ 1., 0., 0., 0.])), ('HT6W47', ': ', array([34, 1, 1, 0]), ' ', array([ 0.94444444, 0.02777778, 0.02777778, 0. ]), ' ', array([ 1., 0., 0., 0.])), ('HT6W48', ': ', array([39, 0, 0, 0]), ' ', array([ 1., 0., 0., 0.]…	10110010	0.982601	0.488436	1	1
287	6	18930216	AATxTCT	C	A	[('HT6W37', ': ', array([ 0, 0, 28, 0]), ' ', array([ 0., 0., 1., 0.]), ' ', array([ 0., 0., 1., 0.])), ('HT6W45', ': ', array([ 0, 0, 35, 0]), ' ', array([ 0., 0., 1., 0.]), ' ', array([ 0., 0., 1., 0.])), ('HT6W47', ': ', array([ 0, 0, 36, 0]), ' ', array([ 0., 0., 1., 0.]), ' ', array([ 0., 0., 1., 0.])), ('HT6W48', ': ', array([ 0, 0, 27, 0]), ' ', array([ 0., 0., 1., 0.]), ' ', array([ 0., 0…	10110010	0.986815	0.544397	1	1
288	6	19517790	CAGxAAA	G	C	[('HT6W37', ': ', array([ 0, 0, 1, 39]), ' ', array([ 0. , 0. , 0.02439024, 0.95121951]), ' ', array([ 0., 0., 0., 1.])), ('HT6W45', ': ', array([ 0, 0, 0, 29]), ' ', array([ 0., 0., 0., 1.]), ' ', array([ 0., 0., 0., 1.])), ('HT6W47', ': ', array([ 0, 0, 0, 41]), ' ', array([ 0., 0., 0., 1.]), ' ', array([ 0., 0., 0., 1.])), ('HT6W48', ': ', array([ 0, 0, 0, 39]), ' ', array([ 0., 0., 0., 1.]), …	100010	0.988848	0.563725	1	1
289	6	24796754	CCAxAGT	G	T	[('HT6W37', ': ', array([ 0, 0, 0, 26]), ' ', array([ 0., 0., 0., 1.]), ' ', array([ 0., 0., 0., 1.])), ('HT6W45', ': ', array([ 0, 0, 0, 38]), ' ', array([ 0., 0., 0., 1.]), ' ', array([ 0., 0., 0., 1.])), ('HT6W47', ': ', array([ 0, 0, 0, 39]), ' ', array([ 0., 0., 0., 1.]), ' ', array([ 0., 0., 0., 1.])), ('HT6W48', ': ', array([ 0, 0, 0, 34]), ' ', array([ 0., 0., 0., 1.]), ' ', array([ 0., 0…	10110010	1	0.440087	1	1
290	6	28664598	ATTxTCT	G	T	[('HT6W37', ': ', array([ 0, 1, 0, 43]), ' ', array([ 0. , 0.02272727, 0. , 0.97727273]), ' ', array([ 0., 0., 0., 1.])), ('HT6W45', ': ', array([ 0, 0, 1, 32]), ' ', array([ 0. , 0. , 0.03030303, 0.96969697]), ' ', array([ 0., 0., 0., 1.])), ('HT6W47', ': ', array([ 0, 0, 0, 46]), ' ', array([ 0., 0., 0., 1.]), ' ', array([ 0., 0., 0., 1.])), ('HT6W48', ': ', array([ 0, 0, 0, 45]), ' ', array([ …	10110010	0.996753	0.511142	1	1
291	6	48451172	GATxCAT	T	G	[('HT6W37', ': ', array([ 0, 33, 1, 0]), ' ', array([ 0. , 0.97058824, 0.02941176, 0. ]), ' ', array([ 0., 1., 0., 0.])), ('HT6W45', ': ', array([ 0, 32, 0, 0]), ' ', array([ 0., 1., 0., 0.]), ' ', array([ 0., 1., 0., 0.])), ('HT6W47', ': ', array([ 0, 44, 2, 1]), ' ', array([ 0. , 0.91666667, 0.04166667, 0.02083333]), ' ', array([ 0., 1., 0., 0.])), ('HT6W48', ': ', array([ 0, 40, 0, 0]), ' ', a…	10110010	0.982819	0.52797	1	1
292	6	48635599	GAAxAAA	A	C	[('HT6W37', ': ', array([40, 0, 0, 0]), ' ', array([ 1., 0., 0., 0.]), ' ', array([ 1., 0., 0., 0.])), ('HT6W45', ': ', array([37, 0, 0, 0]), ' ', array([ 1., 0., 0., 0.]), ' ', array([ 1., 0., 0., 0.])), ('HT6W47', ': ', array([55, 0, 0, 0]), ' ', array([ 1., 0., 0., 0.]), ' ', array([ 1., 0., 0., 0.])), ('HT6W48', ': ', array([47, 0, 0, 0]), ' ', array([ 1., 0., 0., 0.]), ' ', array([ 1., 0., 0…	10110010	1	0.505244	1	1
293	6	67495989	GGTxCCA	T	A	[('HT6W37', ': ', array([ 0, 41, 1, 0]), ' ', array([ 0. , 0.97619048, 0.02380952, 0. ]), ' ', array([ 0., 1., 0., 0.])), ('HT6W45', ': ', array([ 0, 30, 0, 0]), ' ', array([ 0., 1., 0., 0.]), ' ', array([ 0., 1., 0., 0.])), ('HT6W47', ': ', array([ 0, 38, 0, 0]), ' ', array([ 0., 1., 0., 0.]), ' ', array([ 0., 1., 0., 0.])), ('HT6W48', ': ', array([ 0, 38, 0, 1]), ' ', array([ 0. , 0.97435897, 0…	100010	0.986677	0.560256	1	1
294	6	72667283	AATxTAT	C	A	[('HT6W37', ': ', array([ 1, 0, 30, 0]), ' ', array([ 0.03225806, 0. , 0.96774194, 0. ]), ' ', array([ 0., 0., 1., 0.])), ('HT6W45', ': ', array([ 1, 0, 44, 0]), ' ', array([ 0.02222222, 0. , 0.97777778, 0. ]), ' ', array([ 0., 0., 1., 0.])), ('HT6W47', ': ', array([ 0, 0, 38, 0]), ' ', array([ 0., 0., 1., 0.]), ' ', array([ 0., 0., 1., 0.])), ('HT6W48', ': ', array([ 0, 0, 50, 0]), ' ', array([ …	10110010	0.988066	0.447684	1	1
295	6	88751527	ATGxAAT	A	G	[('HT6W37', ': ', array([47, 0, 0, 0]), ' ', array([ 1., 0., 0., 0.]), ' ', array([ 1., 0., 0., 0.])), ('HT6W45', ': ', array([29, 0, 0, 0]), ' ', array([ 1., 0., 0., 0.]), ' ', array([ 1., 0., 0., 0.])), ('HT6W47', ': ', array([36, 0, 1, 0]), ' ', array([ 0.97297297, 0. , 0.02702703, 0. ]), ' ', array([ 1., 0., 0., 0.])), ('HT6W48', ': ', array([56, 0, 0, 0]), ' ', array([ 1., 0., 0., 0.]), ' ',…	100010	0.99137	0.457184	1	1
296	6	94071931	GCAxAAC	A	C	[('HT6W37', ': ', array([37, 0, 1, 0]), ' ', array([ 0.97368421, 0. , 0.02631579, 0. ]), ' ', array([ 1., 0., 0., 0.])), ('HT6W45', ': ', array([26, 0, 1, 1]), ' ', array([ 0.92857143, 0. , 0.03571429, 0.03571429]), ' ', array([ 1., 0., 0., 0.])), ('HT6W47', ': ', array([39, 0, 0, 0]), ' ', array([ 1., 0., 0., 0.]), ' ', array([ 1., 0., 0., 0.])), ('HT6W48', ': ', array([40, 0, 0, 0]), ' ', array…	100010	0.994607	0.456767	1	1
297	6	95159200	TCCxTCC	C	A	[('HT6W37', ': ', array([ 0, 0, 27, 0]), ' ', array([ 0., 0., 1., 0.]), ' ', array([ 0., 0., 1., 0.])), ('HT6W45', ': ', array([ 0, 0, 37, 0]), ' ', array([ 0., 0., 1., 0.]), ' ', array([ 0., 0., 1., 0.])), ('HT6W47', ': ', array([ 0, 0, 38, 0]), ' ', array([ 0., 0., 1., 0.]), ' ', array([ 0., 0., 1., 0.])), ('HT6W48', ': ', array([ 0, 0, 46, 0]), ' ', array([ 0., 0., 1., 0.]), ' ', array([ 0., 0…	10110010	0.991673	0.510398	1	1
298	6	97528066	ATTxTCC	T	G	[('HT6W37', ': ', array([ 0, 34, 1, 0]), ' ', array([ 0. , 0.97142857, 0.02857143, 0. ]), ' ', array([ 0., 1., 0., 0.])), ('HT6W45', ': ', array([ 0, 34, 0, 0]), ' ', array([ 0., 1., 0., 0.]), ' ', array([ 0., 1., 0., 0.])), ('HT6W47', ': ', array([ 0, 48, 0, 0]), ' ', array([ 0., 1., 0., 0.]), ' ', array([ 0., 1., 0., 0.])), ('HT6W48', ': ', array([ 0, 31, 0, 0]), ' ', array([ 0., 1., 0., 0.]), …	10110010	0.992159	0.420477	1	1
299	6	104797556	GACxTAT	C	A	[('HT6W37', ': ', array([ 0, 0, 52, 0]), ' ', array([ 0., 0., 1., 0.]), ' ', array([ 0., 0., 1., 0.])), ('HT6W45', ': ', array([ 0, 0, 38, 0]), ' ', array([ 0., 0., 1., 0.]), ' ', array([ 0., 0., 1., 0.])), ('HT6W47', ': ', array([ 1, 0, 34, 1]), ' ', array([ 0.02777778, 0. , 0.94444444, 0.02777778]), ' ', array([ 0., 0., 1., 0.])), ('HT6W48', ': ', array([ 1, 0, 53, 0]), ' ', array([ 0.01851852,…	10110010	0.986096	0.50967	1	1
300	6	106881231	GAAxCTG	G	T	[('HT6W37', ': ', array([ 0, 0, 0, 34]), ' ', array([ 0., 0., 0., 1.]), ' ', array([ 0., 0., 0., 1.])), ('HT6W45', ': ', array([ 0, 0, 0, 36]), ' ', array([ 0., 0., 0., 1.]), ' ', array([ 0., 0., 0., 1.])), ('HT6W47', ': ', array([ 0, 0, 0, 43]), ' ', array([ 0., 0., 0., 1.]), ' ', array([ 0., 0., 0., 1.])), ('HT6W48', ': ', array([ 0, 1, 0, 40]), ' ', array([ 0. , 0.02439024, 0. , 0.97560976]), …	10110010	0.996516	0.53949	1	1
301	6	115104230	AAAxAAA	G	T	[('HT6W37', ': ', array([ 0, 0, 0, 45]), ' ', array([ 0., 0., 0., 1.]), ' ', array([ 0., 0., 0., 1.])), ('HT6W45', ': ', array([ 0, 0, 0, 37]), ' ', array([ 0., 0., 0., 1.]), ' ', array([ 0., 0., 0., 1.])), ('HT6W47', ': ', array([ 0, 0, 0, 35]), ' ', array([ 0., 0., 0., 1.]), ' ', array([ 0., 0., 0., 1.])), ('HT6W48', ': ', array([ 0, 0, 0, 44]), ' ', array([ 0., 0., 0., 1.]), ' ', array([ 0., 0…	10110010	0.995671	0.536782	1	1
302	6	116661722	GGTxTAC	A	G	[('HT6W37', ': ', array([47, 0, 0, 1]), ' ', array([ 0.97916667, 0. , 0. , 0.02083333]), ' ', array([ 1., 0., 0., 0.])), ('HT6W45', ': ', array([41, 0, 0, 0]), ' ', array([ 1., 0., 0., 0.]), ' ', array([ 1., 0., 0., 0.])), ('HT6W47', ': ', array([34, 0, 3, 0]), ' ', array([ 0.91891892, 0. , 0.08108108, 0. ]), ' ', array([ 1., 0., 0., 0.])), ('HT6W48', ': ', array([36, 0, 0, 0]), ' ', array([ 1., …	10110010	0.982935	0.575381	1	1
303	6	122507837	AGAxTTA	G	A	[('HT6W37', ': ', array([ 0, 0, 0, 43]), ' ', array([ 0., 0., 0., 1.]), ' ', array([ 0., 0., 0., 1.])), ('HT6W45', ': ', array([ 0, 0, 0, 33]), ' ', array([ 0., 0., 0., 1.]), ' ', array([ 0., 0., 0., 1.])), ('HT6W47', ': ', array([ 0, 0, 0, 45]), ' ', array([ 0., 0., 0., 1.]), ' ', array([ 0., 0., 0., 1.])), ('HT6W48', ': ', array([ 0, 0, 0, 45]), ' ', array([ 0., 0., 0., 1.]), ' ', array([ 0., 0…	10110010	1	0.468816	1	1
304	6	124543177	CTTxTAG	C	A	[('HT6W37', ': ', array([ 0, 0, 36, 0]), ' ', array([ 0., 0., 1., 0.]), ' ', array([ 0., 0., 1., 0.])), ('HT6W45', ': ', array([ 0, 0, 37, 0]), ' ', array([ 0. , 0. , 0.97368421, 0. ]), ' ', array([ 0., 0., 1., 0.])), ('HT6W47', ': ', array([ 0, 0, 43, 0]), ' ', array([ 0., 0., 1., 0.]), ' ', array([ 0., 0., 1., 0.])), ('HT6W48', ': ', array([ 0, 0, 43, 0]), ' ', array([ 0., 0., 1., 0.]), ' ', ar…	10110010	0.988701	0.51375	1	1
305	6	133463662	GCCxCAA	G	A	[('HT6W37', ': ', array([ 0, 0, 0, 46]), ' ', array([ 0., 0., 0., 1.]), ' ', array([ 0., 0., 0., 1.])), ('HT6W45', ': ', array([ 0, 1, 0, 44]), ' ', array([ 0. , 0.02222222, 0. , 0.97777778]), ' ', array([ 0., 0., 0., 1.])), ('HT6W47', ': ', array([ 0, 0, 0, 58]), ' ', array([ 0., 0., 0., 1.]), ' ', array([ 0., 0., 0., 1.])), ('HT6W48', ': ', array([ 0, 0, 0, 37]), ' ', array([ 0., 0., 0., 1.]), …	10110010	0.993231	0.453637	1	1
306	6	137787754	GAGxGAA	G	T	[('HT6W37', ': ', array([ 0, 0, 0, 36]), ' ', array([ 0., 0., 0., 1.]), ' ', array([ 0., 0., 0., 1.])), ('HT6W45', ': ', array([ 1, 0, 0, 28]), ' ', array([ 0.03448276, 0. , 0. , 0.96551724]), ' ', array([ 0., 0., 0., 1.])), ('HT6W47', ': ', array([ 0, 0, 0, 39]), ' ', array([ 0., 0., 0., 1.]), ' ', array([ 0., 0., 0., 1.])), ('HT6W48', ': ', array([ 0, 1, 0, 51]), ' ', array([ 0. , 0.01923077, 0…	10110010	0.986924	0.449939	1	1
307	6	141548283	AAAxTTT	T	A	[('HT6W37', ': ', array([ 0, 46, 0, 0]), ' ', array([ 0., 1., 0., 0.]), ' ', array([ 0., 1., 0., 0.])), ('HT6W45', ': ', array([ 0, 43, 0, 0]), ' ', array([ 0., 1., 0., 0.]), ' ', array([ 0., 1., 0., 0.])), ('HT6W47', ': ', array([ 0, 52, 0, 1]), ' ', array([ 0. , 0.98113208, 0. , 0.01886792]), ' ', array([ 0., 1., 0., 0.])), ('HT6W48', ': ', array([ 0, 54, 0, 0]), ' ', array([ 0., 1., 0., 0.]), …	10110010	0.990988	0.547885	1	1
308	6	147351615	CACxTAG	A	C	[('HT6W37', ': ', array([35, 0, 2, 0]), ' ', array([ 0.94594595, 0. , 0.05405405, 0. ]), ' ', array([ 1., 0., 0., 0.])), ('HT6W45', ': ', array([39, 0, 0, 0]), ' ', array([ 1., 0., 0., 0.]), ' ', array([ 1., 0., 0., 0.])), ('HT6W47', ': ', array([46, 0, 0, 0]), ' ', array([ 1., 0., 0., 0.]), ' ', array([ 1., 0., 0., 0.])), ('HT6W48', ': ', array([41, 0, 0, 0]), ' ', array([ 1., 0., 0., 0.]), ' ',…	10110010	0.984567	0.422049	1	1
309	6	148375724	CTGxGAG	A	G	[('HT6W37', ': ', array([46, 0, 0, 0]), ' ', array([ 1., 0., 0., 0.]), ' ', array([ 1., 0., 0., 0.])), ('HT6W45', ': ', array([35, 0, 0, 0]), ' ', array([ 1., 0., 0., 0.]), ' ', array([ 1., 0., 0., 0.])), ('HT6W47', ': ', array([49, 0, 0, 0]), ' ', array([ 1., 0., 0., 0.]), ' ', array([ 1., 0., 0., 0.])), ('HT6W48', ': ', array([30, 0, 0, 0]), ' ', array([ 1., 0., 0., 0.]), ' ', array([ 1., 0., 0…	10110010	0.996139	0.503072	1	1
310	6	161596023	GGGxTGA	A	G	[('HT6W37', ': ', array([38, 0, 0, 0]), ' ', array([ 1., 0., 0., 0.]), ' ', array([ 1., 0., 0., 0.])), ('HT6W45', ': ', array([26, 0, 1, 0]), ' ', array([ 0.96296296, 0. , 0.03703704, 0. ]), ' ', array([ 1., 0., 0., 0.])), ('HT6W47', ': ', array([45, 0, 0, 0]), ' ', array([ 1., 0., 0., 0.]), ' ', array([ 1., 0., 0., 0.])), ('HT6W48', ': ', array([39, 0, 0, 0]), ' ', array([ 1., 0., 0., 0.]), ' ',…	100010	0.986253	0.490842	1	1
311	6	162296691	GAAxAGG	G	A	[('HT6W37', ': ', array([ 0, 0, 1, 38]), ' ', array([ 0. , 0. , 0.02564103, 0.97435897]), ' ', array([ 0., 0., 0., 1.])), ('HT6W45', ': ', array([ 0, 1, 0, 38]), ' ', array([ 0. , 0.02564103, 0. , 0.97435897]), ' ', array([ 0., 0., 0., 1.])), ('HT6W47', ': ', array([ 0, 0, 0, 50]), ' ', array([ 0., 0., 0., 1.]), ' ', array([ 0., 0., 0., 1.])), ('HT6W48', ': ', array([ 0, 0, 0, 40]), ' ', array([ …	10110010	0.991873	0.421691	1	1
312	6	162791878	CTGxAAA	G	A	[('HT6W37', ': ', array([ 0, 0, 1, 40]), ' ', array([ 0. , 0. , 0.02439024, 0.97560976]), ' ', array([ 0., 0., 0., 1.])), ('HT6W45', ': ', array([ 0, 0, 0, 25]), ' ', array([ 0., 0., 0., 1.]), ' ', array([ 0., 0., 0., 1.])), ('HT6W47', ': ', array([ 0, 0, 0, 43]), ' ', array([ 0., 0., 0., 1.]), ' ', array([ 0., 0., 0., 1.])), ('HT6W48', ': ', array([ 0, 0, 0, 40]), ' ', array([ 0., 0., 0., 1.]), …	10110010	0.993031	0.445439	1	1
313	7	4134752	GGTxTTC	C	A	[('HT6W37', ': ', array([ 0, 1, 54, 0]), ' ', array([ 0. , 0.01818182, 0.98181818, 0. ]), ' ', array([ 0., 0., 1., 0.])), ('HT6W45', ': ', array([ 0, 0, 71, 0]), ' ', array([ 0., 0., 1., 0.]), ' ', array([ 0., 0., 1., 0.])), ('HT6W47', ': ', array([ 0, 0, 72, 0]), ' ', array([ 0., 0., 1., 0.]), ' ', array([ 0., 0., 1., 0.])), ('HT6W48', ': ', array([ 0, 0, 61, 0]), ' ', array([ 0., 0., 1., 0.]), …	100010	0.99798	0.284496	1	1
314	7	4298012	GCCxAAA	C	A	[('HT6W37', ': ', array([ 0, 0, 55, 0]), ' ', array([ 0., 0., 1., 0.]), ' ', array([ 0., 0., 1., 0.])), ('HT6W45', ': ', array([ 0, 0, 70, 0]), ' ', array([ 0., 0., 1., 0.]), ' ', array([ 0., 0., 1., 0.])), ('HT6W47', ': ', array([ 1, 0, 92, 0]), ' ', array([ 0.01075269, 0. , 0.98924731, 0. ]), ' ', array([ 0., 0., 1., 0.])), ('HT6W48', ': ', array([ 0, 0, 78, 0]), ' ', array([ 0., 0., 1., 0.]), …	100010	0.99458	0.239245	1	1
315	7	7146687	CTAxGTT	A	C	[('HT6W37', ': ', array([76, 0, 0, 0]), ' ', array([ 1., 0., 0., 0.]), ' ', array([ 1., 0., 0., 0.])), ('HT6W45', ': ', array([84, 0, 0, 0]), ' ', array([ 1., 0., 0., 0.]), ' ', array([ 1., 0., 0., 0.])), ('HT6W47', ': ', array([87, 1, 0, 0]), ' ', array([ 0.97752809, 0.01123596, 0. , 0. ]), ' ', array([ 1., 0., 0., 0.])), ('HT6W48', ': ', array([95, 0, 0, 0]), ' ', array([ 1., 0., 0., 0.]), ' ',…	100010	0.995072	0.28327	1	1
316	7	9321709	CAGxTCT	T	C	[('HT6W37', ': ', array([ 0, 60, 0, 0]), ' ', array([ 0., 1., 0., 0.]), ' ', array([ 0., 1., 0., 0.])), ('HT6W45', ': ', array([ 0, 57, 0, 1]), ' ', array([ 0. , 0.98275862, 0. , 0.01724138]), ' ', array([ 0., 1., 0., 0.])), ('HT6W47', ': ', array([ 0, 96, 0, 1]), ' ', array([ 0. , 0.98969072, 0. , 0.01030928]), ' ', array([ 0., 1., 0., 0.])), ('HT6W48', ': ', array([ 1, 79, 0, 0]), ' ', array([ …	10110010	0.993814	0.228477	1	1
317	7	9976577	TTTxTCT	C	A	[('HT6W37', ': ', array([ 0, 0, 62, 0]), ' ', array([ 0., 0., 1., 0.]), ' ', array([ 0., 0., 1., 0.])), ('HT6W45', ': ', array([ 1, 0, 67, 0]), ' ', array([ 0.01470588, 0. , 0.98529412, 0. ]), ' ', array([ 0., 0., 1., 0.])), ('HT6W47', ': ', array([ 0, 0, 82, 1]), ' ', array([ 0. , 0. , 0.98795181, 0.01204819]), ' ', array([ 0., 0., 1., 0.])), ('HT6W48', ': ', array([ 0, 1, 78, 0]), ' ', array([ …	100010	0.993305	0.267222	1	1
318	7	13462261	AATxAAA	A	G	[('HT6W37', ': ', array([74, 0, 0, 0]), ' ', array([ 1., 0., 0., 0.]), ' ', array([ 1., 0., 0., 0.])), ('HT6W45', ': ', array([74, 0, 0, 0]), ' ', array([ 1., 0., 0., 0.]), ' ', array([ 1., 0., 0., 0.])), ('HT6W47', ': ', array([81, 0, 1, 0]), ' ', array([ 0.98780488, 0. , 0.01219512, 0. ]), ' ', array([ 1., 0., 0., 0.])), ('HT6W48', ': ', array([93, 0, 0, 0]), ' ', array([ 1., 0., 0., 0.]), ' ',…	100010	0.998645	0.287271	1	1
319	7	13499746	CATxAAG	A	G	[('HT6W37', ': ', array([85, 0, 0, 0]), ' ', array([ 1., 0., 0., 0.]), ' ', array([ 1., 0., 0., 0.])), ('HT6W45', ': ', array([61, 0, 0, 0]), ' ', array([ 1., 0., 0., 0.]), ' ', array([ 1., 0., 0., 0.])), ('HT6W47', ': ', array([68, 0, 0, 0]), ' ', array([ 1., 0., 0., 0.]), ' ', array([ 1., 0., 0., 0.])), ('HT6W48', ': ', array([91, 0, 0, 0]), ' ', array([ 1., 0., 0., 0.]), ' ', array([ 1., 0., 0…	10110010	0.998299	0.205649	1	1
320	7	13750644	GAAxACA	T	C	[('HT6W37', ': ', array([ 0, 63, 0, 0]), ' ', array([ 0., 1., 0., 0.]), ' ', array([ 0., 1., 0., 0.])), ('HT6W45', ': ', array([ 0, 82, 0, 0]), ' ', array([ 0., 1., 0., 0.]), ' ', array([ 0., 1., 0., 0.])), ('HT6W47', ': ', array([ 0, 91, 1, 1]), ' ', array([ 0. , 0.97849462, 0.01075269, 0.01075269]), ' ', array([ 0., 1., 0., 0.])), ('HT6W48', ': ', array([ 0, 90, 1, 1]), ' ', array([ 0. , 0.9782…	100010	0.984681	0.239365	1	1
321	7	14420532	AAAxGGA	A	C	[('HT6W37', ': ', array([53, 0, 0, 0]), ' ', array([ 1., 0., 0., 0.]), ' ', array([ 1., 0., 0., 0.])), ('HT6W45', ': ', array([71, 0, 0, 0]), ' ', array([ 1., 0., 0., 0.]), ' ', array([ 1., 0., 0., 0.])), ('HT6W47', ': ', array([103, 0, 0, 0]), ' ', array([ 1., 0., 0., 0.]), ' ', array([ 1., 0., 0., 0.])), ('HT6W48', ': ', array([93, 0, 0, 0]), ' ', array([ 1., 0., 0., 0.]), ' ', array([ 1., 0., …	10110010	0.995014	0.258743	1	1
322	7	15069357	TCAxAAT	A	C	[('HT6W37', ': ', array([63, 0, 0, 0]), ' ', array([ 1., 0., 0., 0.]), ' ', array([ 1., 0., 0., 0.])), ('HT6W45', ': ', array([68, 0, 0, 0]), ' ', array([ 1., 0., 0., 0.]), ' ', array([ 1., 0., 0., 0.])), ('HT6W47', ': ', array([82, 0, 0, 0]), ' ', array([ 1., 0., 0., 0.]), ' ', array([ 1., 0., 0., 0.])), ('HT6W48', ': ', array([93, 0, 1, 0]), ' ', array([ 0.9893617, 0. , 0.0106383, 0. ]), ' ', a…	10110010	0.993578	0.28049	1	1
323	7	15077938	TCTxTAG	G	T	[('HT6W37', ': ', array([ 0, 0, 1, 69]), ' ', array([ 0. , 0. , 0.01428571, 0.98571429]), ' ', array([ 0., 0., 0., 1.])), ('HT6W45', ': ', array([ 0, 1, 1, 71]), ' ', array([ 0. , 0.01369863, 0.01369863, 0.97260274]), ' ', array([ 0., 0., 0., 1.])), ('HT6W47', ': ', array([ 0, 0, 0, 86]), ' ', array([ 0., 0., 0., 1.]), ' ', array([ 0., 0., 0., 1.])), ('HT6W48', ': ', array([ 0, 0, 0, 79]), ' ', a…	100010	0.989508	0.184247	0.999996	1
324	7	16009748	AAGxAAA	A	G	[('HT6W37', ': ', array([85, 0, 0, 0]), ' ', array([ 1., 0., 0., 0.]), ' ', array([ 1., 0., 0., 0.])), ('HT6W45', ': ', array([76, 0, 0, 0]), ' ', array([ 1., 0., 0., 0.]), ' ', array([ 1., 0., 0., 0.])), ('HT6W47', ': ', array([93, 0, 0, 0]), ' ', array([ 1., 0., 0., 0.]), ' ', array([ 1., 0., 0., 0.])), ('HT6W48', ': ', array([85, 0, 0, 0]), ' ', array([ 1., 0., 0., 0.]), ' ', array([ 1., 0., 0…	10110010	0.998639	0.269465	1	1
325	7	19402374	GGTxGTC	C	T	[('HT6W37', ': ', array([ 0, 0, 68, 0]), ' ', array([ 0., 0., 1., 0.]), ' ', array([ 0., 0., 1., 0.])), ('HT6W45', ': ', array([ 0, 0, 72, 0]), ' ', array([ 0., 0., 1., 0.]), ' ', array([ 0., 0., 1., 0.])), ('HT6W47', ': ', array([ 0, 0, 85, 1]), ' ', array([ 0. , 0. , 0.98837209, 0.01162791]), ' ', array([ 0., 0., 1., 0.])), ('HT6W48', ': ', array([ 0, 0, 74, 1]), ' ', array([ 0. , 0. , 0.986666…	10110010	0.996434	0.273173	1	1
326	7	20200338	ATAxTTT	T	G	[('HT6W37', ': ', array([ 0, 65, 0, 0]), ' ', array([ 0., 1., 0., 0.]), ' ', array([ 0., 1., 0., 0.])), ('HT6W45', ': ', array([ 0, 85, 0, 0]), ' ', array([ 0., 1., 0., 0.]), ' ', array([ 0., 1., 0., 0.])), ('HT6W47', ': ', array([ 0, 92, 0, 0]), ' ', array([ 0., 1., 0., 0.]), ' ', array([ 0., 1., 0., 0.])), ('HT6W48', ': ', array([ 0, 92, 0, 0]), ' ', array([ 0., 1., 0., 0.]), ' ', array([ 0., 1…	10110010	0.998413	0.259535	1	1
327	7	20921636	TGAxCAA	A	G	[('HT6W37', ': ', array([69, 0, 0, 0]), ' ', array([ 1., 0., 0., 0.]), ' ', array([ 1., 0., 0., 0.])), ('HT6W45', ': ', array([82, 0, 1, 0]), ' ', array([ 0.98795181, 0. , 0.01204819, 0. ]), ' ', array([ 1., 0., 0., 0.])), ('HT6W47', ': ', array([87, 0, 2, 0]), ' ', array([ 0.97752809, 0. , 0.02247191, 0. ]), ' ', array([ 1., 0., 0., 0.])), ('HT6W48', ': ', array([93, 0, 0, 0]), ' ', array([ 1., …	100010	0.997503	0.241081	1	1
328	7	24319808	ACCxACA	T	G	[('HT6W37', ': ', array([ 0, 56, 0, 0]), ' ', array([ 0., 1., 0., 0.]), ' ', array([ 0., 1., 0., 0.])), ('HT6W45', ': ', array([ 0, 68, 0, 0]), ' ', array([ 0., 1., 0., 0.]), ' ', array([ 0., 1., 0., 0.])), ('HT6W47', ': ', array([ 0, 56, 0, 1]), ' ', array([ 0. , 0.98245614, 0. , 0.01754386]), ' ', array([ 0., 1., 0., 0.])), ('HT6W48', ': ', array([ 0, 74, 0, 0]), ' ', array([ 0., 1., 0., 0.]), …	10110010	0.995262	0.323867	1	1
329	7	29847353	GGAxAGT	A	T	[('HT6W37', ': ', array([59, 0, 0, 1]), ' ', array([ 0.98333333, 0. , 0. , 0.01666667]), ' ', array([ 1., 0., 0., 0.])), ('HT6W45', ': ', array([43, 0, 0, 0]), ' ', array([ 1., 0., 0., 0.]), ' ', array([ 1., 0., 0., 0.])), ('HT6W47', ': ', array([72, 0, 0, 0]), ' ', array([ 1., 0., 0., 0.]), ' ', array([ 1., 0., 0., 0.])), ('HT6W48', ': ', array([66, 0, 1, 0]), ' ', array([ 0.98507463, 0. , 0.014…	10110010	0.986986	0.324417	1	1
330	7	38742042	GCTxTCC	C	A	[('HT6W37', ': ', array([ 0, 1, 45, 0]), ' ', array([ 0. , 0.02173913, 0.97826087, 0. ]), ' ', array([ 0., 0., 1., 0.])), ('HT6W45', ': ', array([ 0, 0, 58, 0]), ' ', array([ 0., 0., 1., 0.]), ' ', array([ 0., 0., 1., 0.])), ('HT6W47', ': ', array([ 0, 0, 76, 0]), ' ', array([ 0., 0., 1., 0.]), ' ', array([ 0., 0., 1., 0.])), ('HT6W48', ': ', array([ 0, 0, 50, 0]), ' ', array([ 0., 0., 1., 0.]), …	100010	0.993632	0.32634	1	1
331	7	45184661	TGGxGTG	A	G	[('HT6W37', ': ', array([61, 0, 0, 1]), ' ', array([ 0.98387097, 0. , 0. , 0.01612903]), ' ', array([ 1., 0., 0., 0.])), ('HT6W45', ': ', array([48, 0, 0, 0]), ' ', array([ 1., 0., 0., 0.]), ' ', array([ 1., 0., 0., 0.])), ('HT6W47', ': ', array([60, 0, 0, 0]), ' ', array([ 1., 0., 0., 0.]), ' ', array([ 1., 0., 0., 0.])), ('HT6W48', ': ', array([62, 0, 1, 0]), ' ', array([ 0.98412698, 0. , 0.015…	100010	0.985006	0.416667	1	1
332	7	45389859	GGAxTCC	A	C	[('HT6W37', ': ', array([51, 1, 0, 0]), ' ', array([ 0.98076923, 0.01923077, 0. , 0. ]), ' ', array([ 1., 0., 0., 0.])), ('HT6W45', ': ', array([57, 0, 1, 0]), ' ', array([ 0.98275862, 0. , 0.01724138, 0. ]), ' ', array([ 1., 0., 0., 0.])), ('HT6W47', ': ', array([55, 0, 0, 1]), ' ', array([ 0.98214286, 0. , 0. , 0.01785714]), ' ', array([ 1., 0., 0., 0.])), ('HT6W48', ': ', array([66, 0, 0, 0]),…	100010	0.981359	0.422896	1	1
333	7	48788699	CCTxCAC	C	A	[('HT6W37', ': ', array([ 0, 0, 51, 0]), ' ', array([ 0., 0., 1., 0.]), ' ', array([ 0., 0., 1., 0.])), ('HT6W45', ': ', array([ 0, 0, 62, 0]), ' ', array([ 0., 0., 1., 0.]), ' ', array([ 0., 0., 1., 0.])), ('HT6W47', ': ', array([ 0, 0, 62, 1]), ' ', array([ 0. , 0. , 0.98412698, 0.01587302]), ' ', array([ 0., 0., 1., 0.])), ('HT6W48', ': ', array([ 0, 0, 63, 0]), ' ', array([ 0., 0., 1., 0.]), …	100010	0.996944	0.312212	1	1
334	7	49023351	GTAxATT	A	C	[('HT6W37', ': ', array([50, 0, 0, 0]), ' ', array([ 1., 0., 0., 0.]), ' ', array([ 1., 0., 0., 0.])), ('HT6W45', ': ', array([41, 0, 1, 0]), ' ', array([ 0.97619048, 0. , 0.02380952, 0. ]), ' ', array([ 1., 0., 0., 0.])), ('HT6W47', ': ', array([56, 0, 0, 1]), ' ', array([ 0.98245614, 0. , 0. , 0.01754386]), ' ', array([ 1., 0., 0., 0.])), ('HT6W48', ': ', array([51, 0, 0, 0]), ' ', array([ 1., …	10110010	0.978839	0.358069	1	1
335	7	50947321	TTAxATT	T	C	[('HT6W37', ': ', array([ 0, 52, 0, 0]), ' ', array([ 0., 1., 0., 0.]), ' ', array([ 0., 1., 0., 0.])), ('HT6W45', ': ', array([ 0, 45, 0, 0]), ' ', array([ 0., 1., 0., 0.]), ' ', array([ 0., 1., 0., 0.])), ('HT6W47', ': ', array([ 0, 61, 0, 1]), ' ', array([ 0. , 0.98387097, 0. , 0.01612903]), ' ', array([ 0., 1., 0., 0.])), ('HT6W48', ': ', array([ 0, 70, 0, 0]), ' ', array([ 0., 1., 0., 0.]), …	10110010	0.99591	0.35889	1	1
336	7	51583548	AGAxATT	A	C	[('HT6W37', ': ', array([71, 0, 0, 0]), ' ', array([ 1., 0., 0., 0.]), ' ', array([ 1., 0., 0., 0.])), ('HT6W45', ': ', array([63, 0, 0, 0]), ' ', array([ 1., 0., 0., 0.]), ' ', array([ 1., 0., 0., 0.])), ('HT6W47', ': ', array([58, 1, 1, 1]), ' ', array([ 0.95081967, 0.01639344, 0.01639344, 0.01639344]), ' ', array([ 1., 0., 0., 0.])), ('HT6W48', ': ', array([66, 0, 0, 1]), ' ', array([ 0.985074…	10110010	0.982313	0.383643	1	1
337	7	53238253	ATTxAAT	A	C	[('HT6W37', ': ', array([40, 0, 0, 0]), ' ', array([ 1., 0., 0., 0.]), ' ', array([ 1., 0., 0., 0.])), ('HT6W45', ': ', array([51, 0, 0, 0]), ' ', array([ 1., 0., 0., 0.]), ' ', array([ 1., 0., 0., 0.])), ('HT6W47', ': ', array([71, 0, 1, 0]), ' ', array([ 0.98611111, 0. , 0.01388889, 0. ]), ' ', array([ 1., 0., 0., 0.])), ('HT6W48', ': ', array([63, 0, 0, 0]), ' ', array([ 1., 0., 0., 0.]), ' ',…	100010	0.998457	0.31734	1	1
338	7	67328859	GCCxCCA	A	C	[('HT6W37', ': ', array([53, 0, 0, 1]), ' ', array([ 0.98148148, 0. , 0. , 0.01851852]), ' ', array([ 1., 0., 0., 0.])), ('HT6W45', ': ', array([57, 0, 1, 1]), ' ', array([ 0.96610169, 0. , 0.01694915, 0.01694915]), ' ', array([ 1., 0., 0., 0.])), ('HT6W47', ': ', array([70, 0, 2, 0]), ' ', array([ 0.97222222, 0. , 0.02777778, 0. ]), ' ', array([ 1., 0., 0., 0.])), ('HT6W48', ': ', array([48, 0, …	10110010	0.975788	0.320578	1	1
339	7	68175184	AAGxCAA	C	T	[('HT6W37', ': ', array([ 0, 0, 41, 0]), ' ', array([ 0., 0., 1., 0.]), ' ', array([ 0., 0., 1., 0.])), ('HT6W45', ': ', array([ 0, 0, 58, 0]), ' ', array([ 0., 0., 1., 0.]), ' ', array([ 0., 0., 1., 0.])), ('HT6W47', ': ', array([ 0, 0, 45, 0]), ' ', array([ 0., 0., 1., 0.]), ' ', array([ 0., 0., 1., 0.])), ('HT6W48', ': ', array([ 0, 0, 65, 0]), ' ', array([ 0., 0., 1., 0.]), ' ', array([ 0., 0…	10110010	0.995942	0.310543	1	1
340	7	68501314	AGTxAGA	A	C	[('HT6W37', ': ', array([44, 0, 0, 0]), ' ', array([ 1., 0., 0., 0.]), ' ', array([ 1., 0., 0., 0.])), ('HT6W45', ': ', array([55, 0, 0, 0]), ' ', array([ 1., 0., 0., 0.]), ' ', array([ 1., 0., 0., 0.])), ('HT6W47', ': ', array([60, 0, 0, 0]), ' ', array([ 1., 0., 0., 0.]), ' ', array([ 1., 0., 0., 0.])), ('HT6W48', ': ', array([66, 0, 0, 0]), ' ', array([ 1., 0., 0., 0.]), ' ', array([ 1., 0., 0…	10110010	0.99466	0.375759	1	1
341	7	69472689	GTGxGCA	C	T	[('HT6W37', ': ', array([ 0, 0, 60, 0]), ' ', array([ 0., 0., 1., 0.]), ' ', array([ 0., 0., 1., 0.])), ('HT6W45', ': ', array([ 1, 0, 53, 0]), ' ', array([ 0.01851852, 0. , 0.98148148, 0. ]), ' ', array([ 0., 0., 1., 0.])), ('HT6W47', ': ', array([ 0, 0, 46, 0]), ' ', array([ 0., 0., 1., 0.]), ' ', array([ 0., 0., 1., 0.])), ('HT6W48', ': ', array([ 0, 0, 61, 0]), ' ', array([ 0., 0., 1., 0.]), …	100010	0.996683	0.328556	1	1
342	7	82114848	TAAxACC	A	C	[('HT6W37', ': ', array([40, 0, 0, 0]), ' ', array([ 1., 0., 0., 0.]), ' ', array([ 1., 0., 0., 0.])), ('HT6W45', ': ', array([35, 0, 1, 0]), ' ', array([ 0.97222222, 0. , 0.02777778, 0. ]), ' ', array([ 1., 0., 0., 0.])), ('HT6W47', ': ', array([44, 0, 0, 0]), ' ', array([ 1., 0., 0., 0.]), ' ', array([ 1., 0., 0., 0.])), ('HT6W48', ': ', array([52, 0, 0, 0]), ' ', array([ 1., 0., 0., 0.]), ' ',…	10110010	0.996599	0.483544	1	1
343	7	83869675	AGAxATT	A	C	[('HT6W37', ': ', array([38, 0, 0, 0]), ' ', array([ 1., 0., 0., 0.]), ' ', array([ 1., 0., 0., 0.])), ('HT6W45', ': ', array([27, 0, 0, 0]), ' ', array([ 1., 0., 0., 0.]), ' ', array([ 1., 0., 0., 0.])), ('HT6W47', ': ', array([55, 0, 1, 0]), ' ', array([ 0.98214286, 0. , 0.01785714, 0. ]), ' ', array([ 1., 0., 0., 0.])), ('HT6W48', ': ', array([47, 0, 1, 0]), ' ', array([ 0.97916667, 0. , 0.020…	10110010	0.987038	0.509398	1	1
344	7	87907356	ATGxATA	T	C	[('HT6W37', ': ', array([ 0, 32, 0, 0]), ' ', array([ 0., 1., 0., 0.]), ' ', array([ 0., 1., 0., 0.])), ('HT6W45', ': ', array([ 0, 29, 0, 0]), ' ', array([ 0., 1., 0., 0.]), ' ', array([ 0., 1., 0., 0.])), ('HT6W47', ': ', array([ 0, 40, 0, 0]), ' ', array([ 0., 1., 0., 0.]), ' ', array([ 0., 1., 0., 0.])), ('HT6W48', ': ', array([ 0, 43, 0, 1]), ' ', array([ 0. , 0.97727273, 0. , 0.02272727]), …	10110010	0.983766	0.501684	1	1
345	7	93250179	AATxCAT	A	G	[('HT6W37', ': ', array([34, 0, 1, 0]), ' ', array([ 0.97142857, 0. , 0.02857143, 0. ]), ' ', array([ 1., 0., 0., 0.])), ('HT6W45', ': ', array([38, 0, 0, 0]), ' ', array([ 1., 0., 0., 0.]), ' ', array([ 1., 0., 0., 0.])), ('HT6W47', ': ', array([47, 0, 0, 0]), ' ', array([ 1., 0., 0., 0.]), ' ', array([ 1., 0., 0., 0.])), ('HT6W48', ': ', array([47, 0, 0, 0]), ' ', array([ 1., 0., 0., 0.]), ' ',…	10110010	0.9891	0.514702	1	1
346	7	96498227	AGAxCAT	A	G	[('HT6W37', ': ', array([46, 0, 0, 1]), ' ', array([ 0.9787234, 0. , 0. , 0.0212766]), ' ', array([ 1., 0., 0., 0.])), ('HT6W45', ': ', array([41, 0, 0, 0]), ' ', array([ 1., 0., 0., 0.]), ' ', array([ 1., 0., 0., 0.])), ('HT6W47', ': ', array([42, 0, 0, 0]), ' ', array([ 1., 0., 0., 0.]), ' ', array([ 1., 0., 0., 0.])), ('HT6W48', ': ', array([55, 0, 0, 0]), ' ', array([ 1., 0., 0., 0.]), ' ', a…	100010	0.997636	0.520279	1	1
347	7	98459220	AGTxCCA	C	A	[('HT6W37', ': ', array([ 0, 0, 46, 0]), ' ', array([ 0., 0., 1., 0.]), ' ', array([ 0., 0., 1., 0.])), ('HT6W45', ': ', array([ 0, 0, 34, 0]), ' ', array([ 0., 0., 1., 0.]), ' ', array([ 0., 0., 1., 0.])), ('HT6W47', ': ', array([ 0, 0, 44, 0]), ' ', array([ 0., 0., 1., 0.]), ' ', array([ 0., 0., 1., 0.])), ('HT6W48', ': ', array([ 0, 0, 50, 0]), ' ', array([ 0., 0., 1., 0.]), ' ', array([ 0., 0…	10110010	1	0.544978	1	1
348	7	108451044	TTCxAAC	A	G	[('HT6W37', ': ', array([45, 0, 0, 0]), ' ', array([ 1., 0., 0., 0.]), ' ', array([ 1., 0., 0., 0.])), ('HT6W45', ': ', array([41, 0, 1, 0]), ' ', array([ 0.97619048, 0. , 0.02380952, 0. ]), ' ', array([ 1., 0., 0., 0.])), ('HT6W47', ': ', array([42, 0, 0, 0]), ' ', array([ 1., 0., 0., 0.]), ' ', array([ 1., 0., 0., 0.])), ('HT6W48', ': ', array([36, 0, 0, 0]), ' ', array([ 1., 0., 0., 0.]), ' ',…	100010	0.995414	0.449608	1	1
349	7	110589803	ATAxATT	T	G	[('HT6W37', ': ', array([ 1, 29, 0, 0]), ' ', array([ 0.03333333, 0.96666667, 0. , 0. ]), ' ', array([ 0., 1., 0., 0.])), ('HT6W45', ': ', array([ 0, 25, 0, 0]), ' ', array([ 0., 1., 0., 0.]), ' ', array([ 0., 1., 0., 0.])), ('HT6W47', ': ', array([ 0, 45, 0, 1]), ' ', array([ 0. , 0.97826087, 0. , 0.02173913]), ' ', array([ 0., 1., 0., 0.])), ('HT6W48', ': ', array([ 0, 37, 0, 0]), ' ', array([ …	100010	0.978146	0.418084	1	1
350	7	119329975	TTGxTAG	C	T	[('HT6W37', ': ', array([ 0, 0, 26, 0]), ' ', array([ 0., 0., 1., 0.]), ' ', array([ 0., 0., 1., 0.])), ('HT6W45', ': ', array([ 0, 0, 33, 0]), ' ', array([ 0., 0., 1., 0.]), ' ', array([ 0., 0., 1., 0.])), ('HT6W47', ': ', array([ 0, 0, 43, 0]), ' ', array([ 0., 0., 1., 0.]), ' ', array([ 0., 0., 1., 0.])), ('HT6W48', ': ', array([ 0, 1, 35, 1]), ' ', array([ 0. , 0.02702703, 0.94594595, 0.02702…	100010	0.964234	0.551797	1	1
351	7	121778184	TTTxTTC	C	A	[('HT6W37', ': ', array([ 0, 0, 38, 0]), ' ', array([ 0., 0., 1., 0.]), ' ', array([ 0., 0., 1., 0.])), ('HT6W45', ': ', array([ 0, 0, 42, 0]), ' ', array([ 0., 0., 1., 0.]), ' ', array([ 0., 0., 1., 0.])), ('HT6W47', ': ', array([ 0, 0, 46, 0]), ' ', array([ 0., 0., 1., 0.]), ' ', array([ 0., 0., 1., 0.])), ('HT6W48', ': ', array([ 0, 0, 46, 0]), ' ', array([ 0., 0., 1., 0.]), ' ', array([ 0., 0…	100010	0.997475	0.549865	1	1
352	7	136659494	TCTxTGT	C	T	[('HT6W37', ': ', array([ 0, 0, 34, 0]), ' ', array([ 0., 0., 1., 0.]), ' ', array([ 0., 0., 1., 0.])), ('HT6W45', ': ', array([ 0, 0, 26, 0]), ' ', array([ 0., 0., 1., 0.]), ' ', array([ 0., 0., 1., 0.])), ('HT6W47', ': ', array([ 0, 0, 39, 0]), ' ', array([ 0., 0., 1., 0.]), ' ', array([ 0., 0., 1., 0.])), ('HT6W48', ': ', array([ 0, 0, 38, 0]), ' ', array([ 0., 0., 1., 0.]), ' ', array([ 0., 0…	10110010	0.996032	0.520339	1	1
353	7	146171853	AATxAAA	A	G	[('HT6W37', ': ', array([45, 0, 0, 0]), ' ', array([ 1., 0., 0., 0.]), ' ', array([ 1., 0., 0., 0.])), ('HT6W45', ': ', array([41, 0, 0, 0]), ' ', array([ 1., 0., 0., 0.]), ' ', array([ 1., 0., 0., 0.])), ('HT6W47', ': ', array([38, 0, 1, 1]), ' ', array([ 0.95 , 0. , 0.025, 0.025]), ' ', array([ 1., 0., 0., 0.])), ('HT6W48', ': ', array([42, 0, 0, 0]), ' ', array([ 1., 0., 0., 0.]), ' ', array([…	100010	0.99186	0.46	1	1
354	7	146288433	GAAxAAA	G	A	[('HT6W37', ': ', array([ 0, 1, 0, 33]), ' ', array([ 0. , 0.02941176, 0. , 0.97058824]), ' ', array([ 0., 0., 0., 1.])), ('HT6W45', ': ', array([ 0, 0, 0, 33]), ' ', array([ 0., 0., 0., 1.]), ' ', array([ 0., 0., 0., 1.])), ('HT6W47', ': ', array([ 0, 0, 0, 41]), ' ', array([ 0., 0., 0., 1.]), ' ', array([ 0., 0., 0., 1.])), ('HT6W48', ': ', array([ 0, 0, 0, 38]), ' ', array([ 0., 0., 0., 1.]), …	10110010	0.995798	0.53579	1	1
355	7	149955945	AGAxTAT	C	A	[('HT6W37', ': ', array([ 0, 1, 42, 0]), ' ', array([ 0. , 0.02325581, 0.97674419, 0. ]), ' ', array([ 0., 0., 1., 0.])), ('HT6W45', ': ', array([ 1, 0, 52, 0]), ' ', array([ 0.01886792, 0. , 0.98113208, 0. ]), ' ', array([ 0., 0., 1., 0.])), ('HT6W47', ': ', array([ 0, 0, 44, 0]), ' ', array([ 0., 0., 1., 0.]), ' ', array([ 0., 0., 1., 0.])), ('HT6W48', ': ', array([ 0, 0, 62, 1]), ' ', array([ …	100010	0.992875	0.348493	1	1
356	7	150830922	GGTxCCT	A	G	[('HT6W37', ': ', array([45, 0, 0, 0]), ' ', array([ 1., 0., 0., 0.]), ' ', array([ 1., 0., 0., 0.])), ('HT6W45', ': ', array([41, 0, 0, 0]), ' ', array([ 1., 0., 0., 0.]), ' ', array([ 1., 0., 0., 0.])), ('HT6W47', ': ', array([35, 0, 0, 0]), ' ', array([ 1., 0., 0., 0.]), ' ', array([ 1., 0., 0., 0.])), ('HT6W48', ': ', array([40, 0, 0, 0]), ' ', array([ 1., 0., 0., 0.]), ' ', array([ 1., 0., 0…	100010	0.997821	0.533019	1	1
357	7	153585945	ACAxAAG	G	T	[('HT6W37', ': ', array([ 0, 0, 0, 40]), ' ', array([ 0., 0., 0., 1.]), ' ', array([ 0., 0., 0., 1.])), ('HT6W45', ': ', array([ 0, 0, 0, 37]), ' ', array([ 0., 0., 0., 1.]), ' ', array([ 0., 0., 0., 1.])), ('HT6W47', ': ', array([ 0, 0, 0, 41]), ' ', array([ 0., 0., 0., 1.]), ' ', array([ 0., 0., 0., 1.])), ('HT6W48', ': ', array([ 0, 0, 0, 44]), ' ', array([ 0., 0., 0., 1.]), ' ', array([ 0., 0…	10110010	1	0.410877	1	1
358	7	154587457	AAAxTGT	T	G	[('HT6W37', ': ', array([ 0, 50, 0, 0]), ' ', array([ 0., 1., 0., 0.]), ' ', array([ 0., 1., 0., 0.])), ('HT6W45', ': ', array([ 0, 28, 1, 0]), ' ', array([ 0. , 0.96551724, 0.03448276, 0. ]), ' ', array([ 0., 1., 0., 0.])), ('HT6W47', ': ', array([ 0, 41, 0, 0]), ' ', array([ 0., 1., 0., 0.]), ' ', array([ 0., 1., 0., 0.])), ('HT6W48', ': ', array([ 0, 39, 2, 2]), ' ', array([ 0. , 0.90697674, 0…	100010	0.980791	0.473505	1	1
359	7	154992596	GATxGCA	C	T	[('HT6W37', ': ', array([ 1, 0, 65, 0]), ' ', array([ 0.01515152, 0. , 0.98484848, 0. ]), ' ', array([ 0., 0., 1., 0.])), ('HT6W45', ': ', array([ 0, 0, 33, 0]), ' ', array([ 0., 0., 1., 0.]), ' ', array([ 0., 0., 1., 0.])), ('HT6W47', ': ', array([ 2, 0, 46, 0]), ' ', array([ 0.04166667, 0. , 0.95833333, 0. ]), ' ', array([ 0., 0., 1., 0.])), ('HT6W48', ': ', array([ 1, 0, 50, 0]), ' ', array([ …	100010	0.980796	0.47381	1	1
360	8	5922762	TTAxTTG	C	T	[('HT6W37', ': ', array([ 0, 0, 43, 0]), ' ', array([ 0., 0., 1., 0.]), ' ', array([ 0., 0., 1., 0.])), ('HT6W45', ': ', array([ 0, 0, 36, 0]), ' ', array([ 0., 0., 1., 0.]), ' ', array([ 0., 0., 1., 0.])), ('HT6W47', ': ', array([ 0, 0, 41, 0]), ' ', array([ 0., 0., 1., 0.]), ' ', array([ 0., 0., 1., 0.])), ('HT6W48', ': ', array([ 0, 0, 54, 0]), ' ', array([ 0., 0., 1., 0.]), ' ', array([ 0., 0…	100010	0.996528	0.561429	1	1
361	8	15016321	AAAxATC	G	T	[('HT6W37', ': ', array([ 0, 0, 0, 28]), ' ', array([ 0., 0., 0., 1.]), ' ', array([ 0., 0., 0., 1.])), ('HT6W45', ': ', array([ 0, 0, 0, 26]), ' ', array([ 0., 0., 0., 1.]), ' ', array([ 0., 0., 0., 1.])), ('HT6W47', ': ', array([ 0, 0, 2, 39]), ' ', array([ 0. , 0. , 0.04878049, 0.95121951]), ' ', array([ 0., 0., 0., 1.])), ('HT6W48', ': ', array([ 0, 0, 1, 35]), ' ', array([ 0. , 0. , 0.027777…	100010	0.988491	0.5	1	1
362	8	20891235	CAGxGAG	A	C	[('HT6W37', ': ', array([46, 0, 1, 0]), ' ', array([ 0.9787234, 0. , 0.0212766, 0. ]), ' ', array([ 1., 0., 0., 0.])), ('HT6W45', ': ', array([26, 0, 0, 0]), ' ', array([ 1., 0., 0., 0.]), ' ', array([ 1., 0., 0., 0.])), ('HT6W47', ': ', array([41, 0, 0, 0]), ' ', array([ 1., 0., 0., 0.]), ' ', array([ 1., 0., 0., 0.])), ('HT6W48', ': ', array([48, 0, 0, 0]), ' ', array([ 1., 0., 0., 0.]), ' ', a…	10110010	0.985242	0.432573	1	1
363	8	26758945	AATxGCA	C	T	[('HT6W37', ': ', array([ 0, 0, 25, 0]), ' ', array([ 0., 0., 1., 0.]), ' ', array([ 0., 0., 1., 0.])), ('HT6W45', ': ', array([ 0, 0, 31, 0]), ' ', array([ 0., 0., 1., 0.]), ' ', array([ 0., 0., 1., 0.])), ('HT6W47', ': ', array([ 0, 0, 51, 0]), ' ', array([ 0., 0., 1., 0.]), ' ', array([ 0., 0., 1., 0.])), ('HT6W48', ': ', array([ 1, 0, 36, 0]), ' ', array([ 0.02702703, 0. , 0.97297297, 0. ]), …	100010	0.990587	0.408217	1	1
364	8	31664076	GCAxTTT	A	G	[('HT6W37', ': ', array([35, 0, 0, 0]), ' ', array([ 1., 0., 0., 0.]), ' ', array([ 1., 0., 0., 0.])), ('HT6W45', ': ', array([44, 0, 0, 0]), ' ', array([ 1., 0., 0., 0.]), ' ', array([ 1., 0., 0., 0.])), ('HT6W47', ': ', array([30, 0, 0, 0]), ' ', array([ 1., 0., 0., 0.]), ' ', array([ 1., 0., 0., 0.])), ('HT6W48', ': ', array([45, 0, 0, 0]), ' ', array([ 1., 0., 0., 0.]), ' ', array([ 1., 0., 0…	100010	1	0.48079	1	1
365	8	32527736	TGGxTCT	C	T	[('HT6W37', ': ', array([ 0, 0, 45, 0]), ' ', array([ 0., 0., 1., 0.]), ' ', array([ 0., 0., 1., 0.])), ('HT6W45', ': ', array([ 0, 1, 39, 0]), ' ', array([ 0. , 0.025, 0.975, 0. ]), ' ', array([ 0., 0., 1., 0.])), ('HT6W47', ': ', array([ 0, 0, 47, 2]), ' ', array([ 0. , 0. , 0.95918367, 0.04081633]), ' ', array([ 0., 0., 1., 0.])), ('HT6W48', ': ', array([ 0, 0, 61, 0]), ' ', array([ 0., 0., 1.…	100010	0.98492	0.48315	1	1
366	8	34360218	TCCxGTC	T	C	[('HT6W37', ': ', array([ 0, 15, 0, 0]), ' ', array([ 0., 1., 0., 0.]), ' ', array([ 0., 1., 0., 0.])), ('HT6W45', ': ', array([ 0, 12, 0, 0]), ' ', array([ 0., 1., 0., 0.]), ' ', array([ 0., 1., 0., 0.])), ('HT6W47', ': ', array([ 0, 24, 0, 0]), ' ', array([ 0., 1., 0., 0.]), ' ', array([ 0., 1., 0., 0.])), ('HT6W48', ': ', array([ 0, 19, 0, 0]), ' ', array([ 0., 1., 0., 0.]), ' ', array([ 0., 1…	10110010	1	0.972705	1	1
367	8	35094928	GGTxTTT	C	A	[('HT6W37', ': ', array([ 0, 0, 35, 0]), ' ', array([ 0., 0., 1., 0.]), ' ', array([ 0., 0., 1., 0.])), ('HT6W45', ': ', array([ 0, 0, 33, 0]), ' ', array([ 0., 0., 1., 0.]), ' ', array([ 0., 0., 1., 0.])), ('HT6W47', ': ', array([ 0, 0, 47, 0]), ' ', array([ 0., 0., 1., 0.]), ' ', array([ 0., 0., 1., 0.])), ('HT6W48', ': ', array([ 0, 0, 24, 0]), ' ', array([ 0., 0., 1., 0.]), ' ', array([ 0., 0…	100010	0.991477	0.3625	0.999815	1
368	8	36824037	AAGxGAA	A	G	[('HT6W37', ': ', array([35, 0, 0, 0]), ' ', array([ 1., 0., 0., 0.]), ' ', array([ 1., 0., 0., 0.])), ('HT6W45', ': ', array([41, 0, 0, 0]), ' ', array([ 1., 0., 0., 0.]), ' ', array([ 1., 0., 0., 0.])), ('HT6W47', ': ', array([39, 0, 0, 0]), ' ', array([ 1., 0., 0., 0.]), ' ', array([ 1., 0., 0., 0.])), ('HT6W48', ': ', array([36, 0, 0, 0]), ' ', array([ 1., 0., 0., 0.]), ' ', array([ 1., 0., 0…	100010	0.993056	0.461538	1	1
369	8	47960940	AATxTAG	C	A	[('HT6W37', ': ', array([ 0, 0, 23, 0]), ' ', array([ 0., 0., 1., 0.]), ' ', array([ 0., 0., 1., 0.])), ('HT6W45', ': ', array([ 0, 0, 29, 0]), ' ', array([ 0., 0., 1., 0.]), ' ', array([ 0., 0., 1., 0.])), ('HT6W47', ': ', array([ 0, 0, 36, 0]), ' ', array([ 0., 0., 1., 0.]), ' ', array([ 0., 0., 1., 0.])), ('HT6W48', ': ', array([ 0, 0, 33, 0]), ' ', array([ 0., 0., 1., 0.]), ' ', array([ 0., 0…	100010	0.996914	0.456221	1	1
370	8	52846005	CTAxGCA	T	G	[('HT6W37', ': ', array([ 0, 32, 0, 0]), ' ', array([ 0., 1., 0., 0.]), ' ', array([ 0., 1., 0., 0.])), ('HT6W45', ': ', array([ 0, 40, 0, 0]), ' ', array([ 0., 1., 0., 0.]), ' ', array([ 0., 1., 0., 0.])), ('HT6W47', ': ', array([ 0, 35, 0, 0]), ' ', array([ 0., 1., 0., 0.]), ' ', array([ 0., 1., 0., 0.])), ('HT6W48', ': ', array([ 0, 40, 1, 0]), ' ', array([ 0. , 0.97560976, 0.02439024, 0. ]), …	100010	0.992254	0.556757	1	1
371	8	56100405	AAAxATG	C	T	[('HT6W37', ': ', array([ 0, 0, 38, 1]), ' ', array([ 0. , 0. , 0.97435897, 0.02564103]), ' ', array([ 0., 0., 1., 0.])), ('HT6W45', ': ', array([ 0, 0, 40, 0]), ' ', array([ 0., 0., 1., 0.]), ' ', array([ 0., 0., 1., 0.])), ('HT6W47', ': ', array([ 0, 1, 53, 0]), ' ', array([ 0. , 0.01851852, 0.98148148, 0. ]), ' ', array([ 0., 0., 1., 0.])), ('HT6W48', ': ', array([ 1, 0, 39, 0]), ' ', array([ …	100010	0.992316	0.47076	1	1
372	8	58213388	GTGxTGT	T	C	[('HT6W37', ': ', array([ 0, 45, 0, 0]), ' ', array([ 0., 1., 0., 0.]), ' ', array([ 0., 1., 0., 0.])), ('HT6W45', ': ', array([ 0, 14, 0, 0]), ' ', array([ 0., 1., 0., 0.]), ' ', array([ 0., 1., 0., 0.])), ('HT6W47', ': ', array([ 0, 51, 0, 1]), ' ', array([ 0. , 0.98076923, 0. , 0.01923077]), ' ', array([ 0., 1., 0., 0.])), ('HT6W48', ': ', array([ 0, 35, 0, 0]), ' ', array([ 0., 1., 0., 0.]), …	10110010	0.991855	0.545715	1	1
373	8	60115941	TTTxTTC	C	A	[('HT6W37', ': ', array([ 0, 0, 33, 0]), ' ', array([ 0., 0., 1., 0.]), ' ', array([ 0., 0., 1., 0.])), ('HT6W45', ': ', array([ 0, 0, 35, 0]), ' ', array([ 0., 0., 1., 0.]), ' ', array([ 0., 0., 1., 0.])), ('HT6W47', ': ', array([ 0, 1, 38, 0]), ' ', array([ 0. , 0.02564103, 0.97435897, 0. ]), ' ', array([ 0., 0., 1., 0.])), ('HT6W48', ': ', array([ 0, 0, 50, 1]), ' ', array([ 0. , 0. , 0.980392…	100010	0.985135	0.522391	1	1
374	8	69036155	AGGxCAG	C	T	[('HT6W37', ': ', array([ 0, 0, 42, 1]), ' ', array([ 0. , 0. , 0.97674419, 0.02325581]), ' ', array([ 0., 0., 1., 0.])), ('HT6W45', ': ', array([ 0, 0, 45, 0]), ' ', array([ 0., 0., 1., 0.]), ' ', array([ 0., 0., 1., 0.])), ('HT6W47', ': ', array([ 0, 0, 39, 0]), ' ', array([ 0., 0., 1., 0.]), ' ', array([ 0., 0., 1., 0.])), ('HT6W48', ': ', array([ 0, 0, 46, 0]), ' ', array([ 0., 0., 1., 0.]), …	100010	0.997416	0.525	1	1
375	8	76117747	GTAxGCT	C	G	[('HT6W37', ': ', array([ 0, 0, 25, 0]), ' ', array([ 0., 0., 1., 0.]), ' ', array([ 0., 0., 1., 0.])), ('HT6W45', ': ', array([ 1, 0, 35, 0]), ' ', array([ 0.02777778, 0. , 0.97222222, 0. ]), ' ', array([ 0., 0., 1., 0.])), ('HT6W47', ': ', array([ 0, 0, 40, 0]), ' ', array([ 0., 0., 1., 0.]), ' ', array([ 0., 0., 1., 0.])), ('HT6W48', ': ', array([ 0, 0, 47, 0]), ' ', array([ 0., 0., 1., 0.]), …	100010	0.997354	0.365836	1	1
376	8	79187760	ATTxTCG	C	A	[('HT6W37', ': ', array([ 0, 0, 33, 0]), ' ', array([ 0., 0., 1., 0.]), ' ', array([ 0., 0., 1., 0.])), ('HT6W45', ': ', array([ 1, 0, 39, 0]), ' ', array([ 0.025, 0. , 0.975, 0. ]), ' ', array([ 0., 0., 1., 0.])), ('HT6W47', ': ', array([ 0, 0, 43, 0]), ' ', array([ 0., 0., 1., 0.]), ' ', array([ 0., 0., 1., 0.])), ('HT6W48', ': ', array([ 0, 0, 38, 0]), ' ', array([ 0., 0., 1., 0.]), ' ', array…	100010	0.997416	0.447773	1	1
377	8	82484469	TTCxCTT	A	C	[('HT6W37', ': ', array([47, 0, 1, 0]), ' ', array([ 0.97916667, 0. , 0.02083333, 0. ]), ' ', array([ 1., 0., 0., 0.])), ('HT6W45', ': ', array([46, 0, 0, 0]), ' ', array([ 1., 0., 0., 0.]), ' ', array([ 1., 0., 0., 0.])), ('HT6W47', ': ', array([51, 0, 0, 0]), ' ', array([ 1., 0., 0., 0.]), ' ', array([ 1., 0., 0., 0.])), ('HT6W48', ': ', array([42, 0, 1, 0]), ' ', array([ 0.97674419, 0. , 0.023…	10110010	0.987388	0.45748	1	1
378	8	104504194	AATxTTT	T	G	[('HT6W37', ': ', array([ 0, 40, 0, 0]), ' ', array([ 0., 1., 0., 0.]), ' ', array([ 0., 1., 0., 0.])), ('HT6W45', ': ', array([ 0, 30, 0, 0]), ' ', array([ 0., 1., 0., 0.]), ' ', array([ 0., 1., 0., 0.])), ('HT6W47', ': ', array([ 0, 46, 0, 1]), ' ', array([ 0. , 0.9787234, 0. , 0.0212766]), ' ', array([ 0., 1., 0., 0.])), ('HT6W48', ': ', array([ 0, 42, 0, 0]), ' ', array([ 0., 1., 0., 0.]), ' …	100010	0.988203	0.463243	1	1
379	8	113681792	AAAxGAT	G	T	[('HT6W37', ': ', array([ 0, 0, 0, 35]), ' ', array([ 0., 0., 0., 1.]), ' ', array([ 0., 0., 0., 1.])), ('HT6W45', ': ', array([ 0, 0, 0, 44]), ' ', array([ 0., 0., 0., 1.]), ' ', array([ 0., 0., 0., 1.])), ('HT6W47', ': ', array([ 2, 1, 0, 33]), ' ', array([ 0.05555556, 0.02777778, 0. , 0.91666667]), ' ', array([ 0., 0., 0., 1.])), ('HT6W48', ': ', array([ 0, 0, 0, 39]), ' ', array([ 0., 0., 0.,…	10110010	0.982026	0.545629	1	1
380	8	115960111	TTTxATT	A	G	[('HT6W37', ': ', array([42, 0, 0, 0]), ' ', array([ 1., 0., 0., 0.]), ' ', array([ 1., 0., 0., 0.])), ('HT6W45', ': ', array([26, 0, 0, 0]), ' ', array([ 1., 0., 0., 0.]), ' ', array([ 1., 0., 0., 0.])), ('HT6W47', ': ', array([48, 1, 0, 0]), ' ', array([ 0.97959184, 0.02040816, 0. , 0. ]), ' ', array([ 1., 0., 0., 0.])), ('HT6W48', ': ', array([41, 1, 1, 0]), ' ', array([ 0.95348837, 0.02325581…	10110010	0.983947	0.468498	1	1
381	8	126724669	ACAxAGT	G	T	[('HT6W37', ': ', array([ 0, 0, 0, 37]), ' ', array([ 0., 0., 0., 1.]), ' ', array([ 0., 0., 0., 1.])), ('HT6W45', ': ', array([ 0, 0, 0, 54]), ' ', array([ 0., 0., 0., 1.]), ' ', array([ 0., 0., 0., 1.])), ('HT6W47', ': ', array([ 0, 0, 0, 52]), ' ', array([ 0., 0., 0., 1.]), ' ', array([ 0., 0., 0., 1.])), ('HT6W48', ': ', array([ 0, 0, 0, 43]), ' ', array([ 0., 0., 0., 1.]), ' ', array([ 0., 0…	10110010	1	0.411295	1	1
382	8	130174401	GACxTCA	T	G	[('HT6W37', ': ', array([ 0, 38, 0, 0]), ' ', array([ 0., 1., 0., 0.]), ' ', array([ 0., 1., 0., 0.])), ('HT6W45', ': ', array([ 0, 29, 0, 0]), ' ', array([ 0., 1., 0., 0.]), ' ', array([ 0., 1., 0., 0.])), ('HT6W47', ': ', array([ 0, 48, 0, 0]), ' ', array([ 0., 1., 0., 0.]), ' ', array([ 0., 1., 0., 0.])), ('HT6W48', ': ', array([ 0, 51, 0, 0]), ' ', array([ 0., 1., 0., 0.]), ' ', array([ 0., 1…	100010	0.997076	0.484013	1	1
383	8	131779886	TGCxAAT	A	G	[('HT6W37', ': ', array([48, 0, 0, 0]), ' ', array([ 1., 0., 0., 0.]), ' ', array([ 1., 0., 0., 0.])), ('HT6W45', ': ', array([32, 0, 0, 0]), ' ', array([ 1., 0., 0., 0.]), ' ', array([ 1., 0., 0., 0.])), ('HT6W47', ': ', array([54, 0, 0, 0]), ' ', array([ 1., 0., 0., 0.]), ' ', array([ 1., 0., 0., 0.])), ('HT6W48', ': ', array([39, 0, 0, 0]), ' ', array([ 1., 0., 0., 0.]), ' ', array([ 1., 0., 0…	10110010	0.996337	0.498248	1	1
384	8	138686438	AATxTCA	C	A	[('HT6W37', ': ', array([ 0, 0, 26, 0]), ' ', array([ 0., 0., 1., 0.]), ' ', array([ 0., 0., 1., 0.])), ('HT6W45', ': ', array([ 0, 0, 21, 0]), ' ', array([ 0., 0., 1., 0.]), ' ', array([ 0., 0., 1., 0.])), ('HT6W47', ': ', array([ 0, 0, 38, 0]), ' ', array([ 0., 0., 1., 0.]), ' ', array([ 0., 0., 1., 0.])), ('HT6W48', ': ', array([ 0, 0, 48, 0]), ' ', array([ 0., 0., 1., 0.]), ' ', array([ 0., 0…	100010	0.994302	0.526757	1	1
385	8	138936910	CTCxGCT	G	A	[('HT6W37', ': ', array([ 0, 0, 1, 27]), ' ', array([ 0. , 0. , 0.03571429, 0.96428571]), ' ', array([ 0., 0., 0., 1.])), ('HT6W45', ': ', array([ 0, 0, 1, 23]), ' ', array([ 0. , 0. , 0.04166667, 0.95833333]), ' ', array([ 0., 0., 0., 1.])), ('HT6W47', ': ', array([ 0, 0, 1, 31]), ' ', array([ 0. , 0. , 0.03125, 0.96875]), ' ', array([ 0., 0., 0., 1.])), ('HT6W48', ': ', array([ 0, 0, 0, 38]), '…	10110010	0.981776	0.393967	0.999952	1
386	8	139636518	CGTxTGG	T	C	[('HT6W37', ': ', array([ 0, 29, 0, 0]), ' ', array([ 0., 1., 0., 0.]), ' ', array([ 0., 1., 0., 0.])), ('HT6W45', ': ', array([ 0, 41, 0, 0]), ' ', array([ 0., 1., 0., 0.]), ' ', array([ 0., 1., 0., 0.])), ('HT6W47', ': ', array([ 0, 36, 0, 0]), ' ', array([ 0., 1., 0., 0.]), ' ', array([ 0., 1., 0., 0.])), ('HT6W48', ': ', array([ 0, 35, 0, 1]), ' ', array([ 0. , 0.97222222, 0. , 0.02777778]), …	100010	0.996914	0.507761	1	1
387	9	10524234	AAAxAAA	G	A	[('HT6W37', ': ', array([ 0, 0, 0, 42]), ' ', array([ 0., 0., 0., 1.]), ' ', array([ 0., 0., 0., 1.])), ('HT6W45', ': ', array([ 0, 0, 0, 38]), ' ', array([ 0., 0., 0., 1.]), ' ', array([ 0., 0., 0., 1.])), ('HT6W47', ': ', array([ 0, 1, 0, 51]), ' ', array([ 0. , 0.01923077, 0. , 0.98076923]), ' ', array([ 0., 0., 0., 1.])), ('HT6W48', ': ', array([ 0, 0, 0, 45]), ' ', array([ 0., 0., 0., 1.]), …	10110010	0.994557	0.416761	0.999999	1
388	9	23133155	TGAxGGA	G	T	[('HT6W37', ': ', array([ 0, 0, 0, 38]), ' ', array([ 0., 0., 0., 1.]), ' ', array([ 0., 0., 0., 1.])), ('HT6W45', ': ', array([ 0, 1, 0, 40]), ' ', array([ 0. , 0.02439024, 0. , 0.97560976]), ' ', array([ 0., 0., 0., 1.])), ('HT6W47', ': ', array([ 0, 0, 0, 40]), ' ', array([ 0., 0., 0., 1.]), ' ', array([ 0., 0., 0., 1.])), ('HT6W48', ': ', array([ 0, 0, 0, 32]), ' ', array([ 0., 0., 0., 1.]), …	10110010	0.996516	0.449877	1	1
389	9	25208776	TTTxGGA	A	G	[('HT6W37', ': ', array([28, 0, 0, 0]), ' ', array([ 1., 0., 0., 0.]), ' ', array([ 1., 0., 0., 0.])), ('HT6W45', ': ', array([30, 0, 1, 0]), ' ', array([ 0.96774194, 0. , 0.03225806, 0. ]), ' ', array([ 1., 0., 0., 0.])), ('HT6W47', ': ', array([48, 0, 1, 0]), ' ', array([ 0.97959184, 0. , 0.02040816, 0. ]), ' ', array([ 1., 0., 0., 0.])), ('HT6W48', ': ', array([37, 0, 0, 0]), ' ', array([ 1., …	10110010	0.997085	0.429342	1	1
390	9	29965386	TAGxTCT	T	G	[('HT6W37', ': ', array([ 0, 41, 0, 0]), ' ', array([ 0., 1., 0., 0.]), ' ', array([ 0., 1., 0., 0.])), ('HT6W45', ': ', array([ 0, 34, 0, 0]), ' ', array([ 0., 1., 0., 0.]), ' ', array([ 0., 1., 0., 0.])), ('HT6W47', ': ', array([ 0, 44, 0, 0]), ' ', array([ 0., 1., 0., 0.]), ' ', array([ 0., 1., 0., 0.])), ('HT6W48', ': ', array([ 0, 44, 0, 0]), ' ', array([ 0., 1., 0., 0.]), ' ', array([ 0., 1…	100010	1	0.385204	1	1
391	9	84515036	GTGxTTG	C	A	[('HT6W37', ': ', array([ 0, 0, 31, 0]), ' ', array([ 0., 0., 1., 0.]), ' ', array([ 0., 0., 1., 0.])), ('HT6W45', ': ', array([ 0, 0, 37, 0]), ' ', array([ 0., 0., 1., 0.]), ' ', array([ 0., 0., 1., 0.])), ('HT6W47', ': ', array([ 0, 0, 36, 0]), ' ', array([ 0., 0., 1., 0.]), ' ', array([ 0., 0., 1., 0.])), ('HT6W48', ': ', array([ 0, 0, 32, 0]), ' ', array([ 0., 0., 1., 0.]), ' ', array([ 0., 0…	100010	0.99041	0.468145	1	1
392	9	100071374	AGAxATA	C	A	[('HT6W37', ': ', array([ 0, 0, 48, 0]), ' ', array([ 0., 0., 1., 0.]), ' ', array([ 0., 0., 1., 0.])), ('HT6W45', ': ', array([ 0, 0, 35, 0]), ' ', array([ 0., 0., 1., 0.]), ' ', array([ 0., 0., 1., 0.])), ('HT6W47', ': ', array([ 0, 0, 35, 0]), ' ', array([ 0., 0., 1., 0.]), ' ', array([ 0., 0., 1., 0.])), ('HT6W48', ': ', array([ 1, 0, 47, 0]), ' ', array([ 0.02083333, 0. , 0.97916667, 0. ]), …	100010	0.997685	0.413793	1	1
393	9	102283880	AAAxGAA	G	T	[('HT6W37', ': ', array([ 0, 0, 0, 36]), ' ', array([ 0., 0., 0., 1.]), ' ', array([ 0., 0., 0., 1.])), ('HT6W45', ': ', array([ 0, 0, 0, 29]), ' ', array([ 0., 0., 0., 1.]), ' ', array([ 0., 0., 0., 1.])), ('HT6W47', ': ', array([ 0, 0, 0, 53]), ' ', array([ 0., 0., 0., 1.]), ' ', array([ 0., 0., 0., 1.])), ('HT6W48', ': ', array([ 1, 0, 0, 41]), ' ', array([ 0.02380952, 0. , 0. , 0.97619048]), …	10110010	0.990847	0.442731	1	1
394	9	104684103	ATCxAAT	A	G	[('HT6W37', ': ', array([39, 0, 0, 0]), ' ', array([ 1., 0., 0., 0.]), ' ', array([ 1., 0., 0., 0.])), ('HT6W45', ': ', array([54, 0, 0, 0]), ' ', array([ 1., 0., 0., 0.]), ' ', array([ 1., 0., 0., 0.])), ('HT6W47', ': ', array([47, 0, 0, 0]), ' ', array([ 1., 0., 0., 0.]), ' ', array([ 1., 0., 0., 0.])), ('HT6W48', ': ', array([37, 0, 2, 0]), ' ', array([ 0.94871795, 0. , 0.05128205, 0. ]), ' ',…	10110010	0.992674	0.448016	1	1
395	9	127995342	GAGxGAG	C	T	[('HT6W37', ': ', array([ 0, 0, 27, 2]), ' ', array([ 0. , 0. , 0.93103448, 0.06896552]), ' ', array([ 0., 0., 1., 0.])), ('HT6W45', ': ', array([ 0, 0, 28, 3]), ' ', array([ 0. , 0. , 0.90322581, 0.09677419]), ' ', array([ 0., 0., 1., 0.])), ('HT6W47', ': ', array([ 1, 0, 51, 0]), ' ', array([ 0.01923077, 0. , 0.98076923, 0. ]), ' ', array([ 0., 0., 1., 0.])), ('HT6W48', ': ', array([ 0, 0, 42, …	100010	0.947463	0.423668	1	1
396	10	6563660	TTAxATT	A	C	[('HT6W37', ': ', array([41, 0, 0, 0]), ' ', array([ 1., 0., 0., 0.]), ' ', array([ 1., 0., 0., 0.])), ('HT6W45', ': ', array([32, 0, 0, 0]), ' ', array([ 1., 0., 0., 0.]), ' ', array([ 1., 0., 0., 0.])), ('HT6W47', ': ', array([38, 0, 0, 0]), ' ', array([ 1., 0., 0., 0.]), ' ', array([ 1., 0., 0., 0.])), ('HT6W48', ': ', array([45, 0, 1, 0]), ' ', array([ 0.97826087, 0. , 0.02173913, 0. ]), ' ',…	10110010	0.996894	0.483052	1	1
397	10	9650761	AGCxGTT	T	C	[('HT6W37', ': ', array([ 0, 39, 0, 0]), ' ', array([ 0. , 0.975, 0. , 0. ]), ' ', array([ 0., 1., 0., 0.])), ('HT6W45', ': ', array([ 1, 36, 0, 0]), ' ', array([ 0.02702703, 0.97297297, 0. , 0. ]), ' ', array([ 0., 1., 0., 0.])), ('HT6W47', ': ', array([ 0, 33, 0, 1]), ' ', array([ 0. , 0.97058824, 0. , 0.02941176]), ' ', array([ 0., 1., 0., 0.])), ('HT6W48', ': ', array([ 0, 33, 0, 1]), ' ', ar…	10110010	0.991597	0.510322	1	1
398	10	10888962	TGTxTTT	C	A	[('HT6W37', ': ', array([ 0, 0, 37, 0]), ' ', array([ 0., 0., 1., 0.]), ' ', array([ 0., 0., 1., 0.])), ('HT6W45', ': ', array([ 0, 0, 38, 0]), ' ', array([ 0., 0., 1., 0.]), ' ', array([ 0., 0., 1., 0.])), ('HT6W47', ': ', array([ 0, 0, 43, 0]), ' ', array([ 0., 0., 1., 0.]), ' ', array([ 0., 0., 1., 0.])), ('HT6W48', ': ', array([ 1, 0, 45, 0]), ' ', array([ 0.02173913, 0. , 0.97826087, 0. ]), …	10110010	0.993648	0.429828	1	1
399	10	14144269	CTGxAAT	T	C	[('HT6W37', ': ', array([ 0, 45, 0, 0]), ' ', array([ 0., 1., 0., 0.]), ' ', array([ 0., 1., 0., 0.])), ('HT6W45', ': ', array([ 0, 38, 0, 0]), ' ', array([ 0., 1., 0., 0.]), ' ', array([ 0., 1., 0., 0.])), ('HT6W47', ': ', array([ 0, 44, 0, 0]), ' ', array([ 0., 1., 0., 0.]), ' ', array([ 0., 1., 0., 0.])), ('HT6W48', ': ', array([ 0, 49, 0, 0]), ' ', array([ 0., 1., 0., 0.]), ' ', array([ 0., 1…	100010	0.987827	0.412907	1	1
400	10	22973517	GTGxAAC	A	G	[('HT6W37', ': ', array([41, 0, 0, 0]), ' ', array([ 1., 0., 0., 0.]), ' ', array([ 1., 0., 0., 0.])), ('HT6W45', ': ', array([40, 0, 0, 0]), ' ', array([ 1., 0., 0., 0.]), ' ', array([ 1., 0., 0., 0.])), ('HT6W47', ': ', array([44, 0, 0, 0]), ' ', array([ 1., 0., 0., 0.]), ' ', array([ 1., 0., 0., 0.])), ('HT6W48', ': ', array([35, 0, 0, 0]), ' ', array([ 1., 0., 0., 0.]), ' ', array([ 1., 0., 0…	10110010	0.990148	0.500897	1	1
401	10	28038991	AGTxTGA	G	A	[('HT6W37', ': ', array([ 0, 0, 0, 41]), ' ', array([ 0., 0., 0., 1.]), ' ', array([ 0., 0., 0., 1.])), ('HT6W45', ': ', array([ 0, 0, 0, 47]), ' ', array([ 0., 0., 0., 1.]), ' ', array([ 0., 0., 0., 1.])), ('HT6W47', ': ', array([ 1, 0, 0, 45]), ' ', array([ 0.02173913, 0. , 0. , 0.97826087]), ' ', array([ 0., 0., 0., 1.])), ('HT6W48', ': ', array([ 0, 0, 0, 40]), ' ', array([ 0., 0., 0., 1.]), …	10110010	0.996894	0.483285	1	1
402	10	31854621	TATxAGT	T	C	[('HT6W37', ': ', array([ 0, 42, 0, 0]), ' ', array([ 0., 1., 0., 0.]), ' ', array([ 0., 1., 0., 0.])), ('HT6W45', ': ', array([ 0, 34, 0, 0]), ' ', array([ 0., 1., 0., 0.]), ' ', array([ 0., 1., 0., 0.])), ('HT6W47', ': ', array([ 0, 35, 0, 0]), ' ', array([ 0., 1., 0., 0.]), ' ', array([ 0., 1., 0., 0.])), ('HT6W48', ': ', array([ 0, 42, 0, 0]), ' ', array([ 0., 1., 0., 0.]), ' ', array([ 0., 1…	10110010	0.996894	0.466845	1	1
403	10	33842995	GCCxAAG	G	A	[('HT6W37', ': ', array([ 0, 0, 0, 39]), ' ', array([ 0., 0., 0., 1.]), ' ', array([ 0., 0., 0., 1.])), ('HT6W45', ': ', array([ 0, 0, 0, 43]), ' ', array([ 0., 0., 0., 1.]), ' ', array([ 0., 0., 0., 1.])), ('HT6W47', ': ', array([ 0, 0, 0, 43]), ' ', array([ 0., 0., 0., 1.]), ' ', array([ 0., 0., 0., 1.])), ('HT6W48', ': ', array([ 0, 1, 0, 42]), ' ', array([ 0. , 0.02325581, 0. , 0.97674419]), …	10110010	0.996678	0.54899	1	1
404	10	34290783	CAGxATG	C	T	[('HT6W37', ': ', array([ 0, 0, 35, 0]), ' ', array([ 0., 0., 1., 0.]), ' ', array([ 0., 0., 1., 0.])), ('HT6W45', ': ', array([ 0, 0, 38, 0]), ' ', array([ 0., 0., 1., 0.]), ' ', array([ 0., 0., 1., 0.])), ('HT6W47', ': ', array([ 0, 0, 44, 0]), ' ', array([ 0., 0., 1., 0.]), ' ', array([ 0., 0., 1., 0.])), ('HT6W48', ': ', array([ 0, 0, 44, 0]), ' ', array([ 0., 0., 1., 0.]), ' ', array([ 0., 0…	10110010	0.996032	0.514885	1	1
405	10	34745182	CCTxTTT	C	A	[('HT6W37', ': ', array([ 0, 0, 31, 0]), ' ', array([ 0., 0., 1., 0.]), ' ', array([ 0., 0., 1., 0.])), ('HT6W45', ': ', array([ 0, 0, 34, 0]), ' ', array([ 0., 0., 1., 0.]), ' ', array([ 0., 0., 1., 0.])), ('HT6W47', ': ', array([ 0, 0, 35, 0]), ' ', array([ 0., 0., 1., 0.]), ' ', array([ 0., 0., 1., 0.])), ('HT6W48', ': ', array([ 0, 0, 44, 0]), ' ', array([ 0., 0., 1., 0.]), ' ', array([ 0., 0…	10110010	0.996753	0.481685	1	1
406	10	36149824	AAAxCAG	A	G	[('HT6W37', ': ', array([29, 0, 0, 0]), ' ', array([ 1., 0., 0., 0.]), ' ', array([ 1., 0., 0., 0.])), ('HT6W45', ': ', array([30, 0, 0, 0]), ' ', array([ 1., 0., 0., 0.]), ' ', array([ 1., 0., 0., 0.])), ('HT6W47', ': ', array([29, 0, 0, 0]), ' ', array([ 1., 0., 0., 0.]), ' ', array([ 1., 0., 0., 0.])), ('HT6W48', ': ', array([44, 0, 0, 0]), ' ', array([ 1., 0., 0., 0.]), ' ', array([ 1., 0., 0…	10110010	1	0.455177	1	1
407	10	37352711	TCTxCCT	T	G	[('HT6W37', ': ', array([ 0, 35, 0, 0]), ' ', array([ 0., 1., 0., 0.]), ' ', array([ 0., 1., 0., 0.])), ('HT6W45', ': ', array([ 0, 33, 0, 0]), ' ', array([ 0., 1., 0., 0.]), ' ', array([ 0., 1., 0., 0.])), ('HT6W47', ': ', array([ 0, 27, 0, 0]), ' ', array([ 0., 1., 0., 0.]), ' ', array([ 0., 1., 0., 0.])), ('HT6W48', ': ', array([ 0, 62, 0, 0]), ' ', array([ 0., 1., 0., 0.]), ' ', array([ 0., 1…	10110010	1	0.449658	1	1
408	10	42637540	AGGxATG	A	G	[('HT6W37', ': ', array([88, 0, 0, 0]), ' ', array([ 1., 0., 0., 0.]), ' ', array([ 1., 0., 0., 0.])), ('HT6W45', ': ', array([81, 0, 0, 0]), ' ', array([ 1., 0., 0., 0.]), ' ', array([ 1., 0., 0., 0.])), ('HT6W47', ': ', array([86, 0, 1, 0]), ' ', array([ 0.98850575, 0. , 0.01149425, 0. ]), ' ', array([ 1., 0., 0., 0.])), ('HT6W48', ': ', array([109, 0, 0, 0]), ' ', array([ 1., 0., 0., 0.]), ' '…	100010	0.996293	0.169805	0.999987	1
409	10	53465784	GTGxCAT	A	G	[('HT6W37', ': ', array([30, 0, 0, 0]), ' ', array([ 1., 0., 0., 0.]), ' ', array([ 1., 0., 0., 0.])), ('HT6W45', ': ', array([35, 0, 2, 0]), ' ', array([ 0.94594595, 0. , 0.05405405, 0. ]), ' ', array([ 1., 0., 0., 0.])), ('HT6W47', ': ', array([41, 0, 0, 0]), ' ', array([ 1., 0., 0., 0.]), ' ', array([ 1., 0., 0., 0.])), ('HT6W48', ': ', array([36, 0, 0, 0]), ' ', array([ 1., 0., 0., 0.]), ' ',…	10110010	1	0.539401	1	1
410	10	54038851	AATxATC	A	C	[('HT6W37', ': ', array([24, 0, 0, 1]), ' ', array([ 0.96, 0. , 0. , 0.04]), ' ', array([ 1., 0., 0., 0.])), ('HT6W45', ': ', array([30, 1, 0, 0]), ' ', array([ 0.96774194, 0.03225806, 0. , 0. ]), ' ', array([ 1., 0., 0., 0.])), ('HT6W47', ': ', array([31, 0, 0, 0]), ' ', array([ 1., 0., 0., 0.]), ' ', array([ 1., 0., 0., 0.])), ('HT6W48', ': ', array([46, 0, 0, 0]), ' ', array([ 1., 0., 0., 0.])…	10110010	0.991538	0.521145	1	1
411	10	54216274	TACxAAA	A	G	[('HT6W37', ': ', array([36, 0, 0, 0]), ' ', array([ 1., 0., 0., 0.]), ' ', array([ 1., 0., 0., 0.])), ('HT6W45', ': ', array([40, 0, 0, 0]), ' ', array([ 1., 0., 0., 0.]), ' ', array([ 1., 0., 0., 0.])), ('HT6W47', ': ', array([45, 0, 0, 0]), ' ', array([ 1., 0., 0., 0.]), ' ', array([ 1., 0., 0., 0.])), ('HT6W48', ': ', array([50, 0, 0, 1]), ' ', array([ 0.98039216, 0. , 0. , 0.01960784]), ' ',…	100010	0.997821	0.536347	1	1
412	10	54377980	ATAxAAA	A	G	[('HT6W37', ': ', array([40, 0, 0, 0]), ' ', array([ 1., 0., 0., 0.]), ' ', array([ 1., 0., 0., 0.])), ('HT6W45', ': ', array([35, 0, 0, 0]), ' ', array([ 1., 0., 0., 0.]), ' ', array([ 1., 0., 0., 0.])), ('HT6W47', ': ', array([43, 0, 0, 0]), ' ', array([ 1., 0., 0., 0.]), ' ', array([ 1., 0., 0., 0.])), ('HT6W48', ': ', array([36, 0, 0, 0]), ' ', array([ 1., 0., 0., 0.]), ' ', array([ 1., 0., 0…	100010	0.997685	0.48136	1	1
413	10	60615933	GGCxAAA	G	A	[('HT6W37', ': ', array([ 0, 0, 0, 24]), ' ', array([ 0., 0., 0., 1.]), ' ', array([ 0., 0., 0., 1.])), ('HT6W45', ': ', array([ 0, 1, 0, 29]), ' ', array([ 0. , 0.03333333, 0. , 0.96666667]), ' ', array([ 0., 0., 0., 1.])), ('HT6W47', ': ', array([ 0, 0, 0, 27]), ' ', array([ 0., 0., 0., 1.]), ' ', array([ 0., 0., 0., 1.])), ('HT6W48', ': ', array([ 0, 0, 0, 43]), ' ', array([ 0., 0., 0., 1.]), …	10110010	0.996825	0.542201	1	1
414	10	64684703	AATxTAA	T	G	[('HT6W37', ': ', array([ 0, 33, 0, 1]), ' ', array([ 0. , 0.97058824, 0. , 0.02941176]), ' ', array([ 0., 1., 0., 0.])), ('HT6W45', ': ', array([ 0, 41, 0, 1]), ' ', array([ 0. , 0.97619048, 0. , 0.02380952]), ' ', array([ 0., 1., 0., 0.])), ('HT6W47', ': ', array([ 0, 44, 0, 1]), ' ', array([ 0. , 0.97777778, 0. , 0.02222222]), ' ', array([ 0., 1., 0., 0.])), ('HT6W48', ': ', array([ 1, 41, 2, …	10110010	0.972175	0.581611	1	1
415	10	68473572	ACTxTCA	T	G	[('HT6W37', ': ', array([ 0, 45, 0, 0]), ' ', array([ 0., 1., 0., 0.]), ' ', array([ 0., 1., 0., 0.])), ('HT6W45', ': ', array([ 0, 33, 0, 0]), ' ', array([ 0., 1., 0., 0.]), ' ', array([ 0., 1., 0., 0.])), ('HT6W47', ': ', array([ 0, 39, 0, 0]), ' ', array([ 0., 1., 0., 0.]), ' ', array([ 0., 1., 0., 0.])), ('HT6W48', ': ', array([ 0, 29, 0, 0]), ' ', array([ 0., 1., 0., 0.]), ' ', array([ 0., 1…	10110010	0.993025	0.475933	1	1
416	10	68478410	TCAxTAA	T	C	[('HT6W37', ': ', array([ 0, 43, 0, 0]), ' ', array([ 0., 1., 0., 0.]), ' ', array([ 0., 1., 0., 0.])), ('HT6W45', ': ', array([ 0, 24, 0, 0]), ' ', array([ 0., 1., 0., 0.]), ' ', array([ 0., 1., 0., 0.])), ('HT6W47', ': ', array([ 0, 32, 0, 0]), ' ', array([ 0., 1., 0., 0.]), ' ', array([ 0., 1., 0., 0.])), ('HT6W48', ': ', array([ 0, 43, 0, 0]), ' ', array([ 0., 1., 0., 0.]), ' ', array([ 0., 1…	10110010	0.992696	0.446895	1	1
417	10	69803159	AATxTGT	T	G	[('HT6W37', ': ', array([ 0, 47, 0, 0]), ' ', array([ 0., 1., 0., 0.]), ' ', array([ 0., 1., 0., 0.])), ('HT6W45', ': ', array([ 1, 45, 0, 0]), ' ', array([ 0.02173913, 0.97826087, 0. , 0. ]), ' ', array([ 0., 1., 0., 0.])), ('HT6W47', ': ', array([ 0, 46, 0, 0]), ' ', array([ 0., 1., 0., 0.]), ' ', array([ 0., 1., 0., 0.])), ('HT6W48', ': ', array([ 0, 36, 0, 0]), ' ', array([ 0., 1., 0., 0.]), …	10110010	1	0.461782	1	1
418	10	73054985	GGAxCTC	T	C	[('HT6W37', ': ', array([ 0, 46, 0, 0]), ' ', array([ 0., 1., 0., 0.]), ' ', array([ 0., 1., 0., 0.])), ('HT6W45', ': ', array([ 0, 29, 1, 0]), ' ', array([ 0. , 0.96666667, 0.03333333, 0. ]), ' ', array([ 0., 1., 0., 0.])), ('HT6W47', ': ', array([ 0, 35, 0, 0]), ' ', array([ 0., 1., 0., 0.]), ' ', array([ 0., 1., 0., 0.])), ('HT6W48', ': ', array([ 0, 42, 0, 1]), ' ', array([ 0. , 0.97674419, 0…	10110010	0.976897	0.437472	1	1
419	10	78789809	ATGxTCT	C	A	[('HT6W37', ': ', array([ 0, 0, 50, 0]), ' ', array([ 0., 0., 1., 0.]), ' ', array([ 0., 0., 1., 0.])), ('HT6W45', ': ', array([ 0, 0, 32, 0]), ' ', array([ 0., 0., 1., 0.]), ' ', array([ 0., 0., 1., 0.])), ('HT6W47', ': ', array([ 0, 0, 55, 0]), ' ', array([ 0., 0., 1., 0.]), ' ', array([ 0., 0., 1., 0.])), ('HT6W48', ': ', array([ 0, 0, 44, 0]), ' ', array([ 0., 0., 1., 0.]), ' ', array([ 0., 0…	10110010	1	0.512889	1	1
420	10	79201849	GGAxACT	G	T	[('HT6W37', ': ', array([ 0, 0, 0, 24]), ' ', array([ 0., 0., 0., 1.]), ' ', array([ 0., 0., 0., 1.])), ('HT6W45', ': ', array([ 0, 0, 0, 43]), ' ', array([ 0., 0., 0., 1.]), ' ', array([ 0., 0., 0., 1.])), ('HT6W47', ': ', array([ 0, 0, 0, 33]), ' ', array([ 0., 0., 0., 1.]), ' ', array([ 0., 0., 0., 1.])), ('HT6W48', ': ', array([ 0, 0, 0, 36]), ' ', array([ 0., 0., 0., 1.]), ' ', array([ 0., 0…	10110010	1	0.424834	1	1
421	10	79881567	ATAxCAG	G	A	[('HT6W37', ': ', array([ 0, 0, 0, 39]), ' ', array([ 0., 0., 0., 1.]), ' ', array([ 0., 0., 0., 1.])), ('HT6W45', ': ', array([ 0, 0, 0, 43]), ' ', array([ 0., 0., 0., 1.]), ' ', array([ 0., 0., 0., 1.])), ('HT6W47', ': ', array([ 0, 0, 1, 44]), ' ', array([ 0. , 0. , 0.02222222, 0.97777778]), ' ', array([ 0., 0., 0., 1.])), ('HT6W48', ': ', array([ 0, 0, 1, 44]), ' ', array([ 0. , 0. , 0.022222…	10110010	0.993651	0.509312	1	1
422	10	86598213	CTTxTCA	C	A	[('HT6W37', ': ', array([ 0, 0, 43, 0]), ' ', array([ 0., 0., 1., 0.]), ' ', array([ 0., 0., 1., 0.])), ('HT6W45', ': ', array([ 0, 0, 36, 0]), ' ', array([ 0., 0., 1., 0.]), ' ', array([ 0., 0., 1., 0.])), ('HT6W47', ': ', array([ 0, 0, 48, 0]), ' ', array([ 0., 0., 1., 0.]), ' ', array([ 0., 0., 1., 0.])), ('HT6W48', ': ', array([ 0, 0, 40, 0]), ' ', array([ 0., 0., 1., 0.]), ' ', array([ 0., 0…	10110010	1	0.547478	1	1
423	10	96363603	CCTxTTT	T	G	[('HT6W37', ': ', array([ 1, 40, 0, 0]), ' ', array([ 0.02439024, 0.97560976, 0. , 0. ]), ' ', array([ 0., 1., 0., 0.])), ('HT6W45', ': ', array([ 0, 44, 0, 0]), ' ', array([ 0., 1., 0., 0.]), ' ', array([ 0., 1., 0., 0.])), ('HT6W47', ': ', array([ 0, 41, 0, 0]), ' ', array([ 0., 1., 0., 0.]), ' ', array([ 0., 1., 0., 0.])), ('HT6W48', ': ', array([ 0, 47, 0, 0]), ' ', array([ 0., 1., 0., 0.]), …	10110010	0.993659	0.497565	1	1
424	10	100195537	AAAxATG	A	C	[('HT6W37', ': ', array([40, 0, 0, 0]), ' ', array([ 1., 0., 0., 0.]), ' ', array([ 1., 0., 0., 0.])), ('HT6W45', ': ', array([40, 0, 0, 1]), ' ', array([ 0.97560976, 0. , 0. , 0.02439024]), ' ', array([ 1., 0., 0., 0.])), ('HT6W47', ': ', array([29, 0, 0, 1]), ' ', array([ 0.96666667, 0. , 0. , 0.03333333]), ' ', array([ 1., 0., 0., 0.])), ('HT6W48', ': ', array([47, 0, 0, 0]), ' ', array([ 1., …	10110010	0.991837	0.511066	1	1
425	10	103616451	ATTxTTG	C	A	[('HT6W37', ': ', array([ 0, 0, 47, 0]), ' ', array([ 0., 0., 1., 0.]), ' ', array([ 0., 0., 1., 0.])), ('HT6W45', ': ', array([ 1, 0, 28, 0]), ' ', array([ 0.03448276, 0. , 0.96551724, 0. ]), ' ', array([ 0., 0., 1., 0.])), ('HT6W47', ': ', array([ 1, 0, 44, 1]), ' ', array([ 0.02173913, 0. , 0.95652174, 0.02173913]), ' ', array([ 0., 0., 1., 0.])), ('HT6W48', ': ', array([ 0, 1, 39, 0]), ' ', a…	10110010	0.990217	0.509788	1	1
426	10	103810401	TGAxGTC	G	A	[('HT6W37', ': ', array([ 0, 0, 0, 47]), ' ', array([ 0., 0., 0., 1.]), ' ', array([ 0., 0., 0., 1.])), ('HT6W45', ': ', array([ 1, 0, 0, 33]), ' ', array([ 0.02941176, 0. , 0. , 0.97058824]), ' ', array([ 0., 0., 0., 1.])), ('HT6W47', ': ', array([ 1, 0, 0, 46]), ' ', array([ 0.0212766, 0. , 0. , 0.9787234]), ' ', array([ 0., 0., 0., 1.])), ('HT6W48', ': ', array([ 0, 1, 0, 33]), ' ', array([ 0.…	100010	0.994368	0.51645	1	1
427	10	104980801	ATAxAAT	A	C	[('HT6W37', ': ', array([29, 0, 0, 0]), ' ', array([ 1., 0., 0., 0.]), ' ', array([ 1., 0., 0., 0.])), ('HT6W45', ': ', array([33, 0, 0, 0]), ' ', array([ 1., 0., 0., 0.]), ' ', array([ 1., 0., 0., 0.])), ('HT6W47', ': ', array([24, 0, 0, 1]), ' ', array([ 0.96, 0. , 0. , 0.04]), ' ', array([ 1., 0., 0., 0.])), ('HT6W48', ': ', array([45, 0, 0, 0]), ' ', array([ 1., 0., 0., 0.]), ' ', array([ 1.,…	10110010	0.991039	0.525828	1	1
428	10	108573367	ATCxATC	T	G	[('HT6W37', ': ', array([ 0, 34, 0, 0]), ' ', array([ 0., 1., 0., 0.]), ' ', array([ 0., 1., 0., 0.])), ('HT6W45', ': ', array([ 0, 41, 0, 0]), ' ', array([ 0., 1., 0., 0.]), ' ', array([ 0., 1., 0., 0.])), ('HT6W47', ': ', array([ 0, 50, 0, 0]), ' ', array([ 0., 1., 0., 0.]), ' ', array([ 0., 1., 0., 0.])), ('HT6W48', ': ', array([ 0, 39, 0, 1]), ' ', array([ 0. , 0.975, 0. , 0.025]), ' ', array…	10110010	0.992568	0.539	1	1
429	10	115799905	AGAxTCA	G	A	[('HT6W37', ': ', array([ 0, 0, 0, 52]), ' ', array([ 0., 0., 0., 1.]), ' ', array([ 0., 0., 0., 1.])), ('HT6W45', ': ', array([ 0, 0, 0, 66]), ' ', array([ 0., 0., 0., 1.]), ' ', array([ 0., 0., 0., 1.])), ('HT6W47', ': ', array([ 0, 0, 0, 59]), ' ', array([ 0., 0., 0., 1.]), ' ', array([ 0., 0., 0., 1.])), ('HT6W48', ': ', array([ 0, 0, 1, 61]), ' ', array([ 0. , 0. , 0.01612903, 0.98387097]), …	10110010	0.995791	0.35846	1	1
430	10	117920765	CTGxAAG	G	T	[('HT6W37', ': ', array([ 0, 0, 0, 26]), ' ', array([ 0., 0., 0., 1.]), ' ', array([ 0., 0., 0., 1.])), ('HT6W45', ': ', array([ 0, 0, 0, 40]), ' ', array([ 0., 0., 0., 1.]), ' ', array([ 0., 0., 0., 1.])), ('HT6W47', ': ', array([ 0, 1, 0, 36]), ' ', array([ 0. , 0.02702703, 0. , 0.97297297]), ' ', array([ 0., 0., 0., 1.])), ('HT6W48', ': ', array([ 0, 0, 0, 35]), ' ', array([ 0., 0., 0., 1.]), …	100010	0.994682	0.476417	1	1
431	10	120055925	GGAxCAG	G	T	[('HT6W37', ': ', array([ 0, 0, 0, 40]), ' ', array([ 0., 0., 0., 1.]), ' ', array([ 0., 0., 0., 1.])), ('HT6W45', ': ', array([ 0, 0, 0, 37]), ' ', array([ 0., 0., 0., 1.]), ' ', array([ 0., 0., 0., 1.])), ('HT6W47', ': ', array([ 0, 0, 0, 51]), ' ', array([ 0., 0., 0., 1.]), ' ', array([ 0., 0., 0., 1.])), ('HT6W48', ': ', array([ 0, 0, 0, 37]), ' ', array([ 0., 0., 0., 1.]), ' ', array([ 0., 0…	10110010	1	0.46141	1	1
432	11	5675785	GGTxCCA	G	A	[('HT6W37', ': ', array([ 0, 0, 0, 30]), ' ', array([ 0., 0., 0., 1.]), ' ', array([ 0., 0., 0., 1.])), ('HT6W45', ': ', array([ 0, 0, 0, 34]), ' ', array([ 0., 0., 0., 1.]), ' ', array([ 0., 0., 0., 1.])), ('HT6W47', ': ', array([ 0, 0, 0, 38]), ' ', array([ 0., 0., 0., 1.]), ' ', array([ 0., 0., 0., 1.])), ('HT6W48', ': ', array([ 0, 0, 0, 40]), ' ', array([ 0., 0., 0., 1.]), ' ', array([ 0., 0…	10110010	0.995918	0.544124	1	1
433	11	6129056	TTCxCAG	C	T	[('HT6W37', ': ', array([ 0, 0, 43, 0]), ' ', array([ 0., 0., 1., 0.]), ' ', array([ 0., 0., 1., 0.])), ('HT6W45', ': ', array([ 0, 0, 40, 0]), ' ', array([ 0., 0., 1., 0.]), ' ', array([ 0., 0., 1., 0.])), ('HT6W47', ': ', array([ 0, 0, 39, 0]), ' ', array([ 0., 0., 1., 0.]), ' ', array([ 0., 0., 1., 0.])), ('HT6W48', ': ', array([ 0, 0, 37, 0]), ' ', array([ 0., 0., 1., 0.]), ' ', array([ 0., 0…	10110010	1	0.442324	1	1
434	11	21363070	GTAxGAG	G	T	[('HT6W37', ': ', array([ 0, 0, 0, 30]), ' ', array([ 0., 0., 0., 1.]), ' ', array([ 0., 0., 0., 1.])), ('HT6W45', ': ', array([ 0, 0, 0, 30]), ' ', array([ 0., 0., 0., 1.]), ' ', array([ 0., 0., 0., 1.])), ('HT6W47', ': ', array([ 0, 0, 1, 34]), ' ', array([ 0. , 0. , 0.02857143, 0.97142857]), ' ', array([ 0., 0., 0., 1.])), ('HT6W48', ': ', array([ 0, 0, 0, 42]), ' ', array([ 0., 0., 0., 1.]), …	10110010	0.995918	0.554802	1	1
435	11	21469683	TCAxCAG	A	G	[('HT6W37', ': ', array([37, 0, 0, 0]), ' ', array([ 1., 0., 0., 0.]), ' ', array([ 1., 0., 0., 0.])), ('HT6W45', ': ', array([34, 0, 0, 0]), ' ', array([ 1., 0., 0., 0.]), ' ', array([ 1., 0., 0., 0.])), ('HT6W47', ': ', array([44, 0, 0, 0]), ' ', array([ 1., 0., 0., 0.]), ' ', array([ 1., 0., 0., 0.])), ('HT6W48', ': ', array([34, 0, 0, 0]), ' ', array([ 1., 0., 0., 0.]), ' ', array([ 1., 0., 0…	10110010	1	0.476573	1	1
436	11	23208102	CTTxTCT	G	A	[('HT6W37', ': ', array([ 0, 0, 0, 46]), ' ', array([ 0., 0., 0., 1.]), ' ', array([ 0., 0., 0., 1.])), ('HT6W45', ': ', array([ 0, 0, 0, 40]), ' ', array([ 0., 0., 0., 1.]), ' ', array([ 0., 0., 0., 1.])), ('HT6W47', ': ', array([ 0, 0, 0, 46]), ' ', array([ 0., 0., 0., 1.]), ' ', array([ 0., 0., 0., 1.])), ('HT6W48', ': ', array([ 0, 0, 0, 48]), ' ', array([ 0., 0., 0., 1.]), ' ', array([ 0., 0…	10110010	1	0.528823	1	1
437	11	23429308	GGAxATT	G	T	[('HT6W37', ': ', array([ 0, 0, 1, 34]), ' ', array([ 0. , 0. , 0.02777778, 0.94444444]), ' ', array([ 0., 0., 0., 1.])), ('HT6W45', ': ', array([ 0, 0, 0, 40]), ' ', array([ 0., 0., 0., 1.]), ' ', array([ 0., 0., 0., 1.])), ('HT6W47', ': ', array([ 0, 1, 0, 47]), ' ', array([ 0. , 0.02083333, 0. , 0.97916667]), ' ', array([ 0., 0., 0., 1.])), ('HT6W48', ': ', array([ 1, 0, 0, 49]), ' ', array([ …	10110010	0.980446	0.549399	1	1
438	11	23455655	CCAxAAT	G	T	[('HT6W37', ': ', array([ 0, 0, 0, 46]), ' ', array([ 0., 0., 0., 1.]), ' ', array([ 0., 0., 0., 1.])), ('HT6W45', ': ', array([ 0, 0, 0, 42]), ' ', array([ 0., 0., 0., 1.]), ' ', array([ 0., 0., 0., 1.])), ('HT6W47', ': ', array([ 0, 0, 0, 41]), ' ', array([ 0., 0., 0., 1.]), ' ', array([ 0., 0., 0., 1.])), ('HT6W48', ': ', array([ 0, 0, 0, 44]), ' ', array([ 0., 0., 0., 1.]), ' ', array([ 0., 0…	10110010	0.996337	0.352779	1	1
439	11	25055133	AACxTCC	T	A	[('HT6W37', ': ', array([ 0, 32, 0, 1]), ' ', array([ 0. , 0.96969697, 0. , 0.03030303]), ' ', array([ 0., 1., 0., 0.])), ('HT6W45', ': ', array([ 0, 41, 1, 0]), ' ', array([ 0. , 0.97619048, 0.02380952, 0. ]), ' ', array([ 0., 1., 0., 0.])), ('HT6W47', ': ', array([ 0, 36, 0, 0]), ' ', array([ 0., 1., 0., 0.]), ' ', array([ 0., 1., 0., 0.])), ('HT6W48', ': ', array([ 0, 41, 0, 0]), ' ', array([ …	10110010	0.995671	0.484783	1	1
440	11	27975537	GGAxTTG	G	A	[('HT6W37', ': ', array([ 0, 0, 0, 38]), ' ', array([ 0., 0., 0., 1.]), ' ', array([ 0., 0., 0., 1.])), ('HT6W45', ': ', array([ 0, 0, 0, 38]), ' ', array([ 0., 0., 0., 1.]), ' ', array([ 0., 0., 0., 1.])), ('HT6W47', ': ', array([ 0, 0, 0, 32]), ' ', array([ 0., 0., 0., 1.]), ' ', array([ 0., 0., 0., 1.])), ('HT6W48', ': ', array([ 0, 0, 0, 35]), ' ', array([ 0., 0., 0., 1.]), ' ', array([ 0., 0…	10110010	0.995392	0.457896	1	1
441	11	35986900	CTAxTTT	C	T	[('HT6W37', ': ', array([ 0, 1, 41, 0]), ' ', array([ 0. , 0.02380952, 0.97619048, 0. ]), ' ', array([ 0., 0., 1., 0.])), ('HT6W45', ': ', array([ 0, 0, 29, 0]), ' ', array([ 0., 0., 1., 0.]), ' ', array([ 0., 0., 1., 0.])), ('HT6W47', ': ', array([ 0, 0, 39, 0]), ' ', array([ 0., 0., 1., 0.]), ' ', array([ 0., 0., 1., 0.])), ('HT6W48', ': ', array([ 0, 0, 65, 0]), ' ', array([ 0., 0., 1., 0.]), …	10110010	0.993741	0.437575	1	1
442	11	39897709	AGTxATT	A	C	[('HT6W37', ': ', array([43, 0, 0, 0]), ' ', array([ 1., 0., 0., 0.]), ' ', array([ 1., 0., 0., 0.])), ('HT6W45', ': ', array([35, 0, 0, 0]), ' ', array([ 1., 0., 0., 0.]), ' ', array([ 1., 0., 0., 0.])), ('HT6W47', ': ', array([36, 0, 0, 0]), ' ', array([ 1., 0., 0., 0.]), ' ', array([ 1., 0., 0., 0.])), ('HT6W48', ': ', array([42, 0, 1, 0]), ' ', array([ 0.97674419, 0. , 0.02325581, 0. ]), ' ',…	10110010	0.993193	0.541977	1	1
443	11	41115727	CTCxTAT	T	G	[('HT6W37', ': ', array([ 0, 35, 0, 0]), ' ', array([ 0., 1., 0., 0.]), ' ', array([ 0., 1., 0., 0.])), ('HT6W45', ': ', array([ 0, 36, 0, 0]), ' ', array([ 0., 1., 0., 0.]), ' ', array([ 0., 1., 0., 0.])), ('HT6W47', ': ', array([ 0, 36, 1, 0]), ' ', array([ 0. , 0.97297297, 0.02702703, 0. ]), ' ', array([ 0., 1., 0., 0.])), ('HT6W48', ': ', array([ 0, 27, 0, 0]), ' ', array([ 0., 1., 0., 0.]), …	10110010	0.996139	0.537692	1	1
444	11	41363241	AAAxAAT	G	T	[('HT6W37', ': ', array([ 0, 0, 0, 33]), ' ', array([ 0., 0., 0., 1.]), ' ', array([ 0., 0., 0., 1.])), ('HT6W45', ': ', array([ 0, 0, 0, 28]), ' ', array([ 0., 0., 0., 1.]), ' ', array([ 0., 0., 0., 1.])), ('HT6W47', ': ', array([ 0, 0, 0, 46]), ' ', array([ 0., 0., 0., 1.]), ' ', array([ 0., 0., 0., 1.])), ('HT6W48', ': ', array([ 0, 0, 0, 50]), ' ', array([ 0., 0., 0., 1.]), ' ', array([ 0., 0…	10110010	1	0.48697	1	1
445	11	42063079	ACAxATT	A	C	[('HT6W37', ': ', array([34, 0, 0, 0]), ' ', array([ 1., 0., 0., 0.]), ' ', array([ 1., 0., 0., 0.])), ('HT6W45', ': ', array([38, 0, 0, 0]), ' ', array([ 1., 0., 0., 0.]), ' ', array([ 1., 0., 0., 0.])), ('HT6W47', ': ', array([51, 0, 0, 0]), ' ', array([ 1., 0., 0., 0.]), ' ', array([ 1., 0., 0., 0.])), ('HT6W48', ': ', array([43, 0, 0, 0]), ' ', array([ 1., 0., 0., 0.]), ' ', array([ 1., 0., 0…	10110010	0.995918	0.443649	1	1
446	11	50251489	AACxTAA	T	G	[('HT6W37', ': ', array([ 1, 27, 0, 0]), ' ', array([ 0.03571429, 0.96428571, 0. , 0. ]), ' ', array([ 0., 1., 0., 0.])), ('HT6W45', ': ', array([ 1, 37, 0, 0]), ' ', array([ 0.02631579, 0.97368421, 0. , 0. ]), ' ', array([ 0., 1., 0., 0.])), ('HT6W47', ': ', array([ 0, 49, 0, 0]), ' ', array([ 0., 1., 0., 0.]), ' ', array([ 0., 1., 0., 0.])), ('HT6W48', ': ', array([ 0, 42, 0, 2]), ' ', array([ …	10110010	0.981283	0.458475	1	1
447	11	50264166	GACxTAC	T	G	[('HT6W37', ': ', array([ 0, 33, 0, 0]), ' ', array([ 0., 1., 0., 0.]), ' ', array([ 0., 1., 0., 0.])), ('HT6W45', ': ', array([ 0, 45, 0, 0]), ' ', array([ 0., 1., 0., 0.]), ' ', array([ 0., 1., 0., 0.])), ('HT6W47', ': ', array([ 0, 38, 0, 0]), ' ', array([ 0., 1., 0., 0.]), ' ', array([ 0., 1., 0., 0.])), ('HT6W48', ': ', array([ 1, 39, 0, 0]), ' ', array([ 0.025, 0.975, 0. , 0. ]), ' ', array…	10110010	0.996429	0.508979	1	1
448	11	55238598	CAAxACT	G	T	[('HT6W37', ': ', array([ 0, 0, 1, 28]), ' ', array([ 0. , 0. , 0.03448276, 0.96551724]), ' ', array([ 0., 0., 0., 1.])), ('HT6W45', ': ', array([ 0, 0, 1, 32]), ' ', array([ 0. , 0. , 0.03030303, 0.96969697]), ' ', array([ 0., 0., 0., 1.])), ('HT6W47', ': ', array([ 0, 0, 0, 37]), ' ', array([ 0., 0., 0., 1.]), ' ', array([ 0., 0., 0., 1.])), ('HT6W48', ': ', array([ 0, 0, 0, 29]), ' ', array([ …	10110010	0.989783	0.467412	1	1
449	11	56138939	ACAxACA	G	T	[('HT6W37', ': ', array([ 0, 0, 0, 30]), ' ', array([ 0., 0., 0., 1.]), ' ', array([ 0., 0., 0., 1.])), ('HT6W45', ': ', array([ 0, 0, 0, 39]), ' ', array([ 0., 0., 0., 1.]), ' ', array([ 0., 0., 0., 1.])), ('HT6W47', ': ', array([ 0, 0, 0, 37]), ' ', array([ 0., 0., 0., 1.]), ' ', array([ 0., 0., 0., 1.])), ('HT6W48', ': ', array([ 0, 0, 1, 31]), ' ', array([ 0. , 0. , 0.03125, 0.96875]), ' ', a…	10110010	0.991567	0.548781	1	1
450	11	78798523	CAGxGAT	A	T	[('HT6W37', ': ', array([38, 0, 0, 0]), ' ', array([ 1., 0., 0., 0.]), ' ', array([ 1., 0., 0., 0.])), ('HT6W45', ': ', array([33, 0, 0, 0]), ' ', array([ 1., 0., 0., 0.]), ' ', array([ 1., 0., 0., 0.])), ('HT6W47', ': ', array([42, 0, 0, 0]), ' ', array([ 1., 0., 0., 0.]), ' ', array([ 1., 0., 0., 0.])), ('HT6W48', ': ', array([44, 0, 0, 0]), ' ', array([ 1., 0., 0., 0.]), ' ', array([ 1., 0., 0…	10110010	0.990801	0.479762	1	1
451	11	80552884	AAAxATT	G	T	[('HT6W37', ': ', array([ 0, 0, 0, 41]), ' ', array([ 0., 0., 0., 1.]), ' ', array([ 0., 0., 0., 1.])), ('HT6W45', ': ', array([ 0, 0, 0, 30]), ' ', array([ 0., 0., 0., 1.]), ' ', array([ 0., 0., 0., 1.])), ('HT6W47', ': ', array([ 1, 0, 0, 37]), ' ', array([ 0.02631579, 0. , 0. , 0.97368421]), ' ', array([ 0., 0., 0., 1.])), ('HT6W48', ': ', array([ 0, 0, 0, 35]), ' ', array([ 0., 0., 0., 1.]), …	10110010	0.992669	0.494298	1	1
452	11	81904990	AAAxACT	G	A	[('HT6W37', ': ', array([ 0, 1, 0, 23]), ' ', array([ 0. , 0.04166667, 0. , 0.95833333]), ' ', array([ 0., 0., 0., 1.])), ('HT6W45', ': ', array([ 0, 0, 0, 37]), ' ', array([ 0., 0., 0., 1.]), ' ', array([ 0., 0., 0., 1.])), ('HT6W47', ': ', array([ 0, 0, 0, 46]), ' ', array([ 0., 0., 0., 1.]), ' ', array([ 0., 0., 0., 1.])), ('HT6W48', ': ', array([ 0, 0, 0, 43]), ' ', array([ 0., 0., 0., 1.]), …	10110010	0.989719	0.487009	1	1
453	11	82273231	TAGxGTT	C	A	[('HT6W37', ': ', array([ 0, 0, 42, 0]), ' ', array([ 0., 0., 1., 0.]), ' ', array([ 0., 0., 1., 0.])), ('HT6W45', ': ', array([ 0, 0, 36, 1]), ' ', array([ 0. , 0. , 0.97297297, 0.02702703]), ' ', array([ 0., 0., 1., 0.])), ('HT6W47', ': ', array([ 0, 0, 50, 0]), ' ', array([ 0., 0., 1., 0.]), ' ', array([ 0., 0., 1., 0.])), ('HT6W48', ': ', array([ 0, 0, 52, 0]), ' ', array([ 0., 0., 1., 0.]), …	10110010	0.993424	0.439316	1	1
454	11	83950827	GTGxTTT	T	G	[('HT6W37', ': ', array([ 0, 23, 0, 0]), ' ', array([ 0., 1., 0., 0.]), ' ', array([ 0., 1., 0., 0.])), ('HT6W45', ': ', array([ 0, 46, 0, 0]), ' ', array([ 0., 1., 0., 0.]), ' ', array([ 0., 1., 0., 0.])), ('HT6W47', ': ', array([ 0, 39, 0, 0]), ' ', array([ 0., 1., 0., 0.]), ' ', array([ 0., 1., 0., 0.])), ('HT6W48', ': ', array([ 0, 47, 0, 0]), ' ', array([ 0., 1., 0., 0.]), ' ', array([ 0., 1…	10110010	1	0.477945	1	1
455	11	85663379	CATxAAC	G	T	[('HT6W37', ': ', array([ 0, 0, 0, 49]), ' ', array([ 0., 0., 0., 1.]), ' ', array([ 0., 0., 0., 1.])), ('HT6W45', ': ', array([ 0, 0, 0, 40]), ' ', array([ 0., 0., 0., 1.]), ' ', array([ 0., 0., 0., 1.])), ('HT6W47', ': ', array([ 0, 0, 0, 43]), ' ', array([ 0., 0., 0., 1.]), ' ', array([ 0., 0., 0., 1.])), ('HT6W48', ': ', array([ 0, 0, 0, 49]), ' ', array([ 0., 0., 0., 1.]), ' ', array([ 0., 0…	10110010	0.994366	0.47119	1	1
456	11	90027977	TCCxTCC	C	T	[('HT6W37', ': ', array([ 0, 0, 22, 0]), ' ', array([ 0., 0., 1., 0.]), ' ', array([ 0., 0., 1., 0.])), ('HT6W45', ': ', array([ 0, 0, 20, 0]), ' ', array([ 0., 0., 1., 0.]), ' ', array([ 0., 0., 1., 0.])), ('HT6W47', ': ', array([ 0, 0, 21, 0]), ' ', array([ 0., 0., 1., 0.]), ' ', array([ 0., 0., 1., 0.])), ('HT6W48', ': ', array([ 0, 0, 20, 0]), ' ', array([ 0., 0., 1., 0.]), ' ', array([ 0., 0…	100010	0.992181	0.396104	0.999328	1
457	11	90027981	TCCxTCC	C	T	[('HT6W37', ': ', array([ 0, 0, 21, 0]), ' ', array([ 0., 0., 1., 0.]), ' ', array([ 0., 0., 1., 0.])), ('HT6W45', ': ', array([ 0, 1, 21, 0]), ' ', array([ 0. , 0.04545455, 0.95454545, 0. ]), ' ', array([ 0., 0., 1., 0.])), ('HT6W47', ': ', array([ 0, 0, 22, 0]), ' ', array([ 0., 0., 1., 0.]), ' ', array([ 0., 0., 1., 0.])), ('HT6W48', ': ', array([ 0, 0, 19, 0]), ' ', array([ 0., 0., 1., 0.]), …	100010	0.988185	0.45	0.999971	1
458	11	91439148	ATTxTTT	T	G	[('HT6W37', ': ', array([ 0, 30, 0, 0]), ' ', array([ 0., 1., 0., 0.]), ' ', array([ 0., 1., 0., 0.])), ('HT6W45', ': ', array([ 0, 29, 0, 0]), ' ', array([ 0., 1., 0., 0.]), ' ', array([ 0., 1., 0., 0.])), ('HT6W47', ': ', array([ 0, 40, 0, 0]), ' ', array([ 0., 1., 0., 0.]), ' ', array([ 0., 1., 0., 0.])), ('HT6W48', ': ', array([ 1, 65, 0, 0]), ' ', array([ 0.01515152, 0.98484848, 0. , 0. ]), …	10110010	0.989338	0.52699	1	1
459	11	97991560	TGAxATC	A	C	[('HT6W37', ': ', array([37, 0, 0, 0]), ' ', array([ 1., 0., 0., 0.]), ' ', array([ 1., 0., 0., 0.])), ('HT6W45', ': ', array([44, 0, 0, 0]), ' ', array([ 1., 0., 0., 0.]), ' ', array([ 1., 0., 0., 0.])), ('HT6W47', ': ', array([42, 0, 0, 0]), ' ', array([ 1., 0., 0., 0.]), ' ', array([ 1., 0., 0., 0.])), ('HT6W48', ': ', array([37, 0, 0, 0]), ' ', array([ 1., 0., 0., 0.]), ' ', array([ 1., 0., 0…	10110010	1	0.426768	1	1
460	11	98622483	ATAxATG	G	T	[('HT6W37', ': ', array([ 0, 0, 0, 42]), ' ', array([ 0., 0., 0., 1.]), ' ', array([ 0., 0., 0., 1.])), ('HT6W45', ': ', array([ 0, 0, 0, 30]), ' ', array([ 0., 0., 0., 1.]), ' ', array([ 0., 0., 0., 1.])), ('HT6W47', ': ', array([ 0, 0, 0, 30]), ' ', array([ 0., 0., 0., 1.]), ' ', array([ 0., 0., 0., 1.])), ('HT6W48', ': ', array([ 0, 1, 0, 35]), ' ', array([ 0. , 0.02777778, 0. , 0.97222222]), …	10110010	0.992857	0.520048	1	1
461	11	100550945	TTAxTTT	G	A	[('HT6W37', ': ', array([ 0, 0, 0, 30]), ' ', array([ 0., 0., 0., 1.]), ' ', array([ 0., 0., 0., 1.])), ('HT6W45', ': ', array([ 0, 0, 0, 43]), ' ', array([ 0., 0., 0., 1.]), ' ', array([ 0., 0., 0., 1.])), ('HT6W47', ': ', array([ 0, 0, 0, 41]), ' ', array([ 0., 0., 0., 1.]), ' ', array([ 0., 0., 0., 1.])), ('HT6W48', ': ', array([ 0, 0, 0, 41]), ' ', array([ 0., 0., 0., 1.]), ' ', array([ 0., 0…	10110010	0.997024	0.497797	1	1
462	11	109544716	CTGxTTG	G	C	[('HT6W37', ': ', array([ 0, 0, 0, 39]), ' ', array([ 0., 0., 0., 1.]), ' ', array([ 0., 0., 0., 1.])), ('HT6W45', ': ', array([ 0, 0, 0, 42]), ' ', array([ 0., 0., 0., 1.]), ' ', array([ 0., 0., 0., 1.])), ('HT6W47', ': ', array([ 0, 0, 0, 39]), ' ', array([ 0., 0., 0., 1.]), ' ', array([ 0., 0., 0., 1.])), ('HT6W48', ': ', array([ 0, 0, 0, 30]), ' ', array([ 0., 0., 0., 1.]), ' ', array([ 0., 0…	10110010	0.996032	0.339117	1	1
463	11	115763295	AAAxAAA	G	T	[('HT6W37', ': ', array([ 1, 0, 0, 34]), ' ', array([ 0.02857143, 0. , 0. , 0.97142857]), ' ', array([ 0., 0., 0., 1.])), ('HT6W45', ': ', array([ 0, 0, 1, 32]), ' ', array([ 0. , 0. , 0.03030303, 0.96969697]), ' ', array([ 0., 0., 0., 1.])), ('HT6W47', ': ', array([ 0, 1, 0, 45]), ' ', array([ 0. , 0.02173913, 0. , 0.97826087]), ' ', array([ 0., 0., 0., 1.])), ('HT6W48', ': ', array([ 0, 0, 0, 5…	10110010	0.988952	0.462416	1	1
464	11	116178952	AAAxATT	A	T	[('HT6W37', ': ', array([33, 0, 1, 1]), ' ', array([ 0.94285714, 0. , 0.02857143, 0.02857143]), ' ', array([ 1., 0., 0., 0.])), ('HT6W45', ': ', array([29, 0, 0, 0]), ' ', array([ 1., 0., 0., 0.]), ' ', array([ 1., 0., 0., 0.])), ('HT6W47', ': ', array([28, 0, 0, 0]), ' ', array([ 1., 0., 0., 0.]), ' ', array([ 1., 0., 0., 0.])), ('HT6W48', ': ', array([32, 1, 0, 0]), ' ', array([ 0.96969697, 0.0…	100010	0.984223	0.541033	1	1
465	11	121303710	TAAxATT	A	C	[('HT6W37', ': ', array([42, 0, 0, 0]), ' ', array([ 1., 0., 0., 0.]), ' ', array([ 1., 0., 0., 0.])), ('HT6W45', ': ', array([26, 0, 1, 0]), ' ', array([ 0.96296296, 0. , 0.03703704, 0. ]), ' ', array([ 1., 0., 0., 0.])), ('HT6W47', ': ', array([43, 0, 0, 0]), ' ', array([ 0.97727273, 0. , 0. , 0. ]), ' ', array([ 1., 0., 0., 0.])), ('HT6W48', ': ', array([29, 0, 0, 1]), ' ', array([ 0.96666667,…	10110010	0.991036	0.533132	1	1
466	11	121553433	CGAxACT	G	T	[('HT6W37', ': ', array([ 0, 0, 0, 43]), ' ', array([ 0., 0., 0., 1.]), ' ', array([ 0., 0., 0., 1.])), ('HT6W45', ': ', array([ 0, 0, 0, 41]), ' ', array([ 0., 0., 0., 1.]), ' ', array([ 0., 0., 0., 1.])), ('HT6W47', ': ', array([ 0, 0, 0, 43]), ' ', array([ 0., 0., 0., 1.]), ' ', array([ 0., 0., 0., 1.])), ('HT6W48', ': ', array([ 0, 0, 0, 46]), ' ', array([ 0., 0., 0., 1.]), ' ', array([ 0., 0…	10110010	1	0.56405	1	1
467	11	121882808	CCAxTTT	G	A	[('HT6W37', ': ', array([ 0, 0, 0, 37]), ' ', array([ 0., 0., 0., 1.]), ' ', array([ 0., 0., 0., 1.])), ('HT6W45', ': ', array([ 0, 0, 0, 45]), ' ', array([ 0., 0., 0., 1.]), ' ', array([ 0., 0., 0., 1.])), ('HT6W47', ': ', array([ 0, 0, 0, 41]), ' ', array([ 0., 0., 0., 1.]), ' ', array([ 0., 0., 0., 1.])), ('HT6W48', ': ', array([ 0, 0, 0, 50]), ' ', array([ 0., 0., 0., 1.]), ' ', array([ 0., 0…	10110010	0.996429	0.501745	1	1
468	11	125081529	TTCxGGG	T	A	[('HT6W37', ': ', array([ 0, 25, 0, 0]), ' ', array([ 0., 1., 0., 0.]), ' ', array([ 0., 1., 0., 0.])), ('HT6W45', ': ', array([ 0, 43, 0, 0]), ' ', array([ 0., 1., 0., 0.]), ' ', array([ 0., 1., 0., 0.])), ('HT6W47', ': ', array([ 0, 42, 0, 0]), ' ', array([ 0., 1., 0., 0.]), ' ', array([ 0., 1., 0., 0.])), ('HT6W48', ': ', array([ 0, 40, 0, 0]), ' ', array([ 0., 1., 0., 0.]), ' ', array([ 0., 1…	10110010	1	0.553706	1	1
469	11	134346182	AAAxGAT	G	T	[('HT6W37', ': ', array([ 0, 0, 0, 49]), ' ', array([ 0., 0., 0., 1.]), ' ', array([ 0., 0., 0., 1.])), ('HT6W45', ': ', array([ 0, 0, 2, 34]), ' ', array([ 0. , 0. , 0.05555556, 0.94444444]), ' ', array([ 0., 0., 0., 1.])), ('HT6W47', ': ', array([ 0, 0, 0, 39]), ' ', array([ 0., 0., 0., 1.]), ' ', array([ 0., 0., 0., 1.])), ('HT6W48', ': ', array([ 0, 0, 0, 46]), ' ', array([ 0., 0., 0., 1.]), …	10110010	1	0.517465	1	1
470	11	134425075	GGTxACT	G	T	[('HT6W37', ': ', array([ 0, 0, 0, 40]), ' ', array([ 0., 0., 0., 1.]), ' ', array([ 0., 0., 0., 1.])), ('HT6W45', ': ', array([ 0, 0, 0, 34]), ' ', array([ 0., 0., 0., 1.]), ' ', array([ 0., 0., 0., 1.])), ('HT6W47', ': ', array([ 0, 0, 0, 39]), ' ', array([ 0., 0., 0., 1.]), ' ', array([ 0., 0., 0., 1.])), ('HT6W48', ': ', array([ 0, 0, 0, 40]), ' ', array([ 0., 0., 0., 1.]), ' ', array([ 0., 0…	100010	0.997821	0.488095	1	1
471	12	241728	ACAxTCT	T	C	[('HT6W37', ': ', array([ 0, 61, 0, 0]), ' ', array([ 0., 1., 0., 0.]), ' ', array([ 0., 1., 0., 0.])), ('HT6W45', ': ', array([ 0, 63, 0, 1]), ' ', array([ 0. , 0.984375, 0. , 0.015625]), ' ', array([ 0., 1., 0., 0.])), ('HT6W47', ': ', array([ 0, 52, 0, 0]), ' ', array([ 0., 1., 0., 0.]), ' ', array([ 0., 1., 0., 0.])), ('HT6W48', ': ', array([ 0, 71, 0, 0]), ' ', array([ 0., 1., 0., 0.]), ' ',…	100010	0.992233	0.300288	1	1
472	12	10610081	AAAxGTA	G	T	[('HT6W37', ': ', array([ 0, 0, 0, 53]), ' ', array([ 0., 0., 0., 1.]), ' ', array([ 0., 0., 0., 1.])), ('HT6W45', ': ', array([ 0, 0, 0, 64]), ' ', array([ 0., 0., 0., 1.]), ' ', array([ 0., 0., 0., 1.])), ('HT6W47', ': ', array([ 0, 0, 0, 76]), ' ', array([ 0., 0., 0., 1.]), ' ', array([ 0., 0., 0., 1.])), ('HT6W48', ': ', array([ 0, 0, 0, 67]), ' ', array([ 0., 0., 0., 1.]), ' ', array([ 0., 0…	10110010	0.99263	0.388998	1	1
473	12	18228456	TTCxTCT	T	G	[('HT6W37', ': ', array([ 0, 61, 0, 0]), ' ', array([ 0., 1., 0., 0.]), ' ', array([ 0., 1., 0., 0.])), ('HT6W45', ': ', array([ 0, 52, 0, 0]), ' ', array([ 0., 1., 0., 0.]), ' ', array([ 0., 1., 0., 0.])), ('HT6W47', ': ', array([ 0, 52, 0, 0]), ' ', array([ 0. , 0.98113208, 0. , 0. ]), ' ', array([ 0., 1., 0., 0.])), ('HT6W48', ': ', array([ 0, 61, 0, 0]), ' ', array([ 0., 1., 0., 0.]), ' ', ar…	10110010	0.995329	0.353721	1	1
474	12	18457088	AGTxTTA	T	C	[('HT6W37', ': ', array([ 0, 56, 0, 0]), ' ', array([ 0., 1., 0., 0.]), ' ', array([ 0., 1., 0., 0.])), ('HT6W45', ': ', array([ 0, 56, 1, 0]), ' ', array([ 0. , 0.98245614, 0.01754386, 0. ]), ' ', array([ 0., 1., 0., 0.])), ('HT6W47', ': ', array([ 1, 53, 0, 0]), ' ', array([ 0.01851852, 0.98148148, 0. , 0. ]), ' ', array([ 0., 1., 0., 0.])), ('HT6W48', ': ', array([ 0, 57, 0, 0]), ' ', array([ …	10110010	0.995749	0.32907	1	1
475	12	20340674	TAGxAAT	G	A	[('HT6W37', ': ', array([ 0, 1, 1, 54]), ' ', array([ 0. , 0.01785714, 0.01785714, 0.96428571]), ' ', array([ 0., 0., 0., 1.])), ('HT6W45', ': ', array([ 0, 1, 0, 55]), ' ', array([ 0. , 0.01785714, 0. , 0.98214286]), ' ', array([ 0., 0., 0., 1.])), ('HT6W47', ': ', array([ 0, 0, 0, 64]), ' ', array([ 0., 0., 0., 1.]), ' ', array([ 0., 0., 0., 1.])), ('HT6W48', ': ', array([ 1, 0, 0, 70]), ' ', a…	10110010	0.986154	0.324236	1	1
476	12	20384291	AAAxTGA	C	A	[('HT6W37', ': ', array([ 0, 0, 51, 0]), ' ', array([ 0., 0., 1., 0.]), ' ', array([ 0., 0., 1., 0.])), ('HT6W45', ': ', array([ 0, 0, 58, 0]), ' ', array([ 0., 0., 1., 0.]), ' ', array([ 0., 0., 1., 0.])), ('HT6W47', ': ', array([ 0, 1, 53, 1]), ' ', array([ 0. , 0.01818182, 0.96363636, 0.01818182]), ' ', array([ 0., 0., 1., 0.])), ('HT6W48', ': ', array([ 0, 0, 58, 0]), ' ', array([ 0., 0., 1.,…	10110010	0.992641	0.323169	0.999589	1
477	12	24508620	AACxAAA	A	T	[('HT6W37', ': ', array([55, 0, 0, 0]), ' ', array([ 1., 0., 0., 0.]), ' ', array([ 1., 0., 0., 0.])), ('HT6W45', ': ', array([59, 0, 0, 0]), ' ', array([ 1., 0., 0., 0.]), ' ', array([ 1., 0., 0., 0.])), ('HT6W47', ': ', array([72, 1, 0, 0]), ' ', array([ 0.98630137, 0.01369863, 0. , 0. ]), ' ', array([ 1., 0., 0., 0.])), ('HT6W48', ': ', array([72, 0, 1, 0]), ' ', array([ 0.98630137, 0. , 0.013…	100010	0.995531	0.317045	1	1
478	12	24974125	GAAxAAT	A	C	[('HT6W37', ': ', array([52, 1, 0, 0]), ' ', array([ 0.98113208, 0.01886792, 0. , 0. ]), ' ', array([ 1., 0., 0., 0.])), ('HT6W45', ': ', array([58, 0, 0, 0]), ' ', array([ 1., 0., 0., 0.]), ' ', array([ 1., 0., 0., 0.])), ('HT6W47', ': ', array([63, 0, 0, 1]), ' ', array([ 0.984375, 0. , 0. , 0.015625]), ' ', array([ 1., 0., 0., 0.])), ('HT6W48', ': ', array([65, 0, 0, 0]), ' ', array([ 1., 0., …	10110010	0.992033	0.322464	1	1
479	12	25887526	CAGxTTT	T	A	[('HT6W37', ': ', array([ 0, 49, 0, 0]), ' ', array([ 0., 1., 0., 0.]), ' ', array([ 0., 1., 0., 0.])), ('HT6W45', ': ', array([ 0, 68, 0, 1]), ' ', array([ 0. , 0.98550725, 0. , 0.01449275]), ' ', array([ 0., 1., 0., 0.])), ('HT6W47', ': ', array([ 0, 61, 0, 0]), ' ', array([ 0., 1., 0., 0.]), ' ', array([ 0., 1., 0., 0.])), ('HT6W48', ': ', array([ 0, 65, 0, 0]), ' ', array([ 0., 1., 0., 0.]), …	10110010	0.994168	0.31972	1	1
480	12	28874888	AAAxGTA	G	T	[('HT6W37', ': ', array([ 0, 0, 0, 60]), ' ', array([ 0., 0., 0., 1.]), ' ', array([ 0., 0., 0., 1.])), ('HT6W45', ': ', array([ 0, 0, 0, 59]), ' ', array([ 0., 0., 0., 1.]), ' ', array([ 0., 0., 0., 1.])), ('HT6W47', ': ', array([ 0, 1, 0, 62]), ' ', array([ 0. , 0.01587302, 0. , 0.98412698]), ' ', array([ 0., 0., 0., 1.])), ('HT6W48', ': ', array([ 0, 1, 0, 56]), ' ', array([ 0. , 0.01754386, 0…	10110010	0.989512	0.354252	1	1
481	12	40868481	ATTxTGG	C	T	[('HT6W37', ': ', array([ 0, 1, 62, 0]), ' ', array([ 0. , 0.01587302, 0.98412698, 0. ]), ' ', array([ 0., 0., 1., 0.])), ('HT6W45', ': ', array([ 0, 0, 50, 0]), ' ', array([ 0., 0., 1., 0.]), ' ', array([ 0., 0., 1., 0.])), ('HT6W47', ': ', array([ 0, 0, 69, 0]), ' ', array([ 0., 0., 1., 0.]), ' ', array([ 0., 0., 1., 0.])), ('HT6W48', ': ', array([ 0, 0, 69, 0]), ' ', array([ 0., 0., 1., 0.]), …	10110010	0.991422	0.339693	1	1
482	12	40889380	TTAxATG	A	G	[('HT6W37', ': ', array([70, 0, 0, 0]), ' ', array([ 1., 0., 0., 0.]), ' ', array([ 1., 0., 0., 0.])), ('HT6W45', ': ', array([69, 0, 0, 0]), ' ', array([ 1., 0., 0., 0.]), ' ', array([ 1., 0., 0., 0.])), ('HT6W47', ': ', array([75, 0, 1, 0]), ' ', array([ 0.98684211, 0. , 0.01315789, 0. ]), ' ', array([ 1., 0., 0., 0.])), ('HT6W48', ': ', array([52, 0, 0, 0]), ' ', array([ 1., 0., 0., 0.]), ' ',…	10110010	0.993752	0.29666	1	1
483	12	40892828	CAGxACA	G	T	[('HT6W37', ': ', array([ 0, 0, 0, 58]), ' ', array([ 0., 0., 0., 1.]), ' ', array([ 0., 0., 0., 1.])), ('HT6W45', ': ', array([ 1, 0, 1, 53]), ' ', array([ 0.01818182, 0. , 0.01818182, 0.96363636]), ' ', array([ 0., 0., 0., 1.])), ('HT6W47', ': ', array([ 0, 0, 0, 57]), ' ', array([ 0., 0., 0., 1.]), ' ', array([ 0., 0., 0., 1.])), ('HT6W48', ': ', array([ 0, 0, 1, 55]), ' ', array([ 0. , 0. , 0…	10110010	0.994534	0.356262	1	1
484	12	41522583	AGTxTTC	T	C	[('HT6W37', ': ', array([ 0, 58, 0, 0]), ' ', array([ 0., 1., 0., 0.]), ' ', array([ 0., 1., 0., 0.])), ('HT6W45', ': ', array([ 0, 60, 0, 0]), ' ', array([ 0., 1., 0., 0.]), ' ', array([ 0., 1., 0., 0.])), ('HT6W47', ': ', array([ 0, 64, 0, 0]), ' ', array([ 0., 1., 0., 0.]), ' ', array([ 0., 1., 0., 0.])), ('HT6W48', ': ', array([ 0, 73, 0, 0]), ' ', array([ 0., 1., 0., 0.]), ' ', array([ 0., 1…	10110010	1	0.278818	1	1
485	12	42796201	TTGxTGA	T	C	[('HT6W37', ': ', array([ 0, 52, 0, 0]), ' ', array([ 0., 1., 0., 0.]), ' ', array([ 0., 1., 0., 0.])), ('HT6W45', ': ', array([ 0, 61, 0, 1]), ' ', array([ 0. , 0.98387097, 0. , 0.01612903]), ' ', array([ 0., 1., 0., 0.])), ('HT6W47', ': ', array([ 0, 56, 0, 0]), ' ', array([ 0., 1., 0., 0.]), ' ', array([ 0., 1., 0., 0.])), ('HT6W48', ': ', array([ 0, 50, 0, 0]), ' ', array([ 0., 1., 0., 0.]), …	10110010	0.995523	0.34505	1	1
486	12	42838624	AAGxTAG	G	A	[('HT6W37', ': ', array([ 0, 0, 0, 59]), ' ', array([ 0., 0., 0., 1.]), ' ', array([ 0., 0., 0., 1.])), ('HT6W45', ': ', array([ 0, 1, 0, 42]), ' ', array([ 0. , 0.02325581, 0. , 0.97674419]), ' ', array([ 0., 0., 0., 1.])), ('HT6W47', ': ', array([ 0, 1, 0, 54]), ' ', array([ 0. , 0.01818182, 0. , 0.98181818]), ' ', array([ 0., 0., 0., 1.])), ('HT6W48', ': ', array([ 0, 0, 0, 69]), ' ', array([ …	10110010	0.991807	0.376602	1	1
487	12	43276399	ATAxAAG	G	T	[('HT6W37', ': ', array([ 0, 0, 0, 75]), ' ', array([ 0., 0., 0., 1.]), ' ', array([ 0., 0., 0., 1.])), ('HT6W45', ': ', array([ 0, 0, 0, 48]), ' ', array([ 0., 0., 0., 1.]), ' ', array([ 0., 0., 0., 1.])), ('HT6W47', ': ', array([ 0, 0, 0, 61]), ' ', array([ 0., 0., 0., 1.]), ' ', array([ 0., 0., 0., 1.])), ('HT6W48', ': ', array([ 0, 0, 1, 73]), ' ', array([ 0. , 0. , 0.01351351, 0.98648649]), …	10110010	0.990998	0.276479	1	1
488	12	43320033	GAGxATG	A	C	[('HT6W37', ': ', array([53, 0, 0, 0]), ' ', array([ 1., 0., 0., 0.]), ' ', array([ 1., 0., 0., 0.])), ('HT6W45', ': ', array([60, 0, 1, 0]), ' ', array([ 0.98360656, 0. , 0.01639344, 0. ]), ' ', array([ 1., 0., 0., 0.])), ('HT6W47', ': ', array([56, 1, 0, 0]), ' ', array([ 0.98245614, 0.01754386, 0. , 0. ]), ' ', array([ 1., 0., 0., 0.])), ('HT6W48', ': ', array([66, 0, 0, 1]), ' ', array([ 0.98…	10110010	0.990966	0.325992	1	1
489	12	43596576	AAGxCAA	C	T	[('HT6W37', ': ', array([ 0, 0, 38, 0]), ' ', array([ 0., 0., 1., 0.]), ' ', array([ 0., 0., 1., 0.])), ('HT6W45', ': ', array([ 0, 0, 40, 0]), ' ', array([ 0., 0., 1., 0.]), ' ', array([ 0., 0., 1., 0.])), ('HT6W47', ': ', array([ 0, 0, 65, 0]), ' ', array([ 0., 0., 1., 0.]), ' ', array([ 0., 0., 1., 0.])), ('HT6W48', ': ', array([ 0, 0, 62, 0]), ' ', array([ 0., 0., 1., 0.]), ' ', array([ 0., 0…	10110010	0.990591	0.345736	1	1
490	12	45835847	AGTxTGT	C	A	[('HT6W37', ': ', array([ 0, 0, 48, 0]), ' ', array([ 0., 0., 1., 0.]), ' ', array([ 0., 0., 1., 0.])), ('HT6W45', ': ', array([ 0, 0, 57, 0]), ' ', array([ 0., 0., 1., 0.]), ' ', array([ 0., 0., 1., 0.])), ('HT6W47', ': ', array([ 0, 0, 59, 0]), ' ', array([ 0., 0., 1., 0.]), ' ', array([ 0., 0., 1., 0.])), ('HT6W48', ': ', array([ 0, 0, 59, 0]), ' ', array([ 0., 0., 1., 0.]), ' ', array([ 0., 0…	10110010	0.991551	0.31838	1	1
491	12	51038829	AATxTTT	G	T	[('HT6W37', ': ', array([ 0, 0, 0, 53]), ' ', array([ 0., 0., 0., 1.]), ' ', array([ 0., 0., 0., 1.])), ('HT6W45', ': ', array([ 0, 0, 0, 50]), ' ', array([ 0., 0., 0., 1.]), ' ', array([ 0., 0., 0., 1.])), ('HT6W47', ': ', array([ 0, 0, 0, 64]), ' ', array([ 0., 0., 0., 1.]), ' ', array([ 0., 0., 0., 1.])), ('HT6W48', ': ', array([ 0, 0, 0, 80]), ' ', array([ 0., 0., 0., 1.]), ' ', array([ 0., 0…	10110010	0.995405	0.328642	1	1
492	12	55375409	AGAxATT	G	A	[('HT6W37', ': ', array([ 0, 0, 0, 59]), ' ', array([ 0., 0., 0., 1.]), ' ', array([ 0., 0., 0., 1.])), ('HT6W45', ': ', array([ 0, 0, 0, 53]), ' ', array([ 0., 0., 0., 1.]), ' ', array([ 0., 0., 0., 1.])), ('HT6W47', ': ', array([ 1, 0, 0, 68]), ' ', array([ 0.01449275, 0. , 0. , 0.98550725]), ' ', array([ 0., 0., 0., 1.])), ('HT6W48', ': ', array([ 0, 0, 0, 82]), ' ', array([ 0., 0., 0., 1.]), …	10110010	0.994824	0.317759	1	1
493	12	58436114	CTTxGAG	T	G	[('HT6W37', ': ', array([ 1, 47, 1, 0]), ' ', array([ 0.02040816, 0.95918367, 0.02040816, 0. ]), ' ', array([ 0., 1., 0., 0.])), ('HT6W45', ': ', array([ 0, 72, 0, 0]), ' ', array([ 0., 1., 0., 0.]), ' ', array([ 0., 1., 0., 0.])), ('HT6W47', ': ', array([ 0, 68, 0, 0]), ' ', array([ 0., 1., 0., 0.]), ' ', array([ 0., 1., 0., 0.])), ('HT6W48', ': ', array([ 0, 72, 0, 0]), ' ', array([ 0., 1., 0.,…	100010	0.990697	0.334978	1	1
494	12	59179444	TTCxTTA	C	T	[('HT6W37', ': ', array([ 0, 0, 52, 0]), ' ', array([ 0., 0., 1., 0.]), ' ', array([ 0., 0., 1., 0.])), ('HT6W45', ': ', array([ 0, 0, 66, 0]), ' ', array([ 0., 0., 1., 0.]), ' ', array([ 0., 0., 1., 0.])), ('HT6W47', ': ', array([ 0, 0, 49, 0]), ' ', array([ 0., 0., 1., 0.]), ' ', array([ 0., 0., 1., 0.])), ('HT6W48', ': ', array([ 0, 0, 59, 0]), ' ', array([ 0., 0., 1., 0.]), ' ', array([ 0., 0…	10110010	0.992697	0.316127	1	1
495	12	60794649	AACxTTA	T	G	[('HT6W37', ': ', array([ 1, 53, 0, 0]), ' ', array([ 0.01851852, 0.98148148, 0. , 0. ]), ' ', array([ 0., 1., 0., 0.])), ('HT6W45', ': ', array([ 0, 59, 0, 0]), ' ', array([ 0., 1., 0., 0.]), ' ', array([ 0., 1., 0., 0.])), ('HT6W47', ': ', array([ 0, 85, 0, 0]), ' ', array([ 0., 1., 0., 0.]), ' ', array([ 0., 1., 0., 0.])), ('HT6W48', ': ', array([ 0, 59, 0, 0]), ' ', array([ 0., 1., 0., 0.]), …	100010	0.992228	0.34698	1	1
496	12	61438201	AATxTCT	T	A	[('HT6W37', ': ', array([ 0, 47, 0, 0]), ' ', array([ 0., 1., 0., 0.]), ' ', array([ 0., 1., 0., 0.])), ('HT6W45', ': ', array([ 0, 47, 0, 0]), ' ', array([ 0., 1., 0., 0.]), ' ', array([ 0., 1., 0., 0.])), ('HT6W47', ': ', array([ 0, 36, 0, 0]), ' ', array([ 0., 1., 0., 0.]), ' ', array([ 0., 1., 0., 0.])), ('HT6W48', ': ', array([ 0, 52, 0, 0]), ' ', array([ 0., 1., 0., 0.]), ' ', array([ 0., 1…	100010	0.992025	0.272059	0.997469	1
497	12	61443407	AGTxAAC	T	G	[('HT6W37', ': ', array([ 0, 58, 0, 0]), ' ', array([ 0., 1., 0., 0.]), ' ', array([ 0., 1., 0., 0.])), ('HT6W45', ': ', array([ 0, 64, 0, 0]), ' ', array([ 0., 1., 0., 0.]), ' ', array([ 0., 1., 0., 0.])), ('HT6W47', ': ', array([ 1, 55, 1, 0]), ' ', array([ 0.01754386, 0.96491228, 0.01754386, 0. ]), ' ', array([ 0., 1., 0., 0.])), ('HT6W48', ': ', array([ 0, 61, 0, 2]), ' ', array([ 0. , 0.9682…	100010	0.990159	0.315717	1	1
498	12	64736342	AACxTAC	T	G	[('HT6W37', ': ', array([ 0, 55, 0, 1]), ' ', array([ 0. , 0.98214286, 0. , 0.01785714]), ' ', array([ 0., 1., 0., 0.])), ('HT6W45', ': ', array([ 0, 47, 0, 0]), ' ', array([ 0., 1., 0., 0.]), ' ', array([ 0., 1., 0., 0.])), ('HT6W47', ': ', array([ 0, 56, 0, 0]), ' ', array([ 0., 1., 0., 0.]), ' ', array([ 0., 1., 0., 0.])), ('HT6W48', ': ', array([ 0, 66, 0, 0]), ' ', array([ 0., 1., 0., 0.]), …	100010	0.996133	0.330447	1	1
499	12	67585528	TTTxTCA	T	C	[('HT6W37', ': ', array([ 0, 82, 0, 0]), ' ', array([ 0., 1., 0., 0.]), ' ', array([ 0., 1., 0., 0.])), ('HT6W45', ': ', array([ 0, 64, 0, 0]), ' ', array([ 0., 1., 0., 0.]), ' ', array([ 0., 1., 0., 0.])), ('HT6W47', ': ', array([ 0, 78, 0, 0]), ' ', array([ 0., 1., 0., 0.]), ' ', array([ 0., 1., 0., 0.])), ('HT6W48', ': ', array([ 0, 59, 0, 1]), ' ', array([ 0. , 0.98333333, 0. , 0.01666667]), …	10110010	0.997619	0.343418	1	1
500	12	68642114	AGTxGCA	A	G	[('HT6W37', ': ', array([59, 0, 0, 0]), ' ', array([ 1., 0., 0., 0.]), ' ', array([ 1., 0., 0., 0.])), ('HT6W45', ': ', array([48, 0, 0, 0]), ' ', array([ 1., 0., 0., 0.]), ' ', array([ 1., 0., 0., 0.])), ('HT6W47', ': ', array([64, 0, 0, 0]), ' ', array([ 1., 0., 0., 0.]), ' ', array([ 1., 0., 0., 0.])), ('HT6W48', ': ', array([67, 0, 0, 0]), ' ', array([ 1., 0., 0., 0.]), ' ', array([ 1., 0., 0…	10110010	1	0.329312	1	1
501	12	70425714	GGGxCCT	G	C	[('HT6W37', ': ', array([ 0, 0, 0, 52]), ' ', array([ 0., 0., 0., 1.]), ' ', array([ 0., 0., 0., 1.])), ('HT6W45', ': ', array([ 0, 0, 0, 46]), ' ', array([ 0., 0., 0., 1.]), ' ', array([ 0., 0., 0., 1.])), ('HT6W47', ': ', array([ 0, 0, 0, 66]), ' ', array([ 0., 0., 0., 1.]), ' ', array([ 0., 0., 0., 1.])), ('HT6W48', ': ', array([ 0, 0, 0, 74]), ' ', array([ 0., 0., 0., 1.]), ' ', array([ 0., 0…	10110010	0.997449	0.366458	1	1
502	12	70877218	GATxGAT	G	A	[('HT6W37', ': ', array([ 0, 0, 0, 52]), ' ', array([ 0., 0., 0., 1.]), ' ', array([ 0., 0., 0., 1.])), ('HT6W45', ': ', array([ 0, 0, 0, 50]), ' ', array([ 0., 0., 0., 1.]), ' ', array([ 0., 0., 0., 1.])), ('HT6W47', ': ', array([ 0, 0, 0, 48]), ' ', array([ 0., 0., 0., 1.]), ' ', array([ 0., 0., 0., 1.])), ('HT6W48', ': ', array([ 0, 1, 0, 67]), ' ', array([ 0. , 0.01470588, 0. , 0.98529412]), …	10110010	0.997899	0.346378	1	1
503	12	74655672	TAGxAAT	T	C	[('HT6W37', ': ', array([ 0, 56, 0, 0]), ' ', array([ 0., 1., 0., 0.]), ' ', array([ 0., 1., 0., 0.])), ('HT6W45', ': ', array([ 0, 54, 0, 0]), ' ', array([ 0., 1., 0., 0.]), ' ', array([ 0., 1., 0., 0.])), ('HT6W47', ': ', array([ 0, 60, 0, 0]), ' ', array([ 0., 1., 0., 0.]), ' ', array([ 0., 1., 0., 0.])), ('HT6W48', ': ', array([ 0, 53, 0, 0]), ' ', array([ 0., 1., 0., 0.]), ' ', array([ 0., 1…	10110010	1	0.319413	1	1
504	12	82890802	TTCxATT	C	A	[('HT6W37', ': ', array([ 0, 0, 48, 0]), ' ', array([ 0., 0., 1., 0.]), ' ', array([ 0., 0., 1., 0.])), ('HT6W45', ': ', array([ 0, 0, 66, 0]), ' ', array([ 0., 0., 1., 0.]), ' ', array([ 0., 0., 1., 0.])), ('HT6W47', ': ', array([ 0, 0, 65, 0]), ' ', array([ 0., 0., 1., 0.]), ' ', array([ 0., 0., 1., 0.])), ('HT6W48', ': ', array([ 0, 0, 67, 0]), ' ', array([ 0., 0., 1., 0.]), ' ', array([ 0., 0…	10110010	0.994426	0.354229	1	1
505	12	82905734	TTTxAAA	T	A	[('HT6W37', ': ', array([ 0, 55, 0, 0]), ' ', array([ 0., 1., 0., 0.]), ' ', array([ 0., 1., 0., 0.])), ('HT6W45', ': ', array([ 0, 59, 0, 0]), ' ', array([ 0., 1., 0., 0.]), ' ', array([ 0., 1., 0., 0.])), ('HT6W47', ': ', array([ 0, 40, 0, 0]), ' ', array([ 0., 1., 0., 0.]), ' ', array([ 0., 1., 0., 0.])), ('HT6W48', ': ', array([ 0, 69, 0, 1]), ' ', array([ 0. , 0.98571429, 0. , 0.01428571]), …	10110010	0.997959	0.364812	1	1
506	12	85117833	AAGxATG	A	G	[('HT6W37', ': ', array([69, 0, 0, 0]), ' ', array([ 1., 0., 0., 0.]), ' ', array([ 1., 0., 0., 0.])), ('HT6W45', ': ', array([62, 1, 0, 0]), ' ', array([ 0.98412698, 0.01587302, 0. , 0. ]), ' ', array([ 1., 0., 0., 0.])), ('HT6W47', ': ', array([69, 0, 0, 0]), ' ', array([ 1., 0., 0., 0.]), ' ', array([ 1., 0., 0., 0.])), ('HT6W48', ': ', array([68, 1, 0, 0]), ' ', array([ 0.98550725, 0.01449275…	10110010	0.995918	0.298371	1	1
507	12	86734290	AAAxATT	G	T	[('HT6W37', ': ', array([ 0, 0, 0, 53]), ' ', array([ 0., 0., 0., 1.]), ' ', array([ 0., 0., 0., 1.])), ('HT6W45', ': ', array([ 0, 0, 0, 53]), ' ', array([ 0., 0., 0., 1.]), ' ', array([ 0., 0., 0., 1.])), ('HT6W47', ': ', array([ 1, 0, 0, 74]), ' ', array([ 0.01333333, 0. , 0. , 0.98666667]), ' ', array([ 0., 0., 0., 1.])), ('HT6W48', ': ', array([ 1, 0, 0, 65]), ' ', array([ 0.01515152, 0. , 0…	10110010	0.991763	0.292167	1	1
508	12	86896420	TCAxATA	T	C	[('HT6W37', ': ', array([ 0, 45, 1, 0]), ' ', array([ 0. , 0.97826087, 0.02173913, 0. ]), ' ', array([ 0., 1., 0., 0.])), ('HT6W45', ': ', array([ 0, 64, 0, 0]), ' ', array([ 0., 1., 0., 0.]), ' ', array([ 0., 1., 0., 0.])), ('HT6W47', ': ', array([ 0, 61, 0, 1]), ' ', array([ 0. , 0.98387097, 0. , 0.01612903]), ' ', array([ 0., 1., 0., 0.])), ('HT6W48', ': ', array([ 0, 63, 0, 0]), ' ', array([ …	100010	0.993428	0.294574	1	1
509	12	94245770	ATTxGGT	C	T	[('HT6W37', ': ', array([ 1, 0, 50, 0]), ' ', array([ 0.01960784, 0. , 0.98039216, 0. ]), ' ', array([ 0., 0., 1., 0.])), ('HT6W45', ': ', array([ 0, 0, 48, 0]), ' ', array([ 0., 0., 1., 0.]), ' ', array([ 0., 0., 1., 0.])), ('HT6W47', ': ', array([ 0, 1, 54, 0]), ' ', array([ 0. , 0.01818182, 0.98181818, 0. ]), ' ', array([ 0., 0., 1., 0.])), ('HT6W48', ': ', array([ 0, 0, 58, 0]), ' ', array([ …	10110010	0.994601	0.365973	1	1
510	12	94901207	TGAxATT	T	C	[('HT6W37', ': ', array([ 0, 56, 0, 1]), ' ', array([ 0. , 0.98245614, 0. , 0.01754386]), ' ', array([ 0., 1., 0., 0.])), ('HT6W45', ': ', array([ 0, 53, 0, 0]), ' ', array([ 0., 1., 0., 0.]), ' ', array([ 0., 1., 0., 0.])), ('HT6W47', ': ', array([ 0, 64, 0, 0]), ' ', array([ 0., 1., 0., 0.]), ' ', array([ 0., 1., 0., 0.])), ('HT6W48', ': ', array([ 0, 73, 1, 1]), ' ', array([ 0. , 0.97333333, 0…	100010	0.98359	0.351429	1	1
511	12	97286675	ACTxTTT	C	A	[('HT6W37', ': ', array([ 0, 0, 55, 0]), ' ', array([ 0., 0., 1., 0.]), ' ', array([ 0., 0., 1., 0.])), ('HT6W45', ': ', array([ 0, 0, 53, 0]), ' ', array([ 0., 0., 1., 0.]), ' ', array([ 0., 0., 1., 0.])), ('HT6W47', ': ', array([ 0, 0, 46, 0]), ' ', array([ 0., 0., 1., 0.]), ' ', array([ 0., 0., 1., 0.])), ('HT6W48', ': ', array([ 0, 0, 50, 0]), ' ', array([ 0., 0., 1., 0.]), ' ', array([ 0., 0…	10110010	0.994898	0.274163	1	1
512	12	101375400	AAAxGTA	A	C	[('HT6W37', ': ', array([62, 0, 1, 1]), ' ', array([ 0.96875 , 0. , 0.015625, 0.015625]), ' ', array([ 1., 0., 0., 0.])), ('HT6W45', ': ', array([53, 0, 0, 0]), ' ', array([ 1., 0., 0., 0.]), ' ', array([ 1., 0., 0., 0.])), ('HT6W47', ': ', array([55, 0, 0, 0]), ' ', array([ 1., 0., 0., 0.]), ' ', array([ 1., 0., 0., 0.])), ('HT6W48', ': ', array([67, 1, 0, 1]), ' ', array([ 0.97101449, 0.0144927…	10110010	0.983753	0.331908	1	1
513	12	101480839	AACxTCT	C	A	[('HT6W37', ': ', array([ 0, 1, 63, 0]), ' ', array([ 0. , 0.015625, 0.984375, 0. ]), ' ', array([ 0., 0., 1., 0.])), ('HT6W45', ': ', array([ 0, 0, 59, 0]), ' ', array([ 0., 0., 1., 0.]), ' ', array([ 0., 0., 1., 0.])), ('HT6W47', ': ', array([ 0, 0, 63, 0]), ' ', array([ 0., 0., 1., 0.]), ' ', array([ 0., 0., 1., 0.])), ('HT6W48', ': ', array([ 0, 0, 71, 0]), ' ', array([ 0., 0., 1., 0.]), ' ',…	10110010	0.989871	0.315729	1	1
514	12	102472586	TAAxATG	G	T	[('HT6W37', ': ', array([ 0, 0, 0, 69]), ' ', array([ 0., 0., 0., 1.]), ' ', array([ 0., 0., 0., 1.])), ('HT6W45', ': ', array([ 0, 0, 1, 60]), ' ', array([ 0. , 0. , 0.01639344, 0.98360656]), ' ', array([ 0., 0., 0., 1.])), ('HT6W47', ': ', array([ 0, 0, 0, 89]), ' ', array([ 0., 0., 0., 1.]), ' ', array([ 0., 0., 0., 1.])), ('HT6W48', ': ', array([ 1, 0, 0, 78]), ' ', array([ 0.01265823, 0. , 0…	10110010	0.998192	0.337403	1	1
515	12	103534944	GTGxCCT	A	G	[('HT6W37', ': ', array([68, 0, 0, 0]), ' ', array([ 1., 0., 0., 0.]), ' ', array([ 1., 0., 0., 0.])), ('HT6W45', ': ', array([50, 0, 2, 0]), ' ', array([ 0.96153846, 0. , 0.03846154, 0. ]), ' ', array([ 1., 0., 0., 0.])), ('HT6W47', ': ', array([53, 0, 2, 0]), ' ', array([ 0.96363636, 0. , 0.03636364, 0. ]), ' ', array([ 1., 0., 0., 0.])), ('HT6W48', ': ', array([65, 0, 0, 0]), ' ', array([ 1., …	100010	0.992024	0.321394	1	1
516	12	103778288	AATxTTT	C	A	[('HT6W37', ': ', array([ 0, 0, 52, 1]), ' ', array([ 0. , 0. , 0.98113208, 0.01886792]), ' ', array([ 0., 0., 1., 0.])), ('HT6W45', ': ', array([ 0, 0, 59, 0]), ' ', array([ 0., 0., 1., 0.]), ' ', array([ 0., 0., 1., 0.])), ('HT6W47', ': ', array([ 0, 0, 72, 0]), ' ', array([ 0., 0., 1., 0.]), ' ', array([ 0., 0., 1., 0.])), ('HT6W48', ': ', array([ 1, 0, 64, 0]), ' ', array([ 0.01538462, 0. , 0…	100010	0.992921	0.358142	1	1
517	12	104039839	AGCxACT	T	G	[('HT6W37', ': ', array([ 0, 71, 0, 1]), ' ', array([ 0. , 0.98611111, 0. , 0.01388889]), ' ', array([ 0., 1., 0., 0.])), ('HT6W45', ': ', array([ 0, 50, 0, 0]), ' ', array([ 0., 1., 0., 0.]), ' ', array([ 0., 1., 0., 0.])), ('HT6W47', ': ', array([ 0, 60, 1, 0]), ' ', array([ 0. , 0.98360656, 0.01639344, 0. ]), ' ', array([ 0., 1., 0., 0.])), ('HT6W48', ': ', array([ 0, 78, 0, 0]), ' ', array([ …	100010	0.994686	0.331892	1	1
518	12	108586644	CTTxTCA	C	A	[('HT6W37', ': ', array([ 0, 0, 48, 0]), ' ', array([ 0., 0., 1., 0.]), ' ', array([ 0., 0., 1., 0.])), ('HT6W45', ': ', array([ 1, 0, 49, 0]), ' ', array([ 0.02, 0. , 0.98, 0. ]), ' ', array([ 0., 0., 1., 0.])), ('HT6W47', ': ', array([ 0, 0, 53, 0]), ' ', array([ 0., 0., 1., 0.]), ' ', array([ 0., 0., 1., 0.])), ('HT6W48', ': ', array([ 0, 0, 68, 0]), ' ', array([ 0., 0., 1., 0.]), ' ', array([…	10110010	0.992594	0.282494	1	1
519	12	111676482	ACTxCAT	A	G	[('HT6W37', ': ', array([57, 0, 1, 0]), ' ', array([ 0.98275862, 0. , 0.01724138, 0. ]), ' ', array([ 1., 0., 0., 0.])), ('HT6W45', ': ', array([58, 0, 0, 1]), ' ', array([ 0.98305085, 0. , 0. , 0.01694915]), ' ', array([ 1., 0., 0., 0.])), ('HT6W47', ': ', array([62, 0, 0, 0]), ' ', array([ 1., 0., 0., 0.]), ' ', array([ 1., 0., 0., 0.])), ('HT6W48', ': ', array([67, 0, 0, 0]), ' ', array([ 1., …	10110010	0.995606	0.311667	1	1
520	12	112406460	ATTxTAT	C	A	[('HT6W37', ': ', array([ 0, 0, 64, 0]), ' ', array([ 0., 0., 1., 0.]), ' ', array([ 0., 0., 1., 0.])), ('HT6W45', ': ', array([ 0, 0, 64, 0]), ' ', array([ 0., 0., 1., 0.]), ' ', array([ 0., 0., 1., 0.])), ('HT6W47', ': ', array([ 0, 0, 65, 0]), ' ', array([ 0., 0., 1., 0.]), ' ', array([ 0., 0., 1., 0.])), ('HT6W48', ': ', array([ 0, 0, 52, 0]), ' ', array([ 0., 0., 1., 0.]), ' ', array([ 0., 0…	10110010	0.995906	0.313244	1	1
521	12	113645621	CTGxTCC	C	T	[('HT6W37', ': ', array([ 0, 0, 51, 0]), ' ', array([ 0., 0., 1., 0.]), ' ', array([ 0., 0., 1., 0.])), ('HT6W45', ': ', array([ 0, 0, 45, 0]), ' ', array([ 0., 0., 1., 0.]), ' ', array([ 0., 0., 1., 0.])), ('HT6W47', ': ', array([ 0, 0, 54, 0]), ' ', array([ 0., 0., 1., 0.]), ' ', array([ 0., 0., 1., 0.])), ('HT6W48', ': ', array([ 0, 0, 43, 0]), ' ', array([ 0., 0., 1., 0.]), ' ', array([ 0., 0…	10110010	1	0.329196	1	1
522	12	114986737	CATxCAA	C	A	[('HT6W37', ': ', array([ 0, 0, 70, 0]), ' ', array([ 0., 0., 1., 0.]), ' ', array([ 0., 0., 1., 0.])), ('HT6W45', ': ', array([ 0, 0, 69, 0]), ' ', array([ 0., 0., 1., 0.]), ' ', array([ 0., 0., 1., 0.])), ('HT6W47', ': ', array([ 0, 0, 50, 0]), ' ', array([ 0., 0., 1., 0.]), ' ', array([ 0., 0., 1., 0.])), ('HT6W48', ': ', array([ 0, 0, 69, 0]), ' ', array([ 0., 0., 1., 0.]), ' ', array([ 0., 0…	10110010	1	0.301793	1	1
523	12	121789579	TTAxTGT	C	T	[('HT6W37', ': ', array([ 1, 0, 58, 1]), ' ', array([ 0.01666667, 0. , 0.96666667, 0.01666667]), ' ', array([ 0., 0., 1., 0.])), ('HT6W45', ': ', array([ 0, 0, 60, 0]), ' ', array([ 0., 0., 1., 0.]), ' ', array([ 0., 0., 1., 0.])), ('HT6W47', ': ', array([ 0, 0, 48, 0]), ' ', array([ 0., 0., 1., 0.]), ' ', array([ 0., 0., 1., 0.])), ('HT6W48', ': ', array([ 0, 0, 57, 0]), ' ', array([ 0., 0., 1.,…	10110010	0.988124	0.331762	1	1
524	12	122636350	CTCxCAG	G	A	[('HT6W37', ': ', array([ 0, 0, 0, 56]), ' ', array([ 0., 0., 0., 1.]), ' ', array([ 0., 0., 0., 1.])), ('HT6W45', ': ', array([ 0, 0, 0, 46]), ' ', array([ 0., 0., 0., 1.]), ' ', array([ 0., 0., 0., 1.])), ('HT6W47', ': ', array([ 0, 0, 0, 55]), ' ', array([ 0., 0., 0., 1.]), ' ', array([ 0., 0., 0., 1.])), ('HT6W48', ': ', array([ 0, 0, 0, 59]), ' ', array([ 0., 0., 0., 1.]), ' ', array([ 0., 0…	10110010	0.998043	0.293025	1	1
525	12	126527585	TCAxTTA	T	G	[('HT6W37', ': ', array([ 0, 56, 0, 0]), ' ', array([ 0., 1., 0., 0.]), ' ', array([ 0., 1., 0., 0.])), ('HT6W45', ': ', array([ 0, 65, 0, 0]), ' ', array([ 0., 1., 0., 0.]), ' ', array([ 0., 1., 0., 0.])), ('HT6W47', ': ', array([ 0, 84, 0, 1]), ' ', array([ 0. , 0.98823529, 0. , 0.01176471]), ' ', array([ 0., 1., 0., 0.])), ('HT6W48', ': ', array([ 0, 57, 0, 0]), ' ', array([ 0., 1., 0., 0.]), …	100010	0.994861	0.368782	1	1
526	12	127334955	GGAxCTC	G	A	[('HT6W37', ': ', array([ 0, 0, 0, 54]), ' ', array([ 0., 0., 0., 1.]), ' ', array([ 0., 0., 0., 1.])), ('HT6W45', ': ', array([ 0, 0, 0, 49]), ' ', array([ 0., 0., 0., 1.]), ' ', array([ 0., 0., 0., 1.])), ('HT6W47', ': ', array([ 0, 0, 0, 57]), ' ', array([ 0., 0., 0., 1.]), ' ', array([ 0., 0., 0., 1.])), ('HT6W48', ': ', array([ 0, 1, 0, 63]), ' ', array([ 0. , 0.015625, 0. , 0.984375]), ' ',…	10110010	0.995464	0.312152	1	1
527	12	132046671	AACxTTC	T	G	[('HT6W37', ': ', array([ 0, 57, 0, 0]), ' ', array([ 0., 1., 0., 0.]), ' ', array([ 0., 1., 0., 0.])), ('HT6W45', ': ', array([ 0, 43, 0, 0]), ' ', array([ 0., 1., 0., 0.]), ' ', array([ 0., 1., 0., 0.])), ('HT6W47', ': ', array([ 0, 60, 1, 1]), ' ', array([ 0. , 0.96774194, 0.01612903, 0.01612903]), ' ', array([ 0., 1., 0., 0.])), ('HT6W48', ': ', array([ 0, 57, 1, 1]), ' ', array([ 0. , 0.9661…	10110010	0.980329	0.346526	1	1
528	13	26934237	CAGxTTG	T	C	[('HT6W37', ': ', array([ 0, 43, 0, 0]), ' ', array([ 0., 1., 0., 0.]), ' ', array([ 0., 1., 0., 0.])), ('HT6W45', ': ', array([ 0, 33, 0, 0]), ' ', array([ 0., 1., 0., 0.]), ' ', array([ 0., 1., 0., 0.])), ('HT6W47', ': ', array([ 0, 46, 0, 0]), ' ', array([ 0., 1., 0., 0.]), ' ', array([ 0., 1., 0., 0.])), ('HT6W48', ': ', array([ 0, 46, 0, 0]), ' ', array([ 0., 1., 0., 0.]), ' ', array([ 0., 1…	100010	0.995498	0.419519	1	1
529	13	32995447	AAGxTAC	G	A	[('HT6W37', ': ', array([ 0, 0, 0, 47]), ' ', array([ 0., 0., 0., 1.]), ' ', array([ 0., 0., 0., 1.])), ('HT6W45', ': ', array([ 0, 0, 0, 40]), ' ', array([ 0., 0., 0., 1.]), ' ', array([ 0., 0., 0., 1.])), ('HT6W47', ': ', array([ 0, 0, 0, 57]), ' ', array([ 0., 0., 0., 1.]), ' ', array([ 0., 0., 0., 1.])), ('HT6W48', ': ', array([ 0, 0, 0, 39]), ' ', array([ 0., 0., 0., 1.]), ' ', array([ 0., 0…	10110010	1	0.440412	1	1
530	13	35208193	TTAxAAC	G	T	[('HT6W37', ': ', array([ 0, 0, 0, 31]), ' ', array([ 0., 0., 0., 1.]), ' ', array([ 0., 0., 0., 1.])), ('HT6W45', ': ', array([ 0, 0, 0, 29]), ' ', array([ 0., 0., 0., 1.]), ' ', array([ 0., 0., 0., 1.])), ('HT6W47', ': ', array([ 0, 1, 0, 39]), ' ', array([ 0. , 0.025, 0. , 0.975]), ' ', array([ 0., 0., 0., 1.])), ('HT6W48', ': ', array([ 0, 0, 0, 42]), ' ', array([ 0., 0., 0., 1.]), ' ', array…	10110010	0.996429	0.542782	1	1
531	13	36616957	AAAxAAT	G	T	[('HT6W37', ': ', array([ 0, 0, 0, 46]), ' ', array([ 0., 0., 0., 1.]), ' ', array([ 0., 0., 0., 1.])), ('HT6W45', ': ', array([ 0, 0, 0, 31]), ' ', array([ 0., 0., 0., 1.]), ' ', array([ 0., 0., 0., 1.])), ('HT6W47', ': ', array([ 0, 0, 0, 48]), ' ', array([ 0., 0., 0., 1.]), ' ', array([ 0., 0., 0., 1.])), ('HT6W48', ': ', array([ 1, 0, 0, 43]), ' ', array([ 0.02272727, 0. , 0. , 0.97727273]), …	100010	0.992534	0.507949	1	1
532	13	39220326	CATxTGA	T	C	[('HT6W37', ': ', array([ 0, 52, 0, 1]), ' ', array([ 0. , 0.98113208, 0. , 0.01886792]), ' ', array([ 0., 1., 0., 0.])), ('HT6W45', ': ', array([ 0, 40, 0, 0]), ' ', array([ 0., 1., 0., 0.]), ' ', array([ 0., 1., 0., 0.])), ('HT6W47', ': ', array([ 2, 40, 0, 0]), ' ', array([ 0.04761905, 0.95238095, 0. , 0. ]), ' ', array([ 0., 1., 0., 0.])), ('HT6W48', ': ', array([ 0, 57, 0, 0]), ' ', array([ …	10110010	0.988121	0.446715	1	1
533	13	49080965	AAAxACT	G	T	[('HT6W37', ': ', array([ 0, 0, 0, 35]), ' ', array([ 0., 0., 0., 1.]), ' ', array([ 0., 0., 0., 1.])), ('HT6W45', ': ', array([ 0, 0, 0, 30]), ' ', array([ 0., 0., 0., 1.]), ' ', array([ 0., 0., 0., 1.])), ('HT6W47', ': ', array([ 0, 0, 0, 43]), ' ', array([ 0., 0., 0., 1.]), ' ', array([ 0., 0., 0., 1.])), ('HT6W48', ': ', array([ 0, 0, 0, 32]), ' ', array([ 0., 0., 0., 1.]), ' ', array([ 0., 0…	10110010	1	0.458558	1	1
534	13	51587527	ACAxTAT	G	T	[('HT6W37', ': ', array([ 0, 0, 0, 30]), ' ', array([ 0., 0., 0., 1.]), ' ', array([ 0., 0., 0., 1.])), ('HT6W45', ': ', array([ 0, 0, 0, 34]), ' ', array([ 0., 0., 0., 1.]), ' ', array([ 0., 0., 0., 1.])), ('HT6W47', ': ', array([ 0, 1, 0, 42]), ' ', array([ 0. , 0.02325581, 0. , 0.97674419]), ' ', array([ 0., 0., 0., 1.])), ('HT6W48', ': ', array([ 0, 0, 0, 41]), ' ', array([ 0., 0., 0., 1.]), …	10110010	0.996678	0.497141	1	1
535	13	54073313	AAAxATT	G	T	[('HT6W37', ': ', array([ 1, 0, 0, 36]), ' ', array([ 0.02702703, 0. , 0. , 0.97297297]), ' ', array([ 0., 0., 0., 1.])), ('HT6W45', ': ', array([ 0, 1, 0, 32]), ' ', array([ 0. , 0.03030303, 0. , 0.96969697]), ' ', array([ 0., 0., 0., 1.])), ('HT6W47', ': ', array([ 0, 0, 0, 41]), ' ', array([ 0., 0., 0., 1.]), ' ', array([ 0., 0., 0., 1.])), ('HT6W48', ': ', array([ 0, 1, 0, 43]), ' ', array([ …	10110010	0.989787	0.461699	1	1
536	13	54458731	ATAxAAT	G	T	[('HT6W37', ': ', array([ 0, 0, 0, 37]), ' ', array([ 0., 0., 0., 1.]), ' ', array([ 0., 0., 0., 1.])), ('HT6W45', ': ', array([ 0, 0, 0, 37]), ' ', array([ 0., 0., 0., 1.]), ' ', array([ 0., 0., 0., 1.])), ('HT6W47', ': ', array([ 0, 0, 0, 38]), ' ', array([ 0., 0., 0., 1.]), ' ', array([ 0., 0., 0., 1.])), ('HT6W48', ': ', array([ 0, 0, 0, 42]), ' ', array([ 0., 0., 0., 1.]), ' ', array([ 0., 0…	10110010	0.988891	0.50068	1	1
537	13	58402236	AACxTAT	T	G	[('HT6W37', ': ', array([ 0, 33, 0, 0]), ' ', array([ 0., 1., 0., 0.]), ' ', array([ 0., 1., 0., 0.])), ('HT6W45', ': ', array([ 0, 25, 0, 0]), ' ', array([ 0., 1., 0., 0.]), ' ', array([ 0., 1., 0., 0.])), ('HT6W47', ': ', array([ 0, 50, 0, 0]), ' ', array([ 0., 1., 0., 0.]), ' ', array([ 0., 1., 0., 0.])), ('HT6W48', ': ', array([ 0, 32, 0, 0]), ' ', array([ 0., 1., 0., 0.]), ' ', array([ 0., 1…	100010	0.994444	0.548468	1	1
538	13	59351343	CTCxTTT	C	A	[('HT6W37', ': ', array([ 0, 0, 42, 0]), ' ', array([ 0., 0., 1., 0.]), ' ', array([ 0., 0., 1., 0.])), ('HT6W45', ': ', array([ 0, 1, 34, 0]), ' ', array([ 0. , 0.02857143, 0.97142857, 0. ]), ' ', array([ 0., 0., 1., 0.])), ('HT6W47', ': ', array([ 1, 0, 30, 0]), ' ', array([ 0.03225806, 0. , 0.96774194, 0. ]), ' ', array([ 0., 0., 1., 0.])), ('HT6W48', ': ', array([ 0, 0, 30, 0]), ' ', array([ …	100010	0.993638	0.483333	1	1
539	13	61231219	TACxAGT	G	A	[('HT6W37', ': ', array([ 0, 0, 0, 50]), ' ', array([ 0., 0., 0., 1.]), ' ', array([ 0., 0., 0., 1.])), ('HT6W45', ': ', array([ 0, 0, 0, 33]), ' ', array([ 0., 0., 0., 1.]), ' ', array([ 0., 0., 0., 1.])), ('HT6W47', ': ', array([ 0, 0, 0, 46]), ' ', array([ 0., 0., 0., 1.]), ' ', array([ 0., 0., 0., 1.])), ('HT6W48', ': ', array([ 0, 0, 0, 43]), ' ', array([ 0., 0., 0., 1.]), ' ', array([ 0., 0…	10110010	0.996516	0.533193	1	1
540	13	65138054	TTTxTAC	C	A	[('HT6W37', ': ', array([ 0, 0, 32, 0]), ' ', array([ 0., 0., 1., 0.]), ' ', array([ 0., 0., 1., 0.])), ('HT6W45', ': ', array([ 0, 1, 23, 0]), ' ', array([ 0. , 0.04166667, 0.95833333, 0. ]), ' ', array([ 0., 0., 1., 0.])), ('HT6W47', ': ', array([ 0, 0, 40, 0]), ' ', array([ 0., 0., 1., 0.]), ' ', array([ 0., 0., 1., 0.])), ('HT6W48', ': ', array([ 0, 0, 34, 0]), ' ', array([ 0., 0., 1., 0.]), …	100010	0.99729	0.532468	1	1
541	13	70075992	AGAxCCA	A	G	[('HT6W37', ': ', array([39, 0, 0, 0]), ' ', array([ 1., 0., 0., 0.]), ' ', array([ 1., 0., 0., 0.])), ('HT6W45', ': ', array([35, 0, 0, 0]), ' ', array([ 1., 0., 0., 0.]), ' ', array([ 1., 0., 0., 0.])), ('HT6W47', ': ', array([49, 0, 1, 1]), ' ', array([ 0.96078431, 0. , 0.01960784, 0.01960784]), ' ', array([ 1., 0., 0., 0.])), ('HT6W48', ': ', array([30, 0, 0, 0]), ' ', array([ 1., 0., 0., 0.]…	100010	0.995643	0.513091	1	1
542	13	70670547	TATxGCT	A	G	[('HT6W37', ': ', array([36, 1, 1, 0]), ' ', array([ 0.94736842, 0.02631579, 0.02631579, 0. ]), ' ', array([ 1., 0., 0., 0.])), ('HT6W45', ': ', array([34, 0, 0, 0]), ' ', array([ 1., 0., 0., 0.]), ' ', array([ 1., 0., 0., 0.])), ('HT6W47', ': ', array([41, 0, 0, 0]), ' ', array([ 1., 0., 0., 0.]), ' ', array([ 1., 0., 0., 0.])), ('HT6W48', ': ', array([43, 0, 0, 0]), ' ', array([ 1., 0., 0., 0.]…	100010	0.985432	0.423669	1	1
543	13	74947617	AAAxACT	G	T	[('HT6W37', ': ', array([ 0, 0, 0, 12]), ' ', array([ 0., 0., 0., 1.]), ' ', array([ 0., 0., 0., 1.])), ('HT6W45', ': ', array([ 1, 0, 0, 19]), ' ', array([ 0.05, 0. , 0. , 0.95]), ' ', array([ 0., 0., 0., 1.])), ('HT6W47', ': ', array([ 0, 0, 0, 29]), ' ', array([ 0., 0., 0., 1.]), ' ', array([ 0., 0., 0., 1.])), ('HT6W48', ': ', array([ 0, 0, 0, 18]), ' ', array([ 0., 0., 0., 1.]), ' ', array([…	10110010	0.992857	1	1	1
544	13	86592544	AATxTAT	C	A	[('HT6W37', ': ', array([ 1, 0, 16, 0]), ' ', array([ 0.05882353, 0. , 0.94117647, 0. ]), ' ', array([ 0., 0., 1., 0.])), ('HT6W45', ': ', array([ 0, 0, 18, 0]), ' ', array([ 0., 0., 1., 0.]), ' ', array([ 0., 0., 1., 0.])), ('HT6W47', ': ', array([ 0, 0, 20, 0]), ' ', array([ 0., 0., 1., 0.]), ' ', array([ 0., 0., 1., 0.])), ('HT6W48', ': ', array([ 0, 0, 16, 0]), ' ', array([ 0., 0., 1., 0.]), …	100010	0.976093	0.96875	1	1
545	13	87952254	TATxTGT	C	T	[('HT6W37', ': ', array([ 0, 0, 23, 0]), ' ', array([ 0., 0., 1., 0.]), ' ', array([ 0., 0., 1., 0.])), ('HT6W45', ': ', array([ 0, 0, 19, 0]), ' ', array([ 0., 0., 1., 0.]), ' ', array([ 0., 0., 1., 0.])), ('HT6W47', ': ', array([ 0, 0, 19, 0]), ' ', array([ 0., 0., 1., 0.]), ' ', array([ 0., 0., 1., 0.])), ('HT6W48', ': ', array([ 0, 0, 22, 0]), ' ', array([ 0., 0., 1., 0.]), ' ', array([ 0., 0…	100010	1	1	1	1
546	13	88930586	CCTxCAT	T	C	[('HT6W37', ': ', array([ 0, 20, 0, 0]), ' ', array([ 0., 1., 0., 0.]), ' ', array([ 0., 1., 0., 0.])), ('HT6W45', ': ', array([ 0, 16, 0, 0]), ' ', array([ 0., 1., 0., 0.]), ' ', array([ 0., 1., 0., 0.])), ('HT6W47', ': ', array([ 0, 20, 0, 0]), ' ', array([ 0., 1., 0., 0.]), ' ', array([ 0., 1., 0., 0.])), ('HT6W48', ': ', array([ 0, 22, 0, 0]), ' ', array([ 0., 1., 0., 0.]), ' ', array([ 0., 1…	10110010	0.993197	1	1	1
547	13	93998842	TCTxTGT	C	A	[('HT6W37', ': ', array([ 0, 0, 13, 0]), ' ', array([ 0., 0., 1., 0.]), ' ', array([ 0., 0., 1., 0.])), ('HT6W45', ': ', array([ 0, 0, 21, 0]), ' ', array([ 0., 0., 1., 0.]), ' ', array([ 0., 0., 1., 0.])), ('HT6W47', ': ', array([ 0, 0, 26, 0]), ' ', array([ 0., 0., 1., 0.]), ' ', array([ 0., 0., 1., 0.])), ('HT6W48', ': ', array([ 1, 0, 22, 0]), ' ', array([ 0.04347826, 0. , 0.95652174, 0. ]), …	100010	0.995169	1	1	1
548	13	96151278	AATxTTC	T	G	[('HT6W37', ': ', array([ 0, 16, 0, 0]), ' ', array([ 0., 1., 0., 0.]), ' ', array([ 0., 1., 0., 0.])), ('HT6W45', ': ', array([ 0, 30, 0, 1]), ' ', array([ 0. , 0.96774194, 0. , 0.03225806]), ' ', array([ 0., 1., 0., 0.])), ('HT6W47', ': ', array([ 0, 26, 0, 0]), ' ', array([ 0., 1., 0., 0.]), ' ', array([ 0., 1., 0., 0.])), ('HT6W48', ': ', array([ 0, 31, 0, 0]), ' ', array([ 0., 1., 0., 0.]), …	100010	1	1	1	1
549	13	96640419	AATxGAA	C	T	[('HT6W37', ': ', array([ 0, 0, 21, 0]), ' ', array([ 0., 0., 1., 0.]), ' ', array([ 0., 0., 1., 0.])), ('HT6W45', ': ', array([ 0, 0, 23, 0]), ' ', array([ 0., 0., 1., 0.]), ' ', array([ 0., 0., 1., 0.])), ('HT6W47', ': ', array([ 0, 0, 12, 0]), ' ', array([ 0., 0., 1., 0.]), ' ', array([ 0., 0., 1., 0.])), ('HT6W48', ': ', array([ 0, 0, 10, 0]), ' ', array([ 0., 0., 1., 0.]), ' ', array([ 0., 0…	100010	0.994444	1	1	1
550	13	106953655	CTAxATA	A	C	[('HT6W37', ': ', array([13, 0, 0, 0]), ' ', array([ 1., 0., 0., 0.]), ' ', array([ 1., 0., 0., 0.])), ('HT6W45', ': ', array([23, 0, 0, 0]), ' ', array([ 1., 0., 0., 0.]), ' ', array([ 1., 0., 0., 0.])), ('HT6W47', ': ', array([28, 0, 0, 0]), ' ', array([ 1., 0., 0., 0.]), ' ', array([ 1., 0., 0., 0.])), ('HT6W48', ': ', array([21, 0, 0, 0]), ' ', array([ 1., 0., 0., 0.]), ' ', array([ 1., 0., 0…	10110010	1	1	1	1
551	13	107760638	ATTxTTT	T	G	[('HT6W37', ': ', array([ 0, 20, 0, 0]), ' ', array([ 0., 1., 0., 0.]), ' ', array([ 0., 1., 0., 0.])), ('HT6W45', ': ', array([ 0, 17, 0, 0]), ' ', array([ 0., 1., 0., 0.]), ' ', array([ 0., 1., 0., 0.])), ('HT6W47', ': ', array([ 0, 20, 0, 0]), ' ', array([ 0., 1., 0., 0.]), ' ', array([ 0., 1., 0., 0.])), ('HT6W48', ': ', array([ 0, 21, 1, 0]), ' ', array([ 0. , 0.95454545, 0.04545455, 0. ]), …	100010	0.990119	0.981481	1	1
552	13	109861625	GAAxCAC	G	A	[('HT6W37', ': ', array([ 0, 0, 1, 21]), ' ', array([ 0. , 0. , 0.04545455, 0.95454545]), ' ', array([ 0., 0., 0., 1.])), ('HT6W45', ': ', array([ 0, 0, 0, 17]), ' ', array([ 0., 0., 0., 1.]), ' ', array([ 0., 0., 0., 1.])), ('HT6W47', ': ', array([ 0, 0, 0, 14]), ' ', array([ 0., 0., 0., 1.]), ' ', array([ 0., 0., 0., 1.])), ('HT6W48', ': ', array([ 0, 0, 0, 22]), ' ', array([ 0., 0., 0., 1.]), …	10110010	0.993506	0.975	1	1
553	14	19012400	AAAxGAA	G	T	[('HT6W37', ': ', array([ 1, 0, 0, 108]), ' ', array([ 0.00917431, 0. , 0. , 0.99082569]), ' ', array([ 0., 0., 0., 1.])), ('HT6W45', ': ', array([ 0, 2, 0, 113]), ' ', array([ 0. , 0.0173913, 0. , 0.9826087]), ' ', array([ 0., 0., 0., 1.])), ('HT6W47', ': ', array([ 2, 0, 0, 129]), ' ', array([ 0.01526718, 0. , 0. , 0.98473282]), ' ', array([ 0., 0., 0., 1.])), ('HT6W48', ': ', array([ 1, 3, 0, …	100010	0.985515	0.148148	1	1
554	14	20145869	AAAxTCC	T	G	[('HT6W37', ': ', array([ 0, 86, 0, 0]), ' ', array([ 0., 1., 0., 0.]), ' ', array([ 0., 1., 0., 0.])), ('HT6W45', ': ', array([ 1, 93, 0, 1]), ' ', array([ 0.01052632, 0.97894737, 0. , 0.01052632]), ' ', array([ 0., 1., 0., 0.])), ('HT6W47', ': ', array([ 0, 121, 1, 0]), ' ', array([ 0. , 0.99180328, 0.00819672, 0. ]), ' ', array([ 0., 1., 0., 0.])), ('HT6W48', ': ', array([ 0, 118, 0, 0]), ' ',…	100010	0.994216	0.162171	1	1
555	14	31377778	GAAxCTT	A	G	[('HT6W37', ': ', array([36, 0, 0, 1]), ' ', array([ 0.97297297, 0. , 0. , 0.02702703]), ' ', array([ 1., 0., 0., 0.])), ('HT6W45', ': ', array([28, 0, 0, 0]), ' ', array([ 1., 0., 0., 0.]), ' ', array([ 1., 0., 0., 0.])), ('HT6W47', ': ', array([48, 0, 1, 0]), ' ', array([ 0.97959184, 0. , 0.02040816, 0. ]), ' ', array([ 1., 0., 0., 0.])), ('HT6W48', ': ', array([37, 0, 0, 0]), ' ', array([ 1., …	10110010	0.976269	0.499567	1	1
556	14	39621963	ATGxCCA	T	C	[('HT6W37', ': ', array([ 0, 47, 0, 0]), ' ', array([ 0., 1., 0., 0.]), ' ', array([ 0., 1., 0., 0.])), ('HT6W45', ': ', array([ 0, 33, 0, 0]), ' ', array([ 0., 1., 0., 0.]), ' ', array([ 0., 1., 0., 0.])), ('HT6W47', ': ', array([ 0, 41, 0, 0]), ' ', array([ 0., 1., 0., 0.]), ' ', array([ 0., 1., 0., 0.])), ('HT6W48', ': ', array([ 0, 49, 0, 0]), ' ', array([ 0., 1., 0., 0.]), ' ', array([ 0., 1…	100010	0.995457	0.447291	1	1
557	14	42305846	TCAxATA	A	G	[('HT6W37', ': ', array([29, 0, 0, 0]), ' ', array([ 1., 0., 0., 0.]), ' ', array([ 1., 0., 0., 0.])), ('HT6W45', ': ', array([35, 0, 0, 0]), ' ', array([ 1., 0., 0., 0.]), ' ', array([ 1., 0., 0., 0.])), ('HT6W47', ': ', array([35, 0, 0, 0]), ' ', array([ 1., 0., 0., 0.]), ' ', array([ 1., 0., 0., 0.])), ('HT6W48', ': ', array([44, 0, 0, 0]), ' ', array([ 0.97777778, 0. , 0. , 0. ]), ' ', array(…	10110010	1	0.460988	1	1
558	14	43338838	TGGxGAA	G	T	[('HT6W37', ': ', array([ 0, 0, 0, 35]), ' ', array([ 0., 0., 0., 1.]), ' ', array([ 0., 0., 0., 1.])), ('HT6W45', ': ', array([ 0, 0, 0, 33]), ' ', array([ 0., 0., 0., 1.]), ' ', array([ 0., 0., 0., 1.])), ('HT6W47', ': ', array([ 0, 0, 0, 51]), ' ', array([ 0., 0., 0., 1.]), ' ', array([ 0., 0., 0., 1.])), ('HT6W48', ': ', array([ 0, 0, 0, 41]), ' ', array([ 0., 0., 0., 1.]), ' ', array([ 0., 0…	100010	0.985209	0.454545	1	1
559	14	52676221	ATTxGAT	C	T	[('HT6W37', ': ', array([ 0, 0, 42, 0]), ' ', array([ 0., 0., 1., 0.]), ' ', array([ 0., 0., 1., 0.])), ('HT6W45', ': ', array([ 0, 0, 27, 1]), ' ', array([ 0. , 0. , 0.96428571, 0.03571429]), ' ', array([ 0., 0., 1., 0.])), ('HT6W47', ': ', array([ 0, 0, 39, 0]), ' ', array([ 0., 0., 1., 0.]), ' ', array([ 0., 0., 1., 0.])), ('HT6W48', ': ', array([ 1, 0, 39, 0]), ' ', array([ 0.025, 0. , 0.975,…	100010	0.992323	0.518519	1	1
560	14	56757812	TTAxATA	A	C	[('HT6W37', ': ', array([36, 0, 0, 0]), ' ', array([ 1., 0., 0., 0.]), ' ', array([ 1., 0., 0., 0.])), ('HT6W45', ': ', array([29, 0, 1, 1]), ' ', array([ 0.93548387, 0. , 0.03225806, 0.03225806]), ' ', array([ 1., 0., 0., 0.])), ('HT6W47', ': ', array([41, 0, 0, 0]), ' ', array([ 1., 0., 0., 0.]), ' ', array([ 1., 0., 0., 0.])), ('HT6W48', ': ', array([43, 0, 0, 0]), ' ', array([ 1., 0., 0., 0.]…	100010	0.987955	0.501379	1	1
561	14	63173863	CTCxATA	G	A	[('HT6W37', ': ', array([ 0, 0, 0, 44]), ' ', array([ 0., 0., 0., 1.]), ' ', array([ 0., 0., 0., 1.])), ('HT6W45', ': ', array([ 0, 0, 0, 28]), ' ', array([ 0., 0., 0., 1.]), ' ', array([ 0., 0., 0., 1.])), ('HT6W47', ': ', array([ 0, 1, 0, 36]), ' ', array([ 0. , 0.02702703, 0. , 0.97297297]), ' ', array([ 0., 0., 0., 1.])), ('HT6W48', ': ', array([ 0, 0, 0, 55]), ' ', array([ 0., 0., 0., 1.]), …	10110010	0.992964	0.483815	1	1
562	14	64153051	CAAxATG	T	C	[('HT6W37', ': ', array([ 1, 45, 1, 0]), ' ', array([ 0.0212766 , 0.95744681, 0.0212766 , 0. ]), ' ', array([ 0., 1., 0., 0.])), ('HT6W45', ': ', array([ 0, 32, 1, 0]), ' ', array([ 0. , 0.96969697, 0.03030303, 0. ]), ' ', array([ 0., 1., 0., 0.])), ('HT6W47', ': ', array([ 0, 32, 0, 0]), ' ', array([ 0., 1., 0., 0.]), ' ', array([ 0., 1., 0., 0.])), ('HT6W48', ': ', array([ 0, 51, 0, 0]), ' ', a…	100010	0.98555	0.493302	1	1
563	14	66123656	AAAxTGG	C	T	[('HT6W37', ': ', array([ 0, 0, 45, 0]), ' ', array([ 0., 0., 1., 0.]), ' ', array([ 0., 0., 1., 0.])), ('HT6W45', ': ', array([ 0, 0, 26, 0]), ' ', array([ 0., 0., 1., 0.]), ' ', array([ 0., 0., 1., 0.])), ('HT6W47', ': ', array([ 0, 0, 42, 1]), ' ', array([ 0. , 0. , 0.97674419, 0.02325581]), ' ', array([ 0., 0., 1., 0.])), ('HT6W48', ': ', array([ 0, 0, 53, 0]), ' ', array([ 0., 0., 1., 0.]), …	10110010	0.993702	0.544414	1	1
564	14	68347425	CCTxTTC	C	G	[('HT6W37', ': ', array([ 0, 0, 43, 0]), ' ', array([ 0., 0., 1., 0.]), ' ', array([ 0., 0., 1., 0.])), ('HT6W45', ': ', array([ 0, 0, 42, 0]), ' ', array([ 0., 0., 1., 0.]), ' ', array([ 0., 0., 1., 0.])), ('HT6W47', ': ', array([ 0, 0, 46, 0]), ' ', array([ 0., 0., 1., 0.]), ' ', array([ 0., 0., 1., 0.])), ('HT6W48', ': ', array([ 0, 0, 38, 0]), ' ', array([ 0., 0., 1., 0.]), ' ', array([ 0., 0…	10110010	0.994431	0.475281	1	1
565	14	70499691	TTTxCCC	T	C	[('HT6W37', ': ', array([ 0, 43, 0, 0]), ' ', array([ 0., 1., 0., 0.]), ' ', array([ 0., 1., 0., 0.])), ('HT6W45', ': ', array([ 0, 30, 0, 1]), ' ', array([ 0. , 0.96774194, 0. , 0.03225806]), ' ', array([ 0., 1., 0., 0.])), ('HT6W47', ': ', array([ 0, 48, 0, 0]), ' ', array([ 0., 1., 0., 0.]), ' ', array([ 0., 1., 0., 0.])), ('HT6W48', ': ', array([ 0, 50, 0, 0]), ' ', array([ 0., 1., 0., 0.]), …	10110010	0.994505	0.506675	1	1
566	14	72162226	GAAxAGC	A	C	[('HT6W37', ': ', array([39, 0, 0, 0]), ' ', array([ 1., 0., 0., 0.]), ' ', array([ 1., 0., 0., 0.])), ('HT6W45', ': ', array([28, 0, 0, 0]), ' ', array([ 1., 0., 0., 0.]), ' ', array([ 1., 0., 0., 0.])), ('HT6W47', ': ', array([32, 0, 0, 0]), ' ', array([ 1., 0., 0., 0.]), ' ', array([ 1., 0., 0., 0.])), ('HT6W48', ': ', array([36, 0, 0, 0]), ' ', array([ 1., 0., 0., 0.]), ' ', array([ 1., 0., 0…	100010	0.997636	0.570415	1	1
567	14	81115184	TTTxTGT	T	C	[('HT6W37', ': ', array([ 0, 29, 1, 0]), ' ', array([ 0. , 0.96666667, 0.03333333, 0. ]), ' ', array([ 0., 1., 0., 0.])), ('HT6W45', ': ', array([ 0, 25, 0, 0]), ' ', array([ 0., 1., 0., 0.]), ' ', array([ 0., 1., 0., 0.])), ('HT6W47', ': ', array([ 0, 48, 0, 0]), ' ', array([ 0., 1., 0., 0.]), ' ', array([ 0., 1., 0., 0.])), ('HT6W48', ': ', array([ 0, 28, 0, 0]), ' ', array([ 0., 1., 0., 0.]), …	10110010	0.995238	0.472371	1	1
568	14	83962081	ATTxTAA	C	A	[('HT6W37', ': ', array([ 0, 0, 39, 0]), ' ', array([ 0., 0., 1., 0.]), ' ', array([ 0., 0., 1., 0.])), ('HT6W45', ': ', array([ 0, 1, 27, 0]), ' ', array([ 0. , 0.03571429, 0.96428571, 0. ]), ' ', array([ 0., 0., 1., 0.])), ('HT6W47', ': ', array([ 0, 1, 44, 0]), ' ', array([ 0. , 0.02222222, 0.97777778, 0. ]), ' ', array([ 0., 0., 1., 0.])), ('HT6W48', ': ', array([ 0, 0, 54, 0]), ' ', array([ …	100010	0.990653	0.486795	1	1
569	14	84002438	AAAxGGT	T	C	[('HT6W37', ': ', array([ 0, 41, 0, 0]), ' ', array([ 0., 1., 0., 0.]), ' ', array([ 0., 1., 0., 0.])), ('HT6W45', ': ', array([ 0, 36, 1, 0]), ' ', array([ 0. , 0.97297297, 0.02702703, 0. ]), ' ', array([ 0., 1., 0., 0.])), ('HT6W47', ': ', array([ 0, 46, 0, 0]), ' ', array([ 0., 1., 0., 0.]), ' ', array([ 0., 1., 0., 0.])), ('HT6W48', ': ', array([ 0, 48, 0, 0]), ' ', array([ 0., 1., 0., 0.]), …	10110010	0.997305	0.52935	1	1
570	14	90305286	ATGxGAA	T	G	[('HT6W37', ': ', array([ 0, 31, 0, 0]), ' ', array([ 0., 1., 0., 0.]), ' ', array([ 0., 1., 0., 0.])), ('HT6W45', ': ', array([ 0, 31, 0, 0]), ' ', array([ 0., 1., 0., 0.]), ' ', array([ 0., 1., 0., 0.])), ('HT6W47', ': ', array([ 0, 44, 0, 0]), ' ', array([ 0., 1., 0., 0.]), ' ', array([ 0., 1., 0., 0.])), ('HT6W48', ': ', array([ 0, 32, 0, 0]), ' ', array([ 0., 1., 0., 0.]), ' ', array([ 0., 1…	100010	0.983172	0.505527	1	1
571	14	93357187	TGCxTTA	T	C	[('HT6W37', ': ', array([ 0, 42, 0, 0]), ' ', array([ 0., 1., 0., 0.]), ' ', array([ 0., 1., 0., 0.])), ('HT6W45', ': ', array([ 0, 42, 0, 0]), ' ', array([ 0., 1., 0., 0.]), ' ', array([ 0., 1., 0., 0.])), ('HT6W47', ': ', array([ 0, 39, 0, 0]), ' ', array([ 0., 1., 0., 0.]), ' ', array([ 0., 1., 0., 0.])), ('HT6W48', ': ', array([ 0, 40, 0, 0]), ' ', array([ 0., 1., 0., 0.]), ' ', array([ 0., 1…	100010	1	0.506739	1	1
572	14	95398638	TCCxGAA	C	T	[('HT6W37', ': ', array([ 0, 0, 35, 0]), ' ', array([ 0., 0., 1., 0.]), ' ', array([ 0., 0., 1., 0.])), ('HT6W45', ': ', array([ 0, 0, 33, 0]), ' ', array([ 0., 0., 1., 0.]), ' ', array([ 0., 0., 1., 0.])), ('HT6W47', ': ', array([ 0, 0, 44, 0]), ' ', array([ 0., 0., 1., 0.]), ' ', array([ 0., 0., 1., 0.])), ('HT6W48', ': ', array([ 0, 0, 42, 0]), ' ', array([ 0., 0., 1., 0.]), ' ', array([ 0., 0…	100010	1	0.60092	1	1
573	14	96482447	AGTxTCA	T	C	[('HT6W37', ': ', array([ 0, 32, 0, 0]), ' ', array([ 0., 1., 0., 0.]), ' ', array([ 0., 1., 0., 0.])), ('HT6W45', ': ', array([ 0, 40, 0, 0]), ' ', array([ 0., 1., 0., 0.]), ' ', array([ 0., 1., 0., 0.])), ('HT6W47', ': ', array([ 0, 39, 0, 0]), ' ', array([ 0., 1., 0., 0.]), ' ', array([ 0., 1., 0., 0.])), ('HT6W48', ': ', array([ 0, 50, 0, 0]), ' ', array([ 0., 1., 0., 0.]), ' ', array([ 0., 1…	10110010	0.994505	0.518663	1	1
574	14	102264399	AGTxTAT	C	A	[('HT6W37', ': ', array([ 0, 1, 41, 0]), ' ', array([ 0. , 0.02380952, 0.97619048, 0. ]), ' ', array([ 0., 0., 1., 0.])), ('HT6W45', ': ', array([ 0, 0, 39, 0]), ' ', array([ 0., 0., 1., 0.]), ' ', array([ 0., 0., 1., 0.])), ('HT6W47', ': ', array([ 0, 0, 38, 1]), ' ', array([ 0. , 0. , 0.97435897, 0.02564103]), ' ', array([ 0., 0., 1., 0.])), ('HT6W48', ': ', array([ 0, 0, 42, 0]), ' ', array([ …	10110010	0.987044	0.588639	1	1
575	14	104432517	AAAxATT	A	C	[('HT6W37', ': ', array([41, 1, 0, 0]), ' ', array([ 0.97619048, 0.02380952, 0. , 0. ]), ' ', array([ 1., 0., 0., 0.])), ('HT6W45', ': ', array([25, 0, 1, 0]), ' ', array([ 0.96153846, 0. , 0.03846154, 0. ]), ' ', array([ 1., 0., 0., 0.])), ('HT6W47', ': ', array([36, 0, 0, 0]), ' ', array([ 1., 0., 0., 0.]), ' ', array([ 1., 0., 0., 0.])), ('HT6W48', ': ', array([43, 0, 1, 1]), ' ', array([ 0.95…	100010	0.980601	0.512821	1	1
576	14	105667505	ATCxTCC	C	A	[('HT6W37', ': ', array([ 0, 0, 43, 0]), ' ', array([ 0., 0., 1., 0.]), ' ', array([ 0., 0., 1., 0.])), ('HT6W45', ': ', array([ 0, 0, 36, 0]), ' ', array([ 0., 0., 1., 0.]), ' ', array([ 0., 0., 1., 0.])), ('HT6W47', ': ', array([ 0, 0, 39, 0]), ' ', array([ 0., 0., 1., 0.]), ' ', array([ 0., 0., 1., 0.])), ('HT6W48', ': ', array([ 1, 1, 48, 0]), ' ', array([ 0.02, 0.02, 0.96, 0. ]), ' ', array(…	100010	0.995556	0.489698	1	1
577	15	24598944	TATxATT	G	T	[('HT6W37', ': ', array([ 0, 0, 0, 52]), ' ', array([ 0., 0., 0., 1.]), ' ', array([ 0., 0., 0., 1.])), ('HT6W45', ': ', array([ 0, 1, 0, 38]), ' ', array([ 0. , 0.02564103, 0. , 0.97435897]), ' ', array([ 0., 0., 0., 1.])), ('HT6W47', ': ', array([ 0, 0, 0, 53]), ' ', array([ 0., 0., 0., 1.]), ' ', array([ 0., 0., 0., 1.])), ('HT6W48', ': ', array([ 0, 0, 0, 64]), ' ', array([ 0., 0., 0., 1.]), …	100010	1	0.366071	1	1
578	15	24714113	AGTxTAA	T	G	[('HT6W37', ': ', array([ 0, 50, 0, 0]), ' ', array([ 0., 1., 0., 0.]), ' ', array([ 0., 1., 0., 0.])), ('HT6W45', ': ', array([ 0, 50, 0, 0]), ' ', array([ 0., 1., 0., 0.]), ' ', array([ 0., 1., 0., 0.])), ('HT6W47', ': ', array([ 0, 66, 0, 0]), ' ', array([ 0., 1., 0., 0.]), ' ', array([ 0., 1., 0., 0.])), ('HT6W48', ': ', array([ 0, 60, 0, 0]), ' ', array([ 0., 1., 0., 0.]), ' ', array([ 0., 1…	10110010	0.997658	0.375269	1	1
579	15	26081042	CCAxCTC	G	T	[('HT6W37', ': ', array([ 0, 0, 0, 51]), ' ', array([ 0., 0., 0., 1.]), ' ', array([ 0., 0., 0., 1.])), ('HT6W45', ': ', array([ 0, 0, 0, 33]), ' ', array([ 0., 0., 0., 1.]), ' ', array([ 0., 0., 0., 1.])), ('HT6W47', ': ', array([ 0, 0, 0, 50]), ' ', array([ 0., 0., 0., 1.]), ' ', array([ 0., 0., 0., 1.])), ('HT6W48', ': ', array([ 0, 0, 0, 38]), ' ', array([ 0., 0., 0., 1.]), ' ', array([ 0., 0…	10110010	0.994286	0.438815	1	1
580	15	27498904	CCTxCAT	T	C	[('HT6W37', ': ', array([ 0, 46, 0, 0]), ' ', array([ 0., 1., 0., 0.]), ' ', array([ 0., 1., 0., 0.])), ('HT6W45', ': ', array([ 0, 41, 0, 0]), ' ', array([ 0., 1., 0., 0.]), ' ', array([ 0., 1., 0., 0.])), ('HT6W47', ': ', array([ 0, 40, 0, 0]), ' ', array([ 0., 1., 0., 0.]), ' ', array([ 0., 1., 0., 0.])), ('HT6W48', ': ', array([ 0, 37, 0, 0]), ' ', array([ 0., 1., 0., 0.]), ' ', array([ 0., 1…	100010	0.993192	0.5	1	1
581	15	32210100	GCAxCCC	G	T	[('HT6W37', ': ', array([ 0, 0, 0, 36]), ' ', array([ 0., 0., 0., 1.]), ' ', array([ 0., 0., 0., 1.])), ('HT6W45', ': ', array([ 0, 1, 0, 34]), ' ', array([ 0. , 0.02857143, 0. , 0.97142857]), ' ', array([ 0., 0., 0., 1.])), ('HT6W47', ': ', array([ 0, 0, 0, 35]), ' ', array([ 0., 0., 0., 1.]), ' ', array([ 0., 0., 0., 1.])), ('HT6W48', ': ', array([ 0, 0, 0, 35]), ' ', array([ 0., 0., 0., 1.]), …	10110010	1	0.542073	1	1
582	15	36915184	CAAxGTG	T	C	[('HT6W37', ': ', array([ 0, 39, 0, 0]), ' ', array([ 0., 1., 0., 0.]), ' ', array([ 0., 1., 0., 0.])), ('HT6W45', ': ', array([ 0, 36, 0, 0]), ' ', array([ 0., 1., 0., 0.]), ' ', array([ 0., 1., 0., 0.])), ('HT6W47', ': ', array([ 0, 43, 0, 0]), ' ', array([ 0., 1., 0., 0.]), ' ', array([ 0., 1., 0., 0.])), ('HT6W48', ': ', array([ 0, 46, 0, 0]), ' ', array([ 0., 1., 0., 0.]), ' ', array([ 0., 1…	10110010	0.993099	0.5426	1	1
583	15	37208134	TTGxCAA	T	C	[('HT6W37', ': ', array([ 0, 44, 0, 1]), ' ', array([ 0. , 0.97777778, 0. , 0.02222222]), ' ', array([ 0., 1., 0., 0.])), ('HT6W45', ': ', array([ 0, 44, 1, 0]), ' ', array([ 0. , 0.97777778, 0.02222222, 0. ]), ' ', array([ 0., 1., 0., 0.])), ('HT6W47', ': ', array([ 0, 44, 2, 0]), ' ', array([ 0. , 0.95652174, 0.04347826, 0. ]), ' ', array([ 0., 1., 0., 0.])), ('HT6W48', ': ', array([ 0, 41, 0, …	10110010	0.987509	0.392078	1	1
584	15	37820530	CTTxTCT	T	G	[('HT6W37', ': ', array([ 0, 37, 0, 0]), ' ', array([ 0., 1., 0., 0.]), ' ', array([ 0., 1., 0., 0.])), ('HT6W45', ': ', array([ 0, 47, 0, 1]), ' ', array([ 0. , 0.97916667, 0. , 0.02083333]), ' ', array([ 0., 1., 0., 0.])), ('HT6W47', ': ', array([ 0, 32, 0, 0]), ' ', array([ 0., 1., 0., 0.]), ' ', array([ 0., 1., 0., 0.])), ('HT6W48', ': ', array([ 0, 37, 0, 0]), ' ', array([ 0., 1., 0., 0.]), …	10110010	1	0.508615	1	1
585	15	53923092	CCAxATT	G	T	[('HT6W37', ': ', array([ 0, 0, 0, 39]), ' ', array([ 0., 0., 0., 1.]), ' ', array([ 0., 0., 0., 1.])), ('HT6W45', ': ', array([ 0, 0, 0, 33]), ' ', array([ 0., 0., 0., 1.]), ' ', array([ 0., 0., 0., 1.])), ('HT6W47', ': ', array([ 0, 0, 0, 37]), ' ', array([ 0., 0., 0., 1.]), ' ', array([ 0., 0., 0., 1.])), ('HT6W48', ': ', array([ 0, 1, 0, 39]), ' ', array([ 0. , 0.025, 0. , 0.975]), ' ', array…	10110010	0.989281	0.551223	1	1
586	15	54763282	GATxTTG	T	G	[('HT6W37', ': ', array([ 0, 44, 0, 0]), ' ', array([ 0., 1., 0., 0.]), ' ', array([ 0., 1., 0., 0.])), ('HT6W45', ': ', array([ 0, 35, 0, 0]), ' ', array([ 0., 1., 0., 0.]), ' ', array([ 0., 1., 0., 0.])), ('HT6W47', ': ', array([ 0, 41, 0, 0]), ' ', array([ 0., 1., 0., 0.]), ' ', array([ 0., 1., 0., 0.])), ('HT6W48', ': ', array([ 0, 48, 0, 0]), ' ', array([ 0., 1., 0., 0.]), ' ', array([ 0., 1…	10110010	1	0.494676	1	1
587	15	59888554	CAGxTAT	G	A	[('HT6W37', ': ', array([ 0, 0, 0, 38]), ' ', array([ 0., 0., 0., 1.]), ' ', array([ 0., 0., 0., 1.])), ('HT6W45', ': ', array([ 0, 0, 0, 51]), ' ', array([ 0., 0., 0., 1.]), ' ', array([ 0., 0., 0., 1.])), ('HT6W47', ': ', array([ 0, 0, 0, 35]), ' ', array([ 0., 0., 0., 1.]), ' ', array([ 0., 0., 0., 1.])), ('HT6W48', ': ', array([ 0, 0, 0, 54]), ' ', array([ 0., 0., 0., 1.]), ' ', array([ 0., 0…	10110010	0.992057	0.553954	1	1
588	15	62046088	CTCxTAT	C	A	[('HT6W37', ': ', array([ 0, 0, 33, 0]), ' ', array([ 0., 0., 1., 0.]), ' ', array([ 0., 0., 1., 0.])), ('HT6W45', ': ', array([ 0, 0, 32, 0]), ' ', array([ 0., 0., 1., 0.]), ' ', array([ 0., 0., 1., 0.])), ('HT6W47', ': ', array([ 0, 0, 31, 0]), ' ', array([ 0., 0., 1., 0.]), ' ', array([ 0., 0., 1., 0.])), ('HT6W48', ': ', array([ 0, 0, 48, 0]), ' ', array([ 0., 0., 1., 0.]), ' ', array([ 0., 0…	10110010	1	0.460884	1	1
589	15	62685064	AAAxTGA	G	A	[('HT6W37', ': ', array([ 0, 0, 0, 26]), ' ', array([ 0., 0., 0., 1.]), ' ', array([ 0., 0., 0., 1.])), ('HT6W45', ': ', array([ 0, 0, 0, 32]), ' ', array([ 0., 0., 0., 1.]), ' ', array([ 0., 0., 0., 1.])), ('HT6W47', ': ', array([ 0, 0, 0, 38]), ' ', array([ 0., 0., 0., 1.]), ' ', array([ 0., 0., 0., 1.])), ('HT6W48', ': ', array([ 0, 0, 0, 54]), ' ', array([ 0., 0., 0., 1.]), ' ', array([ 0., 0…	10110010	0.992476	0.501042	1	1
590	15	68562365	AAAxAGC	G	A	[('HT6W37', ': ', array([ 0, 0, 0, 45]), ' ', array([ 0., 0., 0., 1.]), ' ', array([ 0., 0., 0., 1.])), ('HT6W45', ': ', array([ 0, 0, 0, 38]), ' ', array([ 0., 0., 0., 1.]), ' ', array([ 0., 0., 0., 1.])), ('HT6W47', ': ', array([ 0, 0, 0, 39]), ' ', array([ 0., 0., 0., 1.]), ' ', array([ 0., 0., 0., 1.])), ('HT6W48', ': ', array([ 1, 0, 0, 51]), ' ', array([ 0.01923077, 0. , 0. , 0.98076923]), …	10110010	0.993171	0.546128	1	1
591	15	75969421	TCCxGCC	A	T	[('HT6W37', ': ', array([37, 0, 0, 0]), ' ', array([ 1., 0., 0., 0.]), ' ', array([ 1., 0., 0., 0.])), ('HT6W45', ': ', array([44, 0, 0, 0]), ' ', array([ 1., 0., 0., 0.]), ' ', array([ 1., 0., 0., 0.])), ('HT6W47', ': ', array([49, 0, 0, 0]), ' ', array([ 1., 0., 0., 0.]), ' ', array([ 1., 0., 0., 0.])), ('HT6W48', ': ', array([60, 0, 1, 1]), ' ', array([ 0.96774194, 0. , 0.01612903, 0.01612903]…	10110010	0.981284	0.46469	1	1
592	15	78786261	CCTxGTG	C	A	[('HT6W37', ': ', array([ 0, 0, 44, 0]), ' ', array([ 0., 0., 1., 0.]), ' ', array([ 0., 0., 1., 0.])), ('HT6W45', ': ', array([ 0, 0, 29, 0]), ' ', array([ 0., 0., 1., 0.]), ' ', array([ 0., 0., 1., 0.])), ('HT6W47', ': ', array([ 0, 1, 55, 0]), ' ', array([ 0. , 0.01785714, 0.98214286, 0. ]), ' ', array([ 0., 0., 1., 0.])), ('HT6W48', ': ', array([ 0, 0, 45, 0]), ' ', array([ 0., 0., 1., 0.]), …	10110010	0.997449	0.522091	1	1
593	15	97911115	CATxTCA	C	G	[('HT6W37', ': ', array([ 0, 0, 41, 0]), ' ', array([ 0., 0., 1., 0.]), ' ', array([ 0., 0., 1., 0.])), ('HT6W45', ': ', array([ 0, 0, 34, 0]), ' ', array([ 0., 0., 1., 0.]), ' ', array([ 0., 0., 1., 0.])), ('HT6W47', ': ', array([ 0, 0, 46, 1]), ' ', array([ 0. , 0. , 0.9787234, 0.0212766]), ' ', array([ 0., 0., 1., 0.])), ('HT6W48', ': ', array([ 0, 0, 57, 0]), ' ', array([ 0., 0., 1., 0.]), ' …	100010	0.996002	0.506114	1	1
594	16	2141690	AAGxCGC	C	G	[('HT6W37', ': ', array([ 0, 0, 39, 0]), ' ', array([ 0., 0., 1., 0.]), ' ', array([ 0., 0., 1., 0.])), ('HT6W45', ': ', array([ 0, 0, 42, 0]), ' ', array([ 0., 0., 1., 0.]), ' ', array([ 0., 0., 1., 0.])), ('HT6W47', ': ', array([ 0, 0, 40, 0]), ' ', array([ 0., 0., 1., 0.]), ' ', array([ 0., 0., 1., 0.])), ('HT6W48', ': ', array([ 0, 0, 51, 0]), ' ', array([ 0., 0., 1., 0.]), ' ', array([ 0., 0…	10110010	0.996825	0.557842	1	1
595	16	6897254	TGCxTTT	C	T	[('HT6W37', ': ', array([ 0, 0, 33, 0]), ' ', array([ 0., 0., 1., 0.]), ' ', array([ 0., 0., 1., 0.])), ('HT6W45', ': ', array([ 1, 0, 28, 0]), ' ', array([ 0.03448276, 0. , 0.96551724, 0. ]), ' ', array([ 0., 0., 1., 0.])), ('HT6W47', ': ', array([ 0, 1, 39, 0]), ' ', array([ 0. , 0.025, 0.975, 0. ]), ' ', array([ 0., 0., 1., 0.])), ('HT6W48', ': ', array([ 0, 0, 38, 0]), ' ', array([ 0., 0., 1.…	10110010	0.996429	0.458283	1	1
596	16	8709414	GATxTTG	C	A	[('HT6W37', ': ', array([ 0, 0, 33, 0]), ' ', array([ 0., 0., 1., 0.]), ' ', array([ 0., 0., 1., 0.])), ('HT6W45', ': ', array([ 0, 1, 35, 0]), ' ', array([ 0. , 0.02777778, 0.97222222, 0. ]), ' ', array([ 0., 0., 1., 0.])), ('HT6W47', ': ', array([ 0, 0, 43, 0]), ' ', array([ 0., 0., 1., 0.]), ' ', array([ 0., 0., 1., 0.])), ('HT6W48', ': ', array([ 0, 0, 40, 0]), ' ', array([ 0., 0., 1., 0.]), …	10110010	0.994891	0.455559	1	1
597	16	15064946	TAAxAAT	G	T	[('HT6W37', ': ', array([ 0, 0, 0, 81]), ' ', array([ 0., 0., 0., 1.]), ' ', array([ 0., 0., 0., 1.])), ('HT6W45', ': ', array([ 0, 0, 0, 67]), ' ', array([ 0., 0., 0., 1.]), ' ', array([ 0., 0., 0., 1.])), ('HT6W47', ': ', array([ 1, 1, 0, 91]), ' ', array([ 0.01075269, 0.01075269, 0. , 0.97849462]), ' ', array([ 0., 0., 0., 1.])), ('HT6W48', ': ', array([ 2, 2, 0, 83]), ' ', array([ 0.02298851,…	10110010	0.982777	0.246205	1	1
598	16	18434835	TGAxGGG	G	A	[('HT6W37', ': ', array([ 0, 0, 0, 34]), ' ', array([ 0., 0., 0., 1.]), ' ', array([ 0., 0., 0., 1.])), ('HT6W45', ': ', array([ 0, 0, 0, 29]), ' ', array([ 0., 0., 0., 1.]), ' ', array([ 0., 0., 0., 1.])), ('HT6W47', ': ', array([ 0, 0, 0, 37]), ' ', array([ 0., 0., 0., 1.]), ' ', array([ 0., 0., 0., 1.])), ('HT6W48', ': ', array([ 0, 0, 0, 37]), ' ', array([ 0., 0., 0., 1.]), ' ', array([ 0., 0…	100010	1	0.18878	0.995971	1
599	16	34424150	AACxTCC	C	A	[('HT6W37', ': ', array([ 0, 0, 38, 0]), ' ', array([ 0., 0., 1., 0.]), ' ', array([ 0., 0., 1., 0.])), ('HT6W45', ': ', array([ 0, 0, 30, 0]), ' ', array([ 0., 0., 1., 0.]), ' ', array([ 0., 0., 1., 0.])), ('HT6W47', ': ', array([ 0, 0, 41, 0]), ' ', array([ 0., 0., 1., 0.]), ' ', array([ 0., 0., 1., 0.])), ('HT6W48', ': ', array([ 0, 0, 29, 0]), ' ', array([ 0., 0., 1., 0.]), ' ', array([ 0., 0…	100010	0.996914	0.497151	1	1
600	16	34440146	TCCxAGG	A	G	[('HT6W37', ': ', array([29, 0, 0, 0]), ' ', array([ 1., 0., 0., 0.]), ' ', array([ 1., 0., 0., 0.])), ('HT6W45', ': ', array([31, 0, 0, 1]), ' ', array([ 0.96875, 0. , 0. , 0.03125]), ' ', array([ 1., 0., 0., 0.])), ('HT6W47', ': ', array([40, 0, 0, 0]), ' ', array([ 1., 0., 0., 0.]), ' ', array([ 1., 0., 0., 0.])), ('HT6W48', ': ', array([49, 0, 0, 0]), ' ', array([ 1., 0., 0., 0.]), ' ', array…	100010	0.998117	0.506686	1	1
601	16	34879944	CTGxTTT	T	C	[('HT6W37', ': ', array([ 0, 41, 0, 1]), ' ', array([ 0. , 0.97619048, 0. , 0.02380952]), ' ', array([ 0., 1., 0., 0.])), ('HT6W45', ': ', array([ 1, 32, 0, 0]), ' ', array([ 0.03030303, 0.96969697, 0. , 0. ]), ' ', array([ 0., 1., 0., 0.])), ('HT6W47', ': ', array([ 0, 40, 0, 0]), ' ', array([ 0., 1., 0., 0.]), ' ', array([ 0., 1., 0., 0.])), ('HT6W48', ': ', array([ 1, 53, 0, 0]), ' ', array([ …	10110010	0.990848	0.525356	1	1
602	16	70573845	GCTxATT	C	T	[('HT6W37', ': ', array([ 0, 0, 46, 0]), ' ', array([ 0., 0., 1., 0.]), ' ', array([ 0., 0., 1., 0.])), ('HT6W45', ': ', array([ 0, 0, 32, 0]), ' ', array([ 0., 0., 1., 0.]), ' ', array([ 0., 0., 1., 0.])), ('HT6W47', ': ', array([ 0, 1, 35, 1]), ' ', array([ 0. , 0.02702703, 0.94594595, 0.02702703]), ' ', array([ 0., 0., 1., 0.])), ('HT6W48', ': ', array([ 0, 0, 37, 0]), ' ', array([ 0., 0., 1.,…	10110010	0.992278	0.470643	0.999999	1
603	16	73558310	GTCxTGC	T	C	[('HT6W37', ': ', array([ 0, 32, 0, 0]), ' ', array([ 0., 1., 0., 0.]), ' ', array([ 0., 1., 0., 0.])), ('HT6W45', ': ', array([ 0, 37, 1, 0]), ' ', array([ 0. , 0.97368421, 0.02631579, 0. ]), ' ', array([ 0., 1., 0., 0.])), ('HT6W47', ': ', array([ 0, 39, 0, 0]), ' ', array([ 0. , 0.975, 0. , 0. ]), ' ', array([ 0., 1., 0., 0.])), ('HT6W48', ': ', array([ 0, 45, 0, 0]), ' ', array([ 0., 1., 0., …	10110010	0.997085	0.510568	1	1
604	17	3167377	AGGxTGG	C	T	[('HT6W37', ': ', array([ 0, 0, 47, 1]), ' ', array([ 0. , 0. , 0.97916667, 0.02083333]), ' ', array([ 0., 0., 1., 0.])), ('HT6W45', ': ', array([ 0, 0, 42, 0]), ' ', array([ 0., 0., 1., 0.]), ' ', array([ 0., 0., 1., 0.])), ('HT6W47', ': ', array([ 1, 0, 40, 0]), ' ', array([ 0.02439024, 0. , 0.97560976, 0. ]), ' ', array([ 0., 0., 1., 0.])), ('HT6W48', ': ', array([ 0, 1, 44, 0]), ' ', array([ …	100010	0.989503	0.496296	1	1
605	17	9476817	AATxTTA	C	T	[('HT6W37', ': ', array([ 0, 0, 33, 0]), ' ', array([ 0., 0., 1., 0.]), ' ', array([ 0., 0., 1., 0.])), ('HT6W45', ': ', array([ 0, 0, 33, 0]), ' ', array([ 0., 0., 1., 0.]), ' ', array([ 0., 0., 1., 0.])), ('HT6W47', ': ', array([ 0, 0, 42, 0]), ' ', array([ 0., 0., 1., 0.]), ' ', array([ 0., 0., 1., 0.])), ('HT6W48', ': ', array([ 0, 0, 43, 0]), ' ', array([ 0., 0., 1., 0.]), ' ', array([ 0., 0…	10110010	0.995238	0.444454	1	1
606	17	12191365	AGTxATT	A	C	[('HT6W37', ': ', array([45, 0, 0, 0]), ' ', array([ 1., 0., 0., 0.]), ' ', array([ 1., 0., 0., 0.])), ('HT6W45', ': ', array([35, 0, 0, 0]), ' ', array([ 1., 0., 0., 0.]), ' ', array([ 1., 0., 0., 0.])), ('HT6W47', ': ', array([42, 0, 0, 0]), ' ', array([ 1., 0., 0., 0.]), ' ', array([ 1., 0., 0., 0.])), ('HT6W48', ': ', array([43, 0, 0, 0]), ' ', array([ 1., 0., 0., 0.]), ' ', array([ 1., 0., 0…	100010	0.996416	0.54306	1	1
607	17	14033080	CCAxCTT	A	G	[('HT6W37', ': ', array([45, 0, 0, 0]), ' ', array([ 1., 0., 0., 0.]), ' ', array([ 1., 0., 0., 0.])), ('HT6W45', ': ', array([30, 0, 0, 0]), ' ', array([ 1., 0., 0., 0.]), ' ', array([ 1., 0., 0., 0.])), ('HT6W47', ': ', array([37, 0, 1, 1]), ' ', array([ 0.94871795, 0. , 0.02564103, 0.02564103]), ' ', array([ 1., 0., 0., 0.])), ('HT6W48', ': ', array([38, 0, 0, 1]), ' ', array([ 0.97435897, 0. …	10110010	0.977464	0.36573	1	1
608	17	15338982	ATTxTTG	C	A	[('HT6W37', ': ', array([ 0, 0, 23, 0]), ' ', array([ 0., 0., 1., 0.]), ' ', array([ 0., 0., 1., 0.])), ('HT6W45', ': ', array([ 0, 0, 26, 0]), ' ', array([ 0., 0., 1., 0.]), ' ', array([ 0., 0., 1., 0.])), ('HT6W47', ': ', array([ 0, 0, 24, 0]), ' ', array([ 0., 0., 1., 0.]), ' ', array([ 0., 0., 1., 0.])), ('HT6W48', ': ', array([ 0, 0, 27, 0]), ' ', array([ 0., 0., 1., 0.]), ' ', array([ 0., 0…	10110010	1	0.405	0.999953	1
609	17	16923576	AGAxATG	G	T	[('HT6W37', ': ', array([ 0, 0, 0, 52]), ' ', array([ 0., 0., 0., 1.]), ' ', array([ 0., 0., 0., 1.])), ('HT6W45', ': ', array([ 0, 0, 0, 34]), ' ', array([ 0., 0., 0., 1.]), ' ', array([ 0., 0., 0., 1.])), ('HT6W47', ': ', array([ 0, 0, 0, 33]), ' ', array([ 0., 0., 0., 1.]), ' ', array([ 0., 0., 0., 1.])), ('HT6W48', ': ', array([ 0, 0, 0, 42]), ' ', array([ 0., 0., 0., 1.]), ' ', array([ 0., 0…	100010	1	0.486651	1	1
610	17	18591311	AATxTCC	C	A	[('HT6W37', ': ', array([ 0, 0, 57, 0]), ' ', array([ 0., 0., 1., 0.]), ' ', array([ 0., 0., 1., 0.])), ('HT6W45', ': ', array([ 0, 0, 36, 0]), ' ', array([ 0., 0., 1., 0.]), ' ', array([ 0., 0., 1., 0.])), ('HT6W47', ': ', array([ 0, 0, 46, 0]), ' ', array([ 0., 0., 1., 0.]), ' ', array([ 0., 0., 1., 0.])), ('HT6W48', ': ', array([ 0, 0, 40, 0]), ' ', array([ 0., 0., 1., 0.]), ' ', array([ 0., 0…	100010	0.997151	0.438636	1	1
611	17	31877917	CAGxTTT	C	A	[('HT6W37', ': ', array([ 0, 0, 47, 0]), ' ', array([ 0., 0., 1., 0.]), ' ', array([ 0., 0., 1., 0.])), ('HT6W45', ': ', array([ 0, 0, 36, 0]), ' ', array([ 0., 0., 1., 0.]), ' ', array([ 0., 0., 1., 0.])), ('HT6W47', ': ', array([ 0, 0, 35, 0]), ' ', array([ 0., 0., 1., 0.]), ' ', array([ 0., 0., 1., 0.])), ('HT6W48', ': ', array([ 0, 0, 43, 0]), ' ', array([ 0., 0., 1., 0.]), ' ', array([ 0., 0…	10110010	0.991675	0.449311	1	1
612	17	38107318	CTGxCAG	C	T	[('HT6W37', ': ', array([ 0, 0, 43, 0]), ' ', array([ 0., 0., 1., 0.]), ' ', array([ 0., 0., 1., 0.])), ('HT6W45', ': ', array([ 0, 0, 35, 0]), ' ', array([ 0., 0., 1., 0.]), ' ', array([ 0., 0., 1., 0.])), ('HT6W47', ': ', array([ 0, 0, 36, 0]), ' ', array([ 0., 0., 1., 0.]), ' ', array([ 0., 0., 1., 0.])), ('HT6W48', ': ', array([ 0, 0, 52, 0]), ' ', array([ 0., 0., 1., 0.]), ' ', array([ 0., 0…	100010	1	0.436966	1	1
613	17	39078345	CTCxATC	C	T	[('HT6W37', ': ', array([ 0, 0, 31, 0]), ' ', array([ 0., 0., 1., 0.]), ' ', array([ 0., 0., 1., 0.])), ('HT6W45', ': ', array([ 0, 0, 38, 0]), ' ', array([ 0., 0., 1., 0.]), ' ', array([ 0., 0., 1., 0.])), ('HT6W47', ': ', array([ 0, 0, 39, 0]), ' ', array([ 0., 0., 1., 0.]), ' ', array([ 0., 0., 1., 0.])), ('HT6W48', ': ', array([ 0, 0, 33, 0]), ' ', array([ 0., 0., 1., 0.]), ' ', array([ 0., 0…	100010	0.996633	0.47723	1	1
614	17	50160449	CATxCTA	A	G	[('HT6W37', ': ', array([45, 0, 0, 0]), ' ', array([ 1., 0., 0., 0.]), ' ', array([ 1., 0., 0., 0.])), ('HT6W45', ': ', array([35, 0, 0, 0]), ' ', array([ 1., 0., 0., 0.]), ' ', array([ 1., 0., 0., 0.])), ('HT6W47', ': ', array([46, 0, 1, 0]), ' ', array([ 0.9787234, 0. , 0.0212766, 0. ]), ' ', array([ 1., 0., 0., 0.])), ('HT6W48', ': ', array([35, 0, 0, 0]), ' ', array([ 1., 0., 0., 0.]), ' ', a…	10110010	0.993559	0.45294	1	1
615	17	51430002	ATTxTTC	C	T	[('HT6W37', ': ', array([ 0, 0, 33, 0]), ' ', array([ 0., 0., 1., 0.]), ' ', array([ 0., 0., 1., 0.])), ('HT6W45', ': ', array([ 0, 0, 35, 0]), ' ', array([ 0., 0., 1., 0.]), ' ', array([ 0., 0., 1., 0.])), ('HT6W47', ': ', array([ 0, 0, 39, 0]), ' ', array([ 0., 0., 1., 0.]), ' ', array([ 0., 0., 1., 0.])), ('HT6W48', ': ', array([ 0, 1, 46, 0]), ' ', array([ 0. , 0.0212766, 0.9787234, 0. ]), ' …	100010	0.99499	0.493612	1	1
616	17	51702016	AACxTAA	G	A	[('HT6W37', ': ', array([ 0, 0, 0, 42]), ' ', array([ 0., 0., 0., 1.]), ' ', array([ 0., 0., 0., 1.])), ('HT6W45', ': ', array([ 0, 0, 0, 39]), ' ', array([ 0., 0., 0., 1.]), ' ', array([ 0., 0., 0., 1.])), ('HT6W47', ': ', array([ 0, 0, 0, 38]), ' ', array([ 0., 0., 0., 1.]), ' ', array([ 0., 0., 0., 1.])), ('HT6W48', ': ', array([ 0, 0, 0, 38]), ' ', array([ 0., 0., 0., 1.]), ' ', array([ 0., 0…	100010	0.99089	0.579004	1	1
617	17	68118209	TGAxAAT	G	T	[('HT6W37', ': ', array([ 0, 0, 0, 36]), ' ', array([ 0., 0., 0., 1.]), ' ', array([ 0., 0., 0., 1.])), ('HT6W45', ': ', array([ 0, 0, 0, 28]), ' ', array([ 0., 0., 0., 1.]), ' ', array([ 0., 0., 0., 1.])), ('HT6W47', ': ', array([ 0, 0, 0, 36]), ' ', array([ 0., 0., 0., 1.]), ' ', array([ 0., 0., 0., 1.])), ('HT6W48', ': ', array([ 0, 0, 0, 40]), ' ', array([ 0., 0., 0., 1.]), ' ', array([ 0., 0…	100010	0.992063	0.431856	1	1
618	17	72690761	TCTxTAT	C	A	[('HT6W37', ': ', array([ 1, 0, 32, 0]), ' ', array([ 0.03030303, 0. , 0.96969697, 0. ]), ' ', array([ 0., 0., 1., 0.])), ('HT6W45', ': ', array([ 0, 0, 45, 0]), ' ', array([ 0., 0., 1., 0.]), ' ', array([ 0., 0., 1., 0.])), ('HT6W47', ': ', array([ 0, 0, 50, 0]), ' ', array([ 0., 0., 1., 0.]), ' ', array([ 0., 0., 1., 0.])), ('HT6W48', ': ', array([ 1, 0, 46, 0]), ' ', array([ 0.0212766, 0. , 0.…	100010	0.98871	0.491453	1	1
619	17	72711880	AGAxTTC	A	G	[('HT6W37', ': ', array([46, 1, 0, 0]), ' ', array([ 0.9787234, 0.0212766, 0. , 0. ]), ' ', array([ 1., 0., 0., 0.])), ('HT6W45', ': ', array([35, 0, 0, 0]), ' ', array([ 1., 0., 0., 0.]), ' ', array([ 1., 0., 0., 0.])), ('HT6W47', ': ', array([41, 0, 0, 0]), ' ', array([ 1., 0., 0., 0.]), ' ', array([ 1., 0., 0., 0.])), ('HT6W48', ': ', array([42, 0, 2, 0]), ' ', array([ 0.95454545, 0. , 0.04545…	100010	0.98045	0.552521	1	1
620	17	77222390	AGTxCAG	G	A	[('HT6W37', ': ', array([ 0, 0, 0, 33]), ' ', array([ 0., 0., 0., 1.]), ' ', array([ 0., 0., 0., 1.])), ('HT6W45', ': ', array([ 0, 0, 0, 34]), ' ', array([ 0., 0., 0., 1.]), ' ', array([ 0., 0., 0., 1.])), ('HT6W47', ': ', array([ 0, 0, 0, 40]), ' ', array([ 0., 0., 0., 1.]), ' ', array([ 0., 0., 0., 1.])), ('HT6W48', ': ', array([ 0, 0, 0, 32]), ' ', array([ 0., 0., 0., 1.]), ' ', array([ 0., 0…	100010	1	0.545401	1	1
621	18	1608336	AATxTAT	C	A	[('HT6W37', ': ', array([ 0, 0, 39, 0]), ' ', array([ 0., 0., 1., 0.]), ' ', array([ 0., 0., 1., 0.])), ('HT6W45', ': ', array([ 0, 0, 42, 0]), ' ', array([ 0., 0., 1., 0.]), ' ', array([ 0., 0., 1., 0.])), ('HT6W47', ': ', array([ 0, 0, 51, 0]), ' ', array([ 0., 0., 1., 0.]), ' ', array([ 0., 0., 1., 0.])), ('HT6W48', ': ', array([ 0, 0, 37, 0]), ' ', array([ 0., 0., 1., 0.]), ' ', array([ 0., 0…	10110010	0.997354	0.500789	1	1
622	18	7998099	GTTxTAT	C	A	[('HT6W37', ': ', array([ 0, 0, 46, 0]), ' ', array([ 0., 0., 1., 0.]), ' ', array([ 0., 0., 1., 0.])), ('HT6W45', ': ', array([ 0, 0, 39, 1]), ' ', array([ 0. , 0. , 0.975, 0.025]), ' ', array([ 0., 0., 1., 0.])), ('HT6W47', ': ', array([ 0, 0, 32, 0]), ' ', array([ 0., 0., 1., 0.]), ' ', array([ 0., 0., 1., 0.])), ('HT6W48', ': ', array([ 0, 0, 51, 0]), ' ', array([ 0., 0., 1., 0.]), ' ', array…	10110010	1	0.526245	1	1
623	18	12218896	TGCxACT	T	C	[('HT6W37', ': ', array([ 0, 42, 1, 0]), ' ', array([ 0. , 0.97674419, 0.02325581, 0. ]), ' ', array([ 0., 1., 0., 0.])), ('HT6W45', ': ', array([ 0, 44, 0, 0]), ' ', array([ 0., 1., 0., 0.]), ' ', array([ 0., 1., 0., 0.])), ('HT6W47', ': ', array([ 0, 45, 0, 0]), ' ', array([ 0., 1., 0., 0.]), ' ', array([ 0., 1., 0., 0.])), ('HT6W48', ': ', array([ 0, 34, 0, 0]), ' ', array([ 0., 1., 0., 0.]), …	100010	0.992223	0.482558	1	1
624	18	22644468	ACGxGAC	A	G	[('HT6W37', ': ', array([30, 0, 0, 1]), ' ', array([ 0.96774194, 0. , 0. , 0.03225806]), ' ', array([ 1., 0., 0., 0.])), ('HT6W45', ': ', array([34, 0, 0, 0]), ' ', array([ 1., 0., 0., 0.]), ' ', array([ 1., 0., 0., 0.])), ('HT6W47', ': ', array([34, 0, 0, 0]), ' ', array([ 1., 0., 0., 0.]), ' ', array([ 1., 0., 0., 0.])), ('HT6W48', ': ', array([56, 0, 0, 0]), ' ', array([ 1., 0., 0., 0.]), ' ',…	10110010	0.99199	0.465312	1	1
625	18	24262233	ATGxAAT	A	G	[('HT6W37', ': ', array([41, 0, 0, 0]), ' ', array([ 1., 0., 0., 0.]), ' ', array([ 1., 0., 0., 0.])), ('HT6W45', ': ', array([42, 0, 0, 0]), ' ', array([ 1., 0., 0., 0.]), ' ', array([ 1., 0., 0., 0.])), ('HT6W47', ': ', array([36, 0, 0, 0]), ' ', array([ 1., 0., 0., 0.]), ' ', array([ 1., 0., 0., 0.])), ('HT6W48', ': ', array([34, 0, 0, 0]), ' ', array([ 1., 0., 0., 0.]), ' ', array([ 1., 0., 0…	10110010	1	0.555464	1	1
626	18	27026834	ATTxTCA	C	A	[('HT6W37', ': ', array([ 0, 0, 39, 1]), ' ', array([ 0. , 0. , 0.975, 0.025]), ' ', array([ 0., 0., 1., 0.])), ('HT6W45', ': ', array([ 0, 0, 35, 0]), ' ', array([ 0., 0., 1., 0.]), ' ', array([ 0., 0., 1., 0.])), ('HT6W47', ': ', array([ 0, 1, 47, 0]), ' ', array([ 0. , 0.02083333, 0.97916667, 0. ]), ' ', array([ 0., 0., 1., 0.])), ('HT6W48', ': ', array([ 0, 0, 39, 0]), ' ', array([ 0., 0., 1.…	10110010	0.989693	0.522908	1	1
627	18	27595625	CCCxTTT	T	A	[('HT6W37', ': ', array([ 0, 44, 0, 0]), ' ', array([ 0., 1., 0., 0.]), ' ', array([ 0., 1., 0., 0.])), ('HT6W45', ': ', array([ 0, 31, 0, 0]), ' ', array([ 0., 1., 0., 0.]), ' ', array([ 0., 1., 0., 0.])), ('HT6W47', ': ', array([ 0, 47, 0, 0]), ' ', array([ 0., 1., 0., 0.]), ' ', array([ 0., 1., 0., 0.])), ('HT6W48', ': ', array([ 0, 35, 0, 0]), ' ', array([ 0., 1., 0., 0.]), ' ', array([ 0., 1…	100010	0.994955	0.357143	1	1
628	18	27932316	GATxTGT	T	G	[('HT6W37', ': ', array([ 0, 44, 0, 0]), ' ', array([ 0., 1., 0., 0.]), ' ', array([ 0., 1., 0., 0.])), ('HT6W45', ': ', array([ 0, 44, 0, 1]), ' ', array([ 0. , 0.97777778, 0. , 0.02222222]), ' ', array([ 0., 1., 0., 0.])), ('HT6W47', ': ', array([ 0, 36, 0, 1]), ' ', array([ 0. , 0.97297297, 0. , 0.02702703]), ' ', array([ 0., 1., 0., 0.])), ('HT6W48', ': ', array([ 0, 33, 1, 0]), ' ', array([ …	10110010	0.985596	0.505231	1	1
629	18	31306655	TTAxACT	T	C	[('HT6W37', ': ', array([ 0, 46, 0, 0]), ' ', array([ 0., 1., 0., 0.]), ' ', array([ 0., 1., 0., 0.])), ('HT6W45', ': ', array([ 0, 42, 0, 0]), ' ', array([ 0., 1., 0., 0.]), ' ', array([ 0., 1., 0., 0.])), ('HT6W47', ': ', array([ 0, 41, 1, 0]), ' ', array([ 0. , 0.97619048, 0.02380952, 0. ]), ' ', array([ 0., 1., 0., 0.])), ('HT6W48', ': ', array([ 0, 60, 0, 0]), ' ', array([ 0., 1., 0., 0.]), …	100010	0.99291	0.47832	1	1
630	18	42114859	CTCxAAA	A	C	[('HT6W37', ': ', array([39, 1, 1, 0]), ' ', array([ 0.95121951, 0.02439024, 0.02439024, 0. ]), ' ', array([ 1., 0., 0., 0.])), ('HT6W45', ': ', array([31, 0, 1, 0]), ' ', array([ 0.96875, 0. , 0.03125, 0. ]), ' ', array([ 1., 0., 0., 0.])), ('HT6W47', ': ', array([43, 0, 0, 0]), ' ', array([ 1., 0., 0., 0.]), ' ', array([ 1., 0., 0., 0.])), ('HT6W48', ': ', array([35, 0, 0, 0]), ' ', array([ 1.,…	10110010	0.989709	0.453698	1	1
631	18	43603985	TTTxCTG	T	A	[('HT6W37', ': ', array([ 0, 41, 0, 0]), ' ', array([ 0., 1., 0., 0.]), ' ', array([ 0., 1., 0., 0.])), ('HT6W45', ': ', array([ 0, 35, 0, 0]), ' ', array([ 0., 1., 0., 0.]), ' ', array([ 0., 1., 0., 0.])), ('HT6W47', ': ', array([ 0, 41, 0, 0]), ' ', array([ 0., 1., 0., 0.]), ' ', array([ 0., 1., 0., 0.])), ('HT6W48', ': ', array([ 0, 45, 1, 0]), ' ', array([ 0. , 0.97826087, 0.02173913, 0. ]), …	100010	0.994807	0.507653	1	1
632	18	43603986	TTTxTGC	C	A	[('HT6W37', ': ', array([ 0, 0, 41, 0]), ' ', array([ 0., 0., 1., 0.]), ' ', array([ 0., 0., 1., 0.])), ('HT6W45', ': ', array([ 0, 0, 35, 0]), ' ', array([ 0., 0., 1., 0.]), ' ', array([ 0., 0., 1., 0.])), ('HT6W47', ': ', array([ 0, 0, 41, 0]), ' ', array([ 0., 0., 1., 0.]), ' ', array([ 0., 0., 1., 0.])), ('HT6W48', ': ', array([ 0, 0, 45, 1]), ' ', array([ 0. , 0. , 0.97826087, 0.02173913]), …	100010	0.987368	0.507653	1	1
633	18	61595018	GATxTAT	T	G	[('HT6W37', ': ', array([ 0, 38, 0, 0]), ' ', array([ 0., 1., 0., 0.]), ' ', array([ 0., 1., 0., 0.])), ('HT6W45', ': ', array([ 0, 36, 0, 0]), ' ', array([ 0., 1., 0., 0.]), ' ', array([ 0., 1., 0., 0.])), ('HT6W47', ': ', array([ 0, 42, 0, 0]), ' ', array([ 0., 1., 0., 0.]), ' ', array([ 0., 1., 0., 0.])), ('HT6W48', ': ', array([ 0, 43, 0, 0]), ' ', array([ 0., 1., 0., 0.]), ' ', array([ 0., 1…	10110010	0.990644	0.523362	1	1
634	18	64225769	AGTxACA	A	G	[('HT6W37', ': ', array([52, 0, 0, 0]), ' ', array([ 1., 0., 0., 0.]), ' ', array([ 1., 0., 0., 0.])), ('HT6W45', ': ', array([35, 0, 0, 0]), ' ', array([ 1., 0., 0., 0.]), ' ', array([ 1., 0., 0., 0.])), ('HT6W47', ': ', array([45, 0, 0, 0]), ' ', array([ 1., 0., 0., 0.]), ' ', array([ 1., 0., 0., 0.])), ('HT6W48', ': ', array([47, 0, 0, 0]), ' ', array([ 1., 0., 0., 0.]), ' ', array([ 1., 0., 0…	10110010	1	0.439663	1	1
635	18	65454123	TTTxGTT	T	A	[('HT6W37', ': ', array([ 0, 34, 0, 0]), ' ', array([ 0., 1., 0., 0.]), ' ', array([ 0., 1., 0., 0.])), ('HT6W45', ': ', array([ 0, 38, 0, 0]), ' ', array([ 0., 1., 0., 0.]), ' ', array([ 0., 1., 0., 0.])), ('HT6W47', ': ', array([ 0, 39, 0, 0]), ' ', array([ 0., 1., 0., 0.]), ' ', array([ 0., 1., 0., 0.])), ('HT6W48', ': ', array([ 0, 55, 0, 0]), ' ', array([ 0., 1., 0., 0.]), ' ', array([ 0., 1…	10110010	0.992063	0.453634	1	1
636	18	71591000	TTTxCAT	T	C	[('HT6W37', ': ', array([ 0, 41, 0, 0]), ' ', array([ 0., 1., 0., 0.]), ' ', array([ 0., 1., 0., 0.])), ('HT6W45', ': ', array([ 0, 48, 0, 1]), ' ', array([ 0. , 0.97959184, 0. , 0.02040816]), ' ', array([ 0., 1., 0., 0.])), ('HT6W47', ': ', array([ 0, 51, 0, 0]), ' ', array([ 0., 1., 0., 0.]), ' ', array([ 0., 1., 0., 0.])), ('HT6W48', ': ', array([ 0, 39, 0, 0]), ' ', array([ 0., 1., 0., 0.]), …	100010	0.997904	0.529484	1	1
637	18	73167986	AAAxACA	G	T	[('HT6W37', ': ', array([ 0, 1, 0, 36]), ' ', array([ 0. , 0.02702703, 0. , 0.97297297]), ' ', array([ 0., 0., 0., 1.])), ('HT6W45', ': ', array([ 0, 0, 0, 29]), ' ', array([ 0., 0., 0., 1.]), ' ', array([ 0., 0., 0., 1.])), ('HT6W47', ': ', array([ 0, 0, 1, 38]), ' ', array([ 0. , 0. , 0.02564103, 0.97435897]), ' ', array([ 0., 0., 0., 1.])), ('HT6W48', ': ', array([ 0, 0, 0, 45]), ' ', array([ …	100010	0.994148	0.513205	1	1
638	19	12648058	TTTxTGT	C	A	[('HT6W37', ': ', array([ 0, 0, 32, 0]), ' ', array([ 0., 0., 1., 0.]), ' ', array([ 0., 0., 1., 0.])), ('HT6W45', ': ', array([ 0, 0, 41, 0]), ' ', array([ 0., 0., 1., 0.]), ' ', array([ 0., 0., 1., 0.])), ('HT6W47', ': ', array([ 0, 0, 51, 1]), ' ', array([ 0. , 0. , 0.98076923, 0.01923077]), ' ', array([ 0., 0., 1., 0.])), ('HT6W48', ': ', array([ 0, 0, 54, 0]), ' ', array([ 0., 0., 1., 0.]), …	10110010	0.997253	0.504375	1	1
639	19	24582207	GGGxTCT	A	C	[('HT6W37', ': ', array([71, 0, 0, 0]), ' ', array([ 1., 0., 0., 0.]), ' ', array([ 1., 0., 0., 0.])), ('HT6W45', ': ', array([63, 0, 0, 0]), ' ', array([ 1., 0., 0., 0.]), ' ', array([ 1., 0., 0., 0.])), ('HT6W47', ': ', array([78, 1, 1, 0]), ' ', array([ 0.975 , 0.0125, 0.0125, 0. ]), ' ', array([ 1., 0., 0., 0.])), ('HT6W48', ': ', array([70, 1, 0, 0]), ' ', array([ 0.98591549, 0.01408451, 0. …	100010	0.98664	0.215854	1	1
640	19	30043705	GGTxTGG	T	G	[('HT6W37', ': ', array([ 0, 42, 0, 1]), ' ', array([ 0. , 0.97674419, 0. , 0.02325581]), ' ', array([ 0., 1., 0., 0.])), ('HT6W45', ': ', array([ 0, 24, 1, 0]), ' ', array([ 0. , 0.96, 0.04, 0. ]), ' ', array([ 0., 1., 0., 0.])), ('HT6W47', ': ', array([ 0, 28, 0, 1]), ' ', array([ 0. , 0.96551724, 0. , 0.03448276]), ' ', array([ 0., 1., 0., 0.])), ('HT6W48', ': ', array([ 0, 41, 0, 0]), ' ', ar…	10110010	0.981781	0.498432	1	1
641	19	31411935	TTTxCTT	T	C	[('HT6W37', ': ', array([ 0, 23, 0, 0]), ' ', array([ 0., 1., 0., 0.]), ' ', array([ 0., 1., 0., 0.])), ('HT6W45', ': ', array([ 0, 34, 0, 0]), ' ', array([ 0., 1., 0., 0.]), ' ', array([ 0., 1., 0., 0.])), ('HT6W47', ': ', array([ 0, 34, 0, 0]), ' ', array([ 0., 1., 0., 0.]), ' ', array([ 0., 1., 0., 0.])), ('HT6W48', ': ', array([ 0, 43, 0, 0]), ' ', array([ 0., 1., 0., 0.]), ' ', array([ 0., 1…	100010	0.99357	0.453704	1	1
642	19	31423382	GATxTAG	C	A	[('HT6W37', ': ', array([ 0, 0, 40, 0]), ' ', array([ 0., 0., 1., 0.]), ' ', array([ 0., 0., 1., 0.])), ('HT6W45', ': ', array([ 0, 0, 33, 0]), ' ', array([ 0., 0., 1., 0.]), ' ', array([ 0., 0., 1., 0.])), ('HT6W47', ': ', array([ 0, 0, 32, 0]), ' ', array([ 0., 0., 1., 0.]), ' ', array([ 0., 0., 1., 0.])), ('HT6W48', ': ', array([ 0, 0, 32, 0]), ' ', array([ 0., 0., 1., 0.]), ' ', array([ 0., 0…	10110010	1	0.544198	1	1
643	19	34362680	ATTxTTC	C	A	[('HT6W37', ': ', array([ 0, 0, 46, 0]), ' ', array([ 0., 0., 1., 0.]), ' ', array([ 0., 0., 1., 0.])), ('HT6W45', ': ', array([ 0, 0, 25, 0]), ' ', array([ 0., 0., 1., 0.]), ' ', array([ 0., 0., 1., 0.])), ('HT6W47', ': ', array([ 1, 0, 41, 0]), ' ', array([ 0.02380952, 0. , 0.97619048, 0. ]), ' ', array([ 0., 0., 1., 0.])), ('HT6W48', ': ', array([ 0, 0, 33, 0]), ' ', array([ 0., 0., 1., 0.]), …	100010	0.994709	0.436184	1	1
644	19	34474593	ACGxTGG	A	G	[('HT6W37', ': ', array([38, 0, 0, 0]), ' ', array([ 1., 0., 0., 0.]), ' ', array([ 1., 0., 0., 0.])), ('HT6W45', ': ', array([34, 0, 0, 0]), ' ', array([ 1., 0., 0., 0.]), ' ', array([ 1., 0., 0., 0.])), ('HT6W47', ': ', array([49, 0, 0, 1]), ' ', array([ 0.98, 0. , 0. , 0.02]), ' ', array([ 1., 0., 0., 0.])), ('HT6W48', ': ', array([38, 0, 0, 0]), ' ', array([ 1., 0., 0., 0.]), ' ', array([ 1.,…	100010	0.994929	0.543734	1	1
645	19	37795367	GGCxCCG	G	A	[('HT6W37', ': ', array([ 0, 0, 0, 51]), ' ', array([ 0., 0., 0., 1.]), ' ', array([ 0., 0., 0., 1.])), ('HT6W45', ': ', array([ 0, 0, 0, 33]), ' ', array([ 0., 0., 0., 1.]), ' ', array([ 0., 0., 0., 1.])), ('HT6W47', ': ', array([ 0, 0, 1, 44]), ' ', array([ 0. , 0. , 0.02222222, 0.97777778]), ' ', array([ 0., 0., 0., 1.])), ('HT6W48', ': ', array([ 0, 0, 0, 48]), ' ', array([ 0., 0., 0., 1.]), …	100010	0.997531	0.481678	1	1
646	19	39321125	CTTxTTT	T	A	[('HT6W37', ': ', array([ 0, 43, 0, 0]), ' ', array([ 0., 1., 0., 0.]), ' ', array([ 0., 1., 0., 0.])), ('HT6W45', ': ', array([ 1, 39, 0, 0]), ' ', array([ 0.025, 0.975, 0. , 0. ]), ' ', array([ 0., 1., 0., 0.])), ('HT6W47', ': ', array([ 0, 49, 0, 0]), ' ', array([ 0., 1., 0., 0.]), ' ', array([ 0., 1., 0., 0.])), ('HT6W48', ': ', array([ 1, 37, 0, 0]), ' ', array([ 0.02631579, 0.97368421, 0. ,…	10110010	0.990367	0.457671	1	1
647	19	40092578	GGAxAGG	G	A	[('HT6W37', ': ', array([ 0, 0, 0, 40]), ' ', array([ 0., 0., 0., 1.]), ' ', array([ 0., 0., 0., 1.])), ('HT6W45', ': ', array([ 0, 0, 0, 32]), ' ', array([ 0., 0., 0., 1.]), ' ', array([ 0., 0., 0., 1.])), ('HT6W47', ': ', array([ 0, 0, 0, 37]), ' ', array([ 0., 0., 0., 1.]), ' ', array([ 0., 0., 0., 1.])), ('HT6W48', ': ', array([ 0, 0, 0, 34]), ' ', array([ 0., 0., 0., 1.]), ' ', array([ 0., 0…	100010	0.994661	0.442308	1	1
648	19	46553797	CAGxGAT	C	T	[('HT6W37', ': ', array([ 0, 0, 27, 0]), ' ', array([ 0., 0., 1., 0.]), ' ', array([ 0., 0., 1., 0.])), ('HT6W45', ': ', array([ 2, 0, 40, 0]), ' ', array([ 0.04761905, 0. , 0.95238095, 0. ]), ' ', array([ 0., 0., 1., 0.])), ('HT6W47', ': ', array([ 0, 0, 43, 0]), ' ', array([ 0., 0., 1., 0.]), ' ', array([ 0., 0., 1., 0.])), ('HT6W48', ': ', array([ 0, 0, 49, 0]), ' ', array([ 0., 0., 1., 0.]), …	10110010	1	0.578671	1	1
649	19	53594832	TGCxCTC	G	A	[('HT6W37', ': ', array([ 0, 0, 0, 35]), ' ', array([ 0., 0., 0., 1.]), ' ', array([ 0., 0., 0., 1.])), ('HT6W45', ': ', array([ 0, 0, 0, 30]), ' ', array([ 0., 0., 0., 1.]), ' ', array([ 0., 0., 0., 1.])), ('HT6W47', ': ', array([ 0, 0, 0, 27]), ' ', array([ 0., 0., 0., 1.]), ' ', array([ 0., 0., 0., 1.])), ('HT6W48', ': ', array([ 0, 0, 0, 52]), ' ', array([ 0., 0., 0., 1.]), ' ', array([ 0., 0…	100010	0.997585	0.516555	1	1
650	19	54266460	TAGxTAG	C	G	[('HT6W37', ': ', array([ 0, 0, 36, 0]), ' ', array([ 0., 0., 1., 0.]), ' ', array([ 0., 0., 1., 0.])), ('HT6W45', ': ', array([ 0, 0, 32, 0]), ' ', array([ 0., 0., 1., 0.]), ' ', array([ 0., 0., 1., 0.])), ('HT6W47', ': ', array([ 0, 0, 36, 1]), ' ', array([ 0. , 0. , 0.97297297, 0.02702703]), ' ', array([ 0., 0., 1., 0.])), ('HT6W48', ': ', array([ 0, 0, 42, 0]), ' ', array([ 0., 0., 1., 0.]), …	10110010	0.983647	0.575595	1	1
651	19	55460552	GGCxTAA	G	A	[('HT6W37', ': ', array([ 0, 0, 0, 37]), ' ', array([ 0., 0., 0., 1.]), ' ', array([ 0., 0., 0., 1.])), ('HT6W45', ': ', array([ 0, 0, 0, 30]), ' ', array([ 0., 0., 0., 1.]), ' ', array([ 0., 0., 0., 1.])), ('HT6W47', ': ', array([ 0, 0, 0, 50]), ' ', array([ 0., 0., 0., 1.]), ' ', array([ 0., 0., 0., 1.])), ('HT6W48', ': ', array([ 0, 0, 0, 64]), ' ', array([ 0., 0., 0., 1.]), ' ', array([ 0., 0…	100010	0.995368	0.508727	1	1
652	19	56686993	CAGxGGG	A	G	[('HT6W37', ': ', array([41, 0, 1, 0]), ' ', array([ 0.97619048, 0. , 0.02380952, 0. ]), ' ', array([ 1., 0., 0., 0.])), ('HT6W45', ': ', array([22, 0, 0, 0]), ' ', array([ 1., 0., 0., 0.]), ' ', array([ 1., 0., 0., 0.])), ('HT6W47', ': ', array([55, 0, 0, 0]), ' ', array([ 1., 0., 0., 0.]), ' ', array([ 1., 0., 0., 0.])), ('HT6W48', ': ', array([43, 0, 0, 0]), ' ', array([ 1., 0., 0., 0.]), ' ',…	100010	0.990256	0.446737	1	1
653	20	4441827	ATAxGTG	G	A	[('HT6W37', ': ', array([ 0, 0, 0, 32]), ' ', array([ 0., 0., 0., 1.]), ' ', array([ 0., 0., 0., 1.])), ('HT6W45', ': ', array([ 0, 0, 0, 32]), ' ', array([ 0., 0., 0., 1.]), ' ', array([ 0., 0., 0., 1.])), ('HT6W47', ': ', array([ 0, 0, 0, 43]), ' ', array([ 0., 0., 0., 1.]), ' ', array([ 0., 0., 0., 1.])), ('HT6W48', ': ', array([ 0, 0, 0, 41]), ' ', array([ 0., 0., 0., 1.]), ' ', array([ 0., 0…	10110010	0.996516	0.531548	1	1
654	20	12623460	TGAxAAT	G	A	[('HT6W37', ': ', array([ 0, 0, 0, 40]), ' ', array([ 0., 0., 0., 1.]), ' ', array([ 0., 0., 0., 1.])), ('HT6W45', ': ', array([ 0, 0, 0, 38]), ' ', array([ 0., 0., 0., 1.]), ' ', array([ 0., 0., 0., 1.])), ('HT6W47', ': ', array([ 0, 0, 0, 31]), ' ', array([ 0., 0., 0., 1.]), ' ', array([ 0., 0., 0., 1.])), ('HT6W48', ': ', array([ 0, 0, 0, 37]), ' ', array([ 0., 0., 0., 1.]), ' ', array([ 0., 0…	10110010	1	0.460408	1	1
655	20	15686580	TTTxTTT	C	A	[('HT6W37', ': ', array([ 0, 0, 32, 0]), ' ', array([ 0., 0., 1., 0.]), ' ', array([ 0., 0., 1., 0.])), ('HT6W45', ': ', array([ 0, 0, 39, 0]), ' ', array([ 0., 0., 1., 0.]), ' ', array([ 0., 0., 1., 0.])), ('HT6W47', ': ', array([ 0, 0, 51, 0]), ' ', array([ 0., 0., 1., 0.]), ' ', array([ 0., 0., 1., 0.])), ('HT6W48', ': ', array([ 0, 0, 62, 0]), ' ', array([ 0., 0., 1., 0.]), ' ', array([ 0., 0…	100010	0.994444	0.569048	1	1
656	20	20099928	TTCxATT	G	A	[('HT6W37', ': ', array([ 0, 0, 0, 35]), ' ', array([ 0., 0., 0., 1.]), ' ', array([ 0., 0., 0., 1.])), ('HT6W45', ': ', array([ 0, 0, 0, 32]), ' ', array([ 0., 0., 0., 1.]), ' ', array([ 0., 0., 0., 1.])), ('HT6W47', ': ', array([ 0, 0, 0, 42]), ' ', array([ 0., 0., 0., 1.]), ' ', array([ 0., 0., 0., 1.])), ('HT6W48', ': ', array([ 0, 1, 0, 44]), ' ', array([ 0. , 0.02222222, 0. , 0.97777778]), …	10110010	0.990023	0.493888	1	1
657	20	22887005	AATxCAT	T	G	[('HT6W37', ': ', array([ 0, 48, 0, 0]), ' ', array([ 0., 1., 0., 0.]), ' ', array([ 0., 1., 0., 0.])), ('HT6W45', ': ', array([ 0, 42, 0, 1]), ' ', array([ 0. , 0.97674419, 0. , 0.02325581]), ' ', array([ 0., 1., 0., 0.])), ('HT6W47', ': ', array([ 0, 34, 0, 0]), ' ', array([ 0., 1., 0., 0.]), ' ', array([ 0., 1., 0., 0.])), ('HT6W48', ': ', array([ 0, 43, 0, 1]), ' ', array([ 0. , 0.97727273, 0…	100010	0.989551	0.562857	1	1
658	20	24474625	CGCxGAT	G	T	[('HT6W37', ': ', array([ 0, 0, 0, 42]), ' ', array([ 0., 0., 0., 1.]), ' ', array([ 0., 0., 0., 1.])), ('HT6W45', ': ', array([ 0, 0, 0, 57]), ' ', array([ 0., 0., 0., 1.]), ' ', array([ 0., 0., 0., 1.])), ('HT6W47', ': ', array([ 0, 0, 0, 52]), ' ', array([ 0., 0., 0., 1.]), ' ', array([ 0., 0., 0., 1.])), ('HT6W48', ': ', array([ 0, 0, 0, 54]), ' ', array([ 0., 0., 0., 1.]), ' ', array([ 0., 0…	10110010	0.997085	0.525167	1	1
659	20	38237974	CTAxAAA	C	T	[('HT6W37', ': ', array([ 0, 0, 30, 0]), ' ', array([ 0., 0., 1., 0.]), ' ', array([ 0., 0., 1., 0.])), ('HT6W45', ': ', array([ 0, 0, 30, 0]), ' ', array([ 0., 0., 1., 0.]), ' ', array([ 0., 0., 1., 0.])), ('HT6W47', ': ', array([ 0, 0, 42, 0]), ' ', array([ 0., 0., 1., 0.]), ' ', array([ 0., 0., 1., 0.])), ('HT6W48', ': ', array([ 0, 0, 51, 0]), ' ', array([ 0., 0., 1., 0.]), ' ', array([ 0., 0…	10110010	0.988557	0.528553	1	1
660	20	41941473	ACAxATC	C	A	[('HT6W37', ': ', array([ 0, 0, 46, 0]), ' ', array([ 0., 0., 1., 0.]), ' ', array([ 0., 0., 1., 0.])), ('HT6W45', ': ', array([ 0, 0, 39, 0]), ' ', array([ 0., 0., 1., 0.]), ' ', array([ 0., 0., 1., 0.])), ('HT6W47', ': ', array([ 0, 0, 49, 0]), ' ', array([ 0., 0., 1., 0.]), ' ', array([ 0., 0., 1., 0.])), ('HT6W48', ': ', array([ 0, 0, 47, 1]), ' ', array([ 0. , 0. , 0.97916667, 0.02083333]), …	100010	0.995463	0.505952	1	1
661	20	43340624	AGCxGGT	G	C	[('HT6W37', ': ', array([ 0, 0, 0, 26]), ' ', array([ 0., 0., 0., 1.]), ' ', array([ 0., 0., 0., 1.])), ('HT6W45', ': ', array([ 0, 0, 0, 29]), ' ', array([ 0., 0., 0., 1.]), ' ', array([ 0., 0., 0., 1.])), ('HT6W47', ': ', array([ 0, 0, 0, 42]), ' ', array([ 0., 0., 0., 1.]), ' ', array([ 0., 0., 0., 1.])), ('HT6W48', ': ', array([ 0, 0, 0, 54]), ' ', array([ 0., 0., 0., 1.]), ' ', array([ 0., 0…	10110010	0.993659	0.504863	1	1
662	20	46927317	CCCxATT	T	C	[('HT6W37', ': ', array([ 0, 35, 0, 1]), ' ', array([ 0. , 0.97222222, 0. , 0.02777778]), ' ', array([ 0., 1., 0., 0.])), ('HT6W45', ': ', array([ 0, 32, 0, 0]), ' ', array([ 0., 1., 0., 0.]), ' ', array([ 0., 1., 0., 0.])), ('HT6W47', ': ', array([ 0, 36, 0, 0]), ' ', array([ 0., 1., 0., 0.]), ' ', array([ 0., 1., 0., 0.])), ('HT6W48', ': ', array([ 0, 33, 0, 0]), ' ', array([ 0., 1., 0., 0.]), …	100010	0.990517	0.521164	1	1
663	20	57921241	TTGxGGC	T	C	[('HT6W37', ': ', array([ 0, 45, 0, 0]), ' ', array([ 0., 1., 0., 0.]), ' ', array([ 0., 1., 0., 0.])), ('HT6W45', ': ', array([ 0, 29, 0, 0]), ' ', array([ 0., 1., 0., 0.]), ' ', array([ 0., 1., 0., 0.])), ('HT6W47', ': ', array([ 0, 29, 0, 0]), ' ', array([ 0., 1., 0., 0.]), ' ', array([ 0., 1., 0., 0.])), ('HT6W48', ': ', array([ 0, 45, 0, 1]), ' ', array([ 0. , 0.97826087, 0. , 0.02173913]), …	10110010	0.996894	0.47581	1	1
664	21	9851990	ACTxGGA	T	C	[('HT6W37', ': ', array([ 0, 166, 1, 1]), ' ', array([ 0. , 0.98809524, 0.00595238, 0.00595238]), ' ', array([ 0., 1., 0., 0.])), ('HT6W45', ': ', array([ 0, 157, 0, 2]), ' ', array([ 0. , 0.98742138, 0. , 0.01257862]), ' ', array([ 0., 1., 0., 0.])), ('HT6W47', ': ', array([ 0, 193, 0, 0]), ' ', array([ 0., 1., 0., 0.]), ' ', array([ 0., 1., 0., 0.])), ('HT6W48', ': ', array([ 0, 186, 0, 1]), ' …	10110010	0.992622	0.125718	1	1
665	21	11161881	CTGxCAA	A	G	[('HT6W37', ': ', array([213, 0, 0, 1]), ' ', array([ 0.9953271, 0. , 0. , 0.0046729]), ' ', array([ 1., 0., 0., 0.])), ('HT6W45', ': ', array([244, 1, 0, 1]), ' ', array([ 0.99186992, 0.00406504, 0. , 0.00406504]), ' ', array([ 1., 0., 0., 0.])), ('HT6W47', ': ', array([268, 0, 0, 1]), ' ', array([ 0.99628253, 0. , 0. , 0.00371747]), ' ', array([ 1., 0., 0., 0.])), ('HT6W48', ': ', array([240, 1…	100010	0.99667	0.0717776	1	1
666	21	16127736	AGAxAAG	G	A	[('HT6W37', ': ', array([ 1, 0, 0, 22]), ' ', array([ 0.04347826, 0. , 0. , 0.95652174]), ' ', array([ 0., 0., 0., 1.])), ('HT6W45', ': ', array([ 0, 0, 0, 41]), ' ', array([ 0., 0., 0., 1.]), ' ', array([ 0., 0., 0., 1.])), ('HT6W47', ': ', array([ 0, 1, 0, 44]), ' ', array([ 0. , 0.02222222, 0. , 0.97777778]), ' ', array([ 0., 0., 0., 1.])), ('HT6W48', ': ', array([ 0, 0, 0, 42]), ' ', array([ …	10110010	0.981457	0.497521	1	1
667	21	17615037	TTGxTTT	T	G	[('HT6W37', ': ', array([ 1, 26, 1, 0]), ' ', array([ 0.03571429, 0.92857143, 0.03571429, 0. ]), ' ', array([ 0., 1., 0., 0.])), ('HT6W45', ': ', array([ 0, 44, 1, 0]), ' ', array([ 0. , 0.97777778, 0.02222222, 0. ]), ' ', array([ 0., 1., 0., 0.])), ('HT6W47', ': ', array([ 0, 38, 0, 0]), ' ', array([ 0., 1., 0., 0.]), ' ', array([ 0., 1., 0., 0.])), ('HT6W48', ': ', array([ 0, 44, 0, 0]), ' ', a…	100010	0.989538	0.5	1	1
668	21	21904515	TGAxATA	G	A	[('HT6W37', ': ', array([ 0, 0, 0, 33]), ' ', array([ 0., 0., 0., 1.]), ' ', array([ 0., 0., 0., 1.])), ('HT6W45', ': ', array([ 0, 0, 0, 32]), ' ', array([ 0., 0., 0., 1.]), ' ', array([ 0., 0., 0., 1.])), ('HT6W47', ': ', array([ 0, 0, 0, 49]), ' ', array([ 0., 0., 0., 1.]), ' ', array([ 0., 0., 0., 1.])), ('HT6W48', ': ', array([ 0, 0, 0, 41]), ' ', array([ 0., 0., 0., 1.]), ' ', array([ 0., 0…	100010	0.993447	0.540155	1	1
669	21	22789091	TTTxATT	C	A	[('HT6W37', ': ', array([ 0, 0, 33, 0]), ' ', array([ 0., 0., 1., 0.]), ' ', array([ 0., 0., 1., 0.])), ('HT6W45', ': ', array([ 0, 0, 31, 0]), ' ', array([ 0., 0., 1., 0.]), ' ', array([ 0., 0., 1., 0.])), ('HT6W47', ': ', array([ 0, 0, 34, 0]), ' ', array([ 0., 0., 1., 0.]), ' ', array([ 0., 0., 1., 0.])), ('HT6W48', ': ', array([ 0, 0, 50, 0]), ' ', array([ 0., 0., 1., 0.]), ' ', array([ 0., 0…	10110010	0.996241	0.517019	1	1
670	21	25604374	ATTxTCT	C	A	[('HT6W37', ': ', array([ 0, 0, 30, 0]), ' ', array([ 0., 0., 1., 0.]), ' ', array([ 0., 0., 1., 0.])), ('HT6W45', ': ', array([ 0, 0, 37, 0]), ' ', array([ 0., 0., 1., 0.]), ' ', array([ 0., 0., 1., 0.])), ('HT6W47', ': ', array([ 0, 0, 44, 0]), ' ', array([ 0., 0., 1., 0.]), ' ', array([ 0., 0., 1., 0.])), ('HT6W48', ': ', array([ 0, 0, 30, 0]), ' ', array([ 0., 0., 1., 0.]), ' ', array([ 0., 0…	100010	1	0.473214	1	1
671	21	30488613	CATxTGG	C	A	[('HT6W37', ': ', array([ 0, 0, 48, 0]), ' ', array([ 0., 0., 1., 0.]), ' ', array([ 0., 0., 1., 0.])), ('HT6W45', ': ', array([ 2, 0, 36, 1]), ' ', array([ 0.05128205, 0. , 0.92307692, 0.02564103]), ' ', array([ 0., 0., 1., 0.])), ('HT6W47', ': ', array([ 1, 0, 43, 1]), ' ', array([ 0.02222222, 0. , 0.95555556, 0.02222222]), ' ', array([ 0., 0., 1., 0.])), ('HT6W48', ': ', array([ 0, 0, 26, 0]),…	100010	0.987579	0.324746	0.999976	1
672	21	36858580	AATxTGA	T	G	[('HT6W37', ': ', array([ 0, 30, 0, 0]), ' ', array([ 0., 1., 0., 0.]), ' ', array([ 0., 1., 0., 0.])), ('HT6W45', ': ', array([ 0, 37, 0, 0]), ' ', array([ 0., 1., 0., 0.]), ' ', array([ 0., 1., 0., 0.])), ('HT6W47', ': ', array([ 0, 32, 0, 0]), ' ', array([ 0., 1., 0., 0.]), ' ', array([ 0., 1., 0., 0.])), ('HT6W48', ': ', array([ 0, 31, 0, 0]), ' ', array([ 0., 1., 0., 0.]), ' ', array([ 0., 1…	100010	0.996296	0.50706	1	1
673	22	18520308	TCTxTCT	T	G	[('HT6W37', ': ', array([ 0, 44, 0, 0]), ' ', array([ 0., 1., 0., 0.]), ' ', array([ 0., 1., 0., 0.])), ('HT6W45', ': ', array([ 0, 48, 0, 0]), ' ', array([ 0., 1., 0., 0.]), ' ', array([ 0., 1., 0., 0.])), ('HT6W47', ': ', array([ 0, 48, 0, 0]), ' ', array([ 0., 1., 0., 0.]), ' ', array([ 0., 1., 0., 0.])), ('HT6W48', ': ', array([ 1, 33, 0, 0]), ' ', array([ 0.02941176, 0.97058824, 0. , 0. ]), …	10110010	0.989449	0.538776	1	1
674	22	21939534	CAAxCGA	A	G	[('HT6W37', ': ', array([39, 0, 0, 0]), ' ', array([ 1., 0., 0., 0.]), ' ', array([ 1., 0., 0., 0.])), ('HT6W45', ': ', array([27, 0, 1, 0]), ' ', array([ 0.96428571, 0. , 0.03571429, 0. ]), ' ', array([ 1., 0., 0., 0.])), ('HT6W47', ': ', array([38, 0, 1, 0]), ' ', array([ 0.97435897, 0. , 0.02564103, 0. ]), ' ', array([ 1., 0., 0., 0.])), ('HT6W48', ': ', array([46, 0, 0, 0]), ' ', array([ 1., …	100010	0.991006	0.469455	1	1
675	22	30316934	GAGxTAT	C	T	[('HT6W37', ': ', array([ 0, 0, 24, 0]), ' ', array([ 0., 0., 1., 0.]), ' ', array([ 0., 0., 1., 0.])), ('HT6W45', ': ', array([ 0, 0, 27, 1]), ' ', array([ 0. , 0. , 0.96428571, 0.03571429]), ' ', array([ 0., 0., 1., 0.])), ('HT6W47', ': ', array([ 0, 0, 32, 0]), ' ', array([ 0., 0., 1., 0.]), ' ', array([ 0., 0., 1., 0.])), ('HT6W48', ': ', array([ 0, 0, 32, 0]), ' ', array([ 0., 0., 1., 0.]), …	10110010	0.974131	0.642857	1	1
676	22	31028023	CACxTCC	G	A	[('HT6W37', ': ', array([ 0, 0, 1, 40]), ' ', array([ 0. , 0. , 0.02439024, 0.97560976]), ' ', array([ 0., 0., 0., 1.])), ('HT6W45', ': ', array([ 0, 0, 1, 34]), ' ', array([ 0. , 0. , 0.02857143, 0.97142857]), ' ', array([ 0., 0., 0., 1.])), ('HT6W47', ': ', array([ 0, 0, 0, 40]), ' ', array([ 0., 0., 0., 1.]), ' ', array([ 0., 0., 0., 1.])), ('HT6W48', ': ', array([ 0, 0, 0, 45]), ' ', array([ …	100010	0.979051	0.287037	0.999979	1
677	22	31559552	AATxATT	G	A	[('HT6W37', ': ', array([ 0, 0, 0, 36]), ' ', array([ 0., 0., 0., 1.]), ' ', array([ 0., 0., 0., 1.])), ('HT6W45', ': ', array([ 0, 0, 0, 41]), ' ', array([ 0., 0., 0., 1.]), ' ', array([ 0., 0., 0., 1.])), ('HT6W47', ': ', array([ 0, 0, 0, 43]), ' ', array([ 0., 0., 0., 1.]), ' ', array([ 0., 0., 0., 1.])), ('HT6W48', ': ', array([ 0, 0, 0, 46]), ' ', array([ 0., 0., 0., 1.]), ' ', array([ 0., 0…	100010	0.987515	0.41162	1	1
678	22	38292035	AGCxAGA	G	A	[('HT6W37', ': ', array([ 0, 0, 0, 37]), ' ', array([ 0., 0., 0., 1.]), ' ', array([ 0., 0., 0., 1.])), ('HT6W45', ': ', array([ 0, 0, 0, 42]), ' ', array([ 0., 0., 0., 1.]), ' ', array([ 0., 0., 0., 1.])), ('HT6W47', ': ', array([ 0, 0, 0, 39]), ' ', array([ 0., 0., 0., 1.]), ' ', array([ 0., 0., 0., 1.])), ('HT6W48', ': ', array([ 0, 0, 0, 35]), ' ', array([ 0., 0., 0., 1.]), ' ', array([ 0., 0…	10110010	0.996516	0.514559	1	1
679	22	51184884	AAAxAAG	G	T	[('HT6W37', ': ', array([ 0, 0, 0, 39]), ' ', array([ 0., 0., 0., 1.]), ' ', array([ 0., 0., 0., 1.])), ('HT6W45', ': ', array([ 0, 0, 1, 39]), ' ', array([ 0. , 0. , 0.025, 0.975]), ' ', array([ 0., 0., 0., 1.])), ('HT6W47', ': ', array([ 2, 0, 0, 40]), ' ', array([ 0.04761905, 0. , 0. , 0.95238095]), ' ', array([ 0., 0., 0., 1.])), ('HT6W48', ': ', array([ 1, 0, 0, 46]), ' ', array([ 0.0212766,…	10110010	0.950964	0.446038	1	1
680	X	47811341	AGAxATT	G	T	[('HT6W37', ': ', array([ 0, 0, 0, 14]), ' ', array([ 0., 0., 0., 1.]), ' ', array([ 0., 0., 0., 1.])), ('HT6W45', ': ', array([ 0, 0, 0, 25]), ' ', array([ 0., 0., 0., 1.]), ' ', array([ 0., 0., 0., 1.])), ('HT6W47', ': ', array([ 1, 0, 1, 23]), ' ', array([ 0.04, 0. , 0.04, 0.92]), ' ', array([ 0., 0., 0., 1.])), ('HT6W48', ': ', array([ 0, 0, 0, 24]), ' ', array([ 0., 0., 0., 1.]), ' ', array(…	100010	0.991111	1	1	1
681	X	52971011	GGGxCCT	A	C	[('HT6W37', ': ', array([21, 0, 0, 0]), ' ', array([ 1., 0., 0., 0.]), ' ', array([ 1., 0., 0., 0.])), ('HT6W45', ': ', array([26, 0, 0, 0]), ' ', array([ 1., 0., 0., 0.]), ' ', array([ 1., 0., 0., 0.])), ('HT6W47', ': ', array([20, 0, 0, 0]), ' ', array([ 1., 0., 0., 0.]), ' ', array([ 1., 0., 0., 0.])), ('HT6W48', ': ', array([21, 0, 0, 0]), ' ', array([ 1., 0., 0., 0.]), ' ', array([ 1., 0., 0…	10110010	0.990424	0.574068	1	1
682	X	63864082	ATTxTAT	T	G	[('HT6W37', ': ', array([ 0, 15, 0, 0]), ' ', array([ 0., 1., 0., 0.]), ' ', array([ 0., 1., 0., 0.])), ('HT6W45', ': ', array([ 0, 19, 0, 0]), ' ', array([ 0., 1., 0., 0.]), ' ', array([ 0., 1., 0., 0.])), ('HT6W47', ': ', array([ 0, 20, 0, 0]), ' ', array([ 0., 1., 0., 0.]), ' ', array([ 0., 1., 0., 0.])), ('HT6W48', ': ', array([ 0, 24, 0, 0]), ' ', array([ 0., 1., 0., 0.]), ' ', array([ 0., 1…	10110010	0.993789	1	1	1
683	X	68673264	AACxACC	T	C	[('HT6W37', ': ', array([ 0, 21, 0, 0]), ' ', array([ 0., 1., 0., 0.]), ' ', array([ 0., 1., 0., 0.])), ('HT6W45', ': ', array([ 0, 18, 0, 0]), ' ', array([ 0., 1., 0., 0.]), ' ', array([ 0., 1., 0., 0.])), ('HT6W47', ': ', array([ 0, 17, 0, 0]), ' ', array([ 0., 1., 0., 0.]), ' ', array([ 0., 1., 0., 0.])), ('HT6W48', ': ', array([ 0, 28, 0, 1]), ' ', array([ 0. , 0.96551724, 0. , 0.03448276]), …	100010	0.983823	0.73059	1	1
684	X	68820262	AGAxAGA	G	A	[('HT6W37', ': ', array([ 0, 0, 0, 15]), ' ', array([ 0., 0., 0., 1.]), ' ', array([ 0., 0., 0., 1.])), ('HT6W45', ': ', array([ 0, 0, 0, 17]), ' ', array([ 0., 0., 0., 1.]), ' ', array([ 0., 0., 0., 1.])), ('HT6W47', ': ', array([ 0, 0, 0, 22]), ' ', array([ 0., 0., 0., 1.]), ' ', array([ 0., 0., 0., 1.])), ('HT6W48', ': ', array([ 0, 0, 0, 23]), ' ', array([ 0., 0., 0., 1.]), ' ', array([ 0., 0…	100010	1	1	1	1
685	X	68827229	CATxAAT	T	G	[('HT6W37', ': ', array([ 0, 21, 0, 0]), ' ', array([ 0., 1., 0., 0.]), ' ', array([ 0., 1., 0., 0.])), ('HT6W45', ': ', array([ 0, 20, 0, 0]), ' ', array([ 0., 1., 0., 0.]), ' ', array([ 0., 1., 0., 0.])), ('HT6W47', ': ', array([ 0, 27, 0, 0]), ' ', array([ 0., 1., 0., 0.]), ' ', array([ 0., 1., 0., 0.])), ('HT6W48', ': ', array([ 0, 33, 0, 0]), ' ', array([ 0., 1., 0., 0.]), ' ', array([ 0., 1…	10110010	1	0.989583	1	1
686	X	70865586	CGGxGCG	C	T	[('HT6W37', ': ', array([ 0, 0, 20, 0]), ' ', array([ 0., 0., 1., 0.]), ' ', array([ 0., 0., 1., 0.])), ('HT6W45', ': ', array([0, 0, 9, 1]), ' ', array([ 0. , 0. , 0.9, 0.1]), ' ', array([ 0., 0., 1., 0.])), ('HT6W47', ': ', array([ 0, 0, 18, 0]), ' ', array([ 0., 0., 1., 0.]), ' ', array([ 0., 0., 1., 0.])), ('HT6W48', ': ', array([ 0, 0, 17, 0]), ' ', array([ 0., 0., 1., 0.]), ' ', array([ 0.,…	10110010	1	0.965814	1	1
687	X	82089502	TGTxTAC	C	T	[('HT6W37', ': ', array([ 0, 0, 18, 0]), ' ', array([ 0., 0., 1., 0.]), ' ', array([ 0., 0., 1., 0.])), ('HT6W45', ': ', array([ 0, 0, 17, 0]), ' ', array([ 0., 0., 1., 0.]), ' ', array([ 0., 0., 1., 0.])), ('HT6W47', ': ', array([ 1, 0, 22, 0]), ' ', array([ 0.04347826, 0. , 0.95652174, 0. ]), ' ', array([ 0., 0., 1., 0.])), ('HT6W48', ': ', array([ 0, 1, 18, 0]), ' ', array([ 0. , 0.05263158, 0…	10110010	0.98627	0.985294	1	1
688	X	93276058	AATxTTT	C	A	[('HT6W37', ': ', array([ 0, 0, 13, 0]), ' ', array([ 0., 0., 1., 0.]), ' ', array([ 0., 0., 1., 0.])), ('HT6W45', ': ', array([ 0, 0, 15, 0]), ' ', array([ 0., 0., 1., 0.]), ' ', array([ 0., 0., 1., 0.])), ('HT6W47', ': ', array([ 0, 0, 24, 0]), ' ', array([ 0., 0., 1., 0.]), ' ', array([ 0., 0., 1., 0.])), ('HT6W48', ': ', array([ 0, 0, 16, 0]), ' ', array([ 0., 0., 1., 0.]), ' ', array([ 0., 0…	100010	1	1	1	1
689	X	99091652	GGCxTCA	C	G	[('HT6W37', ': ', array([ 0, 0, 14, 1]), ' ', array([ 0. , 0. , 0.93333333, 0.06666667]), ' ', array([ 0., 0., 1., 0.])), ('HT6W45', ': ', array([ 0, 0, 19, 1]), ' ', array([ 0. , 0. , 0.95, 0.05]), ' ', array([ 0., 0., 1., 0.])), ('HT6W47', ': ', array([ 0, 0, 13, 0]), ' ', array([ 0., 0., 1., 0.]), ' ', array([ 0., 0., 1., 0.])), ('HT6W48', ': ', array([ 0, 0, 20, 0]), ' ', array([ 0., 0., 1., …	10110010	0.971995	0.986842	1	1
690	X	110160305	AAAxGCT	A	G	[('HT6W37', ': ', array([18, 0, 0, 0]), ' ', array([ 1., 0., 0., 0.]), ' ', array([ 1., 0., 0., 0.])), ('HT6W45', ': ', array([15, 0, 0, 0]), ' ', array([ 1., 0., 0., 0.]), ' ', array([ 1., 0., 0., 0.])), ('HT6W47', ': ', array([22, 0, 0, 0]), ' ', array([ 1., 0., 0., 0.]), ' ', array([ 1., 0., 0., 0.])), ('HT6W48', ': ', array([15, 0, 0, 0]), ' ', array([ 1., 0., 0., 0.]), ' ', array([ 1., 0., 0…	10110010	0.992857	0.991379	1	1
691	X	112041243	CCTxTCT	C	A	[('HT6W37', ': ', array([ 0, 0, 20, 0]), ' ', array([ 0., 0., 1., 0.]), ' ', array([ 0., 0., 1., 0.])), ('HT6W45', ': ', array([ 0, 0, 14, 0]), ' ', array([ 0., 0., 1., 0.]), ' ', array([ 0., 0., 1., 0.])), ('HT6W47', ': ', array([ 0, 0, 19, 0]), ' ', array([ 0., 0., 1., 0.]), ' ', array([ 0., 0., 1., 0.])), ('HT6W48', ': ', array([ 0, 0, 23, 0]), ' ', array([ 0., 0., 1., 0.]), ' ', array([ 0., 0…	100010	0.994444	0.977273	1	1
692	X	113060818	TCAxTTC	C	T	[('HT6W37', ': ', array([ 0, 0, 23, 0]), ' ', array([ 0., 0., 1., 0.]), ' ', array([ 0., 0., 1., 0.])), ('HT6W45', ': ', array([ 0, 0, 14, 0]), ' ', array([ 0., 0., 1., 0.]), ' ', array([ 0., 0., 1., 0.])), ('HT6W47', ': ', array([ 0, 0, 20, 0]), ' ', array([ 0., 0., 1., 0.]), ' ', array([ 0., 0., 1., 0.])), ('HT6W48', ': ', array([ 0, 0, 28, 0]), ' ', array([ 0., 0., 1., 0.]), ' ', array([ 0., 0…	10110010	1	1	1	1
693	X	124944296	CTGxATT	T	C	[('HT6W37', ': ', array([ 0, 19, 0, 0]), ' ', array([ 0., 1., 0., 0.]), ' ', array([ 0., 1., 0., 0.])), ('HT6W45', ': ', array([ 0, 20, 0, 0]), ' ', array([ 0., 1., 0., 0.]), ' ', array([ 0., 1., 0., 0.])), ('HT6W47', ': ', array([ 0, 20, 0, 0]), ' ', array([ 0., 1., 0., 0.]), ' ', array([ 0., 1., 0., 0.])), ('HT6W48', ': ', array([ 0, 28, 0, 0]), ' ', array([ 0., 1., 0., 0.]), ' ', array([ 0., 1…	10110010	1	0.978261	1	1
694	X	137976236	CAGxAAA	C	A	[('HT6W37', ': ', array([ 0, 0, 23, 0]), ' ', array([ 0., 0., 1., 0.]), ' ', array([ 0., 0., 1., 0.])), ('HT6W45', ': ', array([ 0, 0, 19, 0]), ' ', array([ 0., 0., 1., 0.]), ' ', array([ 0., 0., 1., 0.])), ('HT6W47', ': ', array([ 0, 0, 17, 0]), ' ', array([ 0., 0., 1., 0.]), ' ', array([ 0., 0., 1., 0.])), ('HT6W48', ': ', array([ 0, 0, 25, 0]), ' ', array([ 0., 0., 1., 0.]), ' ', array([ 0., 0…	10110010	1	1	1	1
695	X	152707365	TTGxATA	C	A	[('HT6W37', ': ', array([ 0, 0, 19, 0]), ' ', array([ 0., 0., 1., 0.]), ' ', array([ 0., 0., 1., 0.])), ('HT6W45', ': ', array([ 0, 0, 13, 0]), ' ', array([ 0., 0., 1., 0.]), ' ', array([ 0., 0., 1., 0.])), ('HT6W47', ': ', array([ 0, 0, 24, 0]), ' ', array([ 0., 0., 1., 0.]), ' ', array([ 0., 0., 1., 0.])), ('HT6W48', ': ', array([ 0, 0, 21, 0]), ' ', array([ 0., 0., 1., 0.]), ' ', array([ 0., 0…	10110010	0.983135	1	1	1
696	GL000214.1	75180	TTAxCTA	A	G	[('HT6W37', ': ', array([181, 1, 0, 1]), ' ', array([ 0.98907104, 0.00546448, 0. , 0.00546448]), ' ', array([ 1., 0., 0., 0.])), ('HT6W45', ': ', array([203, 0, 2, 0]), ' ', array([ 0.9902439, 0. , 0.0097561, 0. ]), ' ', array([ 1., 0., 0., 0.])), ('HT6W47', ': ', array([210, 0, 1, 0]), ' ', array([ 0.99526066, 0. , 0.00473934, 0. ]), ' ', array([ 1., 0., 0., 0.])), ('HT6W48', ': ', array([182, 0…	100010	0.9908	0.0966104	1	1
697	GL000219.1	54087	AGAxCTG	G	A	[('HT6W37', ': ', array([ 0, 1, 0, 193]), ' ', array([ 0. , 0.00515464, 0. , 0.99484536]), ' ', array([ 0., 0., 0., 1.])), ('HT6W45', ': ', array([ 0, 0, 0, 163]), ' ', array([ 0., 0., 0., 1.]), ' ', array([ 0., 0., 0., 1.])), ('HT6W47', ': ', array([ 0, 0, 0, 143]), ' ', array([ 0., 0., 0., 1.]), ' ', array([ 0., 0., 0., 1.])), ('HT6W48', ': ', array([ 0, 1, 1, 177]), ' ', array([ 0. , 0.0055865…	10110010	0.994841	0.097358	1	1
698	GL000224.1	32247	TTTxTTG	C	A	[('HT6W37', ': ', array([ 1, 1, 210, 0]), ' ', array([ 0.00471698, 0.00471698, 0.99056604, 0. ]), ' ', array([ 0., 0., 1., 0.])), ('HT6W45', ': ', array([ 1, 0, 188, 0]), ' ', array([ 0.00529101, 0. , 0.99470899, 0. ]), ' ', array([ 0., 0., 1., 0.])), ('HT6W47', ': ', array([ 0, 1, 204, 0]), ' ', array([ 0. , 0.00487805, 0.99512195, 0. ]), ' ', array([ 0., 0., 1., 0.])), ('HT6W48', ': ', array([ …	10110010	0.993225	0.087874	1	1
699	GL000192.1	323428	AGTxAGT	T	C	[('HT6W37', ': ', array([ 0, 42, 0, 0]), ' ', array([ 0., 1., 0., 0.]), ' ', array([ 0., 1., 0., 0.])), ('HT6W45', ': ', array([ 0, 37, 0, 0]), ' ', array([ 0., 1., 0., 0.]), ' ', array([ 0., 1., 0., 0.])), ('HT6W47', ': ', array([ 0, 44, 0, 0]), ' ', array([ 0., 1., 0., 0.]), ' ', array([ 0., 1., 0., 0.])), ('HT6W48', ': ', array([ 0, 37, 1, 0]), ' ', array([ 0. , 0.97368421, 0.02631579, 0. ]), …	10110010	0.996241	0.467329	1	1
700	13	77905611	GATxTTT	T	G	[('HT6W37', ': ', array([ 0, 22, 0, 0]), ' ', array([ 0., 1., 0., 0.]), ' ', array([ 0., 1., 0., 0.])), ('HT6W45', ': ', array([0, 9, 0, 0]), ' ', array([ 0., 1., 0., 0.]), ' ', array([ 0., 1., 0., 0.])), ('HT6W47', ': ', array([ 0, 17, 0, 0]), ' ', array([ 0., 1., 0., 0.]), ' ', array([ 0., 1., 0., 0.])), ('HT6W48', ': ', array([ 0, 16, 0, 0]), ' ', array([ 0., 1., 0., 0.]), ' ', array([ 0., 1.,…	100010	0.981005	0.957071	1	1
701	1	14907779	CACxTGC	T	G	[('HT6W37', ': ', array([ 0, 52, 0, 2]), ' ', array([ 0. , 0.96296296, 0. , 0.03703704]), ' ', array([ 0., 1., 0., 0.])), ('HT6W45', ': ', array([ 0, 11, 0, 27]), ' ', array([ 0. , 0.28947368, 0. , 0.71052632]), ' ', array([ 0., 1., 0., 1.])), ('HT6W47', ': ', array([ 0, 45, 0, 0]), ' ', array([ 0., 1., 0., 0.]), ' ', array([ 0., 1., 0., 0.])), ('HT6W48', ': ', array([ 0, 26, 0, 14]), ' ', array(…	10110111111	0.97785	0.474867	1	1
702	1	77524166	GGCxCCT	A	G	[('HT6W37', ': ', array([31, 0, 0, 2]), ' ', array([ 0.93939394, 0. , 0. , 0.06060606]), ' ', array([ 1., 0., 0., 0.])), ('HT6W45', ': ', array([18, 0, 0, 30]), ' ', array([ 0.375, 0. , 0. , 0.625]), ' ', array([ 1., 0., 0., 1.])), ('HT6W47', ': ', array([42, 0, 2, 1]), ' ', array([ 0.93333333, 0. , 0.04444444, 0.02222222]), ' ', array([ 1., 0., 0., 0.])), ('HT6W48', ': ', array([22, 1, 0, 15]), …	10110111111	0.948052	0.515522	1	1
703	1	82958543	GTTxTTT	G	T	[('HT6W37', ': ', array([ 0, 1, 0, 35]), ' ', array([ 0. , 0.02777778, 0. , 0.97222222]), ' ', array([ 0., 0., 0., 1.])), ('HT6W45', ': ', array([ 0, 18, 0, 16]), ' ', array([ 0. , 0.52941176, 0. , 0.47058824]), ' ', array([ 0., 1., 0., 1.])), ('HT6W47', ': ', array([ 0, 1, 0, 37]), ' ', array([ 0. , 0.02631579, 0. , 0.97368421]), ' ', array([ 0., 0., 0., 1.])), ('HT6W48', ': ', array([ 0, 19, 0,…	10110111111	0.981969	0.516843	1	1
704	1	96543798	TGAxTTT	C	A	[('HT6W37', ': ', array([ 1, 0, 27, 0]), ' ', array([ 0.03571429, 0. , 0.96428571, 0. ]), ' ', array([ 0., 0., 1., 0.])), ('HT6W45', ': ', array([14, 0, 19, 0]), ' ', array([ 0.42424242, 0. , 0.57575758, 0. ]), ' ', array([ 1., 0., 1., 0.])), ('HT6W47', ': ', array([ 0, 0, 55, 0]), ' ', array([ 0., 0., 1., 0.]), ' ', array([ 0., 0., 1., 0.])), ('HT6W48', ': ', array([30, 0, 26, 0]), ' ', array([ …	10110111111	0.988095	0.489363	1	1
705	1	193905429	TTTxCAA	G	A	[('HT6W37', ': ', array([ 1, 0, 0, 26]), ' ', array([ 0.03703704, 0. , 0. , 0.96296296]), ' ', array([ 0., 0., 0., 1.])), ('HT6W45', ': ', array([22, 0, 0, 20]), ' ', array([ 0.52380952, 0. , 0. , 0.47619048]), ' ', array([ 1., 0., 0., 1.])), ('HT6W47', ': ', array([ 0, 0, 0, 50]), ' ', array([ 0., 0., 0., 1.]), ' ', array([ 0., 0., 0., 1.])), ('HT6W48', ': ', array([32, 0, 0, 12]), ' ', array([ …	10110111111	0.987654	0.557306	1	1
706	1	208171803	TTCxTCT	T	C	[('HT6W37', ': ', array([ 0, 34, 1, 0]), ' ', array([ 0. , 0.97142857, 0.02857143, 0. ]), ' ', array([ 0., 1., 0., 0.])), ('HT6W45', ': ', array([ 0, 19, 18, 0]), ' ', array([ 0. , 0.51351351, 0.48648649, 0. ]), ' ', array([ 0., 1., 1., 0.])), ('HT6W47', ': ', array([ 0, 40, 0, 0]), ' ', array([ 0., 1., 0., 0.]), ' ', array([ 0., 1., 0., 0.])), ('HT6W48', ': ', array([ 0, 23, 18, 0]), ' ', array(…	10110111111	0.990476	0.524386	1	1
707	2	16706601	CTGxTGT	T	C	[('HT6W37', ': ', array([ 0, 36, 0, 0]), ' ', array([ 0., 1., 0., 0.]), ' ', array([ 0., 1., 0., 0.])), ('HT6W45', ': ', array([ 0, 13, 20, 0]), ' ', array([ 0. , 0.39393939, 0.60606061, 0. ]), ' ', array([ 0., 1., 1., 0.])), ('HT6W47', ': ', array([ 0, 33, 0, 0]), ' ', array([ 0., 1., 0., 0.]), ' ', array([ 0., 1., 0., 0.])), ('HT6W48', ': ', array([ 0, 21, 21, 0]), ' ', array([ 0. , 0.5, 0.5, 0…	10110111111	1	0.519691	1	1
708	2	71507354	ACCxTGA	T	C	[('HT6W37', ': ', array([ 0, 27, 1, 0]), ' ', array([ 0. , 0.96428571, 0.03571429, 0. ]), ' ', array([ 0., 1., 0., 0.])), ('HT6W45', ': ', array([ 0, 19, 20, 0]), ' ', array([ 0. , 0.48717949, 0.51282051, 0. ]), ' ', array([ 0., 1., 1., 0.])), ('HT6W47', ': ', array([ 0, 25, 0, 2]), ' ', array([ 0. , 0.92592593, 0. , 0.07407407]), ' ', array([ 0., 1., 0., 0.])), ('HT6W48', ': ', array([ 1, 11, 25…	10110111111	0.963404	0.502116	1	1
709	3	1336283	ACAxGAT	A	C	[('HT6W37', ': ', array([31, 0, 0, 0]), ' ', array([ 1., 0., 0., 0.]), ' ', array([ 1., 0., 0., 0.])), ('HT6W45', ': ', array([12, 0, 29, 0]), ' ', array([ 0.29268293, 0. , 0.70731707, 0. ]), ' ', array([ 1., 0., 1., 0.])), ('HT6W47', ': ', array([50, 0, 0, 0]), ' ', array([ 1., 0., 0., 0.]), ' ', array([ 1., 0., 0., 0.])), ('HT6W48', ': ', array([13, 0, 13, 0]), ' ', array([ 0.5, 0. , 0.5, 0. ])…	10110111111	1	0.507153	1	1
710	3	20106684	TGGxTCT	T	C	[('HT6W37', ': ', array([ 0, 40, 1, 0]), ' ', array([ 0. , 0.97560976, 0.02439024, 0. ]), ' ', array([ 0., 1., 0., 0.])), ('HT6W45', ': ', array([ 0, 20, 23, 0]), ' ', array([ 0. , 0.46511628, 0.53488372, 0. ]), ' ', array([ 0., 1., 1., 0.])), ('HT6W47', ': ', array([ 0, 40, 0, 0]), ' ', array([ 0., 1., 0., 0.]), ' ', array([ 0., 1., 0., 0.])), ('HT6W48', ': ', array([ 0, 25, 29, 0]), ' ', array(…	10110111111	0.982066	0.553216	1	1
711	3	35174214	TGTxATA	G	T	[('HT6W37', ': ', array([ 0, 1, 1, 33]), ' ', array([ 0. , 0.02857143, 0.02857143, 0.94285714]), ' ', array([ 0., 0., 0., 1.])), ('HT6W45', ': ', array([ 0, 23, 0, 14]), ' ', array([ 0. , 0.62162162, 0. , 0.37837838]), ' ', array([ 0., 1., 0., 1.])), ('HT6W47', ': ', array([ 0, 0, 0, 47]), ' ', array([ 0., 0., 0., 1.]), ' ', array([ 0., 0., 0., 1.])), ('HT6W48', ': ', array([ 1, 27, 0, 18]), ' ',…	10110111111	0.980952	0.475552	1	1
712	3	35261961	ATGxTGT	C	T	[('HT6W37', ': ', array([ 0, 1, 35, 0]), ' ', array([ 0. , 0.02777778, 0.97222222, 0. ]), ' ', array([ 0., 0., 1., 0.])), ('HT6W45', ': ', array([ 0, 22, 19, 0]), ' ', array([ 0. , 0.53658537, 0.46341463, 0. ]), ' ', array([ 0., 1., 1., 0.])), ('HT6W47', ': ', array([ 0, 0, 35, 0]), ' ', array([ 0. , 0. , 0.97222222, 0. ]), ' ', array([ 0., 0., 1., 0.])), ('HT6W48', ': ', array([ 0, 22, 29, 0]), …	10110111111	0.990741	0.469075	1	1
713	3	54947735	AAAxGAT	G	A	[('HT6W37', ': ', array([ 1, 0, 0, 31]), ' ', array([ 0.03125, 0. , 0. , 0.96875]), ' ', array([ 0., 0., 0., 1.])), ('HT6W45', ': ', array([14, 0, 1, 22]), ' ', array([ 0.37837838, 0. , 0.02702703, 0.59459459]), ' ', array([ 1., 0., 0., 1.])), ('HT6W47', ': ', array([ 0, 0, 0, 34]), ' ', array([ 0., 0., 0., 1.]), ' ', array([ 0., 0., 0., 1.])), ('HT6W48', ': ', array([21, 0, 0, 20]), ' ', array([…	10110111111	0.989583	0.535403	1	1
714	3	57149219	AACxAAA	A	C	[('HT6W37', ': ', array([27, 0, 1, 0]), ' ', array([ 0.96428571, 0. , 0.03571429, 0. ]), ' ', array([ 1., 0., 0., 0.])), ('HT6W45', ': ', array([19, 0, 16, 0]), ' ', array([ 0.54285714, 0. , 0.45714286, 0. ]), ' ', array([ 1., 0., 1., 0.])), ('HT6W47', ': ', array([43, 0, 0, 0]), ' ', array([ 1., 0., 0., 0.]), ' ', array([ 1., 0., 0., 0.])), ('HT6W48', ': ', array([24, 0, 22, 0]), ' ', array([ 0.…	10110111111	0.988095	0.444532	1	1
715	3	57364922	AAAxCAA	T	C	[('HT6W37', ': ', array([ 0, 39, 3, 0]), ' ', array([ 0. , 0.92857143, 0.07142857, 0. ]), ' ', array([ 0., 1., 0., 0.])), ('HT6W45', ': ', array([ 0, 30, 15, 0]), ' ', array([ 0. , 0.66666667, 0.33333333, 0. ]), ' ', array([ 0., 1., 1., 0.])), ('HT6W47', ': ', array([ 0, 62, 0, 1]), ' ', array([ 0. , 0.98412698, 0. , 0.01587302]), ' ', array([ 0., 1., 0., 0.])), ('HT6W48', ': ', array([ 0, 32, 18…	10110111111	0.970899	0.314972	0.999981	1
716	3	64645852	AAAxTAG	A	T	[('HT6W37', ': ', array([27, 0, 0, 0]), ' ', array([ 1., 0., 0., 0.]), ' ', array([ 1., 0., 0., 0.])), ('HT6W45', ': ', array([14, 15, 0, 0]), ' ', array([ 0.48275862, 0.51724138, 0. , 0. ]), ' ', array([ 1., 1., 0., 0.])), ('HT6W47', ': ', array([47, 0, 1, 0]), ' ', array([ 0.97916667, 0. , 0.02083333, 0. ]), ' ', array([ 1., 0., 0., 0.])), ('HT6W48', ': ', array([27, 27, 0, 0]), ' ', array([ 0.…	10110111111	0.976389	0.485285	1	1
717	3	77150904	AAAxTTG	A	C	[('HT6W37', ': ', array([40, 0, 1, 0]), ' ', array([ 0.97560976, 0. , 0.02439024, 0. ]), ' ', array([ 1., 0., 0., 0.])), ('HT6W45', ': ', array([25, 0, 18, 0]), ' ', array([ 0.58139535, 0. , 0.41860465, 0. ]), ' ', array([ 1., 0., 1., 0.])), ('HT6W47', ': ', array([33, 0, 1, 1]), ' ', array([ 0.94285714, 0. , 0.02857143, 0.02857143]), ' ', array([ 1., 0., 0., 0.])), ('HT6W48', ': ', array([24, 0,…	10110111111	0.972822	0.498264	0.999999	1
718	3	78783733	AAAxACT	G	T	[('HT6W37', ': ', array([ 1, 0, 0, 19]), ' ', array([ 0.05, 0. , 0. , 0.95]), ' ', array([ 0., 0., 0., 1.])), ('HT6W45', ': ', array([ 0, 13, 0, 19]), ' ', array([ 0. , 0.40625, 0. , 0.59375]), ' ', array([ 0., 1., 0., 1.])), ('HT6W47', ': ', array([ 2, 0, 0, 43]), ' ', array([ 0.04444444, 0. , 0. , 0.95555556]), ' ', array([ 0., 0., 0., 1.])), ('HT6W48', ': ', array([ 1, 10, 1, 13]), ' ', array(…	10110111111	0.968519	0.47147	0.999997	1
719	3	97446434	TAAxGGT	T	C	[('HT6W37', ': ', array([ 0, 37, 1, 0]), ' ', array([ 0. , 0.97368421, 0.02631579, 0. ]), ' ', array([ 0., 1., 0., 0.])), ('HT6W45', ': ', array([ 0, 20, 12, 0]), ' ', array([ 0. , 0.625, 0.375, 0. ]), ' ', array([ 0., 1., 1., 0.])), ('HT6W47', ': ', array([ 0, 38, 0, 0]), ' ', array([ 0., 1., 0., 0.]), ' ', array([ 0., 1., 0., 0.])), ('HT6W48', ': ', array([ 0, 17, 19, 0]), ' ', array([ 0. , 0.4…	10110111111	0.991228	0.489717	1	1
720	3	151295202	AAAxACT	G	T	[('HT6W37', ': ', array([ 0, 2, 0, 43]), ' ', array([ 0. , 0.04444444, 0. , 0.95555556]), ' ', array([ 0., 0., 0., 1.])), ('HT6W45', ': ', array([ 0, 17, 0, 17]), ' ', array([ 0. , 0.5, 0. , 0.5]), ' ', array([ 0., 1., 0., 1.])), ('HT6W47', ': ', array([ 0, 0, 0, 55]), ' ', array([ 0., 0., 0., 1.]), ' ', array([ 0., 0., 0., 1.])), ('HT6W48', ': ', array([ 0, 22, 0, 24]), ' ', array([ 0. , 0.47826…	10110111111	0.978241	0.497054	1	1
721	3	161530290	TTTxTTT	A	G	[('HT6W37', ': ', array([33, 0, 0, 1]), ' ', array([ 0.97058824, 0. , 0. , 0.02941176]), ' ', array([ 1., 0., 0., 0.])), ('HT6W45', ': ', array([12, 0, 0, 22]), ' ', array([ 0.35294118, 0. , 0. , 0.64705882]), ' ', array([ 1., 0., 0., 1.])), ('HT6W47', ': ', array([39, 0, 0, 0]), ' ', array([ 1., 0., 0., 0.]), ' ', array([ 1., 0., 0., 0.])), ('HT6W48', ': ', array([24, 1, 0, 30]), ' ', array([ 0.…	10110111111	0.990196	0.539004	1	1
722	3	172016564	ACAxATT	G	T	[('HT6W37', ': ', array([ 0, 3, 0, 37]), ' ', array([ 0. , 0.075, 0. , 0.925]), ' ', array([ 0., 0., 0., 1.])), ('HT6W45', ': ', array([ 0, 22, 0, 18]), ' ', array([ 0. , 0.55, 0. , 0.45]), ' ', array([ 0., 1., 0., 1.])), ('HT6W47', ': ', array([ 0, 0, 0, 51]), ' ', array([ 0., 0., 0., 1.]), ' ', array([ 0., 0., 0., 1.])), ('HT6W48', ': ', array([ 0, 15, 0, 18]), ' ', array([ 0. , 0.45454545, 0. …	10110111111	0.975	0.522141	1	1
723	3	187333027	TATxTCC	C	A	[('HT6W37', ': ', array([ 0, 0, 42, 0]), ' ', array([ 0., 0., 1., 0.]), ' ', array([ 0., 0., 1., 0.])), ('HT6W45', ': ', array([20, 0, 13, 1]), ' ', array([ 0.58823529, 0. , 0.38235294, 0.02941176]), ' ', array([ 1., 0., 1., 0.])), ('HT6W47', ': ', array([ 0, 1, 49, 0]), ' ', array([ 0. , 0.02, 0.98, 0. ]), ' ', array([ 0., 0., 1., 0.])), ('HT6W48', ': ', array([15, 0, 18, 0]), ' ', array([ 0.454…	10110111111	0.993333	0.489014	1	1
724	5	6828317	ATCxGCA	A	C	[('HT6W37', ': ', array([90, 0, 1, 0]), ' ', array([ 0.97826087, 0. , 0.01086957, 0. ]), ' ', array([ 1., 0., 0., 0.])), ('HT6W45', ': ', array([70, 1, 19, 0]), ' ', array([ 0.77777778, 0.01111111, 0.21111111, 0. ]), ' ', array([ 1., 0., 1., 0.])), ('HT6W47', ': ', array([91, 0, 0, 0]), ' ', array([ 1., 0., 0., 0.]), ' ', array([ 1., 0., 0., 0.])), ('HT6W48', ': ', array([75, 0, 27, 0]), ' ', arr…	10110111111	0.986081	0.223428	1	1
725	5	24586862	TAAxTCT	C	A	[('HT6W37', ': ', array([ 2, 1, 79, 0]), ' ', array([ 0.02439024, 0.01219512, 0.96341463, 0. ]), ' ', array([ 0., 0., 1., 0.])), ('HT6W45', ': ', array([21, 0, 51, 0]), ' ', array([ 0.29166667, 0. , 0.70833333, 0. ]), ' ', array([ 1., 0., 1., 0.])), ('HT6W47', ': ', array([ 1, 0, 72, 0]), ' ', array([ 0.01369863, 0. , 0.98630137, 0. ]), ' ', array([ 0., 0., 1., 0.])), ('HT6W48', ': ', array([22, …	10110111111	0.978734	0.252023	0.995345	1
726	5	29485882	TTTxTTG	T	G	[('HT6W37', ': ', array([ 0, 64, 0, 1]), ' ', array([ 0. , 0.98461538, 0. , 0.01538462]), ' ', array([ 0., 1., 0., 0.])), ('HT6W45', ': ', array([ 0, 48, 0, 15]), ' ', array([ 0. , 0.76190476, 0. , 0.23809524]), ' ', array([ 0., 1., 0., 1.])), ('HT6W47', ': ', array([ 0, 90, 0, 0]), ' ', array([ 0., 1., 0., 0.]), ' ', array([ 0., 1., 0., 0.])), ('HT6W48', ': ', array([ 0, 57, 0, 11]), ' ', array(…	10110111111	0.994872	0.251965	1	1
727	5	45196007	TAAxAAT	T	C	[('HT6W37', ': ', array([ 0, 93, 1, 0]), ' ', array([ 0. , 0.9893617, 0.0106383, 0. ]), ' ', array([ 0., 1., 0., 0.])), ('HT6W45', ': ', array([ 1, 58, 19, 0]), ' ', array([ 0.01282051, 0.74358974, 0.24358974, 0. ]), ' ', array([ 0., 1., 1., 0.])), ('HT6W47', ': ', array([ 0, 81, 0, 0]), ' ', array([ 0., 1., 0., 0.]), ' ', array([ 0., 1., 0., 0.])), ('HT6W48', ': ', array([ 1, 48, 21, 0]), ' ', a…	10110111111	0.992622	0.262751	1	1
728	6	27166881	CATxTTA	T	G	[('HT6W37', ': ', array([ 0, 29, 0, 1]), ' ', array([ 0. , 0.96666667, 0. , 0.03333333]), ' ', array([ 0., 1., 0., 0.])), ('HT6W45', ': ', array([ 0, 17, 0, 21]), ' ', array([ 0. , 0.44736842, 0. , 0.55263158]), ' ', array([ 0., 1., 0., 1.])), ('HT6W47', ': ', array([ 0, 34, 0, 0]), ' ', array([ 0., 1., 0., 0.]), ' ', array([ 0., 1., 0., 0.])), ('HT6W48', ': ', array([ 0, 26, 0, 21]), ' ', array(…	10110111111	0.988889	0.448546	1	1
729	6	29569303	ACTxTCC	C	A	[('HT6W37', ': ', array([ 0, 1, 40, 0]), ' ', array([ 0. , 0.02439024, 0.97560976, 0. ]), ' ', array([ 0., 0., 1., 0.])), ('HT6W45', ': ', array([20, 0, 20, 0]), ' ', array([ 0.5, 0. , 0.5, 0. ]), ' ', array([ 1., 0., 1., 0.])), ('HT6W47', ': ', array([ 0, 0, 44, 0]), ' ', array([ 0., 0., 1., 0.]), ' ', array([ 0., 0., 1., 0.])), ('HT6W48', ': ', array([24, 0, 28, 0]), ' ', array([ 0.46153846, 0.…	10110111111	0.99187	0.494618	1	1
730	6	31484858	TGTxTCA	C	A	[('HT6W37', ': ', array([ 1, 0, 34, 0]), ' ', array([ 0.02857143, 0. , 0.97142857, 0. ]), ' ', array([ 0., 0., 1., 0.])), ('HT6W45', ': ', array([16, 1, 16, 0]), ' ', array([ 0.48484848, 0.03030303, 0.48484848, 0. ]), ' ', array([ 1., 0., 1., 0.])), ('HT6W47', ': ', array([ 0, 0, 38, 0]), ' ', array([ 0., 0., 1., 0.]), ' ', array([ 0., 0., 1., 0.])), ('HT6W48', ': ', array([15, 0, 19, 0]), ' ', a…	10110111111	0.990476	0.477332	1	1
731	6	44173080	CAAxTAT	T	G	[('HT6W37', ': ', array([ 0, 41, 0, 2]), ' ', array([ 0. , 0.95348837, 0. , 0.04651163]), ' ', array([ 0., 1., 0., 0.])), ('HT6W45', ': ', array([ 0, 23, 0, 26]), ' ', array([ 0. , 0.46938776, 0. , 0.53061224]), ' ', array([ 0., 1., 0., 1.])), ('HT6W47', ': ', array([ 1, 34, 0, 0]), ' ', array([ 0.02857143, 0.97142857, 0. , 0. ]), ' ', array([ 0., 1., 0., 0.])), ('HT6W48', ': ', array([ 0, 22, 0,…	10110111111	0.958306	0.494566	1	1
732	6	51886036	GTTxTTT	C	A	[('HT6W37', ': ', array([ 0, 0, 49, 0]), ' ', array([ 0., 0., 1., 0.]), ' ', array([ 0., 0., 1., 0.])), ('HT6W45', ': ', array([20, 0, 16, 0]), ' ', array([ 0.55555556, 0. , 0.44444444, 0. ]), ' ', array([ 1., 0., 1., 0.])), ('HT6W47', ': ', array([ 0, 1, 44, 1]), ' ', array([ 0. , 0.02173913, 0.95652174, 0.02173913]), ' ', array([ 0., 0., 1., 0.])), ('HT6W48', ': ', array([25, 0, 29, 0]), ' ', a…	10110111111	0.985507	0.506608	1	1
733	6	57612840	CTCxCTC	C	T	[('HT6W37', ': ', array([ 0, 1, 34, 0]), ' ', array([ 0. , 0.02857143, 0.97142857, 0. ]), ' ', array([ 0., 0., 1., 0.])), ('HT6W45', ': ', array([ 0, 20, 25, 0]), ' ', array([ 0. , 0.44444444, 0.55555556, 0. ]), ' ', array([ 0., 1., 1., 0.])), ('HT6W47', ': ', array([ 0, 1, 29, 0]), ' ', array([ 0. , 0.03333333, 0.96666667, 0. ]), ' ', array([ 0., 0., 1., 0.])), ('HT6W48', ': ', array([ 1, 21, 23…	10110111111	0.979365	0.45386	1	1
734	6	57864181	TTCxCCT	A	G	[('HT6W37', ': ', array([50, 0, 0, 1]), ' ', array([ 0.98039216, 0. , 0. , 0.01960784]), ' ', array([ 1., 0., 0., 0.])), ('HT6W45', ': ', array([10, 0, 0, 26]), ' ', array([ 0.27777778, 0. , 0. , 0.72222222]), ' ', array([ 1., 0., 0., 1.])), ('HT6W47', ': ', array([28, 0, 0, 0]), ' ', array([ 1., 0., 0., 0.]), ' ', array([ 1., 0., 0., 0.])), ('HT6W48', ': ', array([15, 0, 1, 22]), ' ', array([ 0.…	10110111111	0.980131	0.477636	1	1
735	6	62017756	TAAxACT	A	C	[('HT6W37', ': ', array([34, 0, 1, 0]), ' ', array([ 0.97142857, 0. , 0.02857143, 0. ]), ' ', array([ 1., 0., 0., 0.])), ('HT6W45', ': ', array([17, 0, 27, 1]), ' ', array([ 0.37777778, 0. , 0.6 , 0.02222222]), ' ', array([ 1., 0., 1., 0.])), ('HT6W47', ': ', array([37, 0, 0, 0]), ' ', array([ 1., 0., 0., 0.]), ' ', array([ 1., 0., 0., 0.])), ('HT6W48', ': ', array([23, 0, 27, 0]), ' ', array([ 0…	10110111111	0.990476	0.506063	1	1
736	6	65557919	AGTxTAT	T	G	[('HT6W37', ': ', array([ 0, 38, 0, 2]), ' ', array([ 0. , 0.95, 0. , 0.05]), ' ', array([ 0., 1., 0., 0.])), ('HT6W45', ': ', array([ 0, 16, 1, 12]), ' ', array([ 0. , 0.55172414, 0.03448276, 0.4137931 ]), ' ', array([ 0., 1., 0., 1.])), ('HT6W47', ': ', array([ 0, 33, 0, 0]), ' ', array([ 0., 1., 0., 0.]), ' ', array([ 0., 1., 0., 0.])), ('HT6W48', ': ', array([ 0, 18, 0, 23]), ' ', array([ 0. …	10110111111	0.983333	0.489179	1	1
737	6	65675423	ATTxTTC	C	A	[('HT6W37', ': ', array([ 0, 0, 30, 0]), ' ', array([ 0., 0., 1., 0.]), ' ', array([ 0., 0., 1., 0.])), ('HT6W45', ': ', array([25, 0, 22, 0]), ' ', array([ 0.53191489, 0. , 0.46808511, 0. ]), ' ', array([ 1., 0., 1., 0.])), ('HT6W47', ': ', array([ 0, 0, 43, 0]), ' ', array([ 0., 0., 1., 0.]), ' ', array([ 0., 0., 1., 0.])), ('HT6W48', ': ', array([29, 0, 32, 0]), ' ', array([ 0.47540984, 0. , 0…	10110111111	1	0.534276	1	1
738	6	91722997	GTCxTTT	C	A	[('HT6W37', ': ', array([ 0, 0, 34, 0]), ' ', array([ 0., 0., 1., 0.]), ' ', array([ 0., 0., 1., 0.])), ('HT6W45', ': ', array([14, 0, 20, 0]), ' ', array([ 0.41176471, 0. , 0.58823529, 0. ]), ' ', array([ 1., 0., 1., 0.])), ('HT6W47', ': ', array([ 0, 0, 38, 0]), ' ', array([ 0., 0., 1., 0.]), ' ', array([ 0., 0., 1., 0.])), ('HT6W48', ': ', array([24, 0, 21, 0]), ' ', array([ 0.53333333, 0. , 0…	10110111111	1	0.50779	1	1
739	6	92402239	AATxTAT	C	A	[('HT6W37', ': ', array([ 2, 0, 40, 0]), ' ', array([ 0.04761905, 0. , 0.95238095, 0. ]), ' ', array([ 0., 0., 1., 0.])), ('HT6W45', ': ', array([17, 0, 17, 0]), ' ', array([ 0.5, 0. , 0.5, 0. ]), ' ', array([ 1., 0., 1., 0.])), ('HT6W47', ': ', array([ 0, 0, 27, 1]), ' ', array([ 0. , 0. , 0.96428571, 0.03571429]), ' ', array([ 0., 0., 1., 0.])), ('HT6W48', ': ', array([31, 0, 19, 0]), ' ', arra…	10110111111	0.972222	0.528942	1	1
740	6	109706106	CTTxTTA	C	T	[('HT6W37', ': ', array([ 0, 0, 44, 0]), ' ', array([ 0., 0., 1., 0.]), ' ', array([ 0., 0., 1., 0.])), ('HT6W45', ': ', array([ 0, 15, 17, 0]), ' ', array([ 0. , 0.46875, 0.53125, 0. ]), ' ', array([ 0., 1., 1., 0.])), ('HT6W47', ': ', array([ 1, 0, 51, 0]), ' ', array([ 0.01923077, 0. , 0.98076923, 0. ]), ' ', array([ 0., 0., 1., 0.])), ('HT6W48', ': ', array([ 0, 26, 23, 0]), ' ', array([ 0. ,…	10110111111	0.99359	0.517533	1	1
741	6	113459369	TTTxATT	C	A	[('HT6W37', ': ', array([ 2, 0, 35, 0]), ' ', array([ 0.05405405, 0. , 0.94594595, 0. ]), ' ', array([ 0., 0., 1., 0.])), ('HT6W45', ': ', array([12, 0, 22, 0]), ' ', array([ 0.35294118, 0. , 0.64705882, 0. ]), ' ', array([ 1., 0., 1., 0.])), ('HT6W47', ': ', array([ 1, 0, 47, 0]), ' ', array([ 0.02083333, 0. , 0.97916667, 0. ]), ' ', array([ 0., 0., 1., 0.])), ('HT6W48', ': ', array([19, 1, 17, …	10110111111	0.965514	0.509056	1	1
742	6	123110301	ATAxGAG	C	T	[('HT6W37', ': ', array([ 0, 4, 37, 1]), ' ', array([ 0. , 0.0952381 , 0.88095238, 0.02380952]), ' ', array([ 0., 0., 1., 0.])), ('HT6W45', ': ', array([ 0, 15, 15, 1]), ' ', array([ 0. , 0.48387097, 0.48387097, 0.03225806]), ' ', array([ 0., 1., 1., 0.])), ('HT6W47', ': ', array([ 0, 0, 29, 0]), ' ', array([ 0., 0., 1., 0.]), ' ', array([ 0., 0., 1., 0.])), ('HT6W48', ': ', array([ 0, 22, 27, 0]…	10110111111	0.960317	0.472618	1	1
743	6	134397849	TGTxACC	A	G	[('HT6W37', ': ', array([41, 0, 0, 1]), ' ', array([ 0.97619048, 0. , 0. , 0.02380952]), ' ', array([ 1., 0., 0., 0.])), ('HT6W45', ': ', array([17, 0, 0, 20]), ' ', array([ 0.45945946, 0. , 0. , 0.54054054]), ' ', array([ 1., 0., 0., 1.])), ('HT6W47', ': ', array([53, 0, 0, 0]), ' ', array([ 1., 0., 0., 0.]), ' ', array([ 1., 0., 0., 0.])), ('HT6W48', ': ', array([22, 0, 1, 18]), ' ', array([ 0.…	10110111111	0.992063	0.462901	1	1
744	6	163558575	CTCxGAT	C	T	[('HT6W37', ': ', array([ 0, 1, 37, 1]), ' ', array([ 0. , 0.02564103, 0.94871795, 0.02564103]), ' ', array([ 0., 0., 1., 0.])), ('HT6W45', ': ', array([ 0, 14, 15, 0]), ' ', array([ 0. , 0.48275862, 0.51724138, 0. ]), ' ', array([ 0., 1., 1., 0.])), ('HT6W47', ': ', array([ 2, 0, 28, 0]), ' ', array([ 0.06666667, 0. , 0.93333333, 0. ]), ' ', array([ 0., 0., 1., 0.])), ('HT6W48', ': ', array([ 0,…	10110111111	0.960684	0.507573	1	1
745	7	11479874	TCAxAAT	A	G	[('HT6W37', ': ', array([58, 0, 1, 1]), ' ', array([ 0.96666667, 0. , 0.01666667, 0.01666667]), ' ', array([ 1., 0., 0., 0.])), ('HT6W45', ': ', array([53, 2, 0, 11]), ' ', array([ 0.8030303 , 0.03030303, 0. , 0.16666667]), ' ', array([ 1., 0., 0., 0.])), ('HT6W47', ': ', array([86, 0, 0, 0]), ' ', array([ 1., 0., 0., 0.]), ' ', array([ 1., 0., 0., 0.])), ('HT6W48', ': ', array([60, 0, 0, 20]), '…	10110111111	0.988889	0.242689	1	1
746	7	20877939	AAAxAAT	G	T	[('HT6W37', ': ', array([ 0, 0, 0, 54]), ' ', array([ 0., 0., 0., 1.]), ' ', array([ 0., 0., 0., 1.])), ('HT6W45', ': ', array([ 0, 21, 0, 43]), ' ', array([ 0. , 0.328125, 0. , 0.671875]), ' ', array([ 0., 1., 0., 1.])), ('HT6W47', ': ', array([ 0, 0, 0, 74]), ' ', array([ 0., 0., 0., 1.]), ' ', array([ 0., 0., 0., 1.])), ('HT6W48', ': ', array([ 0, 29, 0, 79]), ' ', array([ 0. , 0.26851852, 0. …	10110111111	0.995671	0.238492	1	1
747	7	21031585	GTAxGAT	T	G	[('HT6W37', ': ', array([ 0, 61, 0, 1]), ' ', array([ 0. , 0.98387097, 0. , 0.01612903]), ' ', array([ 0., 1., 0., 0.])), ('HT6W45', ': ', array([ 0, 62, 0, 16]), ' ', array([ 0. , 0.79487179, 0. , 0.20512821]), ' ', array([ 0., 1., 0., 1.])), ('HT6W47', ': ', array([ 0, 86, 0, 0]), ' ', array([ 0., 1., 0., 0.]), ' ', array([ 0., 1., 0., 0.])), ('HT6W48', ': ', array([ 0, 71, 0, 24]), ' ', array(…	10110111111	0.990119	0.235795	1	1
748	7	21574137	ATGxGGC	T	C	[('HT6W37', ': ', array([ 0, 78, 0, 0]), ' ', array([ 0., 1., 0., 0.]), ' ', array([ 0., 1., 0., 0.])), ('HT6W45', ': ', array([ 0, 68, 24, 0]), ' ', array([ 0. , 0.73913043, 0.26086957, 0. ]), ' ', array([ 0., 1., 1., 0.])), ('HT6W47', ': ', array([ 0, 95, 0, 0]), ' ', array([ 0., 1., 0., 0.]), ' ', array([ 0., 1., 0., 0.])), ('HT6W48', ': ', array([ 0, 71, 27, 0]), ' ', array([ 0. , 0.7244898, …	10110111111	0.995169	0.249316	1	1
749	7	44544905	GACxTTT	C	A	[('HT6W37', ': ', array([ 3, 0, 46, 0]), ' ', array([ 0.06122449, 0. , 0.93877551, 0. ]), ' ', array([ 0., 0., 1., 0.])), ('HT6W45', ': ', array([17, 0, 39, 1]), ' ', array([ 0.29824561, 0. , 0.68421053, 0.01754386]), ' ', array([ 1., 0., 1., 0.])), ('HT6W47', ': ', array([ 0, 0, 75, 0]), ' ', array([ 0., 0., 1., 0.]), ' ', array([ 0., 0., 1., 0.])), ('HT6W48', ': ', array([25, 0, 37, 1]), ' ', a…	10110111111	0.979592	0.326835	1	1
750	7	101064949	GAAxTTG	A	C	[('HT6W37', ': ', array([33, 0, 2, 0]), ' ', array([ 0.91666667, 0. , 0.05555556, 0. ]), ' ', array([ 1., 0., 0., 0.])), ('HT6W45', ': ', array([22, 0, 20, 0]), ' ', array([ 0.52380952, 0. , 0.47619048, 0. ]), ' ', array([ 1., 0., 1., 0.])), ('HT6W47', ': ', array([51, 0, 1, 0]), ' ', array([ 0.98076923, 0. , 0.01923077, 0. ]), ' ', array([ 1., 0., 0., 0.])), ('HT6W48', ': ', array([16, 0, 20, 0]…	10110111111	0.974542	0.491455	1	1
751	8	2734977	AAAxATG	A	C	[('HT6W37', ': ', array([27, 0, 0, 0]), ' ', array([ 1., 0., 0., 0.]), ' ', array([ 1., 0., 0., 0.])), ('HT6W45', ': ', array([14, 0, 18, 0]), ' ', array([ 0.4375, 0. , 0.5625, 0. ]), ' ', array([ 1., 0., 1., 0.])), ('HT6W47', ': ', array([56, 0, 0, 0]), ' ', array([ 1., 0., 0., 0.]), ' ', array([ 1., 0., 0., 0.])), ('HT6W48', ': ', array([26, 0, 18, 0]), ' ', array([ 0.59090909, 0. , 0.40909091,…	10110111111	1	0.437928	1	1
752	8	14965416	CATxTTT	A	G	[('HT6W37', ': ', array([38, 0, 0, 1]), ' ', array([ 0.97435897, 0. , 0. , 0.02564103]), ' ', array([ 1., 0., 0., 0.])), ('HT6W45', ': ', array([10, 0, 0, 14]), ' ', array([ 0.41666667, 0. , 0. , 0.58333333]), ' ', array([ 1., 0., 0., 1.])), ('HT6W47', ': ', array([33, 0, 0, 1]), ' ', array([ 0.97058824, 0. , 0. , 0.02941176]), ' ', array([ 1., 0., 0., 0.])), ('HT6W48', ': ', array([18, 0, 0, 25]…	10110111111	0.981649	0.479586	1	1
753	8	15226107	TAAxGTT	G	T	[('HT6W37', ': ', array([ 0, 1, 0, 33]), ' ', array([ 0. , 0.02941176, 0. , 0.97058824]), ' ', array([ 0., 0., 0., 1.])), ('HT6W45', ': ', array([ 0, 16, 0, 27]), ' ', array([ 0. , 0.37209302, 0. , 0.62790698]), ' ', array([ 0., 1., 0., 1.])), ('HT6W47', ': ', array([ 0, 0, 1, 41]), ' ', array([ 0. , 0. , 0.02380952, 0.97619048]), ' ', array([ 0., 0., 0., 1.])), ('HT6W48', ': ', array([ 0, 14, 0,…	10110111111	0.973251	0.501123	1	1
754	8	16696378	GAAxAAC	G	T	[('HT6W37', ': ', array([ 0, 1, 0, 42]), ' ', array([ 0. , 0.02325581, 0. , 0.97674419]), ' ', array([ 0., 0., 0., 1.])), ('HT6W45', ': ', array([ 0, 18, 0, 15]), ' ', array([ 0. , 0.54545455, 0. , 0.45454545]), ' ', array([ 0., 1., 0., 1.])), ('HT6W47', ': ', array([ 0, 1, 1, 46]), ' ', array([ 0. , 0.02083333, 0.02083333, 0.95833333]), ' ', array([ 0., 0., 0., 1.])), ('HT6W48', ': ', array([ 0,…	10110111111	0.96935	0.485741	1	1
755	8	23182980	AAAxATT	A	C	[('HT6W37', ': ', array([38, 0, 2, 1]), ' ', array([ 0.92682927, 0. , 0.04878049, 0.02439024]), ' ', array([ 1., 0., 0., 0.])), ('HT6W45', ': ', array([23, 0, 21, 1]), ' ', array([ 0.51111111, 0. , 0.46666667, 0.02222222]), ' ', array([ 1., 0., 1., 0.])), ('HT6W47', ': ', array([35, 0, 0, 0]), ' ', array([ 1., 0., 0., 0.]), ' ', array([ 1., 0., 0., 0.])), ('HT6W48', ': ', array([21, 0, 17, 0]), '…	10110111111	0.97561	0.482232	1	1
756	8	29540139	CAAxATG	G	T	[('HT6W37', ': ', array([ 0, 5, 0, 42]), ' ', array([ 0. , 0.10638298, 0. , 0.89361702]), ' ', array([ 0., 0., 0., 1.])), ('HT6W45', ': ', array([ 0, 22, 0, 12]), ' ', array([ 0. , 0.64705882, 0. , 0.35294118]), ' ', array([ 0., 1., 0., 1.])), ('HT6W47', ': ', array([ 0, 0, 0, 39]), ' ', array([ 0., 0., 0., 1.]), ' ', array([ 0., 0., 0., 1.])), ('HT6W48', ': ', array([ 0, 28, 0, 29]), ' ', array(…	10110111111	0.964539	0.464495	1	1
757	8	40030889	ATCxAGA	G	A	[('HT6W37', ': ', array([ 2, 0, 0, 42]), ' ', array([ 0.04545455, 0. , 0. , 0.95454545]), ' ', array([ 0., 0., 0., 1.])), ('HT6W45', ': ', array([17, 0, 0, 18]), ' ', array([ 0.48571429, 0. , 0. , 0.51428571]), ' ', array([ 1., 0., 0., 1.])), ('HT6W47', ': ', array([ 0, 0, 0, 30]), ' ', array([ 0., 0., 0., 1.]), ' ', array([ 0., 0., 0., 1.])), ('HT6W48', ': ', array([26, 0, 0, 19]), ' ', array([ …	10110111111	0.984848	0.519324	1	1
758	8	41041641	AGTxGTA	G	T	[('HT6W37', ': ', array([ 0, 1, 0, 34]), ' ', array([ 0. , 0.02857143, 0. , 0.97142857]), ' ', array([ 0., 0., 0., 1.])), ('HT6W45', ': ', array([ 0, 14, 0, 17]), ' ', array([ 0. , 0.4516129, 0. , 0.5483871]), ' ', array([ 0., 1., 0., 1.])), ('HT6W47', ': ', array([ 1, 0, 0, 40]), ' ', array([ 0.02439024, 0. , 0. , 0.97560976]), ' ', array([ 0., 0., 0., 1.])), ('HT6W48', ': ', array([ 0, 25, 0, 2…	10110111111	0.982346	0.490524	1	1
759	8	47700109	AGAxAGA	G	T	[('HT6W37', ': ', array([ 0, 1, 0, 34]), ' ', array([ 0. , 0.02857143, 0. , 0.97142857]), ' ', array([ 0., 0., 0., 1.])), ('HT6W45', ': ', array([ 0, 15, 2, 14]), ' ', array([ 0. , 0.48387097, 0.06451613, 0.4516129 ]), ' ', array([ 0., 1., 0., 1.])), ('HT6W47', ': ', array([ 0, 0, 0, 44]), ' ', array([ 0., 0., 0., 1.]), ' ', array([ 0., 0., 0., 1.])), ('HT6W48', ': ', array([ 0, 15, 0, 13]), ' ',…	10110111111	0.990476	0.471194	1	1
760	8	54852230	GGAxTCG	G	T	[('HT6W37', ': ', array([ 0, 0, 0, 31]), ' ', array([ 0., 0., 0., 1.]), ' ', array([ 0., 0., 0., 1.])), ('HT6W45', ': ', array([ 0, 15, 0, 20]), ' ', array([ 0. , 0.42857143, 0. , 0.57142857]), ' ', array([ 0., 1., 0., 1.])), ('HT6W47', ': ', array([ 0, 0, 0, 43]), ' ', array([ 0., 0., 0., 1.]), ' ', array([ 0., 0., 0., 1.])), ('HT6W48', ': ', array([ 0, 26, 0, 18]), ' ', array([ 0. , 0.59090909,…	10110111111	1	0.522271	1	1
761	8	66966655	TAAxTCT	A	C	[('HT6W37', ': ', array([33, 0, 0, 0]), ' ', array([ 1., 0., 0., 0.]), ' ', array([ 1., 0., 0., 0.])), ('HT6W45', ': ', array([17, 0, 23, 0]), ' ', array([ 0.425, 0. , 0.575, 0. ]), ' ', array([ 1., 0., 1., 0.])), ('HT6W47', ': ', array([46, 0, 0, 0]), ' ', array([ 1., 0., 0., 0.]), ' ', array([ 1., 0., 0., 0.])), ('HT6W48', ': ', array([22, 0, 27, 0]), ' ', array([ 0.44897959, 0. , 0.55102041, 0…	10110111111	1	0.472737	1	1
762	8	71906220	ATAxATT	A	C	[('HT6W37', ': ', array([ 0, 45, 1, 0]), ' ', array([ 0. , 0.97826087, 0.02173913, 0. ]), ' ', array([ 0., 1., 0., 0.])), ('HT6W45', ': ', array([ 0, 13, 20, 1]), ' ', array([ 0. , 0.38235294, 0.58823529, 0.02941176]), ' ', array([ 0., 1., 1., 0.])), ('HT6W47', ': ', array([18, 20, 0, 1]), ' ', array([ 0.46153846, 0.51282051, 0. , 0.02564103]), ' ', array([ 1., 1., 0., 0.])), ('HT6W48', ': ', arr…	10110111111	0.29799	0.502154	0.999991	1
763	8	83949977	CCGxCTG	T	C	[('HT6W37', ': ', array([ 0, 29, 2, 0]), ' ', array([ 0. , 0.93548387, 0.06451613, 0. ]), ' ', array([ 0., 1., 0., 0.])), ('HT6W45', ': ', array([ 0, 19, 16, 0]), ' ', array([ 0. , 0.54285714, 0.45714286, 0. ]), ' ', array([ 0., 1., 1., 0.])), ('HT6W47', ': ', array([ 0, 50, 0, 0]), ' ', array([ 0., 1., 0., 0.]), ' ', array([ 0., 1., 0., 0.])), ('HT6W48', ': ', array([ 0, 19, 16, 0]), ' ', array(…	10110111111	0.978495	0.482937	1	1
764	8	85167343	ACAxAAT	A	C	[('HT6W37', ': ', array([44, 0, 3, 0]), ' ', array([ 0.93617021, 0. , 0.06382979, 0. ]), ' ', array([ 1., 0., 0., 0.])), ('HT6W45', ': ', array([ 8, 0, 19, 0]), ' ', array([ 0.2962963, 0. , 0.7037037, 0. ]), ' ', array([ 1., 0., 1., 0.])), ('HT6W47', ': ', array([42, 0, 0, 0]), ' ', array([ 1., 0., 0., 0.]), ' ', array([ 1., 0., 0., 0.])), ('HT6W48', ': ', array([26, 0, 29, 1]), ' ', array([ 0.46…	10110111111	0.978723	0.504656	1	1
765	8	93328175	CAAxTGA	G	T	[('HT6W37', ': ', array([ 0, 2, 0, 38]), ' ', array([ 0. , 0.05, 0. , 0.95]), ' ', array([ 0., 0., 0., 1.])), ('HT6W45', ': ', array([ 0, 19, 0, 18]), ' ', array([ 0. , 0.51351351, 0. , 0.48648649]), ' ', array([ 0., 1., 0., 1.])), ('HT6W47', ': ', array([ 0, 0, 0, 37]), ' ', array([ 0., 0., 0., 1.]), ' ', array([ 0., 0., 0., 1.])), ('HT6W48', ': ', array([ 0, 13, 0, 26]), ' ', array([ 0. , 0.333…	10110111111	0.983333	0.4893	1	1
766	8	99887877	GAAxAGA	G	T	[('HT6W37', ': ', array([ 0, 1, 0, 53]), ' ', array([ 0. , 0.01851852, 0. , 0.98148148]), ' ', array([ 0., 0., 0., 1.])), ('HT6W45', ': ', array([ 0, 21, 0, 20]), ' ', array([ 0. , 0.51219512, 0. , 0.48780488]), ' ', array([ 0., 1., 0., 1.])), ('HT6W47', ': ', array([ 0, 0, 0, 36]), ' ', array([ 0., 0., 0., 1.]), ' ', array([ 0., 0., 0., 1.])), ('HT6W48', ': ', array([ 0, 16, 0, 23]), ' ', array(…	10110111111	0.993827	0.469721	1	1
767	8	139011834	TAAxAGT	G	A	[('HT6W37', ': ', array([ 0, 0, 0, 42]), ' ', array([ 0., 0., 0., 1.]), ' ', array([ 0., 0., 0., 1.])), ('HT6W45', ': ', array([23, 0, 0, 17]), ' ', array([ 0.575, 0. , 0. , 0.425]), ' ', array([ 1., 0., 0., 1.])), ('HT6W47', ': ', array([ 0, 0, 0, 37]), ' ', array([ 0., 0., 0., 1.]), ' ', array([ 0., 0., 0., 1.])), ('HT6W48', ': ', array([13, 0, 0, 23]), ' ', array([ 0.36111111, 0. , 0. , 0.6388…	10110111111	1	0.47786	1	1
768	9	6651597	GGTxTTG	C	A	[('HT6W37', ': ', array([ 1, 0, 27, 0]), ' ', array([ 0.03571429, 0. , 0.96428571, 0. ]), ' ', array([ 0., 0., 1., 0.])), ('HT6W45', ': ', array([14, 0, 16, 0]), ' ', array([ 0.46666667, 0. , 0.53333333, 0. ]), ' ', array([ 1., 0., 1., 0.])), ('HT6W47', ': ', array([ 0, 0, 34, 0]), ' ', array([ 0., 0., 1., 0.]), ' ', array([ 0., 0., 1., 0.])), ('HT6W48', ': ', array([17, 0, 12, 1]), ' ', array([ …	10110111111	0.974206	0.465597	1	1
769	9	20676961	GGAxGTA	G	T	[('HT6W37', ': ', array([ 0, 1, 0, 41]), ' ', array([ 0. , 0.02380952, 0. , 0.97619048]), ' ', array([ 0., 0., 0., 1.])), ('HT6W45', ': ', array([ 1, 15, 0, 20]), ' ', array([ 0.02777778, 0.41666667, 0. , 0.55555556]), ' ', array([ 0., 1., 0., 1.])), ('HT6W47', ': ', array([ 1, 0, 0, 44]), ' ', array([ 0.02222222, 0. , 0. , 0.97777778]), ' ', array([ 0., 0., 0., 1.])), ('HT6W48', ': ', array([ 1,…	10110111111	0.975884	0.516517	1	1
770	9	20959567	TATxTTC	T	G	[('HT6W37', ': ', array([ 0, 46, 0, 1]), ' ', array([ 0. , 0.9787234, 0. , 0.0212766]), ' ', array([ 0., 1., 0., 0.])), ('HT6W45', ': ', array([ 0, 23, 0, 18]), ' ', array([ 0. , 0.56097561, 0. , 0.43902439]), ' ', array([ 0., 1., 0., 1.])), ('HT6W47', ': ', array([ 0, 47, 0, 0]), ' ', array([ 0., 1., 0., 0.]), ' ', array([ 0., 1., 0., 0.])), ('HT6W48', ': ', array([ 0, 24, 0, 17]), ' ', array([ …	10110111111	0.992908	0.460923	1	1
771	9	24165515	CCAxGAT	G	T	[('HT6W37', ': ', array([ 0, 1, 0, 28]), ' ', array([ 0. , 0.03448276, 0. , 0.96551724]), ' ', array([ 0., 0., 0., 1.])), ('HT6W45', ': ', array([ 0, 18, 0, 15]), ' ', array([ 0. , 0.54545455, 0. , 0.45454545]), ' ', array([ 0., 1., 0., 1.])), ('HT6W47', ': ', array([ 0, 1, 0, 33]), ' ', array([ 0. , 0.02941176, 0. , 0.97058824]), ' ', array([ 0., 0., 0., 1.])), ('HT6W48', ': ', array([ 0, 20, 0,…	10110111111	0.978702	0.450879	1	1
772	9	29816328	TCTxGTG	T	A	[('HT6W37', ': ', array([ 1, 30, 0, 0]), ' ', array([ 0.03225806, 0.96774194, 0. , 0. ]), ' ', array([ 0., 1., 0., 0.])), ('HT6W45', ': ', array([19, 19, 1, 0]), ' ', array([ 0.48717949, 0.48717949, 0.02564103, 0. ]), ' ', array([ 1., 1., 0., 0.])), ('HT6W47', ': ', array([ 1, 43, 1, 1]), ' ', array([ 0.02173913, 0.93478261, 0.02173913, 0.02173913]), ' ', array([ 0., 1., 0., 0.])), ('HT6W48', ': …	10110111111	0.967508	0.439022	1	1
773	9	77762359	TTTxTAT	T	C	[('HT6W37', ': ', array([ 0, 50, 1, 0]), ' ', array([ 0. , 0.98039216, 0.01960784, 0. ]), ' ', array([ 0., 1., 0., 0.])), ('HT6W45', ': ', array([ 0, 22, 19, 0]), ' ', array([ 0. , 0.53658537, 0.46341463, 0. ]), ' ', array([ 0., 1., 1., 0.])), ('HT6W47', ': ', array([ 0, 44, 1, 0]), ' ', array([ 0. , 0.97777778, 0.02222222, 0. ]), ' ', array([ 0., 1., 0., 0.])), ('HT6W48', ': ', array([ 0, 19, 13…	10110111111	0.986057	0.537085	1	1
774	9	80154572	GGAxACA	G	A	[('HT6W37', ': ', array([ 3, 0, 0, 34]), ' ', array([ 0.08108108, 0. , 0. , 0.91891892]), ' ', array([ 0., 0., 0., 1.])), ('HT6W45', ': ', array([16, 0, 1, 19]), ' ', array([ 0.44444444, 0. , 0.02777778, 0.52777778]), ' ', array([ 1., 0., 0., 1.])), ('HT6W47', ': ', array([ 0, 0, 0, 34]), ' ', array([ 0., 0., 0., 1.]), ' ', array([ 0., 0., 0., 1.])), ('HT6W48', ': ', array([18, 0, 0, 22]), ' ', a…	10110111111	0.961068	0.469667	1	1
775	9	94300974	AAAxCAA	C	T	[('HT6W37', ': ', array([ 0, 0, 38, 0]), ' ', array([ 0., 0., 1., 0.]), ' ', array([ 0., 0., 1., 0.])), ('HT6W45', ': ', array([ 0, 18, 14, 0]), ' ', array([ 0. , 0.5625, 0.4375, 0. ]), ' ', array([ 0., 1., 1., 0.])), ('HT6W47', ': ', array([ 1, 0, 38, 0]), ' ', array([ 0.02564103, 0. , 0.97435897, 0. ]), ' ', array([ 0., 0., 1., 0.])), ('HT6W48', ': ', array([ 1, 24, 19, 1]), ' ', array([ 0.0222…	10110111111	0.991453	0.504006	1	1
776	9	95344152	TGCxTGA	T	C	[('HT6W37', ': ', array([ 0, 28, 0, 0]), ' ', array([ 0., 1., 0., 0.]), ' ', array([ 0., 1., 0., 0.])), ('HT6W45', ': ', array([ 0, 15, 17, 0]), ' ', array([ 0. , 0.46875, 0.53125, 0. ]), ' ', array([ 0., 1., 1., 0.])), ('HT6W47', ': ', array([ 0, 37, 0, 2]), ' ', array([ 0. , 0.94871795, 0. , 0.05128205]), ' ', array([ 0., 1., 0., 0.])), ('HT6W48', ': ', array([ 0, 19, 15, 0]), ' ', array([ 0. ,…	10110111111	0.982906	0.493143	1	1
777	9	112959665	GGAxACT	G	T	[('HT6W37', ': ', array([ 0, 1, 0, 40]), ' ', array([ 0. , 0.02439024, 0. , 0.97560976]), ' ', array([ 0., 0., 0., 1.])), ('HT6W45', ': ', array([ 0, 15, 1, 16]), ' ', array([ 0. , 0.46875, 0.03125, 0.5 ]), ' ', array([ 0., 1., 0., 1.])), ('HT6W47', ': ', array([ 0, 0, 1, 38]), ' ', array([ 0. , 0. , 0.02564103, 0.97435897]), ' ', array([ 0., 0., 0., 1.])), ('HT6W48', ': ', array([ 0, 20, 0, 26])…	10110111111	0.983323	0.500432	1	1
778	9	122188041	AAAxGGT	G	T	[('HT6W37', ': ', array([ 0, 0, 0, 36]), ' ', array([ 0., 0., 0., 1.]), ' ', array([ 0., 0., 0., 1.])), ('HT6W45', ': ', array([ 0, 13, 0, 19]), ' ', array([ 0. , 0.40625, 0. , 0.59375]), ' ', array([ 0., 1., 0., 1.])), ('HT6W47', ': ', array([ 0, 0, 0, 61]), ' ', array([ 0., 0., 0., 1.]), ' ', array([ 0., 0., 0., 1.])), ('HT6W48', ': ', array([ 0, 22, 0, 17]), ' ', array([ 0. , 0.56410256, 0. , …	10110111111	1	0.497124	1	1
779	9	122219579	AATxTAT	T	G	[('HT6W37', ': ', array([ 0, 37, 0, 0]), ' ', array([ 0., 1., 0., 0.]), ' ', array([ 0., 1., 0., 0.])), ('HT6W45', ': ', array([ 0, 14, 0, 20]), ' ', array([ 0. , 0.41176471, 0. , 0.58823529]), ' ', array([ 0., 1., 0., 1.])), ('HT6W47', ': ', array([ 0, 64, 0, 0]), ' ', array([ 0., 1., 0., 0.]), ' ', array([ 0., 1., 0., 0.])), ('HT6W48', ': ', array([ 0, 27, 0, 19]), ' ', array([ 0. , 0.58695652,…	10110111111	1	0.465382	1	1
780	10	4254290	ACTxAAT	G	T	[('HT6W37', ': ', array([ 0, 2, 1, 45]), ' ', array([ 0. , 0.04166667, 0.02083333, 0.9375 ]), ' ', array([ 0., 0., 0., 1.])), ('HT6W45', ': ', array([ 0, 21, 0, 19]), ' ', array([ 0. , 0.525, 0. , 0.475]), ' ', array([ 0., 1., 0., 1.])), ('HT6W47', ': ', array([ 0, 1, 0, 39]), ' ', array([ 0. , 0.025, 0. , 0.975]), ' ', array([ 0., 0., 0., 1.])), ('HT6W48', ': ', array([ 0, 22, 0, 21]), ' ', arra…	10110111111	0.951225	0.516096	1	1
781	10	7956237	AACxATG	G	A	[('HT6W37', ': ', array([ 2, 0, 0, 36]), ' ', array([ 0.05263158, 0. , 0. , 0.94736842]), ' ', array([ 0., 0., 0., 1.])), ('HT6W45', ': ', array([ 9, 0, 0, 21]), ' ', array([ 0.3, 0. , 0. , 0.7]), ' ', array([ 1., 0., 0., 1.])), ('HT6W47', ': ', array([ 0, 0, 0, 38]), ' ', array([ 0., 0., 0., 1.]), ' ', array([ 0., 0., 0., 1.])), ('HT6W48', ': ', array([23, 0, 0, 23]), ' ', array([ 0.5, 0. , 0. ,…	10110111111	0.982456	0.460173	1	1
782	10	56196517	AAAxTCT	G	T	[('HT6W37', ': ', array([ 0, 2, 0, 27]), ' ', array([ 0. , 0.06896552, 0. , 0.93103448]), ' ', array([ 0., 0., 0., 1.])), ('HT6W45', ': ', array([ 0, 19, 0, 25]), ' ', array([ 0. , 0.43181818, 0. , 0.56818182]), ' ', array([ 0., 1., 0., 1.])), ('HT6W47', ': ', array([ 1, 0, 0, 47]), ' ', array([ 0.02083333, 0. , 0. , 0.97916667]), ' ', array([ 0., 0., 0., 1.])), ('HT6W48', ': ', array([ 0, 21, 0,…	10110111111	0.970067	0.494038	1	1
783	10	108223373	CAAxATT	A	C	[('HT6W37', ': ', array([37, 0, 2, 0]), ' ', array([ 0.94871795, 0. , 0.05128205, 0. ]), ' ', array([ 1., 0., 0., 0.])), ('HT6W45', ': ', array([11, 0, 13, 0]), ' ', array([ 0.45833333, 0. , 0.54166667, 0. ]), ' ', array([ 1., 0., 1., 0.])), ('HT6W47', ': ', array([41, 0, 0, 0]), ' ', array([ 1., 0., 0., 0.]), ' ', array([ 1., 0., 0., 0.])), ('HT6W48', ': ', array([22, 0, 23, 0]), ' ', array([ 0.…	10110111111	0.97056	0.497092	1	1
784	10	110778370	AAAxGGT	G	T	[('HT6W37', ': ', array([ 0, 0, 0, 29]), ' ', array([ 0., 0., 0., 1.]), ' ', array([ 0., 0., 0., 1.])), ('HT6W45', ': ', array([ 0, 24, 0, 25]), ' ', array([ 0. , 0.48979592, 0. , 0.51020408]), ' ', array([ 0., 1., 0., 1.])), ('HT6W47', ': ', array([ 0, 0, 0, 35]), ' ', array([ 0., 0., 0., 1.]), ' ', array([ 0., 0., 0., 1.])), ('HT6W48', ': ', array([ 0, 27, 0, 21]), ' ', array([ 0. , 0.5625, 0. …	10110111111	1	0.507066	1	1
785	10	131384691	GATxCAC	G	A	[('HT6W37', ': ', array([ 1, 1, 1, 31]), ' ', array([ 0.02941176, 0.02941176, 0.02941176, 0.91176471]), ' ', array([ 0., 0., 0., 1.])), ('HT6W45', ': ', array([20, 0, 0, 13]), ' ', array([ 0.60606061, 0. , 0. , 0.39393939]), ' ', array([ 1., 0., 0., 1.])), ('HT6W47', ': ', array([ 0, 1, 0, 45]), ' ', array([ 0. , 0.02173913, 0. , 0.97826087]), ' ', array([ 0., 0., 0., 1.])), ('HT6W48', ': ', arra…	10110111111	0.963342	0.468925	1	1
786	11	91940791	GTGxCAG	A	G	[('HT6W37', ': ', array([38, 0, 0, 1]), ' ', array([ 0.97435897, 0. , 0. , 0.02564103]), ' ', array([ 1., 0., 0., 0.])), ('HT6W45', ': ', array([19, 0, 0, 22]), ' ', array([ 0.46341463, 0. , 0. , 0.53658537]), ' ', array([ 1., 0., 0., 1.])), ('HT6W47', ': ', array([46, 0, 0, 0]), ' ', array([ 1., 0., 0., 0.]), ' ', array([ 1., 0., 0., 0.])), ('HT6W48', ': ', array([29, 0, 0, 26]), ' ', array([ 0.…	10110111111	0.9807	0.46731	1	1
787	11	106383696	GGAxAAT	A	G	[('HT6W37', ': ', array([39, 0, 0, 2]), ' ', array([ 0.95121951, 0. , 0. , 0.04878049]), ' ', array([ 1., 0., 0., 0.])), ('HT6W45', ': ', array([17, 0, 0, 23]), ' ', array([ 0.425, 0. , 0. , 0.575]), ' ', array([ 1., 0., 0., 1.])), ('HT6W47', ': ', array([37, 0, 0, 0]), ' ', array([ 1., 0., 0., 0.]), ' ', array([ 1., 0., 0., 0.])), ('HT6W48', ': ', array([32, 0, 0, 29]), ' ', array([ 0.52459016, …	10110111111	0.98374	0.54754	1	1
788	12	19311504	AGGxACA	A	G	[('HT6W37', ': ', array([55, 0, 0, 0]), ' ', array([ 1., 0., 0., 0.]), ' ', array([ 1., 0., 0., 0.])), ('HT6W45', ': ', array([46, 1, 0, 12]), ' ', array([ 0.77966102, 0.01694915, 0. , 0.20338983]), ' ', array([ 1., 0., 0., 1.])), ('HT6W47', ': ', array([72, 0, 0, 0]), ' ', array([ 1., 0., 0., 0.]), ' ', array([ 1., 0., 0., 0.])), ('HT6W48', ': ', array([41, 0, 0, 23]), ' ', array([ 0.640625, 0. …	10110111111	0.994152	0.310675	1	1
789	12	38923341	ATCxTTT	C	A	[('HT6W37', ': ', array([ 1, 0, 52, 0]), ' ', array([ 0.01886792, 0. , 0.98113208, 0. ]), ' ', array([ 0., 0., 1., 0.])), ('HT6W45', ': ', array([15, 0, 36, 0]), ' ', array([ 0.29411765, 0. , 0.70588235, 0. ]), ' ', array([ 1., 0., 1., 0.])), ('HT6W47', ': ', array([ 0, 0, 59, 0]), ' ', array([ 0., 0., 1., 0.]), ' ', array([ 0., 0., 1., 0.])), ('HT6W48', ': ', array([22, 1, 46, 0]), ' ', array([ …	10110111111	0.993711	0.360827	1	1
790	12	47032964	GTTxTTA	C	A	[('HT6W37', ': ', array([ 1, 0, 52, 1]), ' ', array([ 0.01851852, 0. , 0.96296296, 0.01851852]), ' ', array([ 0., 0., 1., 0.])), ('HT6W45', ': ', array([29, 0, 30, 0]), ' ', array([ 0.49152542, 0. , 0.50847458, 0. ]), ' ', array([ 1., 0., 1., 0.])), ('HT6W47', ': ', array([ 0, 0, 64, 0]), ' ', array([ 0., 0., 1., 0.]), ' ', array([ 0., 0., 1., 0.])), ('HT6W48', ': ', array([17, 0, 35, 0]), ' ', a…	10110111111	0.982099	0.326317	1	1
791	12	95743152	ACAxCAA	A	G	[('HT6W37', ': ', array([54, 0, 0, 0]), ' ', array([ 1., 0., 0., 0.]), ' ', array([ 1., 0., 0., 0.])), ('HT6W45', ': ', array([32, 0, 2, 11]), ' ', array([ 0.71111111, 0. , 0.04444444, 0.24444444]), ' ', array([ 1., 0., 0., 1.])), ('HT6W47', ': ', array([79, 0, 0, 1]), ' ', array([ 0.9875, 0. , 0. , 0.0125]), ' ', array([ 1., 0., 0., 0.])), ('HT6W48', ': ', array([37, 0, 0, 27]), ' ', array([ 0.5…	10110111111	0.989544	0.359247	1	1
792	12	111829025	TGGxGCG	C	T	[('HT6W37', ': ', array([ 0, 0, 69, 2]), ' ', array([ 0. , 0. , 0.97183099, 0.02816901]), ' ', array([ 0., 0., 1., 0.])), ('HT6W45', ': ', array([ 0, 16, 39, 0]), ' ', array([ 0. , 0.29090909, 0.70909091, 0. ]), ' ', array([ 0., 1., 1., 0.])), ('HT6W47', ': ', array([ 0, 0, 61, 0]), ' ', array([ 0., 0., 1., 0.]), ' ', array([ 0., 0., 1., 0.])), ('HT6W48', ': ', array([ 0, 21, 27, 1]), ' ', array(…	10110111111	0.98455	0.352277	1	1
793	13	51574344	CGGxGCT	A	G	[('HT6W37', ': ', array([48, 0, 0, 1]), ' ', array([ 0.97959184, 0. , 0. , 0.02040816]), ' ', array([ 1., 0., 0., 0.])), ('HT6W45', ': ', array([11, 0, 0, 22]), ' ', array([ 0.33333333, 0. , 0. , 0.66666667]), ' ', array([ 1., 0., 0., 1.])), ('HT6W47', ': ', array([33, 0, 0, 0]), ' ', array([ 1., 0., 0., 0.]), ' ', array([ 1., 0., 0., 0.])), ('HT6W48', ': ', array([18, 0, 0, 19]), ' ', array([ 0.…	10110111111	0.993197	0.548234	1	1
794	13	54770393	ATGxAAT	G	C	[('HT6W37', ': ', array([ 0, 0, 0, 40]), ' ', array([ 0., 0., 0., 1.]), ' ', array([ 0., 0., 0., 1.])), ('HT6W45', ': ', array([ 0, 0, 22, 18]), ' ', array([ 0. , 0. , 0.55, 0.45]), ' ', array([ 0., 0., 1., 1.])), ('HT6W47', ': ', array([ 0, 0, 0, 45]), ' ', array([ 0., 0., 0., 1.]), ' ', array([ 0., 0., 0., 1.])), ('HT6W48', ': ', array([ 0, 0, 24, 24]), ' ', array([ 0. , 0. , 0.5, 0.5]), ' ', a…	10110111111	1	0.513079	1	1
795	13	76630050	AAAxGAT	A	G	[('HT6W37', ': ', array([18, 0, 0, 0]), ' ', array([ 1., 0., 0., 0.]), ' ', array([ 1., 0., 0., 0.])), ('HT6W45', ': ', array([ 0, 0, 0, 22]), ' ', array([ 0., 0., 0., 1.]), ' ', array([ 0., 0., 0., 1.])), ('HT6W47', ': ', array([30, 0, 0, 0]), ' ', array([ 1., 0., 0., 0.]), ' ', array([ 1., 0., 0., 0.])), ('HT6W48', ': ', array([ 0, 0, 0, 22]), ' ', array([ 0., 0., 0., 1.]), ' ', array([ 0., 0.,…	10110111111	1	0.98304	1	1
796	14	41821383	GAAxATA	G	T	[('HT6W37', ': ', array([ 0, 3, 0, 34]), ' ', array([ 0. , 0.08108108, 0. , 0.91891892]), ' ', array([ 0., 0., 0., 1.])), ('HT6W45', ': ', array([ 0, 15, 0, 16]), ' ', array([ 0. , 0.48387097, 0. , 0.51612903]), ' ', array([ 0., 1., 0., 1.])), ('HT6W47', ': ', array([ 0, 0, 0, 33]), ' ', array([ 0., 0., 0., 1.]), ' ', array([ 0., 0., 0., 1.])), ('HT6W48', ': ', array([ 0, 34, 0, 21]), ' ', array(…	10110111111	0.961479	0.513693	1	1
797	14	87138823	ACAxAGT	C	T	[('HT6W37', ': ', array([ 0, 4, 39, 0]), ' ', array([ 0. , 0.09302326, 0.90697674, 0. ]), ' ', array([ 0., 0., 1., 0.])), ('HT6W45', ': ', array([ 0, 24, 27, 0]), ' ', array([ 0. , 0.47058824, 0.52941176, 0. ]), ' ', array([ 0., 1., 1., 0.])), ('HT6W47', ': ', array([ 0, 0, 40, 0]), ' ', array([ 0., 0., 1., 0.]), ' ', array([ 0., 0., 1., 0.])), ('HT6W48', ': ', array([ 0, 23, 37, 0]), ' ', array(…	10110111111	0.968992	0.474976	1	1
798	14	87843932	ATAxGGA	A	C	[('HT6W37', ': ', array([38, 0, 2, 0]), ' ', array([ 0.95, 0. , 0.05, 0. ]), ' ', array([ 1., 0., 0., 0.])), ('HT6W45', ': ', array([11, 0, 12, 0]), ' ', array([ 0.47826087, 0. , 0.52173913, 0. ]), ' ', array([ 1., 0., 1., 0.])), ('HT6W47', ': ', array([39, 0, 0, 1]), ' ', array([ 0.975, 0. , 0. , 0.025]), ' ', array([ 1., 0., 0., 0.])), ('HT6W48', ': ', array([26, 0, 24, 0]), ' ', array([ 0.52, …	10110111111	0.975	0.513065	1	1
799	14	89654569	ACCxTGG	G	A	[('HT6W37', ': ', array([ 1, 0, 0, 34]), ' ', array([ 0.02857143, 0. , 0. , 0.97142857]), ' ', array([ 0., 0., 0., 1.])), ('HT6W45', ': ', array([29, 0, 0, 17]), ' ', array([ 0.63043478, 0. , 0. , 0.36956522]), ' ', array([ 1., 0., 0., 1.])), ('HT6W47', ': ', array([ 0, 0, 0, 38]), ' ', array([ 0., 0., 0., 1.]), ' ', array([ 0., 0., 0., 1.])), ('HT6W48', ': ', array([13, 0, 0, 19]), ' ', array([ …	10110111111	0.990476	0.491866	1	1
800	15	20156773	ACCxCCG	A	G	[('HT6W37', ': ', array([28, 0, 0, 1]), ' ', array([ 0.96551724, 0. , 0. , 0.03448276]), ' ', array([ 1., 0., 0., 0.])), ('HT6W45', ': ', array([19, 0, 0, 18]), ' ', array([ 0.51351351, 0. , 0. , 0.48648649]), ' ', array([ 1., 0., 0., 1.])), ('HT6W47', ': ', array([43, 0, 0, 0]), ' ', array([ 1., 0., 0., 0.]), ' ', array([ 1., 0., 0., 0.])), ('HT6W48', ': ', array([14, 0, 0, 16]), ' ', array([ 0.…	10110111111	0.988506	0.537258	1	1
801	15	20807449	TTGxCTG	G	A	[('HT6W37', ': ', array([ 1, 0, 0, 42]), ' ', array([ 0.02325581, 0. , 0. , 0.97674419]), ' ', array([ 0., 0., 0., 1.])), ('HT6W45', ': ', array([17, 0, 0, 26]), ' ', array([ 0.39534884, 0. , 0. , 0.60465116]), ' ', array([ 1., 0., 0., 1.])), ('HT6W47', ': ', array([ 0, 0, 0, 41]), ' ', array([ 0., 0., 0., 1.]), ' ', array([ 0., 0., 0., 1.])), ('HT6W48', ': ', array([19, 0, 0, 30]), ' ', array([ …	10110111111	0.992248	0.41766	1	1
802	15	21027759	GGAxACA	G	T	[('HT6W37', ': ', array([ 0, 0, 0, 49]), ' ', array([ 0., 0., 0., 1.]), ' ', array([ 0., 0., 0., 1.])), ('HT6W45', ': ', array([ 0, 12, 0, 51]), ' ', array([ 0. , 0.19047619, 0. , 0.80952381]), ' ', array([ 0., 0., 0., 1.])), ('HT6W47', ': ', array([ 1, 0, 0, 63]), ' ', array([ 0.015625, 0. , 0. , 0.984375]), ' ', array([ 0., 0., 0., 1.])), ('HT6W48', ': ', array([ 1, 19, 0, 24]), ' ', array([ 0.…	10110111111	0.994792	0.314	1	1
803	15	21934402	CCCxTTG	T	C	[('HT6W37', ': ', array([ 0, 77, 2, 1]), ' ', array([ 0. , 0.9625, 0.025 , 0.0125]), ' ', array([ 0., 1., 0., 0.])), ('HT6W45', ': ', array([ 0, 58, 20, 0]), ' ', array([ 0. , 0.74358974, 0.25641026, 0. ]), ' ', array([ 0., 1., 1., 0.])), ('HT6W47', ': ', array([ 0, 71, 1, 0]), ' ', array([ 0. , 0.98611111, 0.01388889, 0. ]), ' ', array([ 0., 1., 0., 0.])), ('HT6W48', ': ', array([ 1, 65, 10, 0])…	10110111111	0.98287	0.224549	0.999998	1
804	15	61453972	CAAxTCT	A	C	[('HT6W37', ': ', array([37, 0, 3, 0]), ' ', array([ 0.925, 0. , 0.075, 0. ]), ' ', array([ 1., 0., 0., 0.])), ('HT6W45', ': ', array([20, 0, 16, 0]), ' ', array([ 0.55555556, 0. , 0.44444444, 0. ]), ' ', array([ 1., 0., 1., 0.])), ('HT6W47', ': ', array([44, 0, 0, 0]), ' ', array([ 1., 0., 0., 0.]), ' ', array([ 1., 0., 0., 0.])), ('HT6W48', ': ', array([23, 0, 20, 0]), ' ', array([ 0.53488372, …	10110111111	0.975	0.48561	1	1
805	15	65014626	AATxGCT	C	T	[('HT6W37', ': ', array([ 0, 1, 27, 0]), ' ', array([ 0. , 0.03571429, 0.96428571, 0. ]), ' ', array([ 0., 0., 1., 0.])), ('HT6W45', ': ', array([ 0, 22, 22, 0]), ' ', array([ 0. , 0.5, 0.5, 0. ]), ' ', array([ 0., 1., 1., 0.])), ('HT6W47', ': ', array([ 0, 0, 22, 0]), ' ', array([ 0., 0., 1., 0.]), ' ', array([ 0., 0., 1., 0.])), ('HT6W48', ': ', array([ 0, 19, 16, 0]), ' ', array([ 0. , 0.54285…	10110111111	0.979086	0.467426	1	1
806	15	66479565	AAGxGAT	A	T	[('HT6W37', ': ', array([56, 2, 0, 0]), ' ', array([ 0.96551724, 0.03448276, 0. , 0. ]), ' ', array([ 1., 0., 0., 0.])), ('HT6W45', ': ', array([22, 20, 0, 0]), ' ', array([ 0.52380952, 0.47619048, 0. , 0. ]), ' ', array([ 1., 1., 0., 0.])), ('HT6W47', ': ', array([40, 0, 2, 0]), ' ', array([ 0.95238095, 0. , 0.04761905, 0. ]), ' ', array([ 1., 0., 0., 0.])), ('HT6W48', ': ', array([30, 34, 0, 0]…	10110111111	0.972633	0.536147	1	1
807	15	70907065	AATxTCT	C	A	[('HT6W37', ': ', array([ 0, 0, 34, 0]), ' ', array([ 0., 0., 1., 0.]), ' ', array([ 0., 0., 1., 0.])), ('HT6W45', ': ', array([12, 0, 23, 0]), ' ', array([ 0.34285714, 0. , 0.65714286, 0. ]), ' ', array([ 1., 0., 1., 0.])), ('HT6W47', ': ', array([ 0, 0, 48, 0]), ' ', array([ 0., 0., 1., 0.]), ' ', array([ 0., 0., 1., 0.])), ('HT6W48', ': ', array([19, 0, 33, 0]), ' ', array([ 0.36538462, 0. , 0…	10110111111	1	0.426609	1	1
808	15	76339739	AAAxAAA	G	T	[('HT6W37', ': ', array([ 0, 0, 0, 45]), ' ', array([ 0., 0., 0., 1.]), ' ', array([ 0., 0., 0., 1.])), ('HT6W45', ': ', array([ 0, 15, 0, 13]), ' ', array([ 0. , 0.53571429, 0. , 0.46428571]), ' ', array([ 0., 1., 0., 1.])), ('HT6W47', ': ', array([ 0, 0, 0, 35]), ' ', array([ 0., 0., 0., 1.]), ' ', array([ 0., 0., 0., 1.])), ('HT6W48', ': ', array([ 0, 16, 0, 22]), ' ', array([ 0. , 0.42105263,…	10110111111	0.985507	0.467317	1	1
809	15	87979281	TGAxATG	A	T	[('HT6W37', ': ', array([19, 4, 0, 0]), ' ', array([ 0.82608696, 0.17391304, 0. , 0. ]), ' ', array([ 1., 0., 0., 0.])), ('HT6W45', ': ', array([13, 22, 0, 0]), ' ', array([ 0.37142857, 0.62857143, 0. , 0. ]), ' ', array([ 1., 1., 0., 0.])), ('HT6W47', ': ', array([37, 0, 1, 0]), ' ', array([ 0.97368421, 0. , 0.02631579, 0. ]), ' ', array([ 1., 0., 0., 0.])), ('HT6W48', ': ', array([24, 30, 0, 0]…	10110111111	0.933257	0.490617	0.998297	1
810	16	9983655	CTGxTAT	T	A	[('HT6W37', ': ', array([ 1, 40, 0, 0]), ' ', array([ 0.02439024, 0.97560976, 0. , 0. ]), ' ', array([ 0., 1., 0., 0.])), ('HT6W45', ': ', array([13, 12, 0, 0]), ' ', array([ 0.52, 0.48, 0. , 0. ]), ' ', array([ 1., 1., 0., 0.])), ('HT6W47', ': ', array([ 0, 54, 0, 1]), ' ', array([ 0. , 0.98181818, 0. , 0.01818182]), ' ', array([ 0., 1., 0., 0.])), ('HT6W48', ': ', array([16, 22, 0, 0]), ' ', ar…	10110111111	0.978563	0.501231	1	1
811	16	12873805	GCTxGCT	T	C	[('HT6W37', ': ', array([ 0, 46, 0, 0]), ' ', array([ 0., 1., 0., 0.]), ' ', array([ 0., 1., 0., 0.])), ('HT6W45', ': ', array([ 0, 19, 19, 1]), ' ', array([ 0. , 0.48717949, 0.48717949, 0.02564103]), ' ', array([ 0., 1., 1., 0.])), ('HT6W47', ': ', array([ 0, 54, 0, 1]), ' ', array([ 0. , 0.98181818, 0. , 0.01818182]), ' ', array([ 0., 1., 0., 0.])), ('HT6W48', ': ', array([ 0, 19, 28, 0]), ' ',…	10110111111	0.993939	0.535107	1	1
812	16	18656327	AAAxAGA	A	G	[('HT6W37', ': ', array([44, 0, 0, 2]), ' ', array([ 0.95652174, 0. , 0. , 0.04347826]), ' ', array([ 1., 0., 0., 0.])), ('HT6W45', ': ', array([49, 0, 0, 15]), ' ', array([ 0.765625, 0. , 0. , 0.234375]), ' ', array([ 1., 0., 0., 1.])), ('HT6W47', ': ', array([58, 0, 1, 0]), ' ', array([ 0.98305085, 0. , 0.01694915, 0. ]), ' ', array([ 1., 0., 0., 0.])), ('HT6W48', ': ', array([40, 0, 0, 19]), '…	10110111111	0.979858	0.250114	0.999969	1
813	16	23173163	GTAxGCC	A	T	[('HT6W37', ': ', array([40, 4, 0, 0]), ' ', array([ 0.90909091, 0.09090909, 0. , 0. ]), ' ', array([ 1., 0., 0., 0.])), ('HT6W45', ': ', array([ 7, 21, 0, 0]), ' ', array([ 0.25, 0.75, 0. , 0. ]), ' ', array([ 1., 1., 0., 0.])), ('HT6W47', ': ', array([31, 0, 0, 0]), ' ', array([ 1., 0., 0., 0.]), ' ', array([ 1., 0., 0., 0.])), ('HT6W48', ': ', array([22, 20, 0, 0]), ' ', array([ 0.52380952, 0.…	10110111111	0.969697	0.510715	1	1
814	16	26151907	TGAxAGT	G	T	[('HT6W37', ': ', array([ 0, 0, 0, 40]), ' ', array([ 0., 0., 0., 1.]), ' ', array([ 0., 0., 0., 1.])), ('HT6W45', ': ', array([ 0, 18, 0, 9]), ' ', array([ 0. , 0.66666667, 0. , 0.33333333]), ' ', array([ 0., 1., 0., 1.])), ('HT6W47', ': ', array([ 0, 0, 0, 32]), ' ', array([ 0., 0., 0., 1.]), ' ', array([ 0., 0., 0., 1.])), ('HT6W48', ': ', array([ 0, 18, 0, 23]), ' ', array([ 0. , 0.43902439, …	10110111111	1	0.462144	1	1
815	16	53510071	CTAxATT	A	C	[('HT6W37', ': ', array([20, 0, 1, 0]), ' ', array([ 0.95238095, 0. , 0.04761905, 0. ]), ' ', array([ 1., 0., 0., 0.])), ('HT6W45', ': ', array([ 0, 0, 17, 0]), ' ', array([ 0., 0., 1., 0.]), ' ', array([ 0., 0., 1., 0.])), ('HT6W47', ': ', array([23, 0, 0, 1]), ' ', array([ 0.95833333, 0. , 0. , 0.04166667]), ' ', array([ 1., 0., 0., 0.])), ('HT6W48', ': ', array([ 0, 0, 15, 0]), ' ', array([ 0.…	10110111111	0.970238	0.994565	1	1
816	16	57974056	CTGxAAG	T	C	[('HT6W37', ': ', array([ 0, 26, 3, 0]), ' ', array([ 0. , 0.89655172, 0.10344828, 0. ]), ' ', array([ 0., 1., 0., 0.])), ('HT6W45', ': ', array([ 0, 0, 17, 0]), ' ', array([ 0., 0., 1., 0.]), ' ', array([ 0., 0., 1., 0.])), ('HT6W47', ': ', array([ 0, 24, 0, 0]), ' ', array([ 0., 1., 0., 0.]), ' ', array([ 0., 1., 0., 0.])), ('HT6W48', ': ', array([ 0, 0, 21, 1]), ' ', array([ 0. , 0. , 0.954545…	10110111111	0.965517	0.994318	1	1
817	16	67548255	TAAxATT	A	C	[('HT6W37', ': ', array([10, 0, 2, 0]), ' ', array([ 0.83333333, 0. , 0.16666667, 0. ]), ' ', array([ 1., 0., 0., 0.])), ('HT6W45', ': ', array([ 0, 0, 14, 0]), ' ', array([ 0., 0., 1., 0.]), ' ', array([ 0., 0., 1., 0.])), ('HT6W47', ': ', array([18, 0, 0, 0]), ' ', array([ 1., 0., 0., 0.]), ' ', array([ 1., 0., 0., 0.])), ('HT6W48', ': ', array([ 0, 0, 24, 2]), ' ', array([ 0. , 0. , 0.92307692…	10110111111	0.944444	0.971208	1	1
818	16	69831932	TGTxTTT	C	T	[('HT6W37', ': ', array([ 0, 1, 52, 0]), ' ', array([ 0. , 0.01886792, 0.98113208, 0. ]), ' ', array([ 0., 0., 1., 0.])), ('HT6W45', ': ', array([ 0, 29, 18, 0]), ' ', array([ 0. , 0.61702128, 0.38297872, 0. ]), ' ', array([ 0., 1., 1., 0.])), ('HT6W47', ': ', array([ 0, 0, 51, 0]), ' ', array([ 0., 0., 1., 0.]), ' ', array([ 0., 0., 1., 0.])), ('HT6W48', ': ', array([ 0, 27, 19, 0]), ' ', array(…	10110111111	0.993711	0.514685	1	1
819	16	76524733	AGGxGTA	T	C	[('HT6W37', ': ', array([ 0, 37, 0, 2]), ' ', array([ 0. , 0.94871795, 0. , 0.05128205]), ' ', array([ 0., 1., 0., 0.])), ('HT6W45', ': ', array([ 0, 22, 12, 0]), ' ', array([ 0. , 0.64705882, 0.35294118, 0. ]), ' ', array([ 0., 1., 1., 0.])), ('HT6W47', ': ', array([ 0, 32, 0, 0]), ' ', array([ 0., 1., 0., 0.]), ' ', array([ 0., 1., 0., 0.])), ('HT6W48', ': ', array([ 0, 23, 17, 0]), ' ', array(…	10110111111	0.982906	0.45216	1	1
820	16	79222896	AAAxCTT	G	A	[('HT6W37', ': ', array([ 5, 0, 0, 35]), ' ', array([ 0.125, 0. , 0. , 0.875]), ' ', array([ 0., 0., 0., 1.])), ('HT6W45', ': ', array([18, 0, 0, 17]), ' ', array([ 0.51428571, 0. , 0. , 0.48571429]), ' ', array([ 1., 0., 0., 1.])), ('HT6W47', ': ', array([ 0, 0, 0, 42]), ' ', array([ 0., 0., 0., 1.]), ' ', array([ 0., 0., 0., 1.])), ('HT6W48', ': ', array([15, 0, 0, 23]), ' ', array([ 0.39473684…	10110111111	0.958333	0.552337	1	1
821	16	83231301	CCTxGTA	T	C	[('HT6W37', ': ', array([ 0, 37, 0, 0]), ' ', array([ 0., 1., 0., 0.]), ' ', array([ 0., 1., 0., 0.])), ('HT6W45', ': ', array([ 0, 18, 14, 0]), ' ', array([ 0. , 0.5625, 0.4375, 0. ]), ' ', array([ 0., 1., 1., 0.])), ('HT6W47', ': ', array([ 0, 40, 0, 0]), ' ', array([ 0., 1., 0., 0.]), ' ', array([ 0., 1., 0., 0.])), ('HT6W48', ': ', array([ 0, 23, 15, 0]), ' ', array([ 0. , 0.60526316, 0.39473…	10110111111	0.992754	0.459345	1	1
822	17	16849154	CGTxTGT	C	A	[('HT6W37', ': ', array([ 1, 0, 40, 0]), ' ', array([ 0.02439024, 0. , 0.97560976, 0. ]), ' ', array([ 0., 0., 1., 0.])), ('HT6W45', ': ', array([14, 0, 10, 0]), ' ', array([ 0.58333333, 0. , 0.41666667, 0. ]), ' ', array([ 1., 0., 1., 0.])), ('HT6W47', ': ', array([ 1, 0, 40, 0]), ' ', array([ 0.02439024, 0. , 0.97560976, 0. ]), ' ', array([ 0., 0., 1., 0.])), ('HT6W48', ': ', array([21, 0, 26, …	10110111111	0.98374	0.488688	1	1
823	18	6168128	GAAxGAC	G	T	[('HT6W37', ': ', array([ 1, 2, 0, 50]), ' ', array([ 0.01886792, 0.03773585, 0. , 0.94339623]), ' ', array([ 0., 0., 0., 1.])), ('HT6W45', ': ', array([ 0, 14, 0, 18]), ' ', array([ 0. , 0.4375, 0. , 0.5625]), ' ', array([ 0., 1., 0., 1.])), ('HT6W47', ': ', array([ 0, 0, 0, 38]), ' ', array([ 0., 0., 0., 1.]), ' ', array([ 0., 0., 0., 1.])), ('HT6W48', ': ', array([ 0, 17, 0, 19]), ' ', array([…	10110111111	0.981132	0.444705	1	1
824	18	7427793	ACAxGTT	G	T	[('HT6W37', ': ', array([ 0, 0, 0, 32]), ' ', array([ 0., 0., 0., 1.]), ' ', array([ 0., 0., 0., 1.])), ('HT6W45', ': ', array([ 0, 17, 0, 17]), ' ', array([ 0. , 0.5, 0. , 0.5]), ' ', array([ 0., 1., 0., 1.])), ('HT6W47', ': ', array([ 0, 0, 0, 39]), ' ', array([ 0., 0., 0., 1.]), ' ', array([ 0., 0., 0., 1.])), ('HT6W48', ': ', array([ 0, 23, 0, 16]), ' ', array([ 0. , 0.58974359, 0. , 0.410256…	10110111111	1	0.519797	1	1
825	18	22953304	GAGxGGC	G	A	[('HT6W37', ': ', array([ 2, 0, 0, 36]), ' ', array([ 0.05263158, 0. , 0. , 0.94736842]), ' ', array([ 0., 0., 0., 1.])), ('HT6W45', ': ', array([26, 0, 0, 18]), ' ', array([ 0.59090909, 0. , 0. , 0.40909091]), ' ', array([ 1., 0., 0., 1.])), ('HT6W47', ': ', array([ 0, 0, 0, 46]), ' ', array([ 0., 0., 0., 1.]), ' ', array([ 0., 0., 0., 1.])), ('HT6W48', ': ', array([17, 0, 0, 22]), ' ', array([ …	10110111111	0.982456	0.491289	1	1
826	18	33459466	ATAxAAA	G	T	[('HT6W37', ': ', array([ 0, 2, 0, 35]), ' ', array([ 0. , 0.05405405, 0. , 0.94594595]), ' ', array([ 0., 0., 0., 1.])), ('HT6W45', ': ', array([ 0, 24, 0, 18]), ' ', array([ 0. , 0.57142857, 0. , 0.42857143]), ' ', array([ 0., 1., 0., 1.])), ('HT6W47', ': ', array([ 1, 1, 0, 41]), ' ', array([ 0.02325581, 0.02325581, 0. , 0.95348837]), ' ', array([ 0., 0., 0., 1.])), ('HT6W48', ': ', array([ 0,…	10110111111	0.959942	0.533138	1	1
827	18	65022174	AATxTTT	A	C	[('HT6W37', ': ', array([25, 0, 0, 0]), ' ', array([ 1., 0., 0., 0.]), ' ', array([ 1., 0., 0., 0.])), ('HT6W45', ': ', array([20, 0, 15, 0]), ' ', array([ 0.57142857, 0. , 0.42857143, 0. ]), ' ', array([ 1., 0., 1., 0.])), ('HT6W47', ': ', array([39, 0, 1, 0]), ' ', array([ 0.975, 0. , 0.025, 0. ]), ' ', array([ 1., 0., 0., 0.])), ('HT6W48', ': ', array([16, 0, 23, 0]), ' ', array([ 0.41025641, …	10110111111	0.982895	0.51558	1	1
828	18	69240952	CAAxATT	G	T	[('HT6W37', ': ', array([ 0, 1, 0, 32]), ' ', array([ 0. , 0.03030303, 0. , 0.96969697]), ' ', array([ 0., 0., 0., 1.])), ('HT6W45', ': ', array([ 0, 23, 0, 21]), ' ', array([ 0. , 0.52272727, 0. , 0.47727273]), ' ', array([ 0., 1., 0., 1.])), ('HT6W47', ': ', array([ 0, 1, 0, 48]), ' ', array([ 0. , 0.02040816, 0. , 0.97959184]), ' ', array([ 0., 0., 0., 1.])), ('HT6W48', ': ', array([ 0, 24, 0,…	10110111111	0.983096	0.455048	1	1
829	19	17547320	TTCxACG	G	A	[('HT6W37', ': ', array([ 0, 0, 0, 50]), ' ', array([ 0., 0., 0., 1.]), ' ', array([ 0., 0., 0., 1.])), ('HT6W45', ': ', array([15, 0, 0, 22]), ' ', array([ 0.40540541, 0. , 0. , 0.59459459]), ' ', array([ 1., 0., 0., 1.])), ('HT6W47', ': ', array([ 0, 1, 0, 43]), ' ', array([ 0. , 0.02272727, 0. , 0.97727273]), ' ', array([ 0., 0., 0., 1.])), ('HT6W48', ': ', array([31, 0, 1, 17]), ' ', array([ …	10110111111	0.992424	0.536043	1	1
830	19	17958044	GGCxCCC	G	A	[('HT6W37', ': ', array([ 0, 0, 0, 36]), ' ', array([ 0., 0., 0., 1.]), ' ', array([ 0., 0., 0., 1.])), ('HT6W45', ': ', array([23, 0, 0, 0]), ' ', array([ 1., 0., 0., 0.]), ' ', array([ 1., 0., 0., 0.])), ('HT6W47', ': ', array([ 0, 0, 0, 22]), ' ', array([ 0., 0., 0., 1.]), ' ', array([ 0., 0., 0., 1.])), ('HT6W48', ': ', array([28, 0, 0, 0]), ' ', array([ 1., 0., 0., 0.]), ' ', array([ 1., 0.,…	10110111111	1	0.966044	1	1
831	19	35831827	GCCxATT	G	A	[('HT6W37', ': ', array([ 0, 0, 0, 28]), ' ', array([ 0., 0., 0., 1.]), ' ', array([ 0., 0., 0., 1.])), ('HT6W45', ': ', array([12, 0, 1, 15]), ' ', array([ 0.42857143, 0. , 0.03571429, 0.53571429]), ' ', array([ 1., 0., 0., 1.])), ('HT6W47', ': ', array([ 0, 0, 0, 57]), ' ', array([ 0., 0., 0., 1.]), ' ', array([ 0., 0., 0., 1.])), ('HT6W48', ': ', array([20, 0, 0, 19]), ' ', array([ 0.51282051,…	10110111111	1	0.533486	1	1
832	19	36926723	AAAxAAG	G	T	[('HT6W37', ': ', array([ 0, 0, 0, 35]), ' ', array([ 0., 0., 0., 1.]), ' ', array([ 0., 0., 0., 1.])), ('HT6W45', ': ', array([ 0, 20, 0, 20]), ' ', array([ 0. , 0.5, 0. , 0.5]), ' ', array([ 0., 1., 0., 1.])), ('HT6W47', ': ', array([ 0, 0, 0, 47]), ' ', array([ 0., 0., 0., 1.]), ' ', array([ 0., 0., 0., 1.])), ('HT6W48', ': ', array([ 0, 18, 0, 19]), ' ', array([ 0. , 0.48648649, 0. , 0.513513…	10110111111	1	0.439923	1	1
833	20	54620082	GCAxAAC	A	C	[('HT6W37', ': ', array([41, 0, 2, 0]), ' ', array([ 0.95348837, 0. , 0.04651163, 0. ]), ' ', array([ 1., 0., 0., 0.])), ('HT6W45', ': ', array([23, 0, 20, 0]), ' ', array([ 0.53488372, 0. , 0.46511628, 0. ]), ' ', array([ 1., 0., 1., 0.])), ('HT6W47', ': ', array([39, 0, 0, 0]), ' ', array([ 1., 0., 0., 0.]), ' ', array([ 1., 0., 0., 0.])), ('HT6W48', ': ', array([18, 0, 20, 0]), ' ', array([ 0.…	10110111111	0.984496	0.479554	1	1
834	21	22377731	GGAxAAA	A	C	[('HT6W37', ': ', array([24, 0, 2, 0]), ' ', array([ 0.92307692, 0. , 0.07692308, 0. ]), ' ', array([ 1., 0., 0., 0.])), ('HT6W45', ': ', array([21, 0, 24, 0]), ' ', array([ 0.46666667, 0. , 0.53333333, 0. ]), ' ', array([ 1., 0., 1., 0.])), ('HT6W47', ': ', array([32, 0, 1, 0]), ' ', array([ 0.96969697, 0. , 0.03030303, 0. ]), ' ', array([ 1., 0., 0., 0.])), ('HT6W48', ': ', array([23, 0, 27, 0]…	10110111111	0.964258	0.49131	0.998463	1
835	21	37059136	TGAxAAA	G	T	[('HT6W37', ': ', array([ 0, 0, 0, 36]), ' ', array([ 0., 0., 0., 1.]), ' ', array([ 0., 0., 0., 1.])), ('HT6W45', ': ', array([ 0, 17, 0, 23]), ' ', array([ 0. , 0.425, 0. , 0.575]), ' ', array([ 0., 1., 0., 1.])), ('HT6W47', ': ', array([ 0, 0, 1, 41]), ' ', array([ 0. , 0. , 0.02380952, 0.97619048]), ' ', array([ 0., 0., 0., 1.])), ('HT6W48', ': ', array([ 0, 22, 0, 25]), ' ', array([ 0. , 0.4…	10110111111	0.992063	0.500995	1	1
836	22	41515738	AAAxATC	A	C	[('HT6W37', ': ', array([44, 0, 0, 0]), ' ', array([ 1., 0., 0., 0.]), ' ', array([ 1., 0., 0., 0.])), ('HT6W45', ': ', array([13, 0, 13, 0]), ' ', array([ 0.5, 0. , 0.5, 0. ]), ' ', array([ 1., 0., 1., 0.])), ('HT6W47', ': ', array([47, 1, 0, 0]), ' ', array([ 0.97916667, 0.02083333, 0. , 0. ]), ' ', array([ 1., 0., 0., 0.])), ('HT6W48', ': ', array([20, 0, 28, 0]), ' ', array([ 0.41666667, 0. ,…	10110111111	0.993056	0.520292	1	1
837	X	19355186	GACxAAG	G	A	[('HT6W37', ': ', array([ 0, 0, 0, 11]), ' ', array([ 0., 0., 0., 1.]), ' ', array([ 0., 0., 0., 1.])), ('HT6W45', ': ', array([17, 0, 0, 0]), ' ', array([ 1., 0., 0., 0.]), ' ', array([ 1., 0., 0., 0.])), ('HT6W47', ': ', array([ 0, 0, 0, 17]), ' ', array([ 0., 0., 0., 1.]), ' ', array([ 0., 0., 0., 1.])), ('HT6W48', ': ', array([14, 0, 1, 0]), ' ', array([ 0.93333333, 0. , 0.06666667, 0. ]), ' …	10110111111	1	0.975255	1	1
838	X	110197050	ACGxACA	A	G	[('HT6W37', ': ', array([11, 0, 0, 2]), ' ', array([ 0.84615385, 0. , 0. , 0.15384615]), ' ', array([ 1., 0., 0., 0.])), ('HT6W45', ': ', array([ 0, 0, 0, 22]), ' ', array([ 0., 0., 0., 1.]), ' ', array([ 0., 0., 0., 1.])), ('HT6W47', ': ', array([19, 0, 0, 0]), ' ', array([ 1., 0., 0., 0.]), ' ', array([ 1., 0., 0., 0.])), ('HT6W48', ': ', array([ 0, 0, 0, 15]), ' ', array([ 0., 0., 0., 1.]), ' …	10110111111	0.948718	0.981481	1	1
839	X	116294876	AAAxAAT	T	G	[('HT6W37', ': ', array([ 0, 16, 0, 2]), ' ', array([ 0. , 0.88888889, 0. , 0.11111111]), ' ', array([ 0., 1., 0., 0.])), ('HT6W45', ': ', array([ 0, 0, 0, 18]), ' ', array([ 0., 0., 0., 1.]), ' ', array([ 0., 0., 0., 1.])), ('HT6W47', ': ', array([ 0, 23, 0, 0]), ' ', array([ 0., 1., 0., 0.]), ' ', array([ 0., 1., 0., 0.])), ('HT6W48', ': ', array([ 0, 0, 0, 19]), ' ', array([ 0., 0., 0., 1.]), …	10110111111	0.962963	0.995192	1	1
840	X	121772519	AATxTTT	C	A	[('HT6W37', ': ', array([ 2, 0, 15, 0]), ' ', array([ 0.11764706, 0. , 0.88235294, 0. ]), ' ', array([ 0., 0., 1., 0.])), ('HT6W45', ': ', array([15, 0, 0, 0]), ' ', array([ 1., 0., 0., 0.]), ' ', array([ 1., 0., 0., 0.])), ('HT6W47', ': ', array([ 0, 0, 18, 0]), ' ', array([ 0., 0., 1., 0.]), ' ', array([ 0., 0., 1., 0.])), ('HT6W48', ': ', array([22, 0, 0, 0]), ' ', array([ 1., 0., 0., 0.]), ' …	10110111111	0.960784	0.984722	1	1
841	X	121806033	CGTxTGT	G	C	[('HT6W37', ': ', array([0, 0, 0, 9]), ' ', array([ 0., 0., 0., 1.]), ' ', array([ 0., 0., 0., 1.])), ('HT6W45', ': ', array([ 0, 0, 26, 0]), ' ', array([ 0., 0., 1., 0.]), ' ', array([ 0., 0., 1., 0.])), ('HT6W47', ': ', array([ 0, 0, 0, 16]), ' ', array([ 0., 0., 0., 1.]), ' ', array([ 0., 0., 0., 1.])), ('HT6W48', ': ', array([ 0, 0, 21, 3]), ' ', array([ 0. , 0. , 0.875, 0.125]), ' ', array([…	10110111111	1	0.946554	1	1
842	X	155153049	ATTxTTT	C	A	[('HT6W37', ': ', array([ 1, 0, 19, 0]), ' ', array([ 0.05, 0. , 0.95, 0. ]), ' ', array([ 0., 0., 1., 0.])), ('HT6W45', ': ', array([14, 0, 0, 0]), ' ', array([ 1., 0., 0., 0.]), ' ', array([ 1., 0., 0., 0.])), ('HT6W47', ': ', array([ 0, 0, 22, 0]), ' ', array([ 0., 0., 1., 0.]), ' ', array([ 0., 0., 1., 0.])), ('HT6W48', ': ', array([25, 0, 0, 0]), ' ', array([ 1., 0., 0., 0.]), ' ', array([ 1…	10110111111	0.983333	1	1	1
843	1	5820645	CTCxTTC	C	A	[('HT6W37', ': ', array([ 0, 0, 43, 0]), ' ', array([ 0., 0., 1., 0.]), ' ', array([ 0., 0., 1., 0.])), ('HT6W45', ': ', array([18, 0, 20, 0]), ' ', array([ 0.47368421, 0. , 0.52631579, 0. ]), ' ', array([ 1., 0., 1., 0.])), ('HT6W47', ': ', array([ 0, 0, 38, 0]), ' ', array([ 0., 0., 1., 0.]), ' ', array([ 0., 0., 1., 0.])), ('HT6W48', ': ', array([16, 0, 30, 0]), ' ', array([ 0.34782609, 0. , 0…	10100001101	1	0.444397	1	1
844	1	8977527	AAAxAAA	A	C	[('HT6W37', ': ', array([42, 0, 3, 0]), ' ', array([ 0.93333333, 0. , 0.06666667, 0. ]), ' ', array([ 1., 0., 0., 0.])), ('HT6W45', ': ', array([22, 0, 21, 0]), ' ', array([ 0.51162791, 0. , 0.48837209, 0. ]), ' ', array([ 1., 0., 1., 0.])), ('HT6W47', ': ', array([37, 0, 0, 0]), ' ', array([ 1., 0., 0., 0.]), ' ', array([ 1., 0., 0., 0.])), ('HT6W48', ': ', array([25, 0, 27, 0]), ' ', array([ 0.…	10100001101	0.98193	0.512002	1	1
845	1	11062714	CTGxCTC	T	C	[('HT6W37', ': ', array([ 0, 38, 0, 0]), ' ', array([ 0., 1., 0., 0.]), ' ', array([ 0., 1., 0., 0.])), ('HT6W45', ': ', array([ 0, 17, 21, 0]), ' ', array([ 0. , 0.44736842, 0.55263158, 0. ]), ' ', array([ 0., 1., 1., 0.])), ('HT6W47', ': ', array([ 0, 31, 0, 1]), ' ', array([ 0. , 0.96875, 0. , 0.03125]), ' ', array([ 0., 1., 0., 0.])), ('HT6W48', ': ', array([ 1, 24, 14, 0]), ' ', array([ 0.02…	10100000100	0.986263	0.465201	1	1
846	1	11421427	GAAxGTG	G	A	[('HT6W37', ': ', array([ 0, 0, 0, 41]), ' ', array([ 0., 0., 0., 1.]), ' ', array([ 0., 0., 0., 1.])), ('HT6W45', ': ', array([16, 0, 0, 13]), ' ', array([ 0.55172414, 0. , 0. , 0.44827586]), ' ', array([ 1., 0., 0., 1.])), ('HT6W47', ': ', array([ 0, 0, 0, 52]), ' ', array([ 0., 0., 0., 1.]), ' ', array([ 0., 0., 0., 1.])), ('HT6W48', ': ', array([17, 0, 0, 23]), ' ', array([ 0.425, 0. , 0. , 0…	10100001101	0.98607	0.526476	1	1
847	1	14256267	AGAxAAT	G	T	[('HT6W37', ': ', array([ 0, 1, 1, 33]), ' ', array([ 0. , 0.02857143, 0.02857143, 0.94285714]), ' ', array([ 0., 0., 0., 1.])), ('HT6W45', ': ', array([ 0, 11, 0, 20]), ' ', array([ 0. , 0.35483871, 0. , 0.64516129]), ' ', array([ 0., 1., 0., 1.])), ('HT6W47', ': ', array([ 0, 0, 0, 48]), ' ', array([ 0., 0., 0., 1.]), ' ', array([ 0., 0., 0., 1.])), ('HT6W48', ': ', array([ 0, 17, 0, 28]), ' ',…	10100001101	0.987228	0.421087	1	1
848	1	25753494	TGAxCTG	G	A	[('HT6W37', ': ', array([ 2, 0, 0, 37]), ' ', array([ 0.05128205, 0. , 0. , 0.94871795]), ' ', array([ 0., 0., 0., 1.])), ('HT6W45', ': ', array([20, 0, 0, 15]), ' ', array([ 0.57142857, 0. , 0. , 0.42857143]), ' ', array([ 1., 0., 0., 1.])), ('HT6W47', ': ', array([ 0, 0, 0, 37]), ' ', array([ 0., 0., 0., 1.]), ' ', array([ 0., 0., 0., 1.])), ('HT6W48', ': ', array([20, 0, 0, 29]), ' ', array([ …	10100001101	0.989427	0.491814	1	1
849	1	33746858	TTGxGAA	A	T	[('HT6W37', ': ', array([36, 0, 1, 0]), ' ', array([ 0.97297297, 0. , 0.02702703, 0. ]), ' ', array([ 1., 0., 0., 0.])), ('HT6W45', ': ', array([14, 21, 0, 0]), ' ', array([ 0.4, 0.6, 0. , 0. ]), ' ', array([ 1., 1., 0., 0.])), ('HT6W47', ': ', array([45, 0, 2, 0]), ' ', array([ 0.95744681, 0. , 0.04255319, 0. ]), ' ', array([ 1., 0., 0., 0.])), ('HT6W48', ': ', array([22, 16, 0, 0]), ' ', array(…	10100000100	0.98703	0.448622	1	1
850	1	34213537	AAAxGGA	A	T	[('HT6W37', ': ', array([40, 0, 0, 0]), ' ', array([ 1., 0., 0., 0.]), ' ', array([ 1., 0., 0., 0.])), ('HT6W45', ': ', array([19, 19, 0, 0]), ' ', array([ 0.5, 0.5, 0. , 0. ]), ' ', array([ 1., 1., 0., 0.])), ('HT6W47', ': ', array([42, 0, 0, 1]), ' ', array([ 0.97674419, 0. , 0. , 0.02325581]), ' ', array([ 1., 0., 0., 0.])), ('HT6W48', ': ', array([12, 27, 1, 0]), ' ', array([ 0.3 , 0.675, 0.0…	10100001101	0.996678	0.620486	1	1
851	1	35047060	TGGxAGT	G	T	[('HT6W37', ': ', array([ 0, 0, 0, 34]), ' ', array([ 0., 0., 0., 1.]), ' ', array([ 0., 0., 0., 1.])), ('HT6W45', ': ', array([ 0, 12, 0, 22]), ' ', array([ 0. , 0.35294118, 0. , 0.64705882]), ' ', array([ 0., 1., 0., 1.])), ('HT6W47', ': ', array([ 0, 0, 1, 37]), ' ', array([ 0. , 0. , 0.02631579, 0.97368421]), ' ', array([ 0., 0., 0., 1.])), ('HT6W48', ': ', array([ 0, 17, 0, 19]), ' ', array(…	10100001101	0.992578	0.559885	1	1
852	1	37367881	ATAxTGA	T	C	[('HT6W37', ': ', array([ 1, 40, 4, 1]), ' ', array([ 0.02173913, 0.86956522, 0.08695652, 0.02173913]), ' ', array([ 0., 1., 0., 0.])), ('HT6W45', ': ', array([ 0, 22, 17, 0]), ' ', array([ 0. , 0.56410256, 0.43589744, 0. ]), ' ', array([ 0., 1., 1., 0.])), ('HT6W47', ': ', array([ 0, 45, 1, 0]), ' ', array([ 0. , 0.97826087, 0.02173913, 0. ]), ' ', array([ 0., 1., 0., 0.])), ('HT6W48', ': ', arr…	10100001101	0.978261	0.49942	1	1
853	1	42089364	ATGxGCA	T	C	[('HT6W37', ': ', array([ 0, 44, 3, 0]), ' ', array([ 0. , 0.93617021, 0.06382979, 0. ]), ' ', array([ 0., 1., 0., 0.])), ('HT6W45', ': ', array([ 0, 26, 8, 0]), ' ', array([ 0. , 0.76470588, 0.23529412, 0. ]), ' ', array([ 0., 1., 1., 0.])), ('HT6W47', ': ', array([ 0, 43, 0, 0]), ' ', array([ 0., 1., 0., 0.]), ' ', array([ 0., 1., 0., 0.])), ('HT6W48', ': ', array([ 0, 16, 23, 0]), ' ', array([…	10100001101	0.984053	0.562597	0.999887	1
854	1	48716042	AAAxTTG	A	C	[('HT6W37', ': ', array([27, 0, 0, 0]), ' ', array([ 1., 0., 0., 0.]), ' ', array([ 1., 0., 0., 0.])), ('HT6W45', ': ', array([21, 0, 10, 0]), ' ', array([ 0.67741935, 0. , 0.32258065, 0. ]), ' ', array([ 1., 0., 1., 0.])), ('HT6W47', ': ', array([30, 1, 0, 0]), ' ', array([ 0.96774194, 0.03225806, 0. , 0. ]), ' ', array([ 1., 0., 0., 0.])), ('HT6W48', ': ', array([32, 0, 25, 0]), ' ', array([ 0.…	10100000100	0.996416	0.455409	1	1
855	1	58599694	TAGxTGT	C	T	[('HT6W37', ': ', array([ 0, 0, 42, 0]), ' ', array([ 0., 0., 1., 0.]), ' ', array([ 0., 0., 1., 0.])), ('HT6W45', ': ', array([ 0, 15, 14, 0]), ' ', array([ 0. , 0.51724138, 0.48275862, 0. ]), ' ', array([ 0., 1., 1., 0.])), ('HT6W47', ': ', array([ 0, 0, 38, 0]), ' ', array([ 0., 0., 1., 0.]), ' ', array([ 0., 0., 1., 0.])), ('HT6W48', ': ', array([ 0, 24, 20, 0]), ' ', array([ 0. , 0.54545455,…	10100001101	0.993789	0.500253	1	1
856	1	58873646	CTCxTCA	C	A	[('HT6W37', ': ', array([ 0, 0, 32, 0]), ' ', array([ 0., 0., 1., 0.]), ' ', array([ 0., 0., 1., 0.])), ('HT6W45', ': ', array([13, 0, 11, 0]), ' ', array([ 0.54166667, 0. , 0.45833333, 0. ]), ' ', array([ 1., 0., 1., 0.])), ('HT6W47', ': ', array([ 0, 0, 34, 0]), ' ', array([ 0., 0., 1., 0.]), ' ', array([ 0., 0., 1., 0.])), ('HT6W48', ': ', array([16, 0, 16, 0]), ' ', array([ 0.5, 0. , 0.5, 0. …	10100001101	1	0.484565	1	1
857	1	72878732	ATAxGGA	G	T	[('HT6W37', ': ', array([ 0, 0, 0, 22]), ' ', array([ 0., 0., 0., 1.]), ' ', array([ 0., 0., 0., 1.])), ('HT6W45', ': ', array([ 0, 21, 0, 16]), ' ', array([ 0. , 0.56756757, 0. , 0.43243243]), ' ', array([ 0., 1., 0., 1.])), ('HT6W47', ': ', array([ 0, 0, 0, 51]), ' ', array([ 0., 0., 0., 1.]), ' ', array([ 0., 0., 0., 1.])), ('HT6W48', ': ', array([ 0, 13, 0, 18]), ' ', array([ 0. , 0.41935484,…	10100000100	1	0.482405	1	1
858	1	77429348	GTCxTCT	C	T	[('HT6W37', ': ', array([ 1, 0, 38, 0]), ' ', array([ 0.02564103, 0. , 0.97435897, 0. ]), ' ', array([ 0., 0., 1., 0.])), ('HT6W45', ': ', array([ 0, 17, 23, 0]), ' ', array([ 0. , 0.425, 0.575, 0. ]), ' ', array([ 0., 1., 1., 0.])), ('HT6W47', ': ', array([ 0, 0, 60, 0]), ' ', array([ 0., 0., 1., 0.]), ' ', array([ 0., 0., 1., 0.])), ('HT6W48', ': ', array([ 0, 14, 16, 0]), ' ', array([ 0. , 0.4…	10100001101	0.996337	0.524996	1	1
859	1	80357036	AGAxTTG	G	A	[('HT6W37', ': ', array([ 0, 0, 0, 31]), ' ', array([ 0., 0., 0., 1.]), ' ', array([ 0., 0., 0., 1.])), ('HT6W45', ': ', array([23, 0, 0, 19]), ' ', array([ 0.54761905, 0. , 0. , 0.45238095]), ' ', array([ 1., 0., 0., 1.])), ('HT6W47', ': ', array([ 0, 1, 0, 49]), ' ', array([ 0. , 0.02, 0. , 0.98]), ' ', array([ 0., 0., 0., 1.])), ('HT6W48', ': ', array([18, 0, 0, 27]), ' ', array([ 0.4, 0. , 0.…	10100000100	0.997778	0.469231	1	1
860	1	80727431	AAGxAAT	A	T	[('HT6W37', ': ', array([38, 0, 1, 0]), ' ', array([ 0.97435897, 0. , 0.02564103, 0. ]), ' ', array([ 1., 0., 0., 0.])), ('HT6W45', ': ', array([20, 18, 0, 0]), ' ', array([ 0.52631579, 0.47368421, 0. , 0. ]), ' ', array([ 1., 1., 0., 0.])), ('HT6W47', ': ', array([31, 0, 0, 0]), ' ', array([ 1., 0., 0., 0.]), ' ', array([ 1., 0., 0., 0.])), ('HT6W48', ': ', array([21, 28, 0, 0]), ' ', array([ 0.…	10100000100	0.997151	0.542125	1	1
861	1	86504414	AAAxCTA	G	A	[('HT6W37', ': ', array([ 0, 0, 0, 45]), ' ', array([ 0., 0., 0., 1.]), ' ', array([ 0., 0., 0., 1.])), ('HT6W45', ': ', array([13, 0, 1, 21]), ' ', array([ 0.37142857, 0. , 0.02857143, 0.6 ]), ' ', array([ 1., 0., 0., 1.])), ('HT6W47', ': ', array([ 0, 0, 0, 39]), ' ', array([ 0., 0., 0., 1.]), ' ', array([ 0., 0., 0., 1.])), ('HT6W48', ': ', array([17, 0, 0, 22]), ' ', array([ 0.43589744, 0. , …	10100000100	0.993161	0.402159	1	1
862	1	87991570	AGGxGCC	G	A	[('HT6W37', ': ', array([ 0, 0, 0, 46]), ' ', array([ 0., 0., 0., 1.]), ' ', array([ 0., 0., 0., 1.])), ('HT6W45', ': ', array([13, 0, 0, 12]), ' ', array([ 0.52, 0. , 0. , 0.48]), ' ', array([ 1., 0., 0., 1.])), ('HT6W47', ': ', array([ 0, 1, 0, 51]), ' ', array([ 0. , 0.01923077, 0. , 0.98076923]), ' ', array([ 0., 0., 0., 1.])), ('HT6W48', ': ', array([29, 1, 0, 20]), ' ', array([ 0.58, 0.02, …	10100001101	0.988842	0.578517	1	1
[truncated: 11,799 more rows]
