# Supplementary material for: Quantification of somatic mutation flow across individual cell division events by lineage sequencing
Source: HighWire-hosted journal article supplement (doi:10.1101/gr.238543.118), 2018-11-20
Supplement: Supplemental_Table_S3.xlsx [file Supplemental_Table_S3.xlsx]

## Sheet: Supplemental_Table_S3
Supplemental table S3:
The complete SNV lists calculated by the ‘optical tracking -> lineage -> called variants’ approach. For RPE1 lineage, branch variants (663 SNVs) and leaf variants (1322 SNVs). Coordinates are in hg19.
index	chromosome	position	context	reference_allele	alternative_allele	full_data	vector	ref_af	alt_af	Min_prob	Branch[1], leaf[0]
0	1	7650869	GAGxGGG	A	G	[('RPE5W22', ': ', array([41, 0, 0, 23]), ' ', array([ 0.640625, 0. , 0. , 0.359375]), ' ', array([ 1., 0., 0., 1.])), ('RPE5W23', ': ', array([18, 0, 0, 13]), ' ', array([ 0.58064516, 0. , 0. , 0.41935484]), ' ', array([ 1., 0., 0., 1.])), ('RPE5W24', ': ', array([52, 0, 0, 0]), ' ', array([ 1., 0., 0., 0.]), ' ', array([ 1., 0., 0., 0.])), ('RPE5W27', ': ', array([45, 0, 0, 0]), ' ', array([ 1.…	1100000000000	0.98494	0.359375	0.999999	1
1	1	27401566	GTGxCCA	C	A	[('RPE5W22', ': ', array([15, 0, 22, 0]), ' ', array([ 0.40540541, 0. , 0.59459459, 0. ]), ' ', array([ 1., 0., 1., 0.])), ('RPE5W23', ': ', array([ 8, 0, 24, 0]), ' ', array([ 0.25, 0. , 0.75, 0. ]), ' ', array([ 1., 0., 1., 0.])), ('RPE5W24', ': ', array([ 0, 1, 36, 0]), ' ', array([ 0. , 0.02702703, 0.97297297, 0. ]), ' ', array([ 0., 0., 1., 0.])), ('RPE5W27', ': ', array([ 0, 0, 41, 0]), ' '…	1100000000000	0.986375	0.305644	0.999926	1
2	1	36091113	TCCxAGC	T	C	[('RPE5W22', ': ', array([ 0, 35, 18, 0]), ' ', array([ 0. , 0.66037736, 0.33962264, 0. ]), ' ', array([ 0., 1., 1., 0.])), ('RPE5W23', ': ', array([ 0, 31, 18, 0]), ' ', array([ 0. , 0.63265306, 0.36734694, 0. ]), ' ', array([ 0., 1., 1., 0.])), ('RPE5W24', ': ', array([ 0, 35, 0, 0]), ' ', array([ 0., 1., 0., 0.]), ' ', array([ 0., 1., 0., 0.])), ('RPE5W27', ': ', array([ 0, 51, 1, 0]), ' ', ar…	1100000000000	0.971177	0.31687	0.999984	1
3	1	50680362	AAAxATT	A	C	[('RPE5W22', ': ', array([18, 0, 20, 0]), ' ', array([ 0.47368421, 0. , 0.52631579, 0. ]), ' ', array([ 1., 0., 1., 0.])), ('RPE5W23', ': ', array([27, 0, 11, 0]), ' ', array([ 0.71052632, 0. , 0.28947368, 0. ]), ' ', array([ 1., 0., 1., 0.])), ('RPE5W24', ': ', array([34, 0, 0, 0]), ' ', array([ 1., 0., 0., 0.]), ' ', array([ 1., 0., 0., 0.])), ('RPE5W27', ': ', array([38, 0, 0, 0]), ' ', array(…	1100000000000	1	0.477444	1	1
4	1	71568726	GGCxAAA	C	A	[('RPE5W22', ': ', array([14, 0, 43, 0]), ' ', array([ 0.24561404, 0. , 0.75438596, 0. ]), ' ', array([ 1., 0., 1., 0.])), ('RPE5W23', ': ', array([13, 0, 27, 0]), ' ', array([ 0.325, 0. , 0.675, 0. ]), ' ', array([ 1., 0., 1., 0.])), ('RPE5W24', ': ', array([ 1, 0, 43, 0]), ' ', array([ 0.02272727, 0. , 0.97727273, 0. ]), ' ', array([ 0., 0., 1., 0.])), ('RPE5W27', ': ', array([ 0, 0, 39, 0]), '…	1100000000000	0.98467	0.241855	0.991579	1
5	1	71709289	CATxAAT	T	A	[('RPE5W22', ': ', array([12, 46, 0, 0]), ' ', array([ 0.20689655, 0.79310345, 0. , 0. ]), ' ', array([ 1., 1., 0., 0.])), ('RPE5W23', ': ', array([11, 24, 1, 0]), ' ', array([ 0.30555556, 0.66666667, 0.02777778, 0. ]), ' ', array([ 1., 1., 0., 0.])), ('RPE5W24', ': ', array([ 0, 41, 1, 0]), ' ', array([ 0. , 0.97619048, 0.02380952, 0. ]), ' ', array([ 0., 1., 0., 0.])), ('RPE5W27', ': ', array([…	1100000000000	0.982758	0.285266	0.999949	1
6	1	71846292	GTTxTAG	A	T	[('RPE5W22', ': ', array([33, 19, 0, 0]), ' ', array([ 0.63461538, 0.36538462, 0. , 0. ]), ' ', array([ 1., 1., 0., 0.])), ('RPE5W23', ': ', array([25, 11, 0, 0]), ' ', array([ 0.69444444, 0.30555556, 0. , 0. ]), ' ', array([ 1., 1., 0., 0.])), ('RPE5W24', ': ', array([25, 0, 0, 0]), ' ', array([ 1., 0., 0., 0.]), ' ', array([ 1., 0., 0., 0.])), ('RPE5W27', ': ', array([45, 0, 0, 0]), ' ', array(…	1100000000000	0.993753	0.378344	1	1
7	1	71987134	GTTxAGA	G	T	[('RPE5W22', ': ', array([ 1, 18, 0, 27]), ' ', array([ 0.02173913, 0.39130435, 0. , 0.58695652]), ' ', array([ 0., 1., 0., 1.])), ('RPE5W23', ': ', array([ 0, 12, 0, 20]), ' ', array([ 0. , 0.375, 0. , 0.625]), ' ', array([ 0., 1., 0., 1.])), ('RPE5W24', ': ', array([ 1, 0, 0, 41]), ' ', array([ 0.02380952, 0. , 0. , 0.97619048]), ' ', array([ 0., 0., 0., 1.])), ('RPE5W27', ': ', array([ 0, 0, 0…	1100000000000	0.993773	0.398355	0.999997	1
8	1	72027901	AAAxATA	A	T	[('RPE5W22', ': ', array([43, 23, 0, 0]), ' ', array([ 0.65151515, 0.34848485, 0. , 0. ]), ' ', array([ 1., 1., 0., 0.])), ('RPE5W23', ': ', array([30, 17, 0, 0]), ' ', array([ 0.63829787, 0.36170213, 0. , 0. ]), ' ', array([ 1., 1., 0., 0.])), ('RPE5W24', ': ', array([41, 0, 0, 0]), ' ', array([ 1., 0., 0., 0.]), ' ', array([ 1., 0., 0., 0.])), ('RPE5W27', ': ', array([35, 0, 0, 0]), ' ', array(…	1100000000000	0.997222	0.337033	0.999998	1
9	1	72043115	GGAxAAG	G	A	[('RPE5W22', ': ', array([15, 0, 0, 33]), ' ', array([ 0.3125, 0. , 0. , 0.6875]), ' ', array([ 1., 0., 0., 1.])), ('RPE5W23', ': ', array([15, 1, 0, 30]), ' ', array([ 0.32608696, 0.02173913, 0. , 0.65217391]), ' ', array([ 1., 0., 0., 1.])), ('RPE5W24', ': ', array([ 0, 0, 0, 38]), ' ', array([ 0., 0., 0., 1.]), ' ', array([ 0., 0., 0., 1.])), ('RPE5W27', ': ', array([ 0, 0, 0, 37]), ' ', array…	1100000000000	0.992593	0.347426	1	1
10	1	72271433	ATTxAAA	G	A	[('RPE5W22', ': ', array([17, 0, 0, 23]), ' ', array([ 0.425, 0. , 0. , 0.575]), ' ', array([ 1., 0., 0., 1.])), ('RPE5W23', ': ', array([14, 0, 0, 29]), ' ', array([ 0.3255814, 0. , 0. , 0.6744186]), ' ', array([ 1., 0., 0., 1.])), ('RPE5W24', ': ', array([ 0, 0, 0, 40]), ' ', array([ 0., 0., 0., 1.]), ' ', array([ 0., 0., 0., 1.])), ('RPE5W27', ': ', array([ 0, 0, 0, 44]), ' ', array([ 0., 0., …	1100000000000	0.991892	0.397685	1	1
11	1	72336047	CGCxTAA	A	T	[('RPE5W22', ': ', array([26, 20, 0, 1]), ' ', array([ 0.55319149, 0.42553191, 0. , 0.0212766 ]), ' ', array([ 1., 1., 0., 0.])), ('RPE5W23', ': ', array([26, 7, 0, 1]), ' ', array([ 0.76470588, 0.20588235, 0. , 0.02941176]), ' ', array([ 1., 1., 0., 0.])), ('RPE5W24', ': ', array([49, 0, 1, 0]), ' ', array([ 0.98, 0. , 0.02, 0. ]), ' ', array([ 1., 0., 0., 0.])), ('RPE5W27', ': ', array([37, 0, …	1100000000000	0.986125	0.359825	0.999989	1
12	1	73554558	GTTxAAA	G	A	[('RPE5W22', ': ', array([12, 0, 0, 33]), ' ', array([ 0.26666667, 0. , 0. , 0.73333333]), ' ', array([ 1., 0., 0., 1.])), ('RPE5W23', ': ', array([15, 0, 0, 19]), ' ', array([ 0.44117647, 0. , 0. , 0.55882353]), ' ', array([ 1., 0., 0., 1.])), ('RPE5W24', ': ', array([ 0, 1, 0, 43]), ' ', array([ 0. , 0.02272727, 0. , 0.97727273]), ' ', array([ 0., 0., 0., 1.])), ('RPE5W27', ': ', array([ 0, 0, …	1100000000000	0.992849	0.308333	1	1
13	1	143140697	CATxTTC	C	A	[('RPE5W22', ': ', array([21, 0, 87, 0]), ' ', array([ 0.19444444, 0. , 0.80555556, 0. ]), ' ', array([ 0., 0., 1., 0.])), ('RPE5W23', ': ', array([17, 0, 76, 0]), ' ', array([ 0.1827957, 0. , 0.8172043, 0. ]), ' ', array([ 0., 0., 1., 0.])), ('RPE5W24', ': ', array([ 0, 1, 89, 0]), ' ', array([ 0. , 0.01111111, 0.98888889, 0. ]), ' ', array([ 0., 0., 1., 0.])), ('RPE5W27', ': ', array([ 0, 0, 88…	1100000000000	0.985784	0.172222	0.999998	1
14	1	175343118	TGAxCAC	C	T	[('RPE5W22', ': ', array([ 0, 16, 35, 0]), ' ', array([ 0. , 0.31372549, 0.68627451, 0. ]), ' ', array([ 0., 1., 1., 0.])), ('RPE5W23', ': ', array([ 0, 14, 25, 0]), ' ', array([ 0. , 0.35897436, 0.64102564, 0. ]), ' ', array([ 0., 1., 1., 0.])), ('RPE5W24', ': ', array([ 0, 0, 42, 0]), ' ', array([ 0., 0., 1., 0.]), ' ', array([ 0., 0., 1., 0.])), ('RPE5W27', ': ', array([ 0, 0, 33, 0]), ' ', ar…	1100000000000	0.990427	0.313725	0.999977	1
15	1	193618224	TATxAGT	T	G	[('RPE5W22', ': ', array([ 0, 39, 0, 10]), ' ', array([ 0. , 0.79591837, 0. , 0.20408163]), ' ', array([ 0., 1., 0., 1.])), ('RPE5W23', ': ', array([ 0, 18, 0, 12]), ' ', array([ 0. , 0.6, 0. , 0.4]), ' ', array([ 0., 1., 0., 1.])), ('RPE5W24', ': ', array([ 0, 30, 0, 0]), ' ', array([ 0., 1., 0., 0.]), ' ', array([ 0., 1., 0., 0.])), ('RPE5W27', ': ', array([ 0, 34, 0, 0]), ' ', array([ 0., 1., …	1100000000000	1	0.262041	0.999995	1
16	1	207736237	TCAxCAG	C	A	[('RPE5W22', ': ', array([16, 0, 34, 0]), ' ', array([ 0.32, 0. , 0.68, 0. ]), ' ', array([ 1., 0., 1., 0.])), ('RPE5W23', ': ', array([ 5, 0, 25, 0]), ' ', array([ 0.16666667, 0. , 0.83333333, 0. ]), ' ', array([ 0., 0., 1., 0.])), ('RPE5W24', ': ', array([ 0, 0, 23, 0]), ' ', array([ 0., 0., 1., 0.]), ' ', array([ 0., 0., 1., 0.])), ('RPE5W27', ': ', array([ 1, 0, 28, 0]), ' ', array([ 0.034482…	1100000000000	0.993498	0.32	0.997637	1
17	2	26307821	TATxGCA	T	G	[('RPE5W22', ': ', array([ 0, 32, 0, 16]), ' ', array([ 0. , 0.66666667, 0. , 0.33333333]), ' ', array([ 0., 1., 0., 1.])), ('RPE5W23', ': ', array([ 0, 35, 0, 10]), ' ', array([ 0. , 0.77777778, 0. , 0.22222222]), ' ', array([ 0., 1., 0., 1.])), ('RPE5W24', ': ', array([ 0, 38, 0, 0]), ' ', array([ 0., 1., 0., 0.]), ' ', array([ 0., 1., 0., 0.])), ('RPE5W27', ': ', array([ 0, 40, 0, 0]), ' ', ar…	1100000000000	0.994135	0.333333	0.999419	1
18	2	33219919	AACxAAT	C	A	[('RPE5W22', ': ', array([12, 0, 31, 0]), ' ', array([ 0.27906977, 0. , 0.72093023, 0. ]), ' ', array([ 1., 0., 1., 0.])), ('RPE5W23', ': ', array([ 6, 0, 22, 0]), ' ', array([ 0.21428571, 0. , 0.78571429, 0. ]), ' ', array([ 1., 0., 1., 0.])), ('RPE5W24', ': ', array([ 0, 0, 39, 0]), ' ', array([ 0., 0., 1., 0.]), ' ', array([ 0., 0., 1., 0.])), ('RPE5W27', ': ', array([ 0, 0, 39, 0]), ' ', arra…	1100000000000	0.995652	0.327035	0.999558	1
19	2	56860104	TTGxATT	G	C	[('RPE5W22', ': ', array([ 0, 0, 18, 35]), ' ', array([ 0. , 0. , 0.33962264, 0.66037736]), ' ', array([ 0., 0., 1., 1.])), ('RPE5W23', ': ', array([ 0, 0, 11, 22]), ' ', array([ 0. , 0. , 0.33333333, 0.66666667]), ' ', array([ 0., 0., 1., 1.])), ('RPE5W24', ': ', array([ 0, 0, 0, 40]), ' ', array([ 0., 0., 0., 1.]), ' ', array([ 0., 0., 0., 1.])), ('RPE5W27', ': ', array([ 0, 0, 0, 41]), ' ', ar…	1100000000000	0.984356	0.302164	0.999799	1
20	2	56882620	TTGxATG	A	G	[('RPE5W22', ': ', array([35, 0, 0, 23]), ' ', array([ 0.60344828, 0. , 0. , 0.39655172]), ' ', array([ 1., 0., 0., 1.])), ('RPE5W23', ': ', array([34, 0, 0, 19]), ' ', array([ 0.64150943, 0. , 0. , 0.35849057]), ' ', array([ 1., 0., 0., 1.])), ('RPE5W24', ': ', array([42, 0, 0, 0]), ' ', array([ 1., 0., 0., 0.]), ' ', array([ 1., 0., 0., 0.])), ('RPE5W27', ': ', array([38, 0, 1, 0]), ' ', array(…	1100000000000	0.989949	0.396552	1	1
21	2	67003824	TTTxTTA	G	C	[('RPE5W22', ': ', array([ 0, 0, 19, 41]), ' ', array([ 0. , 0. , 0.31666667, 0.68333333]), ' ', array([ 0., 0., 1., 1.])), ('RPE5W23', ': ', array([ 0, 0, 12, 35]), ' ', array([ 0. , 0. , 0.25531915, 0.74468085]), ' ', array([ 0., 0., 1., 1.])), ('RPE5W24', ': ', array([ 0, 0, 0, 37]), ' ', array([ 0., 0., 0., 1.]), ' ', array([ 0., 0., 0., 1.])), ('RPE5W27', ': ', array([ 0, 0, 0, 36]), ' ', ar…	1100000000000	0.992476	0.316667	0.998357	1
22	2	71046488	ACTxTTG	G	A	[('RPE5W22', ': ', array([ 9, 0, 1, 34]), ' ', array([ 0.20454545, 0. , 0.02272727, 0.77272727]), ' ', array([ 1., 0., 0., 1.])), ('RPE5W23', ': ', array([12, 0, 0, 19]), ' ', array([ 0.38709677, 0. , 0. , 0.61290323]), ' ', array([ 1., 0., 0., 1.])), ('RPE5W24', ': ', array([ 0, 0, 0, 42]), ' ', array([ 0., 0., 0., 1.]), ' ', array([ 0., 0., 0., 1.])), ('RPE5W27', ': ', array([ 0, 0, 0, 32]), ' …	1100000000000	1	0.215176	0.999981	1
23	2	125000854	TCTxTCC	T	C	[('RPE5W22', ': ', array([ 0, 35, 27, 0]), ' ', array([ 0. , 0.56451613, 0.43548387, 0. ]), ' ', array([ 0., 1., 1., 0.])), ('RPE5W23', ': ', array([ 0, 27, 8, 0]), ' ', array([ 0. , 0.77142857, 0.22857143, 0. ]), ' ', array([ 0., 1., 1., 0.])), ('RPE5W24', ': ', array([ 0, 25, 0, 0]), ' ', array([ 0., 1., 0., 0.]), ' ', array([ 0., 1., 0., 0.])), ('RPE5W27', ': ', array([ 0, 32, 0, 0]), ' ', arr…	1100000000000	0.997674	0.429863	1	1
24	2	164097518	TCCxCTG	A	G	[('RPE5W22', ': ', array([22, 0, 0, 12]), ' ', array([ 0.64705882, 0. , 0. , 0.35294118]), ' ', array([ 1., 0., 0., 1.])), ('RPE5W23', ': ', array([18, 0, 0, 8]), ' ', array([ 0.69230769, 0. , 0. , 0.30769231]), ' ', array([ 1., 0., 0., 1.])), ('RPE5W24', ': ', array([34, 0, 0, 0]), ' ', array([ 1., 0., 0., 0.]), ' ', array([ 1., 0., 0., 0.])), ('RPE5W27', ': ', array([47, 0, 0, 0]), ' ', array([…	1100000000000	0.99697	0.311606	1	1
25	3	556829	ACAxTTG	C	G	[('RPE5W22', ': ', array([ 0, 0, 45, 21]), ' ', array([ 0. , 0. , 0.68181818, 0.31818182]), ' ', array([ 0., 0., 1., 1.])), ('RPE5W23', ': ', array([ 0, 0, 31, 17]), ' ', array([ 0. , 0. , 0.64583333, 0.35416667]), ' ', array([ 0., 0., 1., 1.])), ('RPE5W24', ': ', array([ 0, 0, 41, 0]), ' ', array([ 0., 0., 1., 0.]), ' ', array([ 0., 0., 1., 0.])), ('RPE5W27', ': ', array([ 0, 0, 30, 0]), ' ', ar…	1100000000000	0.997368	0.334767	0.999997	1
26	3	563934	CTTxAAC	G	C	[('RPE5W22', ': ', array([ 1, 0, 16, 34]), ' ', array([ 0.01960784, 0. , 0.31372549, 0.66666667]), ' ', array([ 0., 0., 1., 1.])), ('RPE5W23', ': ', array([ 0, 0, 11, 21]), ' ', array([ 0. , 0. , 0.34375, 0.65625]), ' ', array([ 0., 0., 1., 1.])), ('RPE5W24', ': ', array([ 0, 0, 0, 45]), ' ', array([ 0., 0., 0., 1.]), ' ', array([ 0., 0., 0., 1.])), ('RPE5W27', ': ', array([ 0, 0, 0, 37]), ' ', a…	1100000000000	0.99697	0.329277	0.999997	1
27	3	10721117	GGTxTGT	C	A	[('RPE5W22', ': ', array([17, 0, 29, 0]), ' ', array([ 0.36956522, 0. , 0.63043478, 0. ]), ' ', array([ 1., 0., 1., 0.])), ('RPE5W23', ': ', array([ 5, 0, 27, 0]), ' ', array([ 0.15625, 0. , 0.84375, 0. ]), ' ', array([ 0., 0., 1., 0.])), ('RPE5W24', ': ', array([ 1, 0, 38, 0]), ' ', array([ 0.02564103, 0. , 0.97435897, 0. ]), ' ', array([ 0., 0., 1., 0.])), ('RPE5W27', ': ', array([ 0, 0, 34, 0]…	1100000000000	0.997436	0.295894	0.99985	1
28	3	22666202	TTTxTTT	C	A	[('RPE5W22', ': ', array([19, 0, 32, 0]), ' ', array([ 0.37254902, 0. , 0.62745098, 0. ]), ' ', array([ 1., 0., 1., 0.])), ('RPE5W23', ': ', array([12, 0, 25, 0]), ' ', array([ 0.32432432, 0. , 0.67567568, 0. ]), ' ', array([ 1., 0., 1., 0.])), ('RPE5W24', ': ', array([ 0, 0, 38, 0]), ' ', array([ 0., 0., 1., 0.]), ' ', array([ 0., 0., 1., 0.])), ('RPE5W27', ': ', array([ 0, 0, 32, 0]), ' ', arra…	1100000000000	0.997619	0.314846	1	1
29	3	84736351	AAAxAAT	T	G	[('RPE5W22', ': ', array([ 3, 44, 0, 19]), ' ', array([ 0.04545455, 0.66666667, 0. , 0.28787879]), ' ', array([ 0., 1., 0., 1.])), ('RPE5W23', ': ', array([ 0, 34, 0, 10]), ' ', array([ 0. , 0.77272727, 0. , 0.22727273]), ' ', array([ 0., 1., 0., 1.])), ('RPE5W24', ': ', array([ 0, 30, 0, 0]), ' ', array([ 0., 1., 0., 0.]), ' ', array([ 0., 1., 0., 0.])), ('RPE5W27', ': ', array([ 0, 29, 0, 0]), …	1100000000000	0.989947	0.295455	0.999294	1
30	3	144412475	CTGxCCC	C	A	[('RPE5W22', ': ', array([14, 0, 39, 0]), ' ', array([ 0.26415094, 0. , 0.73584906, 0. ]), ' ', array([ 1., 0., 1., 0.])), ('RPE5W23', ': ', array([15, 0, 31, 0]), ' ', array([ 0.32608696, 0. , 0.67391304, 0. ]), ' ', array([ 1., 0., 1., 0.])), ('RPE5W24', ': ', array([ 1, 0, 45, 0]), ' ', array([ 0.02173913, 0. , 0.97826087, 0. ]), ' ', array([ 0., 0., 1., 0.])), ('RPE5W27', ': ', array([ 0, 0, …	1100000000000	0.997826	0.309495	0.999999	1
31	4	28010198	AGTxCTT	G	T	[('RPE5W22', ': ', array([ 0, 16, 0, 34]), ' ', array([ 0. , 0.32, 0. , 0.68]), ' ', array([ 0., 1., 0., 1.])), ('RPE5W23', ': ', array([ 1, 12, 0, 25]), ' ', array([ 0.02631579, 0.31578947, 0. , 0.65789474]), ' ', array([ 0., 1., 0., 1.])), ('RPE5W24', ': ', array([ 0, 0, 0, 45]), ' ', array([ 0., 0., 0., 1.]), ' ', array([ 0., 0., 0., 1.])), ('RPE5W27', ': ', array([ 0, 0, 1, 40]), ' ', array([…	1100000000000	0.995185	0.32	0.999965	1
32	4	44680525	TCAxAGG	C	T	[('RPE5W22', ': ', array([ 0, 21, 41, 0]), ' ', array([ 0. , 0.33870968, 0.66129032, 0. ]), ' ', array([ 0., 1., 1., 0.])), ('RPE5W23', ': ', array([ 0, 13, 29, 0]), ' ', array([ 0. , 0.30952381, 0.69047619, 0. ]), ' ', array([ 0., 1., 1., 0.])), ('RPE5W24', ': ', array([ 0, 0, 49, 0]), ' ', array([ 0., 0., 1., 0.]), ' ', array([ 0., 0., 1., 0.])), ('RPE5W27', ': ', array([ 0, 0, 34, 0]), ' ', ar…	1100000000000	0.9946	0.32087	0.999999	1
33	4	46010682	TAAxAAA	C	G	[('RPE5W22', ': ', array([ 0, 1, 30, 23]), ' ', array([ 0. , 0.01851852, 0.55555556, 0.42592593]), ' ', array([ 0., 0., 1., 1.])), ('RPE5W23', ': ', array([ 0, 0, 23, 18]), ' ', array([ 0. , 0. , 0.56097561, 0.43902439]), ' ', array([ 0., 0., 1., 1.])), ('RPE5W24', ': ', array([ 0, 1, 64, 0]), ' ', array([ 0. , 0.01538462, 0.98461538, 0. ]), ' ', array([ 0., 0., 1., 0.])), ('RPE5W27', ': ', array…	1100000000000	0.982552	0.334585	1	1
34	4	49586523	AAGxTGG	A	G	[('RPE5W22', ': ', array([16, 1, 0, 17]), ' ', array([ 0.47058824, 0.02941176, 0. , 0.5 ]), ' ', array([ 1., 0., 0., 1.])), ('RPE5W23', ': ', array([ 9, 0, 0, 13]), ' ', array([ 0.40909091, 0. , 0. , 0.59090909]), ' ', array([ 1., 0., 0., 1.])), ('RPE5W24', ': ', array([24, 0, 0, 0]), ' ', array([ 1., 0., 0., 0.]), ' ', array([ 1., 0., 0., 0.])), ('RPE5W27', ': ', array([34, 0, 0, 0]), ' ', array…	1100000000000	0.985883	0.434211	0.999813	1
35	4	54133972	GATxACA	C	T	[('RPE5W22', ': ', array([ 2, 21, 38, 0]), ' ', array([ 0.03278689, 0.3442623 , 0.62295082, 0. ]), ' ', array([ 0., 1., 1., 0.])), ('RPE5W23', ': ', array([ 0, 9, 25, 0]), ' ', array([ 0. , 0.26470588, 0.73529412, 0. ]), ' ', array([ 0., 1., 1., 0.])), ('RPE5W24', ': ', array([ 0, 0, 45, 0]), ' ', array([ 0., 0., 1., 0.]), ' ', array([ 0., 0., 1., 0.])), ('RPE5W27', ': ', array([ 0, 0, 39, 0]), '…	1100000000000	1	0.333896	0.999973	1
36	4	69021617	TGTxTCT	G	T	[('RPE5W22', ': ', array([ 0, 21, 0, 29]), ' ', array([ 0. , 0.42, 0. , 0.58]), ' ', array([ 0., 1., 0., 1.])), ('RPE5W23', ': ', array([ 1, 7, 0, 25]), ' ', array([ 0.03030303, 0.21212121, 0. , 0.75757576]), ' ', array([ 0., 1., 0., 1.])), ('RPE5W24', ': ', array([ 0, 0, 0, 45]), ' ', array([ 0., 0., 0., 1.]), ' ', array([ 0., 0., 0., 1.])), ('RPE5W27', ': ', array([ 0, 0, 0, 48]), ' ', array([ …	1100000000000	0.995326	0.33	0.999999	1
37	4	69787371	GCAxATC	A	T	[('RPE5W22', ': ', array([36, 18, 0, 0]), ' ', array([ 0.66666667, 0.33333333, 0. , 0. ]), ' ', array([ 1., 1., 0., 0.])), ('RPE5W23', ': ', array([35, 15, 0, 0]), ' ', array([ 0.7, 0.3, 0. , 0. ]), ' ', array([ 1., 1., 0., 0.])), ('RPE5W24', ': ', array([38, 0, 0, 0]), ' ', array([ 1., 0., 0., 0.]), ' ', array([ 1., 0., 0., 0.])), ('RPE5W27', ': ', array([50, 0, 0, 0]), ' ', array([ 1., 0., 0., …	1100000000000	1	0.327957	1	1
38	4	92585095	CCTxGGC	G	C	[('RPE5W22', ': ', array([ 0, 0, 18, 40]), ' ', array([ 0. , 0. , 0.31034483, 0.68965517]), ' ', array([ 0., 0., 1., 1.])), ('RPE5W23', ': ', array([ 0, 0, 9, 26]), ' ', array([ 0. , 0. , 0.25714286, 0.74285714]), ' ', array([ 0., 0., 1., 1.])), ('RPE5W24', ': ', array([ 0, 0, 0, 36]), ' ', array([ 0., 0., 0., 1.]), ' ', array([ 0., 0., 0., 1.])), ('RPE5W27', ': ', array([ 0, 0, 0, 41]), ' ', arr…	1100000000000	0.975877	0.295172	0.999271	1
39	4	100289842	AATxATT	C	A	[('RPE5W22', ': ', array([15, 0, 28, 0]), ' ', array([ 0.34883721, 0. , 0.65116279, 0. ]), ' ', array([ 1., 0., 1., 0.])), ('RPE5W23', ': ', array([13, 0, 18, 0]), ' ', array([ 0.41935484, 0. , 0.58064516, 0. ]), ' ', array([ 1., 0., 1., 0.])), ('RPE5W24', ': ', array([ 0, 0, 39, 0]), ' ', array([ 0., 0., 1., 0.]), ' ', array([ 0., 0., 1., 0.])), ('RPE5W27', ': ', array([ 0, 0, 40, 0]), ' ', arra…	1100000000000	1	0.293466	0.999999	1
40	4	111288840	GGTxTAT	A	T	[('RPE5W22', ': ', array([28, 17, 0, 0]), ' ', array([ 0.62222222, 0.37777778, 0. , 0. ]), ' ', array([ 1., 1., 0., 0.])), ('RPE5W23', ': ', array([18, 12, 0, 0]), ' ', array([ 0.6, 0.4, 0. , 0. ]), ' ', array([ 1., 1., 0., 0.])), ('RPE5W24', ': ', array([35, 0, 1, 0]), ' ', array([ 0.97222222, 0. , 0.02777778, 0. ]), ' ', array([ 1., 0., 0., 0.])), ('RPE5W27', ': ', array([30, 1, 0, 0]), ' ', ar…	1100000000000	0.98611	0.325253	0.999997	1
41	4	138924448	TTGxAAA	G	T	[('RPE5W22', ': ', array([ 0, 16, 0, 42]), ' ', array([ 0. , 0.27586207, 0. , 0.72413793]), ' ', array([ 0., 1., 0., 1.])), ('RPE5W23', ': ', array([ 0, 15, 0, 27]), ' ', array([ 0. , 0.35714286, 0. , 0.64285714]), ' ', array([ 0., 1., 0., 1.])), ('RPE5W24', ': ', array([ 0, 0, 0, 28]), ' ', array([ 0., 0., 0., 1.]), ' ', array([ 0., 0., 0., 1.])), ('RPE5W27', ': ', array([ 0, 0, 0, 43]), ' ', ar…	1100000000000	0.997727	0.352217	0.999999	1
42	4	156373603	GCCxTTA	A	G	[('RPE5W22', ': ', array([44, 0, 0, 19]), ' ', array([ 0.6984127, 0. , 0. , 0.3015873]), ' ', array([ 1., 0., 0., 1.])), ('RPE5W23', ': ', array([26, 0, 0, 5]), ' ', array([ 0.83870968, 0. , 0. , 0.16129032]), ' ', array([ 1., 0., 0., 0.])), ('RPE5W24', ': ', array([31, 0, 0, 0]), ' ', array([ 1., 0., 0., 0.]), ' ', array([ 1., 0., 0., 0.])), ('RPE5W27', ': ', array([24, 0, 0, 0]), ' ', array([ 1…	1100000000000	0.988977	0.392729	0.994505	1
43	4	160014186	GTTxGAC	G	A	[('RPE5W22', ': ', array([23, 0, 0, 30]), ' ', array([ 0.43396226, 0. , 0. , 0.56603774]), ' ', array([ 1., 0., 0., 1.])), ('RPE5W23', ': ', array([12, 0, 0, 29]), ' ', array([ 0.29268293, 0. , 0. , 0.70731707]), ' ', array([ 1., 0., 0., 1.])), ('RPE5W24', ': ', array([ 0, 0, 0, 37]), ' ', array([ 0., 0., 0., 1.]), ' ', array([ 0., 0., 0., 1.])), ('RPE5W27', ': ', array([ 0, 1, 0, 43]), ' ', arra…	1100000000000	0.975349	0.433962	0.999999	1
44	4	170909856	GTAxCAT	G	C	[('RPE5W22', ': ', array([ 0, 0, 16, 27]), ' ', array([ 0. , 0. , 0.37209302, 0.62790698]), ' ', array([ 0., 0., 1., 1.])), ('RPE5W23', ': ', array([ 0, 0, 12, 29]), ' ', array([ 0. , 0. , 0.29268293, 0.70731707]), ' ', array([ 0., 0., 1., 1.])), ('RPE5W24', ': ', array([ 0, 0, 0, 35]), ' ', array([ 0., 0., 0., 1.]), ' ', array([ 0., 0., 0., 1.])), ('RPE5W27', ': ', array([ 0, 0, 0, 41]), ' ', ar…	1100000000000	0.992142	0.367865	0.999999	1
45	4	179033287	CTGxATA	G	T	[('RPE5W22', ': ', array([ 0, 16, 0, 33]), ' ', array([ 0. , 0.32653061, 0. , 0.67346939]), ' ', array([ 0., 1., 0., 1.])), ('RPE5W23', ': ', array([ 1, 18, 0, 18]), ' ', array([ 0.02702703, 0.48648649, 0. , 0.48648649]), ' ', array([ 0., 1., 0., 1.])), ('RPE5W24', ': ', array([ 0, 0, 0, 44]), ' ', array([ 0., 0., 0., 1.]), ' ', array([ 0., 0., 0., 1.])), ('RPE5W27', ': ', array([ 1, 0, 0, 48]), …	1100000000000	0.997959	0.398559	1	1
46	4	181230332	GCTxAAC	C	A	[('RPE5W22', ': ', array([18, 0, 50, 0]), ' ', array([ 0.26470588, 0. , 0.73529412, 0. ]), ' ', array([ 1., 0., 1., 0.])), ('RPE5W23', ': ', array([13, 0, 19, 0]), ' ', array([ 0.40625, 0. , 0.59375, 0. ]), ' ', array([ 1., 0., 1., 0.])), ('RPE5W24', ': ', array([ 1, 0, 41, 0]), ' ', array([ 0.02380952, 0. , 0.97619048, 0. ]), ' ', array([ 0., 0., 1., 0.])), ('RPE5W27', ': ', array([ 0, 0, 32, 0]…	1100000000000	0.993809	0.310924	1	1
47	4	183990998	CTGxCAG	G	T	[('RPE5W22', ': ', array([ 0, 22, 0, 42]), ' ', array([ 0. , 0.34375, 0. , 0.65625]), ' ', array([ 0., 1., 0., 1.])), ('RPE5W23', ': ', array([ 0, 10, 0, 33]), ' ', array([ 0. , 0.23255814, 0. , 0.76744186]), ' ', array([ 0., 1., 0., 1.])), ('RPE5W24', ': ', array([ 0, 0, 0, 29]), ' ', array([ 0., 0., 0., 1.]), ' ', array([ 0., 0., 0., 1.])), ('RPE5W27', ': ', array([ 0, 0, 0, 41]), ' ', array([ …	1100000000000	0.986887	0.331875	0.999948	1
48	4	189489169	TTTxTTT	A	C	[('RPE5W22', ': ', array([34, 0, 20, 1]), ' ', array([ 0.61818182, 0. , 0.36363636, 0.01818182]), ' ', array([ 1., 0., 1., 0.])), ('RPE5W23', ': ', array([29, 0, 15, 0]), ' ', array([ 0.65909091, 0. , 0.34090909, 0. ]), ' ', array([ 1., 0., 1., 0.])), ('RPE5W24', ': ', array([53, 1, 0, 0]), ' ', array([ 0.98148148, 0.01851852, 0. , 0. ]), ' ', array([ 1., 0., 0., 0.])), ('RPE5W27', ': ', array([3…	1100000000000	0.965158	0.306818	0.999952	1
49	5	7866316	TAAxAGA	A	G	[('RPE5W22', ': ', array([40, 0, 1, 16]), ' ', array([ 0.70175439, 0. , 0.01754386, 0.28070175]), ' ', array([ 1., 0., 0., 1.])), ('RPE5W23', ': ', array([35, 1, 1, 14]), ' ', array([ 0.68627451, 0.01960784, 0.01960784, 0.2745098 ]), ' ', array([ 1., 0., 0., 1.])), ('RPE5W24', ': ', array([40, 0, 0, 0]), ' ', array([ 1., 0., 0., 0.]), ' ', array([ 1., 0., 0., 0.])), ('RPE5W27', ': ', array([55, 0…	1100000000000	0.997826	0.307018	1	1
50	5	18666308	TTCxAGG	C	A	[('RPE5W22', ': ', array([20, 0, 41, 0]), ' ', array([ 0.32786885, 0. , 0.67213115, 0. ]), ' ', array([ 1., 0., 1., 0.])), ('RPE5W23', ': ', array([14, 0, 36, 0]), ' ', array([ 0.28, 0. , 0.72, 0. ]), ' ', array([ 1., 0., 1., 0.])), ('RPE5W24', ': ', array([ 0, 0, 43, 0]), ' ', array([ 0., 0., 1., 0.]), ' ', array([ 0., 0., 1., 0.])), ('RPE5W27', ': ', array([ 0, 0, 46, 0]), ' ', array([ 0., 0., …	1100000000000	0.994738	0.327869	1	1
51	5	28116285	CTTxTGA	C	T	[('RPE5W22', ': ', array([ 0, 18, 52, 0]), ' ', array([ 0. , 0.25714286, 0.74285714, 0. ]), ' ', array([ 0., 1., 1., 0.])), ('RPE5W23', ': ', array([ 0, 12, 42, 0]), ' ', array([ 0. , 0.22222222, 0.77777778, 0. ]), ' ', array([ 0., 1., 1., 0.])), ('RPE5W24', ': ', array([ 0, 0, 53, 0]), ' ', array([ 0., 0., 1., 0.]), ' ', array([ 0., 0., 1., 0.])), ('RPE5W27', ': ', array([ 0, 0, 44, 0]), ' ', ar…	1100000000000	1	0.257143	0.999907	1
52	5	43774336	TTCxTTT	T	G	[('RPE5W22', ': ', array([ 0, 52, 0, 15]), ' ', array([ 0. , 0.7761194, 0. , 0.2238806]), ' ', array([ 0., 1., 0., 1.])), ('RPE5W23', ': ', array([ 0, 37, 0, 13]), ' ', array([ 0. , 0.74, 0. , 0.26]), ' ', array([ 0., 1., 0., 1.])), ('RPE5W24', ': ', array([ 0, 52, 0, 1]), ' ', array([ 0. , 0.98113208, 0. , 0.01886792]), ' ', array([ 0., 1., 0., 0.])), ('RPE5W27', ': ', array([ 0, 70, 0, 0]), ' '…	1100000000000	0.98774	0.260378	0.999998	1
53	5	126922543	AAAxCTT	C	A	[('RPE5W22', ': ', array([13, 0, 43, 0]), ' ', array([ 0.23214286, 0. , 0.76785714, 0. ]), ' ', array([ 1., 0., 1., 0.])), ('RPE5W23', ': ', array([11, 1, 30, 0]), ' ', array([ 0.26190476, 0.02380952, 0.71428571, 0. ]), ' ', array([ 1., 0., 1., 0.])), ('RPE5W24', ': ', array([ 0, 0, 55, 0]), ' ', array([ 0., 0., 1., 0.]), ' ', array([ 0., 0., 1., 0.])), ('RPE5W27', ': ', array([ 0, 0, 46, 0]), ' …	1100000000000	0.997826	0.174895	0.998937	1
54	5	131556602	CTGxAGA	G	A	[('RPE5W22', ': ', array([15, 0, 0, 54]), ' ', array([ 0.2173913, 0. , 0. , 0.7826087]), ' ', array([ 1., 0., 0., 1.])), ('RPE5W23', ': ', array([ 8, 0, 0, 44]), ' ', array([ 0.15384615, 0. , 0. , 0.84615385]), ' ', array([ 0., 0., 0., 1.])), ('RPE5W24', ': ', array([ 0, 0, 0, 47]), ' ', array([ 0., 0., 0., 1.]), ' ', array([ 0., 0., 0., 1.])), ('RPE5W27', ': ', array([ 0, 0, 1, 56]), ' ', array(…	1100000000000	0.991594	0.215079	0.999859	1
55	5	160280454	AAGxCAA	C	G	[('RPE5W22', ': ', array([ 0, 0, 51, 16]), ' ', array([ 0. , 0. , 0.76119403, 0.23880597]), ' ', array([ 0., 0., 1., 1.])), ('RPE5W23', ': ', array([ 1, 0, 33, 11]), ' ', array([ 0.02222222, 0. , 0.73333333, 0.24444444]), ' ', array([ 0., 0., 1., 1.])), ('RPE5W24', ': ', array([ 0, 0, 52, 0]), ' ', array([ 0., 0., 1., 0.]), ' ', array([ 0., 0., 1., 0.])), ('RPE5W27', ': ', array([ 2, 0, 51, 0]), …	1100000000000	0.993954	0.282194	1	1
56	6	123620103	ACAxACG	A	G	[('RPE5W22', ': ', array([29, 0, 0, 20]), ' ', array([ 0.58, 0. , 0. , 0.4 ]), ' ', array([ 1., 0., 0., 1.])), ('RPE5W23', ': ', array([24, 0, 0, 19]), ' ', array([ 0.55813953, 0. , 0. , 0.44186047]), ' ', array([ 1., 0., 0., 1.])), ('RPE5W24', ': ', array([52, 0, 1, 0]), ' ', array([ 0.98113208, 0. , 0.01886792, 0. ]), ' ', array([ 1., 0., 0., 0.])), ('RPE5W27', ': ', array([38, 0, 0, 0]), ' ', …	1100000000000	0.998285	0.408163	1	1
57	6	126861285	TTAxACA	G	T	[('RPE5W22', ': ', array([ 1, 17, 0, 41]), ' ', array([ 0.01694915, 0.28813559, 0. , 0.69491525]), ' ', array([ 0., 1., 0., 1.])), ('RPE5W23', ': ', array([ 1, 10, 0, 19]), ' ', array([ 0.03333333, 0.33333333, 0. , 0.63333333]), ' ', array([ 0., 1., 0., 1.])), ('RPE5W24', ': ', array([ 0, 3, 0, 29]), ' ', array([ 0. , 0.09375, 0. , 0.90625]), ' ', array([ 0., 0., 0., 1.])), ('RPE5W27', ': ', arra…	1100000000000	0.978384	0.424068	0.99998	1
58	7	15152433	CCCxAAT	A	T	[('RPE5W22', ': ', array([46, 16, 0, 1]), ' ', array([ 0.73015873, 0.25396825, 0. , 0.01587302]), ' ', array([ 1., 1., 0., 0.])), ('RPE5W23', ': ', array([42, 13, 0, 0]), ' ', array([ 0.76363636, 0.23636364, 0. , 0. ]), ' ', array([ 1., 1., 0., 0.])), ('RPE5W24', ': ', array([40, 0, 1, 0]), ' ', array([ 0.97560976, 0. , 0.02439024, 0. ]), ' ', array([ 1., 0., 0., 0.])), ('RPE5W27', ': ', array([4…	1100000000000	0.985784	0.260317	0.999959	1
59	7	39978925	AAAxTTA	A	T	[('RPE5W22', ': ', array([49, 18, 0, 1]), ' ', array([ 0.72058824, 0.26470588, 0. , 0.01470588]), ' ', array([ 1., 1., 0., 0.])), ('RPE5W23', ': ', array([35, 11, 1, 0]), ' ', array([ 0.74468085, 0.23404255, 0.0212766 , 0. ]), ' ', array([ 1., 1., 0., 0.])), ('RPE5W24', ': ', array([54, 0, 0, 0]), ' ', array([ 1., 0., 0., 0.]), ' ', array([ 1., 0., 0., 0.])), ('RPE5W27', ': ', array([56, 0, 0, 0]…	1100000000000	0.997674	0.246388	1	1
60	7	45932319	ACTxTAC	G	T	[('RPE5W22', ': ', array([ 0, 12, 2, 52]), ' ', array([ 0. , 0.18181818, 0.03030303, 0.78787879]), ' ', array([ 0., 0., 0., 1.])), ('RPE5W23', ': ', array([ 1, 11, 0, 29]), ' ', array([ 0.02439024, 0.26829268, 0. , 0.70731707]), ' ', array([ 0., 1., 0., 1.])), ('RPE5W24', ': ', array([ 0, 0, 0, 57]), ' ', array([ 0., 0., 0., 1.]), ' ', array([ 0., 0., 0., 1.])), ('RPE5W27', ': ', array([ 0, 0, 0,…	1100000000000	0.99562	0.181818	0.99996	1
61	7	85545743	AACxGAA	A	C	[('RPE5W22', ': ', array([47, 0, 16, 0]), ' ', array([ 0.74603175, 0. , 0.25396825, 0. ]), ' ', array([ 1., 0., 1., 0.])), ('RPE5W23', ': ', array([32, 0, 9, 0]), ' ', array([ 0.7804878, 0. , 0.2195122, 0. ]), ' ', array([ 1., 0., 1., 0.])), ('RPE5W24', ': ', array([49, 0, 0, 0]), ' ', array([ 1., 0., 0., 0.]), ' ', array([ 1., 0., 0., 0.])), ('RPE5W27', ': ', array([37, 0, 0, 1]), ' ', array([ 0…	1100000000000	0.995215	0.253968	0.999992	1
62	7	88921615	GTAxAAA	G	T	[('RPE5W22', ': ', array([ 1, 22, 0, 56]), ' ', array([ 0.01265823, 0.27848101, 0. , 0.70886076]), ' ', array([ 0., 1., 0., 1.])), ('RPE5W23', ': ', array([ 0, 15, 0, 37]), ' ', array([ 0. , 0.28846154, 0. , 0.71153846]), ' ', array([ 0., 1., 0., 1.])), ('RPE5W24', ': ', array([ 0, 0, 0, 55]), ' ', array([ 0., 0., 0., 1.]), ' ', array([ 0., 0., 0., 1.])), ('RPE5W27', ': ', array([ 0, 0, 0, 58]), …	1100000000000	0.99241	0.345762	1	1
63	7	104517176	CAGxGAT	G	T	[('RPE5W22', ': ', array([ 0, 20, 0, 54]), ' ', array([ 0. , 0.27027027, 0. , 0.72972973]), ' ', array([ 0., 1., 0., 1.])), ('RPE5W23', ': ', array([ 1, 8, 0, 46]), ' ', array([ 0.01818182, 0.14545455, 0. , 0.83636364]), ' ', array([ 0., 0., 0., 1.])), ('RPE5W24', ': ', array([ 0, 0, 0, 49]), ' ', array([ 0., 0., 0., 1.]), ' ', array([ 0., 0., 0., 1.])), ('RPE5W27', ': ', array([ 0, 0, 0, 54]), '…	1100000000000	0.987947	0.255506	0.994463	1
64	7	105115200	CAGxCTG	C	G	[('RPE5W22', ': ', array([ 0, 0, 59, 25]), ' ', array([ 0. , 0. , 0.70238095, 0.29761905]), ' ', array([ 0., 0., 1., 1.])), ('RPE5W23', ': ', array([ 0, 0, 47, 20]), ' ', array([ 0. , 0. , 0.70149254, 0.29850746]), ' ', array([ 0., 0., 1., 1.])), ('RPE5W24', ': ', array([ 0, 0, 74, 0]), ' ', array([ 0., 0., 1., 0.]), ' ', array([ 0., 0., 1., 0.])), ('RPE5W27', ': ', array([ 1, 0, 65, 0]), ' ', ar…	1100000000000	0.988018	0.297619	1	1
65	7	123525188	ATTxGTA	T	G	[('RPE5W22', ': ', array([ 2, 54, 0, 14]), ' ', array([ 0.02857143, 0.77142857, 0. , 0.2 ]), ' ', array([ 0., 1., 0., 0.])), ('RPE5W23', ': ', array([ 1, 32, 0, 6]), ' ', array([ 0.02564103, 0.82051282, 0. , 0.15384615]), ' ', array([ 0., 1., 0., 0.])), ('RPE5W24', ': ', array([ 0, 51, 0, 0]), ' ', array([ 0., 1., 0., 0.]), ' ', array([ 0., 1., 0., 0.])), ('RPE5W27', ': ', array([ 0, 61, 0, 0]), …	1100000000000	0.990673	0.235593	0.999999	1
66	7	135931542	AGTxACA	A	G	[('RPE5W22', ': ', array([58, 0, 0, 17]), ' ', array([ 0.77333333, 0. , 0. , 0.22666667]), ' ', array([ 1., 0., 0., 1.])), ('RPE5W23', ': ', array([23, 0, 0, 15]), ' ', array([ 0.60526316, 0. , 0. , 0.39473684]), ' ', array([ 1., 0., 0., 1.])), ('RPE5W24', ': ', array([41, 0, 0, 0]), ' ', array([ 1., 0., 0., 0.]), ' ', array([ 1., 0., 0., 0.])), ('RPE5W27', ': ', array([35, 0, 0, 0]), ' ', array(…	1100000000000	0.986712	0.275495	0.999987	1
67	8	20093758	GCTxAAG	C	T	[('RPE5W22', ': ', array([ 0, 18, 37, 2]), ' ', array([ 0. , 0.31578947, 0.64912281, 0.03508772]), ' ', array([ 0., 1., 1., 0.])), ('RPE5W23', ': ', array([ 0, 6, 18, 0]), ' ', array([ 0. , 0.25, 0.75, 0. ]), ' ', array([ 0., 1., 1., 0.])), ('RPE5W24', ': ', array([ 0, 0, 30, 0]), ' ', array([ 0., 0., 1., 0.]), ' ', array([ 0., 0., 1., 0.])), ('RPE5W27', ': ', array([ 0, 0, 43, 0]), ' ', array([ …	1100000000000	0.987907	0.300752	0.999984	1
68	8	49082481	ACAxTTT	G	T	[('RPE5W22', ': ', array([ 0, 17, 0, 36]), ' ', array([ 0. , 0.32075472, 0. , 0.67924528]), ' ', array([ 0., 1., 0., 1.])), ('RPE5W23', ': ', array([ 0, 17, 0, 30]), ' ', array([ 0. , 0.36170213, 0. , 0.63829787]), ' ', array([ 0., 1., 0., 1.])), ('RPE5W24', ': ', array([ 0, 0, 0, 46]), ' ', array([ 0., 0., 0., 1.]), ' ', array([ 0., 0., 0., 1.])), ('RPE5W27', ': ', array([ 0, 1, 0, 39]), ' ', ar…	1100000000000	0.995335	0.320755	1	1
69	8	65127148	CTAxCAA	C	T	[('RPE5W22', ': ', array([ 0, 15, 25, 0]), ' ', array([ 0. , 0.375, 0.625, 0. ]), ' ', array([ 0., 1., 1., 0.])), ('RPE5W23', ': ', array([ 0, 11, 28, 0]), ' ', array([ 0. , 0.28205128, 0.71794872, 0. ]), ' ', array([ 0., 1., 1., 0.])), ('RPE5W24', ': ', array([ 0, 0, 40, 0]), ' ', array([ 0., 0., 1., 0.]), ' ', array([ 0., 0., 1., 0.])), ('RPE5W27', ': ', array([ 1, 0, 28, 0]), ' ', array([ 0.03…	1100000000000	0.986966	0.361413	0.999999	1
70	8	75393943	ATTxGCT	G	T	[('RPE5W22', ': ', array([ 0, 17, 0, 37]), ' ', array([ 0. , 0.31481481, 0. , 0.68518519]), ' ', array([ 0., 1., 0., 1.])), ('RPE5W23', ': ', array([ 0, 7, 0, 23]), ' ', array([ 0. , 0.23333333, 0. , 0.76666667]), ' ', array([ 0., 1., 0., 1.])), ('RPE5W24', ': ', array([ 0, 0, 0, 41]), ' ', array([ 0., 0., 0., 1.]), ' ', array([ 0., 0., 0., 1.])), ('RPE5W27', ': ', array([ 0, 0, 0, 33]), ' ', arr…	1100000000000	0.997475	0.314815	0.999865	1
71	8	96500279	TTTxGCA	T	C	[('RPE5W22', ': ', array([ 0, 36, 19, 0]), ' ', array([ 0. , 0.65454545, 0.34545455, 0. ]), ' ', array([ 0., 1., 1., 0.])), ('RPE5W23', ': ', array([ 0, 28, 7, 0]), ' ', array([ 0. , 0.8, 0.2, 0. ]), ' ', array([ 0., 1., 0., 0.])), ('RPE5W24', ': ', array([ 0, 34, 0, 0]), ' ', array([ 0., 1., 0., 0.]), ' ', array([ 0., 1., 0., 0.])), ('RPE5W27', ': ', array([ 0, 36, 0, 0]), ' ', array([ 0., 1., 0…	1100000000000	0.995652	0.32389	0.999185	1
72	9	110782525	AGGxCAT	T	C	[('RPE5W22', ': ', array([ 0, 25, 10, 0]), ' ', array([ 0. , 0.71428571, 0.28571429, 0. ]), ' ', array([ 0., 1., 1., 0.])), ('RPE5W23', ': ', array([ 0, 32, 12, 1]), ' ', array([ 0. , 0.71111111, 0.26666667, 0.02222222]), ' ', array([ 0., 1., 1., 0.])), ('RPE5W24', ': ', array([ 1, 39, 0, 0]), ' ', array([ 0.025, 0.975, 0. , 0. ]), ' ', array([ 0., 1., 0., 0.])), ('RPE5W27', ': ', array([ 0, 38, …	1100000000000	0.984221	0.285714	0.999662	1
73	10	49966949	TGTxTTT	C	A	[('RPE5W22', ': ', array([16, 0, 14, 0]), ' ', array([ 0.53333333, 0. , 0.46666667, 0. ]), ' ', array([ 1., 0., 1., 0.])), ('RPE5W23', ': ', array([14, 0, 11, 0]), ' ', array([ 0.56, 0. , 0.44, 0. ]), ' ', array([ 1., 0., 1., 0.])), ('RPE5W24', ': ', array([ 0, 0, 19, 0]), ' ', array([ 0., 0., 1., 0.]), ' ', array([ 0., 0., 1., 0.])), ('RPE5W27', ': ', array([ 0, 0, 33, 0]), ' ', array([ 0., 0., …	1100000000000	0.98596	0.533333	1	1
74	10	103848429	ATTxTTT	A	T	[('RPE5W22', ': ', array([53, 21, 0, 0]), ' ', array([ 0.71621622, 0.28378378, 0. , 0. ]), ' ', array([ 1., 1., 0., 0.])), ('RPE5W23', ': ', array([39, 19, 1, 0]), ' ', array([ 0.66101695, 0.3220339 , 0.01694915, 0. ]), ' ', array([ 1., 1., 0., 0.])), ('RPE5W24', ': ', array([49, 0, 0, 0]), ' ', array([ 1., 0., 0., 0.]), ' ', array([ 1., 0., 0., 0.])), ('RPE5W27', ': ', array([48, 0, 0, 0]), ' ',…	1100000000000	0.982134	0.279392	1	1
75	10	106987425	GTTxGAT	G	T	[('RPE5W22', ': ', array([ 0, 22, 0, 56]), ' ', array([ 0. , 0.28205128, 0. , 0.71794872]), ' ', array([ 0., 1., 0., 1.])), ('RPE5W23', ': ', array([ 0, 14, 0, 45]), ' ', array([ 0. , 0.23728814, 0. , 0.76271186]), ' ', array([ 0., 1., 0., 1.])), ('RPE5W24', ': ', array([ 1, 0, 0, 48]), ' ', array([ 0.02040816, 0. , 0. , 0.97959184]), ' ', array([ 0., 0., 0., 1.])), ('RPE5W27', ': ', array([ 0, 0…	1100000000000	0.99031	0.236264	0.997035	1
76	10	119977972	TTTxACC	C	T	[('RPE5W22', ': ', array([ 0, 16, 49, 0]), ' ', array([ 0. , 0.24615385, 0.75384615, 0. ]), ' ', array([ 0., 1., 1., 0.])), ('RPE5W23', ': ', array([ 0, 13, 40, 1]), ' ', array([ 0. , 0.24074074, 0.74074074, 0.01851852]), ' ', array([ 0., 1., 1., 0.])), ('RPE5W24', ': ', array([ 0, 0, 40, 0]), ' ', array([ 0., 0., 1., 0.]), ' ', array([ 0., 0., 1., 0.])), ('RPE5W27', ': ', array([ 0, 0, 42, 0]), …	1100000000000	0.995833	0.280972	0.999999	1
77	11	16656655	ATGxACT	G	A	[('RPE5W22', ': ', array([15, 0, 0, 57]), ' ', array([ 0.20833333, 0. , 0. , 0.79166667]), ' ', array([ 1., 0., 0., 1.])), ('RPE5W23', ': ', array([18, 0, 0, 35]), ' ', array([ 0.33962264, 0. , 0. , 0.66037736]), ' ', array([ 1., 0., 0., 1.])), ('RPE5W24', ': ', array([ 0, 1, 0, 47]), ' ', array([ 0. , 0.02083333, 0. , 0.97916667]), ' ', array([ 0., 0., 0., 1.])), ('RPE5W27', ': ', array([ 0, 0, …	1100000000000	0.991702	0.239302	1	1
78	11	38736038	ATTxTTA	A	C	[('RPE5W22', ': ', array([46, 0, 14, 0]), ' ', array([ 0.76666667, 0. , 0.23333333, 0. ]), ' ', array([ 1., 0., 1., 0.])), ('RPE5W23', ': ', array([42, 0, 12, 0]), ' ', array([ 0.77777778, 0. , 0.22222222, 0. ]), ' ', array([ 1., 0., 1., 0.])), ('RPE5W24', ': ', array([63, 0, 0, 0]), ' ', array([ 1., 0., 0., 0.]), ' ', array([ 1., 0., 0., 0.])), ('RPE5W27', ': ', array([44, 0, 0, 0]), ' ', array(…	1100000000000	0.99798	0.233333	0.999989	1
79	11	38848384	ATAxCAG	C	G	[('RPE5W22', ': ', array([ 0, 0, 57, 18]), ' ', array([ 0. , 0. , 0.76, 0.24]), ' ', array([ 0., 0., 1., 1.])), ('RPE5W23', ': ', array([ 0, 1, 37, 13]), ' ', array([ 0. , 0.01960784, 0.7254902 , 0.25490196]), ' ', array([ 0., 0., 1., 1.])), ('RPE5W24', ': ', array([ 0, 0, 63, 0]), ' ', array([ 0., 0., 1., 0.]), ' ', array([ 0., 0., 1., 0.])), ('RPE5W27', ': ', array([ 0, 0, 40, 0]), ' ', array([…	1100000000000	0.99476	0.252075	0.999991	1
80	11	68998040	AGAxAAT	G	T	[('RPE5W22', ': ', array([ 0, 14, 0, 48]), ' ', array([ 0. , 0.22580645, 0. , 0.77419355]), ' ', array([ 0., 1., 0., 1.])), ('RPE5W23', ': ', array([ 0, 6, 0, 27]), ' ', array([ 0. , 0.18181818, 0. , 0.81818182]), ' ', array([ 0., 0., 0., 1.])), ('RPE5W24', ': ', array([ 0, 1, 0, 48]), ' ', array([ 0. , 0.02040816, 0. , 0.97959184]), ' ', array([ 0., 0., 0., 1.])), ('RPE5W27', ': ', array([ 0, 0,…	1100000000000	0.994293	0.270798	0.99999	1
81	11	81342317	CAAxCTA	C	G	[('RPE5W22', ': ', array([ 0, 0, 50, 18]), ' ', array([ 0. , 0. , 0.73529412, 0.26470588]), ' ', array([ 0., 0., 1., 1.])), ('RPE5W23', ': ', array([ 0, 0, 47, 6]), ' ', array([ 0. , 0. , 0.88679245, 0.11320755]), ' ', array([ 0., 0., 1., 0.])), ('RPE5W24', ': ', array([ 0, 0, 48, 0]), ' ', array([ 0., 0., 1., 0.]), ' ', array([ 0., 0., 1., 0.])), ('RPE5W27', ': ', array([ 0, 0, 49, 1]), ' ', arr…	1100000000000	0.993061	0.213434	0.997889	1
82	11	110753515	ATGxTGT	G	T	[('RPE5W22', ': ', array([ 0, 16, 0, 57]), ' ', array([ 0. , 0.21621622, 0. , 0.77027027]), ' ', array([ 0., 1., 0., 1.])), ('RPE5W23', ': ', array([ 0, 20, 0, 34]), ' ', array([ 0. , 0.37037037, 0. , 0.62962963]), ' ', array([ 0., 1., 0., 1.])), ('RPE5W24', ': ', array([ 0, 0, 0, 49]), ' ', array([ 0., 0., 0., 1.]), ' ', array([ 0., 0., 0., 1.])), ('RPE5W27', ': ', array([ 0, 0, 0, 54]), ' ', ar…	1100000000000	0.995992	0.179589	0.999992	1
83	11	112708455	CATxTGT	C	A	[('RPE5W22', ': ', array([21, 0, 47, 0]), ' ', array([ 0.30882353, 0. , 0.69117647, 0. ]), ' ', array([ 1., 0., 1., 0.])), ('RPE5W23', ': ', array([12, 0, 45, 0]), ' ', array([ 0.21052632, 0. , 0.78947368, 0. ]), ' ', array([ 1., 0., 1., 0.])), ('RPE5W24', ': ', array([ 0, 0, 50, 0]), ' ', array([ 0., 0., 1., 0.]), ' ', array([ 0., 0., 1., 0.])), ('RPE5W27', ': ', array([ 0, 0, 48, 0]), ' ', arra…	1100000000000	0.997959	0.273977	0.999999	1
84	11	118686017	TTCxAGA	A	C	[('RPE5W22', ': ', array([52, 0, 17, 0]), ' ', array([ 0.75362319, 0. , 0.24637681, 0. ]), ' ', array([ 1., 0., 1., 0.])), ('RPE5W23', ': ', array([27, 0, 14, 0]), ' ', array([ 0.65853659, 0. , 0.34146341, 0. ]), ' ', array([ 1., 0., 1., 0.])), ('RPE5W24', ': ', array([49, 0, 0, 1]), ' ', array([ 0.98, 0. , 0. , 0.02]), ' ', array([ 1., 0., 0., 0.])), ('RPE5W27', ': ', array([41, 0, 1, 0]), ' ', …	1100000000000	0.989529	0.262723	1	1
85	11	120125189	TTTxTTA	G	A	[('RPE5W22', ': ', array([13, 0, 0, 55]), ' ', array([ 0.19117647, 0. , 0. , 0.80882353]), ' ', array([ 0., 0., 0., 1.])), ('RPE5W23', ': ', array([15, 0, 0, 24]), ' ', array([ 0.38461538, 0. , 0. , 0.61538462]), ' ', array([ 1., 0., 0., 1.])), ('RPE5W24', ': ', array([ 0, 0, 0, 67]), ' ', array([ 0., 0., 0., 1.]), ' ', array([ 0., 0., 0., 1.])), ('RPE5W27', ': ', array([ 0, 0, 0, 51]), ' ', arra…	1100000000000	0.998	0.283088	1	1
86	12	17288330	TTTxCTA	G	C	[('RPE5W22', ': ', array([ 1, 0, 16, 52]), ' ', array([ 0.01449275, 0. , 0.23188406, 0.75362319]), ' ', array([ 0., 0., 1., 1.])), ('RPE5W23', ': ', array([ 0, 0, 11, 47]), ' ', array([ 0. , 0. , 0.18965517, 0.81034483]), ' ', array([ 0., 0., 0., 1.])), ('RPE5W24', ': ', array([ 0, 0, 0, 37]), ' ', array([ 0., 0., 0., 1.]), ' ', array([ 0., 0., 0., 1.])), ('RPE5W27', ': ', array([ 1, 0, 0, 37]), …	1100000000000	0.986145	0.178442	0.997082	1
87	12	101962467	AAGxTAA	G	A	[('RPE5W22', ': ', array([23, 0, 0, 49]), ' ', array([ 0.31944444, 0. , 0. , 0.68055556]), ' ', array([ 1., 0., 0., 1.])), ('RPE5W23', ': ', array([17, 0, 0, 39]), ' ', array([ 0.30357143, 0. , 0. , 0.69642857]), ' ', array([ 1., 0., 0., 1.])), ('RPE5W24', ': ', array([ 0, 0, 0, 63]), ' ', array([ 0., 0., 0., 1.]), ' ', array([ 0., 0., 0., 1.])), ('RPE5W27', ': ', array([ 0, 0, 0, 48]), ' ', arra…	1100000000000	0.997561	0.249722	0.999999	1
88	13	19254046	GATxATA	A	G	[('RPE5W22', ': ', array([37, 0, 0, 20]), ' ', array([ 0.64912281, 0. , 0. , 0.35087719]), ' ', array([ 1., 0., 0., 1.])), ('RPE5W23', ': ', array([15, 0, 0, 7]), ' ', array([ 0.68181818, 0. , 0. , 0.31818182]), ' ', array([ 1., 0., 0., 1.])), ('RPE5W24', ': ', array([41, 0, 0, 0]), ' ', array([ 1., 0., 0., 0.]), ' ', array([ 1., 0., 0., 0.])), ('RPE5W27', ': ', array([31, 0, 0, 0]), ' ', array([…	1100000000000	0.993881	0.326954	0.999991	1
89	13	25609786	CTGxGAT	A	G	[('RPE5W22', ': ', array([36, 0, 0, 16]), ' ', array([ 0.69230769, 0. , 0. , 0.30769231]), ' ', array([ 1., 0., 0., 1.])), ('RPE5W23', ': ', array([29, 0, 1, 15]), ' ', array([ 0.64444444, 0. , 0.02222222, 0.33333333]), ' ', array([ 1., 0., 0., 1.])), ('RPE5W24', ': ', array([43, 0, 0, 0]), ' ', array([ 1., 0., 0., 0.]), ' ', array([ 1., 0., 0., 0.])), ('RPE5W27', ': ', array([34, 0, 0, 0]), ' ',…	1100000000000	0.997835	0.307692	0.999998	1
90	13	66980035	AAGxTAA	A	C	[('RPE5W22', ': ', array([31, 0, 27, 0]), ' ', array([ 0.53448276, 0. , 0.46551724, 0. ]), ' ', array([ 1., 0., 1., 0.])), ('RPE5W23', ': ', array([32, 0, 11, 0]), ' ', array([ 0.74418605, 0. , 0.25581395, 0. ]), ' ', array([ 1., 0., 1., 0.])), ('RPE5W24', ': ', array([24, 0, 0, 0]), ' ', array([ 1., 0., 0., 0.]), ' ', array([ 1., 0., 0., 0.])), ('RPE5W27', ': ', array([33, 0, 0, 0]), ' ', array(…	1100000000000	1	0.381407	0.999944	1
91	13	79308799	CTGxTAC	T	C	[('RPE5W22', ': ', array([ 0, 38, 19, 0]), ' ', array([ 0. , 0.66666667, 0.33333333, 0. ]), ' ', array([ 0., 1., 1., 0.])), ('RPE5W23', ': ', array([ 0, 29, 11, 0]), ' ', array([ 0. , 0.725, 0.275, 0. ]), ' ', array([ 0., 1., 1., 0.])), ('RPE5W24', ': ', array([ 0, 35, 0, 0]), ' ', array([ 0., 1., 0., 0.]), ' ', array([ 0., 1., 0., 0.])), ('RPE5W27', ': ', array([ 0, 37, 0, 1]), ' ', array([ 0. ,…	1100000000000	0.994577	0.333333	0.999997	1
92	13	87019446	TCTxGTT	G	A	[('RPE5W22', ': ', array([15, 0, 0, 38]), ' ', array([ 0.28301887, 0. , 0. , 0.71698113]), ' ', array([ 1., 0., 0., 1.])), ('RPE5W23', ': ', array([19, 0, 0, 16]), ' ', array([ 0.54285714, 0. , 0. , 0.45714286]), ' ', array([ 1., 0., 0., 1.])), ('RPE5W24', ': ', array([ 0, 0, 0, 26]), ' ', array([ 0., 0., 0., 1.]), ' ', array([ 0., 0., 0., 1.])), ('RPE5W27', ': ', array([ 0, 1, 0, 24]), ' ', arra…	1100000000000	0.988985	0.283019	0.999999	1
93	13	98325713	GAGxAGT	G	C	[('RPE5W22', ': ', array([ 0, 0, 13, 36]), ' ', array([ 0. , 0. , 0.26530612, 0.73469388]), ' ', array([ 0., 0., 1., 1.])), ('RPE5W23', ': ', array([ 0, 0, 16, 34]), ' ', array([ 0. , 0. , 0.32, 0.68]), ' ', array([ 0., 0., 1., 1.])), ('RPE5W24', ': ', array([ 0, 0, 0, 34]), ' ', array([ 0., 0., 0., 1.]), ' ', array([ 0., 0., 0., 1.])), ('RPE5W27', ': ', array([ 0, 0, 0, 44]), ' ', array([ 0., 0.…	1100000000000	0.997297	0.2503	0.999848	1
94	14	23037574	CAAxGCC	A	G	[('RPE5W22', ': ', array([33, 0, 0, 22]), ' ', array([ 0.6, 0. , 0. , 0.4]), ' ', array([ 1., 0., 0., 1.])), ('RPE5W23', ': ', array([22, 0, 1, 15]), ' ', array([ 0.57894737, 0. , 0.02631579, 0.39473684]), ' ', array([ 1., 0., 0., 1.])), ('RPE5W24', ': ', array([35, 1, 0, 0]), ' ', array([ 0.97222222, 0.02777778, 0. , 0. ]), ' ', array([ 1., 0., 0., 0.])), ('RPE5W27', ': ', array([38, 0, 0, 0]), …	1100000000000	0.988342	0.354762	0.999996	1
95	14	37364502	TCCxTTT	A	G	[('RPE5W22', ': ', array([26, 0, 0, 14]), ' ', array([ 0.65, 0. , 0. , 0.35]), ' ', array([ 1., 0., 0., 1.])), ('RPE5W23', ': ', array([31, 0, 0, 15]), ' ', array([ 0.67391304, 0. , 0. , 0.32608696]), ' ', array([ 1., 0., 0., 1.])), ('RPE5W24', ': ', array([38, 0, 0, 0]), ' ', array([ 1., 0., 0., 0.]), ' ', array([ 1., 0., 0., 0.])), ('RPE5W27', ': ', array([31, 0, 1, 0]), ' ', array([ 0.96875, 0…	1100000000000	0.986529	0.307353	0.999992	1
96	14	79348576	AGGxAAA	G	T	[('RPE5W22', ': ', array([ 0, 11, 0, 35]), ' ', array([ 0. , 0.23913043, 0. , 0.76086957]), ' ', array([ 0., 1., 0., 1.])), ('RPE5W23', ': ', array([ 0, 18, 0, 25]), ' ', array([ 0. , 0.41860465, 0. , 0.58139535]), ' ', array([ 0., 1., 0., 1.])), ('RPE5W24', ': ', array([ 0, 0, 1, 43]), ' ', array([ 0. , 0. , 0.02272727, 0.97727273]), ' ', array([ 0., 0., 0., 1.])), ('RPE5W27', ': ', array([ 0, 0…	1100000000000	0.991211	0.23913	0.999977	1
97	14	99174768	TAGxCAC	T	A	[('RPE5W22', ': ', array([12, 29, 0, 0]), ' ', array([ 0.29268293, 0.70731707, 0. , 0. ]), ' ', array([ 1., 1., 0., 0.])), ('RPE5W23', ': ', array([ 7, 14, 0, 0]), ' ', array([ 0.33333333, 0.66666667, 0. , 0. ]), ' ', array([ 1., 1., 0., 0.])), ('RPE5W24', ': ', array([ 0, 42, 0, 0]), ' ', array([ 0., 1., 0., 0.]), ' ', array([ 0., 1., 0., 0.])), ('RPE5W27', ': ', array([ 0, 34, 0, 0]), ' ', arra…	1100000000000	0.993631	0.292683	0.999999	1
98	15	35385470	AACxAGT	C	A	[('RPE5W22', ': ', array([19, 0, 28, 0]), ' ', array([ 0.40425532, 0. , 0.59574468, 0. ]), ' ', array([ 1., 0., 1., 0.])), ('RPE5W23', ': ', array([ 6, 0, 24, 0]), ' ', array([ 0.2, 0. , 0.8, 0. ]), ' ', array([ 0., 0., 1., 0.])), ('RPE5W24', ': ', array([ 0, 0, 38, 0]), ' ', array([ 0., 0., 1., 0.]), ' ', array([ 0., 0., 1., 0.])), ('RPE5W27', ': ', array([ 0, 0, 34, 0]), ' ', array([ 0., 0., 1.…	1100000000000	0.997561	0.377803	0.999994	1
99	15	58209550	ATCxTGG	C	T	[('RPE5W22', ': ', array([ 0, 12, 30, 0]), ' ', array([ 0. , 0.28571429, 0.71428571, 0. ]), ' ', array([ 0., 1., 1., 0.])), ('RPE5W23', ': ', array([ 0, 14, 22, 0]), ' ', array([ 0. , 0.38888889, 0.61111111, 0. ]), ' ', array([ 0., 1., 1., 0.])), ('RPE5W24', ': ', array([ 0, 1, 39, 0]), ' ', array([ 0. , 0.025, 0.975, 0. ]), ' ', array([ 0., 0., 1., 0.])), ('RPE5W27', ': ', array([ 0, 0, 34, 0]),…	1100000000000	0.980955	0.320276	0.999939	1
100	15	78640081	CCTxTTT	C	T	[('RPE5W22', ': ', array([ 0, 14, 22, 0]), ' ', array([ 0. , 0.38888889, 0.61111111, 0. ]), ' ', array([ 0., 1., 1., 0.])), ('RPE5W23', ': ', array([ 0, 12, 24, 1]), ' ', array([ 0. , 0.32432432, 0.64864865, 0.02702703]), ' ', array([ 0., 1., 1., 0.])), ('RPE5W24', ': ', array([ 0, 0, 47, 1]), ' ', array([ 0. , 0. , 0.97916667, 0.02083333]), ' ', array([ 0., 0., 1., 0.])), ('RPE5W27', ': ', array…	1100000000000	0.995478	0.403747	0.999997	1
101	15	81972541	AAGxCAG	G	T	[('RPE5W22', ': ', array([ 0, 9, 0, 29]), ' ', array([ 0. , 0.23684211, 0. , 0.76315789]), ' ', array([ 0., 1., 0., 1.])), ('RPE5W23', ': ', array([ 1, 11, 0, 17]), ' ', array([ 0.03448276, 0.37931034, 0. , 0.5862069 ]), ' ', array([ 0., 1., 0., 1.])), ('RPE5W24', ': ', array([ 0, 1, 0, 36]), ' ', array([ 0. , 0.02702703, 0. , 0.97297297]), ' ', array([ 0., 0., 0., 1.])), ('RPE5W27', ': ', array(…	1100000000000	0.994172	0.309598	0.999999	1
102	16	14922542	TCTxCGC	T	A	[('RPE5W22', ': ', array([18, 46, 1, 0]), ' ', array([ 0.27692308, 0.70769231, 0.01538462, 0. ]), ' ', array([ 1., 1., 0., 0.])), ('RPE5W23', ': ', array([10, 27, 0, 1]), ' ', array([ 0.26315789, 0.71052632, 0. , 0.02631579]), ' ', array([ 1., 1., 0., 0.])), ('RPE5W24', ': ', array([ 0, 84, 0, 0]), ' ', array([ 0., 1., 0., 0.]), ' ', array([ 0., 1., 0., 0.])), ('RPE5W27', ': ', array([ 0, 56, 0, …	1100000000000	0.995631	0.211378	0.999985	1
103	16	60846732	TATxCCC	C	A	[('RPE5W22', ': ', array([24, 0, 45, 0]), ' ', array([ 0.34782609, 0. , 0.65217391, 0. ]), ' ', array([ 1., 0., 1., 0.])), ('RPE5W23', ': ', array([10, 0, 33, 0]), ' ', array([ 0.23255814, 0. , 0.76744186, 0. ]), ' ', array([ 1., 0., 1., 0.])), ('RPE5W24', ': ', array([ 1, 0, 41, 0]), ' ', array([ 0.02380952, 0. , 0.97619048, 0. ]), ' ', array([ 0., 0., 1., 0.])), ('RPE5W27', ': ', array([ 0, 0, …	1100000000000	0.995732	0.247987	0.999748	1
104	17	10267810	GCTxCTT	G	A	[('RPE5W22', ': ', array([22, 1, 0, 34]), ' ', array([ 0.38596491, 0.01754386, 0. , 0.59649123]), ' ', array([ 1., 0., 0., 1.])), ('RPE5W23', ': ', array([ 8, 0, 0, 21]), ' ', array([ 0.27586207, 0. , 0. , 0.72413793]), ' ', array([ 1., 0., 0., 1.])), ('RPE5W24', ': ', array([ 0, 0, 0, 47]), ' ', array([ 0., 0., 0., 1.]), ' ', array([ 0., 0., 0., 1.])), ('RPE5W27', ': ', array([ 0, 0, 0, 37]), ' …	1100000000000	1	0.2582	0.990087	1
105	17	10451396	TGAxACA	G	T	[('RPE5W22', ': ', array([ 0, 9, 0, 28]), ' ', array([ 0. , 0.24324324, 0. , 0.75675676]), ' ', array([ 0., 1., 0., 1.])), ('RPE5W23', ': ', array([ 0, 9, 0, 33]), ' ', array([ 0. , 0.21428571, 0. , 0.78571429]), ' ', array([ 0., 1., 0., 1.])), ('RPE5W24', ': ', array([ 0, 1, 0, 37]), ' ', array([ 0. , 0.02631579, 0. , 0.97368421]), ' ', array([ 0., 0., 0., 1.])), ('RPE5W27', ': ', array([ 0, 1, …	1100000000000	0.982419	0.274399	0.99571	1
106	17	71682135	ATGxCTA	T	C	[('RPE5W22', ': ', array([ 0, 31, 21, 1]), ' ', array([ 0. , 0.58490566, 0.39622642, 0.01886792]), ' ', array([ 0., 1., 1., 0.])), ('RPE5W23', ': ', array([ 0, 24, 13, 0]), ' ', array([ 0. , 0.64864865, 0.35135135, 0. ]), ' ', array([ 0., 1., 1., 0.])), ('RPE5W24', ': ', array([ 0, 43, 0, 0]), ' ', array([ 0., 1., 0., 0.]), ' ', array([ 0., 1., 0., 0.])), ('RPE5W27', ': ', array([ 0, 37, 1, 0]), …	1100000000000	0.994868	0.311016	0.999977	1
107	18	24616034	ATCxATA	T	C	[('RPE5W22', ': ', array([ 0, 24, 9, 0]), ' ', array([ 0. , 0.72727273, 0.27272727, 0. ]), ' ', array([ 0., 1., 1., 0.])), ('RPE5W23', ': ', array([ 0, 13, 11, 0]), ' ', array([ 0. , 0.54166667, 0.45833333, 0. ]), ' ', array([ 0., 1., 1., 0.])), ('RPE5W24', ': ', array([ 1, 31, 0, 0]), ' ', array([ 0.03125, 0.96875, 0. , 0. ]), ' ', array([ 0., 1., 0., 0.])), ('RPE5W27', ': ', array([ 0, 22, 0, 1…	1100000000000	0.988956	0.358586	0.999971	1
108	18	50063632	ATGxATA	G	C	[('RPE5W22', ': ', array([ 0, 0, 17, 19]), ' ', array([ 0. , 0. , 0.47222222, 0.52777778]), ' ', array([ 0., 0., 1., 1.])), ('RPE5W23', ': ', array([ 0, 0, 8, 13]), ' ', array([ 0. , 0. , 0.38095238, 0.61904762]), ' ', array([ 0., 0., 1., 1.])), ('RPE5W24', ': ', array([ 0, 0, 0, 17]), ' ', array([ 0., 0., 0., 1.]), ' ', array([ 0., 0., 0., 1.])), ('RPE5W27', ': ', array([ 1, 0, 0, 31]), ' ', arr…	1100000000000	0.994024	0.472222	0.999911	1
109	19	1713538	TGAxTTT	T	G	[('RPE5W22', ': ', array([ 0, 24, 0, 16]), ' ', array([ 0. , 0.6, 0. , 0.4]), ' ', array([ 0., 1., 0., 1.])), ('RPE5W23', ': ', array([ 0, 19, 0, 8]), ' ', array([ 0. , 0.7037037, 0. , 0.2962963]), ' ', array([ 0., 1., 0., 1.])), ('RPE5W24', ': ', array([ 0, 33, 0, 0]), ' ', array([ 0., 1., 0., 0.]), ' ', array([ 0., 1., 0., 0.])), ('RPE5W27', ': ', array([ 0, 36, 1, 0]), ' ', array([ 0. , 0.9729…	1100000000000	0.984995	0.3875	0.999997	1
110	19	2700069	TCTxTCT	G	T	[('RPE5W22', ': ', array([ 0, 11, 0, 32]), ' ', array([ 0. , 0.25581395, 0. , 0.74418605]), ' ', array([ 0., 1., 0., 1.])), ('RPE5W23', ': ', array([ 0, 13, 1, 25]), ' ', array([ 0. , 0.33333333, 0.02564103, 0.64102564]), ' ', array([ 0., 1., 0., 1.])), ('RPE5W24', ': ', array([ 0, 0, 0, 27]), ' ', array([ 0., 0., 0., 1.]), ' ', array([ 0., 0., 0., 1.])), ('RPE5W27', ': ', array([ 0, 0, 0, 35]), …	1100000000000	0.984045	0.218816	0.999881	1
111	19	57210380	CCGxCTT	C	T	[('RPE5W22', ': ', array([ 0, 8, 30, 1]), ' ', array([ 0. , 0.20512821, 0.76923077, 0.02564103]), ' ', array([ 0., 1., 1., 0.])), ('RPE5W23', ': ', array([ 0, 10, 18, 0]), ' ', array([ 0. , 0.35714286, 0.64285714, 0. ]), ' ', array([ 0., 1., 1., 0.])), ('RPE5W24', ': ', array([ 0, 0, 43, 0]), ' ', array([ 0., 0., 1., 0.]), ' ', array([ 0., 0., 1., 0.])), ('RPE5W27', ': ', array([ 1, 0, 32, 0]), '…	1100000000000	0.99697	0.211939	0.999964	1
112	20	5403224	GGGxAAA	C	A	[('RPE5W22', ': ', array([19, 1, 41, 1]), ' ', array([ 0.30645161, 0.01612903, 0.66129032, 0.01612903]), ' ', array([ 1., 0., 1., 0.])), ('RPE5W23', ': ', array([15, 0, 33, 0]), ' ', array([ 0.3125, 0. , 0.6875, 0. ]), ' ', array([ 1., 0., 1., 0.])), ('RPE5W24', ': ', array([ 1, 0, 64, 0]), ' ', array([ 0.01538462, 0. , 0.98461538, 0. ]), ' ', array([ 0., 0., 1., 0.])), ('RPE5W27', ': ', array([ …	1100000000000	0.985382	0.285879	0.999925	1
113	20	34647570	GTGxATC	G	T	[('RPE5W22', ': ', array([ 0, 20, 0, 38]), ' ', array([ 0. , 0.34482759, 0. , 0.65517241]), ' ', array([ 0., 1., 0., 1.])), ('RPE5W23', ': ', array([ 0, 10, 0, 37]), ' ', array([ 0. , 0.21276596, 0. , 0.78723404]), ' ', array([ 0., 1., 0., 1.])), ('RPE5W24', ': ', array([ 0, 0, 0, 43]), ' ', array([ 0., 0., 0., 1.]), ' ', array([ 0., 0., 0., 1.])), ('RPE5W27', ': ', array([ 0, 0, 0, 42]), ' ', ar…	1100000000000	0.992741	0.247885	0.999985	1
114	20	51129283	TTTxAAA	T	G	[('RPE5W22', ': ', array([ 0, 50, 0, 21]), ' ', array([ 0. , 0.70422535, 0. , 0.29577465]), ' ', array([ 0., 1., 0., 1.])), ('RPE5W23', ': ', array([ 0, 27, 0, 12]), ' ', array([ 0. , 0.69230769, 0. , 0.30769231]), ' ', array([ 0., 1., 0., 1.])), ('RPE5W24', ': ', array([ 1, 50, 0, 0]), ' ', array([ 0.01960784, 0.98039216, 0. , 0. ]), ' ', array([ 0., 1., 0., 0.])), ('RPE5W27', ': ', array([ 0, 4…	1100000000000	0.994706	0.279466	1	1
115	21	10401915	ATTxCAT	A	C	[('RPE5W22', ': ', array([154, 1, 19, 0]), ' ', array([ 0.88505747, 0.00574713, 0.1091954 , 0. ]), ' ', array([ 1., 0., 0., 0.])), ('RPE5W23', ': ', array([100, 0, 16, 0]), ' ', array([ 0.86206897, 0. , 0.13793103, 0. ]), ' ', array([ 1., 0., 0., 0.])), ('RPE5W24', ': ', array([130, 0, 0, 0]), ' ', array([ 1., 0., 0., 0.]), ' ', array([ 1., 0., 0., 0.])), ('RPE5W27', ': ', array([115, 0, 0, 0]), …	1100000000000	0.999057	0.0995415	0.999999	1
116	21	10873695	CTTxATA	C	T	[('RPE5W22', ': ', array([ 0, 15, 97, 0]), ' ', array([ 0. , 0.13392857, 0.86607143, 0. ]), ' ', array([ 0., 0., 1., 0.])), ('RPE5W23', ': ', array([ 0, 21, 71, 0]), ' ', array([ 0. , 0.22826087, 0.77173913, 0. ]), ' ', array([ 0., 1., 1., 0.])), ('RPE5W24', ': ', array([ 0, 0, 85, 0]), ' ', array([ 0., 0., 1., 0.]), ' ', array([ 0., 0., 1., 0.])), ('RPE5W27', ': ', array([ 0, 0, 72, 0]), ' ', ar…	1100000000000	0.997468	0.116145	0.999997	1
117	21	30595496	TCAxCAT	G	T	[('RPE5W22', ': ', array([ 0, 19, 0, 43]), ' ', array([ 0. , 0.30645161, 0. , 0.69354839]), ' ', array([ 0., 1., 0., 1.])), ('RPE5W23', ': ', array([ 0, 13, 0, 31]), ' ', array([ 0. , 0.29545455, 0. , 0.70454545]), ' ', array([ 0., 1., 0., 1.])), ('RPE5W24', ': ', array([ 0, 0, 1, 38]), ' ', array([ 0. , 0. , 0.02564103, 0.97435897]), ' ', array([ 0., 0., 0., 1.])), ('RPE5W27', ': ', array([ 0, 0…	1100000000000	0.994658	0.370207	1	1
118	X	1727275	CATxCTC	C	T	[('RPE5W22', ': ', array([ 0, 19, 36, 1]), ' ', array([ 0. , 0.33928571, 0.64285714, 0.01785714]), ' ', array([ 0., 1., 1., 0.])), ('RPE5W23', ': ', array([ 0, 7, 15, 0]), ' ', array([ 0. , 0.31818182, 0.68181818, 0. ]), ' ', array([ 0., 1., 1., 0.])), ('RPE5W24', ': ', array([ 0, 0, 34, 0]), ' ', array([ 0., 0., 1., 0.]), ' ', array([ 0., 0., 1., 0.])), ('RPE5W27', ': ', array([ 0, 0, 34, 0]), '…	1100000000000	1	0.339286	1	1
119	X	4246128	ATAxTTT	A	T	[('RPE5W22', ': ', array([45, 15, 0, 0]), ' ', array([ 0.75, 0.25, 0. , 0. ]), ' ', array([ 1., 1., 0., 0.])), ('RPE5W23', ': ', array([27, 17, 0, 0]), ' ', array([ 0.61363636, 0.38636364, 0. , 0. ]), ' ', array([ 1., 1., 0., 0.])), ('RPE5W24', ': ', array([49, 0, 1, 0]), ' ', array([ 0.98, 0. , 0.02, 0. ]), ' ', array([ 1., 0., 0., 0.])), ('RPE5W27', ': ', array([38, 0, 0, 0]), ' ', array([ 1., …	1100000000000	0.996162	0.25	1	1
120	X	5330601	CCAxATA	G	A	[('RPE5W22', ': ', array([14, 0, 0, 39]), ' ', array([ 0.26415094, 0. , 0. , 0.73584906]), ' ', array([ 1., 0., 0., 1.])), ('RPE5W23', ': ', array([ 8, 0, 0, 26]), ' ', array([ 0.23529412, 0. , 0. , 0.76470588]), ' ', array([ 1., 0., 0., 1.])), ('RPE5W24', ': ', array([ 0, 0, 0, 45]), ' ', array([ 0., 0., 0., 1.]), ' ', array([ 0., 0., 0., 1.])), ('RPE5W27', ': ', array([ 0, 0, 0, 46]), ' ', arra…	1100000000000	0.994858	0.313894	0.999878	1
121	X	5853196	AAAxAAG	G	T	[('RPE5W22', ': ', array([ 0, 20, 1, 49]), ' ', array([ 0. , 0.28571429, 0.01428571, 0.7 ]), ' ', array([ 0., 1., 0., 1.])), ('RPE5W23', ': ', array([ 0, 16, 0, 31]), ' ', array([ 0. , 0.34042553, 0. , 0.65957447]), ' ', array([ 0., 1., 0., 1.])), ('RPE5W24', ': ', array([ 0, 0, 0, 42]), ' ', array([ 0., 0., 0., 1.]), ' ', array([ 0., 0., 0., 1.])), ('RPE5W27', ': ', array([ 0, 0, 0, 24]), ' ', a…	1100000000000	0.985546	0.283482	0.999956	1
122	X	28405648	AATxTTG	G	T	[('RPE5W22', ': ', array([ 1, 20, 0, 41]), ' ', array([ 0.01612903, 0.32258065, 0. , 0.66129032]), ' ', array([ 0., 1., 0., 1.])), ('RPE5W23', ': ', array([ 0, 9, 0, 24]), ' ', array([ 0. , 0.27272727, 0. , 0.72727273]), ' ', array([ 0., 1., 0., 1.])), ('RPE5W24', ': ', array([ 0, 0, 0, 46]), ' ', array([ 0., 0., 0., 1.]), ' ', array([ 0., 0., 0., 1.])), ('RPE5W27', ': ', array([ 0, 0, 0, 42]), '…	1100000000000	1	0.34879	0.999944	1
123	X	95406382	AAAxCAA	C	A	[('RPE5W22', ': ', array([13, 0, 19, 0]), ' ', array([ 0.40625, 0. , 0.59375, 0. ]), ' ', array([ 1., 0., 1., 0.])), ('RPE5W23', ': ', array([16, 0, 25, 1]), ' ', array([ 0.38095238, 0. , 0.5952381 , 0.02380952]), ' ', array([ 1., 0., 1., 0.])), ('RPE5W24', ': ', array([ 0, 0, 25, 1]), ' ', array([ 0. , 0. , 0.96153846, 0.03846154]), ' ', array([ 0., 0., 1., 0.])), ('RPE5W27', ': ', array([ 0, 0,…	1100000000000	0.988473	0.341056	0.999889	1
124	X	115493867	ATAxCTT	C	A	[('RPE5W22', ': ', array([21, 0, 22, 0]), ' ', array([ 0.48837209, 0. , 0.51162791, 0. ]), ' ', array([ 1., 0., 1., 0.])), ('RPE5W23', ': ', array([17, 0, 25, 0]), ' ', array([ 0.4047619, 0. , 0.5952381, 0. ]), ' ', array([ 1., 0., 1., 0.])), ('RPE5W24', ': ', array([ 0, 0, 31, 0]), ' ', array([ 0., 0., 1., 0.]), ' ', array([ 0., 0., 1., 0.])), ('RPE5W27', ': ', array([ 0, 0, 47, 0]), ' ', array(…	1100000000000	0.99449	0.488372	1	1
125	X	138579113	CAAxTCT	G	T	[('RPE5W22', ': ', array([ 0, 14, 0, 38]), ' ', array([ 0. , 0.26923077, 0. , 0.73076923]), ' ', array([ 0., 1., 0., 1.])), ('RPE5W23', ': ', array([ 0, 10, 0, 15]), ' ', array([ 0. , 0.4, 0. , 0.6]), ' ', array([ 0., 1., 0., 1.])), ('RPE5W24', ': ', array([ 0, 0, 0, 44]), ' ', array([ 0., 0., 0., 1.]), ' ', array([ 0., 0., 0., 1.])), ('RPE5W27', ': ', array([ 1, 0, 0, 55]), ' ', array([ 0.017857…	1100000000000	0.990398	0.29251	0.999999	1
126	1	92172416	ACAxAAT	C	G	[('RPE5W22', ': ', array([ 0, 0, 31, 18]), ' ', array([ 0. , 0. , 0.63265306, 0.36734694]), ' ', array([ 0., 0., 1., 1.])), ('RPE5W23', ': ', array([ 0, 0, 22, 9]), ' ', array([ 0. , 0. , 0.70967742, 0.29032258]), ' ', array([ 0., 0., 1., 1.])), ('RPE5W24', ': ', array([ 0, 0, 25, 18]), ' ', array([ 0. , 0. , 0.58139535, 0.41860465]), ' ', array([ 0., 0., 1., 1.])), ('RPE5W27', ': ', array([ 0, 0…	1110000000000	0.982968	0.463155	1	1
127	1	94330055	TGAxAGA	G	A	[('RPE5W22', ': ', array([12, 0, 0, 28]), ' ', array([ 0.3, 0. , 0. , 0.7]), ' ', array([ 1., 0., 0., 1.])), ('RPE5W23', ': ', array([14, 0, 0, 19]), ' ', array([ 0.42424242, 0. , 0. , 0.57575758]), ' ', array([ 1., 0., 0., 1.])), ('RPE5W24', ': ', array([15, 0, 0, 28]), ' ', array([ 0.34883721, 0. , 0. , 0.65116279]), ' ', array([ 1., 0., 0., 1.])), ('RPE5W27', ': ', array([13, 0, 0, 25]), ' ', …	1110000000000	0.993199	0.322736	1	1
128	1	142597689	CAGxTAA	T	C	[('RPE5W22', ': ', array([ 3, 165, 17, 0]), ' ', array([ 0.01621622, 0.89189189, 0.09189189, 0. ]), ' ', array([ 0., 1., 0., 0.])), ('RPE5W23', ': ', array([ 0, 130, 11, 0]), ' ', array([ 0. , 0.92198582, 0.07801418, 0. ]), ' ', array([ 0., 1., 0., 0.])), ('RPE5W24', ': ', array([ 1, 130, 10, 1]), ' ', array([ 0.00704225, 0.91549296, 0.07042254, 0.00704225]), ' ', array([ 0., 1., 0., 0.])), ('RPE…	1110000000000	0.991795	0.100584	0.999997	1
129	1	147336394	TCTxCAG	A	G	[('RPE5W22', ': ', array([34, 0, 0, 13]), ' ', array([ 0.72340426, 0. , 0. , 0.27659574]), ' ', array([ 1., 0., 0., 1.])), ('RPE5W23', ': ', array([34, 0, 0, 7]), ' ', array([ 0.82926829, 0. , 0. , 0.17073171]), ' ', array([ 1., 0., 0., 0.])), ('RPE5W24', ': ', array([21, 0, 0, 12]), ' ', array([ 0.63636364, 0. , 0. , 0.36363636]), ' ', array([ 1., 0., 0., 1.])), ('RPE5W27', ': ', array([19, 0, 0…	1110000000000	0.994565	0.376725	0.999649	1
130	1	163675128	ATTxCTA	G	T	[('RPE5W22', ': ', array([ 0, 22, 1, 37]), ' ', array([ 0. , 0.36666667, 0.01666667, 0.61666667]), ' ', array([ 0., 1., 0., 1.])), ('RPE5W23', ': ', array([ 0, 15, 0, 30]), ' ', array([ 0. , 0.33333333, 0. , 0.66666667]), ' ', array([ 0., 1., 0., 1.])), ('RPE5W24', ': ', array([ 0, 24, 0, 16]), ' ', array([ 0. , 0.6, 0. , 0.4]), ' ', array([ 0., 1., 0., 1.])), ('RPE5W27', ': ', array([ 0, 10, 0, …	1110000000000	0.980277	0.419345	0.999996	1
131	2	16854584	GCCxAGA	C	A	[('RPE5W22', ': ', array([14, 0, 28, 0]), ' ', array([ 0.33333333, 0. , 0.66666667, 0. ]), ' ', array([ 1., 0., 1., 0.])), ('RPE5W23', ': ', array([11, 0, 28, 0]), ' ', array([ 0.28205128, 0. , 0.71794872, 0. ]), ' ', array([ 1., 0., 1., 0.])), ('RPE5W24', ': ', array([18, 0, 21, 0]), ' ', array([ 0.46153846, 0. , 0.53846154, 0. ]), ' ', array([ 1., 0., 1., 0.])), ('RPE5W27', ': ', array([10, 0, …	1110000000000	0.996324	0.345904	0.999996	1
132	2	43085625	AGGxGAG	G	T	[('RPE5W22', ': ', array([ 0, 13, 0, 27]), ' ', array([ 0. , 0.325, 0. , 0.675]), ' ', array([ 0., 1., 0., 1.])), ('RPE5W23', ': ', array([ 0, 14, 0, 30]), ' ', array([ 0. , 0.31818182, 0. , 0.68181818]), ' ', array([ 0., 1., 0., 1.])), ('RPE5W24', ': ', array([ 0, 9, 0, 15]), ' ', array([ 0. , 0.375, 0. , 0.625]), ' ', array([ 0., 1., 0., 1.])), ('RPE5W27', ': ', array([ 0, 9, 0, 17]), ' ', arra…	1110000000000	0.991694	0.349774	0.999999	1
133	2	86872550	TTTxGCC	C	A	[('RPE5W22', ': ', array([24, 1, 37, 0]), ' ', array([ 0.38709677, 0.01612903, 0.59677419, 0. ]), ' ', array([ 1., 0., 1., 0.])), ('RPE5W23', ': ', array([ 9, 0, 18, 0]), ' ', array([ 0.33333333, 0. , 0.66666667, 0. ]), ' ', array([ 1., 0., 1., 0.])), ('RPE5W24', ': ', array([11, 0, 27, 0]), ' ', array([ 0.28947368, 0. , 0.71052632, 0. ]), ' ', array([ 1., 0., 1., 0.])), ('RPE5W27', ': ', array([…	1110000000000	0.991071	0.30008	0.998912	1
134	2	210066166	CTTxAGG	G	T	[('RPE5W22', ': ', array([ 0, 12, 0, 45]), ' ', array([ 0. , 0.21052632, 0. , 0.78947368]), ' ', array([ 0., 1., 0., 1.])), ('RPE5W23', ': ', array([ 0, 11, 0, 18]), ' ', array([ 0. , 0.37931034, 0. , 0.62068966]), ' ', array([ 0., 1., 0., 1.])), ('RPE5W24', ': ', array([ 0, 12, 0, 30]), ' ', array([ 0. , 0.28571429, 0. , 0.71428571]), ' ', array([ 0., 1., 0., 1.])), ('RPE5W27', ': ', array([ 0, …	1110000000000	0.990218	0.291211	0.999999	1
135	3	32987001	TCTxTTA	G	A	[('RPE5W22', ': ', array([16, 0, 0, 36]), ' ', array([ 0.30769231, 0. , 0. , 0.69230769]), ' ', array([ 1., 0., 0., 1.])), ('RPE5W23', ': ', array([10, 0, 1, 32]), ' ', array([ 0.23255814, 0. , 0.02325581, 0.74418605]), ' ', array([ 1., 0., 0., 1.])), ('RPE5W24', ': ', array([11, 0, 0, 23]), ' ', array([ 0.32352941, 0. , 0. , 0.67647059]), ' ', array([ 1., 0., 0., 1.])), ('RPE5W27', ': ', array([…	1110000000000	0.993139	0.319355	0.999999	1
136	3	54693921	TTTxTGG	G	T	[('RPE5W22', ': ', array([ 0, 17, 0, 44]), ' ', array([ 0. , 0.27868852, 0. , 0.72131148]), ' ', array([ 0., 1., 0., 1.])), ('RPE5W23', ': ', array([ 0, 9, 0, 23]), ' ', array([ 0. , 0.28125, 0. , 0.71875]), ' ', array([ 0., 1., 0., 1.])), ('RPE5W24', ': ', array([ 0, 8, 0, 23]), ' ', array([ 0. , 0.25806452, 0. , 0.74193548]), ' ', array([ 0., 1., 0., 1.])), ('RPE5W27', ': ', array([ 0, 12, 1, 2…	1110000000000	0.992763	0.294371	0.999968	1
137	3	153487079	CAGxGCC	A	T	[('RPE5W22', ': ', array([27, 15, 1, 0]), ' ', array([ 0.62790698, 0.34883721, 0.02325581, 0. ]), ' ', array([ 1., 1., 0., 0.])), ('RPE5W23', ': ', array([29, 11, 0, 0]), ' ', array([ 0.725, 0.275, 0. , 0. ]), ' ', array([ 1., 1., 0., 0.])), ('RPE5W24', ': ', array([25, 17, 1, 0]), ' ', array([ 0.58139535, 0.39534884, 0.02325581, 0. ]), ' ', array([ 1., 1., 0., 0.])), ('RPE5W27', ': ', array([27,…	1110000000000	0.986075	0.347942	1	1
138	3	191894476	CAAxAAT	A	G	[('RPE5W22', ': ', array([44, 0, 0, 15]), ' ', array([ 0.74576271, 0. , 0. , 0.25423729]), ' ', array([ 1., 0., 0., 1.])), ('RPE5W23', ': ', array([16, 0, 0, 12]), ' ', array([ 0.57142857, 0. , 0. , 0.42857143]), ' ', array([ 1., 0., 0., 1.])), ('RPE5W24', ': ', array([23, 0, 0, 8]), ' ', array([ 0.74193548, 0. , 0. , 0.25806452]), ' ', array([ 1., 0., 0., 1.])), ('RPE5W27', ': ', array([29, 0, 0…	1110000000000	0.992216	0.273615	0.999557	1
139	4	58424383	GTCxCTG	T	A	[('RPE5W22', ': ', array([15, 39, 1, 0]), ' ', array([ 0.27272727, 0.70909091, 0.01818182, 0. ]), ' ', array([ 1., 1., 0., 0.])), ('RPE5W23', ': ', array([ 8, 27, 0, 0]), ' ', array([ 0.22857143, 0.77142857, 0. , 0. ]), ' ', array([ 1., 1., 0., 0.])), ('RPE5W24', ': ', array([11, 22, 0, 0]), ' ', array([ 0.33333333, 0.66666667, 0. , 0. ]), ' ', array([ 1., 1., 0., 0.])), ('RPE5W27', ': ', array([…	1110000000000	0.989387	0.311237	1	1
140	4	121945593	AAAxAAC	T	G	[('RPE5W22', ': ', array([ 0, 46, 0, 23]), ' ', array([ 0. , 0.66666667, 0. , 0.33333333]), ' ', array([ 0., 1., 0., 1.])), ('RPE5W23', ': ', array([ 0, 16, 0, 7]), ' ', array([ 0. , 0.69565217, 0. , 0.30434783]), ' ', array([ 0., 1., 0., 1.])), ('RPE5W24', ': ', array([ 0, 25, 1, 9]), ' ', array([ 0. , 0.69444444, 0.02777778, 0.25 ]), ' ', array([ 0., 1., 0., 1.])), ('RPE5W27', ': ', array([ 1, …	1110000000000	0.996429	0.248842	0.999963	1
141	4	132062884	GATxACG	C	A	[('RPE5W22', ': ', array([17, 0, 37, 0]), ' ', array([ 0.31481481, 0. , 0.68518519, 0. ]), ' ', array([ 1., 0., 1., 0.])), ('RPE5W23', ': ', array([10, 0, 22, 1]), ' ', array([ 0.3030303 , 0. , 0.66666667, 0.03030303]), ' ', array([ 1., 0., 1., 0.])), ('RPE5W24', ': ', array([15, 0, 27, 0]), ' ', array([ 0.35714286, 0. , 0.64285714, 0. ]), ' ', array([ 1., 0., 1., 0.])), ('RPE5W27', ': ', array([…	1110000000000	0.993546	0.349501	0.999953	1
142	4	163581452	CTCxGCT	A	T	[('RPE5W22', ': ', array([29, 21, 1, 0]), ' ', array([ 0.56862745, 0.41176471, 0.01960784, 0. ]), ' ', array([ 1., 1., 0., 0.])), ('RPE5W23', ': ', array([19, 13, 0, 0]), ' ', array([ 0.59375, 0.40625, 0. , 0. ]), ' ', array([ 1., 1., 0., 0.])), ('RPE5W24', ': ', array([28, 11, 0, 0]), ' ', array([ 0.71794872, 0.28205128, 0. , 0. ]), ' ', array([ 1., 1., 0., 0.])), ('RPE5W27', ': ', array([31, 10…	1110000000000	0.98026	0.370909	0.999997	1
143	5	71554604	ATCxCTG	T	C	[('RPE5W22', ': ', array([ 0, 44, 12, 0]), ' ', array([ 0. , 0.78571429, 0.21428571, 0. ]), ' ', array([ 0., 1., 1., 0.])), ('RPE5W23', ': ', array([ 0, 52, 7, 1]), ' ', array([ 0. , 0.86666667, 0.11666667, 0.01666667]), ' ', array([ 0., 1., 0., 0.])), ('RPE5W24', ': ', array([ 0, 36, 6, 0]), ' ', array([ 0. , 0.85714286, 0.14285714, 0. ]), ' ', array([ 0., 1., 0., 0.])), ('RPE5W27', ': ', array(…	1110000000000	0.986658	0.229826	0.999396	1
144	5	160282745	GTCxATG	T	G	[('RPE5W22', ': ', array([ 0, 56, 0, 20]), ' ', array([ 0. , 0.73684211, 0. , 0.26315789]), ' ', array([ 0., 1., 0., 1.])), ('RPE5W23', ': ', array([ 0, 50, 0, 13]), ' ', array([ 0. , 0.79365079, 0. , 0.20634921]), ' ', array([ 0., 1., 0., 1.])), ('RPE5W24', ': ', array([ 0, 41, 0, 11]), ' ', array([ 0. , 0.78846154, 0. , 0.21153846]), ' ', array([ 0., 1., 0., 1.])), ('RPE5W27', ': ', array([ 0, …	1110000000000	1	0.222455	0.999997	1
145	5	165232111	AATxTCG	G	T	[('RPE5W22', ': ', array([ 0, 19, 0, 57]), ' ', array([ 0. , 0.24675325, 0. , 0.74025974]), ' ', array([ 0., 1., 0., 1.])), ('RPE5W23', ': ', array([ 0, 6, 0, 37]), ' ', array([ 0. , 0.13953488, 0. , 0.86046512]), ' ', array([ 0., 0., 0., 1.])), ('RPE5W24', ': ', array([ 0, 9, 0, 37]), ' ', array([ 0. , 0.19565217, 0. , 0.80434783]), ' ', array([ 0., 0., 0., 1.])), ('RPE5W27', ': ', array([ 1, 11…	1110000000000	0.992284	0.235778	0.999937	1
146	6	144319506	CATxGAA	A	G	[('RPE5W22', ': ', array([45, 0, 0, 23]), ' ', array([ 0.66176471, 0. , 0. , 0.33823529]), ' ', array([ 1., 0., 0., 1.])), ('RPE5W23', ': ', array([26, 0, 0, 16]), ' ', array([ 0.61904762, 0. , 0. , 0.38095238]), ' ', array([ 1., 0., 0., 1.])), ('RPE5W24', ': ', array([30, 0, 0, 9]), ' ', array([ 0.76923077, 0. , 0. , 0.23076923]), ' ', array([ 1., 0., 0., 1.])), ('RPE5W27', ': ', array([26, 0, 0…	1110000000000	0.993975	0.278769	0.999559	1
147	7	37393418	TGCxGAT	T	G	[('RPE5W22', ': ', array([ 0, 52, 0, 14]), ' ', array([ 0. , 0.78787879, 0. , 0.21212121]), ' ', array([ 0., 1., 0., 1.])), ('RPE5W23', ': ', array([ 0, 31, 0, 10]), ' ', array([ 0. , 0.75609756, 0. , 0.24390244]), ' ', array([ 0., 1., 0., 1.])), ('RPE5W24', ': ', array([ 0, 39, 0, 13]), ' ', array([ 0. , 0.75, 0. , 0.25]), ' ', array([ 0., 1., 0., 1.])), ('RPE5W27', ': ', array([ 0, 25, 0, 14]),…	1110000000000	0.994708	0.25641	1	1
148	7	48114917	GTGxTGG	G	A	[('RPE5W22', ': ', array([14, 0, 0, 50]), ' ', array([ 0.21875, 0. , 0. , 0.78125]), ' ', array([ 1., 0., 0., 1.])), ('RPE5W23', ': ', array([12, 0, 0, 26]), ' ', array([ 0.31578947, 0. , 0. , 0.68421053]), ' ', array([ 1., 0., 0., 1.])), ('RPE5W24', ': ', array([14, 1, 0, 30]), ' ', array([ 0.31111111, 0.02222222, 0. , 0.66666667]), ' ', array([ 1., 0., 0., 1.])), ('RPE5W27', ': ', array([13, 0,…	1110000000000	0.996212	0.262992	0.99984	1
149	7	50434086	GCAxAAG	C	A	[('RPE5W22', ': ', array([20, 0, 58, 0]), ' ', array([ 0.25641026, 0. , 0.74358974, 0. ]), ' ', array([ 1., 0., 1., 0.])), ('RPE5W23', ': ', array([ 7, 0, 40, 0]), ' ', array([ 0.14893617, 0. , 0.85106383, 0. ]), ' ', array([ 0., 0., 1., 0.])), ('RPE5W24', ': ', array([11, 0, 43, 0]), ' ', array([ 0.2037037, 0. , 0.7962963, 0. ]), ' ', array([ 1., 0., 1., 0.])), ('RPE5W27', ': ', array([10, 0, 33…	1110000000000	0.992825	0.238168	0.999994	1
150	7	79181341	GAGxATT	G	C	[('RPE5W22', ': ', array([ 0, 0, 22, 63]), ' ', array([ 0. , 0. , 0.25882353, 0.74117647]), ' ', array([ 0., 0., 1., 1.])), ('RPE5W23', ': ', array([ 0, 0, 7, 26]), ' ', array([ 0. , 0. , 0.21212121, 0.78787879]), ' ', array([ 0., 0., 1., 1.])), ('RPE5W24', ': ', array([ 0, 1, 16, 41]), ' ', array([ 0. , 0.01724138, 0.27586207, 0.70689655]), ' ', array([ 0., 0., 1., 1.])), ('RPE5W27', ': ', array…	1110000000000	0.988759	0.289945	0.999996	1
151	7	86696880	AATxCTT	G	T	[('RPE5W22', ': ', array([ 0, 18, 0, 56]), ' ', array([ 0. , 0.24324324, 0. , 0.75675676]), ' ', array([ 0., 1., 0., 1.])), ('RPE5W23', ': ', array([ 0, 8, 0, 42]), ' ', array([ 0. , 0.16, 0. , 0.84]), ' ', array([ 0., 0., 0., 1.])), ('RPE5W24', ': ', array([ 0, 12, 0, 43]), ' ', array([ 0. , 0.21818182, 0. , 0.78181818]), ' ', array([ 0., 1., 0., 1.])), ('RPE5W27', ': ', array([ 0, 11, 1, 35]), …	1110000000000	0.989991	0.251248	0.999983	1
152	9	2474115	ATCxCTC	T	C	[('RPE5W22', ': ', array([ 0, 34, 16, 0]), ' ', array([ 0. , 0.68, 0.32, 0. ]), ' ', array([ 0., 1., 1., 0.])), ('RPE5W23', ': ', array([ 0, 14, 16, 0]), ' ', array([ 0. , 0.46666667, 0.53333333, 0. ]), ' ', array([ 0., 1., 1., 0.])), ('RPE5W24', ': ', array([ 0, 32, 11, 1]), ' ', array([ 0. , 0.72727273, 0.25 , 0.02272727]), ' ', array([ 0., 1., 1., 0.])), ('RPE5W27', ': ', array([ 1, 23, 8, 0])…	1110000000000	0.99426	0.274444	1	1
153	9	31416988	AAAxCTT	C	G	[('RPE5W22', ': ', array([ 0, 1, 35, 19]), ' ', array([ 0. , 0.01818182, 0.63636364, 0.34545455]), ' ', array([ 0., 0., 1., 1.])), ('RPE5W23', ': ', array([ 0, 0, 21, 14]), ' ', array([ 0. , 0. , 0.6, 0.4]), ' ', array([ 0., 0., 1., 1.])), ('RPE5W24', ': ', array([ 0, 0, 31, 13]), ' ', array([ 0. , 0. , 0.70454545, 0.29545455]), ' ', array([ 0., 0., 1., 1.])), ('RPE5W27', ': ', array([ 0, 0, 27, …	1110000000000	0.993421	0.320652	0.990038	1
154	10	78090559	ACTxTCT	A	G	[('RPE5W22', ': ', array([58, 0, 0, 16]), ' ', array([ 0.78378378, 0. , 0. , 0.21621622]), ' ', array([ 1., 0., 0., 1.])), ('RPE5W23', ': ', array([39, 0, 0, 13]), ' ', array([ 0.75, 0. , 0. , 0.25]), ' ', array([ 1., 0., 0., 1.])), ('RPE5W24', ': ', array([40, 0, 0, 15]), ' ', array([ 0.72727273, 0. , 0. , 0.27272727]), ' ', array([ 1., 0., 0., 1.])), ('RPE5W27', ': ', array([35, 0, 0, 17]), ' '…	1110000000000	0.992593	0.249421	0.999977	1
155	11	49031116	CAGxTAA	C	A	[('RPE5W22', ': ', array([11, 0, 45, 1]), ' ', array([ 0.19298246, 0. , 0.78947368, 0.01754386]), ' ', array([ 0., 0., 1., 0.])), ('RPE5W23', ': ', array([12, 0, 36, 0]), ' ', array([ 0.25, 0. , 0.75, 0. ]), ' ', array([ 1., 0., 1., 0.])), ('RPE5W24', ': ', array([10, 0, 40, 0]), ' ', array([ 0.2, 0. , 0.8, 0. ]), ' ', array([ 0., 0., 1., 0.])), ('RPE5W27', ': ', array([ 5, 0, 32, 0]), ' ', array…	1110000000000	0.99136	0.184355	0.999366	1
156	11	85577599	GGAxACG	G	A	[('RPE5W22', ': ', array([16, 0, 0, 52]), ' ', array([ 0.23529412, 0. , 0. , 0.76470588]), ' ', array([ 1., 0., 0., 1.])), ('RPE5W23', ': ', array([ 8, 0, 0, 53]), ' ', array([ 0.13114754, 0. , 0. , 0.86885246]), ' ', array([ 0., 0., 0., 1.])), ('RPE5W24', ': ', array([15, 0, 0, 41]), ' ', array([ 0.26785714, 0. , 0. , 0.73214286]), ' ', array([ 1., 0., 0., 1.])), ('RPE5W27', ': ', array([ 9, 0, …	1110000000000	0.991559	0.215788	0.999503	1
157	11	97637592	CCTxTTG	T	C	[('RPE5W22', ': ', array([ 0, 61, 17, 1]), ' ', array([ 0. , 0.7721519 , 0.21518987, 0.01265823]), ' ', array([ 0., 1., 1., 0.])), ('RPE5W23', ': ', array([ 0, 40, 13, 1]), ' ', array([ 0. , 0.74074074, 0.24074074, 0.01851852]), ' ', array([ 0., 1., 1., 0.])), ('RPE5W24', ': ', array([ 1, 41, 14, 1]), ' ', array([ 0.01754386, 0.71929825, 0.24561404, 0.01754386]), ' ', array([ 0., 1., 1., 0.])), (…	1110000000000	0.985781	0.272296	0.999978	1
158	12	40593212	ACTxTTG	G	A	[('RPE5W22', ': ', array([20, 0, 0, 43]), ' ', array([ 0.31746032, 0. , 0. , 0.68253968]), ' ', array([ 1., 0., 0., 1.])), ('RPE5W23', ': ', array([15, 2, 0, 42]), ' ', array([ 0.25423729, 0.03389831, 0. , 0.71186441]), ' ', array([ 1., 0., 0., 1.])), ('RPE5W24', ': ', array([17, 1, 0, 40]), ' ', array([ 0.29310345, 0.01724138, 0. , 0.68965517]), ' ', array([ 1., 0., 0., 1.])), ('RPE5W27', ': ', …	1110000000000	0.988103	0.281572	1	1
159	12	40593213	CTGxTGT	T	A	[('RPE5W22', ': ', array([20, 43, 0, 0]), ' ', array([ 0.31746032, 0.68253968, 0. , 0. ]), ' ', array([ 1., 1., 0., 0.])), ('RPE5W23', ': ', array([15, 45, 0, 0]), ' ', array([ 0.25, 0.75, 0. , 0. ]), ' ', array([ 1., 1., 0., 0.])), ('RPE5W24', ': ', array([17, 40, 0, 0]), ' ', array([ 0.29824561, 0.70175439, 0. , 0. ]), ' ', array([ 1., 1., 0., 0.])), ('RPE5W27', ': ', array([11, 35, 0, 0]), ' '…	1110000000000	0.991557	0.278926	0.999999	1
160	12	74955383	AATxTCA	C	A	[('RPE5W22', ': ', array([14, 0, 54, 0]), ' ', array([ 0.20588235, 0. , 0.79411765, 0. ]), ' ', array([ 1., 0., 1., 0.])), ('RPE5W23', ': ', array([10, 0, 37, 0]), ' ', array([ 0.21276596, 0. , 0.78723404, 0. ]), ' ', array([ 1., 0., 1., 0.])), ('RPE5W24', ': ', array([11, 0, 32, 0]), ' ', array([ 0.25581395, 0. , 0.74418605, 0. ]), ' ', array([ 1., 0., 1., 0.])), ('RPE5W27', ': ', array([12, 0, …	1110000000000	0.996951	0.245113	0.999972	1
161	12	85837663	GCAxTGA	A	G	[('RPE5W22', ': ', array([54, 0, 0, 22]), ' ', array([ 0.71052632, 0. , 0. , 0.28947368]), ' ', array([ 1., 0., 0., 1.])), ('RPE5W23', ': ', array([34, 0, 0, 14]), ' ', array([ 0.70833333, 0. , 0. , 0.29166667]), ' ', array([ 1., 0., 0., 1.])), ('RPE5W24', ': ', array([40, 0, 0, 9]), ' ', array([ 0.81632653, 0. , 0. , 0.18367347]), ' ', array([ 1., 0., 0., 0.])), ('RPE5W27', ': ', array([38, 0, 0…	1110000000000	0.99148	0.279319	1	1
162	13	29887525	AGCxCAT	A	T	[('RPE5W22', ': ', array([47, 14, 0, 0]), ' ', array([ 0.7704918, 0.2295082, 0. , 0. ]), ' ', array([ 1., 1., 0., 0.])), ('RPE5W23', ': ', array([29, 10, 0, 0]), ' ', array([ 0.74358974, 0.25641026, 0. , 0. ]), ' ', array([ 1., 1., 0., 0.])), ('RPE5W24', ': ', array([33, 12, 0, 0]), ' ', array([ 0.73333333, 0.26666667, 0. , 0. ]), ' ', array([ 1., 1., 0., 0.])), ('RPE5W27', ': ', array([25, 11, 1…	1110000000000	0.992851	0.260868	0.999915	1
163	13	43189482	ACAxTCT	G	C	[('RPE5W22', ': ', array([ 0, 1, 12, 26]), ' ', array([ 0. , 0.02564103, 0.30769231, 0.66666667]), ' ', array([ 0., 0., 1., 1.])), ('RPE5W23', ': ', array([ 0, 0, 10, 18]), ' ', array([ 0. , 0. , 0.35714286, 0.64285714]), ' ', array([ 0., 0., 1., 1.])), ('RPE5W24', ': ', array([ 0, 0, 15, 22]), ' ', array([ 0. , 0. , 0.40540541, 0.59459459]), ' ', array([ 0., 0., 1., 1.])), ('RPE5W27', ': ', arra…	1110000000000	0.990192	0.374668	0.999999	1
164	13	65151811	GTTxTAT	A	T	[('RPE5W22', ': ', array([25, 11, 0, 0]), ' ', array([ 0.69444444, 0.30555556, 0. , 0. ]), ' ', array([ 1., 1., 0., 0.])), ('RPE5W23', ': ', array([22, 9, 0, 0]), ' ', array([ 0.70967742, 0.29032258, 0. , 0. ]), ' ', array([ 1., 1., 0., 0.])), ('RPE5W24', ': ', array([25, 18, 0, 0]), ' ', array([ 0.58139535, 0.41860465, 0. , 0. ]), ' ', array([ 1., 1., 0., 0.])), ('RPE5W27', ': ', array([21, 9, 0…	1110000000000	0.997881	0.312492	0.999999	1
165	14	38170541	ATTxCAC	C	A	[('RPE5W22', ': ', array([13, 1, 34, 0]), ' ', array([ 0.27083333, 0.02083333, 0.70833333, 0. ]), ' ', array([ 1., 0., 1., 0.])), ('RPE5W23', ': ', array([11, 0, 23, 0]), ' ', array([ 0.32352941, 0. , 0.67647059, 0. ]), ' ', array([ 1., 0., 1., 0.])), ('RPE5W24', ': ', array([18, 0, 22, 0]), ' ', array([ 0.45, 0. , 0.55, 0. ]), ' ', array([ 1., 0., 1., 0.])), ('RPE5W27', ': ', array([10, 0, 24, 0…	1110000000000	0.991667	0.329495	0.999692	1
166	15	97370097	TTTxCTG	G	T	[('RPE5W22', ': ', array([ 0, 18, 0, 39]), ' ', array([ 0. , 0.31578947, 0. , 0.68421053]), ' ', array([ 0., 1., 0., 1.])), ('RPE5W23', ': ', array([ 1, 7, 0, 23]), ' ', array([ 0.03225806, 0.22580645, 0. , 0.74193548]), ' ', array([ 0., 1., 0., 1.])), ('RPE5W24', ': ', array([ 0, 13, 0, 34]), ' ', array([ 0. , 0.27659574, 0. , 0.72340426]), ' ', array([ 0., 1., 0., 1.])), ('RPE5W27', ': ', array…	1110000000000	0.997596	0.305191	0.999996	1
167	17	13809560	CAGxCAA	C	A	[('RPE5W22', ': ', array([13, 0, 30, 0]), ' ', array([ 0.30232558, 0. , 0.69767442, 0. ]), ' ', array([ 1., 0., 1., 0.])), ('RPE5W23', ': ', array([ 7, 0, 21, 0]), ' ', array([ 0.25, 0. , 0.75, 0. ]), ' ', array([ 1., 0., 1., 0.])), ('RPE5W24', ': ', array([16, 0, 27, 0]), ' ', array([ 0.37209302, 0. , 0.62790698, 0. ]), ' ', array([ 1., 0., 1., 0.])), ('RPE5W27', ': ', array([12, 0, 30, 1]), ' '…	1110000000000	0.996212	0.298372	0.999988	1
168	17	69420020	CATxTCT	G	T	[('RPE5W22', ': ', array([ 0, 11, 0, 31]), ' ', array([ 0. , 0.26190476, 0. , 0.73809524]), ' ', array([ 0., 1., 0., 1.])), ('RPE5W23', ': ', array([ 0, 16, 1, 32]), ' ', array([ 0. , 0.32653061, 0.02040816, 0.65306122]), ' ', array([ 0., 1., 0., 1.])), ('RPE5W24', ': ', array([ 0, 13, 1, 25]), ' ', array([ 0. , 0.33333333, 0.02564103, 0.64102564]), ' ', array([ 0., 1., 0., 1.])), ('RPE5W27', ': …	1110000000000	0.986579	0.313063	0.999993	1
169	18	24292478	TCAxATC	G	T	[('RPE5W22', ': ', array([ 0, 11, 0, 25]), ' ', array([ 0. , 0.30555556, 0. , 0.69444444]), ' ', array([ 0., 1., 0., 1.])), ('RPE5W23', ': ', array([ 0, 16, 0, 13]), ' ', array([ 0. , 0.55172414, 0. , 0.44827586]), ' ', array([ 0., 1., 0., 1.])), ('RPE5W24', ': ', array([ 0, 15, 0, 14]), ' ', array([ 0. , 0.51724138, 0. , 0.48275862]), ' ', array([ 0., 1., 0., 1.])), ('RPE5W27', ': ', array([ 0, …	1110000000000	0.987356	0.493343	0.999992	1
170	18	25175846	AACxTTT	A	G	[('RPE5W22', ': ', array([16, 0, 0, 13]), ' ', array([ 0.55172414, 0. , 0. , 0.44827586]), ' ', array([ 1., 0., 0., 1.])), ('RPE5W23', ': ', array([16, 0, 0, 10]), ' ', array([ 0.61538462, 0. , 0. , 0.38461538]), ' ', array([ 1., 0., 0., 1.])), ('RPE5W24', ': ', array([15, 0, 0, 13]), ' ', array([ 0.53571429, 0. , 0. , 0.46428571]), ' ', array([ 1., 0., 0., 1.])), ('RPE5W27', ': ', array([10, 0, …	1110000000000	0.986477	0.466561	0.999942	1
171	19	17931368	GCTxAGG	G	A	[('RPE5W22', ': ', array([14, 0, 0, 34]), ' ', array([ 0.29166667, 0. , 0. , 0.70833333]), ' ', array([ 1., 0., 0., 1.])), ('RPE5W23', ': ', array([13, 0, 0, 23]), ' ', array([ 0.36111111, 0. , 0. , 0.63888889]), ' ', array([ 1., 0., 0., 1.])), ('RPE5W24', ': ', array([14, 0, 0, 21]), ' ', array([ 0.4, 0. , 0. , 0.6]), ' ', array([ 1., 0., 0., 1.])), ('RPE5W27', ': ', array([14, 0, 0, 20]), ' ', …	1110000000000	0.996429	0.34404	0.999999	1
172	20	10244141	CAGxACA	C	T	[('RPE5W22', ': ', array([ 0, 18, 46, 1]), ' ', array([ 0. , 0.27692308, 0.70769231, 0.01538462]), ' ', array([ 0., 1., 1., 0.])), ('RPE5W23', ': ', array([ 0, 7, 47, 0]), ' ', array([ 0. , 0.12962963, 0.87037037, 0. ]), ' ', array([ 0., 0., 1., 0.])), ('RPE5W24', ': ', array([ 0, 7, 38, 0]), ' ', array([ 0. , 0.15555556, 0.84444444, 0. ]), ' ', array([ 0., 0., 1., 0.])), ('RPE5W27', ': ', array(…	1110000000000	0.994306	0.223152	0.999933	1
173	20	30588506	AGAxTTC	C	A	[('RPE5W22', ': ', array([18, 0, 50, 0]), ' ', array([ 0.26470588, 0. , 0.73529412, 0. ]), ' ', array([ 1., 0., 1., 0.])), ('RPE5W23', ': ', array([10, 0, 31, 0]), ' ', array([ 0.24390244, 0. , 0.75609756, 0. ]), ' ', array([ 1., 0., 1., 0.])), ('RPE5W24', ': ', array([14, 0, 41, 0]), ' ', array([ 0.25454545, 0. , 0.74545455, 0. ]), ' ', array([ 1., 0., 1., 0.])), ('RPE5W27', ': ', array([17, 0, …	1110000000000	1	0.273273	0.999998	1
174	21	23380137	GACxCCA	T	A	[('RPE5W22', ': ', array([16, 24, 0, 0]), ' ', array([ 0.4, 0.6, 0. , 0. ]), ' ', array([ 1., 1., 0., 0.])), ('RPE5W23', ': ', array([14, 13, 1, 0]), ' ', array([ 0.5 , 0.46428571, 0.03571429, 0. ]), ' ', array([ 1., 1., 0., 0.])), ('RPE5W24', ': ', array([11, 21, 1, 0]), ' ', array([ 0.33333333, 0.63636364, 0.03030303, 0. ]), ' ', array([ 1., 1., 0., 0.])), ('RPE5W27', ': ', array([ 6, 16, 0, 0]…	1110000000000	0.949224	0.331515	0.999989	1
175	21	23380138	ACTxCAT	C	G	[('RPE5W22', ': ', array([ 0, 0, 24, 16]), ' ', array([ 0. , 0. , 0.6, 0.4]), ' ', array([ 0., 0., 1., 1.])), ('RPE5W23', ': ', array([ 0, 0, 15, 13]), ' ', array([ 0. , 0. , 0.53571429, 0.46428571]), ' ', array([ 0., 0., 1., 1.])), ('RPE5W24', ': ', array([ 0, 0, 24, 11]), ' ', array([ 0. , 0. , 0.68571429, 0.31428571]), ' ', array([ 0., 0., 1., 1.])), ('RPE5W27', ': ', array([ 0, 0, 16, 6]), ' …	1110000000000	0.996094	0.311568	0.999985	1
176	X	86275785	GAAxAAT	A	T	[('RPE5W22', ': ', array([37, 14, 0, 0]), ' ', array([ 0.7254902, 0.2745098, 0. , 0. ]), ' ', array([ 1., 1., 0., 0.])), ('RPE5W23', ': ', array([28, 11, 0, 0]), ' ', array([ 0.71794872, 0.28205128, 0. , 0. ]), ' ', array([ 1., 1., 0., 0.])), ('RPE5W24', ': ', array([16, 12, 0, 0]), ' ', array([ 0.57142857, 0.42857143, 0. , 0. ]), ' ', array([ 1., 1., 0., 0.])), ('RPE5W27', ': ', array([17, 12, 0…	1110000000000	0.99569	0.330648	0.999998	1
177	3	126028925	ACAxTGC	C	G	[('RPE5W22', ': ', array([ 0, 0, 30, 17]), ' ', array([ 0. , 0. , 0.63829787, 0.36170213]), ' ', array([ 0., 0., 1., 1.])), ('RPE5W23', ': ', array([ 0, 0, 28, 10]), ' ', array([ 0. , 0. , 0.73684211, 0.26315789]), ' ', array([ 0., 0., 1., 1.])), ('RPE5W24', ': ', array([ 0, 0, 29, 17]), ' ', array([ 0. , 0. , 0.63043478, 0.36956522]), ' ', array([ 0., 0., 1., 1.])), ('RPE5W27', ': ', array([ 0, …	1110000000000	1	0.357077	1	1
178	5	12094175	CTCxGCC	C	T	[('RPE5W22', ': ', array([ 0, 15, 47, 0]), ' ', array([ 0. , 0.24193548, 0.75806452, 0. ]), ' ', array([ 0., 1., 1., 0.])), ('RPE5W23', ': ', array([ 0, 18, 27, 0]), ' ', array([ 0. , 0.4, 0.6, 0. ]), ' ', array([ 0., 1., 1., 0.])), ('RPE5W24', ': ', array([ 0, 12, 42, 0]), ' ', array([ 0. , 0.22222222, 0.77777778, 0. ]), ' ', array([ 0., 1., 1., 0.])), ('RPE5W27', ': ', array([ 0, 12, 36, 0]), '…	1110000000000	0.991304	0.278128	0.999936	1
179	6	9640238	GGAxACG	G	A	[('RPE5W22', ': ', array([13, 0, 0, 34]), ' ', array([ 0.27659574, 0. , 0. , 0.72340426]), ' ', array([ 1., 0., 0., 1.])), ('RPE5W23', ': ', array([17, 0, 0, 31]), ' ', array([ 0.35416667, 0. , 0. , 0.64583333]), ' ', array([ 1., 0., 0., 1.])), ('RPE5W24', ': ', array([11, 0, 0, 28]), ' ', array([ 0.28205128, 0. , 0. , 0.71794872]), ' ', array([ 1., 0., 0., 1.])), ('RPE5W27', ': ', array([12, 0, …	1110000000000	0.98646	0.326166	1	1
180	7	146231316	ATAxAAT	A	T	[('RPE5W22', ': ', array([59, 19, 0, 0]), ' ', array([ 0.75641026, 0.24358974, 0. , 0. ]), ' ', array([ 1., 1., 0., 0.])), ('RPE5W23', ': ', array([31, 16, 1, 0]), ' ', array([ 0.64583333, 0.33333333, 0.02083333, 0. ]), ' ', array([ 1., 1., 0., 0.])), ('RPE5W24', ': ', array([36, 16, 0, 0]), ' ', array([ 0.69230769, 0.30769231, 0. , 0. ]), ' ', array([ 1., 1., 0., 0.])), ('RPE5W27', ': ', array([…	1110000000000	0.974429	0.291088	0.999995	1
181	8	51291653	GAAxTGC	C	G	[('RPE5W22', ': ', array([ 0, 0, 42, 15]), ' ', array([ 0. , 0. , 0.73684211, 0.26315789]), ' ', array([ 0., 0., 1., 1.])), ('RPE5W23', ': ', array([ 0, 0, 32, 8]), ' ', array([ 0. , 0. , 0.8, 0.2]), ' ', array([ 0., 0., 1., 0.])), ('RPE5W24', ': ', array([ 0, 0, 25, 12]), ' ', array([ 0. , 0. , 0.67567568, 0.32432432]), ' ', array([ 0., 0., 1., 1.])), ('RPE5W27', ': ', array([ 0, 0, 19, 14]), ' …	1110000000000	1	0.297294	1	1
182	11	696645	TGTxGGC	G	C	[('RPE5W22', ': ', array([ 0, 0, 16, 38]), ' ', array([ 0. , 0. , 0.2962963, 0.7037037]), ' ', array([ 0., 0., 1., 1.])), ('RPE5W23', ': ', array([ 0, 0, 14, 27]), ' ', array([ 0. , 0. , 0.34146341, 0.65853659]), ' ', array([ 0., 0., 1., 1.])), ('RPE5W24', ': ', array([ 0, 0, 8, 46]), ' ', array([ 0. , 0. , 0.14814815, 0.85185185]), ' ', array([ 0., 0., 0., 1.])), ('RPE5W27', ': ', array([ 0, 0, …	1110000000000	0.991634	0.212683	0.995537	1
183	18	37541681	GTGxGTT	A	C	[('RPE5W22', ': ', array([27, 0, 13, 0]), ' ', array([ 0.675, 0. , 0.325, 0. ]), ' ', array([ 1., 0., 1., 0.])), ('RPE5W23', ': ', array([14, 0, 14, 0]), ' ', array([ 0.5, 0. , 0.5, 0. ]), ' ', array([ 1., 0., 1., 0.])), ('RPE5W24', ': ', array([8, 0, 9, 0]), ' ', array([ 0.47058824, 0. , 0.52941176, 0. ]), ' ', array([ 1., 0., 1., 0.])), ('RPE5W27', ': ', array([15, 0, 10, 0]), ' ', array([ 0.6,…	1110000000000	1	0.443474	0.999919	1
184	X	3224421	GCAxAAG	G	T	[('RPE5W22', ': ', array([ 0, 23, 0, 36]), ' ', array([ 0. , 0.38983051, 0. , 0.61016949]), ' ', array([ 0., 1., 0., 1.])), ('RPE5W23', ': ', array([ 0, 17, 0, 23]), ' ', array([ 0. , 0.425, 0. , 0.575]), ' ', array([ 0., 1., 0., 1.])), ('RPE5W24', ': ', array([ 1, 12, 0, 32]), ' ', array([ 0.02222222, 0.26666667, 0. , 0.71111111]), ' ', array([ 0., 1., 0., 1.])), ('RPE5W27', ': ', array([ 0, 14,…	1110000000000	0.995122	0.310815	0.99965	1
185	X	43294411	TGCxTTG	C	A	[('RPE5W22', ': ', array([15, 0, 34, 0]), ' ', array([ 0.30612245, 0. , 0.69387755, 0. ]), ' ', array([ 1., 0., 1., 0.])), ('RPE5W23', ': ', array([17, 0, 24, 0]), ' ', array([ 0.41463415, 0. , 0.58536585, 0. ]), ' ', array([ 1., 0., 1., 0.])), ('RPE5W24', ': ', array([10, 0, 23, 0]), ' ', array([ 0.3030303, 0. , 0.6969697, 0. ]), ' ', array([ 1., 0., 1., 0.])), ('RPE5W27', ': ', array([13, 0, 16…	1110000000000	0.988403	0.379346	1	1
186	X	114354956	CATxTAT	T	G	[('RPE5W22', ': ', array([ 1, 50, 0, 11]), ' ', array([ 0.01612903, 0.80645161, 0. , 0.17741935]), ' ', array([ 0., 1., 0., 0.])), ('RPE5W23', ': ', array([ 0, 42, 0, 16]), ' ', array([ 0. , 0.72413793, 0. , 0.27586207]), ' ', array([ 0., 1., 0., 1.])), ('RPE5W24', ': ', array([ 0, 24, 1, 10]), ' ', array([ 0. , 0.68571429, 0.02857143, 0.28571429]), ' ', array([ 0., 1., 0., 1.])), ('RPE5W27', ': …	1110000000000	0.971061	0.291321	0.999864	1
187	X	139130977	TTTxCCC	C	T	[('RPE5W22', ': ', array([ 1, 19, 29, 0]), ' ', array([ 0.02040816, 0.3877551 , 0.59183673, 0. ]), ' ', array([ 0., 1., 1., 0.])), ('RPE5W23', ': ', array([ 0, 14, 34, 0]), ' ', array([ 0. , 0.29166667, 0.70833333, 0. ]), ' ', array([ 0., 1., 1., 0.])), ('RPE5W24', ': ', array([ 0, 4, 24, 0]), ' ', array([ 0. , 0.14285714, 0.85714286, 0. ]), ' ', array([ 0., 0., 1., 0.])), ('RPE5W27', ': ', array…	1110000000000	1	0.306854	0.992948	1
188	9	121164922	ATAxATG	G	T	[('RPE5W22', ': ', array([ 0, 35, 0, 29]), ' ', array([ 0. , 0.546875, 0. , 0.453125]), ' ', array([ 0., 1., 0., 1.])), ('RPE5W23', ': ', array([ 0, 23, 0, 21]), ' ', array([ 0. , 0.52272727, 0. , 0.47727273]), ' ', array([ 0., 1., 0., 1.])), ('RPE5W24', ': ', array([ 0, 1, 0, 40]), ' ', array([ 0. , 0.02439024, 0. , 0.97560976]), ' ', array([ 0., 0., 0., 1.])), ('RPE5W27', ': ', array([ 0, 7, 0,…	1100000000000	0.873283	0.547631	0.999998	1
189	2	237111191	ATGxAGT	C	A	[('RPE5W22', ': ', array([12, 0, 38, 0]), ' ', array([ 0.24, 0. , 0.76, 0. ]), ' ', array([ 1., 0., 1., 0.])), ('RPE5W23', ': ', array([12, 0, 26, 0]), ' ', array([ 0.31578947, 0. , 0.68421053, 0. ]), ' ', array([ 1., 0., 1., 0.])), ('RPE5W24', ': ', array([12, 0, 34, 0]), ' ', array([ 0.26086957, 0. , 0.73913043, 0. ]), ' ', array([ 1., 0., 1., 0.])), ('RPE5W27', ': ', array([15, 0, 25, 0]), ' '…	1110000000000	0.994737	0.30844	0.999999	1
190	1	6371006	GGCxAGG	C	A	[('RPE5W22', ': ', array([ 0, 0, 46, 0]), ' ', array([ 0., 0., 1., 0.]), ' ', array([ 0., 0., 1., 0.])), ('RPE5W23', ': ', array([ 0, 0, 26, 0]), ' ', array([ 0., 0., 1., 0.]), ' ', array([ 0., 0., 1., 0.])), ('RPE5W24', ': ', array([12, 0, 25, 0]), ' ', array([ 0.32432432, 0. , 0.67567568, 0. ]), ' ', array([ 1., 0., 1., 0.])), ('RPE5W27', ': ', array([12, 0, 32, 1]), ' ', array([ 0.26666667, 0.…	11000000000	1	0.295495	0.999579	1
191	1	55588955	CTTxAGA	C	A	[('RPE5W22', ': ', array([ 0, 0, 51, 0]), ' ', array([ 0., 0., 1., 0.]), ' ', array([ 0., 0., 1., 0.])), ('RPE5W23', ': ', array([ 0, 0, 31, 0]), ' ', array([ 0., 0., 1., 0.]), ' ', array([ 0., 0., 1., 0.])), ('RPE5W24', ': ', array([11, 0, 31, 0]), ' ', array([ 0.26190476, 0. , 0.73809524, 0. ]), ' ', array([ 1., 0., 1., 0.])), ('RPE5W27', ': ', array([20, 0, 29, 0]), ' ', array([ 0.40816327, 0.…	11000000000	0.997778	0.335034	0.999998	1
192	1	97086656	CAAxGGT	G	C	[('RPE5W22', ': ', array([ 0, 0, 0, 61]), ' ', array([ 0., 0., 0., 1.]), ' ', array([ 0., 0., 0., 1.])), ('RPE5W23', ': ', array([ 0, 0, 0, 32]), ' ', array([ 0., 0., 0., 1.]), ' ', array([ 0., 0., 0., 1.])), ('RPE5W24', ': ', array([ 0, 0, 13, 21]), ' ', array([ 0. , 0. , 0.38235294, 0.61764706]), ' ', array([ 0., 0., 1., 1.])), ('RPE5W27', ': ', array([ 0, 0, 12, 23]), ' ', array([ 0. , 0. , 0.…	11000000000	0.993797	0.362605	1	1
193	1	143411967	TGCxACA	C	A	[('RPE5W22', ': ', array([ 0, 0, 117, 0]), ' ', array([ 0., 0., 1., 0.]), ' ', array([ 0., 0., 1., 0.])), ('RPE5W23', ': ', array([ 0, 0, 104, 1]), ' ', array([ 0. , 0. , 0.99047619, 0.00952381]), ' ', array([ 0., 0., 1., 0.])), ('RPE5W24', ': ', array([12, 0, 98, 2]), ' ', array([ 0.10714286, 0. , 0.875 , 0.01785714]), ' ', array([ 0., 0., 1., 0.])), ('RPE5W27', ': ', array([19, 0, 92, 0]), ' ',…	11000000000	0.994621	0.139157	0.999997	1
194	1	176057448	ACTxAAT	G	A	[('RPE5W22', ': ', array([ 0, 0, 0, 44]), ' ', array([ 0., 0., 0., 1.]), ' ', array([ 0., 0., 0., 1.])), ('RPE5W23', ': ', array([ 1, 0, 0, 29]), ' ', array([ 0.03333333, 0. , 0. , 0.96666667]), ' ', array([ 0., 0., 0., 1.])), ('RPE5W24', ': ', array([12, 0, 0, 36]), ' ', array([ 0.25, 0. , 0. , 0.75]), ' ', array([ 1., 0., 0., 1.])), ('RPE5W27', ': ', array([ 9, 0, 0, 18]), ' ', array([ 0.333333…	11000000000	0.980489	0.291667	0.999947	1
195	1	213671114	TTCxAAA	C	T	[('RPE5W22', ': ', array([ 0, 0, 47, 0]), ' ', array([ 0., 0., 1., 0.]), ' ', array([ 0., 0., 1., 0.])), ('RPE5W23', ': ', array([ 0, 0, 35, 0]), ' ', array([ 0., 0., 1., 0.]), ' ', array([ 0., 0., 1., 0.])), ('RPE5W24', ': ', array([ 0, 16, 27, 0]), ' ', array([ 0. , 0.37209302, 0.62790698, 0. ]), ' ', array([ 0., 1., 1., 0.])), ('RPE5W27', ': ', array([ 0, 12, 27, 0]), ' ', array([ 0. , 0.30769…	11000000000	0.987123	0.339893	0.999988	1
196	2	22248376	CATxTAA	C	A	[('RPE5W22', ': ', array([ 0, 0, 47, 0]), ' ', array([ 0., 0., 1., 0.]), ' ', array([ 0., 0., 1., 0.])), ('RPE5W23', ': ', array([ 0, 0, 45, 0]), ' ', array([ 0., 0., 1., 0.]), ' ', array([ 0., 0., 1., 0.])), ('RPE5W24', ': ', array([ 8, 0, 24, 0]), ' ', array([ 0.25, 0. , 0.75, 0. ]), ' ', array([ 1., 0., 1., 0.])), ('RPE5W27', ': ', array([10, 0, 30, 0]), ' ', array([ 0.25, 0. , 0.75, 0. ]), ' …	11000000000	0.992535	0.25	0.999901	1
197	2	50720446	GAAxAAA	A	T	[('RPE5W22', ': ', array([53, 0, 0, 0]), ' ', array([ 1., 0., 0., 0.]), ' ', array([ 1., 0., 0., 0.])), ('RPE5W23', ': ', array([43, 0, 0, 0]), ' ', array([ 1., 0., 0., 0.]), ' ', array([ 1., 0., 0., 0.])), ('RPE5W24', ': ', array([24, 8, 0, 0]), ' ', array([ 0.75, 0.25, 0. , 0. ]), ' ', array([ 1., 1., 0., 0.])), ('RPE5W27', ': ', array([15, 16, 0, 0]), ' ', array([ 0.48387097, 0.51612903, 0. , …	11000000000	0.992012	0.383065	0.999986	1
198	2	112350508	AATxTTC	G	T	[('RPE5W22', ': ', array([ 0, 0, 0, 92]), ' ', array([ 0., 0., 0., 1.]), ' ', array([ 0., 0., 0., 1.])), ('RPE5W23', ': ', array([ 0, 1, 0, 75]), ' ', array([ 0. , 0.01315789, 0. , 0.98684211]), ' ', array([ 0., 0., 0., 1.])), ('RPE5W24', ': ', array([ 0, 12, 0, 51]), ' ', array([ 0. , 0.19047619, 0. , 0.80952381]), ' ', array([ 0., 0., 0., 1.])), ('RPE5W27', ': ', array([ 0, 12, 0, 60]), ' ', ar…	11000000000	0.996991	0.178571	0.999999	1
199	2	127073774	AATxATT	G	T	[('RPE5W22', ': ', array([ 0, 0, 0, 47]), ' ', array([ 0., 0., 0., 1.]), ' ', array([ 0., 0., 0., 1.])), ('RPE5W23', ': ', array([ 0, 0, 0, 34]), ' ', array([ 0., 0., 0., 1.]), ' ', array([ 0., 0., 0., 1.])), ('RPE5W24', ': ', array([ 0, 17, 0, 32]), ' ', array([ 0. , 0.34693878, 0. , 0.65306122]), ' ', array([ 0., 1., 0., 1.])), ('RPE5W27', ': ', array([ 0, 13, 0, 18]), ' ', array([ 0. , 0.41935…	11000000000	0.995505	0.383147	1	1
200	2	142121674	TATxATC	A	T	[('RPE5W22', ': ', array([58, 0, 0, 0]), ' ', array([ 1., 0., 0., 0.]), ' ', array([ 1., 0., 0., 0.])), ('RPE5W23', ': ', array([29, 0, 1, 0]), ' ', array([ 0.96666667, 0. , 0.03333333, 0. ]), ' ', array([ 1., 0., 0., 0.])), ('RPE5W24', ': ', array([22, 11, 0, 0]), ' ', array([ 0.66666667, 0.33333333, 0. , 0. ]), ' ', array([ 1., 1., 0., 0.])), ('RPE5W27', ': ', array([22, 15, 0, 1]), ' ', array(…	11000000000	0.994916	0.364035	1	1
201	2	150013667	GATxCTT	C	A	[('RPE5W22', ': ', array([ 0, 0, 45, 0]), ' ', array([ 0., 0., 1., 0.]), ' ', array([ 0., 0., 1., 0.])), ('RPE5W23', ': ', array([ 0, 0, 30, 0]), ' ', array([ 0., 0., 1., 0.]), ' ', array([ 0., 0., 1., 0.])), ('RPE5W24', ': ', array([ 9, 0, 20, 1]), ' ', array([ 0.3 , 0. , 0.66666667, 0.03333333]), ' ', array([ 1., 0., 1., 0.])), ('RPE5W27', ': ', array([17, 0, 23, 0]), ' ', array([ 0.425, 0. , 0…	11000000000	0.995146	0.3625	0.999998	1
202	2	214697401	TTCxCCT	C	T	[('RPE5W22', ': ', array([ 0, 1, 63, 0]), ' ', array([ 0. , 0.015625, 0.984375, 0. ]), ' ', array([ 0., 0., 1., 0.])), ('RPE5W23', ': ', array([ 0, 0, 43, 0]), ' ', array([ 0., 0., 1., 0.]), ' ', array([ 0., 0., 1., 0.])), ('RPE5W24', ': ', array([ 0, 13, 20, 0]), ' ', array([ 0. , 0.39393939, 0.60606061, 0. ]), ' ', array([ 0., 1., 1., 0.])), ('RPE5W27', ': ', array([ 0, 12, 26, 0]), ' ', array(…	11000000000	0.989713	0.354864	0.999995	1
203	2	216477506	TTCxTTT	C	A	[('RPE5W22', ': ', array([ 0, 0, 43, 0]), ' ', array([ 0., 0., 1., 0.]), ' ', array([ 0., 0., 1., 0.])), ('RPE5W23', ': ', array([ 0, 0, 32, 0]), ' ', array([ 0., 0., 1., 0.]), ' ', array([ 0., 0., 1., 0.])), ('RPE5W24', ': ', array([17, 0, 24, 0]), ' ', array([ 0.41463415, 0. , 0.58536585, 0. ]), ' ', array([ 1., 0., 1., 0.])), ('RPE5W27', ': ', array([12, 0, 29, 0]), ' ', array([ 0.29268293, 0.…	11000000000	0.991087	0.353659	1	1
204	2	241947989	GACxAGG	C	A	[('RPE5W22', ': ', array([ 0, 0, 61, 0]), ' ', array([ 0., 0., 1., 0.]), ' ', array([ 0., 0., 1., 0.])), ('RPE5W23', ': ', array([ 0, 0, 47, 0]), ' ', array([ 0., 0., 1., 0.]), ' ', array([ 0., 0., 1., 0.])), ('RPE5W24', ': ', array([16, 0, 27, 1]), ' ', array([ 0.36363636, 0. , 0.61363636, 0.02272727]), ' ', array([ 1., 0., 1., 0.])), ('RPE5W27', ': ', array([16, 0, 27, 0]), ' ', array([ 0.37209…	11000000000	0.995694	0.367865	1	1
205	3	20268505	GCCxGAC	A	G	[('RPE5W22', ': ', array([50, 0, 0, 0]), ' ', array([ 1., 0., 0., 0.]), ' ', array([ 1., 0., 0., 0.])), ('RPE5W23', ': ', array([35, 0, 0, 0]), ' ', array([ 1., 0., 0., 0.]), ' ', array([ 1., 0., 0., 0.])), ('RPE5W24', ': ', array([21, 0, 1, 13]), ' ', array([ 0.6 , 0. , 0.02857143, 0.37142857]), ' ', array([ 1., 0., 0., 1.])), ('RPE5W27', ': ', array([20, 1, 0, 12]), ' ', array([ 0.60606061, 0.0…	11000000000	0.994393	0.367532	1	1
206	3	27944341	GCTxACT	G	T	[('RPE5W22', ': ', array([ 0, 0, 1, 46]), ' ', array([ 0. , 0. , 0.0212766, 0.9787234]), ' ', array([ 0., 0., 0., 1.])), ('RPE5W23', ': ', array([ 0, 0, 0, 33]), ' ', array([ 0., 0., 0., 1.]), ' ', array([ 0., 0., 0., 1.])), ('RPE5W24', ': ', array([ 0, 14, 0, 28]), ' ', array([ 0. , 0.33333333, 0. , 0.66666667]), ' ', array([ 0., 1., 0., 1.])), ('RPE5W27', ': ', array([ 0, 11, 0, 23]), ' ', arra…	11000000000	0.988914	0.328431	0.999993	1
207	3	27944575	TCAxTGA	A	G	[('RPE5W22', ': ', array([43, 0, 0, 0]), ' ', array([ 1., 0., 0., 0.]), ' ', array([ 1., 0., 0., 0.])), ('RPE5W23', ': ', array([36, 0, 0, 1]), ' ', array([ 0.97297297, 0. , 0. , 0.02702703]), ' ', array([ 1., 0., 0., 0.])), ('RPE5W24', ': ', array([22, 0, 0, 14]), ' ', array([ 0.61111111, 0. , 0. , 0.38888889]), ' ', array([ 1., 0., 0., 1.])), ('RPE5W27', ': ', array([28, 1, 0, 20]), ' ', array(…	11000000000	0.99697	0.398526	1	1
208	3	78297950	CCCxTCT	C	A	[('RPE5W22', ': ', array([ 0, 0, 48, 0]), ' ', array([ 0., 0., 1., 0.]), ' ', array([ 0., 0., 1., 0.])), ('RPE5W23', ': ', array([ 0, 0, 47, 0]), ' ', array([ 0., 0., 1., 0.]), ' ', array([ 0., 0., 1., 0.])), ('RPE5W24', ': ', array([17, 0, 18, 0]), ' ', array([ 0.48571429, 0. , 0.51428571, 0. ]), ' ', array([ 1., 0., 1., 0.])), ('RPE5W27', ': ', array([ 7, 0, 20, 0]), ' ', array([ 0.25925926, 0.…	11000000000	0.994018	0.372487	1	1
209	3	85834730	AGTxTAC	T	A	[('RPE5W22', ': ', array([ 0, 38, 0, 0]), ' ', array([ 0., 1., 0., 0.]), ' ', array([ 0., 1., 0., 0.])), ('RPE5W23', ': ', array([ 0, 35, 0, 0]), ' ', array([ 0., 1., 0., 0.]), ' ', array([ 0., 1., 0., 0.])), ('RPE5W24', ': ', array([ 9, 29, 0, 0]), ' ', array([ 0.23684211, 0.76315789, 0. , 0. ]), ' ', array([ 1., 1., 0., 0.])), ('RPE5W27', ': ', array([ 9, 33, 0, 0]), ' ', array([ 0.21428571, 0.…	11000000000	0.986649	0.225564	0.990196	1
210	3	153713348	GGAxTAA	G	T	[('RPE5W22', ': ', array([ 0, 0, 0, 43]), ' ', array([ 0., 0., 0., 1.]), ' ', array([ 0., 0., 0., 1.])), ('RPE5W23', ': ', array([ 0, 0, 0, 39]), ' ', array([ 0., 0., 0., 1.]), ' ', array([ 0., 0., 0., 1.])), ('RPE5W24', ': ', array([ 0, 7, 0, 31]), ' ', array([ 0. , 0.18421053, 0. , 0.81578947]), ' ', array([ 0., 0., 0., 1.])), ('RPE5W27', ': ', array([ 0, 11, 0, 17]), ' ', array([ 0. , 0.392857…	11000000000	0.996875	0.288534	0.999894	1
211	3	155595845	CATxAGC	G	T	[('RPE5W22', ': ', array([ 0, 0, 0, 47]), ' ', array([ 0., 0., 0., 1.]), ' ', array([ 0., 0., 0., 1.])), ('RPE5W23', ': ', array([ 0, 0, 0, 37]), ' ', array([ 0., 0., 0., 1.]), ' ', array([ 0., 0., 0., 1.])), ('RPE5W24', ': ', array([ 0, 10, 0, 19]), ' ', array([ 0. , 0.34482759, 0. , 0.65517241]), ' ', array([ 0., 1., 0., 1.])), ('RPE5W27', ': ', array([ 0, 13, 0, 23]), ' ', array([ 0. , 0.36111…	11000000000	0.994841	0.352969	1	1
212	4	8134963	CCGxAAT	C	A	[('RPE5W22', ': ', array([ 0, 0, 47, 0]), ' ', array([ 0., 0., 1., 0.]), ' ', array([ 0., 0., 1., 0.])), ('RPE5W23', ': ', array([ 0, 0, 39, 0]), ' ', array([ 0., 0., 1., 0.]), ' ', array([ 0., 0., 1., 0.])), ('RPE5W24', ': ', array([15, 0, 28, 0]), ' ', array([ 0.34883721, 0. , 0.65116279, 0. ]), ' ', array([ 1., 0., 1., 0.])), ('RPE5W27', ': ', array([13, 0, 23, 0]), ' ', array([ 0.36111111, 0.…	11000000000	0.997297	0.354974	1	1
213	4	125181534	CCGxGTA	G	A	[('RPE5W22', ': ', array([ 0, 0, 1, 69]), ' ', array([ 0. , 0. , 0.01408451, 0.97183099]), ' ', array([ 0., 0., 0., 1.])), ('RPE5W23', ': ', array([ 0, 0, 0, 26]), ' ', array([ 0., 0., 0., 1.]), ' ', array([ 0., 0., 0., 1.])), ('RPE5W24', ': ', array([14, 0, 0, 24]), ' ', array([ 0.36842105, 0. , 0. , 0.63157895]), ' ', array([ 1., 0., 0., 1.])), ('RPE5W27', ': ', array([11, 0, 0, 27]), ' ', arra…	11000000000	0.994005	0.328947	0.999989	1
214	4	137867625	GCAxGCT	G	A	[('RPE5W22', ': ', array([ 0, 0, 1, 44]), ' ', array([ 0. , 0. , 0.02222222, 0.97777778]), ' ', array([ 0., 0., 0., 1.])), ('RPE5W23', ': ', array([ 0, 0, 0, 27]), ' ', array([ 0., 0., 0., 1.]), ' ', array([ 0., 0., 0., 1.])), ('RPE5W24', ': ', array([ 0, 0, 16, 23]), ' ', array([ 0. , 0. , 0.41025641, 0.58974359]), ' ', array([ 0., 0., 1., 1.])), ('RPE5W27', ': ', array([13, 0, 0, 16]), ' ', arr…	11000000000	0.990996	0.224138	0.999995	1
215	5	5283016	AGTxATT	T	G	[('RPE5W22', ': ', array([ 0, 72, 0, 1]), ' ', array([ 0. , 0.98630137, 0. , 0.01369863]), ' ', array([ 0., 1., 0., 0.])), ('RPE5W23', ': ', array([ 0, 48, 0, 0]), ' ', array([ 0., 1., 0., 0.]), ' ', array([ 0., 1., 0., 0.])), ('RPE5W24', ': ', array([ 0, 27, 0, 15]), ' ', array([ 0. , 0.64285714, 0. , 0.35714286]), ' ', array([ 0., 1., 0., 1.])), ('RPE5W27', ': ', array([ 0, 48, 0, 11]), ' ', ar…	11000000000	0.992269	0.271792	0.999999	1
216	5	14999303	AAAxTGT	G	T	[('RPE5W22', ': ', array([ 0, 0, 1, 58]), ' ', array([ 0. , 0. , 0.01694915, 0.98305085]), ' ', array([ 0., 0., 0., 1.])), ('RPE5W23', ': ', array([ 0, 0, 0, 50]), ' ', array([ 0., 0., 0., 1.]), ' ', array([ 0., 0., 0., 1.])), ('RPE5W24', ': ', array([ 0, 16, 0, 42]), ' ', array([ 0. , 0.27586207, 0. , 0.72413793]), ' ', array([ 0., 1., 0., 1.])), ('RPE5W27', ': ', array([ 6, 11, 0, 34]), ' ', ar…	11000000000	0.992639	0.245774	0.999999	1
217	5	29185918	CTTxTTG	C	G	[('RPE5W22', ': ', array([ 0, 0, 73, 0]), ' ', array([ 0. , 0. , 0.98648649, 0. ]), ' ', array([ 0., 0., 1., 0.])), ('RPE5W23', ': ', array([ 0, 0, 44, 0]), ' ', array([ 0., 0., 1., 0.]), ' ', array([ 0., 0., 1., 0.])), ('RPE5W24', ': ', array([ 0, 0, 37, 13]), ' ', array([ 0. , 0. , 0.74, 0.26]), ' ', array([ 0., 0., 1., 1.])), ('RPE5W27', ': ', array([ 0, 0, 38, 13]), ' ', array([ 0. , 0. , 0.7…	11000000000	0.997674	0.257451	0.999999	1
218	5	37202581	TGAxAGT	T	C	[('RPE5W22', ': ', array([ 0, 73, 1, 0]), ' ', array([ 0. , 0.98648649, 0.01351351, 0. ]), ' ', array([ 0., 1., 0., 0.])), ('RPE5W23', ': ', array([ 0, 56, 0, 0]), ' ', array([ 0., 1., 0., 0.]), ' ', array([ 0., 1., 0., 0.])), ('RPE5W24', ': ', array([ 0, 42, 22, 0]), ' ', array([ 0. , 0.65625, 0.34375, 0. ]), ' ', array([ 0., 1., 1., 0.])), ('RPE5W27', ': ', array([ 0, 33, 11, 1]), ' ', array([ …	11000000000	0.992238	0.294097	0.999896	1
219	5	75296042	TAAxTTC	C	T	[('RPE5W22', ': ', array([ 0, 1, 92, 0]), ' ', array([ 0. , 0.01075269, 0.98924731, 0. ]), ' ', array([ 0., 0., 1., 0.])), ('RPE5W23', ': ', array([ 0, 0, 31, 0]), ' ', array([ 0., 0., 1., 0.]), ' ', array([ 0., 0., 1., 0.])), ('RPE5W24', ': ', array([ 0, 6, 41, 0]), ' ', array([ 0. , 0.12765957, 0.87234043, 0. ]), ' ', array([ 0., 0., 1., 0.])), ('RPE5W27', ': ', array([ 0, 12, 40, 0]), ' ', arr…	11000000000	0.998925	0.179214	0.997984	1
220	5	79660470	GCAxACT	C	A	[('RPE5W22', ': ', array([ 0, 0, 80, 0]), ' ', array([ 0., 0., 1., 0.]), ' ', array([ 0., 0., 1., 0.])), ('RPE5W23', ': ', array([ 0, 0, 63, 0]), ' ', array([ 0., 0., 1., 0.]), ' ', array([ 0., 0., 1., 0.])), ('RPE5W24', ': ', array([ 9, 0, 42, 0]), ' ', array([ 0.17647059, 0. , 0.82352941, 0. ]), ' ', array([ 0., 0., 1., 0.])), ('RPE5W27', ': ', array([ 8, 0, 38, 0]), ' ', array([ 0.17391304, 0.…	11000000000	0.99165	0.175192	0.999896	1
221	5	89185047	AGAxAAA	G	C	[('RPE5W22', ': ', array([ 0, 0, 0, 66]), ' ', array([ 0., 0., 0., 1.]), ' ', array([ 0., 0., 0., 1.])), ('RPE5W23', ': ', array([ 0, 0, 0, 38]), ' ', array([ 0., 0., 0., 1.]), ' ', array([ 0., 0., 0., 1.])), ('RPE5W24', ': ', array([ 0, 0, 18, 45]), ' ', array([ 0. , 0. , 0.28571429, 0.71428571]), ' ', array([ 0., 0., 1., 1.])), ('RPE5W27', ': ', array([ 0, 0, 22, 41]), ' ', array([ 0. , 0. , 0.…	11000000000	0.993152	0.31746	1	1
222	5	89548371	TTTxGCT	G	T	[('RPE5W22', ': ', array([ 0, 0, 0, 62]), ' ', array([ 0., 0., 0., 1.]), ' ', array([ 0., 0., 0., 1.])), ('RPE5W23', ': ', array([ 0, 0, 0, 53]), ' ', array([ 0., 0., 0., 1.]), ' ', array([ 0., 0., 0., 1.])), ('RPE5W24', ': ', array([ 0, 12, 0, 36]), ' ', array([ 0. , 0.25, 0. , 0.75]), ' ', array([ 0., 1., 0., 1.])), ('RPE5W27', ': ', array([ 0, 9, 0, 33]), ' ', array([ 0. , 0.21428571, 0. , 0.7…	11000000000	0.993198	0.232143	0.999955	1
223	5	116684923	AAAxAGA	C	G	[('RPE5W22', ': ', array([ 0, 0, 52, 0]), ' ', array([ 0., 0., 1., 0.]), ' ', array([ 0., 0., 1., 0.])), ('RPE5W23', ': ', array([ 0, 0, 41, 0]), ' ', array([ 0., 0., 1., 0.]), ' ', array([ 0., 0., 1., 0.])), ('RPE5W24', ': ', array([ 1, 0, 46, 18]), ' ', array([ 0.01538462, 0. , 0.70769231, 0.27692308]), ' ', array([ 0., 0., 1., 1.])), ('RPE5W27', ': ', array([ 0, 0, 36, 10]), ' ', array([ 0. , …	11000000000	0.986636	0.247157	0.99997	1
224	5	120853984	TTTxTTT	G	A	[('RPE5W22', ': ', array([ 0, 0, 0, 52]), ' ', array([ 0., 0., 0., 1.]), ' ', array([ 0., 0., 0., 1.])), ('RPE5W23', ': ', array([ 0, 0, 1, 63]), ' ', array([ 0. , 0. , 0.015625, 0.984375]), ' ', array([ 0., 0., 0., 1.])), ('RPE5W24', ': ', array([12, 0, 0, 30]), ' ', array([ 0.28571429, 0. , 0. , 0.71428571]), ' ', array([ 1., 0., 0., 1.])), ('RPE5W27', ': ', array([ 9, 0, 0, 29]), ' ', array([ …	11000000000	0.995658	0.261278	1	1
225	5	143844413	TCTxTGT	C	A	[('RPE5W22', ': ', array([ 0, 0, 48, 0]), ' ', array([ 0., 0., 1., 0.]), ' ', array([ 0., 0., 1., 0.])), ('RPE5W23', ': ', array([ 0, 0, 64, 0]), ' ', array([ 0., 0., 1., 0.]), ' ', array([ 0., 0., 1., 0.])), ('RPE5W24', ': ', array([10, 0, 33, 1]), ' ', array([ 0.22727273, 0. , 0.75 , 0.02272727]), ' ', array([ 1., 0., 1., 0.])), ('RPE5W27', ': ', array([11, 0, 37, 0]), ' ', array([ 0.22916667, …	11000000000	0.992955	0.22822	0.999956	1
226	5	163584023	AGTxAGT	C	A	[('RPE5W22', ': ', array([ 0, 1, 57, 1]), ' ', array([ 0. , 0.01694915, 0.96610169, 0.01694915]), ' ', array([ 0., 0., 1., 0.])), ('RPE5W23', ': ', array([ 0, 0, 44, 1]), ' ', array([ 0. , 0. , 0.97777778, 0.02222222]), ' ', array([ 0., 0., 1., 0.])), ('RPE5W24', ': ', array([11, 0, 42, 0]), ' ', array([ 0.20754717, 0. , 0.79245283, 0. ]), ' ', array([ 1., 0., 1., 0.])), ('RPE5W27', ': ', array([…	11000000000	0.985047	0.242071	0.99976	1
227	6	459717	AAGxAGG	G	A	[('RPE5W22', ': ', array([ 0, 0, 0, 51]), ' ', array([ 0., 0., 0., 1.]), ' ', array([ 0., 0., 0., 1.])), ('RPE5W23', ': ', array([ 0, 0, 0, 37]), ' ', array([ 0., 0., 0., 1.]), ' ', array([ 0., 0., 0., 1.])), ('RPE5W24', ': ', array([10, 0, 0, 26]), ' ', array([ 0.27777778, 0. , 0. , 0.72222222]), ' ', array([ 1., 0., 0., 1.])), ('RPE5W27', ': ', array([13, 0, 0, 37]), ' ', array([ 0.26, 0. , 0. …	11000000000	0.998039	0.268889	0.999632	1
228	6	40596748	CTGxTCT	G	A	[('RPE5W22', ': ', array([ 0, 0, 0, 46]), ' ', array([ 0., 0., 0., 1.]), ' ', array([ 0., 0., 0., 1.])), ('RPE5W23', ': ', array([ 0, 0, 0, 40]), ' ', array([ 0., 0., 0., 1.]), ' ', array([ 0., 0., 0., 1.])), ('RPE5W24', ': ', array([17, 0, 0, 22]), ' ', array([ 0.43589744, 0. , 0. , 0.56410256]), ' ', array([ 1., 0., 0., 1.])), ('RPE5W27', ': ', array([12, 0, 0, 19]), ' ', array([ 0.38709677, 0.…	11000000000	0.985677	0.411497	1	1
229	6	63019981	AATxGAT	G	C	[('RPE5W22', ': ', array([ 0, 0, 0, 52]), ' ', array([ 0., 0., 0., 1.]), ' ', array([ 0., 0., 0., 1.])), ('RPE5W23', ': ', array([ 0, 0, 0, 39]), ' ', array([ 0., 0., 0., 1.]), ' ', array([ 0., 0., 0., 1.])), ('RPE5W24', ': ', array([ 0, 0, 10, 24]), ' ', array([ 0. , 0. , 0.29411765, 0.70588235]), ' ', array([ 0., 0., 1., 1.])), ('RPE5W27', ': ', array([ 1, 0, 9, 25]), ' ', array([ 0.02857143, 0…	11000000000	0.997778	0.27563	0.999526	1
230	6	66089152	AGCxTAT	T	G	[('RPE5W22', ': ', array([ 0, 44, 1, 1]), ' ', array([ 0. , 0.95652174, 0.02173913, 0.02173913]), ' ', array([ 0., 1., 0., 0.])), ('RPE5W23', ': ', array([ 0, 33, 0, 0]), ' ', array([ 0., 1., 0., 0.]), ' ', array([ 0., 1., 0., 0.])), ('RPE5W24', ': ', array([ 0, 20, 0, 18]), ' ', array([ 0. , 0.52631579, 0. , 0.47368421]), ' ', array([ 0., 1., 0., 1.])), ('RPE5W27', ': ', array([ 0, 31, 0, 16]), …	11000000000	0.981608	0.407055	1	1
231	6	103614726	GGAxTCA	G	T	[('RPE5W22', ': ', array([ 0, 0, 0, 38]), ' ', array([ 0., 0., 0., 1.]), ' ', array([ 0., 0., 0., 1.])), ('RPE5W23', ': ', array([ 0, 0, 0, 29]), ' ', array([ 0., 0., 0., 1.]), ' ', array([ 0., 0., 0., 1.])), ('RPE5W24', ': ', array([ 0, 19, 1, 26]), ' ', array([ 0. , 0.41304348, 0.02173913, 0.56521739]), ' ', array([ 0., 1., 0., 1.])), ('RPE5W27', ': ', array([ 0, 14, 0, 33]), ' ', array([ 0. , …	11000000000	0.996	0.355458	0.999957	1
232	6	104782883	TGAxTAT	T	G	[('RPE5W22', ': ', array([ 0, 52, 0, 0]), ' ', array([ 0., 1., 0., 0.]), ' ', array([ 0., 1., 0., 0.])), ('RPE5W23', ': ', array([ 0, 37, 0, 0]), ' ', array([ 0., 1., 0., 0.]), ' ', array([ 0., 1., 0., 0.])), ('RPE5W24', ': ', array([ 0, 30, 0, 11]), ' ', array([ 0. , 0.73170732, 0. , 0.26829268]), ' ', array([ 0., 1., 0., 1.])), ('RPE5W27', ': ', array([ 0, 25, 0, 22]), ' ', array([ 0. , 0.53191…	11000000000	0.979335	0.368189	1	1
233	6	143340487	AGTxATC	C	A	[('RPE5W22', ': ', array([ 0, 0, 44, 2]), ' ', array([ 0. , 0. , 0.95652174, 0.04347826]), ' ', array([ 0., 0., 1., 0.])), ('RPE5W23', ': ', array([ 0, 0, 48, 0]), ' ', array([ 0., 0., 1., 0.]), ' ', array([ 0., 0., 1., 0.])), ('RPE5W24', ': ', array([15, 0, 29, 0]), ' ', array([ 0.34090909, 0. , 0.65909091, 0. ]), ' ', array([ 1., 0., 1., 0.])), ('RPE5W27', ': ', array([ 8, 0, 33, 0]), ' ', arra…	11000000000	0.995652	0.268016	0.999929	1
234	6	162780106	AAAxAAA	A	T	[('RPE5W22', ': ', array([40, 0, 0, 0]), ' ', array([ 1., 0., 0., 0.]), ' ', array([ 1., 0., 0., 0.])), ('RPE5W23', ': ', array([28, 0, 0, 0]), ' ', array([ 1., 0., 0., 0.]), ' ', array([ 1., 0., 0., 0.])), ('RPE5W24', ': ', array([14, 6, 0, 0]), ' ', array([ 0.7, 0.3, 0. , 0. ]), ' ', array([ 1., 1., 0., 0.])), ('RPE5W27', ': ', array([17, 9, 0, 0]), ' ', array([ 0.65384615, 0.34615385, 0. , 0. …	11000000000	1	0.323077	0.999728	1
235	7	32321295	AGGxAGT	C	T	[('RPE5W22', ': ', array([ 0, 0, 83, 0]), ' ', array([ 0., 0., 1., 0.]), ' ', array([ 0., 0., 1., 0.])), ('RPE5W23', ': ', array([ 0, 0, 35, 0]), ' ', array([ 0., 0., 1., 0.]), ' ', array([ 0., 0., 1., 0.])), ('RPE5W24', ': ', array([ 0, 16, 42, 0]), ' ', array([ 0. , 0.27586207, 0.72413793, 0. ]), ' ', array([ 0., 1., 1., 0.])), ('RPE5W27', ': ', array([ 0, 16, 36, 0]), ' ', array([ 0. , 0.30769…	11000000000	0.993831	0.291777	1	1
236	7	33179275	AGGxAGG	C	T	[('RPE5W22', ': ', array([ 0, 0, 78, 0]), ' ', array([ 0., 0., 1., 0.]), ' ', array([ 0., 0., 1., 0.])), ('RPE5W23', ': ', array([ 0, 0, 42, 0]), ' ', array([ 0., 0., 1., 0.]), ' ', array([ 0., 0., 1., 0.])), ('RPE5W24', ': ', array([ 0, 8, 41, 0]), ' ', array([ 0. , 0.16326531, 0.83673469, 0. ]), ' ', array([ 0., 0., 1., 0.])), ('RPE5W27', ': ', array([ 0, 10, 36, 0]), ' ', array([ 0. , 0.217391…	11000000000	0.995288	0.190328	0.999757	1
237	7	48245444	TGTxTAA	G	A	[('RPE5W22', ': ', array([ 0, 2, 0, 68]), ' ', array([ 0. , 0.02857143, 0. , 0.97142857]), ' ', array([ 0., 0., 0., 1.])), ('RPE5W23', ': ', array([ 1, 0, 0, 48]), ' ', array([ 0.02040816, 0. , 0. , 0.97959184]), ' ', array([ 0., 0., 0., 1.])), ('RPE5W24', ': ', array([11, 0, 0, 44]), ' ', array([ 0.2, 0. , 0. , 0.8]), ' ', array([ 0., 0., 0., 1.])), ('RPE5W27', ': ', array([10, 0, 0, 29]), ' ', …	11000000000	0.991249	0.228205	0.999997	1
238	7	53260698	AGTxTAA	G	T	[('RPE5W22', ': ', array([ 0, 0, 0, 64]), ' ', array([ 0., 0., 0., 1.]), ' ', array([ 0., 0., 0., 1.])), ('RPE5W23', ': ', array([ 0, 0, 0, 51]), ' ', array([ 0., 0., 0., 1.]), ' ', array([ 0., 0., 0., 1.])), ('RPE5W24', ': ', array([ 0, 15, 0, 36]), ' ', array([ 0. , 0.29411765, 0. , 0.70588235]), ' ', array([ 0., 1., 0., 1.])), ('RPE5W27', ': ', array([ 0, 9, 0, 36]), ' ', array([ 0. , 0.2, 0. …	11000000000	0.990479	0.247059	1	1
239	7	86700790	TTCxTTA	C	A	[('RPE5W22', ': ', array([ 0, 0, 58, 0]), ' ', array([ 0., 0., 1., 0.]), ' ', array([ 0., 0., 1., 0.])), ('RPE5W23', ': ', array([ 1, 0, 41, 0]), ' ', array([ 0.02380952, 0. , 0.97619048, 0. ]), ' ', array([ 0., 0., 1., 0.])), ('RPE5W24', ': ', array([14, 1, 34, 1]), ' ', array([ 0.28, 0.02, 0.68, 0.02]), ' ', array([ 1., 0., 1., 0.])), ('RPE5W27', ': ', array([11, 0, 46, 0]), ' ', array([ 0.1929…	11000000000	1	0.236491	0.999992	1
240	7	93217537	TGCxTGG	C	G	[('RPE5W22', ': ', array([ 0, 0, 64, 0]), ' ', array([ 0., 0., 1., 0.]), ' ', array([ 0., 0., 1., 0.])), ('RPE5W23', ': ', array([ 0, 0, 48, 0]), ' ', array([ 0., 0., 1., 0.]), ' ', array([ 0., 0., 1., 0.])), ('RPE5W24', ': ', array([ 0, 0, 39, 11]), ' ', array([ 0. , 0. , 0.78, 0.22]), ' ', array([ 0., 0., 1., 1.])), ('RPE5W27', ': ', array([ 0, 0, 36, 14]), ' ', array([ 0. , 0. , 0.72, 0.28]), …	11000000000	0.988611	0.25	0.999989	1
241	7	93383104	GGAxCGA	G	T	[('RPE5W22', ': ', array([ 0, 0, 2, 62]), ' ', array([ 0. , 0. , 0.03125, 0.96875]), ' ', array([ 0., 0., 0., 1.])), ('RPE5W23', ': ', array([ 0, 0, 0, 45]), ' ', array([ 0., 0., 0., 1.]), ' ', array([ 0., 0., 0., 1.])), ('RPE5W24', ': ', array([ 0, 12, 0, 40]), ' ', array([ 0. , 0.23076923, 0. , 0.76923077]), ' ', array([ 0., 1., 0., 1.])), ('RPE5W27', ': ', array([ 0, 15, 0, 45]), ' ', array([ …	11000000000	0.994653	0.240385	0.999997	1
242	7	97318149	ACTxAAG	G	A	[('RPE5W22', ': ', array([ 0, 0, 0, 66]), ' ', array([ 0., 0., 0., 1.]), ' ', array([ 0., 0., 0., 1.])), ('RPE5W23', ': ', array([ 0, 0, 0, 48]), ' ', array([ 0., 0., 0., 1.]), ' ', array([ 0., 0., 0., 1.])), ('RPE5W24', ': ', array([ 8, 0, 0, 57]), ' ', array([ 0.12307692, 0. , 0. , 0.87692308]), ' ', array([ 0., 0., 0., 1.])), ('RPE5W27', ': ', array([ 8, 1, 0, 33]), ' ', array([ 0.19047619, 0.…	11000000000	0.995826	0.156777	0.99705	1
243	7	106937047	TTTxAAA	T	A	[('RPE5W22', ': ', array([ 0, 54, 1, 0]), ' ', array([ 0. , 0.98181818, 0.01818182, 0. ]), ' ', array([ 0., 1., 0., 0.])), ('RPE5W23', ': ', array([ 0, 50, 0, 0]), ' ', array([ 0., 1., 0., 0.]), ' ', array([ 0., 1., 0., 0.])), ('RPE5W24', ': ', array([13, 30, 0, 0]), ' ', array([ 0.30232558, 0.69767442, 0. , 0. ]), ' ', array([ 1., 1., 0., 0.])), ('RPE5W27', ': ', array([10, 26, 0, 0]), ' ', arra…	11000000000	0.99384	0.290052	1	1
244	7	124306171	TGAxGTA	A	C	[('RPE5W22', ': ', array([83, 0, 0, 0]), ' ', array([ 1., 0., 0., 0.]), ' ', array([ 1., 0., 0., 0.])), ('RPE5W23', ': ', array([54, 0, 0, 0]), ' ', array([ 1., 0., 0., 0.]), ' ', array([ 1., 0., 0., 0.])), ('RPE5W24', ': ', array([54, 0, 9, 0]), ' ', array([ 0.85714286, 0. , 0.14285714, 0. ]), ' ', array([ 1., 0., 0., 0.])), ('RPE5W27', ': ', array([42, 0, 11, 0]), ' ', array([ 0.79245283, 0. , …	11000000000	0.990239	0.175202	0.995033	1
245	7	124306259	AAAxATG	T	G	[('RPE5W22', ': ', array([ 0, 71, 0, 0]), ' ', array([ 0., 1., 0., 0.]), ' ', array([ 0., 1., 0., 0.])), ('RPE5W23', ': ', array([ 0, 47, 0, 1]), ' ', array([ 0. , 0.97916667, 0. , 0.02083333]), ' ', array([ 0., 1., 0., 0.])), ('RPE5W24', ': ', array([ 1, 47, 0, 11]), ' ', array([ 0.01694915, 0.79661017, 0. , 0.18644068]), ' ', array([ 0., 1., 0., 0.])), ('RPE5W27', ': ', array([ 0, 41, 0, 15]), …	11000000000	0.996426	0.227149	0.999914	1
246	8	15085966	AAAxGTA	A	C	[('RPE5W22', ': ', array([60, 0, 0, 0]), ' ', array([ 1., 0., 0., 0.]), ' ', array([ 1., 0., 0., 0.])), ('RPE5W23', ': ', array([42, 0, 0, 0]), ' ', array([ 1., 0., 0., 0.]), ' ', array([ 1., 0., 0., 0.])), ('RPE5W24', ': ', array([26, 0, 22, 0]), ' ', array([ 0.54166667, 0. , 0.45833333, 0. ]), ' ', array([ 1., 0., 1., 0.])), ('RPE5W27', ': ', array([21, 0, 12, 0]), ' ', array([ 0.63636364, 0. ,…	11000000000	0.997436	0.410985	1	1
247	8	48602541	GTGxATT	A	C	[('RPE5W22', ': ', array([55, 0, 0, 0]), ' ', array([ 1., 0., 0., 0.]), ' ', array([ 1., 0., 0., 0.])), ('RPE5W23', ': ', array([39, 0, 0, 0]), ' ', array([ 1., 0., 0., 0.]), ' ', array([ 1., 0., 0., 0.])), ('RPE5W24', ': ', array([30, 0, 15, 0]), ' ', array([ 0.66666667, 0. , 0.33333333, 0. ]), ' ', array([ 1., 0., 1., 0.])), ('RPE5W27', ': ', array([24, 0, 12, 0]), ' ', array([ 0.66666667, 0. ,…	11000000000	0.996667	0.333333	0.999993	1
248	9	86812133	AAAxGAA	T	C	[('RPE5W22', ': ', array([ 0, 54, 0, 1]), ' ', array([ 0. , 0.98181818, 0. , 0.01818182]), ' ', array([ 0., 1., 0., 0.])), ('RPE5W23', ': ', array([ 0, 36, 0, 0]), ' ', array([ 0., 1., 0., 0.]), ' ', array([ 0., 1., 0., 0.])), ('RPE5W24', ': ', array([ 0, 21, 7, 0]), ' ', array([ 0. , 0.75, 0.25, 0. ]), ' ', array([ 0., 1., 1., 0.])), ('RPE5W27', ': ', array([ 0, 21, 15, 0]), ' ', array([ 0. , 0.…	11000000000	0.991703	0.333333	1	1
249	9	120859468	AAAxTGT	T	C	[('RPE5W22', ': ', array([ 0, 70, 0, 0]), ' ', array([ 0., 1., 0., 0.]), ' ', array([ 0., 1., 0., 0.])), ('RPE5W23', ': ', array([ 0, 45, 0, 0]), ' ', array([ 0., 1., 0., 0.]), ' ', array([ 0., 1., 0., 0.])), ('RPE5W24', ': ', array([ 0, 17, 11, 0]), ' ', array([ 0. , 0.60714286, 0.39285714, 0. ]), ' ', array([ 0., 1., 1., 0.])), ('RPE5W27', ': ', array([ 0, 29, 18, 0]), ' ', array([ 0. , 0.61702…	11000000000	0.995743	0.387918	0.999998	1
250	9	140997135	GTGxCCT	C	T	[('RPE5W22', ': ', array([ 0, 0, 53, 0]), ' ', array([ 0., 0., 1., 0.]), ' ', array([ 0., 0., 1., 0.])), ('RPE5W23', ': ', array([ 0, 0, 42, 0]), ' ', array([ 0., 0., 1., 0.]), ' ', array([ 0., 0., 1., 0.])), ('RPE5W24', ': ', array([ 0, 10, 26, 2]), ' ', array([ 0. , 0.26315789, 0.68421053, 0.05263158]), ' ', array([ 0., 1., 1., 0.])), ('RPE5W27', ': ', array([ 0, 18, 23, 0]), ' ', array([ 0. , …	11000000000	0.993594	0.351091	1	1
251	10	19972025	AAGxCCA	A	T	[('RPE5W22', ': ', array([41, 0, 0, 0]), ' ', array([ 1., 0., 0., 0.]), ' ', array([ 1., 0., 0., 0.])), ('RPE5W23', ': ', array([19, 0, 0, 0]), ' ', array([ 1., 0., 0., 0.]), ' ', array([ 1., 0., 0., 0.])), ('RPE5W24', ': ', array([ 9, 10, 0, 0]), ' ', array([ 0.47368421, 0.52631579, 0. , 0. ]), ' ', array([ 1., 1., 0., 0.])), ('RPE5W27', ': ', array([10, 14, 1, 0]), ' ', array([ 0.4 , 0.56, 0.04…	11000000000	0.980743	0.543158	0.999999	1
252	10	57858365	TTTxTAT	C	A	[('RPE5W22', ': ', array([ 0, 0, 30, 0]), ' ', array([ 0., 0., 1., 0.]), ' ', array([ 0., 0., 1., 0.])), ('RPE5W23', ': ', array([ 0, 0, 32, 0]), ' ', array([ 0., 0., 1., 0.]), ' ', array([ 0., 0., 1., 0.])), ('RPE5W24', ': ', array([21, 0, 11, 0]), ' ', array([ 0.65625, 0. , 0.34375, 0. ]), ' ', array([ 1., 0., 1., 0.])), ('RPE5W27', ': ', array([ 7, 0, 11, 0]), ' ', array([ 0.38888889, 0. , 0.6…	11000000000	0.995833	0.522569	1	1
253	10	76289141	TTGxGTA	T	C	[('RPE5W22', ': ', array([ 0, 83, 0, 2]), ' ', array([ 0. , 0.97647059, 0. , 0.02352941]), ' ', array([ 0., 1., 0., 0.])), ('RPE5W23', ': ', array([ 0, 50, 0, 0]), ' ', array([ 0., 1., 0., 0.]), ' ', array([ 0., 1., 0., 0.])), ('RPE5W24', ': ', array([ 0, 22, 10, 0]), ' ', array([ 0. , 0.6875, 0.3125, 0. ]), ' ', array([ 0., 1., 1., 0.])), ('RPE5W27', ': ', array([ 0, 36, 15, 0]), ' ', array([ 0.…	11000000000	0.988552	0.303309	1	1
254	10	88481639	TTAxAAT	C	T	[('RPE5W22', ': ', array([ 0, 0, 69, 1]), ' ', array([ 0. , 0. , 0.98571429, 0.01428571]), ' ', array([ 0., 0., 1., 0.])), ('RPE5W23', ': ', array([ 0, 0, 60, 0]), ' ', array([ 0., 0., 1., 0.]), ' ', array([ 0., 0., 1., 0.])), ('RPE5W24', ': ', array([ 0, 11, 42, 0]), ' ', array([ 0. , 0.20754717, 0.79245283, 0. ]), ' ', array([ 0., 1., 1., 0.])), ('RPE5W27', ': ', array([ 0, 13, 40, 0]), ' ', ar…	11000000000	0.985184	0.226415	0.999801	1
255	10	103557613	AACxTAG	C	G	[('RPE5W22', ': ', array([ 0, 0, 67, 0]), ' ', array([ 0., 0., 1., 0.]), ' ', array([ 0., 0., 1., 0.])), ('RPE5W23', ': ', array([ 1, 0, 61, 0]), ' ', array([ 0.01612903, 0. , 0.98387097, 0. ]), ' ', array([ 0., 0., 1., 0.])), ('RPE5W24', ': ', array([ 0, 0, 36, 16]), ' ', array([ 0. , 0. , 0.69230769, 0.30769231]), ' ', array([ 0., 0., 1., 1.])), ('RPE5W27', ': ', array([ 0, 1, 24, 10]), ' ', ar…	11000000000	0.998276	0.296703	1	1
256	10	132163138	GCAxTTC	G	T	[('RPE5W22', ': ', array([ 1, 0, 0, 51]), ' ', array([ 0.01923077, 0. , 0. , 0.98076923]), ' ', array([ 0., 0., 0., 1.])), ('RPE5W23', ': ', array([ 0, 0, 0, 53]), ' ', array([ 0., 0., 0., 1.]), ' ', array([ 0., 0., 0., 1.])), ('RPE5W24', ': ', array([ 0, 9, 0, 27]), ' ', array([ 0. , 0.25, 0. , 0.75]), ' ', array([ 0., 1., 0., 1.])), ('RPE5W27', ': ', array([ 0, 9, 0, 43]), ' ', array([ 0. , 0.1…	11000000000	0.996323	0.211538	0.999994	1
257	11	16864066	GTTxACC	G	A	[('RPE5W22', ': ', array([ 1, 0, 0, 51]), ' ', array([ 0.01923077, 0. , 0. , 0.98076923]), ' ', array([ 0., 0., 0., 1.])), ('RPE5W23', ': ', array([ 0, 0, 0, 25]), ' ', array([ 0., 0., 0., 1.]), ' ', array([ 0., 0., 0., 1.])), ('RPE5W24', ': ', array([15, 0, 0, 44]), ' ', array([ 0.25423729, 0. , 0. , 0.74576271]), ' ', array([ 1., 0., 0., 1.])), ('RPE5W27', ': ', array([ 9, 0, 0, 33]), ' ', arra…	11000000000	0.975471	0.234262	0.9972	1
258	11	27186406	TCTxGCC	G	T	[('RPE5W22', ': ', array([ 0, 0, 0, 62]), ' ', array([ 0., 0., 0., 1.]), ' ', array([ 0., 0., 0., 1.])), ('RPE5W23', ': ', array([ 1, 0, 0, 40]), ' ', array([ 0.02439024, 0. , 0. , 0.97560976]), ' ', array([ 0., 0., 0., 1.])), ('RPE5W24', ': ', array([ 0, 12, 0, 41]), ' ', array([ 0. , 0.22641509, 0. , 0.77358491]), ' ', array([ 0., 1., 0., 1.])), ('RPE5W27', ': ', array([ 0, 11, 1, 35]), ' ', ar…	11000000000	0.991838	0.230229	0.999997	1
259	11	39344304	AATxCAG	C	G	[('RPE5W22', ': ', array([ 0, 1, 65, 0]), ' ', array([ 0. , 0.01515152, 0.98484848, 0. ]), ' ', array([ 0., 0., 1., 0.])), ('RPE5W23', ': ', array([ 0, 0, 51, 0]), ' ', array([ 0., 0., 1., 0.]), ' ', array([ 0., 0., 1., 0.])), ('RPE5W24', ': ', array([ 1, 0, 35, 18]), ' ', array([ 0.01851852, 0. , 0.64814815, 0.33333333]), ' ', array([ 0., 0., 1., 1.])), ('RPE5W27', ': ', array([ 0, 1, 29, 10]), …	11000000000	0.987612	0.291667	1	1
260	11	55059106	TAAxTAT	G	T	[('RPE5W22', ': ', array([ 0, 0, 0, 65]), ' ', array([ 0., 0., 0., 1.]), ' ', array([ 0., 0., 0., 1.])), ('RPE5W23', ': ', array([ 0, 0, 0, 48]), ' ', array([ 0., 0., 0., 1.]), ' ', array([ 0., 0., 0., 1.])), ('RPE5W24', ': ', array([ 0, 15, 1, 38]), ' ', array([ 0. , 0.27777778, 0.01851852, 0.7037037 ]), ' ', array([ 0., 1., 0., 1.])), ('RPE5W27', ': ', array([ 0, 14, 0, 43]), ' ', array([ 0. , …	11000000000	0.986961	0.261696	0.999993	1
261	11	69038709	AGCxAGT	C	T	[('RPE5W22', ': ', array([ 0, 0, 84, 0]), ' ', array([ 0., 0., 1., 0.]), ' ', array([ 0., 0., 1., 0.])), ('RPE5W23', ': ', array([ 0, 0, 55, 1]), ' ', array([ 0. , 0. , 0.98214286, 0.01785714]), ' ', array([ 0., 0., 1., 0.])), ('RPE5W24', ': ', array([ 0, 10, 33, 0]), ' ', array([ 0. , 0.23255814, 0.76744186, 0. ]), ' ', array([ 0., 1., 1., 0.])), ('RPE5W27', ': ', array([ 0, 10, 43, 0]), ' ', ar…	11000000000	0.992353	0.210619	0.999959	1
262	11	72379342	TACxTGT	C	A	[('RPE5W22', ': ', array([ 0, 0, 65, 0]), ' ', array([ 0., 0., 1., 0.]), ' ', array([ 0., 0., 1., 0.])), ('RPE5W23', ': ', array([ 0, 0, 54, 0]), ' ', array([ 0., 0., 1., 0.]), ' ', array([ 0., 0., 1., 0.])), ('RPE5W24', ': ', array([10, 0, 51, 0]), ' ', array([ 0.16393443, 0. , 0.83606557, 0. ]), ' ', array([ 0., 0., 1., 0.])), ('RPE5W27', ': ', array([10, 0, 37, 0]), ' ', array([ 0.21276596, 0.…	11000000000	0.994352	0.18835	0.999812	1
263	11	92553774	ACTxCTC	G	T	[('RPE5W22', ': ', array([ 0, 0, 0, 65]), ' ', array([ 0., 0., 0., 1.]), ' ', array([ 0., 0., 0., 1.])), ('RPE5W23', ': ', array([ 0, 0, 0, 44]), ' ', array([ 0., 0., 0., 1.]), ' ', array([ 0., 0., 0., 1.])), ('RPE5W24', ': ', array([ 0, 17, 0, 25]), ' ', array([ 0. , 0.4047619, 0. , 0.5952381]), ' ', array([ 0., 1., 0., 1.])), ('RPE5W27', ': ', array([ 0, 8, 2, 38]), ' ', array([ 0. , 0.16666667…	11000000000	0.995459	0.285714	1	1
264	11	130135282	CCAxCTA	G	T	[('RPE5W22', ': ', array([ 0, 0, 0, 71]), ' ', array([ 0., 0., 0., 1.]), ' ', array([ 0., 0., 0., 1.])), ('RPE5W23', ': ', array([ 0, 0, 1, 39]), ' ', array([ 0. , 0. , 0.025, 0.975]), ' ', array([ 0., 0., 0., 1.])), ('RPE5W24', ': ', array([ 0, 13, 0, 39]), ' ', array([ 0. , 0.25, 0. , 0.75]), ' ', array([ 0., 1., 0., 1.])), ('RPE5W27', ': ', array([ 1, 9, 0, 29]), ' ', array([ 0.02564103, 0.230…	11000000000	0.991277	0.240385	0.999831	1
265	12	13620536	CATxTGC	G	A	[('RPE5W22', ': ', array([ 0, 0, 0, 60]), ' ', array([ 0., 0., 0., 1.]), ' ', array([ 0., 0., 0., 1.])), ('RPE5W23', ': ', array([ 1, 0, 0, 61]), ' ', array([ 0.01612903, 0. , 0. , 0.98387097]), ' ', array([ 0., 0., 0., 1.])), ('RPE5W24', ': ', array([15, 0, 0, 36]), ' ', array([ 0.29411765, 0. , 0. , 0.70588235]), ' ', array([ 1., 0., 0., 1.])), ('RPE5W27', ': ', array([13, 0, 0, 38]), ' ', arra…	11000000000	0.992427	0.27451	1	1
266	12	13681047	GTGxAGT	C	A	[('RPE5W22', ': ', array([ 0, 0, 81, 0]), ' ', array([ 0., 0., 1., 0.]), ' ', array([ 0., 0., 1., 0.])), ('RPE5W23', ': ', array([ 0, 0, 51, 0]), ' ', array([ 0., 0., 1., 0.]), ' ', array([ 0., 0., 1., 0.])), ('RPE5W24', ': ', array([ 9, 0, 34, 0]), ' ', array([ 0.20930233, 0. , 0.79069767, 0. ]), ' ', array([ 1., 0., 1., 0.])), ('RPE5W27', ': ', array([16, 0, 47, 1]), ' ', array([ 0.25 , 0. , 0.…	11000000000	0.994829	0.229651	0.999991	1
267	12	38473953	CTGxAAC	C	A	[('RPE5W22', ': ', array([ 2, 0, 70, 0]), ' ', array([ 0.02777778, 0. , 0.97222222, 0. ]), ' ', array([ 0., 0., 1., 0.])), ('RPE5W23', ': ', array([ 0, 0, 29, 0]), ' ', array([ 0., 0., 1., 0.]), ' ', array([ 0., 0., 1., 0.])), ('RPE5W24', ': ', array([13, 0, 44, 0]), ' ', array([ 0.22807018, 0. , 0.77192982, 0. ]), ' ', array([ 1., 0., 1., 0.])), ('RPE5W27', ': ', array([15, 0, 36, 0]), ' ', arra…	11000000000	0.995139	0.261094	0.999972	1
268	12	38666601	ACTxCAT	T	C	[('RPE5W22', ': ', array([ 0, 68, 0, 1]), ' ', array([ 0. , 0.98550725, 0. , 0.01449275]), ' ', array([ 0., 1., 0., 0.])), ('RPE5W23', ': ', array([ 0, 49, 0, 0]), ' ', array([ 0., 1., 0., 0.]), ' ', array([ 0., 1., 0., 0.])), ('RPE5W24', ': ', array([ 1, 41, 14, 0]), ' ', array([ 0.01785714, 0.73214286, 0.25 , 0. ]), ' ', array([ 0., 1., 1., 0.])), ('RPE5W27', ': ', array([ 1, 38, 9, 0]), ' ', a…	11000000000	0.988575	0.21875	0.999924	1
269	12	56338230	GGGxAAC	C	A	[('RPE5W22', ': ', array([ 0, 0, 87, 0]), ' ', array([ 0., 0., 1., 0.]), ' ', array([ 0., 0., 1., 0.])), ('RPE5W23', ': ', array([ 0, 0, 55, 1]), ' ', array([ 0. , 0. , 0.98214286, 0.01785714]), ' ', array([ 0., 0., 1., 0.])), ('RPE5W24', ': ', array([10, 0, 51, 0]), ' ', array([ 0.16393443, 0. , 0.83606557, 0. ]), ' ', array([ 0., 0., 1., 0.])), ('RPE5W27', ': ', array([11, 0, 41, 2]), ' ', arra…	11000000000	0.99053	0.183819	0.998949	1
270	12	83905198	GAAxTAG	C	A	[('RPE5W22', ': ', array([ 1, 0, 85, 0]), ' ', array([ 0.01162791, 0. , 0.98837209, 0. ]), ' ', array([ 0., 0., 1., 0.])), ('RPE5W23', ': ', array([ 0, 0, 45, 0]), ' ', array([ 0., 0., 1., 0.]), ' ', array([ 0., 0., 1., 0.])), ('RPE5W24', ': ', array([16, 0, 31, 0]), ' ', array([ 0.34042553, 0. , 0.65957447, 0. ]), ' ', array([ 1., 0., 1., 0.])), ('RPE5W27', ': ', array([12, 0, 38, 0]), ' ', arra…	11000000000	0.988027	0.290213	1	1
271	12	103029281	GTTxCTT	C	A	[('RPE5W22', ': ', array([ 1, 0, 65, 0]), ' ', array([ 0.01515152, 0. , 0.98484848, 0. ]), ' ', array([ 0., 0., 1., 0.])), ('RPE5W23', ': ', array([ 0, 0, 37, 0]), ' ', array([ 0., 0., 1., 0.]), ' ', array([ 0., 0., 1., 0.])), ('RPE5W24', ': ', array([11, 0, 37, 0]), ' ', array([ 0.22916667, 0. , 0.77083333, 0. ]), ' ', array([ 1., 0., 1., 0.])), ('RPE5W27', ': ', array([ 8, 0, 34, 0]), ' ', arra…	11000000000	0.994493	0.209821	0.997683	1
272	13	29353101	TCAxGAC	G	A	[('RPE5W22', ': ', array([ 0, 0, 0, 36]), ' ', array([ 0., 0., 0., 1.]), ' ', array([ 0., 0., 0., 1.])), ('RPE5W23', ': ', array([ 0, 0, 0, 36]), ' ', array([ 0., 0., 0., 1.]), ' ', array([ 0., 0., 0., 1.])), ('RPE5W24', ': ', array([12, 0, 0, 16]), ' ', array([ 0.42857143, 0. , 0. , 0.57142857]), ' ', array([ 1., 0., 0., 1.])), ('RPE5W27', ': ', array([19, 0, 0, 24]), ' ', array([ 0.44186047, 0.…	11000000000	0.997222	0.435216	1	1
273	13	52502301	TGTxATC	C	T	[('RPE5W22', ': ', array([ 0, 0, 55, 0]), ' ', array([ 0., 0., 1., 0.]), ' ', array([ 0., 0., 1., 0.])), ('RPE5W23', ': ', array([ 0, 0, 26, 0]), ' ', array([ 0., 0., 1., 0.]), ' ', array([ 0., 0., 1., 0.])), ('RPE5W24', ': ', array([ 0, 8, 18, 0]), ' ', array([ 0. , 0.30769231, 0.69230769, 0. ]), ' ', array([ 0., 1., 1., 0.])), ('RPE5W27', ': ', array([ 0, 9, 25, 0]), ' ', array([ 0. , 0.2647058…	11000000000	0.991429	0.286199	0.997104	1
274	13	92297378	AATxAAG	C	A	[('RPE5W22', ': ', array([ 0, 0, 67, 0]), ' ', array([ 0., 0., 1., 0.]), ' ', array([ 0., 0., 1., 0.])), ('RPE5W23', ': ', array([ 0, 0, 42, 0]), ' ', array([ 0., 0., 1., 0.]), ' ', array([ 0., 0., 1., 0.])), ('RPE5W24', ': ', array([11, 0, 34, 0]), ' ', array([ 0.24444444, 0. , 0.75555556, 0. ]), ' ', array([ 1., 0., 1., 0.])), ('RPE5W27', ': ', array([ 7, 0, 20, 0]), ' ', array([ 0.25925926, 0.…	11000000000	0.993726	0.251852	0.997368	1
275	13	108116659	GATxAAT	G	T	[('RPE5W22', ': ', array([ 1, 0, 0, 60]), ' ', array([ 0.01639344, 0. , 0. , 0.98360656]), ' ', array([ 0., 0., 0., 1.])), ('RPE5W23', ': ', array([ 0, 0, 1, 38]), ' ', array([ 0. , 0. , 0.02564103, 0.97435897]), ' ', array([ 0., 0., 0., 1.])), ('RPE5W24', ': ', array([ 1, 14, 0, 16]), ' ', array([ 0.03225806, 0.4516129 , 0. , 0.51612903]), ' ', array([ 0., 1., 0., 1.])), ('RPE5W27', ': ', array(…	11000000000	0.993777	0.497235	1	1
276	13	110147918	GGGxAGA	G	T	[('RPE5W22', ': ', array([ 0, 0, 0, 40]), ' ', array([ 0., 0., 0., 1.]), ' ', array([ 0., 0., 0., 1.])), ('RPE5W23', ': ', array([ 0, 0, 0, 42]), ' ', array([ 0., 0., 0., 1.]), ' ', array([ 0., 0., 0., 1.])), ('RPE5W24', ': ', array([ 0, 11, 0, 25]), ' ', array([ 0. , 0.30555556, 0. , 0.69444444]), ' ', array([ 0., 1., 0., 1.])), ('RPE5W27', ': ', array([ 0, 9, 0, 20]), ' ', array([ 0. , 0.310344…	11000000000	1	0.30795	0.999875	1
277	14	27816056	TCAxAAA	T	C	[('RPE5W22', ': ', array([ 0, 46, 0, 0]), ' ', array([ 0., 1., 0., 0.]), ' ', array([ 0., 1., 0., 0.])), ('RPE5W23', ': ', array([ 0, 35, 0, 0]), ' ', array([ 0., 1., 0., 0.]), ' ', array([ 0., 1., 0., 0.])), ('RPE5W24', ': ', array([ 0, 26, 9, 0]), ' ', array([ 0. , 0.74285714, 0.25714286, 0. ]), ' ', array([ 0., 1., 1., 0.])), ('RPE5W27', ': ', array([ 0, 34, 16, 0]), ' ', array([ 0. , 0.68, 0.…	11000000000	0.995475	0.288571	0.999997	1
278	14	63189541	GAGxCTC	G	A	[('RPE5W22', ': ', array([ 0, 0, 0, 52]), ' ', array([ 0., 0., 0., 1.]), ' ', array([ 0., 0., 0., 1.])), ('RPE5W23', ': ', array([ 0, 0, 0, 29]), ' ', array([ 0., 0., 0., 1.]), ' ', array([ 0., 0., 0., 1.])), ('RPE5W24', ': ', array([12, 0, 0, 30]), ' ', array([ 0.28571429, 0. , 0. , 0.71428571]), ' ', array([ 1., 0., 0., 1.])), ('RPE5W27', ': ', array([15, 0, 0, 23]), ' ', array([ 0.39473684, 0.…	11000000000	0.990978	0.340226	0.999999	1
279	15	22326719	AATxGCA	A	T	[('RPE5W22', ': ', array([72, 0, 0, 0]), ' ', array([ 1., 0., 0., 0.]), ' ', array([ 1., 0., 0., 0.])), ('RPE5W23', ': ', array([54, 1, 0, 0]), ' ', array([ 0.98181818, 0.01818182, 0. , 0. ]), ' ', array([ 1., 0., 0., 0.])), ('RPE5W24', ': ', array([38, 12, 0, 0]), ' ', array([ 0.76, 0.24, 0. , 0. ]), ' ', array([ 1., 1., 0., 0.])), ('RPE5W27', ': ', array([45, 15, 0, 0]), ' ', array([ 0.75, 0.25…	11000000000	1	0.245	1	1
280	15	28138047	ACAxTAA	T	C	[('RPE5W22', ': ', array([ 0, 55, 0, 0]), ' ', array([ 0., 1., 0., 0.]), ' ', array([ 0., 1., 0., 0.])), ('RPE5W23', ': ', array([ 0, 34, 0, 0]), ' ', array([ 0., 1., 0., 0.]), ' ', array([ 0., 1., 0., 0.])), ('RPE5W24', ': ', array([ 0, 20, 8, 0]), ' ', array([ 0. , 0.71428571, 0.28571429, 0. ]), ' ', array([ 0., 1., 1., 0.])), ('RPE5W27', ': ', array([ 0, 22, 14, 1]), ' ', array([ 0. , 0.594594…	11000000000	0.992172	0.332046	1	1
281	15	69988644	AGTxACC	T	A	[('RPE5W22', ': ', array([ 0, 65, 0, 0]), ' ', array([ 0., 1., 0., 0.]), ' ', array([ 0., 1., 0., 0.])), ('RPE5W23', ': ', array([ 0, 30, 0, 0]), ' ', array([ 0., 1., 0., 0.]), ' ', array([ 0., 1., 0., 0.])), ('RPE5W24', ': ', array([11, 28, 0, 0]), ' ', array([ 0.28205128, 0.71794872, 0. , 0. ]), ' ', array([ 1., 1., 0., 0.])), ('RPE5W27', ': ', array([ 8, 24, 0, 0]), ' ', array([ 0.25, 0.75, 0.…	11000000000	0.993725	0.266026	0.999965	1
282	15	98348139	GTGxCTT	C	A	[('RPE5W22', ': ', array([ 0, 0, 48, 0]), ' ', array([ 0., 0., 1., 0.]), ' ', array([ 0., 0., 1., 0.])), ('RPE5W23', ': ', array([ 0, 0, 36, 0]), ' ', array([ 0., 0., 1., 0.]), ' ', array([ 0., 0., 1., 0.])), ('RPE5W24', ': ', array([11, 0, 31, 0]), ' ', array([ 0.26190476, 0. , 0.73809524, 0. ]), ' ', array([ 1., 0., 1., 0.])), ('RPE5W27', ': ', array([12, 0, 26, 0]), ' ', array([ 0.31578947, 0.…	11000000000	0.995917	0.288847	0.999938	1
283	16	24566580	TAAxTTA	A	G	[('RPE5W22', ': ', array([79, 0, 0, 0]), ' ', array([ 1., 0., 0., 0.]), ' ', array([ 1., 0., 0., 0.])), ('RPE5W23', ': ', array([54, 0, 0, 0]), ' ', array([ 1., 0., 0., 0.]), ' ', array([ 1., 0., 0., 0.])), ('RPE5W24', ': ', array([39, 0, 0, 14]), ' ', array([ 0.73584906, 0. , 0. , 0.26415094]), ' ', array([ 1., 0., 0., 1.])), ('RPE5W27', ': ', array([56, 0, 0, 10]), ' ', array([ 0.84848485, 0. ,…	11000000000	0.98926	0.207833	0.99876	1
284	16	31813800	CATxATG	C	A	[('RPE5W22', ': ', array([ 0, 0, 66, 0]), ' ', array([ 0., 0., 1., 0.]), ' ', array([ 0., 0., 1., 0.])), ('RPE5W23', ': ', array([ 0, 0, 43, 0]), ' ', array([ 0., 0., 1., 0.]), ' ', array([ 0., 0., 1., 0.])), ('RPE5W24', ': ', array([11, 0, 41, 1]), ' ', array([ 0.20754717, 0. , 0.77358491, 0.01886792]), ' ', array([ 1., 0., 1., 0.])), ('RPE5W27', ': ', array([13, 0, 36, 0]), ' ', array([ 0.26530…	11000000000	0.995368	0.236427	0.999916	1
285	16	34412028	TTTxTTT	G	A	[('RPE5W22', ': ', array([ 0, 0, 0, 76]), ' ', array([ 0., 0., 0., 1.]), ' ', array([ 0., 0., 0., 1.])), ('RPE5W23', ': ', array([ 0, 0, 0, 36]), ' ', array([ 0., 0., 0., 1.]), ' ', array([ 0., 0., 0., 1.])), ('RPE5W24', ': ', array([11, 0, 0, 49]), ' ', array([ 0.18333333, 0. , 0. , 0.81666667]), ' ', array([ 0., 0., 0., 1.])), ('RPE5W27', ': ', array([ 9, 0, 0, 22]), ' ', array([ 0.29032258, 0.…	11000000000	0.989966	0.236828	0.999997	1
286	16	48360940	GATxGCT	G	A	[('RPE5W22', ': ', array([ 1, 0, 0, 69]), ' ', array([ 0.01428571, 0. , 0. , 0.98571429]), ' ', array([ 0., 0., 0., 1.])), ('RPE5W23', ': ', array([ 0, 0, 0, 45]), ' ', array([ 0., 0., 0., 1.]), ' ', array([ 0., 0., 0., 1.])), ('RPE5W24', ': ', array([11, 0, 0, 40]), ' ', array([ 0.21568627, 0. , 0. , 0.78431373]), ' ', array([ 1., 0., 0., 1.])), ('RPE5W27', ': ', array([ 9, 0, 0, 47]), ' ', arra…	11000000000	0.994118	0.1882	0.99994	1
287	16	78494989	GATxCCA	G	A	[('RPE5W22', ': ', array([ 0, 0, 1, 77]), ' ', array([ 0. , 0. , 0.01282051, 0.98717949]), ' ', array([ 0., 0., 0., 1.])), ('RPE5W23', ': ', array([ 0, 0, 0, 48]), ' ', array([ 0., 0., 0., 1.]), ' ', array([ 0., 0., 0., 1.])), ('RPE5W24', ': ', array([15, 0, 0, 42]), ' ', array([ 0.26315789, 0. , 0. , 0.73684211]), ' ', array([ 1., 0., 0., 1.])), ('RPE5W27', ': ', array([24, 0, 0, 53]), ' ', arra…	11000000000	0.991392	0.287423	1	1
288	16	81388001	CTAxTTT	C	T	[('RPE5W22', ': ', array([ 0, 0, 64, 0]), ' ', array([ 0., 0., 1., 0.]), ' ', array([ 0., 0., 1., 0.])), ('RPE5W23', ': ', array([ 0, 0, 51, 1]), ' ', array([ 0. , 0. , 0.98076923, 0.01923077]), ' ', array([ 0., 0., 1., 0.])), ('RPE5W24', ': ', array([ 0, 5, 43, 0]), ' ', array([ 0. , 0.10416667, 0.89583333, 0. ]), ' ', array([ 0., 0., 1., 0.])), ('RPE5W27', ': ', array([ 0, 8, 44, 0]), ' ', arra…	11000000000	0.996447	0.129006	0.997216	1
289	17	60011619	GACxAGC	C	A	[('RPE5W22', ': ', array([ 0, 0, 41, 0]), ' ', array([ 0., 0., 1., 0.]), ' ', array([ 0., 0., 1., 0.])), ('RPE5W23', ': ', array([ 0, 0, 30, 2]), ' ', array([ 0. , 0. , 0.9375, 0.0625]), ' ', array([ 0., 0., 1., 0.])), ('RPE5W24', ': ', array([14, 0, 22, 0]), ' ', array([ 0.38888889, 0. , 0.61111111, 0. ]), ' ', array([ 1., 0., 1., 0.])), ('RPE5W27', ': ', array([11, 0, 22, 0]), ' ', array([ 0.33…	11000000000	0.987733	0.361111	0.999999	1
290	18	56137478	CAGxGCA	G	A	[('RPE5W22', ': ', array([ 0, 0, 0, 31]), ' ', array([ 0., 0., 0., 1.]), ' ', array([ 0., 0., 0., 1.])), ('RPE5W23', ': ', array([ 0, 0, 0, 19]), ' ', array([ 0., 0., 0., 1.]), ' ', array([ 0., 0., 0., 1.])), ('RPE5W24', ': ', array([15, 0, 0, 13]), ' ', array([ 0.53571429, 0. , 0. , 0.46428571]), ' ', array([ 1., 0., 0., 1.])), ('RPE5W27', ': ', array([ 6, 0, 0, 10]), ' ', array([ 0.375, 0. , 0.…	11000000000	1	0.455357	0.999997	1
291	19	1833108	TCCxAGC	C	A	[('RPE5W22', ': ', array([ 0, 0, 41, 0]), ' ', array([ 0., 0., 1., 0.]), ' ', array([ 0., 0., 1., 0.])), ('RPE5W23', ': ', array([ 0, 0, 35, 0]), ' ', array([ 0., 0., 1., 0.]), ' ', array([ 0., 0., 1., 0.])), ('RPE5W24', ': ', array([13, 0, 22, 0]), ' ', array([ 0.37142857, 0. , 0.62857143, 0. ]), ' ', array([ 1., 0., 1., 0.])), ('RPE5W27', ': ', array([ 9, 0, 31, 0]), ' ', array([ 0.225, 0. , 0.…	11000000000	0.996552	0.298214	0.99988	1
292	19	9046055	GTGxTGG	C	T	[('RPE5W22', ': ', array([ 0, 0, 46, 0]), ' ', array([ 0., 0., 1., 0.]), ' ', array([ 0., 0., 1., 0.])), ('RPE5W23', ': ', array([ 0, 0, 35, 0]), ' ', array([ 0., 0., 1., 0.]), ' ', array([ 0., 0., 1., 0.])), ('RPE5W24', ': ', array([ 0, 18, 29, 0]), ' ', array([ 0. , 0.38297872, 0.61702128, 0. ]), ' ', array([ 0., 1., 1., 0.])), ('RPE5W27', ': ', array([ 0, 8, 22, 0]), ' ', array([ 0. , 0.266666…	11000000000	0.99021	0.324823	1	1
293	19	28888163	TCTxTCA	C	A	[('RPE5W22', ': ', array([ 0, 0, 35, 0]), ' ', array([ 0., 0., 1., 0.]), ' ', array([ 0., 0., 1., 0.])), ('RPE5W23', ': ', array([ 0, 0, 42, 0]), ' ', array([ 0., 0., 1., 0.]), ' ', array([ 0., 0., 1., 0.])), ('RPE5W24', ': ', array([16, 0, 23, 0]), ' ', array([ 0.41025641, 0. , 0.58974359, 0. ]), ' ', array([ 1., 0., 1., 0.])), ('RPE5W27', ': ', array([ 9, 0, 32, 0]), ' ', array([ 0.2195122, 0. …	11000000000	0.995455	0.314884	0.999661	1
294	19	29754290	ACTxCCA	G	T	[('RPE5W22', ': ', array([ 0, 0, 0, 52]), ' ', array([ 0., 0., 0., 1.]), ' ', array([ 0., 0., 0., 1.])), ('RPE5W23', ': ', array([ 1, 0, 0, 33]), ' ', array([ 0.02941176, 0. , 0. , 0.97058824]), ' ', array([ 0., 0., 0., 1.])), ('RPE5W24', ': ', array([ 1, 12, 0, 31]), ' ', array([ 0.02272727, 0.27272727, 0. , 0.70454545]), ' ', array([ 0., 1., 0., 1.])), ('RPE5W27', ': ', array([ 0, 12, 0, 30]), …	11000000000	0.986379	0.279221	0.998737	1
295	19	54337786	CCGxTCA	A	G	[('RPE5W22', ': ', array([39, 1, 0, 0]), ' ', array([ 0.975, 0.025, 0. , 0. ]), ' ', array([ 1., 0., 0., 0.])), ('RPE5W23', ': ', array([37, 0, 1, 0]), ' ', array([ 0.97368421, 0. , 0.02631579, 0. ]), ' ', array([ 1., 0., 0., 0.])), ('RPE5W24', ': ', array([22, 0, 0, 14]), ' ', array([ 0.61111111, 0. , 0. , 0.38888889]), ' ', array([ 1., 0., 0., 1.])), ('RPE5W27', ': ', array([21, 0, 1, 6]), ' ',…	11000000000	0.98995	0.301587	0.999982	1
296	20	37570061	TCAxAGA	G	T	[('RPE5W22', ': ', array([ 1, 0, 0, 61]), ' ', array([ 0.01612903, 0. , 0. , 0.98387097]), ' ', array([ 0., 0., 0., 1.])), ('RPE5W23', ': ', array([ 0, 0, 0, 38]), ' ', array([ 0., 0., 0., 1.]), ' ', array([ 0., 0., 0., 1.])), ('RPE5W24', ': ', array([ 0, 15, 0, 38]), ' ', array([ 0. , 0.28301887, 0. , 0.71698113]), ' ', array([ 0., 1., 0., 1.])), ('RPE5W27', ': ', array([ 1, 8, 0, 30]), ' ', arr…	11000000000	0.991679	0.244074	1	1
297	20	38594567	GAAxTTT	A	G	[('RPE5W22', ': ', array([80, 0, 0, 0]), ' ', array([ 1., 0., 0., 0.]), ' ', array([ 1., 0., 0., 0.])), ('RPE5W23', ': ', array([56, 0, 0, 0]), ' ', array([ 1., 0., 0., 0.]), ' ', array([ 1., 0., 0., 0.])), ('RPE5W24', ': ', array([34, 1, 0, 16]), ' ', array([ 0.66666667, 0.01960784, 0. , 0.31372549]), ' ', array([ 1., 0., 0., 1.])), ('RPE5W27', ': ', array([33, 0, 0, 20]), ' ', array([ 0.6226415…	11000000000	0.986003	0.345542	1	1
298	20	40598446	CGAxTAA	C	A	[('RPE5W22', ': ', array([ 0, 0, 72, 1]), ' ', array([ 0. , 0. , 0.98630137, 0.01369863]), ' ', array([ 0., 0., 1., 0.])), ('RPE5W23', ': ', array([ 0, 0, 53, 0]), ' ', array([ 0., 0., 1., 0.]), ' ', array([ 0., 0., 1., 0.])), ('RPE5W24', ': ', array([14, 0, 49, 0]), ' ', array([ 0.22222222, 0. , 0.77777778, 0. ]), ' ', array([ 1., 0., 1., 0.])), ('RPE5W27', ': ', array([12, 0, 37, 0]), ' ', arra…	11000000000	0.99863	0.23356	0.999996	1
299	21	25557040	GGCxAAA	A	T	[('RPE5W22', ': ', array([45, 0, 0, 0]), ' ', array([ 1., 0., 0., 0.]), ' ', array([ 1., 0., 0., 0.])), ('RPE5W23', ': ', array([36, 0, 0, 0]), ' ', array([ 1., 0., 0., 0.]), ' ', array([ 1., 0., 0., 0.])), ('RPE5W24', ': ', array([25, 11, 0, 0]), ' ', array([ 0.69444444, 0.30555556, 0. , 0. ]), ' ', array([ 1., 1., 0., 0.])), ('RPE5W27', ': ', array([17, 9, 0, 0]), ' ', array([ 0.65384615, 0.346…	11000000000	0.994368	0.325855	0.99988	1
300	X	8793815	ATTxTAA	C	A	[('RPE5W22', ': ', array([ 0, 0, 49, 0]), ' ', array([ 0., 0., 1., 0.]), ' ', array([ 0., 0., 1., 0.])), ('RPE5W23', ': ', array([ 1, 0, 38, 0]), ' ', array([ 0.02564103, 0. , 0.97435897, 0. ]), ' ', array([ 0., 0., 1., 0.])), ('RPE5W24', ': ', array([16, 0, 27, 0]), ' ', array([ 0.37209302, 0. , 0.62790698, 0. ]), ' ', array([ 1., 0., 1., 0.])), ('RPE5W27', ': ', array([15, 0, 25, 0]), ' ', arra…	11000000000	0.992965	0.373547	1	1
301	X	22386555	TTAxTCT	G	C	[('RPE5W22', ': ', array([ 0, 0, 0, 43]), ' ', array([ 0., 0., 0., 1.]), ' ', array([ 0., 0., 0., 1.])), ('RPE5W23', ': ', array([ 0, 0, 0, 51]), ' ', array([ 0., 0., 0., 1.]), ' ', array([ 0., 0., 0., 1.])), ('RPE5W24', ': ', array([ 0, 1, 12, 33]), ' ', array([ 0. , 0.02173913, 0.26086957, 0.7173913 ]), ' ', array([ 0., 0., 1., 1.])), ('RPE5W27', ': ', array([ 0, 0, 11, 18]), ' ', array([ 0. , …	11000000000	0.987667	0.32009	0.999979	1
302	X	27005381	CAAxAGC	T	G	[('RPE5W22', ': ', array([ 0, 70, 0, 0]), ' ', array([ 0., 1., 0., 0.]), ' ', array([ 0., 1., 0., 0.])), ('RPE5W23', ': ', array([ 0, 31, 0, 0]), ' ', array([ 0., 1., 0., 0.]), ' ', array([ 0., 1., 0., 0.])), ('RPE5W24', ': ', array([ 0, 29, 0, 12]), ' ', array([ 0. , 0.70731707, 0. , 0.29268293]), ' ', array([ 0., 1., 0., 1.])), ('RPE5W27', ': ', array([ 0, 24, 0, 11]), ' ', array([ 0. , 0.68571…	11000000000	0.995501	0.303484	0.999993	1
303	X	36618722	ACCxTTT	A	G	[('RPE5W22', ': ', array([51, 1, 0, 0]), ' ', array([ 0.98076923, 0.01923077, 0. , 0. ]), ' ', array([ 1., 0., 0., 0.])), ('RPE5W23', ': ', array([47, 0, 0, 0]), ' ', array([ 1., 0., 0., 0.]), ' ', array([ 1., 0., 0., 0.])), ('RPE5W24', ': ', array([22, 0, 0, 15]), ' ', array([ 0.59459459, 0. , 0. , 0.40540541]), ' ', array([ 1., 0., 0., 1.])), ('RPE5W27', ': ', array([31, 1, 0, 12]), ' ', array(…	11000000000	0.993416	0.339066	1	1
304	X	93490377	AATxTTT	A	G	[('RPE5W22', ': ', array([51, 0, 0, 1]), ' ', array([ 0.98076923, 0. , 0. , 0.01923077]), ' ', array([ 1., 0., 0., 0.])), ('RPE5W23', ': ', array([40, 0, 0, 0]), ' ', array([ 1., 0., 0., 0.]), ' ', array([ 1., 0., 0., 0.])), ('RPE5W24', ': ', array([32, 0, 0, 11]), ' ', array([ 0.74418605, 0. , 0. , 0.25581395]), ' ', array([ 1., 0., 0., 1.])), ('RPE5W27', ': ', array([28, 0, 1, 6]), ' ', array([…	11000000000	0.994077	0.213621	0.994611	1
305	X	94653568	GGCxATG	G	A	[('RPE5W22', ': ', array([ 0, 0, 1, 54]), ' ', array([ 0. , 0. , 0.01818182, 0.98181818]), ' ', array([ 0., 0., 0., 1.])), ('RPE5W23', ': ', array([ 1, 0, 0, 43]), ' ', array([ 0.02272727, 0. , 0. , 0.97727273]), ' ', array([ 0., 0., 0., 1.])), ('RPE5W24', ': ', array([11, 0, 0, 18]), ' ', array([ 0.37931034, 0. , 0. , 0.62068966]), ' ', array([ 1., 0., 0., 1.])), ('RPE5W27', ': ', array([11, 0, …	11000000000	0.998182	0.338304	1	1
306	X	95046794	AAAxACC	C	G	[('RPE5W22', ': ', array([ 2, 0, 51, 0]), ' ', array([ 0.03773585, 0. , 0.96226415, 0. ]), ' ', array([ 0., 0., 1., 0.])), ('RPE5W23', ': ', array([ 0, 0, 35, 0]), ' ', array([ 0., 0., 1., 0.]), ' ', array([ 0., 0., 1., 0.])), ('RPE5W24', ': ', array([ 0, 0, 29, 11]), ' ', array([ 0. , 0. , 0.725, 0.275]), ' ', array([ 0., 0., 1., 1.])), ('RPE5W27', ': ', array([ 1, 0, 27, 10]), ' ', array([ 0.02…	11000000000	0.991155	0.269079	0.99928	1
307	X	99721536	TTTxGGA	G	T	[('RPE5W22', ': ', array([ 0, 0, 0, 56]), ' ', array([ 0., 0., 0., 1.]), ' ', array([ 0., 0., 0., 1.])), ('RPE5W23', ': ', array([ 0, 1, 0, 38]), ' ', array([ 0. , 0.02564103, 0. , 0.97435897]), ' ', array([ 0., 0., 0., 1.])), ('RPE5W24', ': ', array([ 0, 12, 0, 22]), ' ', array([ 0. , 0.35294118, 0. , 0.64705882]), ' ', array([ 0., 1., 0., 1.])), ('RPE5W27', ': ', array([ 0, 12, 0, 28]), ' ', ar…	11000000000	0.989273	0.326471	0.999999	1
308	X	141422785	AAAxGTC	G	T	[('RPE5W22', ': ', array([ 0, 0, 1, 53]), ' ', array([ 0. , 0. , 0.01851852, 0.98148148]), ' ', array([ 0., 0., 0., 1.])), ('RPE5W23', ': ', array([ 0, 1, 0, 33]), ' ', array([ 0. , 0.02941176, 0. , 0.97058824]), ' ', array([ 0., 0., 0., 1.])), ('RPE5W24', ': ', array([ 0, 13, 0, 33]), ' ', array([ 0. , 0.2826087, 0. , 0.7173913]), ' ', array([ 0., 1., 0., 1.])), ('RPE5W27', ': ', array([ 0, 10, …	11000000000	0.989726	0.292819	0.999995	1
309	X	143756695	AGTxATG	G	C	[('RPE5W22', ': ', array([ 0, 0, 0, 55]), ' ', array([ 0., 0., 0., 1.]), ' ', array([ 0., 0., 0., 1.])), ('RPE5W23', ': ', array([ 0, 0, 0, 28]), ' ', array([ 0., 0., 0., 1.]), ' ', array([ 0., 0., 0., 1.])), ('RPE5W24', ': ', array([ 0, 0, 10, 27]), ' ', array([ 0. , 0. , 0.27027027, 0.72972973]), ' ', array([ 0., 0., 1., 1.])), ('RPE5W27', ': ', array([ 0, 0, 14, 32]), ' ', array([ 0. , 0. , 0.…	11000000000	0.997059	0.287309	0.999875	1
310	X	144764897	GCAxAAC	G	T	[('RPE5W22', ': ', array([ 0, 0, 0, 47]), ' ', array([ 0., 0., 0., 1.]), ' ', array([ 0., 0., 0., 1.])), ('RPE5W23', ': ', array([ 0, 0, 0, 52]), ' ', array([ 0., 0., 0., 1.]), ' ', array([ 0., 0., 0., 1.])), ('RPE5W24', ': ', array([ 0, 15, 0, 23]), ' ', array([ 0. , 0.39473684, 0. , 0.60526316]), ' ', array([ 0., 1., 0., 1.])), ('RPE5W27', ': ', array([ 0, 10, 0, 23]), ' ', array([ 0. , 0.30303…	11000000000	0.983178	0.348884	0.999911	1
311	2	202084468	TTTxTCT	C	T	[('RPE5W22', ': ', array([ 0, 4, 33, 0]), ' ', array([ 0. , 0.10810811, 0.89189189, 0. ]), ' ', array([ 0., 0., 1., 0.])), ('RPE5W23', ': ', array([ 0, 3, 29, 0]), ' ', array([ 0. , 0.09375, 0.90625, 0. ]), ' ', array([ 0., 0., 1., 0.])), ('RPE5W24', ': ', array([ 0, 8, 24, 0]), ' ', array([ 0. , 0.25, 0.75, 0. ]), ' ', array([ 0., 1., 1., 0.])), ('RPE5W27', ': ', array([ 0, 9, 11, 0]), ' ', arra…	11000000000	0.936451	0.35	0.996292	1
312	10	93392149	TTGxTTT	G	T	[('RPE5W22', ': ', array([ 0, 1, 1, 69]), ' ', array([ 0. , 0.01408451, 0.01408451, 0.97183099]), ' ', array([ 0., 0., 0., 1.])), ('RPE5W23', ': ', array([ 0, 3, 0, 52]), ' ', array([ 0. , 0.05454545, 0. , 0.94545455]), ' ', array([ 0., 0., 0., 1.])), ('RPE5W24', ': ', array([ 0, 7, 0, 35]), ' ', array([ 0. , 0.16666667, 0. , 0.83333333]), ' ', array([ 0., 0., 0., 1.])), ('RPE5W27', ': ', array([…	11000000000	0.972853	0.208333	0.999444	1
313	20	38596520	AACxGTC	A	G	[('RPE5W22', ': ', array([65, 0, 0, 0]), ' ', array([ 1., 0., 0., 0.]), ' ', array([ 1., 0., 0., 0.])), ('RPE5W23', ': ', array([41, 0, 0, 0]), ' ', array([ 1., 0., 0., 0.]), ' ', array([ 1., 0., 0., 0.])), ('RPE5W24', ': ', array([52, 0, 0, 11]), ' ', array([ 0.82539683, 0. , 0. , 0.17460317]), ' ', array([ 1., 0., 0., 0.])), ('RPE5W27', ': ', array([38, 1, 0, 12]), ' ', array([ 0.74509804, 0.01…	11000000000	0.993456	0.204949	0.998965	1
314	1	9454160	GGAxAGC	G	T	[('RPE5W22', ': ', array([ 0, 0, 0, 58]), ' ', array([ 0., 0., 0., 1.]), ' ', array([ 0., 0., 0., 1.])), ('RPE5W23', ': ', array([ 0, 0, 0, 43]), ' ', array([ 0., 0., 0., 1.]), ' ', array([ 0., 0., 0., 1.])), ('RPE5W24', ': ', array([ 0, 0, 0, 41]), ' ', array([ 0., 0., 0., 1.]), ' ', array([ 0., 0., 0., 1.])), ('RPE5W27', ': ', array([ 0, 0, 0, 40]), ' ', array([ 0., 0., 0., 1.]), ' ', array([ 0…	110	1	0.283108	0.999833	1
315	1	16791585	TGGxTGT	C	T	[('RPE5W22', ': ', array([ 0, 0, 58, 0]), ' ', array([ 0., 0., 1., 0.]), ' ', array([ 0., 0., 1., 0.])), ('RPE5W23', ': ', array([ 0, 0, 55, 0]), ' ', array([ 0., 0., 1., 0.]), ' ', array([ 0., 0., 1., 0.])), ('RPE5W24', ': ', array([ 0, 0, 38, 0]), ' ', array([ 0., 0., 1., 0.]), ' ', array([ 0., 0., 1., 0.])), ('RPE5W27', ': ', array([ 0, 0, 29, 0]), ' ', array([ 0., 0., 1., 0.]), ' ', array([ 0…	1110	1	0.342099	1	1
316	1	69776673	GGAxTAT	G	T	[('RPE5W22', ': ', array([ 0, 0, 0, 50]), ' ', array([ 0., 0., 0., 1.]), ' ', array([ 0., 0., 0., 1.])), ('RPE5W23', ': ', array([ 0, 1, 0, 36]), ' ', array([ 0. , 0.02702703, 0. , 0.97297297]), ' ', array([ 0., 0., 0., 1.])), ('RPE5W24', ': ', array([ 0, 0, 0, 37]), ' ', array([ 0., 0., 0., 1.]), ' ', array([ 0., 0., 0., 1.])), ('RPE5W27', ': ', array([ 0, 0, 0, 33]), ' ', array([ 0., 0., 0., 1.…	1110	1	0.422063	1	1
317	1	71756188	ATTxAGT	C	T	[('RPE5W22', ': ', array([ 0, 0, 61, 1]), ' ', array([ 0. , 0. , 0.98387097, 0.01612903]), ' ', array([ 0., 0., 1., 0.])), ('RPE5W23', ': ', array([ 0, 0, 32, 0]), ' ', array([ 0., 0., 1., 0.]), ' ', array([ 0., 0., 1., 0.])), ('RPE5W24', ': ', array([ 1, 0, 43, 0]), ' ', array([ 0.02272727, 0. , 0.97727273, 0. ]), ' ', array([ 0., 0., 1., 0.])), ('RPE5W27', ': ', array([ 0, 0, 37, 0]), ' ', arra…	1110	0.987611	0.313632	1	1
318	1	155958636	GTTxAGC	C	A	[('RPE5W22', ': ', array([ 1, 0, 50, 0]), ' ', array([ 0.01960784, 0. , 0.98039216, 0. ]), ' ', array([ 0., 0., 1., 0.])), ('RPE5W23', ': ', array([ 1, 0, 39, 0]), ' ', array([ 0.025, 0. , 0.975, 0. ]), ' ', array([ 0., 0., 1., 0.])), ('RPE5W24', ': ', array([ 0, 0, 36, 0]), ' ', array([ 0., 0., 1., 0.]), ' ', array([ 0., 0., 1., 0.])), ('RPE5W27', ': ', array([ 0, 0, 29, 0]), ' ', array([ 0., 0.…	1110	0.997821	0.26996	0.994525	1
319	1	177029144	TGTxACA	G	T	[('RPE5W22', ': ', array([ 0, 0, 0, 54]), ' ', array([ 0., 0., 0., 1.]), ' ', array([ 0., 0., 0., 1.])), ('RPE5W23', ': ', array([ 0, 0, 0, 38]), ' ', array([ 0., 0., 0., 1.]), ' ', array([ 0., 0., 0., 1.])), ('RPE5W24', ': ', array([ 0, 0, 0, 38]), ' ', array([ 0., 0., 0., 1.]), ' ', array([ 0., 0., 0., 1.])), ('RPE5W27', ': ', array([ 0, 1, 0, 35]), ' ', array([ 0. , 0.02777778, 0. , 0.97222222…	110	0.986032	0.284562	0.999977	1
320	1	178284399	TGTxTTT	C	A	[('RPE5W22', ': ', array([ 0, 0, 64, 0]), ' ', array([ 0., 0., 1., 0.]), ' ', array([ 0., 0., 1., 0.])), ('RPE5W23', ': ', array([ 0, 0, 41, 0]), ' ', array([ 0., 0., 1., 0.]), ' ', array([ 0., 0., 1., 0.])), ('RPE5W24', ': ', array([ 0, 0, 37, 0]), ' ', array([ 0., 0., 1., 0.]), ' ', array([ 0., 0., 1., 0.])), ('RPE5W27', ': ', array([ 0, 0, 54, 0]), ' ', array([ 0., 0., 1., 0.]), ' ', array([ 0…	110	0.996774	0.251414	0.999174	1
321	1	222984664	AGGxATT	A	G	[('RPE5W22', ': ', array([56, 1, 0, 0]), ' ', array([ 0.98245614, 0.01754386, 0. , 0. ]), ' ', array([ 1., 0., 0., 0.])), ('RPE5W23', ': ', array([41, 0, 0, 0]), ' ', array([ 1., 0., 0., 0.]), ' ', array([ 1., 0., 0., 0.])), ('RPE5W24', ': ', array([42, 0, 0, 0]), ' ', array([ 1., 0., 0., 0.]), ' ', array([ 1., 0., 0., 0.])), ('RPE5W27', ': ', array([36, 0, 0, 0]), ' ', array([ 1., 0., 0., 0.]), …	110	0.990176	0.3375	0.999999	1
322	1	247705616	AAAxCAA	G	T	[('RPE5W22', ': ', array([ 1, 0, 0, 50]), ' ', array([ 0.01960784, 0. , 0. , 0.98039216]), ' ', array([ 0., 0., 0., 1.])), ('RPE5W23', ': ', array([ 0, 0, 0, 42]), ' ', array([ 0., 0., 0., 1.]), ' ', array([ 0., 0., 0., 1.])), ('RPE5W24', ': ', array([ 0, 0, 0, 30]), ' ', array([ 0., 0., 0., 1.]), ' ', array([ 0., 0., 0., 1.])), ('RPE5W27', ': ', array([ 0, 0, 0, 47]), ' ', array([ 0., 0., 0., 1.…	1110	0.993548	0.33999	0.999997	1
323	2	51044234	ATTxAGT	T	G	[('RPE5W22', ': ', array([ 0, 53, 0, 0]), ' ', array([ 0., 1., 0., 0.]), ' ', array([ 0., 1., 0., 0.])), ('RPE5W23', ': ', array([ 0, 29, 0, 0]), ' ', array([ 0., 1., 0., 0.]), ' ', array([ 0., 1., 0., 0.])), ('RPE5W24', ': ', array([ 0, 36, 0, 0]), ' ', array([ 0., 1., 0., 0.]), ' ', array([ 0., 1., 0., 0.])), ('RPE5W27', ': ', array([ 0, 27, 1, 0]), ' ', array([ 0. , 0.96428571, 0.03571429, 0. …	110	0.996429	0.425894	0.999997	1
324	2	80582430	AGCxGAA	A	G	[('RPE5W22', ': ', array([57, 0, 0, 0]), ' ', array([ 1., 0., 0., 0.]), ' ', array([ 1., 0., 0., 0.])), ('RPE5W23', ': ', array([39, 0, 0, 0]), ' ', array([ 1., 0., 0., 0.]), ' ', array([ 1., 0., 0., 0.])), ('RPE5W24', ': ', array([36, 0, 0, 0]), ' ', array([ 1., 0., 0., 0.]), ' ', array([ 1., 0., 0., 0.])), ('RPE5W27', ': ', array([37, 0, 0, 0]), ' ', array([ 1., 0., 0., 0.]), ' ', array([ 1., 0…	1110	0.989883	0.263993	0.990327	1
325	2	107053962	CTCxGTC	T	A	[('RPE5W22', ': ', array([ 0, 49, 0, 2]), ' ', array([ 0. , 0.96078431, 0. , 0.03921569]), ' ', array([ 0., 1., 0., 0.])), ('RPE5W23', ': ', array([ 0, 35, 0, 0]), ' ', array([ 0., 1., 0., 0.]), ' ', array([ 0., 1., 0., 0.])), ('RPE5W24', ': ', array([ 0, 40, 0, 1]), ' ', array([ 0. , 0.97560976, 0. , 0.02439024]), ' ', array([ 0., 1., 0., 0.])), ('RPE5W27', ': ', array([ 0, 37, 0, 0]), ' ', arra…	110	0.981511	0.401042	1	1
326	2	132605164	GGCxGAG	C	T	[('RPE5W22', ': ', array([ 0, 0, 46, 0]), ' ', array([ 0., 0., 1., 0.]), ' ', array([ 0., 0., 1., 0.])), ('RPE5W23', ': ', array([ 1, 0, 32, 0]), ' ', array([ 0.03030303, 0. , 0.96969697, 0. ]), ' ', array([ 0., 0., 1., 0.])), ('RPE5W24', ': ', array([ 0, 0, 46, 0]), ' ', array([ 0., 0., 1., 0.]), ' ', array([ 0., 0., 1., 0.])), ('RPE5W27', ': ', array([ 1, 0, 44, 0]), ' ', array([ 0.02222222, 0.…	110	0.99433	0.383704	1	1
327	2	147980652	CAGxAAT	C	A	[('RPE5W22', ': ', array([ 0, 0, 60, 0]), ' ', array([ 0., 0., 1., 0.]), ' ', array([ 0., 0., 1., 0.])), ('RPE5W23', ': ', array([ 0, 0, 33, 0]), ' ', array([ 0., 0., 1., 0.]), ' ', array([ 0., 0., 1., 0.])), ('RPE5W24', ': ', array([ 0, 0, 54, 0]), ' ', array([ 0., 0., 1., 0.]), ' ', array([ 0., 0., 1., 0.])), ('RPE5W27', ': ', array([ 0, 0, 44, 0]), ' ', array([ 0., 0., 1., 0.]), ' ', array([ 0…	110	0.994858	0.394512	1	1
328	2	151170688	ATGxTTT	A	T	[('RPE5W22', ': ', array([47, 0, 0, 0]), ' ', array([ 1., 0., 0., 0.]), ' ', array([ 1., 0., 0., 0.])), ('RPE5W23', ': ', array([30, 0, 1, 0]), ' ', array([ 0.96774194, 0. , 0.03225806, 0. ]), ' ', array([ 1., 0., 0., 0.])), ('RPE5W24', ': ', array([41, 0, 1, 0]), ' ', array([ 0.97619048, 0. , 0.02380952, 0. ]), ' ', array([ 1., 0., 0., 0.])), ('RPE5W27', ': ', array([37, 0, 1, 0]), ' ', array([ …	110	0.989423	0.2625	0.999987	1
329	2	205230081	ATTxGGG	G	T	[('RPE5W22', ': ', array([ 0, 0, 0, 65]), ' ', array([ 0., 0., 0., 1.]), ' ', array([ 0., 0., 0., 1.])), ('RPE5W23', ': ', array([ 0, 0, 0, 42]), ' ', array([ 0., 0., 0., 1.]), ' ', array([ 0., 0., 0., 1.])), ('RPE5W24', ': ', array([ 0, 0, 0, 31]), ' ', array([ 0., 0., 0., 1.]), ' ', array([ 0., 0., 0., 1.])), ('RPE5W27', ': ', array([ 0, 0, 0, 33]), ' ', array([ 0., 0., 0., 1.]), ' ', array([ 0…	1110	1	0.361479	1	1
330	2	226053026	GGAxAGT	T	C	[('RPE5W22', ': ', array([ 0, 48, 0, 0]), ' ', array([ 0., 1., 0., 0.]), ' ', array([ 0., 1., 0., 0.])), ('RPE5W23', ': ', array([ 0, 43, 0, 0]), ' ', array([ 0., 1., 0., 0.]), ' ', array([ 0., 1., 0., 0.])), ('RPE5W24', ': ', array([ 0, 34, 0, 0]), ' ', array([ 0., 1., 0., 0.]), ' ', array([ 0., 1., 0., 0.])), ('RPE5W27', ': ', array([ 0, 35, 0, 0]), ' ', array([ 0., 1., 0., 0.]), ' ', array([ 0…	110	0.993917	0.423103	1	1
331	3	72461007	AAAxGCA	T	C	[('RPE5W22', ': ', array([ 0, 53, 0, 0]), ' ', array([ 0., 1., 0., 0.]), ' ', array([ 0., 1., 0., 0.])), ('RPE5W23', ': ', array([ 0, 34, 1, 0]), ' ', array([ 0. , 0.97142857, 0.02857143, 0. ]), ' ', array([ 0., 1., 0., 0.])), ('RPE5W24', ': ', array([ 0, 39, 0, 0]), ' ', array([ 0., 1., 0., 0.]), ' ', array([ 0., 1., 0., 0.])), ('RPE5W27', ': ', array([ 0, 40, 0, 0]), ' ', array([ 0., 1., 0., 0.…	110	0.983036	0.291071	0.999989	1
332	3	151173901	TAAxGGA	A	T	[('RPE5W22', ': ', array([56, 0, 0, 0]), ' ', array([ 1., 0., 0., 0.]), ' ', array([ 1., 0., 0., 0.])), ('RPE5W23', ': ', array([35, 0, 0, 0]), ' ', array([ 1., 0., 0., 0.]), ' ', array([ 1., 0., 0., 0.])), ('RPE5W24', ': ', array([34, 0, 0, 0]), ' ', array([ 1., 0., 0., 0.]), ' ', array([ 1., 0., 0., 0.])), ('RPE5W27', ': ', array([48, 0, 0, 1]), ' ', array([ 0.97959184, 0. , 0. , 0.02040816]), …	1110	0.997732	0.341117	1	1
333	3	191415857	TTGxTTT	G	C	[('RPE5W22', ': ', array([ 0, 0, 0, 55]), ' ', array([ 0., 0., 0., 1.]), ' ', array([ 0., 0., 0., 1.])), ('RPE5W23', ': ', array([ 1, 0, 0, 44]), ' ', array([ 0.02222222, 0. , 0. , 0.97777778]), ' ', array([ 0., 0., 0., 1.])), ('RPE5W24', ': ', array([ 0, 1, 0, 43]), ' ', array([ 0. , 0.02272727, 0. , 0.97727273]), ' ', array([ 0., 0., 0., 1.])), ('RPE5W27', ': ', array([ 0, 0, 0, 38]), ' ', arra…	1110	0.997475	0.339476	0.999989	1
334	4	7439579	CCTxCTT	C	A	[('RPE5W22', ': ', array([ 1, 0, 35, 0]), ' ', array([ 0.02777778, 0. , 0.97222222, 0. ]), ' ', array([ 0., 0., 1., 0.])), ('RPE5W23', ': ', array([ 0, 0, 34, 0]), ' ', array([ 0., 0., 1., 0.]), ' ', array([ 0., 0., 1., 0.])), ('RPE5W24', ': ', array([ 0, 0, 31, 0]), ' ', array([ 0., 0., 1., 0.]), ' ', array([ 0., 0., 1., 0.])), ('RPE5W27', ': ', array([ 0, 0, 37, 1]), ' ', array([ 0. , 0. , 0.97…	110	0.994591	0.373377	1	1
335	4	36772065	AGAxCAA	G	A	[('RPE5W22', ': ', array([ 0, 0, 0, 57]), ' ', array([ 0., 0., 0., 1.]), ' ', array([ 0., 0., 0., 1.])), ('RPE5W23', ': ', array([ 0, 0, 0, 39]), ' ', array([ 0., 0., 0., 1.]), ' ', array([ 0., 0., 0., 1.])), ('RPE5W24', ': ', array([ 0, 0, 0, 30]), ' ', array([ 0., 0., 0., 1.]), ' ', array([ 0., 0., 0., 1.])), ('RPE5W27', ': ', array([ 0, 0, 0, 32]), ' ', array([ 0., 0., 0., 1.]), ' ', array([ 0…	1110	1	0.375263	1	1
336	4	60297675	CGCxACC	T	A	[('RPE5W22', ': ', array([ 0, 40, 0, 0]), ' ', array([ 0., 1., 0., 0.]), ' ', array([ 0., 1., 0., 0.])), ('RPE5W23', ': ', array([ 0, 28, 1, 1]), ' ', array([ 0. , 0.93333333, 0.03333333, 0.03333333]), ' ', array([ 0., 1., 0., 0.])), ('RPE5W24', ': ', array([ 0, 33, 0, 3]), ' ', array([ 0. , 0.91666667, 0. , 0.08333333]), ' ', array([ 0., 1., 0., 0.])), ('RPE5W27', ': ', array([ 0, 33, 0, 0]), ' …	1110	0.987963	0.360563	0.999971	1
337	4	68538940	CCTxGCC	G	A	[('RPE5W22', ': ', array([ 0, 0, 0, 50]), ' ', array([ 0., 0., 0., 1.]), ' ', array([ 0., 0., 0., 1.])), ('RPE5W23', ': ', array([ 0, 0, 0, 26]), ' ', array([ 0., 0., 0., 1.]), ' ', array([ 0., 0., 0., 1.])), ('RPE5W24', ': ', array([ 0, 0, 0, 29]), ' ', array([ 0., 0., 0., 1.]), ' ', array([ 0., 0., 0., 1.])), ('RPE5W27', ': ', array([ 0, 0, 1, 29]), ' ', array([ 0. , 0. , 0.03333333, 0.96666667…	110	0.996667	0.330966	0.999999	1
338	4	92552544	TTTxTTG	C	A	[('RPE5W22', ': ', array([ 0, 0, 39, 0]), ' ', array([ 0., 0., 1., 0.]), ' ', array([ 0., 0., 1., 0.])), ('RPE5W23', ': ', array([ 1, 0, 37, 0]), ' ', array([ 0.02631579, 0. , 0.97368421, 0. ]), ' ', array([ 0., 0., 1., 0.])), ('RPE5W24', ': ', array([ 1, 0, 41, 0]), ' ', array([ 0.02380952, 0. , 0.97619048, 0. ]), ' ', array([ 0., 0., 1., 0.])), ('RPE5W27', ': ', array([ 0, 0, 37, 0]), ' ', arra…	110	0.997619	0.27619	0.999937	1
339	4	184005686	GCAxATG	G	T	[('RPE5W22', ': ', array([ 0, 0, 0, 57]), ' ', array([ 0., 0., 0., 1.]), ' ', array([ 0., 0., 0., 1.])), ('RPE5W23', ': ', array([ 0, 0, 2, 39]), ' ', array([ 0. , 0. , 0.04878049, 0.95121951]), ' ', array([ 0., 0., 0., 1.])), ('RPE5W24', ': ', array([ 0, 1, 0, 38]), ' ', array([ 0. , 0.02564103, 0. , 0.97435897]), ' ', array([ 0., 0., 0., 1.])), ('RPE5W27', ': ', array([ 0, 0, 0, 46]), ' ', arra…	110	0.991771	0.227743	0.998347	1
340	5	9467911	CTGxCTG	C	A	[('RPE5W22', ': ', array([ 1, 0, 71, 0]), ' ', array([ 0.01388889, 0. , 0.98611111, 0. ]), ' ', array([ 0., 0., 1., 0.])), ('RPE5W23', ': ', array([ 0, 0, 56, 0]), ' ', array([ 0., 0., 1., 0.]), ' ', array([ 0., 0., 1., 0.])), ('RPE5W24', ': ', array([ 0, 0, 51, 0]), ' ', array([ 0., 0., 1., 0.]), ' ', array([ 0., 0., 1., 0.])), ('RPE5W27', ': ', array([ 0, 0, 43, 0]), ' ', array([ 0., 0., 1., 0.…	1110	0.995932	0.259226	0.999979	1
341	5	18850729	CTGxCTG	G	T	[('RPE5W22', ': ', array([ 0, 0, 0, 72]), ' ', array([ 0., 0., 0., 1.]), ' ', array([ 0., 0., 0., 1.])), ('RPE5W23', ': ', array([ 0, 0, 0, 57]), ' ', array([ 0., 0., 0., 1.]), ' ', array([ 0., 0., 0., 1.])), ('RPE5W24', ': ', array([ 0, 0, 0, 47]), ' ', array([ 0., 0., 0., 1.]), ' ', array([ 0., 0., 0., 1.])), ('RPE5W27', ': ', array([ 0, 0, 0, 50]), ' ', array([ 0., 0., 0., 1.]), ' ', array([ 0…	110	0.992952	0.190508	0.999947	1
342	5	18851326	TTCxGAG	A	T	[('RPE5W22', ': ', array([67, 0, 0, 0]), ' ', array([ 1., 0., 0., 0.]), ' ', array([ 1., 0., 0., 0.])), ('RPE5W23', ': ', array([64, 0, 0, 0]), ' ', array([ 1., 0., 0., 0.]), ' ', array([ 1., 0., 0., 0.])), ('RPE5W24', ': ', array([49, 1, 0, 1]), ' ', array([ 0.96078431, 0.01960784, 0. , 0.01960784]), ' ', array([ 1., 0., 0., 0.])), ('RPE5W27', ': ', array([60, 1, 0, 0]), ' ', array([ 0.98360656,…	110	0.992478	0.179562	0.999766	1
343	5	27108509	TTTxTAT	A	C	[('RPE5W22', ': ', array([68, 0, 0, 0]), ' ', array([ 1., 0., 0., 0.]), ' ', array([ 1., 0., 0., 0.])), ('RPE5W23', ': ', array([33, 0, 0, 0]), ' ', array([ 1., 0., 0., 0.]), ' ', array([ 1., 0., 0., 0.])), ('RPE5W24', ': ', array([37, 0, 0, 0]), ' ', array([ 1., 0., 0., 0.]), ' ', array([ 1., 0., 0., 0.])), ('RPE5W27', ': ', array([53, 0, 1, 1]), ' ', array([ 0.96363636, 0. , 0.01818182, 0.01818…	110	0.992404	0.195745	0.999695	1
344	5	35226384	AGTxGTG	T	C	[('RPE5W22', ': ', array([ 0, 71, 0, 1]), ' ', array([ 0. , 0.98611111, 0. , 0.01388889]), ' ', array([ 0., 1., 0., 0.])), ('RPE5W23', ': ', array([ 0, 53, 0, 0]), ' ', array([ 0., 1., 0., 0.]), ' ', array([ 0., 1., 0., 0.])), ('RPE5W24', ': ', array([ 0, 77, 0, 0]), ' ', array([ 0., 1., 0., 0.]), ' ', array([ 0., 1., 0., 0.])), ('RPE5W27', ': ', array([ 0, 61, 0, 0]), ' ', array([ 0., 1., 0., 0.…	110	0.989963	0.272215	1	1
345	5	58212179	CTGxAAT	G	T	[('RPE5W22', ': ', array([ 0, 0, 0, 69]), ' ', array([ 0., 0., 0., 1.]), ' ', array([ 0., 0., 0., 1.])), ('RPE5W23', ': ', array([ 1, 0, 1, 47]), ' ', array([ 0.02040816, 0. , 0.02040816, 0.95918367]), ' ', array([ 0., 0., 0., 1.])), ('RPE5W24', ': ', array([ 0, 0, 0, 55]), ' ', array([ 0., 0., 0., 1.]), ' ', array([ 0., 0., 0., 1.])), ('RPE5W27', ': ', array([ 0, 1, 1, 45]), ' ', array([ 0. , 0.…	1110	0.987579	0.257906	0.999995	1
346	5	60796166	CAGxCTG	G	A	[('RPE5W22', ': ', array([ 0, 0, 0, 53]), ' ', array([ 0., 0., 0., 1.]), ' ', array([ 0., 0., 0., 1.])), ('RPE5W23', ': ', array([ 0, 0, 1, 50]), ' ', array([ 0. , 0. , 0.01960784, 0.98039216]), ' ', array([ 0., 0., 0., 1.])), ('RPE5W24', ': ', array([ 0, 0, 0, 43]), ' ', array([ 0., 0., 0., 1.]), ' ', array([ 0., 0., 0., 1.])), ('RPE5W27', ': ', array([ 0, 0, 0, 39]), ' ', array([ 0., 0., 0., 1.…	1110	0.993178	0.202763	0.999987	1
347	5	105501680	CTTxAAG	G	T	[('RPE5W22', ': ', array([ 0, 1, 2, 71]), ' ', array([ 0. , 0.01351351, 0.02702703, 0.95945946]), ' ', array([ 0., 0., 0., 1.])), ('RPE5W23', ': ', array([ 0, 0, 0, 40]), ' ', array([ 0., 0., 0., 1.]), ' ', array([ 0., 0., 0., 1.])), ('RPE5W24', ': ', array([ 1, 0, 0, 65]), ' ', array([ 0.01515152, 0. , 0. , 0.98484848]), ' ', array([ 0., 0., 0., 1.])), ('RPE5W27', ': ', array([ 0, 0, 0, 48]), ' …	1110	0.986296	0.209282	0.999942	1
348	5	115310726	ATTxATT	C	T	[('RPE5W22', ': ', array([ 1, 0, 75, 0]), ' ', array([ 0.01315789, 0. , 0.98684211, 0. ]), ' ', array([ 0., 0., 1., 0.])), ('RPE5W23', ': ', array([ 1, 0, 49, 0]), ' ', array([ 0.02, 0. , 0.98, 0. ]), ' ', array([ 0., 0., 1., 0.])), ('RPE5W24', ': ', array([ 0, 0, 50, 0]), ' ', array([ 0., 0., 1., 0.]), ' ', array([ 0., 0., 1., 0.])), ('RPE5W27', ': ', array([ 0, 0, 62, 0]), ' ', array([ 0., 0., …	1110	0.991145	0.267484	0.999999	1
349	5	165438166	ATTxATG	G	T	[('RPE5W22', ': ', array([ 0, 1, 0, 84]), ' ', array([ 0. , 0.01176471, 0. , 0.98823529]), ' ', array([ 0., 0., 0., 1.])), ('RPE5W23', ': ', array([ 0, 0, 0, 46]), ' ', array([ 0., 0., 0., 1.]), ' ', array([ 0., 0., 0., 1.])), ('RPE5W24', ': ', array([ 0, 0, 0, 57]), ' ', array([ 0., 0., 0., 1.]), ' ', array([ 0., 0., 0., 1.])), ('RPE5W27', ': ', array([ 0, 1, 0, 52]), ' ', array([ 0. , 0.0188679…	110	0.989241	0.220462	0.999725	1
350	6	10676600	GCTxTTC	T	C	[('RPE5W22', ': ', array([ 0, 51, 0, 1]), ' ', array([ 0. , 0.98076923, 0. , 0.01923077]), ' ', array([ 0., 1., 0., 0.])), ('RPE5W23', ': ', array([ 0, 42, 0, 0]), ' ', array([ 0., 1., 0., 0.]), ' ', array([ 0., 1., 0., 0.])), ('RPE5W24', ': ', array([ 0, 34, 0, 1]), ' ', array([ 0. , 0.97142857, 0. , 0.02857143]), ' ', array([ 0., 1., 0., 0.])), ('RPE5W27', ': ', array([ 0, 40, 0, 0]), ' ', arra…	1110	0.994689	0.299665	0.999989	1
351	6	40790948	GCAxCTC	G	T	[('RPE5W22', ': ', array([ 0, 0, 0, 51]), ' ', array([ 0., 0., 0., 1.]), ' ', array([ 0., 0., 0., 1.])), ('RPE5W23', ': ', array([ 0, 1, 0, 46]), ' ', array([ 0. , 0.0212766, 0. , 0.9787234]), ' ', array([ 0., 0., 0., 1.])), ('RPE5W24', ': ', array([ 0, 0, 0, 32]), ' ', array([ 0., 0., 0., 1.]), ' ', array([ 0., 0., 0., 1.])), ('RPE5W27', ': ', array([ 0, 0, 0, 31]), ' ', array([ 0., 0., 0., 1.])…	1110	1	0.32275	0.999987	1
352	6	80068985	TCGxACT	C	T	[('RPE5W22', ': ', array([ 0, 0, 44, 0]), ' ', array([ 0., 0., 1., 0.]), ' ', array([ 0., 0., 1., 0.])), ('RPE5W23', ': ', array([ 0, 0, 33, 0]), ' ', array([ 0., 0., 1., 0.]), ' ', array([ 0., 0., 1., 0.])), ('RPE5W24', ': ', array([ 0, 0, 41, 0]), ' ', array([ 0., 0., 1., 0.]), ' ', array([ 0., 0., 1., 0.])), ('RPE5W27', ': ', array([ 0, 0, 43, 0]), ' ', array([ 0., 0., 1., 0.]), ' ', array([ 0…	1110	0.99729	0.364557	1	1
353	6	107747416	GCTxCTC	G	T	[('RPE5W22', ': ', array([ 0, 0, 0, 62]), ' ', array([ 0., 0., 0., 1.]), ' ', array([ 0., 0., 0., 1.])), ('RPE5W23', ': ', array([ 0, 0, 0, 49]), ' ', array([ 0., 0., 0., 1.]), ' ', array([ 0., 0., 0., 1.])), ('RPE5W24', ': ', array([ 0, 0, 0, 44]), ' ', array([ 0., 0., 0., 1.]), ' ', array([ 0., 0., 0., 1.])), ('RPE5W27', ': ', array([ 0, 0, 0, 38]), ' ', array([ 0., 0., 0., 1.]), ' ', array([ 0…	1110	0.997416	0.292721	0.999999	1
354	6	118486516	AAAxGGT	T	C	[('RPE5W22', ': ', array([ 0, 50, 0, 0]), ' ', array([ 0., 1., 0., 0.]), ' ', array([ 0., 1., 0., 0.])), ('RPE5W23', ': ', array([ 0, 38, 1, 0]), ' ', array([ 0. , 0.97435897, 0.02564103, 0. ]), ' ', array([ 0., 1., 0., 0.])), ('RPE5W24', ': ', array([ 0, 37, 1, 0]), ' ', array([ 0. , 0.97368421, 0.02631579, 0. ]), ' ', array([ 0., 1., 0., 0.])), ('RPE5W27', ': ', array([ 0, 27, 0, 0]), ' ', arra…	1110	0.983837	0.375926	1	1
355	7	49965736	ATCxATC	A	T	[('RPE5W22', ': ', array([56, 1, 0, 0]), ' ', array([ 0.96551724, 0.01724138, 0. , 0. ]), ' ', array([ 1., 0., 0., 0.])), ('RPE5W23', ': ', array([40, 0, 0, 0]), ' ', array([ 1., 0., 0., 0.]), ' ', array([ 1., 0., 0., 0.])), ('RPE5W24', ': ', array([54, 0, 0, 1]), ' ', array([ 0.98181818, 0. , 0. , 0.01818182]), ' ', array([ 1., 0., 0., 0.])), ('RPE5W27', ': ', array([50, 0, 2, 1]), ' ', array([ …	1110	0.98406	0.212653	0.999976	1
356	7	51573977	TTTxTCC	C	A	[('RPE5W22', ': ', array([ 0, 0, 78, 0]), ' ', array([ 0., 0., 1., 0.]), ' ', array([ 0., 0., 1., 0.])), ('RPE5W23', ': ', array([ 0, 0, 55, 0]), ' ', array([ 0., 0., 1., 0.]), ' ', array([ 0., 0., 1., 0.])), ('RPE5W24', ': ', array([ 0, 0, 48, 0]), ' ', array([ 0., 0., 1., 0.]), ' ', array([ 0., 0., 1., 0.])), ('RPE5W27', ': ', array([ 0, 0, 45, 0]), ' ', array([ 0., 0., 1., 0.]), ' ', array([ 0…	1110	0.997076	0.198716	0.997732	1
357	7	62020707	TGTxCAA	A	T	[('RPE5W22', ': ', array([60, 0, 1, 0]), ' ', array([ 0.98360656, 0. , 0.01639344, 0. ]), ' ', array([ 1., 0., 0., 0.])), ('RPE5W23', ': ', array([46, 0, 0, 0]), ' ', array([ 1., 0., 0., 0.]), ' ', array([ 1., 0., 0., 0.])), ('RPE5W24', ': ', array([45, 0, 0, 0]), ' ', array([ 1., 0., 0., 0.]), ' ', array([ 1., 0., 0., 0.])), ('RPE5W27', ': ', array([44, 0, 0, 0]), ' ', array([ 1., 0., 0., 0.]), …	110	0.992701	0.193023	0.999988	1
358	7	84666592	ACCxAGT	C	A	[('RPE5W22', ': ', array([ 0, 0, 70, 0]), ' ', array([ 0., 0., 1., 0.]), ' ', array([ 0., 0., 1., 0.])), ('RPE5W23', ': ', array([ 0, 0, 48, 0]), ' ', array([ 0., 0., 1., 0.]), ' ', array([ 0., 0., 1., 0.])), ('RPE5W24', ': ', array([ 0, 0, 61, 0]), ' ', array([ 0., 0., 1., 0.]), ' ', array([ 0., 0., 1., 0.])), ('RPE5W27', ': ', array([ 0, 0, 58, 0]), ' ', array([ 0., 0., 1., 0.]), ' ', array([ 0…	110	0.996586	0.271786	1	1
359	7	108341144	AGAxATT	G	A	[('RPE5W22', ': ', array([ 0, 1, 0, 68]), ' ', array([ 0. , 0.01449275, 0. , 0.98550725]), ' ', array([ 0., 0., 0., 1.])), ('RPE5W23', ': ', array([ 0, 0, 0, 70]), ' ', array([ 0., 0., 0., 1.]), ' ', array([ 0., 0., 0., 1.])), ('RPE5W24', ': ', array([ 0, 0, 0, 50]), ' ', array([ 0., 0., 0., 1.]), ' ', array([ 0., 0., 0., 1.])), ('RPE5W27', ': ', array([ 0, 0, 0, 51]), ' ', array([ 0., 0., 0., 1.…	1110	0.995864	0.176733	0.999873	1
360	7	108341145	GAGxTTG	A	T	[('RPE5W22', ': ', array([70, 0, 0, 1]), ' ', array([ 0.98591549, 0. , 0. , 0.01408451]), ' ', array([ 1., 0., 0., 0.])), ('RPE5W23', ': ', array([67, 0, 1, 2]), ' ', array([ 0.95714286, 0. , 0.01428571, 0.02857143]), ' ', array([ 1., 0., 0., 0.])), ('RPE5W24', ': ', array([47, 0, 1, 1]), ' ', array([ 0.95918367, 0. , 0.02040816, 0.02040816]), ' ', array([ 1., 0., 0., 0.])), ('RPE5W27', ': ', arr…	1110	0.982348	0.164513	0.99941	1
361	7	155322412	CTTxACT	A	T	[('RPE5W22', ': ', array([71, 0, 1, 0]), ' ', array([ 0.98611111, 0. , 0.01388889, 0. ]), ' ', array([ 1., 0., 0., 0.])), ('RPE5W23', ': ', array([48, 0, 0, 0]), ' ', array([ 1., 0., 0., 0.]), ' ', array([ 1., 0., 0., 0.])), ('RPE5W24', ': ', array([55, 0, 1, 0]), ' ', array([ 0.98214286, 0. , 0.01785714, 0. ]), ' ', array([ 1., 0., 0., 0.])), ('RPE5W27', ': ', array([39, 0, 0, 0]), ' ', array([ …	1110	0.982971	0.272237	0.999954	1
362	8	3855136	AAAxTAA	C	T	[('RPE5W22', ': ', array([ 0, 0, 62, 0]), ' ', array([ 0., 0., 1., 0.]), ' ', array([ 0., 0., 1., 0.])), ('RPE5W23', ': ', array([ 0, 0, 34, 0]), ' ', array([ 0., 0., 1., 0.]), ' ', array([ 0., 0., 1., 0.])), ('RPE5W24', ': ', array([ 0, 0, 39, 0]), ' ', array([ 0., 0., 1., 0.]), ' ', array([ 0., 0., 1., 0.])), ('RPE5W27', ': ', array([ 0, 0, 37, 0]), ' ', array([ 0., 0., 1., 0.]), ' ', array([ 0…	110	0.993939	0.35	0.999996	1
363	8	35192480	CTTxTTC	C	G	[('RPE5W22', ': ', array([ 0, 0, 47, 0]), ' ', array([ 0., 0., 1., 0.]), ' ', array([ 0., 0., 1., 0.])), ('RPE5W23', ': ', array([ 0, 0, 36, 0]), ' ', array([ 0., 0., 1., 0.]), ' ', array([ 0., 0., 1., 0.])), ('RPE5W24', ': ', array([ 0, 0, 34, 1]), ' ', array([ 0. , 0. , 0.97142857, 0.02857143]), ' ', array([ 0., 0., 1., 0.])), ('RPE5W27', ': ', array([ 0, 0, 35, 0]), ' ', array([ 0., 0., 1., 0.…	110	0.994113	0.354167	1	1
364	8	71509717	GGCxAAC	C	A	[('RPE5W22', ': ', array([ 0, 0, 44, 0]), ' ', array([ 0., 0., 1., 0.]), ' ', array([ 0., 0., 1., 0.])), ('RPE5W23', ': ', array([ 1, 0, 37, 0]), ' ', array([ 0.02631579, 0. , 0.97368421, 0. ]), ' ', array([ 0., 0., 1., 0.])), ('RPE5W24', ': ', array([ 0, 0, 36, 0]), ' ', array([ 0., 0., 1., 0.]), ' ', array([ 0., 0., 1., 0.])), ('RPE5W27', ': ', array([ 0, 0, 31, 0]), ' ', array([ 0., 0., 1., 0.…	1110	1	0.377476	1	1
365	8	85956392	CTTxCTA	T	G	[('RPE5W22', ': ', array([ 0, 40, 1, 0]), ' ', array([ 0. , 0.97560976, 0.02439024, 0. ]), ' ', array([ 0., 1., 0., 0.])), ('RPE5W23', ': ', array([ 0, 35, 0, 0]), ' ', array([ 0., 1., 0., 0.]), ' ', array([ 0., 1., 0., 0.])), ('RPE5W24', ': ', array([ 0, 37, 0, 0]), ' ', array([ 0., 1., 0., 0.]), ' ', array([ 0., 1., 0., 0.])), ('RPE5W27', ': ', array([ 0, 42, 0, 1]), ' ', array([ 0. , 0.9767441…	110	0.992604	0.305161	0.999999	1
366	8	108474049	GGCxATC	G	T	[('RPE5W22', ': ', array([ 0, 1, 0, 46]), ' ', array([ 0. , 0.0212766, 0. , 0.9787234]), ' ', array([ 0., 0., 0., 1.])), ('RPE5W23', ': ', array([ 0, 0, 0, 39]), ' ', array([ 0., 0., 0., 1.]), ' ', array([ 0., 0., 0., 1.])), ('RPE5W24', ': ', array([ 0, 1, 0, 42]), ' ', array([ 0. , 0.02325581, 0. , 0.97674419]), ' ', array([ 0., 0., 0., 1.])), ('RPE5W27', ': ', array([ 0, 0, 0, 42]), ' ', array(…	1110	0.984822	0.302886	0.997765	1
367	8	115516687	GAGxGGC	G	A	[('RPE5W22', ': ', array([ 0, 0, 0, 47]), ' ', array([ 0., 0., 0., 1.]), ' ', array([ 0., 0., 0., 1.])), ('RPE5W23', ': ', array([ 0, 0, 0, 32]), ' ', array([ 0., 0., 0., 1.]), ' ', array([ 0., 0., 0., 1.])), ('RPE5W24', ': ', array([ 0, 0, 1, 40]), ' ', array([ 0. , 0. , 0.02439024, 0.97560976]), ' ', array([ 0., 0., 0., 1.])), ('RPE5W27', ': ', array([ 0, 0, 0, 29]), ' ', array([ 0., 0., 0., 1.…	110	0.99251	0.314655	0.999999	1
368	8	135493295	TATxAAT	C	T	[('RPE5W22', ': ', array([ 0, 0, 68, 0]), ' ', array([ 0., 0., 1., 0.]), ' ', array([ 0., 0., 1., 0.])), ('RPE5W23', ': ', array([ 0, 0, 35, 0]), ' ', array([ 0., 0., 1., 0.]), ' ', array([ 0., 0., 1., 0.])), ('RPE5W24', ': ', array([ 0, 0, 40, 0]), ' ', array([ 0., 0., 1., 0.]), ' ', array([ 0., 0., 1., 0.])), ('RPE5W27', ': ', array([ 0, 0, 33, 1]), ' ', array([ 0. , 0. , 0.97058824, 0.02941176…	1110	0.990289	0.37571	1	1
369	9	1079836	AGGxCTG	T	A	[('RPE5W22', ': ', array([ 0, 62, 0, 0]), ' ', array([ 0., 1., 0., 0.]), ' ', array([ 0., 1., 0., 0.])), ('RPE5W23', ': ', array([ 0, 29, 0, 1]), ' ', array([ 0. , 0.96666667, 0. , 0.03333333]), ' ', array([ 0., 1., 0., 0.])), ('RPE5W24', ': ', array([ 0, 34, 0, 0]), ' ', array([ 0., 1., 0., 0.]), ' ', array([ 0., 1., 0., 0.])), ('RPE5W27', ': ', array([ 0, 51, 0, 0]), ' ', array([ 0., 1., 0., 0.…	1110	0.997636	0.327671	1	1
370	9	25014581	AAGxAGA	G	A	[('RPE5W22', ': ', array([ 2, 0, 0, 55]), ' ', array([ 0.03508772, 0. , 0. , 0.96491228]), ' ', array([ 0., 0., 0., 1.])), ('RPE5W23', ': ', array([ 0, 0, 0, 39]), ' ', array([ 0., 0., 0., 1.]), ' ', array([ 0., 0., 0., 1.])), ('RPE5W24', ': ', array([ 0, 0, 1, 43]), ' ', array([ 0. , 0. , 0.02272727, 0.97727273]), ' ', array([ 0., 0., 0., 1.])), ('RPE5W27', ': ', array([ 0, 0, 0, 45]), ' ', arra…	110	0.985742	0.276423	0.999974	1
371	9	29832146	TGTxGTG	T	A	[('RPE5W22', ': ', array([ 1, 64, 0, 0]), ' ', array([ 0.01538462, 0.98461538, 0. , 0. ]), ' ', array([ 0., 1., 0., 0.])), ('RPE5W23', ': ', array([ 0, 33, 0, 0]), ' ', array([ 0., 1., 0., 0.]), ' ', array([ 0., 1., 0., 0.])), ('RPE5W24', ': ', array([ 0, 39, 0, 1]), ' ', array([ 0. , 0.975, 0. , 0.025]), ' ', array([ 0., 1., 0., 0.])), ('RPE5W27', ': ', array([ 0, 24, 0, 0]), ' ', array([ 0., 1.…	1110	0.995513	0.340683	0.999988	1
372	9	47197977	ATGxGGT	G	C	[('RPE5W22', ': ', array([ 0, 0, 0, 39]), ' ', array([ 0., 0., 0., 1.]), ' ', array([ 0., 0., 0., 1.])), ('RPE5W23', ': ', array([ 1, 1, 0, 41]), ' ', array([ 0.02325581, 0.02325581, 0. , 0.95348837]), ' ', array([ 0., 0., 0., 1.])), ('RPE5W24', ': ', array([ 0, 0, 0, 35]), ' ', array([ 0., 0., 0., 1.]), ' ', array([ 0., 0., 0., 1.])), ('RPE5W27', ': ', array([ 0, 0, 0, 23]), ' ', array([ 0., 0.,…	1110	1	0.26309	0.99957	1
373	9	134428928	CATxATT	C	T	[('RPE5W22', ': ', array([ 0, 0, 46, 0]), ' ', array([ 0., 0., 1., 0.]), ' ', array([ 0., 0., 1., 0.])), ('RPE5W23', ': ', array([ 0, 0, 35, 0]), ' ', array([ 0., 0., 1., 0.]), ' ', array([ 0., 0., 1., 0.])), ('RPE5W24', ': ', array([ 0, 0, 34, 0]), ' ', array([ 0., 0., 1., 0.]), ' ', array([ 0., 0., 1., 0.])), ('RPE5W27', ': ', array([ 0, 0, 42, 0]), ' ', array([ 0., 0., 1., 0.]), ' ', array([ 0…	1110	1	0.274099	1	1
374	10	46977983	CAAxATT	C	A	[('RPE5W22', ': ', array([ 0, 0, 54, 0]), ' ', array([ 0., 0., 1., 0.]), ' ', array([ 0., 0., 1., 0.])), ('RPE5W23', ': ', array([ 0, 0, 24, 0]), ' ', array([ 0., 0., 1., 0.]), ' ', array([ 0., 0., 1., 0.])), ('RPE5W24', ': ', array([ 0, 0, 35, 0]), ' ', array([ 0., 0., 1., 0.]), ' ', array([ 0., 0., 1., 0.])), ('RPE5W27', ': ', array([ 0, 0, 35, 0]), ' ', array([ 0., 0., 1., 0.]), ' ', array([ 0…	1110	0.991746	0.276941	0.999888	1
375	10	54552722	AATxGGT	A	T	[('RPE5W22', ': ', array([26, 0, 0, 0]), ' ', array([ 1., 0., 0., 0.]), ' ', array([ 1., 0., 0., 0.])), ('RPE5W23', ': ', array([23, 0, 0, 0]), ' ', array([ 1., 0., 0., 0.]), ' ', array([ 1., 0., 0., 0.])), ('RPE5W24', ': ', array([23, 0, 0, 0]), ' ', array([ 1., 0., 0., 0.]), ' ', array([ 1., 0., 0., 0.])), ('RPE5W27', ': ', array([22, 0, 0, 0]), ' ', array([ 1., 0., 0., 0.]), ' ', array([ 1., 0…	1110	0.994152	0.496154	1	1
376	10	112798970	CAAxTGC	C	A	[('RPE5W22', ': ', array([ 0, 0, 72, 0]), ' ', array([ 0., 0., 1., 0.]), ' ', array([ 0., 0., 1., 0.])), ('RPE5W23', ': ', array([ 0, 0, 46, 0]), ' ', array([ 0., 0., 1., 0.]), ' ', array([ 0., 0., 1., 0.])), ('RPE5W24', ': ', array([ 0, 0, 46, 0]), ' ', array([ 0., 0., 1., 0.]), ' ', array([ 0., 0., 1., 0.])), ('RPE5W27', ': ', array([ 0, 0, 39, 0]), ' ', array([ 0., 0., 1., 0.]), ' ', array([ 0…	1110	1	0.27756	1	1
377	10	119669366	TTAxAAA	G	C	[('RPE5W22', ': ', array([ 0, 0, 0, 97]), ' ', array([ 0., 0., 0., 1.]), ' ', array([ 0., 0., 0., 1.])), ('RPE5W23', ': ', array([ 0, 1, 0, 61]), ' ', array([ 0. , 0.01612903, 0. , 0.98387097]), ' ', array([ 0., 0., 0., 1.])), ('RPE5W24', ': ', array([ 0, 1, 0, 43]), ' ', array([ 0. , 0.02272727, 0. , 0.97727273]), ' ', array([ 0., 0., 0., 1.])), ('RPE5W27', ': ', array([ 0, 0, 0, 45]), ' ', arra…	110	0.986963	0.331579	1	1
378	10	124670554	TCTxCAG	G	T	[('RPE5W22', ': ', array([ 0, 0, 0, 63]), ' ', array([ 0., 0., 0., 1.]), ' ', array([ 0., 0., 0., 1.])), ('RPE5W23', ': ', array([ 0, 0, 0, 58]), ' ', array([ 0., 0., 0., 1.]), ' ', array([ 0., 0., 0., 1.])), ('RPE5W24', ': ', array([ 0, 0, 0, 52]), ' ', array([ 0., 0., 0., 1.]), ' ', array([ 0., 0., 0., 1.])), ('RPE5W27', ': ', array([ 0, 0, 0, 46]), ' ', array([ 0., 0., 0., 1.]), ' ', array([ 0…	110	0.99595	0.212452	0.999901	1
379	11	4950421	ATAxTTT	C	T	[('RPE5W22', ': ', array([ 0, 0, 82, 0]), ' ', array([ 0., 0., 1., 0.]), ' ', array([ 0., 0., 1., 0.])), ('RPE5W23', ': ', array([ 0, 0, 42, 0]), ' ', array([ 0., 0., 1., 0.]), ' ', array([ 0., 0., 1., 0.])), ('RPE5W24', ': ', array([ 0, 0, 51, 0]), ' ', array([ 0., 0., 1., 0.]), ' ', array([ 0., 0., 1., 0.])), ('RPE5W27', ': ', array([ 0, 0, 47, 0]), ' ', array([ 0., 0., 1., 0.]), ' ', array([ 0…	1110	0.993401	0.242063	0.999994	1
380	11	25979776	GCTxGAG	G	T	[('RPE5W22', ': ', array([ 0, 1, 0, 68]), ' ', array([ 0. , 0.01449275, 0. , 0.98550725]), ' ', array([ 0., 0., 0., 1.])), ('RPE5W23', ': ', array([ 0, 0, 0, 48]), ' ', array([ 0., 0., 0., 1.]), ' ', array([ 0., 0., 0., 1.])), ('RPE5W24', ': ', array([ 0, 0, 0, 50]), ' ', array([ 0., 0., 0., 1.]), ' ', array([ 0., 0., 0., 1.])), ('RPE5W27', ': ', array([ 0, 1, 1, 57]), ' ', array([ 0. , 0.0169491…	110	0.986676	0.280112	0.999999	1
381	11	28540830	GAGxGGT	C	A	[('RPE5W22', ': ', array([ 0, 0, 84, 1]), ' ', array([ 0. , 0. , 0.98823529, 0.01176471]), ' ', array([ 0., 0., 1., 0.])), ('RPE5W23', ': ', array([ 0, 0, 65, 0]), ' ', array([ 0., 0., 1., 0.]), ' ', array([ 0., 0., 1., 0.])), ('RPE5W24', ': ', array([ 0, 0, 48, 0]), ' ', array([ 0., 0., 1., 0.]), ' ', array([ 0., 0., 1., 0.])), ('RPE5W27', ': ', array([ 0, 1, 53, 1]), ' ', array([ 0. , 0.0181818…	1110	0.98991	0.21563	0.999965	1
382	11	86865003	ATTxTTT	T	C	[('RPE5W22', ': ', array([ 0, 66, 0, 0]), ' ', array([ 0., 1., 0., 0.]), ' ', array([ 0., 1., 0., 0.])), ('RPE5W23', ': ', array([ 0, 45, 0, 1]), ' ', array([ 0. , 0.97826087, 0. , 0.02173913]), ' ', array([ 0., 1., 0., 0.])), ('RPE5W24', ': ', array([ 0, 60, 0, 0]), ' ', array([ 0., 1., 0., 0.]), ' ', array([ 0., 1., 0., 0.])), ('RPE5W27', ': ', array([ 0, 50, 0, 0]), ' ', array([ 0., 1., 0., 0.…	1110	0.991668	0.292247	1	1
383	11	90777767	ATTxATC	G	T	[('RPE5W22', ': ', array([ 0, 0, 0, 53]), ' ', array([ 0., 0., 0., 1.]), ' ', array([ 0., 0., 0., 1.])), ('RPE5W23', ': ', array([ 0, 0, 0, 43]), ' ', array([ 0., 0., 0., 1.]), ' ', array([ 0., 0., 0., 1.])), ('RPE5W24', ': ', array([ 0, 0, 0, 51]), ' ', array([ 0., 0., 0., 1.]), ' ', array([ 0., 0., 0., 1.])), ('RPE5W27', ': ', array([ 0, 0, 0, 59]), ' ', array([ 0., 0., 0., 1.]), ' ', array([ 0…	1110	0.991895	0.248816	0.999999	1
384	12	68487669	GTCxCTA	A	G	[('RPE5W22', ': ', array([67, 0, 0, 0]), ' ', array([ 1., 0., 0., 0.]), ' ', array([ 1., 0., 0., 0.])), ('RPE5W23', ': ', array([46, 0, 0, 1]), ' ', array([ 0.9787234, 0. , 0. , 0.0212766]), ' ', array([ 1., 0., 0., 0.])), ('RPE5W24', ': ', array([43, 0, 0, 0]), ' ', array([ 1., 0., 0., 0.]), ' ', array([ 1., 0., 0., 0.])), ('RPE5W27', ': ', array([41, 0, 0, 0]), ' ', array([ 1., 0., 0., 0.]), ' …	1110	0.997354	0.212169	0.999994	1
385	12	75818406	TATxTTT	T	G	[('RPE5W22', ': ', array([ 0, 54, 0, 1]), ' ', array([ 0. , 0.98181818, 0. , 0.01818182]), ' ', array([ 0., 1., 0., 0.])), ('RPE5W23', ': ', array([ 0, 44, 0, 0]), ' ', array([ 0., 1., 0., 0.]), ' ', array([ 0., 1., 0., 0.])), ('RPE5W24', ': ', array([ 0, 50, 0, 0]), ' ', array([ 0., 1., 0., 0.]), ' ', array([ 0., 1., 0., 0.])), ('RPE5W27', ': ', array([ 0, 44, 0, 0]), ' ', array([ 0., 1., 0., 0.…	1110	0.995616	0.182293	0.999819	1
386	12	83214174	ACAxAGT	C	T	[('RPE5W22', ': ', array([ 0, 0, 78, 0]), ' ', array([ 0., 0., 1., 0.]), ' ', array([ 0., 0., 1., 0.])), ('RPE5W23', ': ', array([ 0, 0, 47, 0]), ' ', array([ 0., 0., 1., 0.]), ' ', array([ 0., 0., 1., 0.])), ('RPE5W24', ': ', array([ 0, 0, 45, 0]), ' ', array([ 0., 0., 1., 0.]), ' ', array([ 0., 0., 1., 0.])), ('RPE5W27', ': ', array([ 0, 0, 51, 0]), ' ', array([ 0., 0., 1., 0.]), ' ', array([ 0…	110	0.992569	0.316308	1	1
387	12	128193492	AGGxAGC	C	T	[('RPE5W22', ': ', array([ 0, 0, 75, 0]), ' ', array([ 0., 0., 1., 0.]), ' ', array([ 0., 0., 1., 0.])), ('RPE5W23', ': ', array([ 0, 0, 52, 0]), ' ', array([ 0., 0., 1., 0.]), ' ', array([ 0., 0., 1., 0.])), ('RPE5W24', ': ', array([ 0, 0, 55, 1]), ' ', array([ 0. , 0. , 0.98214286, 0.01785714]), ' ', array([ 0., 0., 1., 0.])), ('RPE5W27', ': ', array([ 0, 0, 61, 0]), ' ', array([ 0., 0., 1., 0.…	1110	0.992363	0.232816	0.999997	1
388	12	128488978	CGGxGCC	C	T	[('RPE5W22', ': ', array([ 0, 0, 73, 0]), ' ', array([ 0., 0., 1., 0.]), ' ', array([ 0., 0., 1., 0.])), ('RPE5W23', ': ', array([ 0, 0, 51, 0]), ' ', array([ 0., 0., 1., 0.]), ' ', array([ 0., 0., 1., 0.])), ('RPE5W24', ': ', array([ 0, 0, 67, 0]), ' ', array([ 0., 0., 1., 0.]), ' ', array([ 0., 0., 1., 0.])), ('RPE5W27', ': ', array([ 0, 0, 49, 0]), ' ', array([ 0., 0., 1., 0.]), ' ', array([ 0…	1110	1	0.224206	0.999912	1
389	13	67620813	GTAxATC	T	C	[('RPE5W22', ': ', array([ 0, 52, 0, 0]), ' ', array([ 0., 1., 0., 0.]), ' ', array([ 0., 1., 0., 0.])), ('RPE5W23', ': ', array([ 1, 32, 0, 0]), ' ', array([ 0.03030303, 0.96969697, 0. , 0. ]), ' ', array([ 0., 1., 0., 0.])), ('RPE5W24', ': ', array([ 1, 37, 0, 0]), ' ', array([ 0.02631579, 0.97368421, 0. , 0. ]), ' ', array([ 0., 1., 0., 0.])), ('RPE5W27', ': ', array([ 0, 35, 0, 0]), ' ', arra…	110	0.994511	0.23073	0.999332	1
390	14	34596322	TTTxAGG	G	A	[('RPE5W22', ': ', array([ 0, 1, 0, 44]), ' ', array([ 0. , 0.02222222, 0. , 0.97777778]), ' ', array([ 0., 0., 0., 1.])), ('RPE5W23', ': ', array([ 0, 0, 0, 43]), ' ', array([ 0., 0., 0., 1.]), ' ', array([ 0., 0., 0., 1.])), ('RPE5W24', ': ', array([ 0, 0, 0, 43]), ' ', array([ 0., 0., 0., 1.]), ' ', array([ 0., 0., 0., 1.])), ('RPE5W27', ': ', array([ 0, 0, 0, 29]), ' ', array([ 0., 0., 0., 1.…	1110	0.994885	0.412287	1	1
391	14	98136183	GTAxCTG	G	T	[('RPE5W22', ': ', array([ 0, 0, 0, 44]), ' ', array([ 0., 0., 0., 1.]), ' ', array([ 0., 0., 0., 1.])), ('RPE5W23', ': ', array([ 2, 0, 0, 25]), ' ', array([ 0.07407407, 0. , 0. , 0.92592593]), ' ', array([ 0., 0., 0., 1.])), ('RPE5W24', ': ', array([ 0, 0, 0, 22]), ' ', array([ 0., 0., 0., 1.]), ' ', array([ 0., 0., 0., 1.])), ('RPE5W27', ': ', array([ 0, 0, 0, 34]), ' ', array([ 0., 0., 0., 1.…	1110	0.99137	0.350644	0.999994	1
392	14	103511622	ATTxTGC	C	A	[('RPE5W22', ': ', array([ 0, 0, 50, 0]), ' ', array([ 0., 0., 1., 0.]), ' ', array([ 0., 0., 1., 0.])), ('RPE5W23', ': ', array([ 0, 0, 42, 0]), ' ', array([ 0., 0., 1., 0.]), ' ', array([ 0., 0., 1., 0.])), ('RPE5W24', ': ', array([ 0, 1, 59, 0]), ' ', array([ 0. , 0.01666667, 0.98333333, 0. ]), ' ', array([ 0., 0., 1., 0.])), ('RPE5W27', ': ', array([ 0, 0, 36, 0]), ' ', array([ 0., 0., 1., 0.…	110	0.998333	0.315611	0.999995	1
393	15	38694741	CAGxCTG	C	T	[('RPE5W22', ': ', array([ 1, 0, 47, 0]), ' ', array([ 0.02083333, 0. , 0.97916667, 0. ]), ' ', array([ 0., 0., 1., 0.])), ('RPE5W23', ': ', array([ 0, 0, 33, 0]), ' ', array([ 0., 0., 1., 0.]), ' ', array([ 0., 0., 1., 0.])), ('RPE5W24', ': ', array([ 0, 0, 26, 0]), ' ', array([ 0., 0., 1., 0.]), ' ', array([ 0., 0., 1., 0.])), ('RPE5W27', ': ', array([ 1, 0, 35, 0]), ' ', array([ 0.02777778, 0.…	1110	0.989308	0.241785	0.999889	1
394	15	81033221	CCTxGAG	G	A	[('RPE5W22', ': ', array([ 0, 0, 0, 37]), ' ', array([ 0., 0., 0., 1.]), ' ', array([ 0., 0., 0., 1.])), ('RPE5W23', ': ', array([ 0, 0, 0, 42]), ' ', array([ 0., 0., 0., 1.]), ' ', array([ 0., 0., 0., 1.])), ('RPE5W24', ': ', array([ 0, 2, 0, 45]), ' ', array([ 0. , 0.04255319, 0. , 0.95744681]), ' ', array([ 0., 0., 0., 1.])), ('RPE5W27', ': ', array([ 0, 0, 0, 35]), ' ', array([ 0., 0., 0., 1.…	1110	0.983165	0.287619	0.999024	1
395	15	87962923	AGAxAAG	G	T	[('RPE5W22', ': ', array([ 0, 1, 1, 46]), ' ', array([ 0. , 0.02083333, 0.02083333, 0.95833333]), ' ', array([ 0., 0., 0., 1.])), ('RPE5W23', ': ', array([ 0, 0, 0, 44]), ' ', array([ 0., 0., 0., 1.]), ' ', array([ 0., 0., 0., 1.])), ('RPE5W24', ': ', array([ 0, 1, 0, 34]), ' ', array([ 0. , 0.02857143, 0. , 0.97142857]), ' ', array([ 0., 0., 0., 1.])), ('RPE5W27', ': ', array([ 0, 0, 0, 41]), ' …	110	0.989528	0.254158	0.998989	1
396	16	77105309	CTTxAAA	G	A	[('RPE5W22', ': ', array([ 0, 0, 0, 72]), ' ', array([ 0., 0., 0., 1.]), ' ', array([ 0., 0., 0., 1.])), ('RPE5W23', ': ', array([ 0, 0, 0, 53]), ' ', array([ 0., 0., 0., 1.]), ' ', array([ 0., 0., 0., 1.])), ('RPE5W24', ': ', array([ 1, 0, 0, 55]), ' ', array([ 0.01785714, 0. , 0. , 0.98214286]), ' ', array([ 0., 0., 0., 1.])), ('RPE5W27', ': ', array([ 0, 0, 0, 49]), ' ', array([ 0., 0., 0., 1.…	1110	0.989957	0.20276	0.991695	1
397	17	55166837	AAAxTTC	T	A	[('RPE5W22', ': ', array([ 0, 38, 0, 3]), ' ', array([ 0. , 0.92682927, 0. , 0.07317073]), ' ', array([ 0., 1., 0., 0.])), ('RPE5W23', ': ', array([ 0, 33, 0, 0]), ' ', array([ 0., 1., 0., 0.]), ' ', array([ 0., 1., 0., 0.])), ('RPE5W24', ': ', array([ 0, 31, 0, 0]), ' ', array([ 0., 1., 0., 0.]), ' ', array([ 0., 1., 0., 0.])), ('RPE5W27', ': ', array([ 0, 41, 0, 0]), ' ', array([ 0., 1., 0., 0.…	110	0.982334	0.339744	0.999997	1
398	19	42903417	GTGxCGC	G	C	[('RPE5W22', ': ', array([ 0, 0, 0, 53]), ' ', array([ 0., 0., 0., 1.]), ' ', array([ 0., 0., 0., 1.])), ('RPE5W23', ': ', array([ 0, 1, 0, 39]), ' ', array([ 0. , 0.025, 0. , 0.975]), ' ', array([ 0., 0., 0., 1.])), ('RPE5W24', ': ', array([ 0, 0, 1, 52]), ' ', array([ 0. , 0. , 0.01886792, 0.98113208]), ' ', array([ 0., 0., 0., 1.])), ('RPE5W27', ': ', array([ 0, 0, 1, 42]), ' ', array([ 0. , 0…	110	0.99301	0.294326	0.999975	1
399	20	16393180	CCTxAGA	C	T	[('RPE5W22', ': ', array([ 0, 0, 72, 0]), ' ', array([ 0., 0., 1., 0.]), ' ', array([ 0., 0., 1., 0.])), ('RPE5W23', ': ', array([ 0, 0, 48, 0]), ' ', array([ 0., 0., 1., 0.]), ' ', array([ 0., 0., 1., 0.])), ('RPE5W24', ': ', array([ 0, 0, 40, 0]), ' ', array([ 0., 0., 1., 0.]), ' ', array([ 0., 0., 1., 0.])), ('RPE5W27', ': ', array([ 0, 0, 64, 0]), ' ', array([ 0., 0., 1., 0.]), ' ', array([ 0…	110	0.9975	0.284722	1	1
400	20	41722247	CCTxTGA	C	A	[('RPE5W22', ': ', array([ 0, 0, 67, 0]), ' ', array([ 0., 0., 1., 0.]), ' ', array([ 0., 0., 1., 0.])), ('RPE5W23', ': ', array([ 0, 0, 48, 0]), ' ', array([ 0., 0., 1., 0.]), ' ', array([ 0., 0., 1., 0.])), ('RPE5W24', ': ', array([ 0, 0, 48, 0]), ' ', array([ 0., 0., 1., 0.]), ' ', array([ 0., 0., 1., 0.])), ('RPE5W27', ': ', array([ 0, 0, 53, 0]), ' ', array([ 0., 0., 1., 0.]), ' ', array([ 0…	110	1	0.27592	1	1
401	20	54298345	AAAxACC	G	T	[('RPE5W22', ': ', array([ 0, 0, 1, 66]), ' ', array([ 0. , 0. , 0.01492537, 0.98507463]), ' ', array([ 0., 0., 0., 1.])), ('RPE5W23', ': ', array([ 0, 0, 0, 60]), ' ', array([ 0., 0., 0., 1.]), ' ', array([ 0., 0., 0., 1.])), ('RPE5W24', ': ', array([ 0, 0, 0, 55]), ' ', array([ 0., 0., 0., 1.]), ' ', array([ 0., 0., 0., 1.])), ('RPE5W27', ': ', array([ 0, 0, 0, 47]), ' ', array([ 0., 0., 0., 1.…	1110	0.994143	0.262354	1	1
402	20	58549372	ACAxAGT	G	T	[('RPE5W22', ': ', array([ 0, 0, 0, 79]), ' ', array([ 0., 0., 0., 1.]), ' ', array([ 0., 0., 0., 1.])), ('RPE5W23', ': ', array([ 0, 0, 0, 54]), ' ', array([ 0., 0., 0., 1.]), ' ', array([ 0., 0., 0., 1.])), ('RPE5W24', ': ', array([ 0, 1, 1, 56]), ' ', array([ 0. , 0.01724138, 0.01724138, 0.96551724]), ' ', array([ 0., 0., 0., 1.])), ('RPE5W27', ': ', array([ 0, 0, 0, 50]), ' ', array([ 0., 0.,…	1110	0.992336	0.25141	1	1
403	21	18031794	TAAxGAT	T	C	[('RPE5W22', ': ', array([ 1, 51, 0, 0]), ' ', array([ 0.01923077, 0.98076923, 0. , 0. ]), ' ', array([ 0., 1., 0., 0.])), ('RPE5W23', ': ', array([ 0, 38, 0, 1]), ' ', array([ 0. , 0.97435897, 0. , 0.02564103]), ' ', array([ 0., 1., 0., 0.])), ('RPE5W24', ': ', array([ 0, 44, 0, 0]), ' ', array([ 0., 1., 0., 0.]), ' ', array([ 0., 1., 0., 0.])), ('RPE5W27', ': ', array([ 0, 35, 0, 0]), ' ', arra…	1110	0.982214	0.360671	0.999935	1
404	21	37285960	AAAxGAA	G	T	[('RPE5W22', ': ', array([ 0, 0, 0, 49]), ' ', array([ 0., 0., 0., 1.]), ' ', array([ 0., 0., 0., 1.])), ('RPE5W23', ': ', array([ 0, 0, 1, 42]), ' ', array([ 0. , 0. , 0.02325581, 0.97674419]), ' ', array([ 0., 0., 0., 1.])), ('RPE5W24', ': ', array([ 0, 0, 0, 36]), ' ', array([ 0., 0., 0., 1.]), ' ', array([ 0., 0., 0., 1.])), ('RPE5W27', ': ', array([ 0, 0, 0, 23]), ' ', array([ 0., 0., 0., 1.…	110	0.986733	0.388649	1	1
405	22	49252838	CAGxTCC	C	A	[('RPE5W22', ': ', array([ 0, 0, 40, 0]), ' ', array([ 0., 0., 1., 0.]), ' ', array([ 0., 0., 1., 0.])), ('RPE5W23', ': ', array([ 0, 0, 21, 0]), ' ', array([ 0., 0., 1., 0.]), ' ', array([ 0., 0., 1., 0.])), ('RPE5W24', ': ', array([ 0, 0, 21, 0]), ' ', array([ 0., 0., 1., 0.]), ' ', array([ 0., 0., 1., 0.])), ('RPE5W27', ': ', array([ 0, 0, 13, 0]), ' ', array([ 0., 0., 1., 0.]), ' ', array([ 0…	1110	1	0.465453	0.99998	1
406	X	21680059	GCAxCCC	G	T	[('RPE5W22', ': ', array([ 0, 0, 0, 56]), ' ', array([ 0., 0., 0., 1.]), ' ', array([ 0., 0., 0., 1.])), ('RPE5W23', ': ', array([ 0, 0, 0, 33]), ' ', array([ 0., 0., 0., 1.]), ' ', array([ 0., 0., 0., 1.])), ('RPE5W24', ': ', array([ 0, 0, 1, 36]), ' ', array([ 0. , 0. , 0.02702703, 0.97297297]), ' ', array([ 0., 0., 0., 1.])), ('RPE5W27', ': ', array([ 0, 0, 1, 40]), ' ', array([ 0. , 0. , 0.02…	110	0.992533	0.308895	0.999999	1
407	X	27402969	AATxATT	T	A	[('RPE5W22', ': ', array([ 0, 61, 0, 0]), ' ', array([ 0., 1., 0., 0.]), ' ', array([ 0., 1., 0., 0.])), ('RPE5W23', ': ', array([ 0, 43, 0, 0]), ' ', array([ 0., 1., 0., 0.]), ' ', array([ 0., 1., 0., 0.])), ('RPE5W24', ': ', array([ 0, 38, 0, 0]), ' ', array([ 0., 1., 0., 0.]), ' ', array([ 0., 1., 0., 0.])), ('RPE5W27', ': ', array([ 0, 35, 0, 0]), ' ', array([ 0., 1., 0., 0.]), ' ', array([ 0…	110	0.993704	0.306188	0.999988	1
408	X	45743791	TCTxATT	G	A	[('RPE5W22', ': ', array([ 0, 0, 0, 64]), ' ', array([ 0., 0., 0., 1.]), ' ', array([ 0., 0., 0., 1.])), ('RPE5W23', ': ', array([ 0, 0, 0, 35]), ' ', array([ 0., 0., 0., 1.]), ' ', array([ 0., 0., 0., 1.])), ('RPE5W24', ': ', array([ 0, 0, 0, 36]), ' ', array([ 0., 0., 0., 1.]), ' ', array([ 0., 0., 0., 1.])), ('RPE5W27', ': ', array([ 0, 1, 0, 36]), ' ', array([ 0. , 0.02702703, 0. , 0.97297297…	1110	0.993729	0.301219	0.999655	1
409	X	50367346	CTAxACT	C	A	[('RPE5W22', ': ', array([ 0, 0, 47, 0]), ' ', array([ 0., 0., 1., 0.]), ' ', array([ 0., 0., 1., 0.])), ('RPE5W23', ': ', array([ 0, 0, 50, 0]), ' ', array([ 0., 0., 1., 0.]), ' ', array([ 0., 0., 1., 0.])), ('RPE5W24', ': ', array([ 0, 0, 43, 1]), ' ', array([ 0. , 0. , 0.97727273, 0.02272727]), ' ', array([ 0., 0., 1., 0.])), ('RPE5W27', ': ', array([ 0, 0, 22, 0]), ' ', array([ 0., 0., 1., 0.…	1110	0.990583	0.421496	1	1
410	X	65489845	AGTxGCC	G	T	[('RPE5W22', ': ', array([ 0, 0, 0, 52]), ' ', array([ 0., 0., 0., 1.]), ' ', array([ 0., 0., 0., 1.])), ('RPE5W23', ': ', array([ 0, 0, 0, 40]), ' ', array([ 0., 0., 0., 1.]), ' ', array([ 0., 0., 0., 1.])), ('RPE5W24', ': ', array([ 0, 0, 0, 41]), ' ', array([ 0., 0., 0., 1.]), ' ', array([ 0., 0., 0., 1.])), ('RPE5W27', ': ', array([ 0, 0, 0, 45]), ' ', array([ 0., 0., 0., 1.]), ' ', array([ 0…	110	0.994172	0.312366	1	1
411	X	68881662	AATxACT	C	A	[('RPE5W22', ': ', array([ 1, 0, 65, 0]), ' ', array([ 0.01515152, 0. , 0.98484848, 0. ]), ' ', array([ 0., 0., 1., 0.])), ('RPE5W23', ': ', array([ 0, 1, 38, 0]), ' ', array([ 0. , 0.02564103, 0.97435897, 0. ]), ' ', array([ 0., 0., 1., 0.])), ('RPE5W24', ': ', array([ 1, 0, 40, 0]), ' ', array([ 0.02439024, 0. , 0.97560976, 0. ]), ' ', array([ 0., 0., 1., 0.])), ('RPE5W27', ': ', array([ 0, 0, …	110	0.988227	0.361905	0.999961	1
412	X	74968592	GTAxACA	G	C	[('RPE5W22', ': ', array([ 0, 0, 0, 62]), ' ', array([ 0., 0., 0., 1.]), ' ', array([ 0., 0., 0., 1.])), ('RPE5W23', ': ', array([ 0, 0, 0, 31]), ' ', array([ 0., 0., 0., 1.]), ' ', array([ 0., 0., 0., 1.])), ('RPE5W24', ': ', array([ 0, 0, 0, 41]), ' ', array([ 0., 0., 0., 1.]), ' ', array([ 0., 0., 0., 1.])), ('RPE5W27', ': ', array([ 0, 0, 0, 25]), ' ', array([ 0., 0., 0., 1.]), ' ', array([ 0…	1110	1	0.358063	1	1
413	X	77977005	GAAxAAA	T	C	[('RPE5W22', ': ', array([ 0, 51, 0, 0]), ' ', array([ 0., 1., 0., 0.]), ' ', array([ 0., 1., 0., 0.])), ('RPE5W23', ': ', array([ 0, 40, 0, 0]), ' ', array([ 0., 1., 0., 0.]), ' ', array([ 0., 1., 0., 0.])), ('RPE5W24', ': ', array([ 0, 31, 0, 0]), ' ', array([ 0., 1., 0., 0.]), ' ', array([ 0., 1., 0., 0.])), ('RPE5W27', ': ', array([ 0, 36, 0, 0]), ' ', array([ 0., 1., 0., 0.]), ' ', array([ 0…	1110	0.985801	0.295726	0.995544	1
414	X	127038543	CTCxATA	A	C	[('RPE5W22', ': ', array([36, 0, 0, 0]), ' ', array([ 1., 0., 0., 0.]), ' ', array([ 1., 0., 0., 0.])), ('RPE5W23', ': ', array([43, 0, 0, 0]), ' ', array([ 1., 0., 0., 0.]), ' ', array([ 1., 0., 0., 0.])), ('RPE5W24', ': ', array([28, 0, 0, 0]), ' ', array([ 1., 0., 0., 0.]), ' ', array([ 1., 0., 0., 0.])), ('RPE5W27', ': ', array([39, 0, 0, 0]), ' ', array([ 1., 0., 0., 0.]), ' ', array([ 1., 0…	1110	0.998051	0.350524	0.999999	1
415	X	138409946	CACxATA	T	A	[('RPE5W22', ': ', array([ 0, 50, 0, 0]), ' ', array([ 0., 1., 0., 0.]), ' ', array([ 0., 1., 0., 0.])), ('RPE5W23', ': ', array([ 0, 34, 0, 0]), ' ', array([ 0., 1., 0., 0.]), ' ', array([ 0., 1., 0., 0.])), ('RPE5W24', ': ', array([ 0, 46, 0, 0]), ' ', array([ 0., 1., 0., 0.]), ' ', array([ 0., 1., 0., 0.])), ('RPE5W27', ': ', array([ 0, 36, 0, 0]), ' ', array([ 0., 1., 0., 0.]), ' ', array([ 0…	1110	1	0.385644	1	1
416	1	31348346	CCCxAAG	C	A	[('RPE5W22', ': ', array([ 0, 0, 57, 0]), ' ', array([ 0., 0., 1., 0.]), ' ', array([ 0., 0., 1., 0.])), ('RPE5W23', ': ', array([ 0, 0, 38, 0]), ' ', array([ 0., 0., 1., 0.]), ' ', array([ 0., 0., 1., 0.])), ('RPE5W24', ': ', array([ 0, 0, 32, 1]), ' ', array([ 0. , 0. , 0.96969697, 0.03030303]), ' ', array([ 0., 0., 1., 0.])), ('RPE5W27', ': ', array([ 0, 0, 42, 0]), ' ', array([ 0., 0., 1., 0.…	110	0.991251	0.305235	0.999998	1
417	5	18851325	ATTxAGA	C	T	[('RPE5W22', ': ', array([ 1, 0, 65, 0]), ' ', array([ 0.01515152, 0. , 0.98484848, 0. ]), ' ', array([ 0., 0., 1., 0.])), ('RPE5W23', ': ', array([ 1, 0, 63, 0]), ' ', array([ 0.015625, 0. , 0.984375, 0. ]), ' ', array([ 0., 0., 1., 0.])), ('RPE5W24', ': ', array([ 0, 0, 51, 0]), ' ', array([ 0., 0., 1., 0.]), ' ', array([ 0., 0., 1., 0.])), ('RPE5W27', ': ', array([ 1, 0, 59, 1]), ' ', array([ …	110	0.987628	0.169631	0.999913	1
418	11	22884404	CAGxAAT	G	T	[('RPE5W22', ': ', array([ 0, 0, 0, 81]), ' ', array([ 0., 0., 0., 1.]), ' ', array([ 0., 0., 0., 1.])), ('RPE5W23', ': ', array([ 0, 0, 0, 52]), ' ', array([ 0., 0., 0., 1.]), ' ', array([ 0., 0., 0., 1.])), ('RPE5W24', ': ', array([ 0, 0, 0, 56]), ' ', array([ 0., 0., 0., 1.]), ' ', array([ 0., 0., 0., 1.])), ('RPE5W27', ': ', array([ 0, 0, 0, 57]), ' ', array([ 0., 0., 0., 1.]), ' ', array([ 0…	110	0.992252	0.291944	1	1
419	15	62932410	GTGxAGA	G	T	[('RPE5W22', ': ', array([ 0, 0, 0, 48]), ' ', array([ 0., 0., 0., 1.]), ' ', array([ 0., 0., 0., 1.])), ('RPE5W23', ': ', array([ 0, 0, 1, 40]), ' ', array([ 0. , 0. , 0.02439024, 0.97560976]), ' ', array([ 0., 0., 0., 1.])), ('RPE5W24', ': ', array([ 0, 1, 0, 34]), ' ', array([ 0. , 0.02857143, 0. , 0.97142857]), ' ', array([ 0., 0., 0., 1.])), ('RPE5W27', ': ', array([ 0, 0, 0, 35]), ' ', arra…	110	0.994643	0.26348	0.999964	1
420	X	149728937	GGTxTGA	A	G	[('RPE5W22', ': ', array([54, 0, 0, 1]), ' ', array([ 0.98181818, 0. , 0. , 0.01818182]), ' ', array([ 1., 0., 0., 0.])), ('RPE5W23', ': ', array([38, 0, 1, 1]), ' ', array([ 0.95 , 0. , 0.025, 0.025]), ' ', array([ 1., 0., 0., 0.])), ('RPE5W24', ': ', array([30, 1, 0, 0]), ' ', array([ 0.96774194, 0.03225806, 0. , 0. ]), ' ', array([ 1., 0., 0., 0.])), ('RPE5W27', ': ', array([27, 0, 0, 0]), ' '…	110	0.98889	0.279514	0.999992	1
421	1	14423579	GTAxGGG	G	T	[('RPE5W22', ': ', array([ 0, 0, 0, 58]), ' ', array([ 0., 0., 0., 1.]), ' ', array([ 0., 0., 0., 1.])), ('RPE5W23', ': ', array([ 1, 0, 0, 43]), ' ', array([ 0.02272727, 0. , 0. , 0.97727273]), ' ', array([ 0., 0., 0., 1.])), ('RPE5W24', ': ', array([ 0, 0, 0, 29]), ' ', array([ 0., 0., 0., 1.]), ' ', array([ 0., 0., 0., 1.])), ('RPE5W27', ': ', array([ 0, 0, 0, 33]), ' ', array([ 0., 0., 0., 1.…	110010000	0.996528	0.369099	1	1
422	1	43473129	TCCxCTG	G	A	[('RPE5W22', ': ', array([ 0, 0, 0, 54]), ' ', array([ 0., 0., 0., 1.]), ' ', array([ 0., 0., 0., 1.])), ('RPE5W23', ': ', array([ 0, 0, 0, 30]), ' ', array([ 0. , 0. , 0. , 0.96774194]), ' ', array([ 0., 0., 0., 1.])), ('RPE5W24', ': ', array([ 0, 0, 0, 30]), ' ', array([ 0., 0., 0., 1.]), ' ', array([ 0., 0., 0., 1.])), ('RPE5W27', ': ', array([ 0, 0, 0, 42]), ' ', array([ 0., 0., 0., 1.]), ' '…	110010000	0.994298	0.348776	1	1
423	1	73249083	TATxTAA	C	G	[('RPE5W22', ': ', array([ 0, 0, 48, 2]), ' ', array([ 0. , 0. , 0.96, 0.04]), ' ', array([ 0., 0., 1., 0.])), ('RPE5W23', ': ', array([ 2, 0, 27, 0]), ' ', array([ 0.06896552, 0. , 0.93103448, 0. ]), ' ', array([ 0., 0., 1., 0.])), ('RPE5W24', ': ', array([ 0, 0, 52, 0]), ' ', array([ 0., 0., 1., 0.]), ' ', array([ 0., 0., 1., 0.])), ('RPE5W27', ': ', array([ 0, 0, 38, 0]), ' ', array([ 0., 0., …	110010000	0.983668	0.399614	1	1
424	1	106208306	TTTxTTG	A	T	[('RPE5W22', ': ', array([55, 0, 0, 0]), ' ', array([ 1., 0., 0., 0.]), ' ', array([ 1., 0., 0., 0.])), ('RPE5W23', ': ', array([26, 0, 0, 0]), ' ', array([ 1., 0., 0., 0.]), ' ', array([ 1., 0., 0., 0.])), ('RPE5W24', ': ', array([40, 1, 1, 0]), ' ', array([ 0.95238095, 0.02380952, 0.02380952, 0. ]), ' ', array([ 1., 0., 0., 0.])), ('RPE5W27', ': ', array([36, 0, 1, 0]), ' ', array([ 0.97297297,…	110010000	0.991706	0.327586	0.999256	1
425	1	113439551	TTTxACA	T	G	[('RPE5W22', ': ', array([ 0, 72, 0, 1]), ' ', array([ 0. , 0.98630137, 0. , 0.01369863]), ' ', array([ 0., 1., 0., 0.])), ('RPE5W23', ': ', array([ 0, 37, 0, 0]), ' ', array([ 0., 1., 0., 0.]), ' ', array([ 0., 1., 0., 0.])), ('RPE5W24', ': ', array([ 1, 34, 0, 0]), ' ', array([ 0.02857143, 0.97142857, 0. , 0. ]), ' ', array([ 0., 1., 0., 0.])), ('RPE5W27', ': ', array([ 0, 40, 0, 0]), ' ', arra…	110010000	0.991831	0.287749	0.999885	1
426	1	177587323	GTTxCAA	G	T	[('RPE5W22', ': ', array([ 0, 0, 1, 55]), ' ', array([ 0. , 0. , 0.01785714, 0.98214286]), ' ', array([ 0., 0., 0., 1.])), ('RPE5W23', ': ', array([ 0, 0, 0, 34]), ' ', array([ 0., 0., 0., 1.]), ' ', array([ 0., 0., 0., 1.])), ('RPE5W24', ': ', array([ 0, 1, 0, 34]), ' ', array([ 0. , 0.02857143, 0. , 0.97142857]), ' ', array([ 0., 0., 0., 1.])), ('RPE5W27', ': ', array([ 1, 0, 0, 37]), ' ', arra…	111110000	0.980424	0.322491	0.999998	1
427	1	187259121	CCCxGGC	G	T	[('RPE5W22', ': ', array([ 0, 0, 1, 37]), ' ', array([ 0. , 0. , 0.02631579, 0.97368421]), ' ', array([ 0., 0., 0., 1.])), ('RPE5W23', ': ', array([ 0, 0, 0, 33]), ' ', array([ 0., 0., 0., 1.]), ' ', array([ 0., 0., 0., 1.])), ('RPE5W24', ': ', array([ 0, 1, 0, 37]), ' ', array([ 0. , 0.02631579, 0. , 0.97368421]), ' ', array([ 0., 0., 0., 1.])), ('RPE5W27', ': ', array([ 0, 0, 0, 34]), ' ', arra…	111110000	0.992481	0.369186	1	1
428	2	32929735	AGGxTCC	C	A	[('RPE5W22', ': ', array([ 0, 0, 44, 0]), ' ', array([ 0., 0., 1., 0.]), ' ', array([ 0., 0., 1., 0.])), ('RPE5W23', ': ', array([ 0, 0, 42, 0]), ' ', array([ 0., 0., 1., 0.]), ' ', array([ 0., 0., 1., 0.])), ('RPE5W24', ': ', array([ 0, 0, 28, 0]), ' ', array([ 0., 0., 1., 0.]), ' ', array([ 0., 0., 1., 0.])), ('RPE5W27', ': ', array([ 0, 0, 34, 0]), ' ', array([ 0., 0., 1., 0.]), ' ', array([ 0…	110010000	1	0.296296	0.999236	1
429	2	58717283	TGGxAGG	G	A	[('RPE5W22', ': ', array([ 0, 0, 0, 45]), ' ', array([ 0., 0., 0., 1.]), ' ', array([ 0., 0., 0., 1.])), ('RPE5W23', ': ', array([ 0, 0, 0, 39]), ' ', array([ 0., 0., 0., 1.]), ' ', array([ 0., 0., 0., 1.])), ('RPE5W24', ': ', array([ 0, 1, 0, 45]), ' ', array([ 0. , 0.02173913, 0. , 0.97826087]), ' ', array([ 0., 0., 0., 1.])), ('RPE5W27', ': ', array([ 0, 0, 0, 33]), ' ', array([ 0., 0., 0., 1.…	111110000	0.996894	0.367997	1	1
430	2	77271104	ATTxCAG	C	A	[('RPE5W22', ': ', array([ 0, 0, 53, 0]), ' ', array([ 0., 0., 1., 0.]), ' ', array([ 0., 0., 1., 0.])), ('RPE5W23', ': ', array([ 0, 0, 34, 1]), ' ', array([ 0. , 0. , 0.97142857, 0.02857143]), ' ', array([ 0., 0., 1., 0.])), ('RPE5W24', ': ', array([ 0, 0, 40, 0]), ' ', array([ 0., 0., 1., 0.]), ' ', array([ 0., 0., 1., 0.])), ('RPE5W27', ': ', array([ 0, 0, 43, 0]), ' ', array([ 0., 0., 1., 0.…	110010000	0.989947	0.320584	0.999989	1
431	2	81363620	TGAxATC	G	T	[('RPE5W22', ': ', array([ 0, 0, 0, 46]), ' ', array([ 0., 0., 0., 1.]), ' ', array([ 0., 0., 0., 1.])), ('RPE5W23', ': ', array([ 0, 0, 0, 57]), ' ', array([ 0., 0., 0., 1.]), ' ', array([ 0., 0., 0., 1.])), ('RPE5W24', ': ', array([ 0, 0, 0, 37]), ' ', array([ 0., 0., 0., 1.]), ' ', array([ 0., 0., 0., 1.])), ('RPE5W27', ': ', array([ 0, 0, 0, 52]), ' ', array([ 0., 0., 0., 1.]), ' ', array([ 0…	111110000	1	0.35731	1	1
432	2	120405454	AATxAGA	T	A	[('RPE5W22', ': ', array([ 0, 42, 0, 0]), ' ', array([ 0., 1., 0., 0.]), ' ', array([ 0., 1., 0., 0.])), ('RPE5W23', ': ', array([ 0, 42, 0, 0]), ' ', array([ 0., 1., 0., 0.]), ' ', array([ 0., 1., 0., 0.])), ('RPE5W24', ': ', array([ 0, 33, 0, 0]), ' ', array([ 0., 1., 0., 0.]), ' ', array([ 0., 1., 0., 0.])), ('RPE5W27', ': ', array([ 0, 35, 0, 0]), ' ', array([ 0., 1., 0., 0.]), ' ', array([ 0…	111110000	1	0.348807	1	1
433	2	153308012	TTGxATC	G	T	[('RPE5W22', ': ', array([ 0, 0, 0, 58]), ' ', array([ 0., 0., 0., 1.]), ' ', array([ 0., 0., 0., 1.])), ('RPE5W23', ': ', array([ 0, 0, 0, 28]), ' ', array([ 0., 0., 0., 1.]), ' ', array([ 0., 0., 0., 1.])), ('RPE5W24', ': ', array([ 0, 0, 0, 33]), ' ', array([ 0., 0., 0., 1.]), ' ', array([ 0., 0., 0., 1.])), ('RPE5W27', ': ', array([ 0, 0, 0, 26]), ' ', array([ 0., 0., 0., 1.]), ' ', array([ 0…	110010000	0.993808	0.33798	0.999999	1
434	2	189010315	ACTxATG	C	T	[('RPE5W22', ': ', array([ 0, 0, 60, 1]), ' ', array([ 0. , 0. , 0.98360656, 0.01639344]), ' ', array([ 0., 0., 1., 0.])), ('RPE5W23', ': ', array([ 0, 0, 49, 0]), ' ', array([ 0., 0., 1., 0.]), ' ', array([ 0., 0., 1., 0.])), ('RPE5W24', ': ', array([ 1, 0, 37, 0]), ' ', array([ 0.02631579, 0. , 0.97368421, 0. ]), ' ', array([ 0., 0., 1., 0.])), ('RPE5W27', ': ', array([ 2, 0, 31, 0]), ' ', arra…	110010000	0.976946	0.235804	0.997099	1
435	2	194655307	CATxTAA	A	T	[('RPE5W22', ': ', array([40, 0, 0, 0]), ' ', array([ 1., 0., 0., 0.]), ' ', array([ 1., 0., 0., 0.])), ('RPE5W23', ': ', array([36, 0, 0, 0]), ' ', array([ 1., 0., 0., 0.]), ' ', array([ 1., 0., 0., 0.])), ('RPE5W24', ': ', array([31, 0, 0, 0]), ' ', array([ 1., 0., 0., 0.]), ' ', array([ 1., 0., 0., 0.])), ('RPE5W27', ': ', array([35, 0, 0, 0]), ' ', array([ 1., 0., 0., 0.]), ' ', array([ 1., 0…	111110000	0.997449	0.356094	1	1
436	2	221549758	CAGxTCT	G	C	[('RPE5W22', ': ', array([ 0, 0, 0, 47]), ' ', array([ 0., 0., 0., 1.]), ' ', array([ 0., 0., 0., 1.])), ('RPE5W23', ': ', array([ 0, 1, 0, 37]), ' ', array([ 0. , 0.02631579, 0. , 0.97368421]), ' ', array([ 0., 0., 0., 1.])), ('RPE5W24', ': ', array([ 0, 0, 0, 43]), ' ', array([ 0., 0., 0., 1.]), ' ', array([ 0., 0., 0., 1.])), ('RPE5W27', ': ', array([ 0, 0, 0, 46]), ' ', array([ 0., 0., 0., 1.…	111110000	1	0.312054	0.999996	1
437	2	240218839	TGTxCTG	G	T	[('RPE5W22', ': ', array([ 0, 1, 0, 43]), ' ', array([ 0. , 0.02272727, 0. , 0.97727273]), ' ', array([ 0., 0., 0., 1.])), ('RPE5W23', ': ', array([ 0, 0, 2, 46]), ' ', array([ 0. , 0. , 0.04166667, 0.95833333]), ' ', array([ 0., 0., 0., 1.])), ('RPE5W24', ': ', array([ 0, 0, 0, 33]), ' ', array([ 0., 0., 0., 1.]), ' ', array([ 0., 0., 0., 1.])), ('RPE5W27', ': ', array([ 0, 0, 0, 32]), ' ', arra…	110010000	0.987739	0.328101	0.999992	1
438	3	28276186	TTTxTCA	C	A	[('RPE5W22', ': ', array([ 0, 0, 59, 0]), ' ', array([ 0., 0., 1., 0.]), ' ', array([ 0., 0., 1., 0.])), ('RPE5W23', ': ', array([ 1, 0, 32, 0]), ' ', array([ 0.03030303, 0. , 0.96969697, 0. ]), ' ', array([ 0., 0., 1., 0.])), ('RPE5W24', ': ', array([ 0, 1, 36, 0]), ' ', array([ 0. , 0.02702703, 0.97297297, 0. ]), ' ', array([ 0., 0., 1., 0.])), ('RPE5W27', ': ', array([ 0, 0, 30, 0]), ' ', arra…	110010000	0.983511	0.355324	0.999988	1
439	3	40065678	TTTxTTG	C	A	[('RPE5W22', ': ', array([ 0, 0, 54, 0]), ' ', array([ 0., 0., 1., 0.]), ' ', array([ 0., 0., 1., 0.])), ('RPE5W23', ': ', array([ 0, 0, 47, 0]), ' ', array([ 0., 0., 1., 0.]), ' ', array([ 0., 0., 1., 0.])), ('RPE5W24', ': ', array([ 0, 0, 40, 0]), ' ', array([ 0., 0., 1., 0.]), ' ', array([ 0., 0., 1., 0.])), ('RPE5W27', ': ', array([ 0, 0, 33, 0]), ' ', array([ 0., 0., 1., 0.]), ' ', array([ 0…	111110000	1	0.344329	0.999994	1
440	3	62854502	TGTxCAG	C	A	[('RPE5W22', ': ', array([ 1, 0, 50, 0]), ' ', array([ 0.01960784, 0. , 0.98039216, 0. ]), ' ', array([ 0., 0., 1., 0.])), ('RPE5W23', ': ', array([ 0, 1, 37, 0]), ' ', array([ 0. , 0.02631579, 0.97368421, 0. ]), ' ', array([ 0., 0., 1., 0.])), ('RPE5W24', ': ', array([ 0, 0, 38, 0]), ' ', array([ 0., 0., 1., 0.]), ' ', array([ 0., 0., 1., 0.])), ('RPE5W27', ': ', array([ 0, 0, 39, 0]), ' ', arra…	111110000	0.997199	0.322282	0.999999	1
441	3	144260153	AATxAAC	A	C	[('RPE5W22', ': ', array([45, 0, 0, 0]), ' ', array([ 1., 0., 0., 0.]), ' ', array([ 1., 0., 0., 0.])), ('RPE5W23', ': ', array([39, 0, 0, 0]), ' ', array([ 1., 0., 0., 0.]), ' ', array([ 1., 0., 0., 0.])), ('RPE5W24', ': ', array([49, 0, 0, 0]), ' ', array([ 1., 0., 0., 0.]), ' ', array([ 1., 0., 0., 0.])), ('RPE5W27', ': ', array([35, 0, 0, 0]), ' ', array([ 1., 0., 0., 0.]), ' ', array([ 1., 0…	110010000	0.996914	0.283183	0.999733	1
442	3	162860225	AATxATT	C	A	[('RPE5W22', ': ', array([ 1, 0, 59, 0]), ' ', array([ 0.01666667, 0. , 0.98333333, 0. ]), ' ', array([ 0., 0., 1., 0.])), ('RPE5W23', ': ', array([ 1, 0, 26, 0]), ' ', array([ 0.03703704, 0. , 0.96296296, 0. ]), ' ', array([ 0., 0., 1., 0.])), ('RPE5W24', ': ', array([ 1, 0, 42, 0]), ' ', array([ 0.02325581, 0. , 0.97674419, 0. ]), ' ', array([ 0., 0., 1., 0.])), ('RPE5W27', ': ', array([ 1, 0, …	110010000	0.979449	0.285885	0.99971	1
443	3	165047336	AGTxGTT	T	G	[('RPE5W22', ': ', array([ 0, 57, 0, 0]), ' ', array([ 0., 1., 0., 0.]), ' ', array([ 0., 1., 0., 0.])), ('RPE5W23', ': ', array([ 0, 37, 0, 0]), ' ', array([ 0., 1., 0., 0.]), ' ', array([ 0., 1., 0., 0.])), ('RPE5W24', ': ', array([ 0, 29, 0, 0]), ' ', array([ 0., 1., 0., 0.]), ' ', array([ 0., 1., 0., 0.])), ('RPE5W27', ': ', array([ 0, 43, 0, 0]), ' ', array([ 0., 1., 0., 0.]), ' ', array([ 0…	111110000	0.99127	0.307308	0.999971	1
444	3	165911977	TTTxTCA	G	T	[('RPE5W22', ': ', array([ 0, 0, 0, 47]), ' ', array([ 0., 0., 0., 1.]), ' ', array([ 0., 0., 0., 1.])), ('RPE5W23', ': ', array([ 0, 0, 0, 36]), ' ', array([ 0., 0., 0., 1.]), ' ', array([ 0., 0., 0., 1.])), ('RPE5W24', ': ', array([ 0, 0, 0, 41]), ' ', array([ 0., 0., 0., 1.]), ' ', array([ 0., 0., 0., 1.])), ('RPE5W27', ': ', array([ 0, 0, 0, 33]), ' ', array([ 0., 0., 0., 1.]), ' ', array([ 0…	111110000	0.997354	0.249993	0.999835	1
445	4	61319630	CTTxTAT	C	G	[('RPE5W22', ': ', array([ 0, 0, 51, 0]), ' ', array([ 0., 0., 1., 0.]), ' ', array([ 0., 0., 1., 0.])), ('RPE5W23', ': ', array([ 0, 0, 37, 1]), ' ', array([ 0. , 0. , 0.97368421, 0.02631579]), ' ', array([ 0., 0., 1., 0.])), ('RPE5W24', ': ', array([ 0, 0, 52, 1]), ' ', array([ 0. , 0. , 0.98113208, 0.01886792]), ' ', array([ 0., 0., 1., 0.])), ('RPE5W27', ': ', array([ 0, 0, 46, 0]), ' ', arra…	110010000	0.994072	0.431468	1	1
446	4	65505456	GTTxTGA	C	T	[('RPE5W22', ': ', array([ 0, 0, 58, 0]), ' ', array([ 0., 0., 1., 0.]), ' ', array([ 0., 0., 1., 0.])), ('RPE5W23', ': ', array([ 0, 0, 34, 0]), ' ', array([ 0., 0., 1., 0.]), ' ', array([ 0., 0., 1., 0.])), ('RPE5W24', ': ', array([ 0, 0, 43, 0]), ' ', array([ 0., 0., 1., 0.]), ' ', array([ 0., 0., 1., 0.])), ('RPE5W27', ': ', array([ 0, 0, 39, 0]), ' ', array([ 0., 0., 1., 0.]), ' ', array([ 0…	110010000	0.996528	0.305144	0.999955	1
447	4	89987370	AGTxGAA	G	C	[('RPE5W22', ': ', array([ 0, 0, 0, 39]), ' ', array([ 0., 0., 0., 1.]), ' ', array([ 0., 0., 0., 1.])), ('RPE5W23', ': ', array([ 0, 0, 0, 38]), ' ', array([ 0., 0., 0., 1.]), ' ', array([ 0., 0., 0., 1.])), ('RPE5W24', ': ', array([ 0, 0, 0, 42]), ' ', array([ 0., 0., 0., 1.]), ' ', array([ 0., 0., 0., 1.])), ('RPE5W27', ': ', array([ 0, 0, 0, 30]), ' ', array([ 0., 0., 0., 1.]), ' ', array([ 0…	111110000	0.991183	0.430694	1	1
448	4	164451910	ACCxGTA	G	A	[('RPE5W22', ': ', array([ 0, 0, 0, 51]), ' ', array([ 0., 0., 0., 1.]), ' ', array([ 0., 0., 0., 1.])), ('RPE5W23', ': ', array([ 0, 0, 1, 29]), ' ', array([ 0. , 0. , 0.03333333, 0.96666667]), ' ', array([ 0., 0., 0., 1.])), ('RPE5W24', ': ', array([ 0, 0, 0, 42]), ' ', array([ 0., 0., 0., 1.]), ' ', array([ 0., 0., 0., 1.])), ('RPE5W27', ': ', array([ 0, 0, 0, 33]), ' ', array([ 0., 0., 0., 1.…	110010000	0.997076	0.365546	1	1
449	4	190555637	CCTxCTC	C	T	[('RPE5W22', ': ', array([ 0, 0, 231, 0]), ' ', array([ 0., 0., 1., 0.]), ' ', array([ 0., 0., 1., 0.])), ('RPE5W23', ': ', array([ 0, 0, 127, 0]), ' ', array([ 0., 0., 1., 0.]), ' ', array([ 0., 0., 1., 0.])), ('RPE5W24', ': ', array([ 0, 0, 153, 0]), ' ', array([ 0., 0., 1., 0.]), ' ', array([ 0., 0., 1., 0.])), ('RPE5W27', ': ', array([ 1, 0, 136, 0]), ' ', array([ 0.00729927, 0. , 0.99270073,…	110010000	0.995427	0.0897985	0.999992	1
450	5	862365	TCCxATC	C	T	[('RPE5W22', ': ', array([ 0, 0, 77, 0]), ' ', array([ 0., 0., 1., 0.]), ' ', array([ 0., 0., 1., 0.])), ('RPE5W23', ': ', array([ 0, 0, 60, 0]), ' ', array([ 0., 0., 1., 0.]), ' ', array([ 0., 0., 1., 0.])), ('RPE5W24', ': ', array([ 0, 0, 65, 0]), ' ', array([ 0., 0., 1., 0.]), ' ', array([ 0., 0., 1., 0.])), ('RPE5W27', ': ', array([ 0, 0, 54, 0]), ' ', array([ 0., 0., 1., 0.]), ' ', array([ 0…	110010000	0.994072	0.20098	0.999897	1
451	5	7194478	TCTxCAG	G	T	[('RPE5W22', ': ', array([ 0, 0, 0, 47]), ' ', array([ 0., 0., 0., 1.]), ' ', array([ 0., 0., 0., 1.])), ('RPE5W23', ': ', array([ 0, 0, 0, 33]), ' ', array([ 0., 0., 0., 1.]), ' ', array([ 0., 0., 0., 1.])), ('RPE5W24', ': ', array([ 1, 0, 0, 28]), ' ', array([ 0.03448276, 0. , 0. , 0.96551724]), ' ', array([ 0., 0., 0., 1.])), ('RPE5W27', ': ', array([ 0, 0, 0, 35]), ' ', array([ 0., 0., 0., 1.…	110010000	0.988191	0.374003	1	1
452	5	11045763	TCTxTTA	C	A	[('RPE5W22', ': ', array([ 0, 0, 63, 1]), ' ', array([ 0. , 0. , 0.984375, 0.015625]), ' ', array([ 0., 0., 1., 0.])), ('RPE5W23', ': ', array([ 0, 0, 40, 0]), ' ', array([ 0., 0., 1., 0.]), ' ', array([ 0., 0., 1., 0.])), ('RPE5W24', ': ', array([ 0, 0, 61, 0]), ' ', array([ 0., 0., 1., 0.]), ' ', array([ 0., 0., 1., 0.])), ('RPE5W27', ': ', array([ 0, 0, 39, 0]), ' ', array([ 0., 0., 1., 0.]), …	110010000	0.99568	0.221594	0.999703	1
453	5	23702266	TTAxGTT	G	T	[('RPE5W22', ': ', array([ 0, 3, 0, 82]), ' ', array([ 0. , 0.03529412, 0. , 0.96470588]), ' ', array([ 0., 0., 0., 1.])), ('RPE5W23', ': ', array([ 1, 0, 1, 51]), ' ', array([ 0.01886792, 0. , 0.01886792, 0.96226415]), ' ', array([ 0., 0., 0., 1.])), ('RPE5W24', ': ', array([ 1, 0, 0, 54]), ' ', array([ 0.01818182, 0. , 0. , 0.98181818]), ' ', array([ 0., 0., 0., 1.])), ('RPE5W27', ': ', array([…	111110000	0.984119	0.248673	0.999999	1
454	5	50424142	CAGxAGA	C	G	[('RPE5W22', ': ', array([ 0, 0, 60, 0]), ' ', array([ 0., 0., 1., 0.]), ' ', array([ 0., 0., 1., 0.])), ('RPE5W23', ': ', array([ 0, 0, 42, 0]), ' ', array([ 0., 0., 1., 0.]), ' ', array([ 0., 0., 1., 0.])), ('RPE5W24', ': ', array([ 0, 0, 37, 0]), ' ', array([ 0., 0., 1., 0.]), ' ', array([ 0., 0., 1., 0.])), ('RPE5W27', ': ', array([ 0, 0, 51, 0]), ' ', array([ 0., 0., 1., 0.]), ' ', array([ 0…	111110000	0.996678	0.26562	1	1
455	5	138872184	GAAxTGC	T	C	[('RPE5W22', ': ', array([ 0, 76, 0, 0]), ' ', array([ 0., 1., 0., 0.]), ' ', array([ 0., 1., 0., 0.])), ('RPE5W23', ': ', array([ 0, 40, 0, 0]), ' ', array([ 0., 1., 0., 0.]), ' ', array([ 0., 1., 0., 0.])), ('RPE5W24', ': ', array([ 0, 40, 0, 0]), ' ', array([ 0., 1., 0., 0.]), ' ', array([ 0., 1., 0., 0.])), ('RPE5W27', ': ', array([ 0, 46, 0, 0]), ' ', array([ 0., 1., 0., 0.]), ' ', array([ 0…	110010000	0.987604	0.252375	1	1
456	5	154993025	GCCxGGG	A	T	[('RPE5W22', ': ', array([53, 1, 0, 0]), ' ', array([ 0.98148148, 0.01851852, 0. , 0. ]), ' ', array([ 1., 0., 0., 0.])), ('RPE5W23', ': ', array([60, 0, 0, 2]), ' ', array([ 0.96774194, 0. , 0. , 0.03225806]), ' ', array([ 1., 0., 0., 0.])), ('RPE5W24', ': ', array([46, 0, 0, 0]), ' ', array([ 1., 0., 0., 0.]), ' ', array([ 1., 0., 0., 0.])), ('RPE5W27', ': ', array([42, 0, 1, 0]), ' ', array([ …	111110000	0.988318	0.269583	1	1
457	6	29408470	CCGxATC	G	T	[('RPE5W22', ': ', array([ 0, 0, 0, 52]), ' ', array([ 0., 0., 0., 1.]), ' ', array([ 0., 0., 0., 1.])), ('RPE5W23', ': ', array([ 0, 0, 0, 45]), ' ', array([ 0., 0., 0., 1.]), ' ', array([ 0., 0., 0., 1.])), ('RPE5W24', ': ', array([ 0, 0, 0, 47]), ' ', array([ 0., 0., 0., 1.]), ' ', array([ 0., 0., 0., 1.])), ('RPE5W27', ': ', array([ 0, 1, 2, 40]), ' ', array([ 0. , 0.02325581, 0.04651163, 0.9…	111110000	0.982514	0.31453	0.999981	1
458	6	64620672	AAGxAAA	A	G	[('RPE5W22', ': ', array([69, 0, 0, 0]), ' ', array([ 1., 0., 0., 0.]), ' ', array([ 1., 0., 0., 0.])), ('RPE5W23', ': ', array([36, 0, 0, 0]), ' ', array([ 1., 0., 0., 0.]), ' ', array([ 1., 0., 0., 0.])), ('RPE5W24', ': ', array([39, 0, 0, 0]), ' ', array([ 1., 0., 0., 0.]), ' ', array([ 1., 0., 0., 0.])), ('RPE5W27', ': ', array([45, 0, 0, 1]), ' ', array([ 0.97826087, 0. , 0. , 0.02173913]), …	110010000	0.995488	0.342262	0.999997	1
459	6	79192002	CATxTGC	G	T	[('RPE5W22', ': ', array([ 0, 0, 0, 67]), ' ', array([ 0., 0., 0., 1.]), ' ', array([ 0., 0., 0., 1.])), ('RPE5W23', ': ', array([ 0, 0, 0, 40]), ' ', array([ 0., 0., 0., 1.]), ' ', array([ 0., 0., 0., 1.])), ('RPE5W24', ': ', array([ 0, 0, 0, 41]), ' ', array([ 0., 0., 0., 1.]), ' ', array([ 0., 0., 0., 1.])), ('RPE5W27', ': ', array([ 0, 0, 0, 36]), ' ', array([ 0., 0., 0., 1.]), ' ', array([ 0…	110010000	0.986795	0.385373	1	1
460	6	95601033	CAGxATT	A	T	[('RPE5W22', ': ', array([38, 0, 0, 0]), ' ', array([ 1., 0., 0., 0.]), ' ', array([ 1., 0., 0., 0.])), ('RPE5W23', ': ', array([38, 1, 0, 0]), ' ', array([ 0.97435897, 0.02564103, 0. , 0. ]), ' ', array([ 1., 0., 0., 0.])), ('RPE5W24', ': ', array([28, 1, 1, 0]), ' ', array([ 0.93333333, 0.03333333, 0.03333333, 0. ]), ' ', array([ 1., 0., 0., 0.])), ('RPE5W27', ': ', array([31, 0, 0, 0]), ' ', a…	110010000	0.981241	0.44697	1	1
461	6	119415986	GGGxTCA	C	A	[('RPE5W22', ': ', array([ 0, 0, 48, 0]), ' ', array([ 0., 0., 1., 0.]), ' ', array([ 0., 0., 1., 0.])), ('RPE5W23', ': ', array([ 1, 0, 37, 0]), ' ', array([ 0.02631579, 0. , 0.97368421, 0. ]), ' ', array([ 0., 0., 1., 0.])), ('RPE5W24', ': ', array([ 0, 0, 35, 0]), ' ', array([ 0., 0., 1., 0.]), ' ', array([ 0., 0., 1., 0.])), ('RPE5W27', ': ', array([ 0, 0, 29, 1]), ' ', array([ 0. , 0. , 0.96…	110010000	0.988519	0.37284	1	1
462	6	134576043	CTTxTTG	G	T	[('RPE5W22', ': ', array([ 0, 1, 0, 54]), ' ', array([ 0. , 0.01818182, 0. , 0.98181818]), ' ', array([ 0., 0., 0., 1.])), ('RPE5W23', ': ', array([ 0, 0, 0, 35]), ' ', array([ 0., 0., 0., 1.]), ' ', array([ 0., 0., 0., 1.])), ('RPE5W24', ': ', array([ 0, 2, 0, 38]), ' ', array([ 0. , 0.05, 0. , 0.95]), ' ', array([ 0., 0., 0., 1.])), ('RPE5W27', ': ', array([ 0, 1, 1, 37]), ' ', array([ 0. , 0.0…	110010000	0.982895	0.227484	0.996553	1
463	7	9722076	CCTxTTT	C	A	[('RPE5W22', ': ', array([ 0, 1, 63, 0]), ' ', array([ 0. , 0.015625, 0.984375, 0. ]), ' ', array([ 0., 0., 1., 0.])), ('RPE5W23', ': ', array([ 0, 0, 57, 0]), ' ', array([ 0., 0., 1., 0.]), ' ', array([ 0., 0., 1., 0.])), ('RPE5W24', ': ', array([ 0, 0, 40, 0]), ' ', array([ 0., 0., 1., 0.]), ' ', array([ 0., 0., 1., 0.])), ('RPE5W27', ': ', array([ 0, 0, 32, 0]), ' ', array([ 0., 0., 1., 0.]), …	110010000	0.998264	0.267419	0.999993	1
464	7	9829802	TTTxTTT	A	T	[('RPE5W22', ': ', array([70, 0, 0, 0]), ' ', array([ 1., 0., 0., 0.]), ' ', array([ 1., 0., 0., 0.])), ('RPE5W23', ': ', array([53, 0, 0, 0]), ' ', array([ 1., 0., 0., 0.]), ' ', array([ 1., 0., 0., 0.])), ('RPE5W24', ': ', array([55, 0, 0, 0]), ' ', array([ 1., 0., 0., 0.]), ' ', array([ 1., 0., 0., 0.])), ('RPE5W27', ': ', array([42, 0, 0, 0]), ' ', array([ 1., 0., 0., 0.]), ' ', array([ 1., 0…	110010000	0.997732	0.21665	0.999986	1
465	7	28061806	TCAxAAC	C	A	[('RPE5W22', ': ', array([ 0, 0, 67, 0]), ' ', array([ 0., 0., 1., 0.]), ' ', array([ 0., 0., 1., 0.])), ('RPE5W23', ': ', array([ 0, 0, 48, 0]), ' ', array([ 0., 0., 1., 0.]), ' ', array([ 0., 0., 1., 0.])), ('RPE5W24', ': ', array([ 0, 0, 54, 0]), ' ', array([ 0., 0., 1., 0.]), ' ', array([ 0., 0., 1., 0.])), ('RPE5W27', ': ', array([ 0, 0, 61, 0]), ' ', array([ 0., 0., 1., 0.]), ' ', array([ 0…	110010000	0.998179	0.236735	0.999958	1
466	7	50473349	GATxTCC	C	G	[('RPE5W22', ': ', array([ 0, 0, 55, 0]), ' ', array([ 0., 0., 1., 0.]), ' ', array([ 0., 0., 1., 0.])), ('RPE5W23', ': ', array([ 0, 0, 43, 0]), ' ', array([ 0., 0., 1., 0.]), ' ', array([ 0., 0., 1., 0.])), ('RPE5W24', ': ', array([ 0, 0, 40, 0]), ' ', array([ 0., 0., 1., 0.]), ' ', array([ 0., 0., 1., 0.])), ('RPE5W27', ': ', array([ 0, 0, 55, 0]), ' ', array([ 0., 0., 1., 0.]), ' ', array([ 0…	111110000	0.997024	0.219392	0.999995	1
467	7	92472647	CTCxTTA	C	T	[('RPE5W22', ': ', array([ 0, 0, 60, 0]), ' ', array([ 0., 0., 1., 0.]), ' ', array([ 0., 0., 1., 0.])), ('RPE5W23', ': ', array([ 0, 0, 51, 0]), ' ', array([ 0., 0., 1., 0.]), ' ', array([ 0., 0., 1., 0.])), ('RPE5W24', ': ', array([ 0, 0, 56, 0]), ' ', array([ 0., 0., 1., 0.]), ' ', array([ 0., 0., 1., 0.])), ('RPE5W27', ': ', array([ 0, 0, 40, 0]), ' ', array([ 0., 0., 1., 0.]), ' ', array([ 0…	110010000	1	0.266699	1	1
468	7	96274109	TCTxCTC	T	G	[('RPE5W22', ': ', array([ 0, 73, 0, 1]), ' ', array([ 0. , 0.98648649, 0. , 0.01351351]), ' ', array([ 0., 1., 0., 0.])), ('RPE5W23', ': ', array([ 0, 45, 1, 0]), ' ', array([ 0. , 0.97826087, 0.02173913, 0. ]), ' ', array([ 0., 1., 0., 0.])), ('RPE5W24', ': ', array([ 0, 51, 0, 0]), ' ', array([ 0., 1., 0., 0.]), ' ', array([ 0., 1., 0., 0.])), ('RPE5W27', ': ', array([ 0, 52, 0, 0]), ' ', arra…	111110000	0.992075	0.262381	0.999999	1
469	7	113142981	TACxTGG	G	A	[('RPE5W22', ': ', array([ 0, 0, 0, 84]), ' ', array([ 0., 0., 0., 1.]), ' ', array([ 0., 0., 0., 1.])), ('RPE5W23', ': ', array([ 0, 0, 0, 46]), ' ', array([ 0., 0., 0., 1.]), ' ', array([ 0., 0., 0., 1.])), ('RPE5W24', ': ', array([ 0, 1, 0, 49]), ' ', array([ 0. , 0.02, 0. , 0.98]), ' ', array([ 0., 0., 0., 1.])), ('RPE5W27', ': ', array([ 0, 0, 0, 45]), ' ', array([ 0., 0., 0., 1.]), ' ', arr…	110010000	0.993852	0.364025	1	1
470	7	147523610	AAAxTAA	G	A	[('RPE5W22', ': ', array([ 0, 0, 1, 69]), ' ', array([ 0. , 0. , 0.01428571, 0.98571429]), ' ', array([ 0., 0., 0., 1.])), ('RPE5W23', ': ', array([ 0, 0, 0, 51]), ' ', array([ 0., 0., 0., 1.]), ' ', array([ 0., 0., 0., 1.])), ('RPE5W24', ': ', array([ 0, 1, 0, 66]), ' ', array([ 0. , 0.01492537, 0. , 0.98507463]), ' ', array([ 0., 0., 0., 1.])), ('RPE5W27', ': ', array([ 0, 0, 0, 50]), ' ', arra…	111110000	0.985419	0.246502	0.999957	1
471	7	148863360	CGAxTCT	G	C	[('RPE5W22', ': ', array([ 0, 0, 0, 69]), ' ', array([ 0., 0., 0., 1.]), ' ', array([ 0., 0., 0., 1.])), ('RPE5W23', ': ', array([ 0, 0, 0, 46]), ' ', array([ 0., 0., 0., 1.]), ' ', array([ 0., 0., 0., 1.])), ('RPE5W24', ': ', array([ 0, 0, 0, 38]), ' ', array([ 0., 0., 0., 1.]), ' ', array([ 0., 0., 0., 1.])), ('RPE5W27', ': ', array([ 0, 0, 0, 38]), ' ', array([ 0., 0., 0., 1.]), ' ', array([ 0…	110010000	0.991244	0.209826	0.998153	1
472	7	153811916	CACxTGA	C	A	[('RPE5W22', ': ', array([ 0, 0, 70, 0]), ' ', array([ 0., 0., 1., 0.]), ' ', array([ 0., 0., 1., 0.])), ('RPE5W23', ': ', array([ 0, 0, 61, 0]), ' ', array([ 0., 0., 1., 0.]), ' ', array([ 0., 0., 1., 0.])), ('RPE5W24', ': ', array([ 0, 0, 64, 0]), ' ', array([ 0., 0., 1., 0.]), ' ', array([ 0., 0., 1., 0.])), ('RPE5W27', ': ', array([ 0, 0, 48, 0]), ' ', array([ 0., 0., 1., 0.]), ' ', array([ 0…	110010000	0.997416	0.320815	1	1
473	8	3485250	AATxTTT	C	A	[('RPE5W22', ': ', array([ 0, 0, 49, 0]), ' ', array([ 0., 0., 1., 0.]), ' ', array([ 0., 0., 1., 0.])), ('RPE5W23', ': ', array([ 0, 0, 29, 0]), ' ', array([ 0., 0., 1., 0.]), ' ', array([ 0., 0., 1., 0.])), ('RPE5W24', ': ', array([ 0, 0, 35, 0]), ' ', array([ 0., 0., 1., 0.]), ' ', array([ 0., 0., 1., 0.])), ('RPE5W27', ': ', array([ 1, 0, 39, 0]), ' ', array([ 0.025, 0. , 0.975, 0. ]), ' ', a…	110010000	0.985216	0.385648	1	1
474	8	13153797	TGGxTTT	C	A	[('RPE5W22', ': ', array([ 0, 0, 55, 0]), ' ', array([ 0., 0., 1., 0.]), ' ', array([ 0., 0., 1., 0.])), ('RPE5W23', ': ', array([ 0, 1, 33, 0]), ' ', array([ 0. , 0.02941176, 0.97058824, 0. ]), ' ', array([ 0., 0., 1., 0.])), ('RPE5W24', ': ', array([ 1, 0, 32, 0]), ' ', array([ 0.03030303, 0. , 0.96969697, 0. ]), ' ', array([ 0., 0., 1., 0.])), ('RPE5W27', ': ', array([ 0, 0, 30, 0]), ' ', arra…	110010000	0.996633	0.416707	1	1
475	8	59980401	CCCxTTT	G	A	[('RPE5W22', ': ', array([ 0, 0, 0, 53]), ' ', array([ 0., 0., 0., 1.]), ' ', array([ 0., 0., 0., 1.])), ('RPE5W23', ': ', array([ 0, 1, 0, 36]), ' ', array([ 0. , 0.02702703, 0. , 0.97297297]), ' ', array([ 0., 0., 0., 1.])), ('RPE5W24', ': ', array([ 0, 0, 0, 34]), ' ', array([ 0., 0., 0., 1.]), ' ', array([ 0., 0., 0., 1.])), ('RPE5W27', ': ', array([ 0, 0, 0, 35]), ' ', array([ 0., 0., 0., 1.…	110010000	0.990951	0.290979	0.999996	1
476	8	63261804	GTGxAGC	C	A	[('RPE5W22', ': ', array([ 0, 0, 48, 0]), ' ', array([ 0., 0., 1., 0.]), ' ', array([ 0., 0., 1., 0.])), ('RPE5W23', ': ', array([ 0, 0, 28, 0]), ' ', array([ 0., 0., 1., 0.]), ' ', array([ 0., 0., 1., 0.])), ('RPE5W24', ': ', array([ 0, 0, 28, 0]), ' ', array([ 0., 0., 1., 0.]), ' ', array([ 0., 0., 1., 0.])), ('RPE5W27', ': ', array([ 0, 0, 32, 1]), ' ', array([ 0. , 0. , 0.96969697, 0.03030303…	110010000	0.992929	0.443588	1	1
477	8	79071036	GTCxTTT	C	T	[('RPE5W22', ': ', array([ 0, 0, 43, 0]), ' ', array([ 0., 0., 1., 0.]), ' ', array([ 0., 0., 1., 0.])), ('RPE5W23', ': ', array([ 0, 0, 39, 1]), ' ', array([ 0. , 0. , 0.975, 0.025]), ' ', array([ 0., 0., 1., 0.])), ('RPE5W24', ': ', array([ 0, 0, 40, 0]), ' ', array([ 0., 0., 1., 0.]), ' ', array([ 0., 0., 1., 0.])), ('RPE5W27', ': ', array([ 1, 0, 39, 0]), ' ', array([ 0.025, 0. , 0.975, 0. ])…	110010000	0.988123	0.235893	0.999942	1
478	8	113461925	AATxGTG	A	T	[('RPE5W22', ': ', array([51, 0, 0, 0]), ' ', array([ 1., 0., 0., 0.]), ' ', array([ 1., 0., 0., 0.])), ('RPE5W23', ': ', array([40, 0, 0, 0]), ' ', array([ 1., 0., 0., 0.]), ' ', array([ 1., 0., 0., 0.])), ('RPE5W24', ': ', array([42, 0, 2, 0]), ' ', array([ 0.95454545, 0. , 0.04545455, 0. ]), ' ', array([ 1., 0., 0., 0.])), ('RPE5W27', ': ', array([43, 0, 0, 0]), ' ', array([ 1., 0., 0., 0.]), …	111110000	0.993506	0.32787	0.999998	1
479	9	7783237	AAAxAGT	C	G	[('RPE5W22', ': ', array([ 0, 0, 47, 0]), ' ', array([ 0., 0., 1., 0.]), ' ', array([ 0., 0., 1., 0.])), ('RPE5W23', ': ', array([ 0, 0, 38, 0]), ' ', array([ 0., 0., 1., 0.]), ' ', array([ 0., 0., 1., 0.])), ('RPE5W24', ': ', array([ 0, 0, 42, 0]), ' ', array([ 0., 0., 1., 0.]), ' ', array([ 0., 0., 1., 0.])), ('RPE5W27', ': ', array([ 0, 0, 30, 0]), ' ', array([ 0., 0., 1., 0.]), ' ', array([ 0…	111110000	0.995671	0.351084	1	1
480	9	11785998	TTTxTAA	A	T	[('RPE5W22', ': ', array([51, 0, 0, 0]), ' ', array([ 1., 0., 0., 0.]), ' ', array([ 1., 0., 0., 0.])), ('RPE5W23', ': ', array([33, 0, 0, 0]), ' ', array([ 1., 0., 0., 0.]), ' ', array([ 1., 0., 0., 0.])), ('RPE5W24', ': ', array([53, 0, 0, 0]), ' ', array([ 1., 0., 0., 0.]), ' ', array([ 1., 0., 0., 0.])), ('RPE5W27', ': ', array([37, 0, 0, 1]), ' ', array([ 0.97368421, 0. , 0. , 0.02631579]), …	111110000	0.996241	0.322031	0.996706	1
481	9	21738254	GCCxCCA	A	T	[('RPE5W22', ': ', array([54, 0, 1, 0]), ' ', array([ 0.98181818, 0. , 0.01818182, 0. ]), ' ', array([ 1., 0., 0., 0.])), ('RPE5W23', ': ', array([36, 0, 0, 0]), ' ', array([ 1., 0., 0., 0.]), ' ', array([ 1., 0., 0., 0.])), ('RPE5W24', ': ', array([31, 0, 0, 1]), ' ', array([ 0.96875, 0. , 0. , 0.03125]), ' ', array([ 1., 0., 0., 0.])), ('RPE5W27', ': ', array([40, 0, 0, 0]), ' ', array([ 1., 0.…	110010000	0.978367	0.218254	0.999959	1
482	9	30970292	CTCxCCC	G	T	[('RPE5W22', ': ', array([ 0, 0, 0, 49]), ' ', array([ 0., 0., 0., 1.]), ' ', array([ 0., 0., 0., 1.])), ('RPE5W23', ': ', array([ 0, 0, 0, 31]), ' ', array([ 0., 0., 0., 1.]), ' ', array([ 0., 0., 0., 1.])), ('RPE5W24', ': ', array([ 1, 0, 0, 48]), ' ', array([ 0.02040816, 0. , 0. , 0.97959184]), ' ', array([ 0., 0., 0., 1.])), ('RPE5W27', ': ', array([ 0, 0, 0, 41]), ' ', array([ 0., 0., 0., 1.…	110010000	0.99426	0.439176	1	1
483	9	139070838	GGGxCAC	C	T	[('RPE5W22', ': ', array([ 0, 0, 44, 0]), ' ', array([ 0., 0., 1., 0.]), ' ', array([ 0., 0., 1., 0.])), ('RPE5W23', ': ', array([ 0, 0, 57, 0]), ' ', array([ 0., 0., 1., 0.]), ' ', array([ 0., 0., 1., 0.])), ('RPE5W24', ': ', array([ 0, 0, 58, 0]), ' ', array([ 0., 0., 1., 0.]), ' ', array([ 0., 0., 1., 0.])), ('RPE5W27', ': ', array([ 1, 0, 36, 1]), ' ', array([ 0.02631579, 0. , 0.94736842, 0.0…	111110000	0.978493	0.268405	0.999852	1
484	10	9972722	GATxTTT	G	T	[('RPE5W22', ': ', array([ 0, 0, 0, 42]), ' ', array([ 0., 0., 0., 1.]), ' ', array([ 0., 0., 0., 1.])), ('RPE5W23', ': ', array([ 0, 0, 0, 24]), ' ', array([ 0., 0., 0., 1.]), ' ', array([ 0., 0., 0., 1.])), ('RPE5W24', ': ', array([ 0, 0, 0, 22]), ' ', array([ 0., 0., 0., 1.]), ' ', array([ 0., 0., 0., 1.])), ('RPE5W27', ': ', array([ 0, 0, 0, 19]), ' ', array([ 0., 0., 0., 1.]), ' ', array([ 0…	110010000	0.994709	0.463752	0.999574	1
485	10	56412694	TCTxCCA	G	T	[('RPE5W22', ': ', array([ 0, 0, 0, 33]), ' ', array([ 0., 0., 0., 1.]), ' ', array([ 0., 0., 0., 1.])), ('RPE5W23', ': ', array([ 0, 0, 0, 26]), ' ', array([ 0., 0., 0., 1.]), ' ', array([ 0., 0., 0., 1.])), ('RPE5W24', ': ', array([ 0, 0, 0, 30]), ' ', array([ 0., 0., 0., 1.]), ' ', array([ 0., 0., 0., 1.])), ('RPE5W27', ': ', array([ 1, 0, 1, 22]), ' ', array([ 0.04166667, 0. , 0.04166667, 0.9…	110010000	0.975302	0.59692	0.999998	1
486	10	58172224	GAGxCTT	G	T	[('RPE5W22', ': ', array([ 0, 0, 0, 36]), ' ', array([ 0., 0., 0., 1.]), ' ', array([ 0., 0., 0., 1.])), ('RPE5W23', ': ', array([ 0, 0, 0, 24]), ' ', array([ 0., 0., 0., 1.]), ' ', array([ 0., 0., 0., 1.])), ('RPE5W24', ': ', array([ 0, 0, 0, 33]), ' ', array([ 0., 0., 0., 1.]), ' ', array([ 0., 0., 0., 1.])), ('RPE5W27', ': ', array([ 1, 0, 0, 29]), ' ', array([ 0.03333333, 0. , 0. , 0.96666667…	110010000	0.992023	0.453568	0.999385	1
487	10	83767507	TTTxAAA	T	G	[('RPE5W22', ': ', array([ 0, 64, 0, 0]), ' ', array([ 0., 1., 0., 0.]), ' ', array([ 0., 1., 0., 0.])), ('RPE5W23', ': ', array([ 0, 49, 0, 0]), ' ', array([ 0., 1., 0., 0.]), ' ', array([ 0., 1., 0., 0.])), ('RPE5W24', ': ', array([ 0, 53, 0, 0]), ' ', array([ 0., 1., 0., 0.]), ' ', array([ 0., 1., 0., 0.])), ('RPE5W27', ': ', array([ 0, 47, 0, 0]), ' ', array([ 0., 1., 0., 0.]), ' ', array([ 0…	110010000	0.994152	0.301459	0.999997	1
488	10	87489710	ACCxTCT	C	A	[('RPE5W22', ': ', array([ 0, 0, 51, 0]), ' ', array([ 0., 0., 1., 0.]), ' ', array([ 0., 0., 1., 0.])), ('RPE5W23', ': ', array([ 0, 0, 40, 0]), ' ', array([ 0., 0., 1., 0.]), ' ', array([ 0., 0., 1., 0.])), ('RPE5W24', ': ', array([ 0, 0, 52, 0]), ' ', array([ 0., 0., 1., 0.]), ' ', array([ 0., 0., 1., 0.])), ('RPE5W27', ': ', array([ 1, 0, 45, 0]), ' ', array([ 0.02173913, 0. , 0.97826087, 0. …	110010000	0.994875	0.280391	0.999999	1
489	10	107354951	GGTxATA	G	T	[('RPE5W22', ': ', array([ 0, 0, 0, 70]), ' ', array([ 0., 0., 0., 1.]), ' ', array([ 0., 0., 0., 1.])), ('RPE5W23', ': ', array([ 0, 0, 0, 49]), ' ', array([ 0., 0., 0., 1.]), ' ', array([ 0., 0., 0., 1.])), ('RPE5W24', ': ', array([ 0, 1, 0, 45]), ' ', array([ 0. , 0.02173913, 0. , 0.97826087]), ' ', array([ 0., 0., 0., 1.])), ('RPE5W27', ': ', array([ 0, 0, 0, 44]), ' ', array([ 0., 0., 0., 1.…	110010000	0.994112	0.233009	0.998176	1
490	10	108671788	AGCxTGA	G	A	[('RPE5W22', ': ', array([ 0, 0, 0, 58]), ' ', array([ 0., 0., 0., 1.]), ' ', array([ 0., 0., 0., 1.])), ('RPE5W23', ': ', array([ 1, 0, 0, 40]), ' ', array([ 0.02439024, 0. , 0. , 0.97560976]), ' ', array([ 0., 0., 0., 1.])), ('RPE5W24', ': ', array([ 0, 0, 0, 43]), ' ', array([ 0., 0., 0., 1.]), ' ', array([ 0., 0., 0., 1.])), ('RPE5W27', ': ', array([ 0, 0, 1, 51]), ' ', array([ 0. , 0. , 0.01…	110010000	0.997863	0.252271	0.999998	1
491	10	109876328	CAAxATT	A	G	[('RPE5W22', ': ', array([61, 0, 1, 0]), ' ', array([ 0.98387097, 0. , 0.01612903, 0. ]), ' ', array([ 1., 0., 0., 0.])), ('RPE5W23', ': ', array([47, 1, 0, 0]), ' ', array([ 0.97916667, 0.02083333, 0. , 0. ]), ' ', array([ 1., 0., 0., 0.])), ('RPE5W24', ': ', array([48, 0, 0, 0]), ' ', array([ 1., 0., 0., 0.]), ' ', array([ 1., 0., 0., 0.])), ('RPE5W27', ': ', array([42, 0, 1, 0]), ' ', array([ …	111110000	0.994374	0.245712	0.999996	1
492	11	17072712	GCTxCAA	G	A	[('RPE5W22', ': ', array([ 0, 0, 0, 69]), ' ', array([ 0., 0., 0., 1.]), ' ', array([ 0., 0., 0., 1.])), ('RPE5W23', ': ', array([ 0, 0, 0, 56]), ' ', array([ 0., 0., 0., 1.]), ' ', array([ 0., 0., 0., 1.])), ('RPE5W24', ': ', array([ 0, 1, 0, 60]), ' ', array([ 0. , 0.01639344, 0. , 0.98360656]), ' ', array([ 0., 0., 0., 1.])), ('RPE5W27', ': ', array([ 0, 0, 0, 55]), ' ', array([ 0., 0., 0., 1.…	110010000	0.992785	0.222047	0.9998	1
493	11	24992909	CCTxGCA	G	C	[('RPE5W22', ': ', array([ 0, 0, 0, 79]), ' ', array([ 0., 0., 0., 1.]), ' ', array([ 0., 0., 0., 1.])), ('RPE5W23', ': ', array([ 0, 0, 1, 52]), ' ', array([ 0. , 0. , 0.01886792, 0.98113208]), ' ', array([ 0., 0., 0., 1.])), ('RPE5W24', ': ', array([ 0, 0, 0, 49]), ' ', array([ 0., 0., 0., 1.]), ' ', array([ 0., 0., 0., 1.])), ('RPE5W27', ': ', array([ 0, 0, 1, 46]), ' ', array([ 0. , 0. , 0.02…	110010000	0.994164	0.213256	0.993957	1
494	11	29308411	TGAxATA	T	A	[('RPE5W22', ': ', array([ 0, 87, 0, 0]), ' ', array([ 0., 1., 0., 0.]), ' ', array([ 0., 1., 0., 0.])), ('RPE5W23', ': ', array([ 0, 49, 0, 0]), ' ', array([ 0., 1., 0., 0.]), ' ', array([ 0., 1., 0., 0.])), ('RPE5W24', ': ', array([ 0, 51, 0, 0]), ' ', array([ 0., 1., 0., 0.]), ' ', array([ 0., 1., 0., 0.])), ('RPE5W27', ': ', array([ 0, 32, 0, 0]), ' ', array([ 0., 1., 0., 0.]), ' ', array([ 0…	110010000	0.995394	0.245628	0.99998	1
495	11	34552480	GAAxAGC	G	T	[('RPE5W22', ': ', array([ 0, 0, 0, 66]), ' ', array([ 0., 0., 0., 1.]), ' ', array([ 0., 0., 0., 1.])), ('RPE5W23', ': ', array([ 0, 0, 0, 51]), ' ', array([ 0., 0., 0., 1.]), ' ', array([ 0., 0., 0., 1.])), ('RPE5W24', ': ', array([ 0, 0, 0, 56]), ' ', array([ 0., 0., 0., 1.]), ' ', array([ 0., 0., 0., 1.])), ('RPE5W27', ': ', array([ 1, 1, 0, 51]), ' ', array([ 0.01886792, 0.01886792, 0. , 0.9…	110010000	0.993443	0.216709	0.9996	1
496	11	41368244	CATxTTA	C	T	[('RPE5W22', ': ', array([ 0, 0, 53, 0]), ' ', array([ 0., 0., 1., 0.]), ' ', array([ 0., 0., 1., 0.])), ('RPE5W23', ': ', array([ 0, 1, 51, 0]), ' ', array([ 0. , 0.01923077, 0.98076923, 0. ]), ' ', array([ 0., 0., 1., 0.])), ('RPE5W24', ': ', array([ 1, 0, 61, 1]), ' ', array([ 0.01587302, 0. , 0.96825397, 0.01587302]), ' ', array([ 0., 0., 1., 0.])), ('RPE5W27', ': ', array([ 0, 0, 44, 0]), ' …	110010000	0.992236	0.267857	1	1
497	11	57779112	AGGxTTT	C	A	[('RPE5W22', ': ', array([ 0, 0, 75, 0]), ' ', array([ 0., 0., 1., 0.]), ' ', array([ 0., 0., 1., 0.])), ('RPE5W23', ': ', array([ 0, 0, 48, 0]), ' ', array([ 0., 0., 1., 0.]), ' ', array([ 0., 0., 1., 0.])), ('RPE5W24', ': ', array([ 0, 1, 47, 0]), ' ', array([ 0. , 0.02083333, 0.97916667, 0. ]), ' ', array([ 0., 0., 1., 0.])), ('RPE5W27', ': ', array([ 0, 0, 52, 0]), ' ', array([ 0., 0., 1., 0.…	110010000	0.990741	0.276876	0.999994	1
498	11	59881175	TTTxTTT	C	A	[('RPE5W22', ': ', array([ 0, 0, 71, 0]), ' ', array([ 0., 0., 1., 0.]), ' ', array([ 0., 0., 1., 0.])), ('RPE5W23', ': ', array([ 0, 0, 41, 1]), ' ', array([ 0. , 0. , 0.97619048, 0.02380952]), ' ', array([ 0., 0., 1., 0.])), ('RPE5W24', ': ', array([ 1, 0, 57, 0]), ' ', array([ 0.01724138, 0. , 0.98275862, 0. ]), ' ', array([ 0., 0., 1., 0.])), ('RPE5W27', ': ', array([ 0, 0, 40, 0]), ' ', arra…	110010000	0.996263	0.262005	0.999999	1
499	11	80375831	AGTxTCC	C	G	[('RPE5W22', ': ', array([ 1, 0, 62, 0]), ' ', array([ 0.01587302, 0. , 0.98412698, 0. ]), ' ', array([ 0., 0., 1., 0.])), ('RPE5W23', ': ', array([ 0, 1, 42, 0]), ' ', array([ 0. , 0.02325581, 0.97674419, 0. ]), ' ', array([ 0., 0., 1., 0.])), ('RPE5W24', ': ', array([ 0, 0, 50, 1]), ' ', array([ 0. , 0. , 0.98039216, 0.01960784]), ' ', array([ 0., 0., 1., 0.])), ('RPE5W27', ': ', array([ 0, 0, …	111110000	0.979223	0.299491	1	1
500	11	103380380	AATxCAT	G	A	[('RPE5W22', ': ', array([ 0, 0, 1, 87]), ' ', array([ 0. , 0. , 0.01136364, 0.98863636]), ' ', array([ 0., 0., 0., 1.])), ('RPE5W23', ': ', array([ 0, 0, 0, 57]), ' ', array([ 0., 0., 0., 1.]), ' ', array([ 0., 0., 0., 1.])), ('RPE5W24', ': ', array([ 1, 2, 0, 51]), ' ', array([ 0.01851852, 0.03703704, 0. , 0.94444444]), ' ', array([ 0., 0., 0., 1.])), ('RPE5W27', ': ', array([ 0, 0, 0, 54]), ' …	110010000	0.987935	0.23719	0.999996	1
501	11	120133588	GGTxGGC	T	A	[('RPE5W22', ': ', array([ 0, 79, 0, 0]), ' ', array([ 0., 1., 0., 0.]), ' ', array([ 0., 1., 0., 0.])), ('RPE5W23', ': ', array([ 0, 57, 0, 0]), ' ', array([ 0., 1., 0., 0.]), ' ', array([ 0., 1., 0., 0.])), ('RPE5W24', ': ', array([ 1, 55, 0, 0]), ' ', array([ 0.01785714, 0.98214286, 0. , 0. ]), ' ', array([ 0., 1., 0., 0.])), ('RPE5W27', ': ', array([ 0, 53, 0, 0]), ' ', array([ 0., 1., 0., 0.…	111110000	0.994648	0.24233	1	1
502	11	126862481	CCAxAGC	G	C	[('RPE5W22', ': ', array([ 0, 1, 0, 88]), ' ', array([ 0. , 0.01123596, 0. , 0.98876404]), ' ', array([ 0., 0., 0., 1.])), ('RPE5W23', ': ', array([ 0, 0, 0, 43]), ' ', array([ 0., 0., 0., 1.]), ' ', array([ 0., 0., 0., 1.])), ('RPE5W24', ': ', array([ 0, 0, 0, 42]), ' ', array([ 0., 0., 0., 1.]), ' ', array([ 0., 0., 0., 1.])), ('RPE5W27', ': ', array([ 0, 0, 0, 50]), ' ', array([ 0., 0., 0., 1.…	110010000	0.98582	0.380342	1	1
503	12	18603975	TAGxATT	G	T	[('RPE5W22', ': ', array([ 0, 0, 1, 64]), ' ', array([ 0. , 0. , 0.01538462, 0.98461538]), ' ', array([ 0., 0., 0., 1.])), ('RPE5W23', ': ', array([ 0, 0, 0, 56]), ' ', array([ 0., 0., 0., 1.]), ' ', array([ 0., 0., 0., 1.])), ('RPE5W24', ': ', array([ 0, 0, 1, 43]), ' ', array([ 0. , 0. , 0.02272727, 0.97727273]), ' ', array([ 0., 0., 0., 1.])), ('RPE5W27', ': ', array([ 0, 0, 0, 48]), ' ', arra…	110010000	0.987824	0.240773	0.999963	1
504	12	21962738	GTAxGAT	G	T	[('RPE5W22', ': ', array([ 1, 0, 0, 66]), ' ', array([ 0.01492537, 0. , 0. , 0.98507463]), ' ', array([ 0., 0., 0., 1.])), ('RPE5W23', ': ', array([ 0, 0, 0, 46]), ' ', array([ 0., 0., 0., 1.]), ' ', array([ 0., 0., 0., 1.])), ('RPE5W24', ': ', array([ 1, 1, 1, 56]), ' ', array([ 0.01694915, 0.01694915, 0.01694915, 0.94915254]), ' ', array([ 0., 0., 0., 1.])), ('RPE5W27', ': ', array([ 0, 0, 0, 5…	110010000	0.990223	0.316348	1	1
505	12	22472999	AGAxCTG	C	A	[('RPE5W22', ': ', array([ 0, 0, 72, 0]), ' ', array([ 0., 0., 1., 0.]), ' ', array([ 0., 0., 1., 0.])), ('RPE5W23', ': ', array([ 0, 0, 47, 0]), ' ', array([ 0., 0., 1., 0.]), ' ', array([ 0., 0., 1., 0.])), ('RPE5W24', ': ', array([ 1, 1, 70, 1]), ' ', array([ 0.01369863, 0.01369863, 0.95890411, 0.01369863]), ' ', array([ 0., 0., 1., 0.])), ('RPE5W27', ': ', array([ 1, 0, 44, 0]), ' ', array([ …	111110000	0.988309	0.249714	0.999999	1
506	12	62014896	AGGxCCC	C	A	[('RPE5W22', ': ', array([ 0, 0, 61, 0]), ' ', array([ 0., 0., 1., 0.]), ' ', array([ 0., 0., 1., 0.])), ('RPE5W23', ': ', array([ 0, 0, 45, 0]), ' ', array([ 0., 0., 1., 0.]), ' ', array([ 0., 0., 1., 0.])), ('RPE5W24', ': ', array([ 0, 0, 41, 0]), ' ', array([ 0., 0., 1., 0.]), ' ', array([ 0., 0., 1., 0.])), ('RPE5W27', ': ', array([ 0, 0, 41, 0]), ' ', array([ 0., 0., 1., 0.]), ' ', array([ 0…	110010000	0.988297	0.247814	0.999997	1
507	12	67165798	ACTxATG	T	C	[('RPE5W22', ': ', array([ 0, 84, 0, 0]), ' ', array([ 0., 1., 0., 0.]), ' ', array([ 0., 1., 0., 0.])), ('RPE5W23', ': ', array([ 0, 63, 0, 0]), ' ', array([ 0., 1., 0., 0.]), ' ', array([ 0., 1., 0., 0.])), ('RPE5W24', ': ', array([ 0, 63, 0, 0]), ' ', array([ 0., 1., 0., 0.]), ' ', array([ 0., 1., 0., 0.])), ('RPE5W27', ': ', array([ 0, 55, 0, 1]), ' ', array([ 0. , 0.98214286, 0. , 0.01785714…	110010000	0.992955	0.277137	1	1
508	12	86293141	TACxGAA	T	C	[('RPE5W22', ': ', array([ 0, 62, 0, 2]), ' ', array([ 0. , 0.96875, 0. , 0.03125]), ' ', array([ 0., 1., 0., 0.])), ('RPE5W23', ': ', array([ 0, 53, 0, 0]), ' ', array([ 0., 1., 0., 0.]), ' ', array([ 0., 1., 0., 0.])), ('RPE5W24', ': ', array([ 0, 59, 0, 1]), ' ', array([ 0. , 0.98333333, 0. , 0.01666667]), ' ', array([ 0., 1., 0., 0.])), ('RPE5W27', ': ', array([ 0, 49, 1, 0]), ' ', array([ 0.…	110010000	0.983439	0.259892	1	1
509	12	95240922	CCTxTCA	T	C	[('RPE5W22', ': ', array([ 1, 71, 0, 0]), ' ', array([ 0.01388889, 0.98611111, 0. , 0. ]), ' ', array([ 0., 1., 0., 0.])), ('RPE5W23', ': ', array([ 0, 50, 0, 1]), ' ', array([ 0. , 0.98039216, 0. , 0.01960784]), ' ', array([ 0., 1., 0., 0.])), ('RPE5W24', ': ', array([ 0, 45, 0, 0]), ' ', array([ 0., 1., 0., 0.]), ' ', array([ 0., 1., 0., 0.])), ('RPE5W27', ': ', array([ 1, 45, 0, 0]), ' ', arra…	110010000	0.993192	0.245775	0.999988	1
510	12	114628026	AGTxATT	G	A	[('RPE5W22', ': ', array([ 0, 0, 0, 74]), ' ', array([ 0., 0., 0., 1.]), ' ', array([ 0., 0., 0., 1.])), ('RPE5W23', ': ', array([ 0, 0, 0, 41]), ' ', array([ 0., 0., 0., 1.]), ' ', array([ 0., 0., 0., 1.])), ('RPE5W24', ': ', array([ 0, 0, 0, 38]), ' ', array([ 0., 0., 0., 1.]), ' ', array([ 0., 0., 0., 1.])), ('RPE5W27', ': ', array([ 0, 0, 0, 42]), ' ', array([ 0., 0., 0., 1.]), ' ', array([ 0…	111110000	0.991381	0.225023	0.999982	1
511	12	115142929	AAAxTGC	G	T	[('RPE5W22', ': ', array([ 0, 0, 1, 58]), ' ', array([ 0. , 0. , 0.01694915, 0.98305085]), ' ', array([ 0., 0., 0., 1.])), ('RPE5W23', ': ', array([ 0, 0, 0, 33]), ' ', array([ 0., 0., 0., 1.]), ' ', array([ 0., 0., 0., 1.])), ('RPE5W24', ': ', array([ 0, 0, 0, 41]), ' ', array([ 0., 0., 0., 1.]), ' ', array([ 0., 0., 0., 1.])), ('RPE5W27', ': ', array([ 0, 0, 0, 43]), ' ', array([ 0., 0., 0., 1.…	111110000	0.994883	0.19403	0.999403	1
512	12	118598335	ACTxTAC	C	A	[('RPE5W22', ': ', array([ 0, 0, 63, 0]), ' ', array([ 0., 0., 1., 0.]), ' ', array([ 0., 0., 1., 0.])), ('RPE5W23', ': ', array([ 0, 0, 53, 1]), ' ', array([ 0. , 0. , 0.98148148, 0.01851852]), ' ', array([ 0., 0., 1., 0.])), ('RPE5W24', ': ', array([ 0, 0, 51, 0]), ' ', array([ 0., 0., 1., 0.]), ' ', array([ 0., 0., 1., 0.])), ('RPE5W27', ': ', array([ 0, 0, 48, 0]), ' ', array([ 0., 0., 1., 0.…	110010000	0.997863	0.20958	0.999998	1
513	12	131760299	TCTxTAG	C	G	[('RPE5W22', ': ', array([ 0, 0, 63, 0]), ' ', array([ 0., 0., 1., 0.]), ' ', array([ 0., 0., 1., 0.])), ('RPE5W23', ': ', array([ 0, 0, 42, 0]), ' ', array([ 0., 0., 1., 0.]), ' ', array([ 0., 0., 1., 0.])), ('RPE5W24', ': ', array([ 0, 0, 64, 0]), ' ', array([ 0., 0., 1., 0.]), ' ', array([ 0., 0., 1., 0.])), ('RPE5W27', ': ', array([ 0, 0, 53, 0]), ' ', array([ 0., 0., 1., 0.]), ' ', array([ 0…	110010000	1	0.272848	1	1
514	13	22397865	CTGxAGA	A	G	[('RPE5W22', ': ', array([47, 0, 0, 1]), ' ', array([ 0.97916667, 0. , 0. , 0.02083333]), ' ', array([ 1., 0., 0., 0.])), ('RPE5W23', ': ', array([36, 0, 0, 0]), ' ', array([ 1., 0., 0., 0.]), ' ', array([ 1., 0., 0., 0.])), ('RPE5W24', ': ', array([36, 1, 0, 0]), ' ', array([ 0.97297297, 0.02702703, 0. , 0. ]), ' ', array([ 1., 0., 0., 0.])), ('RPE5W27', ': ', array([41, 0, 0, 0]), ' ', array([ …	110010000	0.989851	0.334904	0.999972	1
515	13	50198448	ATGxAGC	G	T	[('RPE5W22', ': ', array([ 0, 0, 0, 47]), ' ', array([ 0., 0., 0., 1.]), ' ', array([ 0., 0., 0., 1.])), ('RPE5W23', ': ', array([ 0, 0, 0, 39]), ' ', array([ 0., 0., 0., 1.]), ' ', array([ 0., 0., 0., 1.])), ('RPE5W24', ': ', array([ 0, 0, 0, 39]), ' ', array([ 0., 0., 0., 1.]), ' ', array([ 0., 0., 0., 1.])), ('RPE5W27', ': ', array([ 0, 0, 0, 38]), ' ', array([ 0., 0., 0., 1.]), ' ', array([ 0…	110010000	0.996528	0.254265	0.99991	1
516	13	54600753	GTTxGTG	G	A	[('RPE5W22', ': ', array([ 0, 0, 0, 60]), ' ', array([ 0., 0., 0., 1.]), ' ', array([ 0., 0., 0., 1.])), ('RPE5W23', ': ', array([ 0, 0, 1, 38]), ' ', array([ 0. , 0. , 0.02564103, 0.97435897]), ' ', array([ 0., 0., 0., 1.])), ('RPE5W24', ': ', array([ 1, 0, 0, 39]), ' ', array([ 0.025, 0. , 0. , 0.975]), ' ', array([ 0., 0., 0., 1.])), ('RPE5W27', ': ', array([ 0, 0, 0, 50]), ' ', array([ 0., 0.…	110010000	0.997222	0.395542	1	1
517	13	68246577	TTTxTAA	T	C	[('RPE5W22', ': ', array([ 0, 59, 1, 0]), ' ', array([ 0. , 0.98333333, 0.01666667, 0. ]), ' ', array([ 0., 1., 0., 0.])), ('RPE5W23', ': ', array([ 0, 30, 0, 0]), ' ', array([ 0., 1., 0., 0.]), ' ', array([ 0., 1., 0., 0.])), ('RPE5W24', ': ', array([ 0, 38, 0, 0]), ' ', array([ 0., 1., 0., 0.]), ' ', array([ 0., 1., 0., 0.])), ('RPE5W27', ': ', array([ 0, 31, 0, 0]), ' ', array([ 0., 1., 0., 0.…	110010000	0.995299	0.296126	0.996362	1
518	13	78607840	GAAxACA	G	T	[('RPE5W22', ': ', array([ 0, 0, 0, 48]), ' ', array([ 0., 0., 0., 1.]), ' ', array([ 0., 0., 0., 1.])), ('RPE5W23', ': ', array([ 0, 1, 0, 37]), ' ', array([ 0. , 0.02564103, 0. , 0.94871795]), ' ', array([ 0., 0., 0., 1.])), ('RPE5W24', ': ', array([ 0, 0, 0, 34]), ' ', array([ 0., 0., 0., 1.]), ' ', array([ 0., 0., 0., 1.])), ('RPE5W27', ': ', array([ 0, 0, 0, 27]), ' ', array([ 0., 0., 0., 1.…	111110000	0.995536	0.368022	0.999999	1
519	13	86228402	TATxGAG	G	T	[('RPE5W22', ': ', array([ 0, 1, 1, 67]), ' ', array([ 0. , 0.01449275, 0.01449275, 0.97101449]), ' ', array([ 0., 0., 0., 1.])), ('RPE5W23', ': ', array([ 0, 1, 0, 24]), ' ', array([ 0. , 0.04, 0. , 0.96]), ' ', array([ 0., 0., 0., 1.])), ('RPE5W24', ': ', array([ 0, 0, 0, 55]), ' ', array([ 0., 0., 0., 1.]), ' ', array([ 0., 0., 0., 1.])), ('RPE5W27', ': ', array([ 0, 0, 0, 38]), ' ', array([ 0…	110010000	0.993307	0.305585	0.998881	1
520	13	104060093	CCAxGCC	G	T	[('RPE5W22', ': ', array([ 0, 0, 0, 48]), ' ', array([ 0., 0., 0., 1.]), ' ', array([ 0., 0., 0., 1.])), ('RPE5W23', ': ', array([ 0, 0, 0, 39]), ' ', array([ 0., 0., 0., 1.]), ' ', array([ 0., 0., 0., 1.])), ('RPE5W24', ': ', array([ 0, 0, 0, 33]), ' ', array([ 0., 0., 0., 1.]), ' ', array([ 0., 0., 0., 1.])), ('RPE5W27', ': ', array([ 0, 0, 0, 29]), ' ', array([ 0., 0., 0., 1.]), ' ', array([ 0…	111110000	0.992481	0.336885	1	1
521	13	107027883	CGCxATG	C	A	[('RPE5W22', ': ', array([ 0, 0, 44, 0]), ' ', array([ 0., 0., 1., 0.]), ' ', array([ 0., 0., 1., 0.])), ('RPE5W23', ': ', array([ 0, 0, 49, 1]), ' ', array([ 0. , 0. , 0.98, 0.02]), ' ', array([ 0., 0., 1., 0.])), ('RPE5W24', ': ', array([ 0, 0, 38, 0]), ' ', array([ 0., 0., 1., 0.]), ' ', array([ 0., 0., 1., 0.])), ('RPE5W27', ': ', array([ 0, 0, 33, 0]), ' ', array([ 0., 0., 1., 0.]), ' ', arr…	110010000	0.997151	0.282917	0.999523	1
522	14	36710017	GACxCCA	G	T	[('RPE5W22', ': ', array([ 0, 0, 0, 59]), ' ', array([ 0., 0., 0., 1.]), ' ', array([ 0., 0., 0., 1.])), ('RPE5W23', ': ', array([ 0, 0, 0, 31]), ' ', array([ 0., 0., 0., 1.]), ' ', array([ 0., 0., 0., 1.])), ('RPE5W24', ': ', array([ 0, 1, 0, 31]), ' ', array([ 0. , 0.03125, 0. , 0.96875]), ' ', array([ 0., 0., 0., 1.])), ('RPE5W27', ': ', array([ 0, 0, 0, 27]), ' ', array([ 0., 0., 0., 1.]), ' …	110010000	0.996528	0.266332	0.999923	1
523	14	66932358	AATxCAT	G	T	[('RPE5W22', ': ', array([ 0, 0, 1, 33]), ' ', array([ 0. , 0. , 0.02941176, 0.97058824]), ' ', array([ 0., 0., 0., 1.])), ('RPE5W23', ': ', array([ 0, 0, 0, 34]), ' ', array([ 0., 0., 0., 1.]), ' ', array([ 0., 0., 0., 1.])), ('RPE5W24', ': ', array([ 0, 0, 0, 38]), ' ', array([ 0., 0., 0., 1.]), ' ', array([ 0., 0., 0., 1.])), ('RPE5W27', ': ', array([ 0, 0, 0, 43]), ' ', array([ 0., 0., 0., 1.…	111110000	0.992039	0.318483	1	1
524	14	80329929	CACxTAT	C	A	[('RPE5W22', ': ', array([ 0, 0, 62, 0]), ' ', array([ 0., 0., 1., 0.]), ' ', array([ 0., 0., 1., 0.])), ('RPE5W23', ': ', array([ 0, 1, 27, 0]), ' ', array([ 0. , 0.03571429, 0.96428571, 0. ]), ' ', array([ 0., 0., 1., 0.])), ('RPE5W24', ': ', array([ 0, 0, 45, 0]), ' ', array([ 0., 0., 1., 0.]), ' ', array([ 0., 0., 1., 0.])), ('RPE5W27', ': ', array([ 0, 0, 36, 0]), ' ', array([ 0., 0., 1., 0.…	111110000	1	0.38183	1	1
525	14	82361104	CACxTGG	C	G	[('RPE5W22', ': ', array([ 0, 0, 39, 0]), ' ', array([ 0., 0., 1., 0.]), ' ', array([ 0., 0., 1., 0.])), ('RPE5W23', ': ', array([ 0, 0, 36, 0]), ' ', array([ 0., 0., 1., 0.]), ' ', array([ 0., 0., 1., 0.])), ('RPE5W24', ': ', array([ 0, 0, 30, 0]), ' ', array([ 0., 0., 1., 0.]), ' ', array([ 0., 0., 1., 0.])), ('RPE5W27', ': ', array([ 0, 0, 29, 0]), ' ', array([ 0., 0., 1., 0.]), ' ', array([ 0…	111110000	0.994709	0.318068	0.999986	1
526	14	88845727	TTTxTTT	C	A	[('RPE5W22', ': ', array([ 0, 0, 52, 0]), ' ', array([ 0., 0., 1., 0.]), ' ', array([ 0., 0., 1., 0.])), ('RPE5W23', ': ', array([ 0, 1, 35, 0]), ' ', array([ 0. , 0.02777778, 0.97222222, 0. ]), ' ', array([ 0., 0., 1., 0.])), ('RPE5W24', ': ', array([ 0, 0, 34, 0]), ' ', array([ 0., 0., 1., 0.]), ' ', array([ 0., 0., 1., 0.])), ('RPE5W27', ': ', array([ 0, 0, 45, 0]), ' ', array([ 0., 0., 1., 0.…	110010000	0.997585	0.313438	0.999997	1
527	14	99102029	GAGxCAG	C	G	[('RPE5W22', ': ', array([ 0, 0, 52, 0]), ' ', array([ 0., 0., 1., 0.]), ' ', array([ 0., 0., 1., 0.])), ('RPE5W23', ': ', array([ 0, 0, 39, 0]), ' ', array([ 0., 0., 1., 0.]), ' ', array([ 0., 0., 1., 0.])), ('RPE5W24', ': ', array([ 0, 0, 43, 0]), ' ', array([ 0., 0., 1., 0.]), ' ', array([ 0., 0., 1., 0.])), ('RPE5W27', ': ', array([ 0, 0, 31, 0]), ' ', array([ 0., 0., 1., 0.]), ' ', array([ 0…	110010000	0.994048	0.359596	0.999999	1
528	15	25963282	AATxGGG	G	T	[('RPE5W22', ': ', array([ 0, 0, 0, 52]), ' ', array([ 0., 0., 0., 1.]), ' ', array([ 0., 0., 0., 1.])), ('RPE5W23', ': ', array([ 1, 0, 0, 39]), ' ', array([ 0.025, 0. , 0. , 0.975]), ' ', array([ 0., 0., 0., 1.])), ('RPE5W24', ': ', array([ 0, 0, 0, 47]), ' ', array([ 0., 0., 0., 1.]), ' ', array([ 0., 0., 0., 1.])), ('RPE5W27', ': ', array([ 0, 0, 0, 38]), ' ', array([ 0., 0., 0., 1.]), ' ', a…	111110000	1	0.32656	1	1
529	15	26803526	GGGxACA	C	A	[('RPE5W22', ': ', array([ 1, 0, 51, 1]), ' ', array([ 0.01886792, 0. , 0.96226415, 0.01886792]), ' ', array([ 0., 0., 1., 0.])), ('RPE5W23', ': ', array([ 0, 0, 38, 1]), ' ', array([ 0. , 0. , 0.97435897, 0.02564103]), ' ', array([ 0., 0., 1., 0.])), ('RPE5W24', ': ', array([ 0, 0, 36, 0]), ' ', array([ 0., 0., 1., 0.]), ' ', array([ 0., 0., 1., 0.])), ('RPE5W27', ': ', array([ 0, 0, 31, 0]), ' …	111110000	0.984328	0.416972	1	1
530	15	79255373	ACCxTGG	C	A	[('RPE5W22', ': ', array([ 0, 0, 55, 0]), ' ', array([ 0., 0., 1., 0.]), ' ', array([ 0., 0., 1., 0.])), ('RPE5W23', ': ', array([ 1, 0, 41, 0]), ' ', array([ 0.02380952, 0. , 0.97619048, 0. ]), ' ', array([ 0., 0., 1., 0.])), ('RPE5W24', ': ', array([ 0, 0, 32, 0]), ' ', array([ 0., 0., 1., 0.]), ' ', array([ 0., 0., 1., 0.])), ('RPE5W27', ': ', array([ 1, 0, 33, 0]), ' ', array([ 0.02941176, 0.…	110010000	0.991687	0.389446	1	1
531	15	85795934	CAGxTAG	G	T	[('RPE5W22', ': ', array([ 0, 0, 0, 47]), ' ', array([ 0., 0., 0., 1.]), ' ', array([ 0., 0., 0., 1.])), ('RPE5W23', ': ', array([ 1, 0, 0, 31]), ' ', array([ 0.03125, 0. , 0. , 0.96875]), ' ', array([ 0., 0., 0., 1.])), ('RPE5W24', ': ', array([ 0, 0, 0, 39]), ' ', array([ 0., 0., 0., 1.]), ' ', array([ 0., 0., 0., 1.])), ('RPE5W27', ': ', array([ 0, 0, 0, 52]), ' ', array([ 0., 0., 0., 1.]), ' …	110010000	1	0.372917	1	1
532	15	86550122	CTTxCTT	C	A	[('RPE5W22', ': ', array([ 0, 0, 49, 0]), ' ', array([ 0., 0., 1., 0.]), ' ', array([ 0., 0., 1., 0.])), ('RPE5W23', ': ', array([ 0, 1, 31, 0]), ' ', array([ 0. , 0.03125, 0.96875, 0. ]), ' ', array([ 0., 0., 1., 0.])), ('RPE5W24', ': ', array([ 0, 0, 34, 1]), ' ', array([ 0. , 0. , 0.97142857, 0.02857143]), ' ', array([ 0., 0., 1., 0.])), ('RPE5W27', ': ', array([ 0, 0, 34, 0]), ' ', array([ 0.…	110010000	0.996825	0.308405	0.999983	1
533	16	7689693	TGTxAGC	T	C	[('RPE5W22', ': ', array([ 0, 63, 0, 0]), ' ', array([ 0., 1., 0., 0.]), ' ', array([ 0., 1., 0., 0.])), ('RPE5W23', ': ', array([ 0, 46, 0, 0]), ' ', array([ 0., 1., 0., 0.]), ' ', array([ 0., 1., 0., 0.])), ('RPE5W24', ': ', array([ 0, 51, 0, 0]), ' ', array([ 0., 1., 0., 0.]), ' ', array([ 0., 1., 0., 0.])), ('RPE5W27', ': ', array([ 0, 39, 0, 0]), ' ', array([ 0., 1., 0., 0.]), ' ', array([ 0…	110010000	1	0.263068	0.999958	1
534	16	19159025	TAGxGTA	G	A	[('RPE5W22', ': ', array([ 0, 0, 0, 76]), ' ', array([ 0., 0., 0., 1.]), ' ', array([ 0., 0., 0., 1.])), ('RPE5W23', ': ', array([ 0, 0, 0, 60]), ' ', array([ 0., 0., 0., 1.]), ' ', array([ 0., 0., 0., 1.])), ('RPE5W24', ': ', array([ 0, 0, 0, 52]), ' ', array([ 0., 0., 0., 1.]), ' ', array([ 0., 0., 0., 1.])), ('RPE5W27', ': ', array([ 0, 0, 0, 45]), ' ', array([ 0., 0., 0., 1.]), ' ', array([ 0…	110010000	1	0.244369	0.999989	1
535	16	63744145	ATTxCAA	C	A	[('RPE5W22', ': ', array([ 0, 0, 93, 0]), ' ', array([ 0., 0., 1., 0.]), ' ', array([ 0., 0., 1., 0.])), ('RPE5W23', ': ', array([ 1, 0, 56, 0]), ' ', array([ 0.01754386, 0. , 0.98245614, 0. ]), ' ', array([ 0., 0., 1., 0.])), ('RPE5W24', ': ', array([ 0, 0, 55, 0]), ' ', array([ 0., 0., 1., 0.]), ' ', array([ 0., 0., 1., 0.])), ('RPE5W27', ': ', array([ 1, 0, 59, 0]), ' ', array([ 0.01666667, 0.…	110010000	0.995784	0.247427	1	1
536	16	66004157	GAAxATC	C	A	[('RPE5W22', ': ', array([ 0, 0, 81, 0]), ' ', array([ 0., 0., 1., 0.]), ' ', array([ 0., 0., 1., 0.])), ('RPE5W23', ': ', array([ 0, 0, 49, 0]), ' ', array([ 0., 0., 1., 0.]), ' ', array([ 0., 0., 1., 0.])), ('RPE5W24', ': ', array([ 0, 0, 46, 0]), ' ', array([ 0., 0., 1., 0.]), ' ', array([ 0., 0., 1., 0.])), ('RPE5W27', ': ', array([ 0, 0, 55, 0]), ' ', array([ 0., 0., 1., 0.]), ' ', array([ 0…	110010000	1	0.266923	0.999994	1
537	17	31908619	GGGxGTC	A	C	[('RPE5W22', ': ', array([40, 0, 0, 0]), ' ', array([ 1., 0., 0., 0.]), ' ', array([ 1., 0., 0., 0.])), ('RPE5W23', ': ', array([38, 0, 0, 1]), ' ', array([ 0.97435897, 0. , 0. , 0.02564103]), ' ', array([ 1., 0., 0., 0.])), ('RPE5W24', ': ', array([29, 1, 0, 1]), ' ', array([ 0.93548387, 0.03225806, 0. , 0.03225806]), ' ', array([ 1., 0., 0., 0.])), ('RPE5W27', ': ', array([33, 0, 0, 1]), ' ', a…	110010000	0.982929	0.352137	1	1
538	17	50221197	CACxGGG	T	A	[('RPE5W22', ': ', array([ 0, 45, 0, 1]), ' ', array([ 0. , 0.97826087, 0. , 0.02173913]), ' ', array([ 0., 1., 0., 0.])), ('RPE5W23', ': ', array([ 1, 36, 0, 0]), ' ', array([ 0.02702703, 0.97297297, 0. , 0. ]), ' ', array([ 0., 1., 0., 0.])), ('RPE5W24', ': ', array([ 0, 37, 0, 0]), ' ', array([ 0., 1., 0., 0.]), ' ', array([ 0., 1., 0., 0.])), ('RPE5W27', ': ', array([ 0, 28, 0, 0]), ' ', arra…	110010000	0.986359	0.394739	1	1
539	18	4965348	AGGxCAT	A	G	[('RPE5W22', ': ', array([36, 0, 0, 0]), ' ', array([ 1., 0., 0., 0.]), ' ', array([ 1., 0., 0., 0.])), ('RPE5W23', ': ', array([19, 0, 0, 0]), ' ', array([ 1., 0., 0., 0.]), ' ', array([ 1., 0., 0., 0.])), ('RPE5W24', ': ', array([21, 0, 0, 0]), ' ', array([ 1., 0., 0., 0.]), ' ', array([ 1., 0., 0., 0.])), ('RPE5W27', ': ', array([34, 0, 0, 0]), ' ', array([ 1., 0., 0., 0.]), ' ', array([ 1., 0…	110010000	1	0.371154	0.998635	1
540	18	65394844	CGAxGTC	G	T	[('RPE5W22', ': ', array([ 0, 0, 1, 31]), ' ', array([ 0. , 0. , 0.03125, 0.96875]), ' ', array([ 0., 0., 0., 1.])), ('RPE5W23', ': ', array([ 0, 0, 0, 23]), ' ', array([ 0., 0., 0., 1.]), ' ', array([ 0., 0., 0., 1.])), ('RPE5W24', ': ', array([ 0, 0, 0, 21]), ' ', array([ 0., 0., 0., 1.]), ' ', array([ 0., 0., 0., 1.])), ('RPE5W27', ': ', array([ 0, 0, 1, 16]), ' ', array([ 0. , 0. , 0.05882353…	110010000	0.985877	0.461111	0.999994	1
541	19	37159562	TAGxGGA	A	T	[('RPE5W22', ': ', array([49, 0, 0, 0]), ' ', array([ 1., 0., 0., 0.]), ' ', array([ 1., 0., 0., 0.])), ('RPE5W23', ': ', array([47, 0, 0, 0]), ' ', array([ 1., 0., 0., 0.]), ' ', array([ 1., 0., 0., 0.])), ('RPE5W24', ': ', array([36, 0, 0, 0]), ' ', array([ 1., 0., 0., 0.]), ' ', array([ 1., 0., 0., 0.])), ('RPE5W27', ': ', array([37, 0, 0, 0]), ' ', array([ 1., 0., 0., 0.]), ' ', array([ 1., 0…	111110000	0.995798	0.315424	1	1
542	20	7603721	TGAxCAA	G	C	[('RPE5W22', ': ', array([ 0, 0, 0, 78]), ' ', array([ 0., 0., 0., 1.]), ' ', array([ 0., 0., 0., 1.])), ('RPE5W23', ': ', array([ 0, 1, 0, 52]), ' ', array([ 0. , 0.01886792, 0. , 0.98113208]), ' ', array([ 0., 0., 0., 1.])), ('RPE5W24', ': ', array([ 0, 0, 0, 47]), ' ', array([ 0., 0., 0., 1.]), ' ', array([ 0., 0., 0., 1.])), ('RPE5W27', ': ', array([ 2, 0, 0, 64]), ' ', array([ 0.03030303, 0.…	111110000	0.995671	0.250198	1	1
543	21	26848831	TGGxACT	G	C	[('RPE5W22', ': ', array([ 0, 0, 0, 52]), ' ', array([ 0., 0., 0., 1.]), ' ', array([ 0., 0., 0., 1.])), ('RPE5W23', ': ', array([ 0, 0, 0, 45]), ' ', array([ 0., 0., 0., 1.]), ' ', array([ 0., 0., 0., 1.])), ('RPE5W24', ': ', array([ 0, 0, 0, 29]), ' ', array([ 0., 0., 0., 1.]), ' ', array([ 0., 0., 0., 1.])), ('RPE5W27', ': ', array([ 0, 0, 0, 23]), ' ', array([ 0., 0., 0., 1.]), ' ', array([ 0…	111110000	1	0.34932	0.999996	1
544	21	32107590	AGGxCTT	G	T	[('RPE5W22', ': ', array([ 0, 0, 0, 45]), ' ', array([ 0., 0., 0., 1.]), ' ', array([ 0., 0., 0., 1.])), ('RPE5W23', ': ', array([ 0, 0, 0, 35]), ' ', array([ 0., 0., 0., 1.]), ' ', array([ 0., 0., 0., 1.])), ('RPE5W24', ': ', array([ 0, 1, 0, 28]), ' ', array([ 0. , 0.03448276, 0. , 0.96551724]), ' ', array([ 0., 0., 0., 1.])), ('RPE5W27', ': ', array([ 0, 0, 0, 44]), ' ', array([ 0., 0., 0., 1.…	110010000	0.984771	0.298611	0.99992	1
545	22	17636287	CGCxAAC	C	T	[('RPE5W22', ': ', array([ 0, 0, 31, 0]), ' ', array([ 0., 0., 1., 0.]), ' ', array([ 0., 0., 1., 0.])), ('RPE5W23', ': ', array([ 0, 0, 19, 0]), ' ', array([ 0., 0., 1., 0.]), ' ', array([ 0., 0., 1., 0.])), ('RPE5W24', ': ', array([ 0, 0, 23, 0]), ' ', array([ 0., 0., 1., 0.]), ' ', array([ 0., 0., 1., 0.])), ('RPE5W27', ': ', array([ 0, 0, 34, 0]), ' ', array([ 0., 0., 1., 0.]), ' ', array([ 0…	110010000	0.993827	0.456238	0.999898	1
546	X	43109089	AATxCCC	A	G	[('RPE5W22', ': ', array([39, 0, 1, 0]), ' ', array([ 0.975, 0. , 0.025, 0. ]), ' ', array([ 1., 0., 0., 0.])), ('RPE5W23', ': ', array([47, 0, 0, 0]), ' ', array([ 1., 0., 0., 0.]), ' ', array([ 1., 0., 0., 0.])), ('RPE5W24', ': ', array([48, 0, 0, 0]), ' ', array([ 1., 0., 0., 0.]), ' ', array([ 1., 0., 0., 0.])), ('RPE5W27', ': ', array([27, 0, 0, 0]), ' ', array([ 1., 0., 0., 0.]), ' ', array…	110010000	0.992593	0.316802	0.999949	1
547	X	47176643	CAGxTTC	C	G	[('RPE5W22', ': ', array([ 0, 0, 54, 0]), ' ', array([ 0., 0., 1., 0.]), ' ', array([ 0., 0., 1., 0.])), ('RPE5W23', ': ', array([ 0, 0, 46, 0]), ' ', array([ 0., 0., 1., 0.]), ' ', array([ 0., 0., 1., 0.])), ('RPE5W24', ': ', array([ 0, 0, 43, 0]), ' ', array([ 0., 0., 1., 0.]), ' ', array([ 0., 0., 1., 0.])), ('RPE5W27', ': ', array([ 0, 0, 25, 0]), ' ', array([ 0., 0., 1., 0.]), ' ', array([ 0…	110010000	1	0.31478	0.999994	1
548	X	80721599	TCTxTGG	G	T	[('RPE5W22', ': ', array([ 0, 1, 0, 45]), ' ', array([ 0. , 0.02173913, 0. , 0.97826087]), ' ', array([ 0., 0., 0., 1.])), ('RPE5W23', ': ', array([ 0, 0, 0, 45]), ' ', array([ 0., 0., 0., 1.]), ' ', array([ 0., 0., 0., 1.])), ('RPE5W24', ': ', array([ 0, 0, 0, 36]), ' ', array([ 0., 0., 0., 1.]), ' ', array([ 0., 0., 0., 1.])), ('RPE5W27', ': ', array([ 0, 1, 0, 40]), ' ', array([ 0. , 0.0243902…	110010000	0.989513	0.321099	0.994969	1
549	X	86073872	TGGxAAA	A	G	[('RPE5W22', ': ', array([51, 0, 0, 0]), ' ', array([ 1., 0., 0., 0.]), ' ', array([ 1., 0., 0., 0.])), ('RPE5W23', ': ', array([38, 0, 1, 0]), ' ', array([ 0.97435897, 0. , 0.02564103, 0. ]), ' ', array([ 1., 0., 0., 0.])), ('RPE5W24', ': ', array([38, 0, 0, 0]), ' ', array([ 1., 0., 0., 0.]), ' ', array([ 1., 0., 0., 0.])), ('RPE5W27', ': ', array([32, 0, 0, 0]), ' ', array([ 1., 0., 0., 0.]), …	110010000	1	0.324463	0.999998	1
550	X	89228778	TCAxTAT	C	A	[('RPE5W22', ': ', array([ 1, 0, 56, 0]), ' ', array([ 0.01754386, 0. , 0.98245614, 0. ]), ' ', array([ 0., 0., 1., 0.])), ('RPE5W23', ': ', array([ 1, 0, 36, 0]), ' ', array([ 0.02702703, 0. , 0.97297297, 0. ]), ' ', array([ 0., 0., 1., 0.])), ('RPE5W24', ': ', array([ 1, 0, 27, 1]), ' ', array([ 0.03448276, 0. , 0.93103448, 0.03448276]), ' ', array([ 0., 0., 1., 0.])), ('RPE5W27', ': ', array([…	111110000	0.987642	0.300896	0.99971	1
551	X	89228780	ACTxTAG	A	C	[('RPE5W22', ': ', array([55, 0, 0, 0]), ' ', array([ 1., 0., 0., 0.]), ' ', array([ 1., 0., 0., 0.])), ('RPE5W23', ': ', array([37, 0, 0, 0]), ' ', array([ 1., 0., 0., 0.]), ' ', array([ 1., 0., 0., 0.])), ('RPE5W24', ': ', array([28, 0, 0, 1]), ' ', array([ 0.96551724, 0. , 0. , 0.03448276]), ' ', array([ 1., 0., 0., 0.])), ('RPE5W27', ': ', array([39, 0, 0, 0]), ' ', array([ 1., 0., 0., 0.]), …	111110000	0.985704	0.295825	0.99996	1
552	X	90419511	GGAxAAG	T	A	[('RPE5W22', ': ', array([ 0, 63, 0, 0]), ' ', array([ 0., 1., 0., 0.]), ' ', array([ 0., 1., 0., 0.])), ('RPE5W23', ': ', array([ 0, 32, 0, 0]), ' ', array([ 0., 1., 0., 0.]), ' ', array([ 0., 1., 0., 0.])), ('RPE5W24', ': ', array([ 0, 37, 0, 0]), ' ', array([ 0., 1., 0., 0.]), ' ', array([ 0., 1., 0., 0.])), ('RPE5W27', ': ', array([ 0, 38, 0, 0]), ' ', array([ 0., 1., 0., 0.]), ' ', array([ 0…	110010000	1	0.355089	0.999999	1
553	X	90419554	GTCxGTA	T	A	[('RPE5W22', ': ', array([ 0, 62, 0, 0]), ' ', array([ 0., 1., 0., 0.]), ' ', array([ 0., 1., 0., 0.])), ('RPE5W23', ': ', array([ 0, 27, 1, 0]), ' ', array([ 0. , 0.96428571, 0.03571429, 0. ]), ' ', array([ 0., 1., 0., 0.])), ('RPE5W24', ': ', array([ 0, 37, 1, 0]), ' ', array([ 0. , 0.97368421, 0.02631579, 0. ]), ' ', array([ 0., 1., 0., 0.])), ('RPE5W27', ': ', array([ 0, 28, 0, 0]), ' ', arra…	110010000	0.997076	0.318857	0.999997	1
554	X	93816092	ACTxTCC	C	G	[('RPE5W22', ': ', array([ 0, 0, 58, 0]), ' ', array([ 0., 0., 1., 0.]), ' ', array([ 0., 0., 1., 0.])), ('RPE5W23', ': ', array([ 0, 0, 41, 0]), ' ', array([ 0., 0., 1., 0.]), ' ', array([ 0., 0., 1., 0.])), ('RPE5W24', ': ', array([ 0, 0, 39, 0]), ' ', array([ 0., 0., 1., 0.]), ' ', array([ 0., 0., 1., 0.])), ('RPE5W27', ': ', array([ 0, 0, 32, 0]), ' ', array([ 0., 0., 1., 0.]), ' ', array([ 0…	110010000	1	0.275977	0.999983	1
555	X	124441937	TCTxTGC	C	A	[('RPE5W22', ': ', array([ 0, 0, 52, 1]), ' ', array([ 0. , 0. , 0.98113208, 0.01886792]), ' ', array([ 0., 0., 1., 0.])), ('RPE5W23', ': ', array([ 2, 0, 37, 0]), ' ', array([ 0.05128205, 0. , 0.94871795, 0. ]), ' ', array([ 0., 0., 1., 0.])), ('RPE5W24', ': ', array([ 0, 0, 33, 0]), ' ', array([ 0., 0., 1., 0.]), ' ', array([ 0., 0., 1., 0.])), ('RPE5W27', ': ', array([ 0, 1, 43, 0]), ' ', arra…	110010000	0.995378	0.321887	0.999999	1
556	X	128061434	GTTxTAA	T	C	[('RPE5W22', ': ', array([ 0, 39, 0, 0]), ' ', array([ 0., 1., 0., 0.]), ' ', array([ 0., 1., 0., 0.])), ('RPE5W23', ': ', array([ 0, 28, 0, 0]), ' ', array([ 0., 1., 0., 0.]), ' ', array([ 0., 1., 0., 0.])), ('RPE5W24', ': ', array([ 0, 44, 0, 0]), ' ', array([ 0., 1., 0., 0.]), ' ', array([ 0., 1., 0., 0.])), ('RPE5W27', ': ', array([ 0, 38, 0, 0]), ' ', array([ 0., 1., 0., 0.]), ' ', array([ 0…	110010000	0.988166	0.366272	0.999995	1
557	X	131594290	ATGxAAA	A	G	[('RPE5W22', ': ', array([58, 0, 1, 0]), ' ', array([ 0.98305085, 0. , 0.01694915, 0. ]), ' ', array([ 1., 0., 0., 0.])), ('RPE5W23', ': ', array([32, 0, 0, 0]), ' ', array([ 1., 0., 0., 0.]), ' ', array([ 1., 0., 0., 0.])), ('RPE5W24', ': ', array([50, 1, 0, 0]), ' ', array([ 0.98039216, 0.01960784, 0. , 0. ]), ' ', array([ 1., 0., 0., 0.])), ('RPE5W27', ': ', array([45, 1, 0, 0]), ' ', array([ …	110010000	0.990813	0.354238	0.999999	1
558	X	133320882	CCTxGGG	G	A	[('RPE5W22', ': ', array([ 0, 0, 0, 54]), ' ', array([ 0., 0., 0., 1.]), ' ', array([ 0., 0., 0., 1.])), ('RPE5W23', ': ', array([ 0, 0, 0, 34]), ' ', array([ 0., 0., 0., 1.]), ' ', array([ 0., 0., 0., 1.])), ('RPE5W24', ': ', array([ 0, 0, 0, 31]), ' ', array([ 0., 0., 0., 1.]), ' ', array([ 0., 0., 0., 1.])), ('RPE5W27', ': ', array([ 0, 0, 0, 25]), ' ', array([ 0., 0., 0., 1.]), ' ', array([ 0…	110010000	0.997354	0.35098	1	1
559	X	144688855	TAAxATT	T	G	[('RPE5W22', ': ', array([ 1, 72, 0, 0]), ' ', array([ 0.01369863, 0.98630137, 0. , 0. ]), ' ', array([ 0., 1., 0., 0.])), ('RPE5W23', ': ', array([ 1, 39, 0, 0]), ' ', array([ 0.025, 0.975, 0. , 0. ]), ' ', array([ 0., 1., 0., 0.])), ('RPE5W24', ': ', array([ 0, 40, 0, 0]), ' ', array([ 0., 1., 0., 0.]), ' ', array([ 0., 1., 0., 0.])), ('RPE5W27', ': ', array([ 1, 43, 0, 0]), ' ', array([ 0.0227…	110010000	0.995953	0.2953	0.99516	1
560	1	29765354	CATxCTG	T	A	[('RPE5W22', ': ', array([ 0, 45, 0, 0]), ' ', array([ 0., 1., 0., 0.]), ' ', array([ 0., 1., 0., 0.])), ('RPE5W23', ': ', array([ 0, 42, 0, 0]), ' ', array([ 0., 1., 0., 0.]), ' ', array([ 0., 1., 0., 0.])), ('RPE5W24', ': ', array([ 0, 30, 0, 0]), ' ', array([ 0., 1., 0., 0.]), ' ', array([ 0., 1., 0., 0.])), ('RPE5W27', ': ', array([ 0, 35, 0, 0]), ' ', array([ 0., 1., 0., 0.]), ' ', array([ 0…	10010000	0.988914	0.271341	0.999923	1
561	1	99504479	ATTxTTA	G	T	[('RPE5W22', ': ', array([ 0, 0, 0, 56]), ' ', array([ 0., 0., 0., 1.]), ' ', array([ 0., 0., 0., 1.])), ('RPE5W23', ': ', array([ 1, 0, 0, 33]), ' ', array([ 0.02941176, 0. , 0. , 0.97058824]), ' ', array([ 0., 0., 0., 1.])), ('RPE5W24', ': ', array([ 0, 0, 0, 38]), ' ', array([ 0., 0., 0., 1.]), ' ', array([ 0., 0., 0., 1.])), ('RPE5W27', ': ', array([ 0, 0, 0, 38]), ' ', array([ 0., 0., 0., 1.…	10010000	0.997143	0.286794	0.999969	1
562	1	108748948	TTTxTAG	T	C	[('RPE5W22', ': ', array([ 0, 48, 0, 0]), ' ', array([ 0. , 0.97959184, 0. , 0. ]), ' ', array([ 0., 1., 0., 0.])), ('RPE5W23', ': ', array([ 0, 46, 0, 0]), ' ', array([ 0., 1., 0., 0.]), ' ', array([ 0., 1., 0., 0.])), ('RPE5W24', ': ', array([ 0, 34, 0, 0]), ' ', array([ 0., 1., 0., 0.]), ' ', array([ 0., 1., 0., 0.])), ('RPE5W27', ': ', array([ 0, 37, 0, 1]), ' ', array([ 0. , 0.97368421, 0. ,…	10010000	0.989102	0.350174	1	1
563	1	151350899	TAAxCAT	C	T	[('RPE5W22', ': ', array([ 0, 0, 63, 0]), ' ', array([ 0., 0., 1., 0.]), ' ', array([ 0., 0., 1., 0.])), ('RPE5W23', ': ', array([ 0, 0, 53, 0]), ' ', array([ 0., 0., 1., 0.]), ' ', array([ 0., 0., 1., 0.])), ('RPE5W24', ': ', array([ 0, 0, 45, 0]), ' ', array([ 0., 0., 1., 0.]), ' ', array([ 0., 0., 1., 0.])), ('RPE5W27', ': ', array([ 0, 0, 43, 0]), ' ', array([ 0., 0., 1., 0.]), ' ', array([ 0…	10010000	0.986973	0.364003	1	1
564	1	179637374	CTGxCCT	G	C	[('RPE5W22', ': ', array([ 1, 0, 0, 50]), ' ', array([ 0.01960784, 0. , 0. , 0.98039216]), ' ', array([ 0., 0., 0., 1.])), ('RPE5W23', ': ', array([ 0, 0, 0, 34]), ' ', array([ 0., 0., 0., 1.]), ' ', array([ 0., 0., 0., 1.])), ('RPE5W24', ': ', array([ 0, 0, 0, 46]), ' ', array([ 0., 0., 0., 1.]), ' ', array([ 0., 0., 0., 1.])), ('RPE5W27', ': ', array([ 0, 0, 0, 38]), ' ', array([ 0., 0., 0., 1.…	10010000	0.982609	0.299091	0.999978	1
565	1	246196574	ATTxTCC	A	G	[('RPE5W22', ': ', array([53, 0, 0, 0]), ' ', array([ 1., 0., 0., 0.]), ' ', array([ 1., 0., 0., 0.])), ('RPE5W23', ': ', array([38, 1, 0, 0]), ' ', array([ 0.97435897, 0.02564103, 0. , 0. ]), ' ', array([ 1., 0., 0., 0.])), ('RPE5W24', ': ', array([47, 0, 2, 0]), ' ', array([ 0.95918367, 0. , 0.04081633, 0. ]), ' ', array([ 1., 0., 0., 0.])), ('RPE5W27', ': ', array([35, 0, 0, 0]), ' ', array([ …	10010000	0.976771	0.326863	0.999682	1
566	2	2831985	CATxAGG	G	T	[('RPE5W22', ': ', array([ 0, 0, 0, 45]), ' ', array([ 0., 0., 0., 1.]), ' ', array([ 0., 0., 0., 1.])), ('RPE5W23', ': ', array([ 0, 0, 0, 23]), ' ', array([ 0., 0., 0., 1.]), ' ', array([ 0., 0., 0., 1.])), ('RPE5W24', ': ', array([ 0, 0, 0, 49]), ' ', array([ 0., 0., 0., 1.]), ' ', array([ 0., 0., 0., 1.])), ('RPE5W27', ': ', array([ 0, 1, 0, 27]), ' ', array([ 0. , 0.03571429, 0. , 0.96428571…	10010000	0.993797	0.27027	0.999402	1
567	2	41420356	CGAxAGT	T	C	[('RPE5W22', ': ', array([ 0, 41, 0, 0]), ' ', array([ 0., 1., 0., 0.]), ' ', array([ 0., 1., 0., 0.])), ('RPE5W23', ': ', array([ 0, 34, 1, 0]), ' ', array([ 0. , 0.97142857, 0.02857143, 0. ]), ' ', array([ 0., 1., 0., 0.])), ('RPE5W24', ': ', array([ 0, 15, 0, 0]), ' ', array([ 0., 1., 0., 0.]), ' ', array([ 0., 1., 0., 0.])), ('RPE5W27', ': ', array([ 0, 32, 0, 0]), ' ', array([ 0., 1., 0., 0.…	10010000	1	0.318889	0.995541	1
568	2	51535156	CAAxGCA	G	A	[('RPE5W22', ': ', array([ 0, 0, 0, 56]), ' ', array([ 0., 0., 0., 1.]), ' ', array([ 0., 0., 0., 1.])), ('RPE5W23', ': ', array([ 1, 1, 0, 39]), ' ', array([ 0.02439024, 0.02439024, 0. , 0.95121951]), ' ', array([ 0., 0., 0., 1.])), ('RPE5W24', ': ', array([ 0, 0, 0, 48]), ' ', array([ 0., 0., 0., 1.]), ' ', array([ 0., 0., 0., 1.])), ('RPE5W27', ': ', array([ 0, 1, 0, 38]), ' ', array([ 0. , 0.…	10010000	0.997436	0.395652	0.999979	1
569	2	76755524	TTAxAAC	A	G	[('RPE5W22', ': ', array([52, 0, 0, 0]), ' ', array([ 1., 0., 0., 0.]), ' ', array([ 1., 0., 0., 0.])), ('RPE5W23', ': ', array([27, 0, 0, 0]), ' ', array([ 1., 0., 0., 0.]), ' ', array([ 1., 0., 0., 0.])), ('RPE5W24', ': ', array([34, 0, 0, 0]), ' ', array([ 1., 0., 0., 0.]), ' ', array([ 1., 0., 0., 0.])), ('RPE5W27', ': ', array([32, 0, 0, 0]), ' ', array([ 1., 0., 0., 0.]), ' ', array([ 1., 0…	10010000	0.997143	0.342857	0.999998	1
570	2	79453923	ATTxTAG	C	T	[('RPE5W22', ': ', array([ 0, 0, 31, 0]), ' ', array([ 0., 0., 1., 0.]), ' ', array([ 0., 0., 1., 0.])), ('RPE5W23', ': ', array([ 0, 0, 29, 0]), ' ', array([ 0., 0., 1., 0.]), ' ', array([ 0., 0., 1., 0.])), ('RPE5W24', ': ', array([ 0, 0, 38, 0]), ' ', array([ 0., 0., 1., 0.]), ' ', array([ 0., 0., 1., 0.])), ('RPE5W27', ': ', array([ 0, 0, 24, 0]), ' ', array([ 0., 0., 1., 0.]), ' ', array([ 0…	10010000	0.991111	0.309211	0.999995	1
571	2	108424892	CACxATC	G	C	[('RPE5W22', ': ', array([ 0, 0, 0, 53]), ' ', array([ 0., 0., 0., 1.]), ' ', array([ 0., 0., 0., 1.])), ('RPE5W23', ': ', array([ 0, 0, 0, 38]), ' ', array([ 0., 0., 0., 1.]), ' ', array([ 0., 0., 0., 1.])), ('RPE5W24', ': ', array([ 0, 0, 0, 44]), ' ', array([ 0., 0., 0., 1.]), ' ', array([ 0., 0., 0., 1.])), ('RPE5W27', ': ', array([ 0, 1, 0, 43]), ' ', array([ 0. , 0.02272727, 0. , 0.97727273…	10010000	0.994949	0.337101	0.999999	1
572	2	155824434	ACTxCAT	G	A	[('RPE5W22', ': ', array([ 0, 0, 0, 64]), ' ', array([ 0., 0., 0., 1.]), ' ', array([ 0., 0., 0., 1.])), ('RPE5W23', ': ', array([ 0, 0, 0, 35]), ' ', array([ 0., 0., 0., 1.]), ' ', array([ 0., 0., 0., 1.])), ('RPE5W24', ': ', array([ 0, 0, 0, 40]), ' ', array([ 0., 0., 0., 1.]), ' ', array([ 0., 0., 0., 1.])), ('RPE5W27', ': ', array([ 0, 0, 0, 43]), ' ', array([ 0., 0., 0., 1.]), ' ', array([ 0…	10010000	0.993095	0.276471	0.999935	1
573	2	221714367	AGTxTAA	C	G	[('RPE5W22', ': ', array([ 1, 0, 49, 0]), ' ', array([ 0.02, 0. , 0.98, 0. ]), ' ', array([ 0., 0., 1., 0.])), ('RPE5W23', ': ', array([ 0, 0, 39, 0]), ' ', array([ 0., 0., 1., 0.]), ' ', array([ 0., 0., 1., 0.])), ('RPE5W24', ': ', array([ 0, 0, 41, 0]), ' ', array([ 0., 0., 1., 0.]), ' ', array([ 0., 0., 1., 0.])), ('RPE5W27', ': ', array([ 0, 0, 31, 0]), ' ', array([ 0., 0., 1., 0.]), ' ', arr…	10010000	0.982309	0.290476	0.999978	1
574	3	43875090	TTTxTTT	T	C	[('RPE5W22', ': ', array([ 0, 41, 0, 0]), ' ', array([ 0., 1., 0., 0.]), ' ', array([ 0., 1., 0., 0.])), ('RPE5W23', ': ', array([ 0, 39, 0, 0]), ' ', array([ 0., 1., 0., 0.]), ' ', array([ 0., 1., 0., 0.])), ('RPE5W24', ': ', array([ 0, 34, 0, 0]), ' ', array([ 0., 1., 0., 0.]), ' ', array([ 0., 1., 0., 0.])), ('RPE5W27', ': ', array([ 0, 38, 0, 0]), ' ', array([ 0., 1., 0., 0.]), ' ', array([ 0…	10010000	0.997368	0.334615	0.999996	1
575	3	79515568	GATxGTC	T	G	[('RPE5W22', ': ', array([ 0, 51, 0, 0]), ' ', array([ 0., 1., 0., 0.]), ' ', array([ 0., 1., 0., 0.])), ('RPE5W23', ': ', array([ 0, 37, 0, 0]), ' ', array([ 0., 1., 0., 0.]), ' ', array([ 0., 1., 0., 0.])), ('RPE5W24', ': ', array([ 0, 53, 0, 0]), ' ', array([ 0., 1., 0., 0.]), ' ', array([ 0., 1., 0., 0.])), ('RPE5W27', ': ', array([ 0, 32, 0, 0]), ' ', array([ 0., 1., 0., 0.]), ' ', array([ 0…	10010000	0.991368	0.271062	0.999825	1
576	3	106273895	CAAxTGC	C	G	[('RPE5W22', ': ', array([ 0, 0, 72, 0]), ' ', array([ 0., 0., 1., 0.]), ' ', array([ 0., 0., 1., 0.])), ('RPE5W23', ': ', array([ 0, 0, 35, 0]), ' ', array([ 0., 0., 1., 0.]), ' ', array([ 0., 0., 1., 0.])), ('RPE5W24', ': ', array([ 1, 0, 41, 0]), ' ', array([ 0.02380952, 0. , 0.97619048, 0. ]), ' ', array([ 0., 0., 1., 0.])), ('RPE5W27', ': ', array([ 0, 0, 46, 0]), ' ', array([ 0., 0., 1., 0.…	10010000	0.992423	0.360268	1	1
577	3	149835459	TCAxTTT	T	G	[('RPE5W22', ': ', array([ 0, 57, 0, 1]), ' ', array([ 0. , 0.98275862, 0. , 0.01724138]), ' ', array([ 0., 1., 0., 0.])), ('RPE5W23', ': ', array([ 0, 39, 0, 0]), ' ', array([ 0., 1., 0., 0.]), ' ', array([ 0., 1., 0., 0.])), ('RPE5W24', ': ', array([ 0, 26, 0, 0]), ' ', array([ 0., 1., 0., 0.]), ' ', array([ 0., 1., 0., 0.])), ('RPE5W27', ': ', array([ 0, 38, 0, 0]), ' ', array([ 0., 1., 0., 0.…	10010000	0.984418	0.319775	0.999998	1
578	3	178617501	CCTxACC	G	T	[('RPE5W22', ': ', array([ 0, 0, 0, 47]), ' ', array([ 0., 0., 0., 1.]), ' ', array([ 0., 0., 0., 1.])), ('RPE5W23', ': ', array([ 1, 0, 0, 33]), ' ', array([ 0.02941176, 0. , 0. , 0.97058824]), ' ', array([ 0., 0., 0., 1.])), ('RPE5W24', ': ', array([ 0, 0, 0, 25]), ' ', array([ 0., 0., 0., 1.]), ' ', array([ 0., 0., 0., 1.])), ('RPE5W27', ': ', array([ 0, 0, 0, 37]), ' ', array([ 0., 0., 0., 1.…	10010000	1	0.345098	0.999999	1
579	4	63769271	ATTxTTT	C	A	[('RPE5W22', ': ', array([ 1, 0, 50, 0]), ' ', array([ 0.01960784, 0. , 0.98039216, 0. ]), ' ', array([ 0., 0., 1., 0.])), ('RPE5W23', ': ', array([ 0, 0, 43, 0]), ' ', array([ 0., 0., 1., 0.]), ' ', array([ 0., 0., 1., 0.])), ('RPE5W24', ': ', array([ 0, 0, 55, 0]), ' ', array([ 0., 0., 1., 0.]), ' ', array([ 0., 0., 1., 0.])), ('RPE5W27', ': ', array([ 0, 1, 57, 0]), ' ', array([ 0. , 0.0172413…	10010000	0.991523	0.383484	1	1
580	4	64881108	ACAxCTT	C	A	[('RPE5W22', ': ', array([ 0, 0, 49, 0]), ' ', array([ 0., 0., 1., 0.]), ' ', array([ 0., 0., 1., 0.])), ('RPE5W23', ': ', array([ 0, 0, 50, 0]), ' ', array([ 0., 0., 1., 0.]), ' ', array([ 0., 0., 1., 0.])), ('RPE5W24', ': ', array([ 0, 0, 39, 0]), ' ', array([ 0., 0., 1., 0.]), ' ', array([ 0., 0., 1., 0.])), ('RPE5W27', ': ', array([ 0, 0, 44, 0]), ' ', array([ 0., 0., 1., 0.]), ' ', array([ 0…	10010000	1	0.338629	0.999999	1
581	4	65662495	GGTxATT	C	T	[('RPE5W22', ': ', array([ 0, 0, 58, 0]), ' ', array([ 0., 0., 1., 0.]), ' ', array([ 0., 0., 1., 0.])), ('RPE5W23', ': ', array([ 0, 0, 49, 0]), ' ', array([ 0., 0., 1., 0.]), ' ', array([ 0., 0., 1., 0.])), ('RPE5W24', ': ', array([ 0, 0, 29, 0]), ' ', array([ 0., 0., 1., 0.]), ' ', array([ 0., 0., 1., 0.])), ('RPE5W27', ': ', array([ 0, 0, 37, 0]), ' ', array([ 0., 0., 1., 0.]), ' ', array([ 0…	10010000	0.99697	0.332981	0.999996	1
582	5	11674899	GGTxCAA	G	A	[('RPE5W22', ': ', array([ 0, 0, 0, 65]), ' ', array([ 0., 0., 0., 1.]), ' ', array([ 0., 0., 0., 1.])), ('RPE5W23', ': ', array([ 0, 0, 0, 54]), ' ', array([ 0., 0., 0., 1.]), ' ', array([ 0., 0., 0., 1.])), ('RPE5W24', ': ', array([ 0, 0, 0, 53]), ' ', array([ 0., 0., 0., 1.]), ' ', array([ 0., 0., 0., 1.])), ('RPE5W27', ': ', array([ 0, 0, 0, 50]), ' ', array([ 0., 0., 0., 1.]), ' ', array([ 0…	10010000	1	0.254604	0.999975	1
583	5	28683784	TGGxTGT	G	C	[('RPE5W22', ': ', array([ 0, 0, 1, 60]), ' ', array([ 0. , 0. , 0.01639344, 0.98360656]), ' ', array([ 0., 0., 0., 1.])), ('RPE5W23', ': ', array([ 1, 0, 0, 49]), ' ', array([ 0.02, 0. , 0. , 0.98]), ' ', array([ 0., 0., 0., 1.])), ('RPE5W24', ': ', array([ 0, 0, 0, 53]), ' ', array([ 0., 0., 0., 1.]), ' ', array([ 0., 0., 0., 1.])), ('RPE5W27', ': ', array([ 0, 0, 0, 48]), ' ', array([ 0., 0., …	10010000	0.996088	0.221951	0.999999	1
584	5	103704078	TTTxGCA	G	T	[('RPE5W22', ': ', array([ 0, 0, 0, 67]), ' ', array([ 0., 0., 0., 1.]), ' ', array([ 0., 0., 0., 1.])), ('RPE5W23', ': ', array([ 0, 0, 1, 57]), ' ', array([ 0. , 0. , 0.01724138, 0.98275862]), ' ', array([ 0., 0., 0., 1.])), ('RPE5W24', ': ', array([ 0, 0, 0, 50]), ' ', array([ 0., 0., 0., 1.]), ' ', array([ 0., 0., 0., 1.])), ('RPE5W27', ': ', array([ 0, 0, 0, 43]), ' ', array([ 0., 0., 0., 1.…	10010000	0.993508	0.248157	0.999998	1
585	5	103704079	TTGxCAC	G	T	[('RPE5W22', ': ', array([ 0, 0, 0, 66]), ' ', array([ 0., 0., 0., 1.]), ' ', array([ 0., 0., 0., 1.])), ('RPE5W23', ': ', array([ 0, 0, 1, 58]), ' ', array([ 0. , 0. , 0.01694915, 0.98305085]), ' ', array([ 0., 0., 0., 1.])), ('RPE5W24', ': ', array([ 0, 0, 0, 50]), ' ', array([ 0., 0., 0., 1.]), ' ', array([ 0., 0., 0., 1.])), ('RPE5W27', ': ', array([ 0, 0, 0, 43]), ' ', array([ 0., 0., 0., 1.…	10010000	0.988216	0.268016	1	1
586	5	128383761	CTGxTGA	C	T	[('RPE5W22', ': ', array([ 0, 0, 76, 0]), ' ', array([ 0., 0., 1., 0.]), ' ', array([ 0., 0., 1., 0.])), ('RPE5W23', ': ', array([ 1, 0, 60, 0]), ' ', array([ 0.01639344, 0. , 0.98360656, 0. ]), ' ', array([ 0., 0., 1., 0.])), ('RPE5W24', ': ', array([ 0, 0, 57, 1]), ' ', array([ 0. , 0. , 0.98275862, 0.01724138]), ' ', array([ 0., 0., 1., 0.])), ('RPE5W27', ': ', array([ 1, 0, 59, 0]), ' ', arra…	110010000	0.991399	0.212814	0.999998	1
587	5	128976736	CAAxTGT	T	G	[('RPE5W22', ': ', array([ 0, 79, 0, 0]), ' ', array([ 0., 1., 0., 0.]), ' ', array([ 0., 1., 0., 0.])), ('RPE5W23', ': ', array([ 0, 56, 0, 0]), ' ', array([ 0., 1., 0., 0.]), ' ', array([ 0., 1., 0., 0.])), ('RPE5W24', ': ', array([ 0, 50, 0, 0]), ' ', array([ 0., 1., 0., 0.]), ' ', array([ 0., 1., 0., 0.])), ('RPE5W27', ': ', array([ 0, 39, 0, 0]), ' ', array([ 0. , 0.975, 0. , 0. ]), ' ', arr…	10010000	1	0.183673	0.999922	1
588	5	176177684	TATxATG	C	A	[('RPE5W22', ': ', array([ 0, 0, 66, 0]), ' ', array([ 0., 0., 1., 0.]), ' ', array([ 0., 0., 1., 0.])), ('RPE5W23', ': ', array([ 0, 0, 41, 1]), ' ', array([ 0. , 0. , 0.97619048, 0.02380952]), ' ', array([ 0., 0., 1., 0.])), ('RPE5W24', ': ', array([ 0, 0, 53, 0]), ' ', array([ 0., 0., 1., 0.]), ' ', array([ 0., 0., 1., 0.])), ('RPE5W27', ': ', array([ 0, 0, 57, 1]), ' ', array([ 0. , 0. , 0.98…	10010000	0.991125	0.215701	0.99996	1
589	6	30093319	TTAxCCT	T	G	[('RPE5W22', ': ', array([ 0, 68, 0, 0]), ' ', array([ 0., 1., 0., 0.]), ' ', array([ 0., 1., 0., 0.])), ('RPE5W23', ': ', array([ 0, 28, 0, 1]), ' ', array([ 0. , 0.96551724, 0. , 0.03448276]), ' ', array([ 0., 1., 0., 0.])), ('RPE5W24', ': ', array([ 0, 31, 0, 0]), ' ', array([ 0., 1., 0., 0.]), ' ', array([ 0., 1., 0., 0.])), ('RPE5W27', ': ', array([ 0, 31, 0, 0]), ' ', array([ 0., 1., 0., 0.…	10010000	0.984438	0.345	0.999997	1
590	6	41226755	CTTxCCC	T	C	[('RPE5W22', ': ', array([ 0, 54, 0, 0]), ' ', array([ 0., 1., 0., 0.]), ' ', array([ 0., 1., 0., 0.])), ('RPE5W23', ': ', array([ 0, 30, 0, 0]), ' ', array([ 0., 1., 0., 0.]), ' ', array([ 0., 1., 0., 0.])), ('RPE5W24', ': ', array([ 0, 36, 0, 0]), ' ', array([ 0., 1., 0., 0.]), ' ', array([ 0., 1., 0., 0.])), ('RPE5W27', ': ', array([ 0, 38, 0, 0]), ' ', array([ 0., 1., 0., 0.]), ' ', array([ 0…	10010000	0.997959	0.29902	0.999945	1
591	6	95638315	TGAxGAT	G	C	[('RPE5W22', ': ', array([ 0, 0, 0, 55]), ' ', array([ 0., 0., 0., 1.]), ' ', array([ 0., 0., 0., 1.])), ('RPE5W23', ': ', array([ 0, 0, 0, 38]), ' ', array([ 0., 0., 0., 1.]), ' ', array([ 0., 0., 0., 1.])), ('RPE5W24', ': ', array([ 0, 1, 0, 34]), ' ', array([ 0. , 0.02857143, 0. , 0.97142857]), ' ', array([ 0., 0., 0., 1.])), ('RPE5W27', ': ', array([ 0, 0, 0, 49]), ' ', array([ 0., 0., 0., 1.…	10010000	0.987315	0.340144	0.999529	1
592	6	141007417	ATGxGGA	T	C	[('RPE5W22', ': ', array([ 0, 60, 0, 0]), ' ', array([ 0., 1., 0., 0.]), ' ', array([ 0., 1., 0., 0.])), ('RPE5W23', ': ', array([ 0, 42, 0, 1]), ' ', array([ 0. , 0.97674419, 0. , 0.02325581]), ' ', array([ 0., 1., 0., 0.])), ('RPE5W24', ': ', array([ 0, 33, 0, 0]), ' ', array([ 0., 1., 0., 0.]), ' ', array([ 0., 1., 0., 0.])), ('RPE5W27', ': ', array([ 0, 28, 0, 0]), ' ', array([ 0., 1., 0., 0.…	10010000	1	0.2	0.999997	1
593	7	9392765	GATxCCT	C	T	[('RPE5W22', ': ', array([ 0, 0, 79, 0]), ' ', array([ 0., 0., 1., 0.]), ' ', array([ 0., 0., 1., 0.])), ('RPE5W23', ': ', array([ 0, 0, 48, 0]), ' ', array([ 0., 0., 1., 0.]), ' ', array([ 0., 0., 1., 0.])), ('RPE5W24', ': ', array([ 0, 0, 65, 0]), ' ', array([ 0., 0., 1., 0.]), ' ', array([ 0., 0., 1., 0.])), ('RPE5W27', ': ', array([ 0, 0, 57, 0]), ' ', array([ 0., 0., 1., 0.]), ' ', array([ 0…	10010000	0.998148	0.240921	0.999996	1
594	7	76522712	GCTxGGA	G	T	[('RPE5W22', ': ', array([ 0, 1, 0, 75]), ' ', array([ 0. , 0.01315789, 0. , 0.98684211]), ' ', array([ 0., 0., 0., 1.])), ('RPE5W23', ': ', array([ 0, 0, 0, 55]), ' ', array([ 0., 0., 0., 1.]), ' ', array([ 0., 0., 0., 1.])), ('RPE5W24', ': ', array([ 0, 0, 0, 50]), ' ', array([ 0., 0., 0., 1.]), ' ', array([ 0., 0., 0., 1.])), ('RPE5W27', ': ', array([ 0, 0, 1, 52]), ' ', array([ 0. , 0. , 0.01…	10010000	0.994358	0.246212	0.999996	1
595	7	133905940	AAAxGCA	A	T	[('RPE5W22', ': ', array([74, 1, 0, 0]), ' ', array([ 0.98666667, 0.01333333, 0. , 0. ]), ' ', array([ 1., 0., 0., 0.])), ('RPE5W23', ': ', array([59, 0, 0, 1]), ' ', array([ 0.98333333, 0. , 0. , 0.01666667]), ' ', array([ 1., 0., 0., 0.])), ('RPE5W24', ': ', array([46, 2, 0, 0]), ' ', array([ 0.95833333, 0.04166667, 0. , 0. ]), ' ', array([ 1., 0., 0., 0.])), ('RPE5W27', ': ', array([45, 0, 0, …	10010000	0.989143	0.385652	1	1
596	7	141411980	TCAxATT	T	C	[('RPE5W22', ': ', array([ 0, 78, 0, 0]), ' ', array([ 0., 1., 0., 0.]), ' ', array([ 0., 1., 0., 0.])), ('RPE5W23', ': ', array([ 0, 43, 0, 0]), ' ', array([ 0., 1., 0., 0.]), ' ', array([ 0., 1., 0., 0.])), ('RPE5W24', ': ', array([ 0, 52, 0, 0]), ' ', array([ 0., 1., 0., 0.]), ' ', array([ 0., 1., 0., 0.])), ('RPE5W27', ': ', array([ 0, 41, 0, 0]), ' ', array([ 0., 1., 0., 0.]), ' ', array([ 0…	10010000	1	0.206081	0.999363	1
597	8	510929	TGCxACA	T	C	[('RPE5W22', ': ', array([ 2, 38, 0, 1]), ' ', array([ 0.04878049, 0.92682927, 0. , 0.02439024]), ' ', array([ 0., 1., 0., 0.])), ('RPE5W23', ': ', array([ 0, 28, 0, 0]), ' ', array([ 0., 1., 0., 0.]), ' ', array([ 0., 1., 0., 0.])), ('RPE5W24', ': ', array([ 1, 32, 0, 0]), ' ', array([ 0.03030303, 0.96969697, 0. , 0. ]), ' ', array([ 0., 1., 0., 0.])), ('RPE5W27', ': ', array([ 0, 28, 0, 0]), ' …	10010000	0.970139	0.366667	0.999999	1
598	8	106266853	TATxATT	C	A	[('RPE5W22', ': ', array([ 0, 0, 42, 0]), ' ', array([ 0., 0., 1., 0.]), ' ', array([ 0., 0., 1., 0.])), ('RPE5W23', ': ', array([ 0, 0, 40, 0]), ' ', array([ 0., 0., 1., 0.]), ' ', array([ 0., 0., 1., 0.])), ('RPE5W24', ': ', array([ 0, 0, 36, 0]), ' ', array([ 0., 0., 1., 0.]), ' ', array([ 0., 0., 1., 0.])), ('RPE5W27', ': ', array([ 0, 0, 29, 0]), ' ', array([ 0., 0., 1., 0.]), ' ', array([ 0…	10010000	0.996429	0.377143	0.999999	1
599	8	115721998	GCTxCTC	A	G	[('RPE5W22', ': ', array([62, 0, 0, 0]), ' ', array([ 1., 0., 0., 0.]), ' ', array([ 1., 0., 0., 0.])), ('RPE5W23', ': ', array([37, 0, 1, 1]), ' ', array([ 0.94871795, 0. , 0.02564103, 0.02564103]), ' ', array([ 1., 0., 0., 0.])), ('RPE5W24', ': ', array([42, 0, 1, 1]), ' ', array([ 0.95454545, 0. , 0.02272727, 0.02272727]), ' ', array([ 1., 0., 0., 0.])), ('RPE5W27', ': ', array([38, 0, 0, 0]),…	10010000	0.986878	0.253788	0.999829	1
600	8	132457062	GGCxCTG	A	G	[('RPE5W22', ': ', array([56, 0, 0, 0]), ' ', array([ 1., 0., 0., 0.]), ' ', array([ 1., 0., 0., 0.])), ('RPE5W23', ': ', array([31, 0, 0, 0]), ' ', array([ 1., 0., 0., 0.]), ' ', array([ 1., 0., 0., 0.])), ('RPE5W24', ': ', array([37, 0, 0, 0]), ' ', array([ 1., 0., 0., 0.]), ' ', array([ 1., 0., 0., 0.])), ('RPE5W27', ': ', array([49, 0, 0, 0]), ' ', array([ 1., 0., 0., 0.]), ' ', array([ 1., 0…	10010000	0.997917	0.295238	0.999997	1
601	8	135785565	TAAxCCC	G	A	[('RPE5W22', ': ', array([ 0, 0, 0, 63]), ' ', array([ 0., 0., 0., 1.]), ' ', array([ 0., 0., 0., 1.])), ('RPE5W23', ': ', array([ 0, 0, 0, 36]), ' ', array([ 0., 0., 0., 1.]), ' ', array([ 0., 0., 0., 1.])), ('RPE5W24', ': ', array([ 0, 0, 0, 38]), ' ', array([ 0., 0., 0., 1.]), ' ', array([ 0., 0., 0., 1.])), ('RPE5W27', ': ', array([ 0, 1, 0, 31]), ' ', array([ 0. , 0.03125, 0. , 0.96875]), ' …	10010000	0.98104	0.36697	1	1
602	11	24176552	AGAxCAG	A	G	[('RPE5W22', ': ', array([66, 0, 0, 0]), ' ', array([ 1., 0., 0., 0.]), ' ', array([ 1., 0., 0., 0.])), ('RPE5W23', ': ', array([49, 0, 1, 0]), ' ', array([ 0.98, 0. , 0.02, 0. ]), ' ', array([ 1., 0., 0., 0.])), ('RPE5W24', ': ', array([54, 0, 0, 0]), ' ', array([ 1., 0., 0., 0.]), ' ', array([ 1., 0., 0., 0.])), ('RPE5W27', ': ', array([40, 0, 0, 1]), ' ', array([ 0.97560976, 0. , 0. , 0.024390…	10010000	0.997561	0.281855	1	1
603	11	37301138	TTAxCAG	C	A	[('RPE5W22', ': ', array([ 0, 0, 61, 0]), ' ', array([ 0., 0., 1., 0.]), ' ', array([ 0., 0., 1., 0.])), ('RPE5W23', ': ', array([ 0, 0, 55, 0]), ' ', array([ 0., 0., 1., 0.]), ' ', array([ 0., 0., 1., 0.])), ('RPE5W24', ': ', array([ 0, 0, 52, 0]), ' ', array([ 0., 0., 1., 0.]), ' ', array([ 0., 0., 1., 0.])), ('RPE5W27', ': ', array([ 0, 1, 51, 0]), ' ', array([ 0. , 0.01923077, 0.98076923, 0. …	10010000	0.993403	0.266415	0.999999	1
604	11	57643498	AAAxAAA	G	A	[('RPE5W22', ': ', array([ 0, 0, 0, 57]), ' ', array([ 0., 0., 0., 1.]), ' ', array([ 0., 0., 0., 1.])), ('RPE5W23', ': ', array([ 1, 0, 0, 45]), ' ', array([ 0.02173913, 0. , 0. , 0.97826087]), ' ', array([ 0., 0., 0., 1.])), ('RPE5W24', ': ', array([ 0, 0, 0, 45]), ' ', array([ 0., 0., 0., 1.]), ' ', array([ 0., 0., 0., 1.])), ('RPE5W27', ': ', array([ 1, 1, 0, 38]), ' ', array([ 0.025, 0.025, …	10010000	0.982786	0.28869	0.999994	1
605	11	81658049	CCAxATC	G	T	[('RPE5W22', ': ', array([ 0, 1, 0, 72]), ' ', array([ 0. , 0.01369863, 0. , 0.98630137]), ' ', array([ 0., 0., 0., 1.])), ('RPE5W23', ': ', array([ 0, 0, 0, 53]), ' ', array([ 0., 0., 0., 1.]), ' ', array([ 0., 0., 0., 1.])), ('RPE5W24', ': ', array([ 0, 0, 0, 45]), ' ', array([ 0., 0., 0., 1.]), ' ', array([ 0., 0., 0., 1.])), ('RPE5W27', ': ', array([ 0, 0, 0, 49]), ' ', array([ 0., 0., 0., 1.…	10010000	0.9956	0.376263	1	1
606	11	98377913	CCTxTCT	T	C	[('RPE5W22', ': ', array([ 0, 75, 0, 1]), ' ', array([ 0. , 0.98684211, 0. , 0.01315789]), ' ', array([ 0., 1., 0., 0.])), ('RPE5W23', ': ', array([ 0, 40, 0, 0]), ' ', array([ 0., 1., 0., 0.]), ' ', array([ 0., 1., 0., 0.])), ('RPE5W24', ': ', array([ 0, 45, 0, 1]), ' ', array([ 0. , 0.97826087, 0. , 0.02173913]), ' ', array([ 0., 1., 0., 0.])), ('RPE5W27', ': ', array([ 0, 46, 0, 0]), ' ', arra…	10010000	0.992247	0.191506	0.999949	1
607	11	106509470	GTAxATA	T	G	[('RPE5W22', ': ', array([ 0, 62, 0, 0]), ' ', array([ 0., 1., 0., 0.]), ' ', array([ 0., 1., 0., 0.])), ('RPE5W23', ': ', array([ 0, 30, 0, 0]), ' ', array([ 0., 1., 0., 0.]), ' ', array([ 0., 1., 0., 0.])), ('RPE5W24', ': ', array([ 0, 36, 0, 0]), ' ', array([ 0., 1., 0., 0.]), ' ', array([ 0., 1., 0., 0.])), ('RPE5W27', ': ', array([ 0, 36, 0, 0]), ' ', array([ 0., 1., 0., 0.]), ' ', array([ 0…	110010000	0.993547	0.208559	0.997283	1
608	12	11469182	AAAxCAT	A	C	[('RPE5W22', ': ', array([68, 0, 0, 0]), ' ', array([ 1., 0., 0., 0.]), ' ', array([ 1., 0., 0., 0.])), ('RPE5W23', ': ', array([54, 0, 0, 0]), ' ', array([ 1., 0., 0., 0.]), ' ', array([ 1., 0., 0., 0.])), ('RPE5W24', ': ', array([65, 0, 0, 0]), ' ', array([ 1., 0., 0., 0.]), ' ', array([ 1., 0., 0., 0.])), ('RPE5W27', ': ', array([52, 0, 0, 0]), ' ', array([ 1., 0., 0., 0.]), ' ', array([ 1., 0…	10010000	0.993458	0.246994	0.999979	1
609	12	11469183	AAAxATG	C	A	[('RPE5W22', ': ', array([ 0, 0, 68, 0]), ' ', array([ 0., 0., 1., 0.]), ' ', array([ 0., 0., 1., 0.])), ('RPE5W23', ': ', array([ 0, 0, 53, 1]), ' ', array([ 0. , 0. , 0.98148148, 0.01851852]), ' ', array([ 0., 0., 1., 0.])), ('RPE5W24', ': ', array([ 1, 0, 62, 0]), ' ', array([ 0.01587302, 0. , 0.98412698, 0. ]), ' ', array([ 0., 0., 1., 0.])), ('RPE5W27', ': ', array([ 0, 0, 53, 0]), ' ', arra…	10010000	0.998413	0.244681	0.999998	1
610	12	23550161	GTTxCAA	T	C	[('RPE5W22', ': ', array([ 0, 72, 0, 0]), ' ', array([ 0., 1., 0., 0.]), ' ', array([ 0., 1., 0., 0.])), ('RPE5W23', ': ', array([ 0, 54, 0, 0]), ' ', array([ 0., 1., 0., 0.]), ' ', array([ 0., 1., 0., 0.])), ('RPE5W24', ': ', array([ 0, 38, 1, 0]), ' ', array([ 0. , 0.97435897, 0.02564103, 0. ]), ' ', array([ 0., 1., 0., 0.])), ('RPE5W27', ': ', array([ 1, 46, 0, 1]), ' ', array([ 0.02083333, 0.…	10010000	0.991095	0.193292	0.998873	1
611	12	30114607	TCTxCTA	G	C	[('RPE5W22', ': ', array([ 0, 1, 0, 83]), ' ', array([ 0. , 0.01190476, 0. , 0.98809524]), ' ', array([ 0., 0., 0., 1.])), ('RPE5W23', ': ', array([ 0, 0, 1, 65]), ' ', array([ 0. , 0. , 0.01515152, 0.98484848]), ' ', array([ 0., 0., 0., 1.])), ('RPE5W24', ': ', array([ 0, 0, 0, 46]), ' ', array([ 0., 0., 0., 1.]), ' ', array([ 0., 0., 0., 1.])), ('RPE5W27', ': ', array([ 0, 1, 0, 48]), ' ', arra…	10010000	0.990008	0.25098	0.999997	1
612	12	107827357	GTTxTCC	C	A	[('RPE5W22', ': ', array([ 0, 0, 53, 0]), ' ', array([ 0., 0., 1., 0.]), ' ', array([ 0., 0., 1., 0.])), ('RPE5W23', ': ', array([ 0, 0, 58, 0]), ' ', array([ 0., 0., 1., 0.]), ' ', array([ 0., 0., 1., 0.])), ('RPE5W24', ': ', array([ 0, 0, 41, 0]), ' ', array([ 0., 0., 1., 0.]), ' ', array([ 0., 0., 1., 0.])), ('RPE5W27', ': ', array([ 0, 0, 53, 1]), ' ', array([ 0. , 0. , 0.98148148, 0.01851852…	10010000	0.995584	0.196343	0.99988	1
613	13	21922064	CACxTCC	C	A	[('RPE5W22', ': ', array([ 0, 0, 53, 0]), ' ', array([ 0., 0., 1., 0.]), ' ', array([ 0., 0., 1., 0.])), ('RPE5W23', ': ', array([ 0, 0, 34, 0]), ' ', array([ 0., 0., 1., 0.]), ' ', array([ 0., 0., 1., 0.])), ('RPE5W24', ': ', array([ 1, 0, 34, 0]), ' ', array([ 0.02777778, 0. , 0.94444444, 0. ]), ' ', array([ 0., 0., 1., 0.])), ('RPE5W27', ': ', array([ 0, 0, 46, 0]), ' ', array([ 0., 0., 1., 0.…	10010000	0.991082	0.44881	1	1
614	13	91616723	CATxAGA	C	G	[('RPE5W22', ': ', array([ 0, 0, 53, 0]), ' ', array([ 0., 0., 1., 0.]), ' ', array([ 0., 0., 1., 0.])), ('RPE5W23', ': ', array([ 0, 0, 31, 0]), ' ', array([ 0., 0., 1., 0.]), ' ', array([ 0., 0., 1., 0.])), ('RPE5W24', ': ', array([ 1, 0, 39, 0]), ' ', array([ 0.025, 0. , 0.975, 0. ]), ' ', array([ 0., 0., 1., 0.])), ('RPE5W27', ': ', array([ 0, 0, 41, 0]), ' ', array([ 0., 0., 1., 0.]), ' ', a…	10010000	0.99212	0.348739	1	1
615	13	100447884	CTGxGTG	G	C	[('RPE5W22', ': ', array([ 0, 0, 0, 37]), ' ', array([ 0., 0., 0., 1.]), ' ', array([ 0., 0., 0., 1.])), ('RPE5W23', ': ', array([ 0, 0, 0, 26]), ' ', array([ 0., 0., 0., 1.]), ' ', array([ 0., 0., 0., 1.])), ('RPE5W24', ': ', array([ 0, 0, 0, 40]), ' ', array([ 0., 0., 0., 1.]), ' ', array([ 0., 0., 0., 1.])), ('RPE5W27', ': ', array([ 0, 0, 0, 23]), ' ', array([ 0., 0., 0., 1.]), ' ', array([ 0…	10010000	0.99156	0.32601	0.999986	1
616	16	82503304	TTCxTTT	C	G	[('RPE5W22', ': ', array([ 1, 0, 66, 0]), ' ', array([ 0.01492537, 0. , 0.98507463, 0. ]), ' ', array([ 0., 0., 1., 0.])), ('RPE5W23', ': ', array([ 1, 0, 50, 1]), ' ', array([ 0.01923077, 0. , 0.96153846, 0.01923077]), ' ', array([ 0., 0., 1., 0.])), ('RPE5W24', ': ', array([ 0, 0, 48, 0]), ' ', array([ 0., 0., 1., 0.]), ' ', array([ 0., 0., 1., 0.])), ('RPE5W27', ': ', array([ 0, 0, 45, 0]), ' …	10010000	0.988114	0.288889	0.999994	1
617	18	11673524	CAAxCTA	G	A	[('RPE5W22', ': ', array([ 0, 0, 0, 36]), ' ', array([ 0., 0., 0., 1.]), ' ', array([ 0., 0., 0., 1.])), ('RPE5W23', ': ', array([ 0, 0, 0, 16]), ' ', array([ 0., 0., 0., 1.]), ' ', array([ 0., 0., 0., 1.])), ('RPE5W24', ': ', array([ 0, 0, 0, 17]), ' ', array([ 0., 0., 0., 1.]), ' ', array([ 0., 0., 0., 1.])), ('RPE5W27', ': ', array([ 0, 0, 0, 24]), ' ', array([ 0., 0., 0., 1.]), ' ', array([ 0…	10010000	0.99057	0.34265	0.999518	1
618	18	41922240	TTCxCTC	C	A	[('RPE5W22', ': ', array([ 0, 0, 30, 0]), ' ', array([ 0., 0., 1., 0.]), ' ', array([ 0., 0., 1., 0.])), ('RPE5W23', ': ', array([ 0, 0, 27, 0]), ' ', array([ 0., 0., 1., 0.]), ' ', array([ 0., 0., 1., 0.])), ('RPE5W24', ': ', array([ 0, 0, 25, 0]), ' ', array([ 0., 0., 1., 0.]), ' ', array([ 0., 0., 1., 0.])), ('RPE5W27', ': ', array([ 0, 0, 27, 0]), ' ', array([ 0., 0., 1., 0.]), ' ', array([ 0…	10010000	1	0.369048	0.99994	1
619	18	72769660	GCTxTAT	C	A	[('RPE5W22', ': ', array([ 0, 0, 35, 0]), ' ', array([ 0., 0., 1., 0.]), ' ', array([ 0., 0., 1., 0.])), ('RPE5W23', ': ', array([ 0, 0, 21, 0]), ' ', array([ 0., 0., 1., 0.]), ' ', array([ 0., 0., 1., 0.])), ('RPE5W24', ': ', array([ 0, 0, 21, 0]), ' ', array([ 0., 0., 1., 0.]), ' ', array([ 0., 0., 1., 0.])), ('RPE5W27', ': ', array([ 0, 0, 21, 0]), ' ', array([ 0., 0., 1., 0.]), ' ', array([ 0…	10010000	0.990693	0.433333	0.999937	1
620	X	6161790	CACxTTG	C	A	[('RPE5W22', ': ', array([ 0, 0, 48, 0]), ' ', array([ 0., 0., 1., 0.]), ' ', array([ 0., 0., 1., 0.])), ('RPE5W23', ': ', array([ 1, 0, 39, 0]), ' ', array([ 0.025, 0. , 0.975, 0. ]), ' ', array([ 0., 0., 1., 0.])), ('RPE5W24', ': ', array([ 0, 0, 37, 0]), ' ', array([ 0., 0., 1., 0.]), ' ', array([ 0., 0., 1., 0.])), ('RPE5W27', ': ', array([ 0, 0, 39, 0]), ' ', array([ 0., 0., 1., 0.]), ' ', a…	10010000	0.997436	0.238313	0.99934	1
621	X	7008453	TTTxAAT	A	T	[('RPE5W22', ': ', array([52, 0, 0, 0]), ' ', array([ 1., 0., 0., 0.]), ' ', array([ 1., 0., 0., 0.])), ('RPE5W23', ': ', array([33, 0, 1, 0]), ' ', array([ 0.97058824, 0. , 0.02941176, 0. ]), ' ', array([ 1., 0., 0., 0.])), ('RPE5W24', ': ', array([36, 0, 0, 0]), ' ', array([ 1., 0., 0., 0.]), ' ', array([ 1., 0., 0., 0.])), ('RPE5W27', ': ', array([35, 0, 0, 0]), ' ', array([ 1., 0., 0., 0.]), …	10010000	0.997619	0.378795	1	1
622	X	32457218	TAGxCAT	G	A	[('RPE5W22', ': ', array([ 0, 0, 0, 44]), ' ', array([ 0., 0., 0., 1.]), ' ', array([ 0., 0., 0., 1.])), ('RPE5W23', ': ', array([ 0, 0, 0, 39]), ' ', array([ 0., 0., 0., 1.]), ' ', array([ 0., 0., 0., 1.])), ('RPE5W24', ': ', array([ 0, 1, 0, 38]), ' ', array([ 0. , 0.02564103, 0. , 0.97435897]), ' ', array([ 0., 0., 0., 1.])), ('RPE5W27', ': ', array([ 0, 0, 0, 37]), ' ', array([ 0., 0., 0., 1.…	10010000	0.992308	0.413095	1	1
623	X	104732913	TATxGTG	A	G	[('RPE5W22', ': ', array([42, 0, 0, 0]), ' ', array([ 1., 0., 0., 0.]), ' ', array([ 1., 0., 0., 0.])), ('RPE5W23', ': ', array([41, 0, 0, 0]), ' ', array([ 1., 0., 0., 0.]), ' ', array([ 1., 0., 0., 0.])), ('RPE5W24', ': ', array([41, 0, 0, 0]), ' ', array([ 1., 0., 0., 0.]), ' ', array([ 1., 0., 0., 0.])), ('RPE5W27', ': ', array([45, 0, 0, 0]), ' ', array([ 1., 0., 0., 0.]), ' ', array([ 1., 0…	10010000	0.997222	0.338542	1	1
624	5	120619204	GCTxATA	C	T	[('RPE5W22', ': ', array([ 1, 0, 64, 0]), ' ', array([ 0.01538462, 0. , 0.98461538, 0. ]), ' ', array([ 0., 0., 1., 0.])), ('RPE5W23', ': ', array([ 0, 0, 56, 0]), ' ', array([ 0., 0., 1., 0.]), ' ', array([ 0., 0., 1., 0.])), ('RPE5W24', ': ', array([ 0, 0, 45, 0]), ' ', array([ 0., 0., 1., 0.]), ' ', array([ 0., 0., 1., 0.])), ('RPE5W27', ': ', array([ 0, 0, 45, 0]), ' ', array([ 0., 0., 1., 0.…	10010000	0.991541	0.20269	0.999954	1
625	10	90329279	AATxGAA	A	G	[('RPE5W22', ': ', array([72, 0, 0, 0]), ' ', array([ 1., 0., 0., 0.]), ' ', array([ 1., 0., 0., 0.])), ('RPE5W23', ': ', array([46, 0, 0, 1]), ' ', array([ 0.9787234, 0. , 0. , 0.0212766]), ' ', array([ 1., 0., 0., 0.])), ('RPE5W24', ': ', array([40, 0, 0, 0]), ' ', array([ 1., 0., 0., 0.]), ' ', array([ 1., 0., 0., 0.])), ('RPE5W27', ': ', array([56, 0, 0, 0]), ' ', array([ 1., 0., 0., 0.]), ' …	10010000	1	0.252884	1	1
626	1	21931753	TGGxGAT	A	T	[('RPE5W22', ': ', array([50, 0, 1, 0]), ' ', array([ 0.98039216, 0. , 0.01960784, 0. ]), ' ', array([ 1., 0., 0., 0.])), ('RPE5W23', ': ', array([40, 0, 0, 0]), ' ', array([ 1., 0., 0., 0.]), ' ', array([ 1., 0., 0., 0.])), ('RPE5W24', ': ', array([40, 0, 0, 0]), ' ', array([ 1., 0., 0., 0.]), ' ', array([ 1., 0., 0., 0.])), ('RPE5W27', ': ', array([35, 0, 1, 0]), ' ', array([ 0.97222222, 0. , 0…	1100000	0.984084	0.277473	0.999995	1
627	1	224495153	TCCxAGA	C	A	[('RPE5W22', ': ', array([ 0, 0, 42, 0]), ' ', array([ 0., 0., 1., 0.]), ' ', array([ 0., 0., 1., 0.])), ('RPE5W23', ': ', array([ 1, 0, 45, 0]), ' ', array([ 0.02173913, 0. , 0.97826087, 0. ]), ' ', array([ 0., 0., 1., 0.])), ('RPE5W24', ': ', array([ 0, 0, 36, 0]), ' ', array([ 0., 0., 1., 0.]), ' ', array([ 0., 0., 1., 0.])), ('RPE5W27', ': ', array([ 0, 0, 27, 1]), ' ', array([ 0. , 0. , 0.96…	1100000	0.984872	0.272059	0.998927	1
628	2	64264763	CCAxCCA	C	A	[('RPE5W22', ': ', array([ 1, 0, 56, 0]), ' ', array([ 0.01754386, 0. , 0.98245614, 0. ]), ' ', array([ 0., 0., 1., 0.])), ('RPE5W23', ': ', array([ 0, 0, 33, 0]), ' ', array([ 0., 0., 1., 0.]), ' ', array([ 0., 0., 1., 0.])), ('RPE5W24', ': ', array([ 0, 0, 32, 0]), ' ', array([ 0., 0., 1., 0.]), ' ', array([ 0., 0., 1., 0.])), ('RPE5W27', ': ', array([ 1, 0, 27, 0]), ' ', array([ 0.03571429, 0.…	1100000	0.994674	0.386611	1	1
629	2	84236150	ATCxTAA	C	A	[('RPE5W22', ': ', array([ 0, 0, 59, 0]), ' ', array([ 0., 0., 1., 0.]), ' ', array([ 0., 0., 1., 0.])), ('RPE5W23', ': ', array([ 0, 0, 37, 0]), ' ', array([ 0., 0., 1., 0.]), ' ', array([ 0., 0., 1., 0.])), ('RPE5W24', ': ', array([ 0, 0, 40, 0]), ' ', array([ 0., 0., 1., 0.]), ' ', array([ 0., 0., 1., 0.])), ('RPE5W27', ': ', array([ 0, 0, 39, 0]), ' ', array([ 0., 0., 1., 0.]), ' ', array([ 0…	1100000	0.992795	0.264898	0.999304	1
630	3	164016019	GAGxACA	C	A	[('RPE5W22', ': ', array([ 1, 0, 71, 0]), ' ', array([ 0.01388889, 0. , 0.98611111, 0. ]), ' ', array([ 0., 0., 1., 0.])), ('RPE5W23', ': ', array([ 0, 0, 40, 0]), ' ', array([ 0., 0., 1., 0.]), ' ', array([ 0., 0., 1., 0.])), ('RPE5W24', ': ', array([ 1, 0, 42, 0]), ' ', array([ 0.02325581, 0. , 0.97674419, 0. ]), ' ', array([ 0., 0., 1., 0.])), ('RPE5W27', ': ', array([ 1, 0, 44, 0]), ' ', arra…	1100000	0.988797	0.398496	1	1
631	3	181229394	TCTxAGG	G	C	[('RPE5W22', ': ', array([ 0, 0, 0, 49]), ' ', array([ 0., 0., 0., 1.]), ' ', array([ 0., 0., 0., 1.])), ('RPE5W23', ': ', array([ 0, 0, 1, 38]), ' ', array([ 0. , 0. , 0.02564103, 0.97435897]), ' ', array([ 0., 0., 0., 1.])), ('RPE5W24', ': ', array([ 0, 0, 0, 26]), ' ', array([ 0., 0., 0., 1.]), ' ', array([ 0., 0., 0., 1.])), ('RPE5W27', ': ', array([ 0, 0, 0, 31]), ' ', array([ 0., 0., 0., 1.…	1100000	1	0.343137	0.999999	1
632	4	24476945	CCCxCCA	C	A	[('RPE5W22', ': ', array([ 0, 0, 37, 0]), ' ', array([ 0., 0., 1., 0.]), ' ', array([ 0., 0., 1., 0.])), ('RPE5W23', ': ', array([ 0, 0, 30, 0]), ' ', array([ 0., 0., 1., 0.]), ' ', array([ 0., 0., 1., 0.])), ('RPE5W24', ': ', array([ 0, 0, 37, 0]), ' ', array([ 0., 0., 1., 0.]), ' ', array([ 0., 0., 1., 0.])), ('RPE5W27', ': ', array([ 0, 0, 31, 0]), ' ', array([ 0., 0., 1., 0.]), ' ', array([ 0…	1100000	0.996774	0.404265	1	1
633	4	28726784	CTGxTCA	C	G	[('RPE5W22', ': ', array([ 0, 1, 48, 0]), ' ', array([ 0. , 0.02040816, 0.97959184, 0. ]), ' ', array([ 0., 0., 1., 0.])), ('RPE5W23', ': ', array([ 0, 1, 32, 0]), ' ', array([ 0. , 0.03030303, 0.96969697, 0. ]), ' ', array([ 0., 0., 1., 0.])), ('RPE5W24', ': ', array([ 0, 1, 38, 0]), ' ', array([ 0. , 0.02564103, 0.97435897, 0. ]), ' ', array([ 0., 0., 1., 0.])), ('RPE5W27', ': ', array([ 0, 0, …	1100000	0.985403	0.374531	0.999996	1
634	4	34669350	GGAxGGG	T	A	[('RPE5W22', ': ', array([ 1, 53, 0, 0]), ' ', array([ 0.01851852, 0.98148148, 0. , 0. ]), ' ', array([ 0., 1., 0., 0.])), ('RPE5W23', ': ', array([ 1, 38, 0, 0]), ' ', array([ 0.02564103, 0.97435897, 0. , 0. ]), ' ', array([ 0., 1., 0., 0.])), ('RPE5W24', ': ', array([ 0, 45, 0, 2]), ' ', array([ 0. , 0.95744681, 0. , 0.04255319]), ' ', array([ 0., 1., 0., 0.])), ('RPE5W27', ': ', array([ 0, 38,…	1100000	0.991671	0.392857	1	1
635	4	82979816	TTAxAAA	C	T	[('RPE5W22', ': ', array([ 0, 0, 47, 0]), ' ', array([ 0., 0., 1., 0.]), ' ', array([ 0., 0., 1., 0.])), ('RPE5W23', ': ', array([ 0, 0, 37, 1]), ' ', array([ 0. , 0. , 0.97368421, 0.02631579]), ' ', array([ 0., 0., 1., 0.])), ('RPE5W24', ': ', array([ 0, 0, 42, 0]), ' ', array([ 0., 0., 1., 0.]), ' ', array([ 0., 0., 1., 0.])), ('RPE5W27', ': ', array([ 1, 0, 25, 0]), ' ', array([ 0.03846154, 0.…	1100000	0.988877	0.324286	0.999992	1
636	4	126215497	TGTxTCA	C	T	[('RPE5W22', ': ', array([ 0, 0, 48, 0]), ' ', array([ 0., 0., 1., 0.]), ' ', array([ 0., 0., 1., 0.])), ('RPE5W23', ': ', array([ 1, 0, 43, 0]), ' ', array([ 0.02272727, 0. , 0.97727273, 0. ]), ' ', array([ 0., 0., 1., 0.])), ('RPE5W24', ': ', array([ 0, 0, 40, 0]), ' ', array([ 0., 0., 1., 0.]), ' ', array([ 0., 0., 1., 0.])), ('RPE5W27', ': ', array([ 1, 0, 24, 0]), ' ', array([ 0.04, 0. , 0.9…	1100000	0.986639	0.348784	0.999998	1
637	5	34819414	ACTxTAG	G	C	[('RPE5W22', ': ', array([ 0, 0, 0, 80]), ' ', array([ 0., 0., 0., 1.]), ' ', array([ 0., 0., 0., 1.])), ('RPE5W23', ': ', array([ 0, 1, 0, 59]), ' ', array([ 0. , 0.01666667, 0. , 0.98333333]), ' ', array([ 0., 0., 0., 1.])), ('RPE5W24', ': ', array([ 0, 0, 0, 52]), ' ', array([ 0., 0., 0., 1.]), ' ', array([ 0., 0., 0., 1.])), ('RPE5W27', ': ', array([ 1, 0, 0, 53]), ' ', array([ 0.01851852, 0.…	1100000	0.99202	0.235657	1	1
638	5	109331098	GAGxAAT	G	C	[('RPE5W22', ': ', array([ 1, 2, 0, 78]), ' ', array([ 0.01234568, 0.02469136, 0. , 0.96296296]), ' ', array([ 0., 0., 0., 1.])), ('RPE5W23', ': ', array([ 1, 1, 0, 49]), ' ', array([ 0.01960784, 0.01960784, 0. , 0.96078431]), ' ', array([ 0., 0., 0., 1.])), ('RPE5W24', ': ', array([ 0, 0, 0, 53]), ' ', array([ 0., 0., 0., 1.]), ' ', array([ 0., 0., 0., 1.])), ('RPE5W27', ': ', array([ 0, 0, 1, 3…	1100000	0.987395	0.238889	0.99997	1
639	6	161113397	GATxTCG	G	T	[('RPE5W22', ': ', array([ 0, 0, 0, 48]), ' ', array([ 0., 0., 0., 1.]), ' ', array([ 0., 0., 0., 1.])), ('RPE5W23', ': ', array([ 0, 0, 0, 37]), ' ', array([ 0., 0., 0., 1.]), ' ', array([ 0., 0., 0., 1.])), ('RPE5W24', ': ', array([ 0, 0, 0, 40]), ' ', array([ 0., 0., 0., 1.]), ' ', array([ 0., 0., 0., 1.])), ('RPE5W27', ': ', array([ 0, 0, 0, 46]), ' ', array([ 0., 0., 0., 1.]), ' ', array([ 0…	1100000	0.997561	0.379808	1	1
640	8	93109779	AAGxAAA	A	G	[('RPE5W22', ': ', array([50, 0, 0, 0]), ' ', array([ 1., 0., 0., 0.]), ' ', array([ 1., 0., 0., 0.])), ('RPE5W23', ': ', array([43, 0, 0, 0]), ' ', array([ 1., 0., 0., 0.]), ' ', array([ 1., 0., 0., 0.])), ('RPE5W24', ': ', array([35, 0, 0, 0]), ' ', array([ 1., 0., 0., 0.]), ' ', array([ 1., 0., 0., 0.])), ('RPE5W27', ': ', array([35, 0, 0, 0]), ' ', array([ 1., 0., 0., 0.]), ' ', array([ 1., 0…	1100000	0.992857	0.380111	0.999985	1
641	9	5135432	TCAxAGT	G	T	[('RPE5W22', ': ', array([ 0, 0, 0, 50]), ' ', array([ 0., 0., 0., 1.]), ' ', array([ 0., 0., 0., 1.])), ('RPE5W23', ': ', array([ 0, 0, 0, 42]), ' ', array([ 0., 0., 0., 1.]), ' ', array([ 0., 0., 0., 1.])), ('RPE5W24', ': ', array([ 0, 0, 1, 38]), ' ', array([ 0. , 0. , 0.02564103, 0.97435897]), ' ', array([ 0., 0., 0., 1.])), ('RPE5W27', ': ', array([ 0, 0, 0, 44]), ' ', array([ 0., 0., 0., 1.…	1100000	0.994997	0.247725	0.999987	1
642	9	68207301	AGGxAAG	T	A	[('RPE5W22', ': ', array([ 1, 65, 0, 0]), ' ', array([ 0.01515152, 0.98484848, 0. , 0. ]), ' ', array([ 0., 1., 0., 0.])), ('RPE5W23', ': ', array([ 0, 55, 0, 1]), ' ', array([ 0. , 0.98214286, 0. , 0.01785714]), ' ', array([ 0., 1., 0., 0.])), ('RPE5W24', ': ', array([ 1, 69, 0, 1]), ' ', array([ 0.01408451, 0.97183099, 0. , 0.01408451]), ' ', array([ 0., 1., 0., 0.])), ('RPE5W27', ': ', array([…	1100000	0.975521	0.209764	0.99974	1
643	9	88981561	GATxGGG	T	C	[('RPE5W22', ': ', array([ 0, 58, 0, 1]), ' ', array([ 0. , 0.98305085, 0. , 0.01694915]), ' ', array([ 0., 1., 0., 0.])), ('RPE5W23', ': ', array([ 0, 50, 0, 1]), ' ', array([ 0. , 0.98039216, 0. , 0.01960784]), ' ', array([ 0., 1., 0., 0.])), ('RPE5W24', ': ', array([ 0, 29, 0, 0]), ' ', array([ 0., 1., 0., 0.]), ' ', array([ 0., 1., 0., 0.])), ('RPE5W27', ': ', array([ 0, 50, 0, 1]), ' ', arra…	1100000	0.979771	0.255622	0.999629	1
644	9	138283454	GCAxACC	G	T	[('RPE5W22', ': ', array([ 0, 1, 0, 58]), ' ', array([ 0. , 0.01694915, 0. , 0.98305085]), ' ', array([ 0., 0., 0., 1.])), ('RPE5W23', ': ', array([ 0, 2, 0, 43]), ' ', array([ 0. , 0.04444444, 0. , 0.95555556]), ' ', array([ 0., 0., 0., 1.])), ('RPE5W24', ': ', array([ 0, 0, 0, 43]), ' ', array([ 0., 0., 0., 1.]), ' ', array([ 0., 0., 0., 1.])), ('RPE5W27', ': ', array([ 0, 0, 0, 35]), ' ', arra…	1100000	0.998305	0.346154	0.999999	1
645	10	33400608	CATxTGT	A	G	[('RPE5W22', ': ', array([44, 0, 0, 0]), ' ', array([ 1., 0., 0., 0.]), ' ', array([ 1., 0., 0., 0.])), ('RPE5W23', ': ', array([28, 0, 0, 0]), ' ', array([ 1., 0., 0., 0.]), ' ', array([ 1., 0., 0., 0.])), ('RPE5W24', ': ', array([24, 0, 0, 0]), ' ', array([ 1., 0., 0., 0.]), ' ', array([ 1., 0., 0., 0.])), ('RPE5W27', ': ', array([19, 0, 0, 0]), ' ', array([ 1., 0., 0., 0.]), ' ', array([ 1., 0…	1100000	0.996296	0.494815	1	1
646	10	127090002	TCTxCAT	C	T	[('RPE5W22', ': ', array([ 0, 0, 58, 0]), ' ', array([ 0., 0., 1., 0.]), ' ', array([ 0., 0., 1., 0.])), ('RPE5W23', ': ', array([ 0, 0, 61, 0]), ' ', array([ 0., 0., 1., 0.]), ' ', array([ 0., 0., 1., 0.])), ('RPE5W24', ': ', array([ 0, 0, 46, 0]), ' ', array([ 0., 0., 1., 0.]), ' ', array([ 0., 0., 1., 0.])), ('RPE5W27', ': ', array([ 0, 0, 53, 0]), ' ', array([ 0., 0., 1., 0.]), ' ', array([ 0…	1100000	0.991292	0.201079	0.998337	1
647	10	132624515	CTTxTTG	C	A	[('RPE5W22', ': ', array([ 0, 0, 90, 0]), ' ', array([ 0., 0., 1., 0.]), ' ', array([ 0., 0., 1., 0.])), ('RPE5W23', ': ', array([ 0, 0, 51, 0]), ' ', array([ 0., 0., 1., 0.]), ' ', array([ 0., 0., 1., 0.])), ('RPE5W24', ': ', array([ 1, 0, 59, 0]), ' ', array([ 0.01666667, 0. , 0.98333333, 0. ]), ' ', array([ 0., 0., 1., 0.])), ('RPE5W27', ': ', array([ 0, 1, 59, 0]), ' ', array([ 0. , 0.0166666…	1100000	0.996667	0.253095	0.999999	1
648	11	91941709	ATGxATA	C	A	[('RPE5W22', ': ', array([ 0, 0, 81, 0]), ' ', array([ 0., 0., 1., 0.]), ' ', array([ 0., 0., 1., 0.])), ('RPE5W23', ': ', array([ 0, 0, 52, 0]), ' ', array([ 0., 0., 1., 0.]), ' ', array([ 0., 0., 1., 0.])), ('RPE5W24', ': ', array([ 0, 0, 52, 0]), ' ', array([ 0., 0., 1., 0.]), ' ', array([ 0., 0., 1., 0.])), ('RPE5W27', ': ', array([ 1, 1, 45, 0]), ' ', array([ 0.0212766 , 0.0212766 , 0.957446…	1100000	0.995745	0.33631	1	1
649	13	93995422	TACxTTT	A	G	[('RPE5W22', ': ', array([45, 0, 0, 0]), ' ', array([ 1., 0., 0., 0.]), ' ', array([ 1., 0., 0., 0.])), ('RPE5W23', ': ', array([37, 0, 0, 1]), ' ', array([ 0.97368421, 0. , 0. , 0.02631579]), ' ', array([ 1., 0., 0., 0.])), ('RPE5W24', ': ', array([37, 0, 0, 1]), ' ', array([ 0.97368421, 0. , 0. , 0.02631579]), ' ', array([ 1., 0., 0., 0.])), ('RPE5W27', ': ', array([36, 0, 1, 0]), ' ', array([ …	1100000	0.970792	0.447262	1	1
650	14	27157449	TCAxAAA	G	T	[('RPE5W22', ': ', array([ 0, 0, 0, 62]), ' ', array([ 0., 0., 0., 1.]), ' ', array([ 0., 0., 0., 1.])), ('RPE5W23', ': ', array([ 0, 0, 0, 38]), ' ', array([ 0., 0., 0., 1.]), ' ', array([ 0., 0., 0., 1.])), ('RPE5W24', ': ', array([ 0, 0, 0, 32]), ' ', array([ 0., 0., 0., 1.]), ' ', array([ 0., 0., 0., 1.])), ('RPE5W27', ': ', array([ 0, 0, 0, 25]), ' ', array([ 0., 0., 0., 1.]), ' ', array([ 0…	1100000	0.997436	0.472222	1	1
651	14	98436955	GGAxATA	G	T	[('RPE5W22', ': ', array([ 1, 0, 0, 65]), ' ', array([ 0.01515152, 0. , 0. , 0.98484848]), ' ', array([ 0., 0., 0., 1.])), ('RPE5W23', ': ', array([ 0, 0, 0, 43]), ' ', array([ 0., 0., 0., 1.]), ' ', array([ 0., 0., 0., 1.])), ('RPE5W24', ': ', array([ 2, 0, 0, 41]), ' ', array([ 0.04651163, 0. , 0. , 0.95348837]), ' ', array([ 0., 0., 0., 1.])), ('RPE5W27', ': ', array([ 1, 0, 0, 36]), ' ', arra…	1100000	0.988631	0.348346	0.999982	1
652	16	13849839	CTTxAAA	C	G	[('RPE5W22', ': ', array([ 1, 0, 62, 0]), ' ', array([ 0.01587302, 0. , 0.98412698, 0. ]), ' ', array([ 0., 0., 1., 0.])), ('RPE5W23', ': ', array([ 0, 0, 54, 0]), ' ', array([ 0., 0., 1., 0.]), ' ', array([ 0., 0., 1., 0.])), ('RPE5W24', ': ', array([ 0, 0, 52, 0]), ' ', array([ 0., 0., 1., 0.]), ' ', array([ 0., 0., 1., 0.])), ('RPE5W27', ': ', array([ 0, 0, 40, 1]), ' ', array([ 0. , 0. , 0.97…	1100000	0.990045	0.295	0.999996	1
653	16	32525618	TTTxTGT	T	G	[('RPE5W22', ': ', array([ 0, 184, 0, 1]), ' ', array([ 0. , 0.99459459, 0. , 0.00540541]), ' ', array([ 0., 1., 0., 0.])), ('RPE5W23', ': ', array([ 0, 159, 0, 0]), ' ', array([ 0., 1., 0., 0.]), ' ', array([ 0., 1., 0., 0.])), ('RPE5W24', ': ', array([ 0, 134, 0, 0]), ' ', array([ 0., 1., 0., 0.]), ' ', array([ 0., 1., 0., 0.])), ('RPE5W27', ': ', array([ 0, 124, 0, 0]), ' ', array([ 0., 1., 0.…	1100000	0.99796	0.0764311	0.999991	1
654	16	65703692	CATxAAT	C	A	[('RPE5W22', ': ', array([ 0, 0, 59, 0]), ' ', array([ 0., 0., 1., 0.]), ' ', array([ 0., 0., 1., 0.])), ('RPE5W23', ': ', array([ 0, 0, 57, 0]), ' ', array([ 0., 0., 1., 0.]), ' ', array([ 0., 0., 1., 0.])), ('RPE5W24', ': ', array([ 1, 0, 51, 0]), ' ', array([ 0.01923077, 0. , 0.98076923, 0. ]), ' ', array([ 0., 0., 1., 0.])), ('RPE5W27', ': ', array([ 0, 0, 42, 0]), ' ', array([ 0., 0., 1., 0.…	1100000	0.990926	0.218944	0.999967	1
655	18	24559161	ATCxTCT	T	C	[('RPE5W22', ': ', array([ 0, 29, 0, 0]), ' ', array([ 0., 1., 0., 0.]), ' ', array([ 0., 1., 0., 0.])), ('RPE5W23', ': ', array([ 0, 32, 0, 0]), ' ', array([ 0., 1., 0., 0.]), ' ', array([ 0., 1., 0., 0.])), ('RPE5W24', ': ', array([ 0, 12, 0, 0]), ' ', array([ 0., 1., 0., 0.]), ' ', array([ 0., 1., 0., 0.])), ('RPE5W27', ': ', array([ 0, 21, 0, 0]), ' ', array([ 0., 1., 0., 0.]), ' ', array([ 0…	1100000	0.990625	0.642105	1	1
656	20	20268352	TTAxGTT	T	C	[('RPE5W22', ': ', array([ 0, 72, 0, 0]), ' ', array([ 0., 1., 0., 0.]), ' ', array([ 0., 1., 0., 0.])), ('RPE5W23', ': ', array([ 0, 54, 0, 0]), ' ', array([ 0., 1., 0., 0.]), ' ', array([ 0., 1., 0., 0.])), ('RPE5W24', ': ', array([ 0, 44, 0, 1]), ' ', array([ 0. , 0.97777778, 0. , 0.02222222]), ' ', array([ 0., 1., 0., 0.])), ('RPE5W27', ': ', array([ 1, 38, 0, 0]), ' ', array([ 0.02564103, 0.…	1100000	0.990956	0.179739	0.99953	1
657	20	38009568	AGAxTCT	A	T	[('RPE5W22', ': ', array([71, 0, 0, 1]), ' ', array([ 0.98611111, 0. , 0. , 0.01388889]), ' ', array([ 1., 0., 0., 0.])), ('RPE5W23', ': ', array([35, 0, 0, 0]), ' ', array([ 1., 0., 0., 0.]), ' ', array([ 1., 0., 0., 0.])), ('RPE5W24', ': ', array([68, 0, 0, 0]), ' ', array([ 1., 0., 0., 0.]), ' ', array([ 1., 0., 0., 0.])), ('RPE5W27', ': ', array([44, 0, 1, 0]), ' ', array([ 0.97777778, 0. , 0…	1100000	0.994116	0.287826	1	1
658	21	40089955	AGCxAGC	A	G	[('RPE5W22', ': ', array([55, 0, 0, 0]), ' ', array([ 1., 0., 0., 0.]), ' ', array([ 1., 0., 0., 0.])), ('RPE5W23', ': ', array([26, 0, 0, 0]), ' ', array([ 1., 0., 0., 0.]), ' ', array([ 1., 0., 0., 0.])), ('RPE5W24', ': ', array([33, 0, 0, 0]), ' ', array([ 1., 0., 0., 0.]), ' ', array([ 1., 0., 0., 0.])), ('RPE5W27', ': ', array([30, 0, 0, 0]), ' ', array([ 1., 0., 0., 0.]), ' ', array([ 1., 0…	1100000	0.995075	0.286732	0.998713	1
659	X	25473228	AAAxCAG	C	A	[('RPE5W22', ': ', array([ 1, 0, 60, 0]), ' ', array([ 0.01639344, 0. , 0.98360656, 0. ]), ' ', array([ 0., 0., 1., 0.])), ('RPE5W23', ': ', array([ 0, 0, 43, 0]), ' ', array([ 0., 0., 1., 0.]), ' ', array([ 0., 0., 1., 0.])), ('RPE5W24', ': ', array([ 0, 0, 28, 0]), ' ', array([ 0., 0., 1., 0.]), ' ', array([ 0., 0., 1., 0.])), ('RPE5W27', ': ', array([ 0, 0, 28, 0]), ' ', array([ 0., 0., 1., 0.…	1100000	0.995658	0.338095	0.999999	1
660	X	36602535	TATxTAC	A	G	[('RPE5W22', ': ', array([55, 0, 0, 0]), ' ', array([ 1., 0., 0., 0.]), ' ', array([ 1., 0., 0., 0.])), ('RPE5W23', ': ', array([27, 0, 0, 0]), ' ', array([ 1., 0., 0., 0.]), ' ', array([ 1., 0., 0., 0.])), ('RPE5W24', ': ', array([21, 0, 0, 0]), ' ', array([ 1., 0., 0., 0.]), ' ', array([ 1., 0., 0., 0.])), ('RPE5W27', ': ', array([26, 0, 0, 0]), ' ', array([ 1., 0., 0., 0.]), ' ', array([ 1., 0…	1100000	0.986111	0.438998	0.999839	1
661	X	57185441	TGAxTTA	A	C	[('RPE5W22', ': ', array([48, 1, 0, 0]), ' ', array([ 0.97959184, 0.02040816, 0. , 0. ]), ' ', array([ 1., 0., 0., 0.])), ('RPE5W23', ': ', array([37, 0, 1, 0]), ' ', array([ 0.97368421, 0. , 0.02631579, 0. ]), ' ', array([ 1., 0., 0., 0.])), ('RPE5W24', ': ', array([40, 0, 0, 0]), ' ', array([ 1., 0., 0., 0.]), ' ', array([ 1., 0., 0., 0.])), ('RPE5W27', ': ', array([41, 0, 0, 0]), ' ', array([ …	1100000	0.985306	0.354469	1	1
662	1	159937064	AATxCTA	G	A	[('RPE5W22', ': ', array([ 0, 1, 0, 55]), ' ', array([ 0. , 0.01785714, 0. , 0.98214286]), ' ', array([ 0., 0., 0., 1.])), ('RPE5W23', ': ', array([ 0, 1, 0, 39]), ' ', array([ 0. , 0.025, 0. , 0.975]), ' ', array([ 0., 0., 0., 1.])), ('RPE5W24', ': ', array([ 0, 0, 0, 39]), ' ', array([ 0., 0., 0., 1.]), ' ', array([ 0., 0., 0., 1.])), ('RPE5W27', ': ', array([ 0, 0, 0, 51]), ' ', array([ 0., 0.…	1100000	0.995089	0.262837	0.999886	1
663	1	2415246	CGTxTGG	G	T	[('RPE5W22', ': ', array([ 0, 18, 0, 37]), ' ', array([ 0. , 0.32727273, 0. , 0.67272727]), ' ', array([ 0., 1., 0., 1.])), ('RPE5W23', ': ', array([ 0, 0, 0, 45]), ' ', array([ 0., 0., 0., 1.]), ' ', array([ 0., 0., 0., 1.])), ('RPE5W24', ': ', array([ 0, 4, 0, 36]), ' ', array([ 0. , 0.1, 0. , 0.9]), ' ', array([ 0., 0., 0., 1.])), ('RPE5W27', ': ', array([ 0, 0, 0, 40]), ' ', array([ 0., 0., 0…	1000000000000	0.923469	0.327273	0.995935	0
664	1	25728705	TCTxTCT	A	G	[('RPE5W22', ': ', array([31, 1, 0, 12]), ' ', array([ 0.70454545, 0.02272727, 0. , 0.27272727]), ' ', array([ 1., 0., 0., 1.])), ('RPE5W23', ': ', array([43, 0, 0, 0]), ' ', array([ 1., 0., 0., 0.]), ' ', array([ 1., 0., 0., 0.])), ('RPE5W24', ': ', array([31, 0, 0, 0]), ' ', array([ 1., 0., 0., 0.]), ' ', array([ 1., 0., 0., 0.])), ('RPE5W27', ': ', array([24, 0, 1, 0]), ' ', array([ 0.96, 0. ,…	1000000000000	0.988079	0.272727	0.999174	0
665	1	162737608	TGTxTGT	G	T	[('RPE5W22', ': ', array([ 0, 16, 0, 35]), ' ', array([ 0. , 0.31372549, 0. , 0.68627451]), ' ', array([ 0., 1., 0., 1.])), ('RPE5W23', ': ', array([ 0, 0, 0, 34]), ' ', array([ 0., 0., 0., 1.]), ' ', array([ 0., 0., 0., 1.])), ('RPE5W24', ': ', array([ 0, 0, 0, 32]), ' ', array([ 0., 0., 0., 1.]), ' ', array([ 0., 0., 0., 1.])), ('RPE5W27', ': ', array([ 0, 1, 0, 46]), ' ', array([ 0. , 0.021276…	1000000000000	0.98548	0.313725	0.999764	0
666	1	192450093	TGTxTGT	G	A	[('RPE5W22', ': ', array([12, 0, 0, 36]), ' ', array([ 0.25, 0. , 0. , 0.75]), ' ', array([ 1., 0., 0., 1.])), ('RPE5W23', ': ', array([ 0, 0, 0, 32]), ' ', array([ 0., 0., 0., 1.]), ' ', array([ 0., 0., 0., 1.])), ('RPE5W24', ': ', array([ 0, 1, 0, 25]), ' ', array([ 0. , 0.03846154, 0. , 0.96153846]), ' ', array([ 0., 0., 0., 1.])), ('RPE5W27', ': ', array([ 0, 0, 0, 34]), ' ', array([ 0., 0., …	1000000000000	0.982206	0.25	0.998079	0
667	1	211260996	ACAxACA	C	T	[('RPE5W22', ': ', array([ 0, 17, 38, 0]), ' ', array([ 0. , 0.30909091, 0.69090909, 0. ]), ' ', array([ 0., 1., 1., 0.])), ('RPE5W23', ': ', array([ 0, 0, 36, 0]), ' ', array([ 0., 0., 1., 0.]), ' ', array([ 0., 0., 1., 0.])), ('RPE5W24', ': ', array([ 0, 0, 41, 0]), ' ', array([ 0., 0., 1., 0.]), ' ', array([ 0., 0., 1., 0.])), ('RPE5W27', ': ', array([ 0, 0, 28, 0]), ' ', array([ 0., 0., 1., 0…	1000000000000	0.99697	0.309091	0.999997	0
668	1	230303673	TTTxACA	T	C	[('RPE5W22', ': ', array([ 0, 37, 19, 0]), ' ', array([ 0. , 0.66071429, 0.33928571, 0. ]), ' ', array([ 0., 1., 1., 0.])), ('RPE5W23', ': ', array([ 0, 43, 0, 0]), ' ', array([ 0., 1., 0., 0.]), ' ', array([ 0., 1., 0., 0.])), ('RPE5W24', ': ', array([ 0, 50, 0, 0]), ' ', array([ 0., 1., 0., 0.]), ' ', array([ 0., 1., 0., 0.])), ('RPE5W27', ': ', array([ 0, 43, 0, 0]), ' ', array([ 0., 1., 0., 0…	1000000000000	0.998106	0.339286	0.999999	0
669	2	5120849	ATTxTGG	C	A	[('RPE5W22', ': ', array([ 9, 0, 40, 0]), ' ', array([ 0.18367347, 0. , 0.81632653, 0. ]), ' ', array([ 0., 0., 1., 0.])), ('RPE5W23', ': ', array([ 0, 0, 34, 0]), ' ', array([ 0., 0., 1., 0.]), ' ', array([ 0., 0., 1., 0.])), ('RPE5W24', ': ', array([ 0, 0, 34, 0]), ' ', array([ 0., 0., 1., 0.]), ' ', array([ 0., 0., 1., 0.])), ('RPE5W27', ': ', array([ 0, 0, 28, 0]), ' ', array([ 0., 0., 1., 0.…	1000000000000	0.992303	0.183673	0.992883	0
670	2	30176144	AAAxAAA	G	C	[('RPE5W22', ': ', array([ 0, 0, 15, 41]), ' ', array([ 0. , 0. , 0.26785714, 0.73214286]), ' ', array([ 0., 0., 1., 1.])), ('RPE5W23', ': ', array([ 0, 0, 0, 49]), ' ', array([ 0., 0., 0., 1.]), ' ', array([ 0., 0., 0., 1.])), ('RPE5W24', ': ', array([ 0, 0, 0, 40]), ' ', array([ 0., 0., 0., 1.]), ' ', array([ 0., 0., 0., 1.])), ('RPE5W27', ': ', array([ 0, 0, 0, 42]), ' ', array([ 0., 0., 0., 1…	1000000000000	0.994886	0.267857	0.99977	0
671	2	131026320	CTCxATT	C	A	[('RPE5W22', ': ', array([14, 0, 66, 0]), ' ', array([ 0.175, 0. , 0.825, 0. ]), ' ', array([ 0., 0., 1., 0.])), ('RPE5W23', ': ', array([ 1, 0, 40, 0]), ' ', array([ 0.02439024, 0. , 0.97560976, 0. ]), ' ', array([ 0., 0., 1., 0.])), ('RPE5W24', ': ', array([ 0, 0, 68, 0]), ' ', array([ 0., 0., 1., 0.]), ' ', array([ 0., 0., 1., 0.])), ('RPE5W27', ': ', array([ 0, 0, 61, 0]), ' ', array([ 0., 0.…	1000000000000	0.996809	0.175	0.993088	0
672	2	180632671	ATAxTTT	T	G	[('RPE5W22', ': ', array([ 0, 41, 0, 12]), ' ', array([ 0. , 0.77358491, 0. , 0.22641509]), ' ', array([ 0., 1., 0., 1.])), ('RPE5W23', ': ', array([ 0, 36, 0, 0]), ' ', array([ 0., 1., 0., 0.]), ' ', array([ 0., 1., 0., 0.])), ('RPE5W24', ': ', array([ 1, 33, 0, 0]), ' ', array([ 0.02941176, 0.97058824, 0. , 0. ]), ' ', array([ 0., 1., 0., 0.])), ('RPE5W27', ': ', array([ 0, 47, 0, 0]), ' ', arr…	1000000000000	0.990592	0.226415	0.992558	0
673	3	23912853	GACxGGG	G	T	[('RPE5W22', ': ', array([ 0, 22, 0, 52]), ' ', array([ 0. , 0.2972973, 0. , 0.7027027]), ' ', array([ 0., 1., 0., 1.])), ('RPE5W23', ': ', array([ 0, 0, 0, 28]), ' ', array([ 0., 0., 0., 1.]), ' ', array([ 0., 0., 0., 1.])), ('RPE5W24', ': ', array([ 0, 0, 0, 34]), ' ', array([ 0., 0., 0., 1.]), ' ', array([ 0., 0., 0., 1.])), ('RPE5W27', ': ', array([ 0, 0, 0, 37]), ' ', array([ 0., 0., 0., 1.]…	1000000000000	0.980259	0.297297	0.99657	0
674	3	116502793	TCCxTCA	C	A	[('RPE5W22', ': ', array([13, 1, 40, 0]), ' ', array([ 0.24074074, 0.01851852, 0.74074074, 0. ]), ' ', array([ 1., 0., 1., 0.])), ('RPE5W23', ': ', array([ 0, 0, 29, 0]), ' ', array([ 0., 0., 1., 0.]), ' ', array([ 0., 0., 1., 0.])), ('RPE5W24', ': ', array([ 1, 1, 42, 0]), ' ', array([ 0.02272727, 0.02272727, 0.95454545, 0. ]), ' ', array([ 0., 0., 1., 0.])), ('RPE5W27', ': ', array([ 0, 0, 37, …	1000000000000	0.993027	0.240741	0.999432	0
675	3	154885047	ATTxGGA	G	T	[('RPE5W22', ': ', array([ 0, 21, 0, 36]), ' ', array([ 0. , 0.36842105, 0. , 0.63157895]), ' ', array([ 0., 1., 0., 1.])), ('RPE5W23', ': ', array([ 0, 0, 0, 36]), ' ', array([ 0., 0., 0., 1.]), ' ', array([ 0., 0., 0., 1.])), ('RPE5W24', ': ', array([ 0, 0, 0, 38]), ' ', array([ 0., 0., 0., 1.]), ' ', array([ 0., 0., 0., 1.])), ('RPE5W27', ': ', array([ 0, 0, 0, 40]), ' ', array([ 0., 0., 0., 1…	1000000000000	0.994468	0.368421	0.999995	0
676	4	65296252	GCAxATT	G	T	[('RPE5W22', ': ', array([ 0, 12, 0, 51]), ' ', array([ 0. , 0.19047619, 0. , 0.80952381]), ' ', array([ 0., 0., 0., 1.])), ('RPE5W23', ': ', array([ 0, 0, 0, 45]), ' ', array([ 0., 0., 0., 1.]), ' ', array([ 0., 0., 0., 1.])), ('RPE5W24', ': ', array([ 0, 0, 0, 45]), ' ', array([ 0., 0., 0., 1.]), ' ', array([ 0., 0., 0., 1.])), ('RPE5W27', ': ', array([ 0, 0, 0, 29]), ' ', array([ 0., 0., 0., 1…	1000000000000	0.99169	0.190476	0.994901	0
677	4	166738688	TTTxTAT	C	A	[('RPE5W22', ': ', array([11, 0, 37, 0]), ' ', array([ 0.22916667, 0. , 0.77083333, 0. ]), ' ', array([ 1., 0., 1., 0.])), ('RPE5W23', ': ', array([ 0, 0, 32, 0]), ' ', array([ 0., 0., 1., 0.]), ' ', array([ 0., 0., 1., 0.])), ('RPE5W24', ': ', array([ 0, 0, 35, 0]), ' ', array([ 0., 0., 1., 0.]), ' ', array([ 0., 0., 1., 0.])), ('RPE5W27', ': ', array([ 0, 0, 40, 0]), ' ', array([ 0., 0., 1., 0.…	1000000000000	0.993658	0.229167	0.999818	0
678	5	2476461	TGAxAAT	G	T	[('RPE5W22', ': ', array([ 0, 25, 0, 58]), ' ', array([ 0. , 0.30120482, 0. , 0.69879518]), ' ', array([ 0., 1., 0., 1.])), ('RPE5W23', ': ', array([ 0, 0, 0, 52]), ' ', array([ 0., 0., 0., 1.]), ' ', array([ 0., 0., 0., 1.])), ('RPE5W24', ': ', array([ 0, 1, 0, 46]), ' ', array([ 0. , 0.0212766, 0. , 0.9787234]), ' ', array([ 0., 0., 0., 1.])), ('RPE5W27', ': ', array([ 0, 0, 0, 52]), ' ', array…	1000000000000	0.990855	0.301205	0.999992	0
679	5	120061797	GTAxTGA	C	G	[('RPE5W22', ': ', array([ 0, 0, 51, 17]), ' ', array([ 0. , 0. , 0.75, 0.25]), ' ', array([ 0., 0., 1., 1.])), ('RPE5W23', ': ', array([ 0, 0, 51, 0]), ' ', array([ 0., 0., 1., 0.]), ' ', array([ 0., 0., 1., 0.])), ('RPE5W24', ': ', array([ 0, 0, 66, 0]), ' ', array([ 0., 0., 1., 0.]), ' ', array([ 0., 0., 1., 0.])), ('RPE5W27', ': ', array([ 0, 0, 49, 0]), ' ', array([ 0., 0., 1., 0.]), ' ', ar…	1000000000000	0.997835	0.25	0.999999	0
680	5	153166268	AGGxAAG	C	A	[('RPE5W22', ': ', array([12, 0, 45, 0]), ' ', array([ 0.21052632, 0. , 0.78947368, 0. ]), ' ', array([ 1., 0., 1., 0.])), ('RPE5W23', ': ', array([ 0, 0, 48, 0]), ' ', array([ 0., 0., 1., 0.]), ' ', array([ 0., 0., 1., 0.])), ('RPE5W24', ': ', array([ 1, 0, 55, 0]), ' ', array([ 0.01785714, 0. , 0.98214286, 0. ]), ' ', array([ 0., 0., 1., 0.])), ('RPE5W27', ': ', array([ 1, 0, 40, 0]), ' ', arra…	1000000000000	0.989393	0.210526	0.999794	0
681	6	12428194	TTTxAAC	C	A	[('RPE5W22', ': ', array([19, 0, 47, 0]), ' ', array([ 0.28787879, 0. , 0.71212121, 0. ]), ' ', array([ 1., 0., 1., 0.])), ('RPE5W23', ': ', array([ 0, 0, 28, 0]), ' ', array([ 0., 0., 1., 0.]), ' ', array([ 0., 0., 1., 0.])), ('RPE5W24', ': ', array([ 0, 0, 46, 0]), ' ', array([ 0., 0., 1., 0.]), ' ', array([ 0., 0., 1., 0.])), ('RPE5W27', ': ', array([ 0, 0, 50, 0]), ' ', array([ 0., 0., 1., 0.…	1000000000000	1	0.287879	0.999983	0
682	6	123740964	AGTxCTA	G	T	[('RPE5W22', ': ', array([ 0, 21, 0, 57]), ' ', array([ 0. , 0.26923077, 0. , 0.73076923]), ' ', array([ 0., 1., 0., 1.])), ('RPE5W23', ': ', array([ 0, 0, 0, 39]), ' ', array([ 0., 0., 0., 1.]), ' ', array([ 0., 0., 0., 1.])), ('RPE5W24', ': ', array([ 0, 0, 0, 52]), ' ', array([ 0., 0., 0., 1.]), ' ', array([ 0., 0., 0., 1.])), ('RPE5W27', ': ', array([ 0, 0, 0, 41]), ' ', array([ 0., 0., 0., 1…	1000000000000	0.992109	0.269231	0.999166	0
683	6	160763061	ATTxGAC	G	C	[('RPE5W22', ': ', array([ 0, 0, 22, 33]), ' ', array([ 0. , 0. , 0.4, 0.6]), ' ', array([ 0., 0., 1., 1.])), ('RPE5W23', ': ', array([ 0, 0, 0, 42]), ' ', array([ 0., 0., 0., 1.]), ' ', array([ 0., 0., 0., 1.])), ('RPE5W24', ': ', array([ 0, 0, 0, 37]), ' ', array([ 0., 0., 0., 1.]), ' ', array([ 0., 0., 0., 1.])), ('RPE5W27', ': ', array([ 0, 0, 0, 41]), ' ', array([ 0., 0., 0., 1.]), ' ', arra…	1000000000000	0.992231	0.4	1	0
684	7	85022278	CACxTGA	C	A	[('RPE5W22', ': ', array([13, 0, 63, 0]), ' ', array([ 0.17105263, 0. , 0.82894737, 0. ]), ' ', array([ 0., 0., 1., 0.])), ('RPE5W23', ': ', array([ 1, 0, 47, 0]), ' ', array([ 0.02083333, 0. , 0.97916667, 0. ]), ' ', array([ 0., 0., 1., 0.])), ('RPE5W24', ': ', array([ 0, 0, 47, 0]), ' ', array([ 0., 0., 1., 0.]), ' ', array([ 0., 0., 1., 0.])), ('RPE5W27', ': ', array([ 0, 0, 47, 0]), ' ', arra…	1000000000000	0.995914	0.171053	0.997534	0
685	7	88296745	AATxGTT	A	C	[('RPE5W22', ': ', array([65, 0, 11, 0]), ' ', array([ 0.85526316, 0. , 0.14473684, 0. ]), ' ', array([ 1., 0., 0., 0.])), ('RPE5W23', ': ', array([52, 0, 0, 0]), ' ', array([ 1., 0., 0., 0.]), ' ', array([ 1., 0., 0., 0.])), ('RPE5W24', ': ', array([64, 0, 0, 0]), ' ', array([ 1., 0., 0., 0.]), ' ', array([ 1., 0., 0., 0.])), ('RPE5W27', ': ', array([47, 0, 0, 0]), ' ', array([ 1., 0., 0., 0.]),…	1000000000000	0.998701	0.144737	0.991911	0
686	7	111626719	AGTxTTA	A	G	[('RPE5W22', ': ', array([50, 0, 0, 17]), ' ', array([ 0.74626866, 0. , 0. , 0.25373134]), ' ', array([ 1., 0., 0., 1.])), ('RPE5W23', ': ', array([42, 0, 0, 0]), ' ', array([ 1., 0., 0., 0.]), ' ', array([ 1., 0., 0., 0.])), ('RPE5W24', ': ', array([46, 0, 0, 0]), ' ', array([ 1., 0., 0., 0.]), ' ', array([ 1., 0., 0., 0.])), ('RPE5W27', ': ', array([52, 0, 1, 1]), ' ', array([ 0.96296296, 0. , …	1000000000000	0.990223	0.253731	0.999991	0
687	7	113315240	AAAxCAT	C	A	[('RPE5W22', ': ', array([13, 0, 56, 0]), ' ', array([ 0.1884058, 0. , 0.8115942, 0. ]), ' ', array([ 0., 0., 1., 0.])), ('RPE5W23', ': ', array([ 0, 0, 59, 0]), ' ', array([ 0., 0., 1., 0.]), ' ', array([ 0., 0., 1., 0.])), ('RPE5W24', ': ', array([ 0, 0, 49, 0]), ' ', array([ 0., 0., 1., 0.]), ' ', array([ 0., 0., 1., 0.])), ('RPE5W27', ': ', array([ 0, 0, 51, 1]), ' ', array([ 0. , 0. , 0.9807…	1000000000000	0.992462	0.188406	0.999775	0
688	7	132153895	AAAxAAA	A	G	[('RPE5W22', ': ', array([64, 0, 0, 17]), ' ', array([ 0.79012346, 0. , 0. , 0.20987654]), ' ', array([ 1., 0., 0., 1.])), ('RPE5W23', ': ', array([47, 0, 0, 0]), ' ', array([ 1., 0., 0., 0.]), ' ', array([ 1., 0., 0., 0.])), ('RPE5W24', ': ', array([48, 0, 0, 2]), ' ', array([ 0.96, 0. , 0. , 0.04]), ' ', array([ 1., 0., 0., 0.])), ('RPE5W27', ': ', array([42, 0, 1, 0]), ' ', array([ 0.97674419,…	1000000000000	0.987286	0.209877	0.999671	0
689	8	4727530	TCCxTTT	G	T	[('RPE5W22', ': ', array([ 0, 22, 0, 42]), ' ', array([ 0. , 0.34375, 0. , 0.65625]), ' ', array([ 0., 1., 0., 1.])), ('RPE5W23', ': ', array([ 1, 0, 0, 42]), ' ', array([ 0.02325581, 0. , 0. , 0.97674419]), ' ', array([ 0., 0., 0., 1.])), ('RPE5W24', ': ', array([ 0, 0, 0, 43]), ' ', array([ 0., 0., 0., 1.]), ' ', array([ 0., 0., 0., 1.])), ('RPE5W27', ': ', array([ 0, 0, 0, 43]), ' ', array([ 0…	1000000000000	0.995131	0.34375	0.999998	0
690	8	33542192	AGAxTTT	G	A	[('RPE5W22', ': ', array([13, 0, 0, 44]), ' ', array([ 0.22807018, 0. , 0. , 0.77192982]), ' ', array([ 1., 0., 0., 1.])), ('RPE5W23', ': ', array([ 0, 1, 1, 28]), ' ', array([ 0. , 0.03333333, 0.03333333, 0.93333333]), ' ', array([ 0., 0., 0., 1.])), ('RPE5W24', ': ', array([ 0, 0, 0, 31]), ' ', array([ 0., 0., 0., 1.]), ' ', array([ 0., 0., 0., 1.])), ('RPE5W27', ': ', array([ 0, 0, 0, 22]), ' …	1000000000000	1	0.22807	0.994944	0
691	8	43334491	AGAxTTG	T	G	[('RPE5W22', ': ', array([ 0, 42, 0, 9]), ' ', array([ 0. , 0.82352941, 0. , 0.17647059]), ' ', array([ 0., 1., 0., 0.])), ('RPE5W23', ': ', array([ 0, 35, 0, 0]), ' ', array([ 0., 1., 0., 0.]), ' ', array([ 0., 1., 0., 0.])), ('RPE5W24', ': ', array([ 0, 37, 0, 0]), ' ', array([ 0., 1., 0., 0.]), ' ', array([ 0., 1., 0., 0.])), ('RPE5W27', ': ', array([ 0, 42, 0, 0]), ' ', array([ 0., 1., 0., 0.…	1000000000000	0.995735	0.176471	0.996378	0
692	8	74757311	AGCxGCA	T	C	[('RPE5W22', ': ', array([ 0, 30, 31, 1]), ' ', array([ 0. , 0.48387097, 0.5 , 0.01612903]), ' ', array([ 0., 1., 1., 0.])), ('RPE5W23', ': ', array([ 0, 30, 2, 0]), ' ', array([ 0. , 0.9375, 0.0625, 0. ]), ' ', array([ 0., 1., 0., 0.])), ('RPE5W24', ': ', array([ 0, 26, 5, 0]), ' ', array([ 0. , 0.83870968, 0.16129032, 0. ]), ' ', array([ 0., 1., 0., 0.])), ('RPE5W27', ': ', array([ 1, 25, 4, 0]…	1000000000000	0.908523	0.5	0.999901	0
693	8	74757314	TGCxCCA	A	C	[('RPE5W22', ': ', array([31, 0, 29, 1]), ' ', array([ 0.50819672, 0. , 0.47540984, 0.01639344]), ' ', array([ 1., 0., 1., 0.])), ('RPE5W23', ': ', array([31, 0, 2, 0]), ' ', array([ 0.93939394, 0. , 0.06060606, 0. ]), ' ', array([ 1., 0., 0., 0.])), ('RPE5W24', ': ', array([29, 0, 2, 0]), ' ', array([ 0.93548387, 0. , 0.06451613, 0. ]), ' ', array([ 1., 0., 0., 0.])), ('RPE5W27', ': ', array([27…	1000000000000	0.939508	0.47541	0.99963	0
694	8	96890762	TGAxATT	G	T	[('RPE5W22', ': ', array([ 0, 13, 0, 27]), ' ', array([ 0. , 0.325, 0. , 0.675]), ' ', array([ 0., 1., 0., 1.])), ('RPE5W23', ': ', array([ 0, 0, 0, 44]), ' ', array([ 0., 0., 0., 1.]), ' ', array([ 0., 0., 0., 1.])), ('RPE5W24', ': ', array([ 0, 0, 0, 28]), ' ', array([ 0., 0., 0., 1.]), ' ', array([ 0., 0., 0., 1.])), ('RPE5W27', ': ', array([ 0, 0, 0, 33]), ' ', array([ 0., 0., 0., 1.]), ' ', …	1000000000000	0.99449	0.325	0.999521	0
695	8	143254331	AACxAGC	C	A	[('RPE5W22', ': ', array([ 9, 0, 41, 1]), ' ', array([ 0.17647059, 0. , 0.80392157, 0.01960784]), ' ', array([ 0., 0., 1., 0.])), ('RPE5W23', ': ', array([ 1, 0, 40, 0]), ' ', array([ 0.02439024, 0. , 0.97560976, 0. ]), ' ', array([ 0., 0., 1., 0.])), ('RPE5W24', ': ', array([ 0, 0, 48, 0]), ' ', array([ 0., 0., 1., 0.]), ' ', array([ 0., 0., 1., 0.])), ('RPE5W27', ': ', array([ 0, 0, 35, 0]), ' …	1000000000000	0.993763	0.176471	0.993074	0
696	9	83312163	CAAxCTC	C	A	[('RPE5W22', ': ', array([10, 1, 33, 0]), ' ', array([ 0.22727273, 0.02272727, 0.75 , 0. ]), ' ', array([ 1., 0., 1., 0.])), ('RPE5W23', ': ', array([ 1, 0, 34, 0]), ' ', array([ 0.02857143, 0. , 0.97142857, 0. ]), ' ', array([ 0., 0., 1., 0.])), ('RPE5W24', ': ', array([ 0, 0, 49, 0]), ' ', array([ 0., 0., 1., 0.]), ' ', array([ 0., 0., 1., 0.])), ('RPE5W27', ': ', array([ 1, 0, 40, 0]), ' ', ar…	1000000000000	0.995565	0.227273	0.999757	0
697	11	56294508	CATxAGT	C	T	[('RPE5W22', ': ', array([ 0, 22, 54, 0]), ' ', array([ 0. , 0.28947368, 0.71052632, 0. ]), ' ', array([ 0., 1., 1., 0.])), ('RPE5W23', ': ', array([ 0, 0, 46, 0]), ' ', array([ 0., 0., 1., 0.]), ' ', array([ 0., 0., 1., 0.])), ('RPE5W24', ': ', array([ 0, 0, 38, 0]), ' ', array([ 0., 0., 1., 0.]), ' ', array([ 0., 0., 1., 0.])), ('RPE5W27', ': ', array([ 0, 0, 55, 0]), ' ', array([ 0., 0., 1., 0…	1000000000000	0.995443	0.289474	1	0
698	11	93929163	ACTxCAA	A	G	[('RPE5W22', ': ', array([58, 0, 0, 24]), ' ', array([ 0.70731707, 0. , 0. , 0.29268293]), ' ', array([ 1., 0., 0., 1.])), ('RPE5W23', ': ', array([52, 0, 0, 0]), ' ', array([ 1., 0., 0., 0.]), ' ', array([ 1., 0., 0., 0.])), ('RPE5W24', ': ', array([61, 0, 0, 0]), ' ', array([ 1., 0., 0., 0.]), ' ', array([ 1., 0., 0., 0.])), ('RPE5W27', ': ', array([49, 0, 0, 0]), ' ', array([ 1., 0., 0., 0.]),…	1000000000000	0.998182	0.292683	1	0
699	12	37919067	AAAxAAT	G	T	[('RPE5W22', ': ', array([ 0, 13, 0, 74]), ' ', array([ 0. , 0.14942529, 0. , 0.85057471]), ' ', array([ 0., 0., 0., 1.])), ('RPE5W23', ': ', array([ 0, 0, 0, 73]), ' ', array([ 0., 0., 0., 1.]), ' ', array([ 0., 0., 0., 1.])), ('RPE5W24', ': ', array([ 0, 0, 0, 55]), ' ', array([ 0., 0., 0., 1.]), ' ', array([ 0., 0., 0., 1.])), ('RPE5W27', ': ', array([ 0, 2, 0, 68]), ' ', array([ 0. , 0.028571…	1000000000000	0.989177	0.149425	0.998384	0
700	12	70468985	TATxCAG	G	A	[('RPE5W22', ': ', array([12, 0, 0, 59]), ' ', array([ 0.16901408, 0. , 0. , 0.83098592]), ' ', array([ 0., 0., 0., 1.])), ('RPE5W23', ': ', array([ 0, 1, 0, 47]), ' ', array([ 0. , 0.02083333, 0. , 0.97916667]), ' ', array([ 0., 0., 0., 1.])), ('RPE5W24', ': ', array([ 0, 0, 0, 49]), ' ', array([ 0., 0., 0., 1.]), ' ', array([ 0., 0., 0., 1.])), ('RPE5W27', ': ', array([ 0, 0, 0, 35]), ' ', arra…	1000000000000	0.997886	0.169014	0.998609	0
701	12	112975720	TTCxTTC	C	T	[('RPE5W22', ': ', array([ 0, 7, 48, 0]), ' ', array([ 0. , 0.12727273, 0.87272727, 0. ]), ' ', array([ 0., 0., 1., 0.])), ('RPE5W23', ': ', array([ 0, 1, 31, 0]), ' ', array([ 0. , 0.03125, 0.96875, 0. ]), ' ', array([ 0., 0., 1., 0.])), ('RPE5W24', ': ', array([ 0, 1, 37, 0]), ' ', array([ 0. , 0.02631579, 0.97368421, 0. ]), ' ', array([ 0., 0., 1., 0.])), ('RPE5W27', ': ', array([ 0, 5, 48, 0]…	10	0.929845	0.346154	0.999323	0
702	12	131911720	AAGxAAA	G	T	[('RPE5W22', ': ', array([ 0, 12, 0, 50]), ' ', array([ 0. , 0.19354839, 0. , 0.80645161]), ' ', array([ 0., 0., 0., 1.])), ('RPE5W23', ': ', array([ 0, 0, 0, 52]), ' ', array([ 0., 0., 0., 1.]), ' ', array([ 0., 0., 0., 1.])), ('RPE5W24', ': ', array([ 0, 0, 0, 48]), ' ', array([ 0., 0., 0., 1.]), ' ', array([ 0., 0., 0., 1.])), ('RPE5W27', ': ', array([ 0, 0, 0, 50]), ' ', array([ 0., 0., 0., 1…	1000000000000	0.991801	0.193548	0.997336	0
703	14	48781401	GTTxTAC	G	T	[('RPE5W22', ': ', array([ 1, 18, 1, 24]), ' ', array([ 0.02272727, 0.40909091, 0.02272727, 0.54545455]), ' ', array([ 0., 1., 0., 1.])), ('RPE5W23', ': ', array([ 0, 0, 0, 53]), ' ', array([ 0., 0., 0., 1.]), ' ', array([ 0., 0., 0., 1.])), ('RPE5W24', ': ', array([ 0, 0, 0, 43]), ' ', array([ 0., 0., 0., 1.]), ' ', array([ 0., 0., 0., 1.])), ('RPE5W27', ': ', array([ 0, 0, 0, 38]), ' ', array([…	1000000000000	0.997326	0.409091	1	0
704	14	74228999	CTTxAGG	C	A	[('RPE5W22', ': ', array([19, 0, 20, 0]), ' ', array([ 0.48717949, 0. , 0.51282051, 0. ]), ' ', array([ 1., 0., 1., 0.])), ('RPE5W23', ': ', array([ 1, 0, 29, 0]), ' ', array([ 0.03333333, 0. , 0.96666667, 0. ]), ' ', array([ 0., 0., 1., 0.])), ('RPE5W24', ': ', array([ 1, 0, 39, 0]), ' ', array([ 0.025, 0. , 0.975, 0. ]), ' ', array([ 0., 0., 1., 0.])), ('RPE5W27', ': ', array([ 1, 0, 31, 0]), '…	1000000000000	0.987444	0.487179	1	0
705	14	76354779	TTCxCTC	C	T	[('RPE5W22', ': ', array([ 0, 23, 51, 0]), ' ', array([ 0. , 0.31081081, 0.68918919, 0. ]), ' ', array([ 0., 1., 1., 0.])), ('RPE5W23', ': ', array([ 0, 0, 42, 0]), ' ', array([ 0., 0., 1., 0.]), ' ', array([ 0., 0., 1., 0.])), ('RPE5W24', ': ', array([ 0, 0, 28, 0]), ' ', array([ 0., 0., 1., 0.]), ' ', array([ 0., 0., 1., 0.])), ('RPE5W27', ': ', array([ 0, 0, 44, 0]), ' ', array([ 0., 0., 1., 0…	1000000000000	0.989007	0.310811	0.999781	0
706	15	39528460	GTGxCTC	C	T	[('RPE5W22', ': ', array([ 1, 26, 27, 0]), ' ', array([ 0.01851852, 0.48148148, 0.5 , 0. ]), ' ', array([ 0., 1., 1., 0.])), ('RPE5W23', ': ', array([ 0, 0, 33, 0]), ' ', array([ 0., 0., 1., 0.]), ' ', array([ 0., 0., 1., 0.])), ('RPE5W24', ': ', array([ 0, 0, 33, 0]), ' ', array([ 0., 0., 1., 0.]), ' ', array([ 0., 0., 1., 0.])), ('RPE5W27', ': ', array([ 0, 0, 46, 0]), ' ', array([ 0., 0., 1., …	1000000000000	0.997608	0.481481	1	0
707	16	12949306	AAAxAAA	A	G	[('RPE5W22', ': ', array([37, 0, 0, 12]), ' ', array([ 0.75510204, 0. , 0. , 0.24489796]), ' ', array([ 1., 0., 0., 1.])), ('RPE5W23', ': ', array([38, 0, 0, 3]), ' ', array([ 0.92682927, 0. , 0. , 0.07317073]), ' ', array([ 1., 0., 0., 0.])), ('RPE5W24', ': ', array([38, 0, 0, 0]), ' ', array([ 1., 0., 0., 0.]), ' ', array([ 1., 0., 0., 0.])), ('RPE5W27', ': ', array([50, 0, 1, 3]), ' ', array([…	1000000000000	0.983549	0.244898	0.991051	0
708	16	22692656	TCGxAGG	G	T	[('RPE5W22', ': ', array([ 0, 11, 0, 109]), ' ', array([ 0. , 0.09166667, 0. , 0.90833333]), ' ', array([ 0., 0., 0., 1.])), ('RPE5W23', ': ', array([ 0, 0, 0, 73]), ' ', array([ 0., 0., 0., 1.]), ' ', array([ 0., 0., 0., 1.])), ('RPE5W24', ': ', array([ 0, 0, 0, 97]), ' ', array([ 0., 0., 0., 1.]), ' ', array([ 0., 0., 0., 1.])), ('RPE5W27', ': ', array([ 0, 0, 2, 106]), ' ', array([ 0. , 0. , 0…	1000000000000	0.995503	0.0916667	0.999423	0
709	16	65449828	AAGxGGA	G	T	[('RPE5W22', ': ', array([ 0, 13, 0, 55]), ' ', array([ 0. , 0.19117647, 0. , 0.80882353]), ' ', array([ 0., 0., 0., 1.])), ('RPE5W23', ': ', array([ 0, 0, 0, 41]), ' ', array([ 0., 0., 0., 1.]), ' ', array([ 0., 0., 0., 1.])), ('RPE5W24', ': ', array([ 0, 0, 0, 53]), ' ', array([ 0., 0., 0., 1.]), ' ', array([ 0., 0., 0., 1.])), ('RPE5W27', ': ', array([ 0, 1, 0, 45]), ' ', array([ 0. , 0.021739…	1000000000000	0.994155	0.191176	0.999773	0
710	16	65795291	TCCxCAG	T	C	[('RPE5W22', ': ', array([ 0, 73, 14, 0]), ' ', array([ 0. , 0.83908046, 0.16091954, 0. ]), ' ', array([ 0., 1., 0., 0.])), ('RPE5W23', ': ', array([ 0, 50, 0, 0]), ' ', array([ 0., 1., 0., 0.]), ' ', array([ 0., 1., 0., 0.])), ('RPE5W24', ': ', array([ 0, 52, 0, 0]), ' ', array([ 0., 1., 0., 0.]), ' ', array([ 0., 1., 0., 0.])), ('RPE5W27', ': ', array([ 0, 50, 0, 0]), ' ', array([ 0., 1., 0., 0…	1000000000000	0.997669	0.16092	0.990657	0
711	16	76341654	TGGxCTT	A	T	[('RPE5W22', ': ', array([41, 26, 0, 0]), ' ', array([ 0.6119403, 0.3880597, 0. , 0. ]), ' ', array([ 1., 1., 0., 0.])), ('RPE5W23', ': ', array([51, 0, 1, 0]), ' ', array([ 0.98076923, 0. , 0.01923077, 0. ]), ' ', array([ 1., 0., 0., 0.])), ('RPE5W24', ': ', array([54, 0, 4, 0]), ' ', array([ 0.93103448, 0. , 0.06896552, 0. ]), ' ', array([ 1., 0., 0., 0.])), ('RPE5W27', ': ', array([58, 0, 0, 0…	1000000000000	0.986158	0.38806	1	0
712	17	28480109	TATxTTT	T	G	[('RPE5W22', ': ', array([ 0, 34, 1, 17]), ' ', array([ 0. , 0.65384615, 0.01923077, 0.32692308]), ' ', array([ 0., 1., 0., 1.])), ('RPE5W23', ': ', array([ 0, 27, 0, 0]), ' ', array([ 0., 1., 0., 0.]), ' ', array([ 0., 1., 0., 0.])), ('RPE5W24', ': ', array([ 0, 22, 0, 0]), ' ', array([ 0., 1., 0., 0.]), ' ', array([ 0., 1., 0., 0.])), ('RPE5W27', ': ', array([ 0, 34, 1, 0]), ' ', array([ 0. , 0…	1000000000000	0.990136	0.326923	0.998736	0
713	17	39760999	TATxTAT	A	G	[('RPE5W22', ': ', array([24, 0, 0, 12]), ' ', array([ 0.66666667, 0. , 0. , 0.33333333]), ' ', array([ 1., 0., 0., 1.])), ('RPE5W23', ': ', array([34, 0, 0, 0]), ' ', array([ 1., 0., 0., 0.]), ' ', array([ 1., 0., 0., 0.])), ('RPE5W24', ': ', array([21, 0, 0, 0]), ' ', array([ 1., 0., 0., 0.]), ' ', array([ 1., 0., 0., 0.])), ('RPE5W27', ': ', array([21, 0, 0, 0]), ' ', array([ 1., 0., 0., 0.]),…	1000000000000	0.987433	0.333333	0.996098	0
714	17	71751117	TTTxGGA	G	A	[('RPE5W22', ': ', array([17, 0, 0, 33]), ' ', array([ 0.34, 0. , 0. , 0.66]), ' ', array([ 1., 0., 0., 1.])), ('RPE5W23', ': ', array([ 0, 0, 0, 44]), ' ', array([ 0., 0., 0., 1.]), ' ', array([ 0., 0., 0., 1.])), ('RPE5W24', ': ', array([ 0, 0, 0, 39]), ' ', array([ 0., 0., 0., 1.]), ' ', array([ 0., 0., 0., 1.])), ('RPE5W27', ': ', array([ 0, 0, 0, 42]), ' ', array([ 0., 0., 0., 1.]), ' ', arr…	1000000000000	0.99526	0.34	0.999998	0
715	19	52884416	GGCxTAT	T	G	[('RPE5W22', ': ', array([ 0, 55, 0, 12]), ' ', array([ 0. , 0.82089552, 0. , 0.17910448]), ' ', array([ 0., 1., 0., 0.])), ('RPE5W23', ': ', array([ 0, 39, 0, 0]), ' ', array([ 0., 1., 0., 0.]), ' ', array([ 0., 1., 0., 0.])), ('RPE5W24', ': ', array([ 0, 36, 0, 0]), ' ', array([ 0., 1., 0., 0.]), ' ', array([ 0., 1., 0., 0.])), ('RPE5W27', ': ', array([ 0, 30, 1, 0]), ' ', array([ 0. , 0.967741…	1000000000000	0.99447	0.179104	0.992717	0
716	22	23348434	GCTxTCC	A	G	[('RPE5W22', ': ', array([15, 0, 1, 24]), ' ', array([ 0.375, 0. , 0.025, 0.6 ]), ' ', array([ 1., 0., 0., 1.])), ('RPE5W23', ': ', array([27, 0, 0, 0]), ' ', array([ 1., 0., 0., 0.]), ' ', array([ 1., 0., 0., 0.])), ('RPE5W24', ': ', array([31, 0, 0, 0]), ' ', array([ 1., 0., 0., 0.]), ' ', array([ 1., 0., 0., 0.])), ('RPE5W27', ': ', array([27, 0, 0, 0]), ' ', array([ 1., 0., 0., 0.]), ' ', arr…	1000000000000	1	0.6	1	0
717	X	91925640	CCAxAAT	G	T	[('RPE5W22', ': ', array([ 0, 19, 0, 33]), ' ', array([ 0. , 0.36538462, 0. , 0.63461538]), ' ', array([ 0., 1., 0., 1.])), ('RPE5W23', ': ', array([ 0, 0, 0, 50]), ' ', array([ 0., 0., 0., 1.]), ' ', array([ 0., 0., 0., 1.])), ('RPE5W24', ': ', array([ 0, 0, 0, 37]), ' ', array([ 0., 0., 0., 1.]), ' ', array([ 0., 0., 0., 1.])), ('RPE5W27', ': ', array([ 0, 0, 0, 36]), ' ', array([ 0., 0., 0., 1…	1000000000000	0.994191	0.365385	1	0
718	X	94833080	TTCxGAC	T	G	[('RPE5W22', ': ', array([ 0, 38, 0, 16]), ' ', array([ 0. , 0.7037037, 0. , 0.2962963]), ' ', array([ 0., 1., 0., 1.])), ('RPE5W23', ': ', array([ 0, 40, 1, 0]), ' ', array([ 0. , 0.97560976, 0.02439024, 0. ]), ' ', array([ 0., 1., 0., 0.])), ('RPE5W24', ': ', array([ 0, 48, 0, 0]), ' ', array([ 0., 1., 0., 0.]), ' ', array([ 0., 1., 0., 0.])), ('RPE5W27', ': ', array([ 0, 35, 0, 0]), ' ', array…	1000000000000	0.994652	0.296296	0.999992	0
719	X	116752015	CATxGGT	C	A	[('RPE5W22', ': ', array([19, 0, 36, 0]), ' ', array([ 0.34545455, 0. , 0.65454545, 0. ]), ' ', array([ 1., 0., 1., 0.])), ('RPE5W23', ': ', array([ 0, 0, 43, 0]), ' ', array([ 0., 0., 1., 0.]), ' ', array([ 0., 0., 1., 0.])), ('RPE5W24', ': ', array([ 0, 0, 43, 0]), ' ', array([ 0., 0., 1., 0.]), ' ', array([ 0., 0., 1., 0.])), ('RPE5W27', ': ', array([ 1, 0, 35, 0]), ' ', array([ 0.02777778, 0.…	1000000000000	0.997475	0.345455	0.999995	0
720	X	142544446	TAGxCTC	C	G	[('RPE5W22', ': ', array([ 0, 0, 35, 24]), ' ', array([ 0. , 0. , 0.59322034, 0.40677966]), ' ', array([ 0., 0., 1., 1.])), ('RPE5W23', ': ', array([ 0, 0, 30, 0]), ' ', array([ 0., 0., 1., 0.]), ' ', array([ 0., 0., 1., 0.])), ('RPE5W24', ': ', array([ 0, 0, 36, 0]), ' ', array([ 0., 0., 1., 0.]), ' ', array([ 0., 0., 1., 0.])), ('RPE5W27', ': ', array([ 0, 0, 33, 0]), ' ', array([ 0., 0., 1., 0…	1000000000000	0.995326	0.40678	1	0
721	1	149791180	GGCxTGG	G	A	[('RPE5W22', ': ', array([ 6, 0, 0, 32]), ' ', array([ 0.15789474, 0. , 0. , 0.84210526]), ' ', array([ 0., 0., 0., 1.])), ('RPE5W23', ': ', array([ 4, 0, 0, 30]), ' ', array([ 0.11764706, 0. , 0. , 0.88235294]), ' ', array([ 0., 0., 0., 1.])), ('RPE5W24', ': ', array([ 0, 0, 0, 24]), ' ', array([ 0., 0., 0., 1.]), ' ', array([ 0., 0., 0., 1.])), ('RPE5W27', ': ', array([ 3, 0, 0, 29]), ' ', arra…	1	0.906382	0.391304	0.99443	0
722	17	39760981	TATxTAT	A	G	[('RPE5W22', ': ', array([26, 0, 0, 18]), ' ', array([ 0.59090909, 0. , 0. , 0.40909091]), ' ', array([ 1., 0., 0., 1.])), ('RPE5W23', ': ', array([34, 0, 0, 1]), ' ', array([ 0.97142857, 0. , 0. , 0.02857143]), ' ', array([ 1., 0., 0., 0.])), ('RPE5W24', ': ', array([26, 0, 0, 0]), ' ', array([ 1., 0., 0., 0.]), ' ', array([ 1., 0., 0., 0.])), ('RPE5W27', ': ', array([20, 0, 0, 0]), ' ', array([…	1000000000000	0.985392	0.409091	0.999824	0
723	17	39760995	TATxTAT	A	G	[('RPE5W22', ': ', array([24, 0, 0, 14]), ' ', array([ 0.63157895, 0. , 0. , 0.36842105]), ' ', array([ 1., 0., 0., 1.])), ('RPE5W23', ': ', array([32, 0, 0, 1]), ' ', array([ 0.96969697, 0. , 0. , 0.03030303]), ' ', array([ 1., 0., 0., 0.])), ('RPE5W24', ': ', array([22, 0, 0, 0]), ' ', array([ 1., 0., 0., 0.]), ' ', array([ 1., 0., 0., 0.])), ('RPE5W27', ': ', array([20, 0, 0, 0]), ' ', array([…	1000000000000	0.982565	0.368421	0.990295	0
724	8	74757320	ATCxGGG	T	C	[('RPE5W22', ': ', array([ 0, 34, 28, 0]), ' ', array([ 0. , 0.5483871, 0.4516129, 0. ]), ' ', array([ 0., 1., 1., 0.])), ('RPE5W23', ': ', array([ 0, 33, 1, 0]), ' ', array([ 0. , 0.97058824, 0.02941176, 0. ]), ' ', array([ 0., 1., 0., 0.])), ('RPE5W24', ': ', array([ 0, 32, 2, 0]), ' ', array([ 0. , 0.94117647, 0.05882353, 0. ]), ' ', array([ 0., 1., 0., 0.])), ('RPE5W27', ': ', array([ 1, 30, …	1000000000000	0.945739	0.451613	0.999814	0
725	GL000192.1	185879	CTGxCCA	G	A	[('RPE5W22', ': ', array([ 8, 1, 0, 69]), ' ', array([ 0.1025641 , 0.01282051, 0. , 0.88461538]), ' ', array([ 0., 0., 0., 1.])), ('RPE5W23', ': ', array([ 6, 0, 0, 32]), ' ', array([ 0.15789474, 0. , 0. , 0.84210526]), ' ', array([ 0., 0., 0., 1.])), ('RPE5W24', ': ', array([ 6, 0, 0, 53]), ' ', array([ 0.10169492, 0. , 0. , 0.89830508]), ' ', array([ 0., 0., 0., 1.])), ('RPE5W27', ': ', array([…	100000	0.922455	0.357143	0.991339	0
726	16	70154328	AGTxGAA	A	T	[('RPE5W22', ': ', array([73, 6, 2, 0]), ' ', array([ 0.90123457, 0.07407407, 0.02469136, 0. ]), ' ', array([ 1., 0., 0., 0.])), ('RPE5W23', ': ', array([62, 6, 0, 0]), ' ', array([ 0.91176471, 0.08823529, 0. , 0. ]), ' ', array([ 1., 0., 0., 0.])), ('RPE5W24', ': ', array([65, 3, 0, 0]), ' ', array([ 0.95588235, 0.04411765, 0. , 0. ]), ' ', array([ 1., 0., 0., 0.])), ('RPE5W27', ': ', array([54,…	100	0.938132	0.217391	0.994653	0
727	4	178442374	AAAxATA	A	T	[('RPE5W22', ': ', array([47, 5, 1, 0]), ' ', array([ 0.88679245, 0.09433962, 0.01886792, 0. ]), ' ', array([ 1., 0., 0., 0.])), ('RPE5W23', ': ', array([25, 3, 0, 0]), ' ', array([ 0.89285714, 0.10714286, 0. , 0. ]), ' ', array([ 1., 0., 0., 0.])), ('RPE5W24', ': ', array([20, 2, 1, 0]), ' ', array([ 0.86956522, 0.08695652, 0.04347826, 0. ]), ' ', array([ 1., 0., 0., 0.])), ('RPE5W27', ': ', arr…	1000000000	0.920839	0.36	0.995744	0
728	5	30426049	GAAxGAA	G	A	[('RPE5W22', ': ', array([11, 0, 0, 82]), ' ', array([ 0.11827957, 0. , 0. , 0.88172043]), ' ', array([ 0., 0., 0., 1.])), ('RPE5W23', ': ', array([ 7, 0, 0, 65]), ' ', array([ 0.09722222, 0. , 0. , 0.90277778]), ' ', array([ 0., 0., 0., 1.])), ('RPE5W24', ': ', array([ 5, 0, 0, 67]), ' ', array([ 0.06944444, 0. , 0. , 0.93055556]), ' ', array([ 0., 0., 0., 1.])), ('RPE5W27', ': ', array([17, 0, …	1000000000	0.924248	0.226667	0.995693	0
729	10	84639247	TTTxAGA	G	T	[('RPE5W22', ': ', array([ 0, 8, 0, 35]), ' ', array([ 0. , 0.18604651, 0. , 0.81395349]), ' ', array([ 0., 0., 0., 1.])), ('RPE5W23', ': ', array([ 0, 2, 0, 29]), ' ', array([ 0. , 0.06451613, 0. , 0.93548387]), ' ', array([ 0., 0., 0., 1.])), ('RPE5W24', ': ', array([ 0, 7, 0, 35]), ' ', array([ 0. , 0.16666667, 0. , 0.83333333]), ' ', array([ 0., 0., 0., 1.])), ('RPE5W27', ': ', array([ 0, 3, …	100	0.885692	0.394737	0.998189	0
730	13	48504957	AAAxAGA	T	A	[('RPE5W22', ': ', array([15, 35, 0, 4]), ' ', array([ 0.27777778, 0.64814815, 0. , 0.07407407]), ' ', array([ 1., 1., 0., 0.])), ('RPE5W23', ': ', array([ 6, 28, 0, 2]), ' ', array([ 0.16666667, 0.77777778, 0. , 0.05555556]), ' ', array([ 0., 1., 0., 0.])), ('RPE5W24', ': ', array([ 6, 21, 1, 1]), ' ', array([ 0.20689655, 0.72413793, 0.03448276, 0.03448276]), ' ', array([ 1., 1., 0., 0.])), ('RP…	1000000000	0.765754	0.478261	0.995531	0
731	1	146245022	AAGxTTT	A	G	[('RPE5W22', ': ', array([21, 0, 0, 7]), ' ', array([ 0.75, 0. , 0. , 0.25]), ' ', array([ 1., 0., 0., 1.])), ('RPE5W23', ': ', array([16, 0, 0, 2]), ' ', array([ 0.88888889, 0. , 0. , 0.11111111]), ' ', array([ 1., 0., 0., 0.])), ('RPE5W24', ': ', array([16, 0, 1, 2]), ' ', array([ 0.84210526, 0. , 0.05263158, 0.10526316]), ' ', array([ 1., 0., 0., 0.])), ('RPE5W27', ': ', array([16, 0, 0, 3]), …	10	0.838165	0.571429	0.992151	0
732	5	118941267	AACxATC	C	T	[('RPE5W22', ': ', array([ 0, 8, 54, 0]), ' ', array([ 0. , 0.12903226, 0.87096774, 0. ]), ' ', array([ 0., 0., 1., 0.])), ('RPE5W23', ': ', array([ 0, 3, 41, 0]), ' ', array([ 0. , 0.06818182, 0.93181818, 0. ]), ' ', array([ 0., 0., 1., 0.])), ('RPE5W24', ': ', array([ 1, 4, 46, 1]), ' ', array([ 0.01923077, 0.07692308, 0.88461538, 0.01923077]), ' ', array([ 0., 0., 1., 0.])), ('RPE5W27', ': ', …	100000	0.906047	0.285714	0.999102	0
733	1	8179630	GCCxAGG	C	A	[('RPE5W22', ': ', array([ 0, 0, 46, 0]), ' ', array([ 0., 0., 1., 0.]), ' ', array([ 0., 0., 1., 0.])), ('RPE5W23', ': ', array([10, 0, 17, 0]), ' ', array([ 0.37037037, 0. , 0.62962963, 0. ]), ' ', array([ 1., 0., 1., 0.])), ('RPE5W24', ': ', array([ 0, 0, 44, 0]), ' ', array([ 0., 0., 1., 0.]), ' ', array([ 0., 0., 1., 0.])), ('RPE5W27', ': ', array([ 0, 0, 33, 0]), ' ', array([ 0., 0., 1., 0.…	100000000000	0.982188		1	0
734	1	89590978	CATxCCT	C	A	[('RPE5W22', ': ', array([ 0, 0, 53, 0]), ' ', array([ 0., 0., 1., 0.]), ' ', array([ 0., 0., 1., 0.])), ('RPE5W23', ': ', array([11, 0, 39, 0]), ' ', array([ 0.22, 0. , 0.78, 0. ]), ' ', array([ 1., 0., 1., 0.])), ('RPE5W24', ': ', array([ 0, 1, 30, 0]), ' ', array([ 0. , 0.03225806, 0.96774194, 0. ]), ' ', array([ 0., 0., 1., 0.])), ('RPE5W27', ': ', array([ 0, 0, 40, 0]), ' ', array([ 0., 0., …	100000000000	0.997312		0.999413	0
735	1	178997382	CATxACA	A	T	[('RPE5W22', ': ', array([53, 1, 1, 0]), ' ', array([ 0.96363636, 0.01818182, 0.01818182, 0. ]), ' ', array([ 1., 0., 0., 0.])), ('RPE5W23', ': ', array([32, 6, 0, 0]), ' ', array([ 0.84210526, 0.15789474, 0. , 0. ]), ' ', array([ 1., 0., 0., 0.])), ('RPE5W24', ': ', array([41, 0, 1, 0]), ' ', array([ 0.97619048, 0. , 0.02380952, 0. ]), ' ', array([ 1., 0., 0., 0.])), ('RPE5W27', ': ', array([36,…	100000000000	0.992849		0.992702	0
736	1	217100523	CTAxGTA	A	G	[('RPE5W22', ': ', array([44, 1, 0, 0]), ' ', array([ 0.97777778, 0.02222222, 0. , 0. ]), ' ', array([ 1., 0., 0., 0.])), ('RPE5W23', ': ', array([27, 0, 0, 7]), ' ', array([ 0.79411765, 0. , 0. , 0.20588235]), ' ', array([ 1., 0., 0., 1.])), ('RPE5W24', ': ', array([29, 0, 0, 0]), ' ', array([ 1., 0., 0., 0.]), ' ', array([ 1., 0., 0., 0.])), ('RPE5W27', ': ', array([47, 0, 1, 0]), ' ', array([ …	100000000000	0.996412		0.994188	0
737	2	29735219	AATxAAT	C	A	[('RPE5W22', ': ', array([ 0, 0, 49, 0]), ' ', array([ 0., 0., 1., 0.]), ' ', array([ 0., 0., 1., 0.])), ('RPE5W23', ': ', array([ 7, 0, 27, 0]), ' ', array([ 0.20588235, 0. , 0.79411765, 0. ]), ' ', array([ 1., 0., 1., 0.])), ('RPE5W24', ': ', array([ 0, 0, 47, 0]), ' ', array([ 0., 0., 1., 0.]), ' ', array([ 0., 0., 1., 0.])), ('RPE5W27', ': ', array([ 0, 0, 25, 1]), ' ', array([ 0. , 0. , 0.96…	100000000000	0.996795		0.99153	0
738	2	89986834	CCGxCCT	G	C	[('RPE5W22', ': ', array([ 0, 0, 0, 50]), ' ', array([ 0., 0., 0., 1.]), ' ', array([ 0., 0., 0., 1.])), ('RPE5W23', ': ', array([ 0, 0, 16, 35]), ' ', array([ 0. , 0. , 0.31372549, 0.68627451]), ' ', array([ 0., 0., 1., 1.])), ('RPE5W24', ': ', array([ 0, 0, 0, 32]), ' ', array([ 0., 0., 0., 1.]), ' ', array([ 0., 0., 0., 1.])), ('RPE5W27', ': ', array([ 0, 0, 0, 35]), ' ', array([ 0., 0., 0., 1…	100000000000	0.992919		0.999971	0
739	2	141915120	ATAxAAA	A	C	[('RPE5W22', ': ', array([61, 0, 0, 0]), ' ', array([ 1., 0., 0., 0.]), ' ', array([ 1., 0., 0., 0.])), ('RPE5W23', ': ', array([27, 0, 5, 0]), ' ', array([ 0.84375, 0. , 0.15625, 0. ]), ' ', array([ 1., 0., 0., 0.])), ('RPE5W24', ': ', array([28, 0, 0, 0]), ' ', array([ 1., 0., 0., 0.]), ' ', array([ 1., 0., 0., 0.])), ('RPE5W27', ': ', array([36, 0, 0, 0]), ' ', array([ 1., 0., 0., 0.]), ' ', a…	100000000000	0.995762		0.991558	0
740	2	192654058	AATxGAA	T	C	[('RPE5W22', ': ', array([ 0, 57, 0, 0]), ' ', array([ 0., 1., 0., 0.]), ' ', array([ 0., 1., 0., 0.])), ('RPE5W23', ': ', array([ 0, 27, 14, 0]), ' ', array([ 0. , 0.65853659, 0.34146341, 0. ]), ' ', array([ 0., 1., 1., 0.])), ('RPE5W24', ': ', array([ 0, 40, 0, 0]), ' ', array([ 0., 1., 0., 0.]), ' ', array([ 0., 1., 0., 0.])), ('RPE5W27', ': ', array([ 0, 38, 1, 1]), ' ', array([ 0. , 0.95 , 0…	100000000000	0.986186		1	0
741	2	199687227	TTCxTAT	T	G	[('RPE5W22', ': ', array([ 0, 58, 0, 0]), ' ', array([ 0., 1., 0., 0.]), ' ', array([ 0., 1., 0., 0.])), ('RPE5W23', ': ', array([ 0, 29, 0, 11]), ' ', array([ 0. , 0.725, 0. , 0.275]), ' ', array([ 0., 1., 0., 1.])), ('RPE5W24', ': ', array([ 0, 40, 0, 0]), ' ', array([ 0., 1., 0., 0.]), ' ', array([ 0., 1., 0., 0.])), ('RPE5W27', ': ', array([ 0, 40, 0, 0]), ' ', array([ 0., 1., 0., 0.]), ' ', …	100000000000	0.991284		0.999952	0
742	2	200779376	TTAxCTA	C	A	[('RPE5W22', ': ', array([ 0, 0, 66, 0]), ' ', array([ 0., 0., 1., 0.]), ' ', array([ 0., 0., 1., 0.])), ('RPE5W23', ': ', array([10, 0, 24, 0]), ' ', array([ 0.29411765, 0. , 0.70588235, 0. ]), ' ', array([ 1., 0., 1., 0.])), ('RPE5W24', ': ', array([ 0, 0, 34, 0]), ' ', array([ 0., 0., 1., 0.]), ' ', array([ 0., 0., 1., 0.])), ('RPE5W27', ': ', array([ 0, 0, 37, 1]), ' ', array([ 0. , 0. , 0.97…	100000000000	0.997807		0.999994	0
743	3	73486879	TCTxATT	A	G	[('RPE5W22', ': ', array([51, 0, 0, 0]), ' ', array([ 1., 0., 0., 0.]), ' ', array([ 1., 0., 0., 0.])), ('RPE5W23', ': ', array([22, 0, 0, 12]), ' ', array([ 0.64705882, 0. , 0. , 0.35294118]), ' ', array([ 1., 0., 0., 1.])), ('RPE5W24', ': ', array([37, 0, 0, 0]), ' ', array([ 1., 0., 0., 0.]), ' ', array([ 1., 0., 0., 0.])), ('RPE5W27', ': ', array([37, 0, 0, 0]), ' ', array([ 1., 0., 0., 0.]),…	100000000000	0.994444		0.999999	0
744	3	106439457	TCCxTGG	A	G	[('RPE5W22', ': ', array([52, 0, 0, 0]), ' ', array([ 1., 0., 0., 0.]), ' ', array([ 1., 0., 0., 0.])), ('RPE5W23', ': ', array([18, 0, 1, 17]), ' ', array([ 0.5 , 0. , 0.02777778, 0.47222222]), ' ', array([ 1., 0., 0., 1.])), ('RPE5W24', ': ', array([46, 0, 0, 0]), ' ', array([ 1., 0., 0., 0.]), ' ', array([ 1., 0., 0., 0.])), ('RPE5W27', ': ', array([35, 0, 0, 0]), ' ', array([ 1., 0., 0., 0.])…	100000000000	0.991284		1	0
745	3	115822963	GTGxCCC	G	T	[('RPE5W22', ': ', array([ 0, 0, 0, 48]), ' ', array([ 0., 0., 0., 1.]), ' ', array([ 0., 0., 0., 1.])), ('RPE5W23', ': ', array([ 0, 8, 0, 24]), ' ', array([ 0. , 0.25, 0. , 0.75]), ' ', array([ 0., 1., 0., 1.])), ('RPE5W24', ': ', array([ 0, 0, 0, 37]), ' ', array([ 0., 0., 0., 1.]), ' ', array([ 0., 0., 0., 1.])), ('RPE5W27', ': ', array([ 0, 0, 0, 37]), ' ', array([ 0., 0., 0., 1.]), ' ', arr…	100000000000	0.988551		0.999239	0
746	3	138223944	AAAxAGA	T	C	[('RPE5W22', ': ', array([ 0, 46, 0, 0]), ' ', array([ 0., 1., 0., 0.]), ' ', array([ 0., 1., 0., 0.])), ('RPE5W23', ': ', array([ 0, 30, 11, 0]), ' ', array([ 0. , 0.73170732, 0.26829268, 0. ]), ' ', array([ 0., 1., 1., 0.])), ('RPE5W24', ': ', array([ 0, 46, 0, 0]), ' ', array([ 0., 1., 0., 0.]), ' ', array([ 0., 1., 0., 0.])), ('RPE5W27', ': ', array([ 0, 31, 0, 0]), ' ', array([ 0., 1., 0., 0…	100000000000	0.995259		0.999841	0
747	3	141484662	GAAxCAT	A	G	[('RPE5W22', ': ', array([37, 0, 0, 0]), ' ', array([ 1., 0., 0., 0.]), ' ', array([ 1., 0., 0., 0.])), ('RPE5W23', ': ', array([23, 0, 0, 12]), ' ', array([ 0.65714286, 0. , 0. , 0.34285714]), ' ', array([ 1., 0., 0., 1.])), ('RPE5W24', ': ', array([34, 0, 0, 0]), ' ', array([ 1., 0., 0., 0.]), ' ', array([ 1., 0., 0., 0.])), ('RPE5W27', ': ', array([37, 0, 2, 0]), ' ', array([ 0.94871795, 0. , …	100000000000	0.991701		0.999998	0
748	3	173504090	CCTxTGT	A	G	[('RPE5W22', ': ', array([51, 0, 0, 0]), ' ', array([ 1., 0., 0., 0.]), ' ', array([ 1., 0., 0., 0.])), ('RPE5W23', ': ', array([26, 0, 0, 9]), ' ', array([ 0.74285714, 0. , 0. , 0.25714286]), ' ', array([ 1., 0., 0., 1.])), ('RPE5W24', ': ', array([38, 0, 0, 0]), ' ', array([ 1., 0., 0., 0.]), ' ', array([ 1., 0., 0., 0.])), ('RPE5W27', ': ', array([36, 1, 0, 0]), ' ', array([ 0.97297297, 0.0270…	100000000000	0.988819		0.999149	0
749	4	64725803	ATAxATA	A	T	[('RPE5W22', ': ', array([44, 1, 1, 0]), ' ', array([ 0.95652174, 0.02173913, 0.02173913, 0. ]), ' ', array([ 1., 0., 0., 0.])), ('RPE5W23', ': ', array([30, 25, 0, 0]), ' ', array([ 0.54545455, 0.45454545, 0. , 0. ]), ' ', array([ 1., 1., 0., 0.])), ('RPE5W24', ': ', array([41, 1, 0, 0]), ' ', array([ 0.97619048, 0.02380952, 0. , 0. ]), ' ', array([ 1., 0., 0., 0.])), ('RPE5W27', ': ', array([39…	100000000000	0.972146		0.999949	0
750	4	69781894	ACCxAGC	C	T	[('RPE5W22', ': ', array([ 0, 0, 43, 0]), ' ', array([ 0., 0., 1., 0.]), ' ', array([ 0., 0., 1., 0.])), ('RPE5W23', ': ', array([ 0, 7, 31, 0]), ' ', array([ 0. , 0.18421053, 0.81578947, 0. ]), ' ', array([ 0., 0., 1., 0.])), ('RPE5W24', ': ', array([ 0, 0, 41, 0]), ' ', array([ 0., 0., 1., 0.]), ' ', array([ 0., 0., 1., 0.])), ('RPE5W27', ': ', array([ 0, 0, 32, 0]), ' ', array([ 0., 0., 1., 0.…	100000000000	1		0.994104	0
751	4	106921755	GGGxAAC	G	T	[('RPE5W22', ': ', array([ 0, 0, 1, 54]), ' ', array([ 0. , 0. , 0.01818182, 0.98181818]), ' ', array([ 0., 0., 0., 1.])), ('RPE5W23', ': ', array([ 0, 12, 0, 31]), ' ', array([ 0. , 0.27906977, 0. , 0.72093023]), ' ', array([ 0., 1., 0., 1.])), ('RPE5W24', ': ', array([ 0, 0, 0, 49]), ' ', array([ 0., 0., 0., 1.]), ' ', array([ 0., 0., 0., 1.])), ('RPE5W27', ': ', array([ 0, 1, 1, 45]), ' ', arr…	100000000000	0.983016		0.996697	0
752	4	165787052	TCTxCTA	T	A	[('RPE5W22', ': ', array([ 0, 46, 1, 0]), ' ', array([ 0. , 0.9787234, 0.0212766, 0. ]), ' ', array([ 0., 1., 0., 0.])), ('RPE5W23', ': ', array([10, 18, 0, 2]), ' ', array([ 0.33333333, 0.6 , 0. , 0.06666667]), ' ', array([ 1., 1., 0., 0.])), ('RPE5W24', ': ', array([ 0, 27, 0, 0]), ' ', array([ 0., 1., 0., 0.]), ' ', array([ 0., 1., 0., 0.])), ('RPE5W27', ': ', array([ 0, 36, 1, 0]), ' ', array…	100000000000	0.988476		1	0
753	4	190046165	ATTxAGT	C	A	[('RPE5W22', ': ', array([ 0, 0, 50, 1]), ' ', array([ 0. , 0. , 0.98039216, 0.01960784]), ' ', array([ 0., 0., 1., 0.])), ('RPE5W23', ': ', array([17, 0, 23, 0]), ' ', array([ 0.425, 0. , 0.575, 0. ]), ' ', array([ 1., 0., 1., 0.])), ('RPE5W24', ': ', array([ 0, 0, 52, 0]), ' ', array([ 0., 0., 1., 0.]), ' ', array([ 0., 0., 1., 0.])), ('RPE5W27', ': ', array([ 0, 0, 29, 0]), ' ', array([ 0., 0.…	100000000000	0.996051		1	0
754	5	100929014	ATAxACA	C	T	[('RPE5W22', ': ', array([ 0, 1, 78, 0]), ' ', array([ 0. , 0.01265823, 0.98734177, 0. ]), ' ', array([ 0., 0., 1., 0.])), ('RPE5W23', ': ', array([ 1, 8, 34, 0]), ' ', array([ 0.02325581, 0.18604651, 0.79069767, 0. ]), ' ', array([ 0., 0., 1., 0.])), ('RPE5W24', ': ', array([ 0, 0, 41, 0]), ' ', array([ 0., 0., 1., 0.]), ' ', array([ 0., 0., 1., 0.])), ('RPE5W27', ': ', array([ 0, 3, 53, 0]), ' …	100000000000	0.978294		0.997451	0
755	5	106257662	GCCxAGC	C	A	[('RPE5W22', ': ', array([ 1, 0, 58, 0]), ' ', array([ 0.01694915, 0. , 0.98305085, 0. ]), ' ', array([ 0., 0., 1., 0.])), ('RPE5W23', ': ', array([12, 0, 55, 0]), ' ', array([ 0.17910448, 0. , 0.82089552, 0. ]), ' ', array([ 0., 0., 1., 0.])), ('RPE5W24', ': ', array([ 0, 0, 47, 0]), ' ', array([ 0., 0., 1., 0.]), ' ', array([ 0., 0., 1., 0.])), ('RPE5W27', ': ', array([ 1, 0, 51, 0]), ' ', arra…	100000000000	0.991052		0.998158	0
756	5	128037896	CCTxTTG	C	G	[('RPE5W22', ': ', array([ 0, 0, 69, 0]), ' ', array([ 0., 0., 1., 0.]), ' ', array([ 0., 0., 1., 0.])), ('RPE5W23', ': ', array([ 0, 0, 52, 7]), ' ', array([ 0. , 0. , 0.88135593, 0.11864407]), ' ', array([ 0., 0., 1., 0.])), ('RPE5W24', ': ', array([ 0, 0, 64, 0]), ' ', array([ 0., 0., 1., 0.]), ' ', array([ 0., 0., 1., 0.])), ('RPE5W27', ': ', array([ 0, 0, 47, 0]), ' ', array([ 0., 0., 1., 0.…	100000000000	0.998485		0.994335	0
757	5	133505921	TAAxTTT	T	A	[('RPE5W22', ': ', array([ 0, 65, 1, 0]), ' ', array([ 0. , 0.98484848, 0.01515152, 0. ]), ' ', array([ 0., 1., 0., 0.])), ('RPE5W23', ': ', array([13, 36, 1, 0]), ' ', array([ 0.26, 0.72, 0.02, 0. ]), ' ', array([ 1., 1., 0., 0.])), ('RPE5W24', ': ', array([ 1, 56, 0, 1]), ' ', array([ 0.01724138, 0.96551724, 0. , 0.01724138]), ' ', array([ 0., 1., 0., 0.])), ('RPE5W27', ': ', array([ 2, 48, 0, …	100000000000	0.983078		1	0
758	5	134480321	TCAxCTT	T	C	[('RPE5W22', ': ', array([ 0, 71, 0, 0]), ' ', array([ 0., 1., 0., 0.]), ' ', array([ 0., 1., 0., 0.])), ('RPE5W23', ': ', array([ 0, 40, 14, 0]), ' ', array([ 0. , 0.74074074, 0.25925926, 0. ]), ' ', array([ 0., 1., 1., 0.])), ('RPE5W24', ': ', array([ 0, 51, 0, 0]), ' ', array([ 0., 1., 0., 0.]), ' ', array([ 0., 1., 0., 0.])), ('RPE5W27', ': ', array([ 0, 45, 0, 0]), ' ', array([ 0., 1., 0., 0…	100000000000	0.996576		0.999993	0
759	5	149076063	TTAxAAC	T	G	[('RPE5W22', ': ', array([ 1, 45, 0, 0]), ' ', array([ 0.02173913, 0.97826087, 0. , 0. ]), ' ', array([ 0., 1., 0., 0.])), ('RPE5W23', ': ', array([ 1, 26, 0, 25]), ' ', array([ 0.01923077, 0.5 , 0. , 0.48076923]), ' ', array([ 0., 1., 0., 1.])), ('RPE5W24', ': ', array([ 0, 39, 0, 0]), ' ', array([ 0., 1., 0., 0.]), ' ', array([ 0., 1., 0., 0.])), ('RPE5W27', ': ', array([ 0, 26, 0, 1]), ' ', ar…	100000000000	0.992016		1	0
760	5	162323098	TAAxGGG	G	A	[('RPE5W22', ': ', array([ 0, 0, 0, 60]), ' ', array([ 0., 0., 0., 1.]), ' ', array([ 0., 0., 0., 1.])), ('RPE5W23', ': ', array([ 7, 0, 0, 37]), ' ', array([ 0.15909091, 0. , 0. , 0.84090909]), ' ', array([ 0., 0., 0., 1.])), ('RPE5W24', ': ', array([ 0, 1, 0, 53]), ' ', array([ 0. , 0.01851852, 0. , 0.98148148]), ' ', array([ 0., 0., 0., 1.])), ('RPE5W27', ': ', array([ 0, 0, 0, 53]), ' ', arra…	100000000000	0.994985		0.998858	0
761	5	169557215	AATxTTT	C	A	[('RPE5W22', ': ', array([ 1, 0, 77, 0]), ' ', array([ 0.01282051, 0. , 0.98717949, 0. ]), ' ', array([ 0., 0., 1., 0.])), ('RPE5W23', ': ', array([13, 0, 36, 0]), ' ', array([ 0.26530612, 0. , 0.73469388, 0. ]), ' ', array([ 1., 0., 1., 0.])), ('RPE5W24', ': ', array([ 0, 0, 49, 0]), ' ', array([ 0., 0., 1., 0.]), ' ', array([ 0., 0., 1., 0.])), ('RPE5W27', ': ', array([ 0, 0, 63, 0]), ' ', arra…	100000000000	0.985801		0.994294	0
762	6	8865748	ATTxCAT	G	T	[('RPE5W22', ': ', array([ 1, 0, 0, 46]), ' ', array([ 0.0212766, 0. , 0. , 0.9787234]), ' ', array([ 0., 0., 0., 1.])), ('RPE5W23', ': ', array([ 1, 8, 0, 22]), ' ', array([ 0.03225806, 0.25806452, 0. , 0.70967742]), ' ', array([ 0., 1., 0., 1.])), ('RPE5W24', ': ', array([ 0, 0, 0, 38]), ' ', array([ 0., 0., 0., 1.]), ' ', array([ 0., 0., 0., 1.])), ('RPE5W27', ': ', array([ 0, 0, 0, 23]), ' ',…	100000000000	0.989117		0.995395	0
763	6	47721997	ATAxTCC	T	G	[('RPE5W22', ': ', array([ 0, 57, 0, 1]), ' ', array([ 0. , 0.98275862, 0. , 0.01724138]), ' ', array([ 0., 1., 0., 0.])), ('RPE5W23', ': ', array([ 1, 15, 1, 9]), ' ', array([ 0.03846154, 0.57692308, 0.03846154, 0.34615385]), ' ', array([ 0., 1., 0., 1.])), ('RPE5W24', ': ', array([ 0, 32, 0, 1]), ' ', array([ 0. , 0.96969697, 0. , 0.03030303]), ' ', array([ 0., 1., 0., 0.])), ('RPE5W27', ': ', …	100000000000	0.986543		1	0
764	6	121188494	AGTxAGC	G	T	[('RPE5W22', ': ', array([ 0, 0, 0, 62]), ' ', array([ 0., 0., 0., 1.]), ' ', array([ 0., 0., 0., 1.])), ('RPE5W23', ': ', array([ 0, 9, 1, 18]), ' ', array([ 0. , 0.32142857, 0.03571429, 0.64285714]), ' ', array([ 0., 1., 0., 1.])), ('RPE5W24', ': ', array([ 0, 0, 0, 38]), ' ', array([ 0., 0., 0., 1.]), ' ', array([ 0., 0., 0., 1.])), ('RPE5W27', ': ', array([ 0, 0, 0, 42]), ' ', array([ 0., 0.,…	100000000000	0.99213		0.999984	0
765	6	150442188	TTTxTTT	A	C	[('RPE5W22', ': ', array([50, 0, 1, 0]), ' ', array([ 0.98039216, 0. , 0.01960784, 0. ]), ' ', array([ 1., 0., 0., 0.])), ('RPE5W23', ': ', array([35, 0, 10, 0]), ' ', array([ 0.77777778, 0. , 0.22222222, 0. ]), ' ', array([ 1., 0., 1., 0.])), ('RPE5W24', ': ', array([39, 0, 0, 0]), ' ', array([ 1., 0., 0., 0.]), ' ', array([ 1., 0., 0., 0.])), ('RPE5W27', ': ', array([38, 0, 0, 0]), ' ', array([…	100000000000	0.996114		0.998482	0
766	7	8901166	ACAxCAT	A	T	[('RPE5W22', ': ', array([63, 1, 0, 1]), ' ', array([ 0.96923077, 0.01538462, 0. , 0.01538462]), ' ', array([ 1., 0., 0., 0.])), ('RPE5W23', ': ', array([41, 18, 0, 0]), ' ', array([ 0.69491525, 0.30508475, 0. , 0. ]), ' ', array([ 1., 1., 0., 0.])), ('RPE5W24', ': ', array([51, 0, 0, 0]), ' ', array([ 1., 0., 0., 0.]), ' ', array([ 1., 0., 0., 0.])), ('RPE5W27', ': ', array([50, 0, 1, 0]), ' ', …	100000000000	0.991972		1	0
767	7	14611497	CATxAGA	A	G	[('RPE5W22', ': ', array([70, 1, 1, 0]), ' ', array([ 0.97222222, 0.01388889, 0.01388889, 0. ]), ' ', array([ 1., 0., 0., 0.])), ('RPE5W23', ': ', array([39, 0, 0, 7]), ' ', array([ 0.84782609, 0. , 0. , 0.15217391]), ' ', array([ 1., 0., 0., 0.])), ('RPE5W24', ': ', array([39, 0, 0, 0]), ' ', array([ 1., 0., 0., 0.]), ' ', array([ 1., 0., 0., 0.])), ('RPE5W27', ': ', array([32, 0, 0, 0]), ' ', a…	100000000000	0.993928		0.994064	0
768	7	90271101	TTTxACA	C	A	[('RPE5W22', ': ', array([ 0, 0, 92, 0]), ' ', array([ 0., 0., 1., 0.]), ' ', array([ 0., 0., 1., 0.])), ('RPE5W23', ': ', array([ 8, 0, 36, 0]), ' ', array([ 0.18181818, 0. , 0.81818182, 0. ]), ' ', array([ 0., 0., 1., 0.])), ('RPE5W24', ': ', array([ 0, 0, 48, 0]), ' ', array([ 0., 0., 1., 0.]), ' ', array([ 0., 0., 1., 0.])), ('RPE5W27', ': ', array([ 0, 0, 53, 0]), ' ', array([ 0., 0., 1., 0.…	100000000000	0.996904		0.997793	0
769	7	97303573	TATxTAT	C	T	[('RPE5W22', ': ', array([ 0, 2, 62, 0]), ' ', array([ 0. , 0.03125, 0.96875, 0. ]), ' ', array([ 0., 0., 1., 0.])), ('RPE5W23', ': ', array([ 1, 10, 43, 0]), ' ', array([ 0.01851852, 0.18518519, 0.7962963 , 0. ]), ' ', array([ 0., 0., 1., 0.])), ('RPE5W24', ': ', array([ 0, 1, 50, 0]), ' ', array([ 0. , 0.01960784, 0.98039216, 0. ]), ' ', array([ 0., 0., 1., 0.])), ('RPE5W27', ': ', array([ 0, 0…	100000000000	0.97897		0.998756	0
770	8	33999851	TTTxTGA	T	A	[('RPE5W22', ': ', array([ 0, 55, 0, 0]), ' ', array([ 0., 1., 0., 0.]), ' ', array([ 0., 1., 0., 0.])), ('RPE5W23', ': ', array([ 4, 16, 0, 0]), ' ', array([ 0.2, 0.8, 0. , 0. ]), ' ', array([ 0., 1., 0., 0.])), ('RPE5W24', ': ', array([ 0, 28, 0, 0]), ' ', array([ 0., 1., 0., 0.]), ' ', array([ 0., 1., 0., 0.])), ('RPE5W27', ': ', array([ 0, 37, 1, 0]), ' ', array([ 0. , 0.97368421, 0.02631579,…	100000000000	0.991644		0.996822	0
771	8	47515684	TCAxCCA	A	G	[('RPE5W22', ': ', array([44, 0, 0, 1]), ' ', array([ 0.97777778, 0. , 0. , 0.02222222]), ' ', array([ 1., 0., 0., 0.])), ('RPE5W23', ': ', array([35, 0, 0, 13]), ' ', array([ 0.72916667, 0. , 0. , 0.27083333]), ' ', array([ 1., 0., 0., 1.])), ('RPE5W24', ': ', array([48, 0, 0, 1]), ' ', array([ 0.97959184, 0. , 0. , 0.02040816]), ' ', array([ 1., 0., 0., 0.])), ('RPE5W27', ': ', array([43, 0, 0,…	100000000000	0.988871		0.999356	0
772	8	100849137	GAAxTAC	G	A	[('RPE5W22', ': ', array([ 0, 0, 0, 54]), ' ', array([ 0., 0., 0., 1.]), ' ', array([ 0., 0., 0., 1.])), ('RPE5W23', ': ', array([ 7, 0, 0, 30]), ' ', array([ 0.18918919, 0. , 0. , 0.81081081]), ' ', array([ 0., 0., 0., 1.])), ('RPE5W24', ': ', array([ 0, 0, 0, 42]), ' ', array([ 0., 0., 0., 1.]), ' ', array([ 0., 0., 0., 1.])), ('RPE5W27', ': ', array([ 0, 1, 0, 40]), ' ', array([ 0. , 0.0243902…	100000000000	0.997967		0.999058	0
773	9	9071378	TTAxCCT	T	A	[('RPE5W22', ': ', array([ 0, 49, 0, 0]), ' ', array([ 0., 1., 0., 0.]), ' ', array([ 0., 1., 0., 0.])), ('RPE5W23', ': ', array([ 8, 23, 2, 1]), ' ', array([ 0.23529412, 0.67647059, 0.05882353, 0.02941176]), ' ', array([ 1., 1., 0., 0.])), ('RPE5W24', ': ', array([ 0, 34, 1, 0]), ' ', array([ 0. , 0.97142857, 0.02857143, 0. ]), ' ', array([ 0., 1., 0., 0.])), ('RPE5W27', ': ', array([ 0, 38, 0, …	100000000000	0.991712		0.999971	0
774	9	12566229	GTAxAAT	G	T	[('RPE5W22', ': ', array([ 1, 0, 1, 54]), ' ', array([ 0.01785714, 0. , 0.01785714, 0.96428571]), ' ', array([ 0., 0., 0., 1.])), ('RPE5W23', ': ', array([ 1, 9, 0, 32]), ' ', array([ 0.02380952, 0.21428571, 0. , 0.76190476]), ' ', array([ 0., 1., 0., 1.])), ('RPE5W24', ': ', array([ 0, 0, 0, 49]), ' ', array([ 0., 0., 0., 1.]), ' ', array([ 0., 0., 0., 1.])), ('RPE5W27', ': ', array([ 0, 0, 0, 3…	100000000000	0.981506		0.998697	0
775	9	22887923	AAAxAAT	G	A	[('RPE5W22', ': ', array([ 0, 0, 0, 43]), ' ', array([ 0., 0., 0., 1.]), ' ', array([ 0., 0., 0., 1.])), ('RPE5W23', ': ', array([ 9, 0, 0, 16]), ' ', array([ 0.36, 0. , 0. , 0.64]), ' ', array([ 1., 0., 0., 1.])), ('RPE5W24', ': ', array([ 3, 0, 0, 30]), ' ', array([ 0.09090909, 0. , 0. , 0.90909091]), ' ', array([ 0., 0., 0., 1.])), ('RPE5W27', ': ', array([ 2, 0, 1, 25]), ' ', array([ 0.071428…	100000000000	0.933561		0.994721	0
776	9	75506338	TAAxTCC	G	T	[('RPE5W22', ': ', array([ 0, 0, 0, 55]), ' ', array([ 0., 0., 0., 1.]), ' ', array([ 0., 0., 0., 1.])), ('RPE5W23', ': ', array([ 0, 11, 0, 27]), ' ', array([ 0. , 0.28947368, 0. , 0.71052632]), ' ', array([ 0., 1., 0., 1.])), ('RPE5W24', ': ', array([ 0, 0, 0, 40]), ' ', array([ 0., 0., 0., 1.]), ' ', array([ 0., 0., 0., 1.])), ('RPE5W27', ': ', array([ 0, 1, 0, 41]), ' ', array([ 0. , 0.023809…	100000000000	0.995879		0.999969	0
777	9	92905064	GCCxTAG	C	G	[('RPE5W22', ': ', array([ 0, 0, 58, 0]), ' ', array([ 0., 0., 1., 0.]), ' ', array([ 0., 0., 1., 0.])), ('RPE5W23', ': ', array([ 0, 0, 18, 9]), ' ', array([ 0. , 0. , 0.66666667, 0.33333333]), ' ', array([ 0., 0., 1., 1.])), ('RPE5W24', ': ', array([ 0, 0, 43, 0]), ' ', array([ 0., 0., 1., 0.]), ' ', array([ 0., 0., 1., 0.])), ('RPE5W27', ': ', array([ 0, 0, 34, 0]), ' ', array([ 0., 0., 1., 0.…	100000000000	0.992251		0.999997	0
778	9	103719451	ATCxCAA	C	T	[('RPE5W22', ': ', array([ 0, 0, 48, 0]), ' ', array([ 0., 0., 1., 0.]), ' ', array([ 0., 0., 1., 0.])), ('RPE5W23', ': ', array([ 1, 10, 22, 1]), ' ', array([ 0.02941176, 0.29411765, 0.64705882, 0.02941176]), ' ', array([ 0., 1., 1., 0.])), ('RPE5W24', ': ', array([ 1, 0, 47, 1]), ' ', array([ 0.02040816, 0. , 0.95918367, 0.02040816]), ' ', array([ 0., 0., 1., 0.])), ('RPE5W27', ': ', array([ 0,…	100000000000	0.989674		0.999995	0
779	10	108129753	TGCxAAA	C	T	[('RPE5W22', ': ', array([ 0, 0, 73, 0]), ' ', array([ 0., 0., 1., 0.]), ' ', array([ 0., 0., 1., 0.])), ('RPE5W23', ': ', array([ 0, 7, 34, 3]), ' ', array([ 0. , 0.15909091, 0.77272727, 0.06818182]), ' ', array([ 0., 0., 1., 0.])), ('RPE5W24', ': ', array([ 0, 0, 42, 0]), ' ', array([ 0., 0., 1., 0.]), ' ', array([ 0., 0., 1., 0.])), ('RPE5W27', ': ', array([ 0, 0, 55, 1]), ' ', array([ 0. , 0.…	100000000000	0.985367		0.99993	0
780	11	48258875	CAGxTCT	T	G	[('RPE5W22', ': ', array([ 0, 75, 0, 1]), ' ', array([ 0. , 0.98684211, 0. , 0.01315789]), ' ', array([ 0., 1., 0., 0.])), ('RPE5W23', ': ', array([ 0, 54, 0, 11]), ' ', array([ 0. , 0.83076923, 0. , 0.16923077]), ' ', array([ 0., 1., 0., 0.])), ('RPE5W24', ': ', array([ 0, 56, 0, 0]), ' ', array([ 0., 1., 0., 0.]), ' ', array([ 0., 1., 0., 0.])), ('RPE5W27', ': ', array([ 0, 51, 0, 1]), ' ', arr…	100000000000	0.993002		0.998587	0
781	11	57363404	CGTxGTT	T	C	[('RPE5W22', ': ', array([ 1, 69, 1, 0]), ' ', array([ 0.01408451, 0.97183099, 0.01408451, 0. ]), ' ', array([ 0., 1., 0., 0.])), ('RPE5W23', ': ', array([ 0, 30, 10, 1]), ' ', array([ 0. , 0.73170732, 0.24390244, 0.02439024]), ' ', array([ 0., 1., 1., 0.])), ('RPE5W24', ': ', array([ 0, 46, 0, 0]), ' ', array([ 0., 1., 0., 0.]), ' ', array([ 0., 1., 0., 0.])), ('RPE5W27', ': ', array([ 0, 53, 0,…	100000000000	0.992026		0.999994	0
782	11	98070902	GCAxTAA	G	T	[('RPE5W22', ': ', array([ 0, 0, 1, 75]), ' ', array([ 0. , 0. , 0.01315789, 0.98684211]), ' ', array([ 0., 0., 0., 1.])), ('RPE5W23', ': ', array([ 0, 8, 0, 41]), ' ', array([ 0. , 0.16326531, 0. , 0.83673469]), ' ', array([ 0., 0., 0., 1.])), ('RPE5W24', ': ', array([ 0, 0, 0, 55]), ' ', array([ 0., 0., 0., 1.]), ' ', array([ 0., 0., 0., 1.])), ('RPE5W27', ': ', array([ 1, 0, 0, 43]), ' ', arra…	100000000000	0.991559		0.998914	0
783	11	133159003	ATTxGAT	A	G	[('RPE5W22', ': ', array([51, 0, 1, 0]), ' ', array([ 0.98076923, 0. , 0.01923077, 0. ]), ' ', array([ 1., 0., 0., 0.])), ('RPE5W23', ': ', array([30, 0, 0, 6]), ' ', array([ 0.83333333, 0. , 0. , 0.16666667]), ' ', array([ 1., 0., 0., 0.])), ('RPE5W24', ': ', array([55, 0, 0, 0]), ' ', array([ 1., 0., 0., 0.]), ' ', array([ 1., 0., 0., 0.])), ('RPE5W27', ': ', array([47, 0, 1, 0]), ' ', array([ …	100000000000	0.990951		0.997999	0
784	12	8164150	GAAxGAG	T	G	[('RPE5W22', ': ', array([ 0, 64, 0, 0]), ' ', array([ 0., 1., 0., 0.]), ' ', array([ 0., 1., 0., 0.])), ('RPE5W23', ': ', array([ 0, 35, 0, 13]), ' ', array([ 0. , 0.72916667, 0. , 0.27083333]), ' ', array([ 0., 1., 0., 1.])), ('RPE5W24', ': ', array([ 0, 52, 0, 0]), ' ', array([ 0., 1., 0., 0.]), ' ', array([ 0., 1., 0., 0.])), ('RPE5W27', ': ', array([ 0, 48, 0, 0]), ' ', array([ 0., 1., 0., 0…	100000000000	0.994127		0.999998	0
785	12	29191595	AACxAGC	A	G	[('RPE5W22', ': ', array([78, 1, 1, 0]), ' ', array([ 0.975 , 0.0125, 0.0125, 0. ]), ' ', array([ 1., 0., 0., 0.])), ('RPE5W23', ': ', array([48, 1, 0, 11]), ' ', array([ 0.8 , 0.01666667, 0. , 0.18333333]), ' ', array([ 1., 0., 0., 0.])), ('RPE5W24', ': ', array([62, 1, 0, 1]), ' ', array([ 0.96875 , 0.015625, 0. , 0.015625]), ' ', array([ 1., 0., 0., 0.])), ('RPE5W27', ': ', array([43, 0, 0, 0]…	100000000000	0.993679		0.999737	0
786	12	34556919	GGGxCAG	C	T	[('RPE5W22', ': ', array([ 0, 0, 80, 0]), ' ', array([ 0., 0., 1., 0.]), ' ', array([ 0., 0., 1., 0.])), ('RPE5W23', ': ', array([ 1, 7, 53, 0]), ' ', array([ 0.01639344, 0.1147541 , 0.86885246, 0. ]), ' ', array([ 0., 0., 1., 0.])), ('RPE5W24', ': ', array([ 0, 0, 61, 0]), ' ', array([ 0., 0., 1., 0.]), ' ', array([ 0., 0., 1., 0.])), ('RPE5W27', ': ', array([ 0, 0, 61, 2]), ' ', array([ 0. , 0.…	100000000000	0.992974		0.998169	0
787	12	60760696	AATxAAT	T	C	[('RPE5W22', ': ', array([ 1, 77, 0, 2]), ' ', array([ 0.0125, 0.9625, 0. , 0.025 ]), ' ', array([ 0., 1., 0., 0.])), ('RPE5W23', ': ', array([ 0, 34, 12, 1]), ' ', array([ 0. , 0.72340426, 0.25531915, 0.0212766 ]), ' ', array([ 0., 1., 1., 0.])), ('RPE5W24', ': ', array([ 0, 52, 0, 0]), ' ', array([ 0., 1., 0., 0.]), ' ', array([ 0., 1., 0., 0.])), ('RPE5W27', ': ', array([ 0, 56, 0, 0]), ' ', a…	100000000000	0.990502		0.994679	0
788	12	63238209	AAAxCAG	G	T	[('RPE5W22', ': ', array([ 0, 0, 0, 75]), ' ', array([ 0., 0., 0., 1.]), ' ', array([ 0., 0., 0., 1.])), ('RPE5W23', ': ', array([ 0, 12, 1, 39]), ' ', array([ 0. , 0.23076923, 0.01923077, 0.75 ]), ' ', array([ 0., 1., 0., 1.])), ('RPE5W24', ': ', array([ 0, 0, 0, 46]), ' ', array([ 0., 0., 0., 1.]), ' ', array([ 0., 0., 0., 1.])), ('RPE5W27', ': ', array([ 0, 0, 0, 46]), ' ', array([ 0., 0., 0.,…	100000000000	0.99499		0.999299	0
789	12	82288781	CAGxGGT	A	T	[('RPE5W22', ': ', array([75, 0, 0, 0]), ' ', array([ 1., 0., 0., 0.]), ' ', array([ 1., 0., 0., 0.])), ('RPE5W23', ': ', array([38, 10, 0, 0]), ' ', array([ 0.79166667, 0.20833333, 0. , 0. ]), ' ', array([ 1., 1., 0., 0.])), ('RPE5W24', ': ', array([52, 1, 0, 0]), ' ', array([ 0.98113208, 0.01886792, 0. , 0. ]), ' ', array([ 1., 0., 0., 0.])), ('RPE5W27', ': ', array([54, 0, 1, 0]), ' ', array([…	100000000000	0.980785		0.993154	0
790	13	102744651	AGTxTTA	C	A	[('RPE5W22', ': ', array([ 0, 0, 53, 0]), ' ', array([ 0., 0., 1., 0.]), ' ', array([ 0., 0., 1., 0.])), ('RPE5W23', ': ', array([11, 0, 27, 1]), ' ', array([ 0.28205128, 0. , 0.69230769, 0.02564103]), ' ', array([ 1., 0., 1., 0.])), ('RPE5W24', ': ', array([ 1, 0, 43, 0]), ' ', array([ 0.02272727, 0. , 0.97727273, 0. ]), ' ', array([ 0., 0., 1., 0.])), ('RPE5W27', ': ', array([ 0, 0, 37, 0]), ' …	100000000000	0.992181		0.999701	0
791	14	41278434	AGGxTTT	T	G	[('RPE5W22', ': ', array([ 0, 48, 0, 0]), ' ', array([ 0., 1., 0., 0.]), ' ', array([ 0., 1., 0., 0.])), ('RPE5W23', ': ', array([ 0, 23, 0, 7]), ' ', array([ 0. , 0.76666667, 0. , 0.23333333]), ' ', array([ 0., 1., 0., 1.])), ('RPE5W24', ': ', array([ 1, 43, 0, 1]), ' ', array([ 0.02222222, 0.95555556, 0. , 0.02222222]), ' ', array([ 0., 1., 0., 0.])), ('RPE5W27', ': ', array([ 0, 35, 0, 0]), ' …	100000000000	0.983503		0.998699	0
792	14	77679618	TTAxAAG	A	G	[('RPE5W22', ': ', array([44, 0, 2, 0]), ' ', array([ 0.95652174, 0. , 0.04347826, 0. ]), ' ', array([ 1., 0., 0., 0.])), ('RPE5W23', ': ', array([21, 0, 0, 8]), ' ', array([ 0.72413793, 0. , 0. , 0.27586207]), ' ', array([ 1., 0., 0., 1.])), ('RPE5W24', ': ', array([33, 0, 0, 0]), ' ', array([ 1., 0., 0., 0.]), ' ', array([ 1., 0., 0., 0.])), ('RPE5W27', ': ', array([39, 0, 0, 0]), ' ', array([ …	100000000000	0.98756		0.999985	0
793	14	88681336	AGTxTGG	T	G	[('RPE5W22', ': ', array([ 0, 54, 0, 0]), ' ', array([ 0., 1., 0., 0.]), ' ', array([ 0., 1., 0., 0.])), ('RPE5W23', ': ', array([ 1, 30, 0, 10]), ' ', array([ 0.02439024, 0.73170732, 0. , 0.24390244]), ' ', array([ 0., 1., 0., 1.])), ('RPE5W24', ': ', array([ 0, 35, 0, 0]), ' ', array([ 0., 1., 0., 0.]), ' ', array([ 0., 1., 0., 0.])), ('RPE5W27', ': ', array([ 0, 37, 0, 1]), ' ', array([ 0. , 0…	100000000000	0.989068		0.999366	0
794	15	24229097	TTTxAAT	C	A	[('RPE5W22', ': ', array([ 0, 0, 62, 0]), ' ', array([ 0., 0., 1., 0.]), ' ', array([ 0., 0., 1., 0.])), ('RPE5W23', ': ', array([12, 0, 30, 0]), ' ', array([ 0.28571429, 0. , 0.71428571, 0. ]), ' ', array([ 1., 0., 1., 0.])), ('RPE5W24', ': ', array([ 0, 0, 41, 0]), ' ', array([ 0., 0., 1., 0.]), ' ', array([ 0., 0., 1., 0.])), ('RPE5W27', ': ', array([ 0, 0, 31, 0]), ' ', array([ 0., 0., 1., 0.…	100000000000	0.99578		0.999999	0
795	15	45339461	ACAxTAT	C	T	[('RPE5W22', ': ', array([ 0, 0, 46, 0]), ' ', array([ 0., 0., 1., 0.]), ' ', array([ 0., 0., 1., 0.])), ('RPE5W23', ': ', array([ 0, 9, 30, 0]), ' ', array([ 0. , 0.23076923, 0.76923077, 0. ]), ' ', array([ 0., 1., 1., 0.])), ('RPE5W24', ': ', array([ 0, 0, 40, 0]), ' ', array([ 0., 0., 1., 0.]), ' ', array([ 0., 0., 1., 0.])), ('RPE5W27', ': ', array([ 0, 0, 34, 0]), ' ', array([ 0., 0., 1., 0.…	100000000000	0.997396		0.999656	0
796	17	3012832	TCTxGGA	G	T	[('RPE5W22', ': ', array([ 0, 0, 0, 48]), ' ', array([ 0., 0., 0., 1.]), ' ', array([ 0., 0., 0., 1.])), ('RPE5W23', ': ', array([ 0, 9, 0, 24]), ' ', array([ 0. , 0.27272727, 0. , 0.72727273]), ' ', array([ 0., 1., 0., 1.])), ('RPE5W24', ': ', array([ 0, 0, 0, 45]), ' ', array([ 0., 0., 0., 1.]), ' ', array([ 0., 0., 0., 1.])), ('RPE5W27', ': ', array([ 0, 0, 0, 42]), ' ', array([ 0., 0., 0., 1.…	100000000000	0.99234		0.998459	0
797	18	7431643	ATTxAAA	G	T	[('RPE5W22', ': ', array([ 0, 0, 0, 27]), ' ', array([ 0., 0., 0., 1.]), ' ', array([ 0., 0., 0., 1.])), ('RPE5W23', ': ', array([ 0, 7, 0, 14]), ' ', array([ 0. , 0.33333333, 0. , 0.66666667]), ' ', array([ 0., 1., 0., 1.])), ('RPE5W24', ': ', array([ 0, 0, 1, 24]), ' ', array([ 0. , 0. , 0.04, 0.96]), ' ', array([ 0., 0., 0., 1.])), ('RPE5W27', ': ', array([ 0, 0, 0, 17]), ' ', array([ 0., 0., …	100000000000	0.984791		0.994273	0
798	18	51152316	TCTxTGC	C	A	[('RPE5W22', ': ', array([ 0, 1, 38, 0]), ' ', array([ 0. , 0.02564103, 0.97435897, 0. ]), ' ', array([ 0., 0., 1., 0.])), ('RPE5W23', ': ', array([10, 0, 15, 0]), ' ', array([ 0.4, 0. , 0.6, 0. ]), ' ', array([ 1., 0., 1., 0.])), ('RPE5W24', ': ', array([ 0, 0, 34, 0]), ' ', array([ 0., 0., 1., 0.]), ' ', array([ 0., 0., 1., 0.])), ('RPE5W27', ': ', array([ 0, 0, 29, 0]), ' ', array([ 0., 0., 1.…	100000000000	0.987714		0.999997	0
799	20	7102709	CTGxGCC	C	T	[('RPE5W22', ': ', array([ 0, 0, 68, 0]), ' ', array([ 0., 0., 1., 0.]), ' ', array([ 0., 0., 1., 0.])), ('RPE5W23', ': ', array([ 0, 8, 50, 0]), ' ', array([ 0. , 0.13793103, 0.86206897, 0. ]), ' ', array([ 0., 0., 1., 0.])), ('RPE5W24', ': ', array([ 0, 0, 52, 1]), ' ', array([ 0. , 0. , 0.98113208, 0.01886792]), ' ', array([ 0., 0., 1., 0.])), ('RPE5W27', ': ', array([ 1, 0, 51, 0]), ' ', arra…	100000000000	0.993279		0.996262	0
800	20	15917954	AAAxAGA	G	T	[('RPE5W22', ': ', array([ 0, 0, 0, 72]), ' ', array([ 0., 0., 0., 1.]), ' ', array([ 0., 0., 0., 1.])), ('RPE5W23', ': ', array([ 0, 8, 0, 39]), ' ', array([ 0. , 0.17021277, 0. , 0.82978723]), ' ', array([ 0., 0., 0., 1.])), ('RPE5W24', ': ', array([ 0, 0, 0, 54]), ' ', array([ 0., 0., 0., 1.]), ' ', array([ 0., 0., 0., 1.])), ('RPE5W27', ': ', array([ 0, 0, 0, 48]), ' ', array([ 0., 0., 0., 1.…	100000000000	0.996029		0.996279	0
801	20	20878683	CCTxCCT	G	A	[('RPE5W22', ': ', array([ 0, 1, 0, 73]), ' ', array([ 0. , 0.01351351, 0. , 0.98648649]), ' ', array([ 0., 0., 0., 1.])), ('RPE5W23', ': ', array([ 7, 0, 0, 41]), ' ', array([ 0.14583333, 0. , 0. , 0.85416667]), ' ', array([ 0., 0., 0., 1.])), ('RPE5W24', ': ', array([ 0, 0, 0, 43]), ' ', array([ 0., 0., 0., 1.]), ' ', array([ 0., 0., 0., 1.])), ('RPE5W27', ': ', array([ 0, 0, 0, 47]), ' ', arra…	100000000000	0.99698		0.997145	0
802	20	39390354	TTGxGAA	G	A	[('RPE5W22', ': ', array([ 0, 0, 0, 71]), ' ', array([ 0., 0., 0., 1.]), ' ', array([ 0., 0., 0., 1.])), ('RPE5W23', ': ', array([ 7, 0, 0, 56]), ' ', array([ 0.11111111, 0. , 0. , 0.88888889]), ' ', array([ 0., 0., 0., 1.])), ('RPE5W24', ': ', array([ 0, 0, 0, 58]), ' ', array([ 0., 0., 0., 1.]), ' ', array([ 0., 0., 0., 1.])), ('RPE5W27', ': ', array([ 0, 0, 0, 56]), ' ', array([ 0., 0., 0., 1.…	100000000000	0.998457		0.992904	0
803	20	49240393	TTTxAGA	G	T	[('RPE5W22', ': ', array([ 0, 0, 0, 94]), ' ', array([ 0., 0., 0., 1.]), ' ', array([ 0., 0., 0., 1.])), ('RPE5W23', ': ', array([ 0, 11, 0, 42]), ' ', array([ 0. , 0.20754717, 0. , 0.79245283]), ' ', array([ 0., 1., 0., 1.])), ('RPE5W24', ': ', array([ 0, 0, 0, 42]), ' ', array([ 0., 0., 0., 1.]), ' ', array([ 0., 0., 0., 1.])), ('RPE5W27', ': ', array([ 0, 0, 0, 44]), ' ', array([ 0., 0., 0., 1…	100000000000	0.993303		0.999757	0
804	21	26435766	TCTxAAC	C	A	[('RPE5W22', ': ', array([ 0, 0, 70, 0]), ' ', array([ 0., 0., 1., 0.]), ' ', array([ 0., 0., 1., 0.])), ('RPE5W23', ': ', array([ 8, 0, 19, 0]), ' ', array([ 0.2962963, 0. , 0.7037037, 0. ]), ' ', array([ 1., 0., 1., 0.])), ('RPE5W24', ': ', array([ 0, 0, 40, 0]), ' ', array([ 0., 0., 1., 0.]), ' ', array([ 0., 0., 1., 0.])), ('RPE5W27', ': ', array([ 0, 0, 48, 0]), ' ', array([ 0., 0., 1., 0.])…	100000000000	0.996032		0.999986	0
805	X	16756668	TGCxCCT	G	A	[('RPE5W22', ': ', array([ 0, 0, 1, 53]), ' ', array([ 0. , 0. , 0.01851852, 0.98148148]), ' ', array([ 0., 0., 0., 1.])), ('RPE5W23', ': ', array([13, 0, 0, 32]), ' ', array([ 0.28888889, 0. , 0. , 0.71111111]), ' ', array([ 1., 0., 0., 1.])), ('RPE5W24', ': ', array([ 0, 0, 0, 44]), ' ', array([ 0., 0., 0., 1.]), ' ', array([ 0., 0., 0., 1.])), ('RPE5W27', ': ', array([ 0, 0, 0, 38]), ' ', arra…	100000000000	0.985676		0.998409	0
806	X	83846835	TGTxGCA	G	T	[('RPE5W22', ': ', array([ 0, 0, 0, 52]), ' ', array([ 0., 0., 0., 1.]), ' ', array([ 0., 0., 0., 1.])), ('RPE5W23', ': ', array([ 0, 13, 0, 30]), ' ', array([ 0. , 0.30232558, 0. , 0.69767442]), ' ', array([ 0., 1., 0., 1.])), ('RPE5W24', ': ', array([ 0, 0, 0, 43]), ' ', array([ 0., 0., 0., 1.]), ' ', array([ 0., 0., 0., 1.])), ('RPE5W27', ': ', array([ 0, 0, 0, 44]), ' ', array([ 0., 0., 0., 1…	100000000000	0.992952		0.999144	0
807	X	89481254	TATxTAT	A	G	[('RPE5W22', ': ', array([72, 0, 0, 0]), ' ', array([ 1., 0., 0., 0.]), ' ', array([ 1., 0., 0., 0.])), ('RPE5W23', ': ', array([26, 0, 0, 10]), ' ', array([ 0.72222222, 0. , 0. , 0.27777778]), ' ', array([ 1., 0., 0., 1.])), ('RPE5W24', ': ', array([51, 0, 0, 0]), ' ', array([ 1., 0., 0., 0.]), ' ', array([ 1., 0., 0., 0.])), ('RPE5W27', ': ', array([41, 0, 0, 0]), ' ', array([ 1., 0., 0., 0.]),…	100000000000	0.995611		0.999875	0
808	X	123940761	GAGxCTA	G	T	[('RPE5W22', ': ', array([ 0, 0, 0, 50]), ' ', array([ 0., 0., 0., 1.]), ' ', array([ 0., 0., 0., 1.])), ('RPE5W23', ': ', array([ 1, 7, 1, 20]), ' ', array([ 0.03448276, 0.24137931, 0.03448276, 0.68965517]), ' ', array([ 0., 1., 0., 1.])), ('RPE5W24', ': ', array([ 0, 0, 0, 42]), ' ', array([ 0., 0., 0., 1.]), ' ', array([ 0., 0., 0., 1.])), ('RPE5W27', ': ', array([ 0, 1, 0, 35]), ' ', array([ …	100000000000	0.997685		0.999992	0
809	4	122326868	ATTxTAT	A	T	[('RPE5W22', ': ', array([34, 8, 1, 1]), ' ', array([ 0.77272727, 0.18181818, 0.02272727, 0.02272727]), ' ', array([ 1., 0., 0., 0.])), ('RPE5W23', ': ', array([11, 11, 1, 0]), ' ', array([ 0.47826087, 0.47826087, 0.04347826, 0. ]), ' ', array([ 1., 1., 0., 0.])), ('RPE5W24', ': ', array([25, 0, 0, 0]), ' ', array([ 1., 0., 0., 0.]), ' ', array([ 1., 0., 0., 0.])), ('RPE5W27', ': ', array([21, 3,…	100000000000	0.894161		0.99832	0
810	9	46368546	AGCxGTC	T	A	[('RPE5W22', ': ', array([ 2, 54, 0, 0]), ' ', array([ 0.03571429, 0.96428571, 0. , 0. ]), ' ', array([ 0., 1., 0., 0.])), ('RPE5W23', ': ', array([11, 28, 0, 0]), ' ', array([ 0.28205128, 0.71794872, 0. , 0. ]), ' ', array([ 1., 1., 0., 0.])), ('RPE5W24', ': ', array([ 2, 35, 0, 0]), ' ', array([ 0.05405405, 0.94594595, 0. , 0. ]), ' ', array([ 0., 1., 0., 0.])), ('RPE5W27', ': ', array([ 0, 37,…	100000000000	0.96474		0.999912	0
811	9	46368609	ACCxCTC	T	A	[('RPE5W22', ': ', array([ 4, 54, 1, 0]), ' ', array([ 0.06779661, 0.91525424, 0.01694915, 0. ]), ' ', array([ 0., 1., 0., 0.])), ('RPE5W23', ': ', array([16, 33, 1, 0]), ' ', array([ 0.32, 0.66, 0.02, 0. ]), ' ', array([ 1., 1., 0., 0.])), ('RPE5W24', ': ', array([ 2, 35, 0, 0]), ' ', array([ 0.05405405, 0.94594595, 0. , 0. ]), ' ', array([ 0., 1., 0., 0.])), ('RPE5W27', ': ', array([ 0, 37, 0, …	100000000000	0.952247		0.999929	0
812	9	46368633	TTTxCAT	G	A	[('RPE5W22', ': ', array([ 3, 1, 0, 53]), ' ', array([ 0.05263158, 0.01754386, 0. , 0.92982456]), ' ', array([ 0., 0., 0., 1.])), ('RPE5W23', ': ', array([15, 0, 1, 35]), ' ', array([ 0.29411765, 0. , 0.01960784, 0.68627451]), ' ', array([ 1., 0., 0., 1.])), ('RPE5W24', ': ', array([ 2, 0, 0, 32]), ' ', array([ 0.05882353, 0. , 0. , 0.94117647]), ' ', array([ 0., 0., 0., 1.])), ('RPE5W27', ': ', …	100000000000	0.959751		0.999773	0
813	8	144390135	GAGxAGA	A	G	[('RPE5W22', ': ', array([21, 0, 0, 5]), ' ', array([ 0.80769231, 0. , 0. , 0.19230769]), ' ', array([ 1., 0., 0., 0.])), ('RPE5W23', ': ', array([12, 0, 0, 6]), ' ', array([ 0.66666667, 0. , 0. , 0.33333333]), ' ', array([ 1., 0., 0., 1.])), ('RPE5W24', ': ', array([17, 0, 0, 2]), ' ', array([ 0.89473684, 0. , 0. , 0.10526316]), ' ', array([ 1., 0., 0., 0.])), ('RPE5W27', ': ', array([7, 0, 0, 2…	100000000	0.825389	0.818182	0.999965	0
814	8	70872346	AAAxAAA	T	A	[('RPE5W22', ': ', array([ 5, 50, 0, 0]), ' ', array([ 0.09090909, 0.90909091, 0. , 0. ]), ' ', array([ 0., 1., 0., 0.])), ('RPE5W23', ': ', array([ 7, 17, 0, 0]), ' ', array([ 0.29166667, 0.70833333, 0. , 0. ]), ' ', array([ 1., 1., 0., 0.])), ('RPE5W24', ': ', array([ 3, 41, 0, 0]), ' ', array([ 0.06818182, 0.93181818, 0. , 0. ]), ' ', array([ 0., 1., 0., 0.])), ('RPE5W27', ': ', array([ 2, 27,…	100000000000	0.925114		0.996381	0
815	5	38990750	TCAxATA	G	T	[('RPE5W22', ': ', array([ 0, 3, 0, 68]), ' ', array([ 0. , 0.04225352, 0. , 0.95774648]), ' ', array([ 0., 0., 0., 1.])), ('RPE5W23', ': ', array([ 0, 18, 1, 25]), ' ', array([ 0. , 0.40909091, 0.02272727, 0.56818182]), ' ', array([ 0., 1., 0., 1.])), ('RPE5W24', ': ', array([ 2, 7, 1, 56]), ' ', array([ 0.03030303, 0.10606061, 0.01515152, 0.84848485]), ' ', array([ 0., 0., 0., 1.])), ('RPE5W27'…	100000000000	0.908508		0.999995	0
816	9	41991	GTCxCTG	C	T	[('RPE5W22', ': ', array([ 0, 13, 56, 0]), ' ', array([ 0. , 0.1884058, 0.8115942, 0. ]), ' ', array([ 0., 0., 1., 0.])), ('RPE5W23', ': ', array([ 0, 10, 58, 1]), ' ', array([ 0. , 0.14492754, 0.84057971, 0.01449275]), ' ', array([ 0., 0., 1., 0.])), ('RPE5W24', ': ', array([ 0, 5, 30, 0]), ' ', array([ 0. , 0.14285714, 0.85714286, 0. ]), ' ', array([ 0., 0., 1., 0.])), ('RPE5W27', ': ', array([…	10	0.849248	0.4	0.998512	0
817	1	5593936	TTTxTTT	C	G	[('RPE5W22', ': ', array([ 0, 0, 63, 0]), ' ', array([ 0., 0., 1., 0.]), ' ', array([ 0., 0., 1., 0.])), ('RPE5W23', ': ', array([ 0, 0, 37, 0]), ' ', array([ 0., 0., 1., 0.]), ' ', array([ 0., 0., 1., 0.])), ('RPE5W24', ': ', array([ 0, 0, 23, 8]), ' ', array([ 0. , 0. , 0.74193548, 0.25806452]), ' ', array([ 0., 0., 1., 1.])), ('RPE5W27', ': ', array([ 0, 0, 23, 0]), ' ', array([ 0., 0., 1., 0.…	10000000000	1	0.258065	0.999496	0
818	1	15066257	AAGxGGA	T	C	[('RPE5W22', ': ', array([ 0, 39, 0, 1]), ' ', array([ 0. , 0.975, 0. , 0.025]), ' ', array([ 0., 1., 0., 0.])), ('RPE5W23', ': ', array([ 0, 35, 0, 0]), ' ', array([ 0., 1., 0., 0.]), ' ', array([ 0., 1., 0., 0.])), ('RPE5W24', ': ', array([ 0, 28, 16, 0]), ' ', array([ 0. , 0.63636364, 0.36363636, 0. ]), ' ', array([ 0., 1., 1., 0.])), ('RPE5W27', ': ', array([ 1, 38, 0, 2]), ' ', array([ 0.024…	10000000000	0.98249	0.363636	0.999999	0
819	1	16529435	CATxATC	G	T	[('RPE5W22', ': ', array([ 0, 1, 0, 50]), ' ', array([ 0. , 0.01960784, 0. , 0.98039216]), ' ', array([ 0., 0., 0., 1.])), ('RPE5W23', ': ', array([ 0, 0, 0, 24]), ' ', array([ 0., 0., 0., 1.]), ' ', array([ 0., 0., 0., 1.])), ('RPE5W24', ': ', array([ 0, 17, 0, 20]), ' ', array([ 0. , 0.45945946, 0. , 0.54054054]), ' ', array([ 0., 1., 0., 1.])), ('RPE5W27', ': ', array([ 0, 0, 0, 33]), ' ', arr…	10000000000	0.992352	0.459459	1	0
820	1	39342090	GCAxGTG	G	T	[('RPE5W22', ': ', array([ 0, 1, 1, 48]), ' ', array([ 0. , 0.01960784, 0.01960784, 0.94117647]), ' ', array([ 0., 0., 0., 1.])), ('RPE5W23', ': ', array([ 0, 0, 0, 24]), ' ', array([ 0., 0., 0., 1.]), ' ', array([ 0., 0., 0., 1.])), ('RPE5W24', ': ', array([ 0, 8, 0, 25]), ' ', array([ 0. , 0.24242424, 0. , 0.75757576]), ' ', array([ 0., 1., 0., 1.])), ('RPE5W27', ': ', array([ 0, 1, 0, 25]), ' …	10000000000	0.984476	0.242424	0.99394	0
821	1	76393637	TAGxTAT	C	A	[('RPE5W22', ': ', array([ 0, 0, 65, 0]), ' ', array([ 0., 0., 1., 0.]), ' ', array([ 0., 0., 1., 0.])), ('RPE5W23', ': ', array([ 0, 0, 45, 0]), ' ', array([ 0., 0., 1., 0.]), ' ', array([ 0., 0., 1., 0.])), ('RPE5W24', ': ', array([12, 2, 27, 0]), ' ', array([ 0.29268293, 0.04878049, 0.65853659, 0. ]), ' ', array([ 1., 0., 1., 0.])), ('RPE5W27', ': ', array([ 0, 0, 50, 0]), ' ', array([ 0., 0.,…	10000000000	0.995508	0.292683	1	0
822	1	81457701	ATAxGAT	G	T	[('RPE5W22', ': ', array([ 2, 1, 0, 45]), ' ', array([ 0.04166667, 0.02083333, 0. , 0.9375 ]), ' ', array([ 0., 0., 0., 1.])), ('RPE5W23', ': ', array([ 0, 1, 0, 30]), ' ', array([ 0. , 0.03225806, 0. , 0.96774194]), ' ', array([ 0., 0., 0., 1.])), ('RPE5W24', ': ', array([ 0, 11, 0, 24]), ' ', array([ 0. , 0.31428571, 0. , 0.68571429]), ' ', array([ 0., 1., 0., 1.])), ('RPE5W27', ': ', array([ 0…	10000000000	0.98206	0.314286	0.999993	0
823	1	105117244	ATTxCCA	G	A	[('RPE5W22', ': ', array([ 0, 0, 0, 42]), ' ', array([ 0., 0., 0., 1.]), ' ', array([ 0., 0., 0., 1.])), ('RPE5W23', ': ', array([ 0, 0, 0, 39]), ' ', array([ 0., 0., 0., 1.]), ' ', array([ 0., 0., 0., 1.])), ('RPE5W24', ': ', array([ 6, 0, 0, 24]), ' ', array([ 0.2, 0. , 0. , 0.8]), ' ', array([ 0., 0., 0., 1.])), ('RPE5W27', ': ', array([ 0, 0, 0, 42]), ' ', array([ 0., 0., 0., 1.]), ' ', array…	10000000000	0.997403	0.2	0.998777	0
824	1	119065074	TGGxAAT	C	A	[('RPE5W22', ': ', array([ 0, 0, 53, 0]), ' ', array([ 0., 0., 1., 0.]), ' ', array([ 0., 0., 1., 0.])), ('RPE5W23', ': ', array([ 0, 0, 28, 0]), ' ', array([ 0., 0., 1., 0.]), ' ', array([ 0., 0., 1., 0.])), ('RPE5W24', ': ', array([18, 0, 22, 0]), ' ', array([ 0.45, 0. , 0.55, 0. ]), ' ', array([ 1., 0., 1., 0.])), ('RPE5W27', ': ', array([ 0, 0, 35, 0]), ' ', array([ 0., 0., 1., 0.]), ' ', arr…	10000000000	0.997727	0.45	1	0
825	1	155471867	TTTxTTT	T	C	[('RPE5W22', ': ', array([ 0, 51, 0, 1]), ' ', array([ 0. , 0.98076923, 0. , 0.01923077]), ' ', array([ 0., 1., 0., 0.])), ('RPE5W23', ': ', array([ 0, 36, 0, 0]), ' ', array([ 0., 1., 0., 0.]), ' ', array([ 0., 1., 0., 0.])), ('RPE5W24', ': ', array([ 0, 21, 5, 0]), ' ', array([ 0. , 0.80769231, 0.19230769, 0. ]), ' ', array([ 0., 1., 0., 0.])), ('RPE5W27', ': ', array([ 0, 36, 0, 0]), ' ', arra…	10000000000	0.993246	0.192308	0.999124	0
826	1	206254681	AATxATC	T	C	[('RPE5W22', ': ', array([ 0, 59, 0, 0]), ' ', array([ 0., 1., 0., 0.]), ' ', array([ 0., 1., 0., 0.])), ('RPE5W23', ': ', array([ 0, 29, 0, 0]), ' ', array([ 0., 1., 0., 0.]), ' ', array([ 0., 1., 0., 0.])), ('RPE5W24', ': ', array([ 0, 38, 12, 0]), ' ', array([ 0. , 0.76, 0.24, 0. ]), ' ', array([ 0., 1., 1., 0.])), ('RPE5W27', ': ', array([ 0, 36, 1, 0]), ' ', array([ 0. , 0.97297297, 0.027027…	10000000000	0.98733	0.24	0.998303	0
827	1	218081070	GTCxAAT	C	T	[('RPE5W22', ': ', array([ 0, 0, 60, 0]), ' ', array([ 0., 0., 1., 0.]), ' ', array([ 0., 0., 1., 0.])), ('RPE5W23', ': ', array([ 0, 0, 41, 0]), ' ', array([ 0., 0., 1., 0.]), ' ', array([ 0., 0., 1., 0.])), ('RPE5W24', ': ', array([ 0, 8, 34, 0]), ' ', array([ 0. , 0.19047619, 0.80952381, 0. ]), ' ', array([ 0., 0., 1., 0.])), ('RPE5W27', ': ', array([ 0, 0, 37, 0]), ' ', array([ 0., 0., 1., 0.…	10000000000	0.995257	0.190476	0.996736	0
828	2	46724915	GGAxACA	C	A	[('RPE5W22', ': ', array([ 0, 0, 46, 0]), ' ', array([ 0., 0., 1., 0.]), ' ', array([ 0., 0., 1., 0.])), ('RPE5W23', ': ', array([ 0, 0, 28, 0]), ' ', array([ 0., 0., 1., 0.]), ' ', array([ 0., 0., 1., 0.])), ('RPE5W24', ': ', array([ 5, 0, 19, 0]), ' ', array([ 0.20833333, 0. , 0.79166667, 0. ]), ' ', array([ 1., 0., 1., 0.])), ('RPE5W27', ': ', array([ 0, 0, 48, 0]), ' ', array([ 0., 0., 1., 0.…	10000000000	0.995377	0.208333	0.999681	0
829	2	138749528	CACxGAG	G	A	[('RPE5W22', ': ', array([ 0, 0, 0, 48]), ' ', array([ 0., 0., 0., 1.]), ' ', array([ 0., 0., 0., 1.])), ('RPE5W23', ': ', array([ 0, 0, 0, 40]), ' ', array([ 0., 0., 0., 1.]), ' ', array([ 0., 0., 0., 1.])), ('RPE5W24', ': ', array([13, 0, 0, 21]), ' ', array([ 0.38235294, 0. , 0. , 0.61764706]), ' ', array([ 1., 0., 0., 1.])), ('RPE5W27', ': ', array([ 0, 0, 0, 37]), ' ', array([ 0., 0., 0., 1.…	10000000000	0.998024	0.382353	1	0
830	2	148409933	CTCxCCT	T	C	[('RPE5W22', ': ', array([ 0, 45, 0, 0]), ' ', array([ 0., 1., 0., 0.]), ' ', array([ 0., 1., 0., 0.])), ('RPE5W23', ': ', array([ 0, 36, 0, 0]), ' ', array([ 0., 1., 0., 0.]), ' ', array([ 0., 1., 0., 0.])), ('RPE5W24', ': ', array([ 0, 21, 7, 0]), ' ', array([ 0. , 0.75, 0.25, 0. ]), ' ', array([ 0., 1., 1., 0.])), ('RPE5W27', ': ', array([ 0, 42, 0, 0]), ' ', array([ 0., 1., 0., 0.]), ' ', arr…	10000000000	0.984437	0.25	0.998655	0
831	2	165619238	CTTxCTC	G	A	[('RPE5W22', ': ', array([ 0, 4, 0, 50]), ' ', array([ 0. , 0.07407407, 0. , 0.92592593]), ' ', array([ 0., 0., 0., 1.])), ('RPE5W23', ': ', array([ 0, 3, 0, 38]), ' ', array([ 0. , 0.07317073, 0. , 0.92682927]), ' ', array([ 0., 0., 0., 1.])), ('RPE5W24', ': ', array([ 9, 1, 0, 17]), ' ', array([ 0.33333333, 0.03703704, 0. , 0.62962963]), ' ', array([ 1., 0., 0., 1.])), ('RPE5W27', ': ', array([…	10000000000	0.938777	0.333333	0.992824	0
832	2	241916082	CTCxGGA	A	T	[('RPE5W22', ': ', array([79, 0, 2, 2]), ' ', array([ 0.95180723, 0. , 0.02409639, 0.02409639]), ' ', array([ 1., 0., 0., 0.])), ('RPE5W23', ': ', array([82, 2, 0, 1]), ' ', array([ 0.96470588, 0.02352941, 0. , 0.01176471]), ' ', array([ 1., 0., 0., 0.])), ('RPE5W24', ': ', array([58, 11, 5, 0]), ' ', array([ 0.78378378, 0.14864865, 0.06756757, 0. ]), ' ', array([ 1., 0., 0., 0.])), ('RPE5W27', '…	10000000000	0.931828	0.148649	0.994204	0
833	3	347391	ATAxATA	A	C	[('RPE5W22', ': ', array([55, 0, 0, 0]), ' ', array([ 1., 0., 0., 0.]), ' ', array([ 1., 0., 0., 0.])), ('RPE5W23', ': ', array([54, 0, 0, 0]), ' ', array([ 1., 0., 0., 0.]), ' ', array([ 1., 0., 0., 0.])), ('RPE5W24', ': ', array([26, 0, 13, 1]), ' ', array([ 0.65 , 0. , 0.325, 0.025]), ' ', array([ 1., 0., 1., 0.])), ('RPE5W27', ': ', array([36, 0, 0, 0]), ' ', array([ 1., 0., 0., 0.]), ' ', ar…	10000000000	1	0.325	1	0
834	3	6258676	CTTxAAA	A	G	[('RPE5W22', ': ', array([47, 0, 0, 0]), ' ', array([ 1., 0., 0., 0.]), ' ', array([ 1., 0., 0., 0.])), ('RPE5W23', ': ', array([44, 0, 1, 0]), ' ', array([ 0.97777778, 0. , 0.02222222, 0. ]), ' ', array([ 1., 0., 0., 0.])), ('RPE5W24', ': ', array([26, 0, 1, 12]), ' ', array([ 0.66666667, 0. , 0.02564103, 0.30769231]), ' ', array([ 1., 0., 0., 1.])), ('RPE5W27', ': ', array([33, 0, 0, 0]), ' ', …	10000000000	0.99146	0.307692	0.999998	0
835	3	34240582	ATCxTTT	T	G	[('RPE5W22', ': ', array([ 0, 51, 0, 0]), ' ', array([ 0., 1., 0., 0.]), ' ', array([ 0., 1., 0., 0.])), ('RPE5W23', ': ', array([ 0, 33, 1, 0]), ' ', array([ 0. , 0.97058824, 0.02941176, 0. ]), ' ', array([ 0., 1., 0., 0.])), ('RPE5W24', ': ', array([ 0, 30, 0, 9]), ' ', array([ 0. , 0.76923077, 0. , 0.23076923]), ' ', array([ 0., 1., 0., 1.])), ('RPE5W27', ': ', array([ 0, 33, 0, 0]), ' ', arra…	10000000000	0.990287	0.230769	0.999502	0
836	3	44604278	CCAxGGT	C	T	[('RPE5W22', ': ', array([ 0, 0, 37, 0]), ' ', array([ 0., 0., 1., 0.]), ' ', array([ 0., 0., 1., 0.])), ('RPE5W23', ': ', array([ 0, 0, 45, 0]), ' ', array([ 0., 0., 1., 0.]), ' ', array([ 0., 0., 1., 0.])), ('RPE5W24', ': ', array([ 1, 7, 23, 0]), ' ', array([ 0.03225806, 0.22580645, 0.74193548, 0. ]), ' ', array([ 0., 1., 1., 0.])), ('RPE5W27', ': ', array([ 0, 0, 35, 0]), ' ', array([ 0., 0.,…	10000000000	1	0.225806	0.999918	0
837	3	59679101	AGTxACA	T	C	[('RPE5W22', ': ', array([ 0, 57, 0, 1]), ' ', array([ 0. , 0.98275862, 0. , 0.01724138]), ' ', array([ 0., 1., 0., 0.])), ('RPE5W23', ': ', array([ 0, 41, 1, 0]), ' ', array([ 0. , 0.97619048, 0.02380952, 0. ]), ' ', array([ 0., 1., 0., 0.])), ('RPE5W24', ': ', array([ 1, 30, 10, 0]), ' ', array([ 0.02439024, 0.73170732, 0.24390244, 0. ]), ' ', array([ 0., 1., 1., 0.])), ('RPE5W27', ': ', array(…	10000000000	0.987803	0.243902	0.994246	0
838	3	102349423	AAAxGTA	G	T	[('RPE5W22', ': ', array([ 0, 0, 0, 59]), ' ', array([ 0., 0., 0., 1.]), ' ', array([ 0., 0., 0., 1.])), ('RPE5W23', ': ', array([ 0, 0, 0, 31]), ' ', array([ 0., 0., 0., 1.]), ' ', array([ 0., 0., 0., 1.])), ('RPE5W24', ': ', array([ 1, 12, 0, 28]), ' ', array([ 0.02439024, 0.29268293, 0. , 0.68292683]), ' ', array([ 0., 1., 0., 1.])), ('RPE5W27', ': ', array([ 0, 0, 0, 39]), ' ', array([ 0., 0.…	10000000000	0.97968	0.292683	0.999719	0
839	3	126835921	TGTxCTA	C	A	[('RPE5W22', ': ', array([ 0, 0, 55, 0]), ' ', array([ 0., 0., 1., 0.]), ' ', array([ 0., 0., 1., 0.])), ('RPE5W23', ': ', array([ 0, 1, 33, 0]), ' ', array([ 0. , 0.02941176, 0.97058824, 0. ]), ' ', array([ 0., 0., 1., 0.])), ('RPE5W24', ': ', array([14, 0, 29, 0]), ' ', array([ 0.3255814, 0. , 0.6744186, 0. ]), ' ', array([ 1., 0., 1., 0.])), ('RPE5W27', ': ', array([ 0, 0, 26, 0]), ' ', array(…	10000000000	0.992614	0.325581	0.999971	0
840	3	143079406	AACxCAG	A	G	[('RPE5W22', ': ', array([51, 0, 0, 0]), ' ', array([ 1., 0., 0., 0.]), ' ', array([ 1., 0., 0., 0.])), ('RPE5W23', ': ', array([43, 0, 1, 0]), ' ', array([ 0.97727273, 0. , 0.02272727, 0. ]), ' ', array([ 1., 0., 0., 0.])), ('RPE5W24', ': ', array([20, 0, 0, 9]), ' ', array([ 0.68965517, 0. , 0. , 0.31034483]), ' ', array([ 1., 0., 0., 1.])), ('RPE5W27', ': ', array([35, 0, 0, 0]), ' ', array([ …	10000000000	0.99501	0.310345	0.999998	0
841	3	147561779	AAGxAGG	C	A	[('RPE5W22', ': ', array([ 1, 0, 51, 0]), ' ', array([ 0.01923077, 0. , 0.98076923, 0. ]), ' ', array([ 0., 0., 1., 0.])), ('RPE5W23', ': ', array([ 0, 1, 40, 0]), ' ', array([ 0. , 0.02439024, 0.97560976, 0. ]), ' ', array([ 0., 0., 1., 0.])), ('RPE5W24', ': ', array([11, 0, 20, 1]), ' ', array([ 0.34375, 0. , 0.625 , 0.03125]), ' ', array([ 1., 0., 1., 0.])), ('RPE5W27', ': ', array([ 0, 0, 30,…	10000000000	0.993121	0.34375	1	0
842	3	164260648	TAGxGGT	A	G	[('RPE5W22', ': ', array([56, 0, 0, 0]), ' ', array([ 1., 0., 0., 0.]), ' ', array([ 1., 0., 0., 0.])), ('RPE5W23', ': ', array([35, 1, 0, 0]), ' ', array([ 0.97222222, 0.02777778, 0. , 0. ]), ' ', array([ 1., 0., 0., 0.])), ('RPE5W24', ': ', array([34, 0, 0, 15]), ' ', array([ 0.69387755, 0. , 0. , 0.30612245]), ' ', array([ 1., 0., 0., 1.])), ('RPE5W27', ': ', array([35, 0, 0, 3]), ' ', array([…	10000000000	0.985018	0.306122	0.999164	0
843	3	181006489	TCCxAAT	C	A	[('RPE5W22', ': ', array([ 0, 0, 40, 0]), ' ', array([ 0., 0., 1., 0.]), ' ', array([ 0., 0., 1., 0.])), ('RPE5W23', ': ', array([ 0, 0, 34, 0]), ' ', array([ 0., 0., 1., 0.]), ' ', array([ 0., 0., 1., 0.])), ('RPE5W24', ': ', array([14, 0, 26, 0]), ' ', array([ 0.35, 0. , 0.65, 0. ]), ' ', array([ 1., 0., 1., 0.])), ('RPE5W27', ': ', array([ 0, 0, 41, 0]), ' ', array([ 0., 0., 1., 0.]), ' ', arr…	10000000000	0.992326	0.35	0.999986	0
844	3	183064528	AAAxATC	A	G	[('RPE5W22', ': ', array([56, 0, 1, 1]), ' ', array([ 0.96551724, 0. , 0.01724138, 0.01724138]), ' ', array([ 1., 0., 0., 0.])), ('RPE5W23', ': ', array([43, 0, 0, 0]), ' ', array([ 1., 0., 0., 0.]), ' ', array([ 1., 0., 0., 0.])), ('RPE5W24', ': ', array([32, 0, 0, 10]), ' ', array([ 0.76190476, 0. , 0. , 0.23809524]), ' ', array([ 1., 0., 0., 1.])), ('RPE5W27', ': ', array([37, 0, 0, 0]), ' ', …	10000000000	0.991518	0.238095	0.999666	0
845	4	27675812	TAAxTAC	A	G	[('RPE5W22', ': ', array([41, 0, 1, 0]), ' ', array([ 0.97619048, 0. , 0.02380952, 0. ]), ' ', array([ 1., 0., 0., 0.])), ('RPE5W23', ': ', array([38, 0, 0, 0]), ' ', array([ 1., 0., 0., 0.]), ' ', array([ 1., 0., 0., 0.])), ('RPE5W24', ': ', array([28, 0, 0, 7]), ' ', array([ 0.8, 0. , 0. , 0.2]), ' ', array([ 1., 0., 0., 0.])), ('RPE5W27', ': ', array([42, 0, 0, 0]), ' ', array([ 1., 0., 0., 0.…	10000000000	0.995378	0.2	0.996515	0
846	4	35324141	CTGxAAA	C	A	[('RPE5W22', ': ', array([ 1, 0, 54, 0]), ' ', array([ 0.01818182, 0. , 0.98181818, 0. ]), ' ', array([ 0., 0., 1., 0.])), ('RPE5W23', ': ', array([ 0, 0, 40, 1]), ' ', array([ 0. , 0. , 0.97560976, 0.02439024]), ' ', array([ 0., 0., 1., 0.])), ('RPE5W24', ': ', array([15, 0, 24, 0]), ' ', array([ 0.38461538, 0. , 0.61538462, 0. ]), ' ', array([ 1., 0., 1., 0.])), ('RPE5W27', ': ', array([ 0, 0, …	10000000000	0.995955	0.384615	1	0
847	4	42665793	TTTxCTT	G	A	[('RPE5W22', ': ', array([ 0, 0, 0, 43]), ' ', array([ 0., 0., 0., 1.]), ' ', array([ 0., 0., 0., 1.])), ('RPE5W23', ': ', array([ 0, 0, 0, 37]), ' ', array([ 0., 0., 0., 1.]), ' ', array([ 0., 0., 0., 1.])), ('RPE5W24', ': ', array([11, 0, 0, 43]), ' ', array([ 0.2037037, 0. , 0. , 0.7962963]), ' ', array([ 1., 0., 0., 1.])), ('RPE5W27', ': ', array([ 0, 0, 0, 37]), ' ', array([ 0., 0., 0., 1.])…	10000000000	0.992629	0.203704	0.995436	0
848	4	58955222	ATTxGAC	C	T	[('RPE5W22', ': ', array([ 0, 0, 47, 0]), ' ', array([ 0., 0., 1., 0.]), ' ', array([ 0., 0., 1., 0.])), ('RPE5W23', ': ', array([ 0, 0, 36, 0]), ' ', array([ 0., 0., 1., 0.]), ' ', array([ 0., 0., 1., 0.])), ('RPE5W24', ': ', array([ 0, 12, 39, 0]), ' ', array([ 0. , 0.23529412, 0.76470588, 0. ]), ' ', array([ 0., 1., 1., 0.])), ('RPE5W27', ': ', array([ 0, 0, 26, 0]), ' ', array([ 0., 0., 1., 0…	10000000000	0.996753	0.235294	0.996393	0
849	4	61232033	ACTxACT	T	A	[('RPE5W22', ': ', array([ 0, 74, 0, 0]), ' ', array([ 0., 1., 0., 0.]), ' ', array([ 0., 1., 0., 0.])), ('RPE5W23', ': ', array([ 0, 43, 0, 0]), ' ', array([ 0., 1., 0., 0.]), ' ', array([ 0., 1., 0., 0.])), ('RPE5W24', ': ', array([13, 31, 0, 0]), ' ', array([ 0.29545455, 0.70454545, 0. , 0. ]), ' ', array([ 1., 1., 0., 0.])), ('RPE5W27', ': ', array([ 0, 44, 0, 0]), ' ', array([ 0., 1., 0., 0.…	10000000000	0.993663	0.295455	0.999921	0
[truncated: 1,135 more rows]
